# Supplementary material for: A Genome-Wide View of the Transcriptome Dynamics of Fresh-Cut Potato Tubers
Source: Genes (Basel). 2023 Jan 10;14(1):181. doi: 10.3390/genes14010181 (PMC9859442; doi:10.3390/genes14010181)
Supplement: Supplementary file 1 [file genes-14-00181-s001.zip]

Archive with 13 entries (13 files):
- Figure S1 Correlation matrix between samples.jpg
- Figure S2 PCA analysis.jpg
- Figure S3 qRT-PCR varification.jpg
- Figure S4 GO enrichment of specific DEGs at different time after cut-wounding.pdf
- Table S1. The primers used for real-time PCR in this study.xlsx
- Table S2. Quality of transcriptome data.xlsx
- Table S3. Statistical analysis of assembly reads mapped to the transcript.xlsx
- Table S4. The DEGs of potato tubers at different time after cut-wounding.xlsx
- Table S5. GO and KEGG enrichment of common DEGs at different time after cut-wounding.xlsx
- Table S6. The GO enrichment of specific DEGs at different time after cut-wounding.xlsx
- Table S7. The information of antioxidant enzymes and enzymatic browning-related genes.xlsx
- Table S8. The  information of genes with Log2FC more than 6.xlsx
- Table S9 The transcriptional factors in response to cut-wounding at different time.xlsx
