# Supplementary material for: A Genome-Wide View of the Transcriptome Dynamics of Fresh-Cut Potato Tubers
Source: Genes (Basel). 2023 Jan 10;14(1):181. doi: 10.3390/genes14010181 (PMC9859442; doi:10.3390/genes14010181)
Supplement: Supplementary file 1 [file genes-14-00181-s001.zip › Table S1. The primers used for real-time PCR in this study.xlsx]

## Sheet: Sheet1
Table S1 The primers used for real-time PCR in this study
Gene_ID	Primer name	Sequence(5'-3')	length（bp）	Tm(℃)	GC content(%)	Gene_description
PGSC0003DMG400015214	P5214_F	GGAAGCACCACCACCAACAAGAA	117	59.9	52.2	Conserved gene of unknown function
	P5214_R	CGTCTGAATGGCTGGTTCACTGT		59.5	52.2
PGSC0003DMG400015548	P5548_F	TGGTGTTGTCTCTTGTGCCGATA	113	58.4	47.8	Peroxidase 15
	P5548_R	TTGCGGTTCTACTGTCTCTTCGT		58.2	47.8
PGSC0003DMG400026575	P6575_F	GCAGCACGAGATTCTGTTGTCAA	120	58.3	47.8	Class III peroxidase
	P6575_R	CGAAGTTGGTCCAGGAAGATTGC		58.3	52.2
PGSC0003DMG400024019	P4019_F	CGCAACAAGTATCGTGTGCTGAC	160	59.2	52.2	Peroxidase 29
	P4019_R	CCCAAGTTTGAGGGAGGAAGTGA		58.3	52.2
PGSC0003DMG400003563	P3563_F	AGTGTCCAGAGCCTGACCTTACC	140	59.8	56.5	Flavanone 3 beta-hydroxylase
	P3563_R	AACGGGCTGAACAGTGATCCAAG		59.5	52.2
PGSC0003DMG400024643	P4643_F	CGATCCACAAGCGGAGGAGTTC	117	59.4	59.1	Flavonoid 3'-monooxygenase
	P4643_R	GCTACGCCTTGAATGTCCATCCA		59.4	52.2
PGSC0003DMG400020334	P0334_F	TCATCATAACCAGCACCACCACTAT	156	58.5	44	Prephenate dehydrogenase
	P0334_R	TTGTCATCAAGACCTGGAACTGAGA		58.3	44
PGSC0003DMG400031791	P1791_F	ATATTTGGTAACGCAGCAGTC	165	55	42.9	Pectinesterase
	P1791_R	AATTAGATCAGCAGCAGAGGC		56.6	47.6
PGSC0003DMG400011036	P1036_F	ATTTGGAGGTAACAAAGAGCC	172	55.7	42.9	Light-inducible protein atls1
	P1036_R	GGTAGCCATTGTGGTATCGTA		55.4	47.6
PGSC0003DMG400010357	P0357_F	ACGATATTGAATTTACCGTGTC	100	54.2	36.4	Phloem protein 2
	P0357_R	CTCCATTGAGTGTTATCTCCC		53.7	47.6
PGSC0003DMG400010815	P0815_F	ACTCAATCCAAACAAACCCAA	132	57.1	38.1	PME inhibitor
	P0815_R	CATGTGCTTCTGCTGGACCTA		58.6	52.4
PGSC0003DMG400015468	P5468_F	ATTGCCTCTGAGACTTGGATG	178	56.7	47.6	Sugar transporter
	P5468_R	TTCAGCTTCTTCAGGGTCGTT		59.1	47.6
PGSC0003DMG400027645	P7645_F	GGCGACATCGGTTGGGTT	110	60.359	61.111	Gibberellin 2-oxidase [Source:PGSC_GENE%3BAcc:PGSC0003DMG400027645]
	P7645_R	ACCGCAGCCCGAATGTTT	110	60.282	55.556
PGSC0003DMG400001823	P1823_F	GCCTTCAAGCCTGGCTGG	134	61.067	66.667	Ent-kaurenoic acid oxidase [Source:PGSC_GENE%3BAcc:PGSC0003DMG400001823]
	P1823_R	GACAACGCCTCGTGACCA	134	59.972	61.111
PGSC0003DMG400009021	P9021_F	ATGGAAAGGGAAGCCGCG	80	60.438	61.111	Gibberellin 2-oxidase [Source:PGSC_GENE%3BAcc:PGSC0003DMG400009021]
	P9021_R	TAACCAAAGGGAGCCGCG	80	60.047	61.111
PGSC0003DMG400000277	P0277_F	GGGGACAAGCCATGGCAA	129	60.284	61.111	Cytokinin oxidase/dehydrogenase 2 [Source:PGSC_GENE%3BAcc:PGSC0003DMG400000277]
	P0277_R	CACCTCCAACATCCGCGT	129	60.047	61.111
PGSC0003DMG400005960	P5960_F	TCGTTTCATCGCCGTCCA	85	59.348	55.556	Glucosyltransferase [Source:PGSC_GENE%3BAcc:PGSC0003DMG400005960]
	P5960_R	ACCTTGAAGGCGCGGTTT	85	60.203	55.556
PGSC0003DMG400021426	P1426_F	CGGGTTGGTTCCGTGCAT	96	60.672	61.111	1-aminocyclopropane-1-carboxylate synthase 3 [Source:PGSC_GENE%3BAcc:PGSC0003DMG400021426]
	P1426_R	TGGGAGCAGTGGACTCGA	96	59.883	61.111
PGSC0003DMG401021549	P1549_F	CGATCACTGCCTCGGGTG	140	60.203	66.667	Phenylalanine ammonia-lyase [Source:PGSC_GENE%3BAcc:PGSC0003DMG401021549]
	P1549_R	ACCACTAACACCAGCCGC	140	59.968	61.111
PGSC0003DMG402021564	P1564_F	CGGTCACTGCCTCAGGTG	133	60.048	66.667	Phenylalanine ammonia-lyase [Source:PGSC_GENE%3BAcc:PGSC0003DMG401021564]
	P1564_R	ACACCAGCCACACGGAAC	133	60.203	61.111
PGSC0003DMG400031365	P1365_F	GAGTGCCAGAGTCGCGTT	110	60.049	61.111	Phenylalanine ammonia-lyase [Source:PGSC_GENE%3BAcc:PGSC0003DMG400031365]
	P1365_R	ATTCCGTCCCGAGCTCCT	110	60.043	61.111
PGSC0003DMG400009906	P9906_F	CAGAGGTGCCAGTGCCAA	99	59.886	61.111	Catalase isozyme 3 [Source:PGSC_GENE%3BAcc:PGSC0003DMG400009906]
	P9906_R	ACAGGTGTCTGGACCCCA	99	59.711	61.111
PGSC0003DMG400009908	P9908_F	AGCAGAGACGCTCCGAGA	103	60.046	61.111	Gene of unknown function [Source:PGSC_GENE%3BAcc:PGSC0003DMG400009908]
	P9908_R	CTAGCGATGGCGAGACGG	103	60.051	66.667
PGSC0003DMG400029408	P9408_F	TCGCGATGGTGCCATGAA	87	59.733	55.556	Catalase [Source:PGSC_GENE%3BAcc:PGSC0003DMG400029408]
	P9408_R	TGCTCAGCAGGACGACAAG	87	60.006	57.895
PGSC0003DMG400029576	P9576_F	CTGCTGCTCCCTCACCAC	107	60.047	66.667	Polyphenol oxidase [Source:PGSC_GENE%3BAcc:PGSC0003DMG400029576]
	P9576_R	TGTGGGGATAGGAGGGGG	107	59.291	66.667
PGSC0003DMG400018916	P8916_F	GTACAGTTGTTGCGCGCC	89	60.127	61.111	Polyphenol oxidase [Source:PGSC_GENE%3BAcc:PGSC0003DMG400018916]
	P8916_R	GCTGACGAACACGGAGCT	89	60.049	61.111
PGSC0003DMG400029575	P9575_F	ACGCTCCCATGCCAACTC	127	60.046	61.111	Catechol oxidase B%2C chloroplastic [Source:PGSC_GENE%3BAcc:PGSC0003DMG400029575]
	P9575_R	ATCGCACGGTCCAGCTTC	127	60.126	61.111
StuPPO2	U22921_F	ATATCGCGACTGTTGATTTCC	133	56.5	42.9	polyphenol oxidse
	U22921_R	GTCGCACCTTCAATGGAGATA		57.8	47.6
StuPPO3	U22922_F	GGGGTACGATTACGCACCAA	121	60.1	55	polyphenol oxidse
	U22922_R	CGCAAGTGGGAATACCTCGT		60.1	55
PGSC0003DMG400016647	P6647_F	GATGCTCCTACCGTCGCC	109	59.972	66.667	Superoxide dismutase [Mn]%2C mitochondrial [Source:PGSC_GENE%3BAcc:PGSC0003DMG400016647]
	P6647_R	CACCACCCTCGCTGACAG	109	60.048	66.667
PGSC0003DMG400027577	P7577_F	GGAAGCATCACAGGGCGT	146	60.046	61.111	Superoxide dismutase [Source:PGSC_GENE%3BAcc:PGSC0003DMG400027577]
	P7577_F	CCAGGCCTGAGCAGCATT	146	60.044	61.111
PGSC0003DMG401025083	P5083_F	AACGGAGCAAGCGACGAT	94	59.738	55.556	Peroxidase [Source:PGSC_GENE%3BAcc:PGSC0003DMG402025083]
	P5083_R	GGTCGCATCGAGGCCTTT	94	60.125	61.111
PGSC0003DMG400032147	P2147_F	GGCTGGAGGTCCATCATGG	106	59.85	63.158	Peroxidase [Source:PGSC_GENE%3BAcc:PGSC0003DMG400032147]
	P2147_R	TGCAAGGGTTTCAGTGGGA	106	59.073	52.632
PGSC0003DMG400020252	P0252_F	CCCAGGCATCTCGGGTTG	132	60.125	66.667	Peroxidase 55 [Source:PGSC_GENE%3BAcc:PGSC0003DMG400020252]
	P0252_R	AGCCAAGTGTGTGAGCCC	132	59.886	61.111
PGSC0003DMG400005062	P5062_F	CCCTTGCTGCTCGTGACT	107	59.655	61.111	Peroxidase [Source:PGSC_GENE%3BAcc:PGSC0003DMG400005062]
	P5062_R	TTGGATTAACGCGCCGGT	107	60.047	55.556
PGSC0003DMG400012316	P2316_F	ACCCGGGAGCAAGGATCA	131	60.285	61.111	Respiratory burst oxidase homolog protein A [Source:PGSC_GENE%3BAcc:PGSC0003DMG400012316]
	P2316_R	GCTGAACGTGCATCCCCT	131	60.046	61.111
PGSC0003DMG400014168	P4168_F	GCGCCCAACTCCTACTGG	95	60.125	66.667	Respiratory burst oxidase homolog protein C [Source:PGSC_GENE%3BAcc:PGSC0003DMG400014168]
	P4168_R	CGCCACCGTCAGTTTTGC	95	60.051	61.111
PGSC0003DMG400024754	P4754_F	TGCATCACATCTCCCGCG	93	60.203	61.111	Respiratory burst oxidase homolog protein B [Source:PGSC_GENE%3BAcc:PGSC0003DMG400024754]
	P4754_R	GAAAGTTTGCAGCCGGGC	93	60.049	61.111
