# Supplementary material for: A Genome-Wide View of the Transcriptome Dynamics of Fresh-Cut Potato Tubers
Source: Genes (Basel). 2023 Jan 10;14(1):181. doi: 10.3390/genes14010181 (PMC9859442; doi:10.3390/genes14010181)
Supplement: Supplementary file 1 [file genes-14-00181-s001.zip › Table S2. Quality of transcriptome data.xlsx]

## Sheet: Sheet1
Table S2 Quality of transcriptome data.
Sample name	Raw reads	Clean reads	Clean bases(G)	Error rate(%)	Q20(%)	Q30(%)	GC content(%)
X0h1	40936248	40208822	6.03	0.03	96.3	90.54	43.47
X0h2	56303662	55382406	8.31	0.03	97.55	93.23	43.5
X0h3	47214092	46435192	6.97	0.03	97.21	92.49	43.48
X4h1	44630058	43881382	6.58	0.03	97.02	92.08	43.25
X4h2	40211962	39663282	5.95	0.03	97.02	92.09	43.23
X4h3	42325756	41675898	6.25	0.03	97.26	92.56	43.2
X12h1	58626602	57644390	8.65	0.03	97.53	93.1	43.04
X12h2	54142864	53217862	7.98	0.03	97.25	92.51	43.1
X12h3	42993754	42234820	6.34	0.03	97.3	92.65	42.89
X24h1	42283262	41767548	6.27	0.03	97.26	92.55	42.72
X24h2	48709162	48211338	7.23	0.03	97.12	92.27	42.78
X24h3	47852760	47361790	7.1	0.03	97.12	92.23	42.29
Total	566230182	557684730	83.66
