# Supplementary material for: A Genome-Wide View of the Transcriptome Dynamics of Fresh-Cut Potato Tubers
Source: Genes (Basel). 2023 Jan 10;14(1):181. doi: 10.3390/genes14010181 (PMC9859442; doi:10.3390/genes14010181)
Supplement: Supplementary file 1 [file genes-14-00181-s001.zip › Table S3. Statistical analysis of assembly reads mapped to the transcript.xlsx]

## Sheet: Table S3
Table S3 Statistical analysis of assembly reads mapped to the transcript.
Sample_name	X2_0 h_1	X2_0 h_2	X2_0 h_3	X2_4 h_1	X2_4 h_2	X2_4 h_3	X2_12 h_1	X2_12 h_2	X2_12 h_3	X2_24 h_1	X2_24 h_2	X2_24 h_3
Total reads	40208822	55382406	46435192	43881382	39663282	41675898	57644390	53217862	42234820	41767548	48211338	47361790
Total mapped	34179176 (85%)	48215244 (87.06%)	40103775 (86.37%)	38052114 (86.72%)	34377072 (86.67%)	36267708 (87.02%)	50528622 (87.66%)	46304287 (87.01%)	36625737 (86.72%)	35817455 (85.75%)	41308465 (85.68%)	40136583 (84.74%)
Multiple mapped	1359276 (3.38%)	1943330 (3.51%)	1408401 (3.03%)	1192282 (2.72%)	1046765 (2.64%)	1088330 (2.61%)	1868621 (3.24%)	1712458 (3.22%)	1320644 (3.13%)	1542182 (3.69%)	1812610 (3.76%)	1915339 (4.04%)
Uniquely mapped	32819900 (81.62%)	46271914 (83.55%)	38695374 (83.33%)	36859832 (84%)	33330307 (84.03%)	35179378 (84.41%)	48660001 (84.41%)	44591829 (83.79%)	35305093 (83.59%)	34275273 (82.06%)	39495855 (81.92%)	38221244 (80.7%)
Reads map to '+'	16386045 (40.75%)	23116696 (41.74%)	19332791 (41.63%)	18409774 (41.95%)	16649069 (41.98%)	17573323 (42.17%)	24302203 (42.16%)	22267869 (41.84%)	17628118 (41.74%)	17120762 (40.99%)	19728243 (40.92%)	19091027 (40.31%)
Reads map to '-'	16433855 (40.87%)	23155218 (41.81%)	19362583 (41.7%)	18450058 (42.05%)	16681238 (42.06%)	17606055 (42.25%)	24357798 (42.26%)	22323960 (41.95%)	17676975 (41.85%)	17154511 (41.07%)	19767612 (41%)	19130217 (40.39%)
