# Supplementary material for: A Genome-Wide View of the Transcriptome Dynamics of Fresh-Cut Potato Tubers
Source: Genes (Basel). 2023 Jan 10;14(1):181. doi: 10.3390/genes14010181 (PMC9859442; doi:10.3390/genes14010181)
Supplement: Supplementary file 1 [file genes-14-00181-s001.zip › Table S4. The DEGs of potato tubers at different time after cut-wounding.xlsx]

## Sheet: X2_4h_Up
TableS4 The up-regulated DEGs of X2 tuters at 4 h after cut-wounding
gene_id	4h_readcount	0h_readcount	log2FoldChange	pval	padj
PGSC0003DMG400021574	16868.4	568.705	4.8905	8.6844e-280	2.4823e-275
PGSC0003DMG400018651	15023.7	578.687	4.6983	5.4644e-258	3.1376e-254
PGSC0003DMG400026671	86455.3	4060.67	4.4122	5.4884e-258	3.1376e-254
PGSC0003DMG400003655	17172.9	733.17	4.5498	2.3854e-252	9.7404e-249
PGSC0003DMG400032250	12380.6	505.133	4.6153	1.2969e-251	4.6337e-248
PGSC0003DMG400013879	9754.8	428.682	4.5081	4.6695e-235	1.1123e-231
PGSC0003DMG400008557	10166.5	441.564	4.5251	1.7811e-234	3.6366e-231
PGSC0003DMG400024961	5251.62	174.997	4.9074	5.0497e-234	9.6226e-231
PGSC0003DMG400013235	57356.4	3257.57	4.1381	6.8434e-230	1.1592e-226
PGSC0003DMG400017936	4207.17	125.274	5.0697	6.1086e-228	9.7005e-225
PGSC0003DMG400031364	34717.2	2012.06	4.1089	5.1882e-224	7.0619e-221
PGSC0003DMG400006214	11369.4	596.274	4.253	4.47e-220	5.1108e-217
PGSC0003DMG402020132	3865.94	131.933	4.8729	1.3477e-215	1.3758e-212
PGSC0003DMG400011640	17583.8	566.309	4.9565	1.3296e-212	1.3106e-209
PGSC0003DMG400006461	4382.59	176.113	4.6372	3.1353e-211	2.9873e-208
PGSC0003DMG400023680	6143.76	288.44	4.4128	2.3436e-209	2.161e-206
PGSC0003DMG400037250	110714	6463.26	4.0984	7.0719e-208	6.3169e-205
PGSC0003DMG400032124	7233.38	388.688	4.218	1.6183e-201	1.2849e-198
PGSC0003DMG400012019	4141.9	172.395	4.5865	1.8845e-201	1.4558e-198
PGSC0003DMG400002826	14670.8	950.5	3.9481	6.4674e-200	4.8649e-197
PGSC0003DMG400030503	3500.03	137.533	4.6695	7.8106e-199	5.5814e-196
PGSC0003DMG400002730	31280.3	2225.23	3.8132	2.1113e-198	1.4719e-195
PGSC0003DMG401025083	6607.23	364.392	4.1805	2.9504e-195	2.0079e-192
PGSC0003DMG400007373	6161.48	348.646	4.1434	2.2997e-194	1.5287e-191
PGSC0003DMG400008936	2856.85	101.053	4.8212	2.6057e-193	1.6928e-190
PGSC0003DMG400002047	4235.11	200.287	4.4023	4.3258e-193	2.7478e-190
PGSC0003DMG400029915	3978.12	181.414	4.4547	2.3247e-191	1.3844e-188
PGSC0003DMG400001438	5442.36	300.019	4.1811	1.7612e-189	1.0116e-186
PGSC0003DMG400016168	12910.7	944.476	3.7729	2.2934e-185	1.2854e-182
PGSC0003DMG400001549	21976.8	1734.53	3.6634	1.4275e-182	7.5564e-180
PGSC0003DMG400006462	5048.04	311.613	4.0179	9.382e-180	4.7048e-177
PGSC0003DMG400027181	4387.96	240.901	4.187	1.896e-179	9.3439e-177
PGSC0003DMG400010815	2048.82	60.7553	5.0756	2.7239e-179	1.3197e-176
PGSC0003DMG400028214	20626.9	1674.05	3.6231	1.7997e-178	8.2972e-176
PGSC0003DMG400009033	3422.46	167.037	4.3568	2.746e-178	1.2459e-175
PGSC0003DMG400029237	3353.08	163	4.3625	1.1469e-177	5.1224e-175
PGSC0003DMG400022405	18776	1096.65	4.0977	1.1869e-175	5.1403e-173
PGSC0003DMG400002201	10544.5	798.767	3.7226	2.7763e-175	1.1844e-172
PGSC0003DMG400000640	6635.76	462.949	3.8413	5.2891e-174	2.2233e-171
PGSC0003DMG400003509	3093.77	153.613	4.332	1.2418e-173	5.1443e-171
PGSC0003DMG400005498	4874.8	129.849	5.2304	1.7122e-168	6.7973e-166
PGSC0003DMG400032227	3363.39	174.454	4.269	6.3181e-167	2.4739e-164
PGSC0003DMG400020742	6186.51	271.611	4.5095	2.9102e-166	1.1241e-163
PGSC0003DMG400001066	2264.87	96.564	4.5518	4.7617e-164	1.7676e-161
PGSC0003DMG401030469	28071.4	2666.2	3.3962	9.9696e-164	3.6535e-161
PGSC0003DMG400030701	9317.81	781.75	3.5752	1.3261e-163	4.7983e-161
PGSC0003DMG400005284	3111.25	179.455	4.1158	1.2179e-160	4.3517e-158
PGSC0003DMG400028287	73972	2736.01	4.7568	5.7013e-159	2.0119e-156
PGSC0003DMG400020708	3142.99	191.335	4.038	9.6085e-158	3.309e-155
PGSC0003DMG400009068	4392.1	327.947	3.7434	1.4252e-155	4.7927e-153
PGSC0003DMG400017301	1683.37	60.936	4.7879	1.8787e-155	6.2442e-153
PGSC0003DMG400032820	6471.76	381.773	4.0834	2.9066e-154	9.5497e-152
PGSC0003DMG400013434	4383.19	335.13	3.7092	6.236e-154	2.0256e-151
PGSC0003DMG400024594	5501.29	421.328	3.7068	3.376e-153	1.0722e-150
PGSC0003DMG402030469	20607.8	2094.32	3.2986	7.2414e-153	2.2746e-150
PGSC0003DMG400014055	15473.8	786.128	4.2989	1.0446e-151	3.2107e-149
PGSC0003DMG400004572	4345.41	341.894	3.6679	7.9522e-150	2.3434e-147
PGSC0003DMG400009004	5636.08	484.779	3.5393	4.0017e-149	1.1672e-146
PGSC0003DMG400020343	31642.6	1930.4	4.0349	4.1772e-148	1.2061e-145
PGSC0003DMG400002133	5109.78	425.971	3.5844	4.9461e-148	1.4138e-145
PGSC0003DMG400000227	3594.16	272.169	3.7231	5.8194e-145	1.5994e-142
PGSC0003DMG400001395	4106.23	333.025	3.6241	3.5244e-144	9.3279e-142
PGSC0003DMG400028498	1899.81	95.5324	4.3137	5.4161e-144	1.4203e-141
PGSC0003DMG400010833	19606.7	2130.79	3.2019	8.683e-144	2.2563e-141
PGSC0003DMG400001508	7161.85	698.403	3.3582	1.4768e-143	3.803e-141
PGSC0003DMG400009159	9495.25	989.933	3.2618	8.2266e-143	2.0448e-140
PGSC0003DMG400018548	1924.71	102.591	4.2297	2.0912e-142	5.153e-140
PGSC0003DMG400008358	4592.85	398.884	3.5253	7.6294e-142	1.8639e-139
PGSC0003DMG400012020	1331.64	44.4777	4.904	1.3319e-141	3.2265e-139
PGSC0003DMG400008182	6082.67	585.089	3.378	8.6846e-140	1.9859e-137
PGSC0003DMG400005611	16564.5	1900.1	3.1239	1.3337e-139	3.0255e-137
PGSC0003DMG400002552	13235.7	1474.95	3.1657	1.9183e-139	4.2838e-137
PGSC0003DMG402012862	3014.85	221.75	3.7651	5.7364e-139	1.2711e-136
PGSC0003DMG400022399	2205.42	91.7777	4.5868	1.5982e-138	3.4872e-136
PGSC0003DMG400001448	12295.2	1036.03	3.569	2.7547e-138	5.9203e-136
PGSC0003DMG400030495	4360.76	393.595	3.4698	1.1737e-137	2.5037e-135
PGSC0003DMG400022911	3289.26	261.519	3.6528	4.4023e-137	9.3212e-135
PGSC0003DMG401012862	2308.25	153.159	3.9137	4.6707e-136	9.8166e-134
PGSC0003DMG400027075	2261.65	151.564	3.8994	7.3952e-135	1.5099e-132
PGSC0003DMG400015745	26661.4	3272.77	3.0262	1.2662e-134	2.5487e-132
PGSC0003DMG400019245	1739.47	92.9473	4.2261	2.7669e-134	5.5307e-132
PGSC0003DMG400028127	138263	17860.8	2.9525	8.4583e-134	1.679e-131
PGSC0003DMG400010357	805.696	8.96169	6.4903	6.4713e-133	1.2757e-130
PGSC0003DMG400001639	1515.74	72.4294	4.3873	1.5786e-132	3.0695e-130
PGSC0003DMG400013894	1119.67	34.1134	5.0366	2.686e-132	5.1877e-130
PGSC0003DMG400030842	4692.54	341.556	3.7802	4.9601e-130	9.3894e-128
PGSC0003DMG400018150	7360.13	829.802	3.1489	3.5375e-129	6.5236e-127
PGSC0003DMG400014791	4467.4	157.323	4.8276	5.1384e-129	9.3552e-127
PGSC0003DMG400011721	3694.29	336.459	3.4568	2.1878e-128	3.9085e-126
PGSC0003DMG400018800	4345.12	433.964	3.3238	9.7591e-128	1.7326e-125
PGSC0003DMG400002658	5940.18	462.537	3.6829	1.1276e-127	1.9774e-125
PGSC0003DMG400024876	10532.3	1274.84	3.0464	3.1664e-127	5.5189e-125
PGSC0003DMG400030309	1237.4	52.3802	4.5621	8.4124e-127	1.4313e-124
PGSC0003DMG400023428	4387.87	455.197	3.269	1.0205e-126	1.726e-124
PGSC0003DMG400004795	7020.1	183.5	5.2576	1.9268e-126	3.2398e-124
PGSC0003DMG400002291	981.809	27.4487	5.1606	4.0024e-126	6.613e-124
PGSC0003DMG400031812	8050.03	953.612	3.0775	4.4896e-126	7.3754e-124
PGSC0003DMG400020937	1148.09	45.6477	4.6525	1.2048e-124	1.8921e-122
PGSC0003DMG400023590	11735.4	1479.59	2.9876	2.1906e-124	3.4031e-122
PGSC0003DMG400028611	4936.63	508.116	3.2803	1.6823e-123	2.5578e-121
PGSC0003DMG400006709	1232.49	39.7665	4.9539	5.9019e-123	8.8325e-121
PGSC0003DMG400019511	6964.01	836.684	3.0572	6.2752e-123	9.3423e-121
PGSC0003DMG400021427	2700.6	194.605	3.7947	7.83e-122	1.1597e-119
PGSC0003DMG400014867	1627.99	104.392	3.963	9.4864e-122	1.3977e-119
PGSC0003DMG400008932	1996.89	147.141	3.7625	1.7352e-121	2.5305e-119
PGSC0003DMG400032498	844.146	19.8748	5.4085	1.9755e-121	2.8664e-119
PGSC0003DMG400018515	21735.5	2984.34	2.8646	6.5382e-121	9.3914e-119
PGSC0003DMG400005036	2353.97	203.966	3.5287	2.2718e-119	3.1989e-117
PGSC0003DMG400017584	6040.61	597.264	3.3383	3.1854e-119	4.4633e-117
PGSC0003DMG400024860	3670.51	393.33	3.2222	3.6525e-118	5.0194e-116
PGSC0003DMG400032211	2975.85	118.115	4.655	5.4471e-118	7.4143e-116
PGSC0003DMG400030882	1908.03	139.257	3.7763	7.7135e-118	1.0449e-115
PGSC0003DMG400024998	1054.59	27.038	5.2856	1.4231e-117	1.9188e-115
PGSC0003DMG400022496	3414.3	355.004	3.2657	1.2054e-116	1.61e-114
PGSC0003DMG400008144	1960.47	153.822	3.6719	2.0773e-116	2.749e-114
PGSC0003DMG400004996	1098.85	49.5598	4.4707	4.2232e-116	5.5374e-114
PGSC0003DMG400022741	889.348	27.053	5.0389	4.4252e-116	5.7758e-114
PGSC0003DMG400000468	1330.19	77.4516	4.1022	1.395e-115	1.8124e-113
PGSC0003DMG400014051	1656.13	117.869	3.8126	1.4941e-115	1.9237e-113
PGSC0003DMG400001854	990.142	38.4115	4.688	5.225e-115	6.5794e-113
PGSC0003DMG400023576	2424.49	225.645	3.4256	4.3115e-114	5.335e-112
PGSC0003DMG400022013	1238.72	66.0324	4.2295	4.5067e-114	5.5525e-112
PGSC0003DMG400000791	2207.04	197.083	3.4852	1.3774e-113	1.6754e-111
PGSC0003DMG400020131	2145.95	74.9991	4.8386	2.2568e-113	2.7335e-111
PGSC0003DMG400027906	6861.4	900.532	2.9297	2.6027e-113	3.1259e-111
PGSC0003DMG400024392	32051.3	4840.47	2.7272	3.9802e-113	4.7603e-111
PGSC0003DMG400027127	1088.73	39.6812	4.778	1.5293e-112	1.8064e-110
PGSC0003DMG400000433	5276.58	657.19	3.0052	2.3185e-112	2.7161e-110
PGSC0003DMG400001932	16066.9	2368.1	2.7623	3.402e-112	3.9691e-110
PGSC0003DMG400019879	846.55	25.0164	5.0806	4.7877e-112	5.5631e-110
PGSC0003DMG400026301	2306.48	126.044	4.1937	3.2282e-111	3.7207e-109
PGSC0003DMG400010661	7128.43	955.127	2.8998	5.7135e-111	6.5326e-109
PGSC0003DMG400014152	27882.7	2110.17	3.7239	1.3365e-110	1.522e-108
PGSC0003DMG400017753	9005.97	1120.08	3.0073	1.9436e-110	2.2046e-108
PGSC0003DMG400015342	3970.3	436.921	3.1838	2.0613e-110	2.3289e-108
PGSC0003DMG400030453	2409.41	234.466	3.3612	2.9453e-110	3.3015e-108
PGSC0003DMG400007359	3913.39	465.299	3.0722	3.072e-110	3.4301e-108
PGSC0003DMG400024895	6628.46	883.403	2.9075	6.1211e-110	6.7816e-108
PGSC0003DMG400016709	2852.49	306.903	3.2164	2.7763e-109	3.0406e-107
PGSC0003DMG400022386	4361.26	343.898	3.6647	5.5283e-109	6.0313e-107
PGSC0003DMG400026006	23324.5	3624.37	2.686	7.3689e-109	8.0089e-107
PGSC0003DMG400006382	4752.56	607.361	2.9681	4.2855e-108	4.6051e-106
PGSC0003DMG400001419	2858.38	306.822	3.2197	9.4815e-108	1.0075e-105
PGSC0003DMG400030902	930.748	39.8117	4.5471	1.8688e-107	1.9784e-105
PGSC0003DMG400001247	3480.58	415.279	3.0672	2.2548e-107	2.3783e-105
PGSC0003DMG400019232	4750.63	463.534	3.3574	2.4903e-107	2.6074e-105
PGSC0003DMG400020335	2458.41	120.13	4.3551	4.2706e-107	4.439e-105
PGSC0003DMG400025377	4831.07	635.907	2.9255	1.3014e-106	1.3478e-104
PGSC0003DMG400007965	7296.76	1018.09	2.8414	1.6916e-106	1.7455e-104
Novel01691	7563.86	280.682	4.7521	1.9213e-106	1.9755e-104
PGSC0003DMG400016284	11908.4	1784.33	2.7385	2.2865e-106	2.3425e-104
PGSC0003DMG402028784	691.258	14.4292	5.5822	2.4192e-106	2.4697e-104
Novel01869	822.13	27.5587	4.8988	2.8418e-106	2.8908e-104
PGSC0003DMG400015281	10452.4	1576.6	2.7289	8.5044e-106	8.6202e-104
PGSC0003DMG400007947	3585.66	439.962	3.0268	1.222e-105	1.2342e-103
PGSC0003DMG400006509	4338.16	554.252	2.9685	1.277e-105	1.2853e-103
PGSC0003DMG400025616	1167.01	70.4857	4.0493	4.0613e-105	4.059e-103
PGSC0003DMG400004800	1770.28	153.261	3.5299	4.5338e-105	4.4998e-103
PGSC0003DMG400024016	1508.38	91.9435	4.0361	6.0919e-105	6.0253e-103
PGSC0003DMG400006995	1259.37	82.7583	3.9277	1.3031e-104	1.2756e-102
PGSC0003DMG400020253	1488.42	113.109	3.718	2.3028e-104	2.2466e-102
PGSC0003DMG400029860	1261.78	83.5545	3.9166	4.1256e-104	4.0111e-102
PGSC0003DMG400033049	707.653	18.6597	5.245	9.2986e-104	8.9794e-102
PGSC0003DMG400014248	14462.6	2280.64	2.6648	9.8327e-104	9.4633e-102
PGSC0003DMG400007019	40457.3	6745.54	2.5844	1.2378e-103	1.1833e-101
PGSC0003DMG400023850	1107.61	65.2008	4.0864	3.1388e-103	2.9906e-101
PGSC0003DMG402007406	741.059	21.3821	5.1151	4.2135e-103	4.0013e-101
PGSC0003DMG400011036	1065.71	60.2693	4.1443	5.7965e-103	5.4863e-101
Novel00296	2782.52	323.611	3.1041	1.7726e-102	1.6558e-100
PGSC0003DMG400012642	3835.75	504.507	2.9266	1.9809e-102	1.8443e-100
PGSC0003DMG400018672	1640.08	145.568	3.494	4.6131e-102	4.2673e-100
PGSC0003DMG400025470	1729.21	158.749	3.4453	5.8209e-102	5.3673e-100
PGSC0003DMG400030698	1119.78	68.2989	4.0352	1.3404e-101	1.228e-99
PGSC0003DMG400023526	1863.74	177.536	3.392	1.8811e-101	1.7179e-99
PGSC0003DMG400005103	1750.12	160.006	3.4513	4.9494e-101	4.4771e-99
PGSC0003DMG400003289	4419.87	575.316	2.9416	5.3871e-101	4.8576e-99
PGSC0003DMG400009961	3510.84	450.523	2.9621	7.7322e-101	6.9502e-99
Novel02218	943.838	47.5031	4.3124	1.2263e-100	1.0919e-98
PGSC0003DMG400009703	758.224	26.0184	4.865	1.2826e-100	1.1385e-98
PGSC0003DMG400025337	1622.32	106.542	3.9286	1.6383e-100	1.4498e-98
PGSC0003DMG400015888	3041.93	372.569	3.0294	2.2334e-100	1.9703e-98
PGSC0003DMG400009699	3885.17	525.019	2.8875	1.4261e-99	1.2428e-97
PGSC0003DMG400021895	1536.93	129.203	3.5723	8.384e-99	7.2401e-97
PGSC0003DMG400000090	3332.78	433.933	2.9412	9.0923e-99	7.8282e-97
PGSC0003DMG401003297	1145.26	72.6179	3.9792	1.0333e-98	8.8698e-97
PGSC0003DMG400001333	770.98	28.2723	4.7692	1.7717e-98	1.5163e-96
Novel02023	3275.63	429.395	2.9314	3.3768e-98	2.8727e-96
PGSC0003DMG400017221	7887.19	1250.63	2.6569	4.437e-98	3.7635e-96
PGSC0003DMG400002099	1504.19	129.745	3.5352	4.5232e-98	3.8252e-96
PGSC0003DMG400011246	33848	5904.36	2.5192	1.2281e-97	1.0325e-95
PGSC0003DMG400010665	1942.53	208.775	3.2179	1.2429e-97	1.0418e-95
PGSC0003DMG400026225	1908.88	197.786	3.2707	1.7094e-97	1.4245e-95
PGSC0003DMG400028448	2287.66	232	3.3017	7.7987e-97	6.4057e-95
PGSC0003DMG400013982	1539.88	138.762	3.4721	8.1003e-97	6.6343e-95
PGSC0003DMG400029390	7507.93	1188.22	2.6596	1.6419e-96	1.3333e-94
PGSC0003DMG400016003	1624.88	68.3513	4.5712	2.2184e-96	1.7862e-94
PGSC0003DMG402001494	25355.7	2685.41	3.2391	2.4449e-96	1.963e-94
PGSC0003DMG400006790	1815.24	82.0199	4.468	3.8224e-96	3.0519e-94
PGSC0003DMG400027919	15681.9	2722.66	2.526	5.5337e-96	4.3816e-94
PGSC0003DMG400025692	1450.55	127.749	3.5052	1.2549e-95	9.8819e-94
PGSC0003DMG400024394	4415.4	659.846	2.7423	1.9133e-95	1.5025e-93
PGSC0003DMG400024081	2810.1	212.486	3.7252	2.348e-95	1.8388e-93
PGSC0003DMG400024849	2138.71	74.0348	4.8524	3.818e-95	2.9656e-93
PGSC0003DMG400032192	4152.98	603.717	2.7822	3.9082e-95	3.0274e-93
PGSC0003DMG400023975	2121.11	156.124	3.7641	5.8404e-95	4.4877e-93
PGSC0003DMG400029837	1388.49	114.054	3.6057	7.5478e-95	5.7841e-93
PGSC0003DMG400002066	4582.07	687.187	2.7372	8.2951e-95	6.3397e-93
PGSC0003DMG400012066	3819.29	547.526	2.8023	1.3157e-94	1.0029e-92
PGSC0003DMG400019315	32445	1833.51	4.1453	1.4631e-94	1.1122e-92
PGSC0003DMG400013649	3953.81	295.499	3.742	2.7105e-94	2.0442e-92
PGSC0003DMG400012571	2487.3	306.574	3.0203	6.273e-94	4.6817e-92
PGSC0003DMG400010165	9054.35	1552.71	2.5438	6.8121e-94	5.0707e-92
PGSC0003DMG400022433	1378.84	124.336	3.4711	1.7932e-93	1.3177e-91
PGSC0003DMG400020391	5372.49	538.296	3.3191	2.2393e-93	1.6413e-91
Novel01240	680.349	23.4711	4.8573	2.4093e-93	1.7568e-91
PGSC0003DMG400025137	8004.04	1334.63	2.5843	2.8995e-93	2.1089e-91
PGSC0003DMG400027632	1349.36	35.4507	5.2503	3.0911e-93	2.2425e-91
PGSC0003DMG400020828	2296.81	126.194	4.1859	3.7544e-93	2.7168e-91
PGSC0003DMG400026384	1560.35	154.095	3.34	1.1971e-92	8.619e-91
PGSC0003DMG400016420	2714.95	261.463	3.3762	2.1924e-92	1.5706e-90
PGSC0003DMG400003964	9112.07	1563.95	2.5426	2.8243e-92	2.0182e-90
PGSC0003DMG400002682	1922.81	209.844	3.1958	2.8477e-92	2.0299e-90
PGSC0003DMG401007406	749.097	33.9708	4.4628	3.3536e-92	2.3786e-90
PGSC0003DMG400016451	1013.01	68.9003	3.878	3.8136e-92	2.6982e-90
PGSC0003DMG400025668	1371.7	38.7294	5.1464	1.929e-91	1.3548e-89
PGSC0003DMG400010819	986.147	66.7814	3.8843	2.1788e-91	1.5265e-89
PGSC0003DMG400001937	2702.6	358.921	2.9126	2.5617e-91	1.7903e-89
PGSC0003DMG400002396	5629.26	640.328	3.1361	3.833e-91	2.6658e-89
PGSC0003DMG400020356	6154.66	1017.56	2.5966	4.7922e-91	3.3167e-89
PGSC0003DMG400012712	2045.98	243.959	3.0681	4.9629e-91	3.4266e-89
PGSC0003DMG400024950	2327.11	299.5	2.9579	1.0676e-90	7.3183e-89
PGSC0003DMG400005641	686.814	27.6866	4.6327	1.3501e-90	9.2324e-89
PGSC0003DMG400024593	770.421	37.913	4.3449	1.7621e-90	1.2021e-88
PGSC0003DMG400027771	8572.12	1502.13	2.5126	2.5008e-90	1.6939e-88
PGSC0003DMG400002790	943.696	53.5246	4.14	3.7596e-90	2.5345e-88
PGSC0003DMG400010509	1182.36	98.317	3.5881	6.3443e-90	4.2569e-88
PGSC0003DMG400020488	9779.26	1734.22	2.4954	1.1647e-89	7.7246e-88
PGSC0003DMG400019728	6096.16	457.258	3.7368	2.2185e-89	1.4645e-87
PGSC0003DMG400021603	17639.2	3341.06	2.4004	3.0759e-89	2.0212e-87
PGSC0003DMG400016892	435.879	3.22103	7.0803	4.0369e-89	2.6465e-87
PGSC0003DMG400009005	1523.92	159.638	3.2549	5.3178e-89	3.4784e-87
PGSC0003DMG400021507	6900.01	1186.52	2.5399	6.5925e-89	4.3023e-87
PGSC0003DMG400008398	5156.22	841.45	2.6154	1.3568e-88	8.8347e-87
PGSC0003DMG400009192	1315.85	123.536	3.413	1.4848e-88	9.624e-87
PGSC0003DMG400004439	1466.14	70.8917	4.3703	2.8485e-88	1.8421e-86
PGSC0003DMG400001228	3600.9	554.557	2.6989	3.1365e-88	2.0238e-86
PGSC0003DMG400024100	2789.08	395.652	2.8175	3.6828e-88	2.371e-86
PGSC0003DMG400031370	1879.28	228.298	3.0412	3.8859e-88	2.496e-86
PGSC0003DMG400003122	10326	1878.85	2.4584	4.7398e-88	3.0378e-86
Novel00351	14617.2	1083.36	3.7541	5.088e-88	3.2536e-86
PGSC0003DMG400028485	683.102	20.1124	5.0859	5.2289e-88	3.3362e-86
PGSC0003DMG400009965	2769.41	169.192	4.0328	5.2801e-88	3.3614e-86
PGSC0003DMG400027156	7587.05	1340.88	2.5004	1.0256e-87	6.4714e-86
PGSC0003DMG400007913	1102	90.7431	3.6022	1.2526e-87	7.8688e-86
PGSC0003DMG400007899	24271.4	4572.39	2.4082	1.8299e-87	1.1445e-85
PGSC0003DMG400026127	1269.13	107.647	3.5595	3.7185e-87	2.3107e-85
PGSC0003DMG400004015	1425.25	151.156	3.2371	5.8459e-87	3.6116e-85
PGSC0003DMG401027186	2970.86	440.045	2.7552	8.0304e-87	4.9258e-85
Novel00852	12938.8	2425.72	2.4152	1.0638e-86	6.4973e-85
PGSC0003DMG400006391	91066.4	7832.71	3.5393	1.3495e-86	8.2249e-85
PGSC0003DMG400020099	1665.3	156.35	3.4129	6.6943e-86	3.9948e-84
PGSC0003DMG400015263	10887.6	1494.07	2.8654	9.3653e-86	5.5654e-84
PGSC0003DMG400024226	2037.54	263.933	2.9486	1.4421e-85	8.5168e-84
PGSC0003DMG400028174	5322.83	916.413	2.5381	1.6137e-85	9.491e-84
PGSC0003DMG400000728	2065.35	267.963	2.9463	2.3714e-85	1.3862e-83
PGSC0003DMG400017154	1499.91	165.865	3.1768	4.0177e-85	2.3389e-83
PGSC0003DMG400043223	705.383	34.2234	4.3654	4.5315e-85	2.622e-83
PGSC0003DMG400028177	11145.5	2121.26	2.3935	5.0367e-85	2.9085e-83
PGSC0003DMG400021164	2697.18	397.218	2.7634	1.177e-84	6.742e-83
PGSC0003DMG400022120	949.181	70.8712	3.7434	1.874e-84	1.0713e-82
PGSC0003DMG400030890	4700.96	811.586	2.5341	3.3894e-84	1.9338e-82
PGSC0003DMG400029263	3099.82	492.381	2.6543	4.5586e-84	2.5854e-82
PGSC0003DMG400019718	26998.6	2495.73	3.4354	6.7807e-84	3.8304e-82
PGSC0003DMG400023343	742.466	42.3813	4.1308	1.0284e-83	5.7754e-82
PGSC0003DMG400014543	4765.38	597.524	2.9955	1.4965e-83	8.3713e-82
PGSC0003DMG400024755	1187.96	103.57	3.5198	1.6515e-83	9.2021e-82
PGSC0003DMG400002645	1980.76	255.449	2.9549	1.8072e-83	1.005e-81
PGSC0003DMG402014344	1903.95	249.82	2.93	2.4413e-83	1.3471e-81
PGSC0003DMG400004404	1311.93	141.425	3.2136	3.4188e-83	1.8793e-81
PGSC0003DMG400027188	505.082	11.9947	5.396	4.7798e-83	2.6224e-81
PGSC0003DMG400023050	5602.98	1000.91	2.4849	5.9119e-83	3.2311e-81
PGSC0003DMG400001408	4520.74	779.374	2.5362	6.983e-83	3.8092e-81
PGSC0003DMG400016503	700.707	37.0539	4.2411	8.4802e-83	4.6083e-81
PGSC0003DMG402003179	2456.01	364.26	2.7533	1.4802e-82	8.0134e-81
PGSC0003DMG400017591	1361.33	144.006	3.2408	2.0835e-82	1.1258e-80
PGSC0003DMG400009530	3046.14	482.413	2.6586	2.1744e-82	1.1727e-80
PGSC0003DMG400010809	18333.6	1077.53	4.0887	2.3074e-82	1.2421e-80
PGSC0003DMG400026113	970.9	81.0606	3.5822	3.0216e-82	1.6235e-80
PGSC0003DMG400029347	1082.92	99.234	3.4479	4.7496e-82	2.5471e-80
PGSC0003DMG400014178	5693.93	1035.73	2.4588	4.8003e-82	2.5695e-80
PGSC0003DMG400005476	724.622	41.675	4.12	5.3797e-82	2.8743e-80
PGSC0003DMG400007288	1264.25	125.479	3.3328	5.4246e-82	2.8929e-80
PGSC0003DMG400021506	3520.05	574.79	2.6145	7.1498e-82	3.8058e-80
PGSC0003DMG400028132	1376.11	148.254	3.2145	8.0778e-82	4.2918e-80
PGSC0003DMG400023359	9250.87	1684.43	2.4573	1.2039e-81	6.3725e-80
PGSC0003DMG400002921	974.465	81.9494	3.5718	2.4275e-81	1.2802e-79
PGSC0003DMG400006989	8031.18	1535.23	2.3872	7.3572e-81	3.8306e-79
PGSC0003DMG401023991	649.629	31.6738	4.3583	7.5641e-81	3.9311e-79
PGSC0003DMG400008021	1427.97	170.109	3.0694	7.9756e-81	4.1375e-79
PGSC0003DMG400019789	1964.84	267.727	2.8756	9.7798e-81	5.0642e-79
PGSC0003DMG400014168	9285.97	1801.15	2.3661	2.1724e-80	1.1209e-78
PGSC0003DMG401029631	11628.7	1136.02	3.3556	2.2672e-80	1.1677e-78
PGSC0003DMG400015468	5681.56	167.152	5.0871	3.2179e-80	1.6514e-78
PGSC0003DMG400005352	1397.39	165.069	3.0816	3.251e-80	1.6653e-78
PGSC0003DMG400023264	3306.66	338.38	3.2887	9.6635e-80	4.915e-78
PGSC0003DMG400017659	2680.68	420.042	2.674	1.0364e-79	5.2621e-78
Novel01985	491.155	12.9992	5.2397	1.1354e-79	5.7541e-78
PGSC0003DMG400025848	1563.6	194.565	3.0065	1.2175e-79	6.1595e-78
PGSC0003DMG400021508	1125.33	103.14	3.4477	1.2371e-79	6.2474e-78
PGSC0003DMG400012138	14608.2	2851.6	2.3569	1.6532e-79	8.3195e-78
PGSC0003DMG400009011	1294.53	147.361	3.135	3.9297e-79	1.9638e-77
PGSC0003DMG400008091	2585.86	287.785	3.1676	4.1888e-79	2.0896e-77
PGSC0003DMG400003916	1098	111.054	3.3056	6.426e-79	3.1889e-77
PGSC0003DMG400009536	835.554	64.1166	3.704	7.9015e-79	3.9008e-77
PGSC0003DMG400015185	703.268	18.314	5.2631	1.6425e-78	8.0808e-77
PGSC0003DMG400002697	624.231	28.7204	4.4419	1.921e-78	9.4346e-77
PGSC0003DMG400002868	3999.33	714.8	2.4841	2.59e-78	1.2677e-76
PGSC0003DMG400001524	8178.9	1632.49	2.3248	6.9169e-78	3.3625e-76
PGSC0003DMG400033031	4578.52	632.713	2.8553	7.9876e-78	3.8698e-76
PGSC0003DMG400027954	1770.8	250.613	2.8209	8.5258e-78	4.1235e-76
PGSC0003DMG400002678	777.282	55.3778	3.8111	9.7001e-78	4.6836e-76
PGSC0003DMG400006972	1805.31	253.843	2.8302	9.983e-78	4.812e-76
PGSC0003DMG400022888	6778.26	921.607	2.8787	1.2909e-77	6.2015e-76
PGSC0003DMG400020906	8073.81	570.295	3.8235	2.6803e-77	1.2791e-75
PGSC0003DMG400001855	1955.57	216.583	3.1746	2.987e-77	1.4207e-75
PGSC0003DMG400001302	2019.37	299.297	2.7543	3.6902e-77	1.7522e-75
PGSC0003DMG400025171	17430.7	876.078	4.3144	4.19e-77	1.9862e-75
PGSC0003DMG400026114	1425.73	179.102	2.9928	4.989e-77	2.361e-75
PGSC0003DMG400002613	17301.8	1176.96	3.8778	7.1381e-77	3.3669e-75
PGSC0003DMG400003036	722.638	48.7231	3.8906	8.9671e-77	4.2227e-75
PGSC0003DMG400001565	2667.85	448.597	2.5722	1.6269e-76	7.6362e-75
PGSC0003DMG402005074	618.962	30.7493	4.3312	1.8889e-76	8.8368e-75
PGSC0003DMG400028374	781.996	55.505	3.8165	2.04e-76	9.5281e-75
PGSC0003DMG401027528	3472.38	610.889	2.5069	2.3085e-76	1.0765e-74
PGSC0003DMG400005933	537.793	21.1092	4.6711	2.5664e-76	1.1947e-74
Novel01866	11481.2	573.402	4.3236	2.888e-76	1.3401e-74
PGSC0003DMG400009475	6132.56	1194.7	2.3598	5.0458e-76	2.3263e-74
PGSC0003DMG402026272	2245.84	352.738	2.6706	5.1521e-76	2.3714e-74
PGSC0003DMG400016649	2868.8	489.313	2.5516	5.1729e-76	2.3772e-74
PGSC0003DMG400011266	2038.12	144.416	3.8189	5.3693e-76	2.4635e-74
PGSC0003DMG400020292	1729.97	239.991	2.8497	1.1017e-75	5.0225e-74
PGSC0003DMG400017176	1627.56	221.768	2.8756	1.1621e-75	5.2894e-74
PGSC0003DMG400019320	4238.16	796.054	2.4125	1.1831e-75	5.3765e-74
PGSC0003DMG400023295	418.918	7.54643	5.7947	1.8726e-75	8.4427e-74
PGSC0003DMG400014101	2833.65	485.1	2.5463	2.8673e-75	1.2886e-73
PGSC0003DMG400021663	5418.79	1060.54	2.3532	3.6851e-75	1.6536e-73
PGSC0003DMG400032242	1185.87	134.885	3.1361	3.8229e-75	1.7127e-73
PGSC0003DMG400021552	2709.73	461.074	2.5551	4.1958e-75	1.8769e-73
PGSC0003DMG400030633	10404.5	2193.18	2.2461	5.5582e-75	2.4786e-73
PGSC0003DMG402013388	1590.17	57.4399	4.791	7.7922e-75	3.4586e-73
PGSC0003DMG400016769	4389.19	389.293	3.495	8.1744e-75	3.6226e-73
PGSC0003DMG400012154	1648.46	120.524	3.7737	9.241e-75	4.0889e-73
PGSC0003DMG400015874	1394.66	171.769	3.0214	1.0833e-74	4.7787e-73
PGSC0003DMG400019816	1197.58	137.462	3.123	1.0954e-74	4.8243e-73
PGSC0003DMG401020908	1839.98	85.9846	4.4195	1.3676e-74	6.005e-73
PGSC0003DMG400011015	534.335	21.1139	4.6615	1.5981e-74	7.0064e-73
PGSC0003DMG400015506	4194.26	789.362	2.4097	1.8022e-74	7.8887e-73
PGSC0003DMG400016813	5536.08	1102.5	2.3281	2.9373e-74	1.2818e-72
PGSC0003DMG400018194	1858.16	277.518	2.7432	4.3997e-74	1.9055e-72
PGSC0003DMG400001388	4686.37	921.862	2.3458	5.9337e-74	2.5621e-72
PGSC0003DMG400016891	515.138	21.6279	4.574	7.5909e-74	3.2727e-72
PGSC0003DMG400032555	6631.94	283.751	4.5467	9.4131e-74	4.0461e-72
PGSC0003DMG400019294	2392.72	173.141	3.7886	1.0124e-73	4.3388e-72
PGSC0003DMG400019432	1838.81	271.607	2.7592	1.0261e-73	4.3909e-72
PGSC0003DMG400021550	3959.38	760.079	2.3811	1.0508e-73	4.4895e-72
PGSC0003DMG400016405	595.48	32.9965	4.1737	1.1802e-73	5.0352e-72
PGSC0003DMG402031759	1120.98	126.873	3.1433	1.2067e-73	5.1405e-72
PGSC0003DMG400035738	2208.83	353.361	2.6441	1.8462e-73	7.8529e-72
PGSC0003DMG400003050	5278.2	1060.14	2.3158	3.6326e-73	1.5383e-71
PGSC0003DMG400000415	1547.01	212.285	2.8654	3.8086e-73	1.6104e-71
PGSC0003DMG400024661	750.159	55.1719	3.7652	4.3822e-73	1.8475e-71
PGSC0003DMG400005779	2090.54	329.594	2.6651	5.5739e-73	2.3465e-71
PGSC0003DMG400010638	2460.6	220.122	3.4826	6.0568e-73	2.546e-71
PGSC0003DMG400024513	1470.13	203.53	2.8526	6.6694e-73	2.7953e-71
PGSC0003DMG400021710	879.658	79.4769	3.4683	1.064e-72	4.4333e-71
PGSC0003DMG400013485	4670.23	675.796	2.7888	2.3739e-72	9.8484e-71
PGSC0003DMG400020365	2081.96	294.938	2.8195	2.5117e-72	1.0405e-70
PGSC0003DMG400007819	2848.16	507.178	2.4895	3.3599e-72	1.3879e-70
PGSC0003DMG400000521	872.989	81.8618	3.4147	3.4975e-72	1.4426e-70
PGSC0003DMG400030839	1097.64	38.6996	4.8259	4.3213e-72	1.7772e-70
PGSC0003DMG400000731	2093.64	330.981	2.6612	5.4769e-72	2.2493e-70
PGSC0003DMG400012215	1688.69	250.546	2.7528	1.0489e-71	4.2892e-70
PGSC0003DMG400001709	2481.66	432.514	2.5205	1.0589e-71	4.3239e-70
PGSC0003DMG400029264	1496.51	211.201	2.8249	1.0975e-71	4.4753e-70
PGSC0003DMG400032141	1956.6	308.984	2.6627	1.1301e-71	4.6017e-70
PGSC0003DMG402021193	2466.66	419.77	2.5549	2.2048e-71	8.9394e-70
Novel02059	1324.26	172.264	2.9425	2.937e-71	1.1874e-69
PGSC0003DMG401013921	1644.29	242.709	2.7602	5.4095e-71	2.1778e-69
PGSC0003DMG400010428	1019.05	110.857	3.2005	8.7372e-71	3.5077e-69
PGSC0003DMG400002388	12455.5	2810.79	2.1477	9.1713e-71	3.6767e-69
PGSC0003DMG400021143	1934.91	291.081	2.7328	1.2986e-70	5.1842e-69
PGSC0003DMG400033060	1386.27	158.252	3.1309	1.346e-70	5.3661e-69
PGSC0003DMG400027176	6443.66	1353.25	2.2515	1.3767e-70	5.4807e-69
Novel00276	13049.3	2973.38	2.1338	1.7341e-70	6.894e-69
PGSC0003DMG400004005	3237.23	605.249	2.4192	1.9282e-70	7.655e-69
PGSC0003DMG400012594	3835.49	752.477	2.3497	2.0734e-70	8.2085e-69
PGSC0003DMG400028752	5323.58	1112.13	2.2591	2.2839e-70	9.0295e-69
PGSC0003DMG400033054	1467.05	209.959	2.8047	2.5522e-70	1.0076e-68
PGSC0003DMG400013886	947.386	97.8836	3.2748	3.0618e-70	1.2072e-68
PGSC0003DMG401028902	648.211	43.7309	3.8897	5.3835e-70	2.1051e-68
PGSC0003DMG400003967	1501.11	216.418	2.7941	1.0716e-69	4.1672e-68
PGSC0003DMG400015214	532.274	29.5304	4.1719	1.2053e-69	4.681e-68
PGSC0003DMG400027155	2742.86	498.682	2.4595	1.3937e-69	5.398e-68
PGSC0003DMG400007552	694.21	31.0097	4.4846	1.4391e-69	5.5663e-68
PGSC0003DMG400014542	2260.99	393.939	2.5209	2.154e-69	8.2756e-68
PGSC0003DMG400026790	2820.14	523.571	2.4293	2.3658e-69	9.0529e-68
PGSC0003DMG400009304	839.071	80.4165	3.3832	2.7539e-69	1.0524e-67
PGSC0003DMG400010097	2243.47	389.683	2.5254	3.3352e-69	1.2728e-67
PGSC0003DMG400029016	5107.5	1080.33	2.2411	4.0382e-69	1.5329e-67
PGSC0003DMG400026821	5088.98	1047.82	2.28	4.8311e-69	1.829e-67
PGSC0003DMG400030546	859.722	73.5769	3.5465	5.7811e-69	2.1858e-67
PGSC0003DMG400008878	1726.63	273.281	2.6595	8.5485e-69	3.2279e-67
PGSC0003DMG400016553	3152.52	365.734	3.1076	8.625e-69	3.2525e-67
PGSC0003DMG401030920	1209.22	41.2766	4.8726	1.0347e-68	3.8967e-67
PGSC0003DMG400021264	11195.3	1296.3	3.1104	1.8738e-68	7.0013e-67
PGSC0003DMG400030703	2608.6	481.899	2.4365	3.3046e-68	1.2283e-66
PGSC0003DMG400012966	1234.84	151.214	3.0297	3.4615e-68	1.2833e-66
PGSC0003DMG400030410	2044.05	350.789	2.5428	4.341e-68	1.6031e-66
PGSC0003DMG400023853	2404.16	440.371	2.4487	5.0406e-68	1.8591e-66
Novel00490	2914.74	564.701	2.3678	6.3123e-68	2.3162e-66
PGSC0003DMG400032814	435.428	12.0171	5.1793	7.0308e-68	2.5732e-66
PGSC0003DMG400025084	561.274	33.3769	4.0718	9.2567e-68	3.3835e-66
PGSC0003DMG400017881	2950.51	568.078	2.3768	9.4672e-68	3.4561e-66
PGSC0003DMG400004087	8808.85	483.842	4.1863	2.3856e-67	8.6206e-66
Novel02719	2179.04	394.975	2.4639	2.6469e-67	9.5528e-66
PGSC0003DMG400003849	4209.48	880.148	2.2578	2.6688e-67	9.6198e-66
PGSC0003DMG400002675	28004.5	6859.54	2.0295	2.711e-67	9.7596e-66
PGSC0003DMG402023373	8606.32	1956.86	2.1369	2.7878e-67	1.0023e-65
PGSC0003DMG400017231	1730.17	33.8331	5.6763	3.2377e-67	1.1612e-65
PGSC0003DMG400018877	1967.3	340.077	2.5323	5.0698e-67	1.816e-65
PGSC0003DMG400011055	4318.84	914.593	2.2394	5.1228e-67	1.8327e-65
PGSC0003DMG400003155	5882.56	272.053	4.4345	7.4037e-67	2.6355e-65
PGSC0003DMG402008903	1142.24	146.972	2.9583	9.4964e-67	3.372e-65
PGSC0003DMG400011326	2430.19	136.182	4.1575	1.1456e-66	4.0525e-65
PGSC0003DMG400017812	2063.16	324.429	2.6689	1.6619e-66	5.8576e-65
PGSC0003DMG400005040	2988.46	593.103	2.333	1.8047e-66	6.3528e-65
PGSC0003DMG400012995	2775.07	532.361	2.382	2.4575e-66	8.6192e-65
PGSC0003DMG400024213	2998.79	597.141	2.3282	2.5335e-66	8.8747e-65
PGSC0003DMG400022181	1626.3	257.097	2.6612	2.6977e-66	9.4268e-65
PGSC0003DMG402028570	752.896	69.5213	3.4369	4.5162e-66	1.5685e-64
PGSC0003DMG400027732	4108.45	864.033	2.2494	4.6334e-66	1.6073e-64
Novel03645	23905.3	5814.01	2.0397	5.3862e-66	1.8662e-64
PGSC0003DMG400001628	5403.34	1189.28	2.1838	5.9576e-66	2.0592e-64
PGSC0003DMG402022253	2121.62	379.767	2.482	5.9988e-66	2.0709e-64
PGSC0003DMG400015499	866.816	89.698	3.2726	6.742e-66	2.3218e-64
PGSC0003DMG400021102	2077.44	79.956	4.6995	8.4299e-66	2.8961e-64
PGSC0003DMG400000077	893.886	99.3516	3.1695	9.0444e-66	3.0998e-64
PGSC0003DMG400015190	3559.37	399.127	3.1567	1.116e-65	3.8112e-64
PGSC0003DMG400014203	1542.06	247.849	2.6373	1.7235e-65	5.8579e-64
PGSC0003DMG401014218	2767.79	539.257	2.3597	2.5257e-65	8.5743e-64
PGSC0003DMG401012679	27090.1	1331.06	4.3471	3.1078e-65	1.0538e-63
PGSC0003DMG400028119	803.735	26.6672	4.9136	3.3554e-65	1.1364e-63
PGSC0003DMG400010084	1970.87	348.775	2.4985	3.4724e-65	1.1746e-63
PGSC0003DMG400011249	456.884	19.2605	4.5681	3.8565e-65	1.3015e-63
PGSC0003DMG402003899	2984.16	601.741	2.3101	3.8631e-65	1.3021e-63
PGSC0003DMG400028929	5710.49	1315.02	2.1185	3.8998e-65	1.313e-63
PGSC0003DMG400008371	2092.17	367.18	2.5104	4.0053e-65	1.3469e-63
PGSC0003DMG400020158	4095.88	873.072	2.23	4.9172e-65	1.6497e-63
PGSC0003DMG400023955	1610.85	269.41	2.5799	6.154e-65	2.0598e-63
PGSC0003DMG400008432	2035.45	364.138	2.4828	7.011e-65	2.3411e-63
PGSC0003DMG400016882	4057.97	865.468	2.2292	7.3091e-65	2.4379e-63
PGSC0003DMG400008580	1222.63	170.219	2.8445	9.7183e-65	3.2264e-63
PGSC0003DMG402020473	447.472	20.12	4.4751	1.4573e-64	4.8155e-63
PGSC0003DMG400026010	1153.15	158.24	2.8654	1.9596e-64	6.4607e-63
PGSC0003DMG400027849	2682.21	526.829	2.348	2.0059e-64	6.6056e-63
PGSC0003DMG400029466	355.375	7.42368	5.5811	2.1415e-64	7.0439e-63
PGSC0003DMG400026523	11049.4	1162.42	3.2488	2.4851e-64	8.1647e-63
PGSC0003DMG400002200	4582.8	1013.75	2.1765	2.9036e-64	9.5181e-63
PGSC0003DMG400010485	2143.2	398.871	2.4258	3.5517e-64	1.1616e-62
PGSC0003DMG400028583	960.383	117.34	3.0329	3.649e-64	1.192e-62
PGSC0003DMG400025214	612.994	46.208	3.7297	4.6101e-64	1.5026e-62
Novel02273	1335.83	53.9676	4.6295	6.6333e-64	2.1571e-62
PGSC0003DMG400014646	2142.36	399.196	2.424	1.0265e-63	3.3228e-62
PGSC0003DMG400026359	6317.12	664.697	3.2485	1.3377e-63	4.3157e-62
PGSC0003DMG400026128	3787.6	809.701	2.2258	1.5126e-63	4.8743e-62
PGSC0003DMG400020266	12872.8	359.232	5.1633	1.8414e-63	5.9272e-62
PGSC0003DMG400019285	2981.96	155.232	4.2638	1.9324e-63	6.1994e-62
PGSC0003DMG400018331	481.818	26.7774	4.1694	2.1348e-63	6.8333e-62
PGSC0003DMG403020240	5853.81	376.279	3.9595	2.348e-63	7.4989e-62
Novel03183	4413.93	835.863	2.4007	3.0031e-63	9.5805e-62
PGSC0003DMG400006836	1735.99	302.129	2.5225	4.0572e-63	1.2929e-61
PGSC0003DMG400035299	496.139	28.1146	4.1414	4.3614e-63	1.3883e-61
PGSC0003DMG400034101	878.662	102.57	3.0987	6.3611e-63	2.0203e-61
PGSC0003DMG400030472	2984.21	466.598	2.6771	6.8819e-63	2.1833e-61
PGSC0003DMG400010315	1790.7	316.122	2.502	7.1123e-63	2.2539e-61
PGSC0003DMG400029803	5359.6	1240.06	2.1117	8.0614e-63	2.5518e-61
PGSC0003DMG400016728	3814.22	842.413	2.1788	8.6449e-63	2.7274e-61
PGSC0003DMG400028137	2713.98	389.663	2.8001	8.8185e-63	2.7791e-61
PGSC0003DMG400020720	500.003	30.0333	4.0573	1.0546e-62	3.3164e-61
PGSC0003DMG400028462	2724.84	553.396	2.2998	1.215e-62	3.8165e-61
PGSC0003DMG400002992	5280.38	1213.94	2.1209	2.0109e-62	6.3026e-61
PGSC0003DMG400026641	8252.81	2014.47	2.0345	2.0986e-62	6.5558e-61
PGSC0003DMG400012657	1350.92	208.107	2.6986	2.473e-62	7.7172e-61
PGSC0003DMG400028117	33877.5	8689.36	1.963	2.5794e-62	8.0404e-61
PGSC0003DMG400000142	2044.1	384.464	2.4105	2.6308e-62	8.1917e-61
PGSC0003DMG400021686	730.532	71.9305	3.3443	3.348e-62	1.0379e-60
PGSC0003DMG400000343	5167.02	1200.56	2.1056	4.0781e-62	1.2602e-60
PGSC0003DMG400008579	7278.62	1373.37	2.4059	5.2784e-62	1.6258e-60
PGSC0003DMG400028395	1398.84	222.413	2.6529	6.8045e-62	2.0914e-60
PGSC0003DMG400004101	23960.4	6167.69	1.9578	7.2468e-62	2.2226e-60
PGSC0003DMG400009051	1478.53	197.589	2.9036	7.3158e-62	2.2413e-60
PGSC0003DMG400004067	3067.62	653.018	2.2319	8.6758e-62	2.6551e-60
PGSC0003DMG400001623	365.796	11.3161	5.0146	8.8181e-62	2.6958e-60
PGSC0003DMG400009472	9818.92	356.29	4.7844	1.0237e-61	3.1228e-60
PGSC0003DMG400012559	4727.29	1101.85	2.1011	1.076e-61	3.2789e-60
PGSC0003DMG400030510	2815.32	577.88	2.2845	1.1713e-61	3.5654e-60
PGSC0003DMG400007849	4147.12	936.475	2.1468	1.1753e-61	3.5738e-60
Novel00172	758.027	77.4931	3.2901	1.4984e-61	4.5515e-60
PGSC0003DMG400016149	1187.81	95.2545	3.6404	1.6839e-61	5.1042e-60
PGSC0003DMG400013108	1790.59	81.6691	4.4545	1.792e-61	5.426e-60
PGSC0003DMG400014223	15870.7	1023.67	3.9545	2.5713e-61	7.7693e-60
PGSC0003DMG400006896	2084.05	401.165	2.3771	2.5862e-61	7.806e-60
PGSC0003DMG400013088	2938.13	499.567	2.5561	3.948e-61	1.1854e-59
PGSC0003DMG400009984	2606.78	536.249	2.2813	5.6408e-61	1.6866e-59
PGSC0003DMG400000890	671.744	62.8112	3.4188	6.8005e-61	2.0291e-59
PGSC0003DMG400001865	442.372	22.1836	4.3177	1.0738e-60	3.1939e-59
PGSC0003DMG401009709	3547.88	785.442	2.1754	1.0776e-60	3.2019e-59
PGSC0003DMG400007337	2620.24	535.193	2.2916	1.0852e-60	3.2211e-59
PGSC0003DMG400004696	14251.8	2569.06	2.4718	1.18e-60	3.4989e-59
PGSC0003DMG400013885	2764.27	579.689	2.2535	1.238e-60	3.667e-59
PGSC0003DMG400016530	4650.2	1087.09	2.0968	1.9035e-60	5.6266e-59
PGSC0003DMG400017100	585.123	46.303	3.6596	2.0647e-60	6.0969e-59
PGSC0003DMG400013975	1065.77	144.642	2.8813	3.6361e-60	1.066e-58
PGSC0003DMG400024266	1791.27	329.454	2.4428	4.6692e-60	1.3675e-58
PGSC0003DMG400024236	4115.34	938.964	2.1319	5.435e-60	1.5869e-58
PGSC0003DMG400012123	659.869	61.3534	3.427	6.0399e-60	1.7617e-58
PGSC0003DMG400011701	709.362	73.8444	3.264	6.46e-60	1.8823e-58
PGSC0003DMG400027702	5552.12	1343.24	2.0473	8.0023e-60	2.3198e-58
PGSC0003DMG400029791	2909.74	636.161	2.1934	8.084e-60	2.3412e-58
PGSC0003DMG400004869	1141.45	174.626	2.7085	1.131e-59	3.2621e-58
PGSC0003DMG400006803	11879	3072.74	1.9508	1.1386e-59	3.2807e-58
PGSC0003DMG400029505	2634.65	237.192	3.4735	1.1613e-59	3.3428e-58
PGSC0003DMG400000398	36191.1	9691.11	1.9009	1.1805e-59	3.3948e-58
PGSC0003DMG400019283	693.351	72.0612	3.2663	1.1991e-59	3.4448e-58
PGSC0003DMG400003213	3018.19	661.675	2.1895	1.2144e-59	3.4852e-58
PGSC0003DMG400033646	2492.67	519.935	2.2613	1.2451e-59	3.5696e-58
PGSC0003DMG400026189	4224.43	983.975	2.1021	1.3645e-59	3.9043e-58
PGSC0003DMG400025400	510.433	17.4627	4.8694	1.4532e-59	4.1538e-58
PGSC0003DMG400016790	5019.04	1208.08	2.0547	1.6026e-59	4.5719e-58
Novel02588	851.965	97.2771	3.1306	1.857e-59	5.2921e-58
PGSC0003DMG400024575	948.37	130.963	2.8563	1.8623e-59	5.3021e-58
PGSC0003DMG400006837	629.809	58.0876	3.4386	2.4091e-59	6.852e-58
PGSC0003DMG402008483	811.798	16.6458	5.6079	3.0912e-59	8.7658e-58
PGSC0003DMG400017223	1253.55	118.535	3.4026	3.55e-59	1.0037e-57
PGSC0003DMG400016221	1658.23	302.384	2.4552	4.2757e-59	1.2065e-57
PGSC0003DMG400002123	904.991	116.698	2.9551	5.6337e-59	1.5834e-57
PGSC0003DMG400009948	10226	2648.03	1.9493	6.8472e-59	1.9226e-57
PGSC0003DMG400015477	529.476	41.4597	3.6748	8.0397e-59	2.253e-57
PGSC0003DMG400016006	756.406	86.6456	3.126	9.1041e-59	2.5463e-57
PGSC0003DMG400012967	985.234	133.143	2.8875	1.0024e-58	2.8008e-57
PGSC0003DMG400000560	645.48	63.3199	3.3496	1.2162e-58	3.3948e-57
PGSC0003DMG400010032	934.556	124.951	2.9029	1.3123e-58	3.6597e-57
PGSC0003DMG400012613	3013.61	657.557	2.1963	1.3463e-58	3.747e-57
PGSC0003DMG400006158	3002.33	658.444	2.189	1.3548e-58	3.7672e-57
Novel02599	469.366	9.95116	5.5597	1.4633e-58	4.0648e-57
PGSC0003DMG400008180	1000.12	56.0169	4.1582	1.5467e-58	4.2924e-57
PGSC0003DMG400007227	2208.98	168.439	3.7131	1.6564e-58	4.5834e-57
PGSC0003DMG400016875	528.25	38.7942	3.7673	1.8175e-58	5.0243e-57
PGSC0003DMG400007178	31326.4	3355.39	3.2228	3.14e-58	8.6469e-57
PGSC0003DMG400011726	3506.45	615.927	2.5092	3.5906e-58	9.878e-57
PGSC0003DMG402000515	1002.28	138.538	2.8549	3.5989e-58	9.8915e-57
PGSC0003DMG400006463	390.862	17.9008	4.4486	4.1e-58	1.1247e-56
PGSC0003DMG400012910	3456.17	793.069	2.1237	4.516e-58	1.2376e-56
PGSC0003DMG400014267	1339.6	46.5163	4.8479	5.3479e-58	1.46e-56
PGSC0003DMG400021460	2895.85	645.141	2.1663	6.6872e-58	1.8204e-56
PGSC0003DMG400017586	1899.76	375.826	2.3377	7.2663e-58	1.9743e-56
Novel01969	1482.61	270.531	2.4543	1.0173e-57	2.7563e-56
PGSC0003DMG400014157	405.582	19.3808	4.3873	1.3919e-57	3.7569e-56
PGSC0003DMG400022268	3228.01	740.15	2.1248	1.4191e-57	3.8268e-56
PGSC0003DMG400003518	275.093	3.46645	6.3103	1.5435e-57	4.1583e-56
PGSC0003DMG400027182	2058.13	420.125	2.2924	1.6293e-57	4.3853e-56
PGSC0003DMG400007506	1192.48	191.171	2.641	1.6819e-57	4.5226e-56
PGSC0003DMG400009926	3100.95	704.365	2.1383	2.6069e-57	6.9771e-56
PGSC0003DMG400023051	1213.5	198.277	2.6136	2.8207e-57	7.5423e-56
PGSC0003DMG400017485	2563.57	560.75	2.1927	2.8992e-57	7.7448e-56
PGSC0003DMG400016037	1190.37	194.302	2.615	3.0632e-57	8.1677e-56
PGSC0003DMG402024761	2159.77	448.582	2.2674	3.9e-57	1.036e-55
PGSC0003DMG400017756	3480.43	190.755	4.1895	4.5449e-57	1.2062e-55
PGSC0003DMG400024749	2732.87	599.272	2.1891	4.7694e-57	1.2646e-55
PGSC0003DMG400001296	1130.91	179.121	2.6585	4.7987e-57	1.2712e-55
PGSC0003DMG400010454	7966.66	2065.24	1.9477	9.7441e-57	2.5623e-55
PGSC0003DMG400016247	827.656	107.241	2.9482	1.2444e-56	3.2694e-55
PGSC0003DMG400009871	8187.27	2109.34	1.9566	1.3788e-56	3.6157e-55
PGSC0003DMG400024934	1056.84	55.6984	4.246	1.7615e-56	4.6151e-55
PGSC0003DMG400014560	361.988	12.8614	4.8148	1.8489e-56	4.8352e-55
PGSC0003DMG400016143	3637.86	872.756	2.0594	2.1559e-56	5.6277e-55
PGSC0003DMG400010728	751.998	90.6579	3.0522	2.2174e-56	5.7779e-55
PGSC0003DMG400008551	21482	5846.25	1.8775	2.5214e-56	6.552e-55
PGSC0003DMG400003369	946.254	134.2	2.8178	2.6008e-56	6.7522e-55
PGSC0003DMG400026854	1019.08	59.6131	4.0955	4.1815e-56	1.0768e-54
PGSC0003DMG400021701	2790.7	628.965	2.1496	4.2196e-56	1.0856e-54
PGSC0003DMG400025796	1976.24	404.164	2.2897	4.922e-56	1.2641e-54
PGSC0003DMG400024617	637.869	65.5964	3.2816	5.2389e-56	1.343e-54
Novel01224	312.66	7.67662	5.348	6.3615e-56	1.6294e-54
PGSC0003DMG400006169	5176.06	1048.41	2.3037	7.0858e-56	1.81e-54
PGSC0003DMG401030861	4445.64	569.073	2.9657	8.0687e-56	2.0574e-54
PGSC0003DMG400030246	828.931	35.3707	4.5506	1.0944e-55	2.788e-54
PGSC0003DMG401006819	1595.34	309.433	2.3662	1.1557e-55	2.9417e-54
PGSC0003DMG400010067	280.628	4.64357	5.9173	1.3652e-55	3.4688e-54
PGSC0003DMG402017414	1762.85	347.342	2.3435	1.3914e-55	3.532e-54
Novel03437	2762.36	633.21	2.1251	1.5519e-55	3.9327e-54
PGSC0003DMG400003067	1037.85	161.97	2.6798	1.5715e-55	3.9787e-54
PGSC0003DMG400021537	846.989	114.805	2.8832	1.5826e-55	4.0032e-54
PGSC0003DMG400002933	2599.4	580.706	2.1623	1.9104e-55	4.8196e-54
PGSC0003DMG400015496	1317.4	233.427	2.4967	2.1095e-55	5.3032e-54
PGSC0003DMG400001464	3049.92	706.769	2.1095	2.1743e-55	5.4614e-54
PGSC0003DMG400030694	7892.09	1256.76	2.6507	2.2999e-55	5.7717e-54
PGSC0003DMG400013834	1870.41	389.537	2.2635	2.3249e-55	5.8294e-54
PGSC0003DMG400022747	1767.65	217.131	3.0252	2.819e-55	7.0496e-54
PGSC0003DMG400018433	1744.16	346.042	2.3335	3.321e-55	8.2906e-54
PGSC0003DMG400017096	3473.19	735.623	2.2392	3.3452e-55	8.3438e-54
PGSC0003DMG400031250	1413.22	191.189	2.8859	3.4937e-55	8.7064e-54
PGSC0003DMG400011106	4694.22	1179.85	1.9923	3.5394e-55	8.8128e-54
PGSC0003DMG400024618	775.825	97.5578	2.9914	4.0092e-55	9.9738e-54
PGSC0003DMG400030812	94072.9	27413.3	1.7789	4.2112e-55	1.0467e-53
PGSC0003DMG401024842	479.425	13.1069	5.1929	4.3154e-55	1.0717e-53
PGSC0003DMG400027052	690.644	80.2286	3.1058	5.2437e-55	1.3011e-53
PGSC0003DMG400025117	651.09	70.2123	3.2131	5.8119e-55	1.4408e-53
PGSC0003DMG400001469	1561.1	293.985	2.4087	6.044e-55	1.4971e-53
PGSC0003DMG400026005	852.777	120.744	2.8202	6.8663e-55	1.6978e-53
PGSC0003DMG400002930	2382.15	149.758	3.9916	7.838e-55	1.9347e-53
PGSC0003DMG400014095	975.776	52.8682	4.2061	7.9103e-55	1.9509e-53
PGSC0003DMG400026360	6074.4	1596.58	1.9278	8.0042e-55	1.9723e-53
PGSC0003DMG400014271	3046.06	721.067	2.0787	8.9404e-55	2.2011e-53
PGSC0003DMG400031099	6111.07	1596.85	1.9362	9.0933e-55	2.2369e-53
PGSC0003DMG400012418	565.152	49.8843	3.502	1.0155e-54	2.4959e-53
PGSC0003DMG400000376	7726.06	2047.66	1.9158	1.0882e-54	2.6701e-53
PGSC0003DMG400026085	1116.21	183.229	2.6069	1.11e-54	2.7212e-53
PGSC0003DMG400007665	1401.22	131.181	3.4171	1.2063e-54	2.9497e-53
PGSC0003DMG400012422	1415.36	261.809	2.4346	1.2998e-54	3.1755e-53
PGSC0003DMG400011811	1896.28	402.684	2.2355	1.3319e-54	3.2513e-53
PGSC0003DMG400015850	1408.05	261.328	2.4298	1.3616e-54	3.3208e-53
PGSC0003DMG400023353	1023.44	110.79	3.2075	1.505e-54	3.6613e-53
PGSC0003DMG400006157	989.609	153.627	2.6874	1.8726e-54	4.5515e-53
PGSC0003DMG400022368	2694.29	628.476	2.1	2.014e-54	4.8911e-53
PGSC0003DMG400019894	388.724	21.5902	4.1703	2.0315e-54	4.9294e-53
PGSC0003DMG400013481	10158	503.058	4.3358	2.0907e-54	5.0687e-53
Novel03270	2010.35	428.868	2.2288	2.4394e-54	5.9042e-53
Novel02355	4929.15	1218.34	2.0164	2.6208e-54	6.3378e-53
PGSC0003DMG400022750	6805.93	1675.59	2.0221	2.8711e-54	6.9256e-53
PGSC0003DMG400031026	5884.02	1548.08	1.9263	2.9556e-54	7.1174e-53
PGSC0003DMG400025882	892.067	67.2372	3.7298	3.5254e-54	8.468e-53
Novel01826	48490	13949.3	1.7975	5.1102e-54	1.2254e-52
PGSC0003DMG400027283	3395.4	118.954	4.8351	6.5738e-54	1.5724e-52
PGSC0003DMG400015909	6348.69	1694.04	1.906	9.4151e-54	2.2483e-52
PGSC0003DMG400017226	27966.4	1418.23	4.3015	9.6355e-54	2.299e-52
Novel03127	16512.9	4663.86	1.824	1.0447e-53	2.4906e-52
PGSC0003DMG400005507	4092.56	617.393	2.7287	1.4392e-53	3.4197e-52
PGSC0003DMG400009025	1029.54	163.883	2.6513	1.5095e-53	3.5837e-52
PGSC0003DMG400015933	1085.55	177.099	2.6158	1.7111e-53	4.059e-52
PGSC0003DMG400003712	6878.08	1850.14	1.8944	1.8177e-53	4.3047e-52
PGSC0003DMG400007067	1449.77	278.325	2.381	1.9521e-53	4.6192e-52
PGSC0003DMG400023326	742.564	95.4015	2.9604	2.0963e-53	4.9563e-52
PGSC0003DMG400017737	1574.58	323.525	2.283	2.8374e-53	6.6806e-52
PGSC0003DMG400006369	7240.49	722.639	3.3247	6.5403e-53	1.5323e-51
PGSC0003DMG400002539	2575.56	609.925	2.0782	7.7165e-53	1.8065e-51
PGSC0003DMG400029022	1307.07	248.31	2.3961	1.0728e-52	2.4972e-51
PGSC0003DMG400006410	540.028	50.1251	3.4294	1.2441e-52	2.8936e-51
PGSC0003DMG401003899	2096.32	466.192	2.1689	1.5001e-52	3.4861e-51
PGSC0003DMG400017824	1718.7	362.534	2.2451	1.7664e-52	4.0983e-51
Novel01916	2698.66	102.375	4.7203	2.2517e-52	5.2116e-51
PGSC0003DMG400003889	5920.21	1484.74	1.9954	2.7505e-52	6.361e-51
PGSC0003DMG400027243	1489.77	295.318	2.3347	2.7622e-52	6.3827e-51
PGSC0003DMG400029164	908.329	141.439	2.683	3.5287e-52	8.1409e-51
PGSC0003DMG400025296	866.973	129.249	2.7458	3.622e-52	8.3494e-51
PGSC0003DMG400027820	934.347	147.207	2.6661	3.9236e-52	9.0372e-51
PGSC0003DMG400011352	5693.5	1537.71	1.8885	3.934e-52	9.0539e-51
PGSC0003DMG400023506	5582.77	236.788	4.5593	4.5872e-52	1.0532e-50
PGSC0003DMG400020384	1036.87	176.562	2.554	4.8051e-52	1.1023e-50
PGSC0003DMG400026944	843.216	23.9319	5.1389	4.8295e-52	1.107e-50
PGSC0003DMG400013406	2921.84	377.621	2.9519	5.2532e-52	1.2032e-50
PGSC0003DMG400016313	331.15	14.4068	4.5227	5.6497e-52	1.2919e-50
Novel00789	319.15	11.887	4.7468	6.2852e-52	1.4361e-50
PGSC0003DMG400031472	500.004	42.596	3.5531	6.4821e-52	1.4799e-50
PGSC0003DMG400021614	1292.99	244.65	2.4019	6.8566e-52	1.5617e-50
PGSC0003DMG400016697	6159.35	1668.8	1.884	8.0168e-52	1.823e-50
PGSC0003DMG400014408	1551.39	327.51	2.244	9.7737e-52	2.2155e-50
PGSC0003DMG400012124	1635.94	333.841	2.2929	1.1299e-51	2.5572e-50
Novel00189	4142.86	1075.68	1.9454	1.5477e-51	3.489e-50
PGSC0003DMG400027634	381.068	23.0353	4.0481	1.9104e-51	4.2965e-50
PGSC0003DMG400030819	2621.31	143.82	4.188	2.0224e-51	4.5447e-50
PGSC0003DMG401018599	2295.98	534.651	2.1024	2.0312e-51	4.5608e-50
PGSC0003DMG400007865	1213.3	221.752	2.4519	2.2921e-51	5.1306e-50
PGSC0003DMG400002703	18099.8	5278.31	1.7778	2.5059e-51	5.6003e-50
PGSC0003DMG400020986	5929.02	806.927	2.8773	2.5316e-51	5.6534e-50
PGSC0003DMG400021116	308.94	12.6738	4.6074	2.5876e-51	5.7739e-50
PGSC0003DMG400012543	888.339	140.558	2.6599	3.0641e-51	6.8319e-50
PGSC0003DMG400030838	883.659	140.02	2.6579	3.192e-51	7.1114e-50
PGSC0003DMG400010228	807.366	118.587	2.7673	3.6628e-51	8.1541e-50
PGSC0003DMG400029694	12808.7	3684.63	1.7975	3.703e-51	8.237e-50
PGSC0003DMG401018740	1324.96	55.9743	4.565	4.0279e-51	8.9459e-50
PGSC0003DMG400004828	18817.6	5527.91	1.7673	4.1416e-51	9.1912e-50
PGSC0003DMG402020339	1898.74	422.376	2.1684	4.9999e-51	1.1087e-49
PGSC0003DMG400016418	1597.04	336.878	2.2451	5.4712e-51	1.2123e-49
PGSC0003DMG400012434	10876.1	1896.86	2.5195	5.8933e-51	1.3038e-49
PGSC0003DMG400007821	18654.8	5486.18	1.7657	6.2851e-51	1.3883e-49
PGSC0003DMG400007634	1818	400.27	2.1833	7.3724e-51	1.626e-49
PGSC0003DMG400023115	1030.22	178.753	2.5269	7.6372e-51	1.6831e-49
Novel02950	3941.2	1034.94	1.9291	9.3372e-51	2.0499e-49
PGSC0003DMG400013068	2825.93	708.675	1.9955	1.0767e-50	2.3566e-49
PGSC0003DMG400029105	1862.87	416.558	2.1609	1.4446e-50	3.1473e-49
PGSC0003DMG402007810	1207.92	226.724	2.4135	1.654e-50	3.5898e-49
PGSC0003DMG400021763	1021.33	75.9685	3.7489	1.9305e-50	4.1867e-49
PGSC0003DMG400006088	898.194	142.862	2.6524	2.3452e-50	5.0824e-49
PGSC0003DMG400032788	571.15	61.9853	3.2039	2.6204e-50	5.67e-49
PGSC0003DMG400023340	4344.45	1156.46	1.9095	3.0694e-50	6.6315e-49
Novel02758	5061.81	1377.24	1.8779	3.2233e-50	6.9536e-49
PGSC0003DMG400008458	1590.95	332.995	2.2563	3.3424e-50	7.1996e-49
PGSC0003DMG400001459	1731.31	165.187	3.3897	3.4795e-50	7.4892e-49
PGSC0003DMG400029262	949.984	160.317	2.567	3.6062e-50	7.7561e-49
PGSC0003DMG400030689	1793.97	396.007	2.1796	3.6423e-50	7.8279e-49
PGSC0003DMG400006857	4580.34	1239.43	1.8858	3.7222e-50	7.9936e-49
PGSC0003DMG400018107	5972.65	1660.88	1.8464	3.9198e-50	8.4116e-49
PGSC0003DMG400016196	411.618	29.6074	3.7973	4.3505e-50	9.315e-49
PGSC0003DMG400020622	5550.84	1281.79	2.1145	4.6442e-50	9.9215e-49
PGSC0003DMG402001316	8758.86	538.379	4.024	4.9722e-50	1.0614e-48
PGSC0003DMG402028027	18166.5	4071.84	2.1575	5.1791e-50	1.1048e-48
PGSC0003DMG400024300	1162.49	213.209	2.4469	6.0766e-50	1.2943e-48
PGSC0003DMG400018043	2876.19	724.751	1.9886	6.821e-50	1.4475e-48
PGSC0003DMG400016140	7879.32	452.463	4.1222	7.3527e-50	1.558e-48
Novel01632	1213.33	232.801	2.3818	7.4719e-50	1.582e-48
PGSC0003DMG400022346	3539.73	588.005	2.5897	7.552e-50	1.5978e-48
PGSC0003DMG400008389	870.562	137.108	2.6666	7.7836e-50	1.6456e-48
PGSC0003DMG400027382	986.419	169.421	2.5416	8.7682e-50	1.8497e-48
PGSC0003DMG400023391	867.003	137.437	2.6573	9.561e-50	2.0139e-48
PGSC0003DMG400022755	2517.2	613.632	2.0364	1.0075e-49	2.1192e-48
PGSC0003DMG400023414	2679.47	663.261	2.0143	1.0537e-49	2.2146e-48
PGSC0003DMG400015407	1911.65	438.782	2.1232	1.0715e-49	2.2503e-48
PGSC0003DMG400026226	4384.03	1126.07	1.961	1.1108e-49	2.3312e-48
PGSC0003DMG400001659	4409.86	1181.7	1.8999	1.1797e-49	2.4722e-48
PGSC0003DMG400025879	1150.09	213.447	2.4298	1.24e-49	2.5947e-48
PGSC0003DMG400030405	21543.5	4694.89	2.1981	1.4412e-49	3.0114e-48
PGSC0003DMG400005612	4586.95	1008.95	2.1847	1.4721e-49	3.0737e-48
PGSC0003DMG400020626	335.968	16.7535	4.3258	1.5645e-49	3.2641e-48
PGSC0003DMG400021659	1228.61	238.802	2.3631	1.7901e-49	3.724e-48
PGSC0003DMG400020517	3385.25	741.4	2.1909	1.8009e-49	3.7437e-48
PGSC0003DMG400009063	6086.34	1702.17	1.8382	1.897e-49	3.9407e-48
PGSC0003DMG400025560	645.981	82.7082	2.9654	2.514e-49	5.2111e-48
PGSC0003DMG400027881	486.932	7.98735	5.9299	3.1228e-49	6.4588e-48
PGSC0003DMG400001096	1103.47	205.771	2.4229	3.3358e-49	6.8944e-48
PGSC0003DMG400018435	896.136	45.9294	4.2862	3.3813e-49	6.9835e-48
PGSC0003DMG400020623	14025.9	4131.71	1.7633	3.5018e-49	7.2271e-48
PGSC0003DMG400005160	2969.53	454.181	2.7089	4.1013e-49	8.4582e-48
PGSC0003DMG400021039	1012.79	178.004	2.5084	4.3663e-49	8.9854e-48
PGSC0003DMG400008375	699.847	95.0606	2.8801	4.9152e-49	1.01e-47
PGSC0003DMG400007258	852.837	133.256	2.6781	5.1395e-49	1.0552e-47
PGSC0003DMG400024623	1406.29	266.26	2.401	5.1425e-49	1.0552e-47
PGSC0003DMG400000046	3174.83	163.612	4.2783	5.2415e-49	1.0748e-47
PGSC0003DMG400028631	3816.35	1011.41	1.9158	5.6009e-49	1.1468e-47
PGSC0003DMG400029794	458.808	41.6022	3.4632	7.8541e-49	1.607e-47
PGSC0003DMG400029476	1115.73	213.343	2.3867	8.4822e-49	1.7318e-47
PGSC0003DMG400023144	2071.45	242.8	3.0928	1.0519e-48	2.1399e-47
PGSC0003DMG400022677	4012.62	106.731	5.2325	1.1158e-48	2.2667e-47
PGSC0003DMG400026476	1593.27	349.063	2.1904	1.2674e-48	2.573e-47
PGSC0003DMG400026945	563.713	20.6107	4.7735	1.316e-48	2.6697e-47
PGSC0003DMG400000843	916.208	153.075	2.5814	1.6105e-48	3.2625e-47
PGSC0003DMG400015383	7228.4	2072.54	1.8023	1.7338e-48	3.5073e-47
PGSC0003DMG400009040	562.798	43.7915	3.6839	2.0446e-48	4.1302e-47
PGSC0003DMG400012276	3414.45	914.109	1.9012	2.1822e-48	4.4051e-47
PGSC0003DMG400005019	1504.39	326.031	2.2061	2.2507e-48	4.5402e-47
PGSC0003DMG400017252	2996.48	769.955	1.9604	2.308e-48	4.6525e-47
PGSC0003DMG400003778	537.553	57.5563	3.2234	2.6331e-48	5.2967e-47
PGSC0003DMG400005162	382.339	27.3108	3.8073	2.8751e-48	5.7712e-47
PGSC0003DMG402005942	470.425	13.9735	5.0732	3.6874e-48	7.3913e-47
PGSC0003DMG400007233	2633.07	112.283	4.5515	4.0661e-48	8.139e-47
PGSC0003DMG400016607	987.141	176.006	2.4876	4.1209e-48	8.2429e-47
PGSC0003DMG400004607	6192.65	1776.32	1.8017	4.7479e-48	9.4839e-47
PGSC0003DMG400023372	1080.3	204.759	2.3994	5.3972e-48	1.0751e-46
PGSC0003DMG400004977	6760.9	1293.44	2.386	7.4098e-48	1.4698e-46
PGSC0003DMG400013196	2288.99	571.831	2.001	9.4079e-48	1.8623e-46
PGSC0003DMG400000161	884.471	146.971	2.5893	9.7931e-48	1.9372e-46
PGSC0003DMG400027051	2651.89	676.763	1.9703	1.0232e-47	2.0225e-46
PGSC0003DMG400004017	2477.61	638.894	1.9553	1.1156e-47	2.2023e-46
PGSC0003DMG400000713	655.936	92.8575	2.8205	1.1662e-47	2.3005e-46
PGSC0003DMG400008950	226.288	3.03305	6.2212	1.4268e-47	2.8107e-46
PGSC0003DMG400014121	1596.94	297.901	2.4224	1.5125e-47	2.9755e-46
PGSC0003DMG400005839	3581.77	960.902	1.8982	1.5709e-47	3.0882e-46
PGSC0003DMG400035743	656.975	93.8194	2.8079	1.6823e-47	3.3026e-46
PGSC0003DMG400030665	4224.18	989.085	2.0945	1.7123e-47	3.3593e-46
PGSC0003DMG400023985	719.999	107.449	2.7443	1.9462e-47	3.8129e-46
PGSC0003DMG400032193	1472.81	322.624	2.1906	2.3432e-47	4.5875e-46
PGSC0003DMG400028213	342.639	19.6839	4.1216	2.3783e-47	4.653e-46
PGSC0003DMG400018635	1769.99	157.412	3.4911	2.4016e-47	4.6923e-46
PGSC0003DMG400003805	5990.25	1460.08	2.0366	2.5951e-47	5.0668e-46
PGSC0003DMG403022314	3442.1	931.39	1.8858	2.6017e-47	5.0727e-46
PGSC0003DMG400015749	1193.84	240.057	2.3142	2.7642e-47	5.3859e-46
PGSC0003DMG400012254	26464.6	8251.27	1.6814	3.2116e-47	6.2533e-46
PGSC0003DMG400010759	253.597	6.5496	5.275	4.0458e-47	7.8616e-46
PGSC0003DMG400022260	2495.06	607.751	2.0375	4.5447e-47	8.8252e-46
PGSC0003DMG401022197	1817.85	269.886	2.7518	5.0589e-47	9.8169e-46
PGSC0003DMG400005163	1623.48	375.225	2.1133	5.9473e-47	1.1517e-45
PGSC0003DMG400019201	2087.33	515.013	2.019	6.0675e-47	1.1742e-45
PGSC0003DMG400004061	2764.22	720.79	1.9392	6.1301e-47	1.1855e-45
PGSC0003DMG400033637	884.498	153.737	2.5244	7.3117e-47	1.4112e-45
PGSC0003DMG400001897	1436.75	311.999	2.2032	7.4994e-47	1.4455e-45
PGSC0003DMG400009183	3347.91	912.208	1.8758	8.04e-47	1.5486e-45
PGSC0003DMG400012655	222.525	3.46645	6.0044	8.9285e-47	1.7174e-45
PGSC0003DMG400015372	2974.61	796.328	1.9013	9.2113e-47	1.7706e-45
PGSC0003DMG400014854	757.975	92.5815	3.0334	1.16e-46	2.2239e-45
PGSC0003DMG400024616	449.6	41.2612	3.4458	1.1804e-46	2.2614e-45
PGSC0003DMG400001444	2672.73	434.123	2.6221	1.1936e-46	2.2852e-45
PGSC0003DMG400010090	1735.47	322.9	2.4262	1.5693e-46	2.9885e-45
Novel01462	637.669	86.4773	2.8824	1.6604e-46	3.1577e-45
PGSC0003DMG402010657	1714.85	397.544	2.1089	1.7668e-46	3.3557e-45
PGSC0003DMG400008907	1037.13	195.328	2.4086	1.8122e-46	3.4396e-45
PGSC0003DMG400002579	1286.63	269.27	2.2565	1.9925e-46	3.7768e-45
PGSC0003DMG400016202	1453.27	328.251	2.1464	2.0863e-46	3.952e-45
PGSC0003DMG400000010	1769.12	423.652	2.0621	2.2237e-46	4.2038e-45
PGSC0003DMG401005194	684.809	98.9604	2.7908	2.5054e-46	4.7301e-45
PGSC0003DMG400025515	1944.28	220.268	3.1419	2.8207e-46	5.3113e-45
PGSC0003DMG400004608	3669.61	1020.74	1.846	2.9313e-46	5.5124e-45
PGSC0003DMG400001147	3174	704.119	2.1724	3.0987e-46	5.8196e-45
PGSC0003DMG400008360	290.216	11.9871	4.5976	4.5818e-46	8.5487e-45
PGSC0003DMG400018922	296.301	15.0432	4.2999	5.4609e-46	1.0162e-44
PGSC0003DMG400021712	662.882	96.6139	2.7784	5.9655e-46	1.1073e-44
PGSC0003DMG400002807	861.759	149.243	2.5296	6.6592e-46	1.2328e-44
PGSC0003DMG400000129	746.055	120.333	2.6323	7.3886e-46	1.367e-44
PGSC0003DMG400006413	1388.94	301.401	2.2042	9.0789e-46	1.6775e-44
PGSC0003DMG400020338	567.369	70.9937	2.9985	1.1339e-45	2.0924e-44
PGSC0003DMG400015162	1775.8	436.499	2.0244	1.1805e-45	2.1771e-44
PGSC0003DMG400017625	8098.8	2446.37	1.7271	1.3545e-45	2.4963e-44
PGSC0003DMG400021676	2425.38	315.78	2.9412	1.3899e-45	2.5598e-44
PGSC0003DMG400019233	1331.37	298.278	2.1582	1.3911e-45	2.5604e-44
PGSC0003DMG400013779	31560.8	10241.9	1.6237	1.4954e-45	2.7488e-44
PGSC0003DMG401017380	4321.4	1237.65	1.8039	1.9212e-45	3.5226e-44
PGSC0003DMG400004984	1574.73	366.861	2.1018	2.2465e-45	4.1164e-44
PGSC0003DMG400003193	437.578	43.1551	3.3419	2.4368e-45	4.462e-44
PGSC0003DMG400017298	324.69	8.78901	5.2072	2.6815e-45	4.8976e-44
PGSC0003DMG400009924	9387.18	2001.11	2.2299	2.7306e-45	4.9841e-44
PGSC0003DMG400026941	4585.87	1327.22	1.7888	3.2306e-45	5.8854e-44
PGSC0003DMG400005217	1253.5	263.068	2.2525	3.2506e-45	5.9182e-44
PGSC0003DMG400002773	2072.71	530.607	1.9658	3.8139e-45	6.9349e-44
PGSC0003DMG400031130	4652.81	1353.07	1.7819	3.8431e-45	6.9835e-44
PGSC0003DMG400029726	1482.82	345.377	2.1021	3.9451e-45	7.1644e-44
PGSC0003DMG400009401	788.78	132.004	2.579	4.0251e-45	7.3049e-44
PGSC0003DMG400008707	603.291	83.139	2.8593	4.369e-45	7.9191e-44
PGSC0003DMG400018364	3076.71	847.364	1.8603	4.5816e-45	8.2991e-44
PGSC0003DMG400019697	2623	661.676	1.987	5.4944e-45	9.9463e-44
PGSC0003DMG400004378	674.699	74.1179	3.1864	6.8942e-45	1.2465e-43
PGSC0003DMG400026982	415.605	36.59	3.5057	7.208e-45	1.3024e-43
PGSC0003DMG400007581	788.265	135.13	2.5443	7.4042e-45	1.337e-43
PGSC0003DMG400023686	4210.23	1214.87	1.7931	7.7867e-45	1.4043e-43
PGSC0003DMG400004440	1414.04	325.135	2.1207	8.7587e-45	1.5766e-43
PGSC0003DMG400022506	1417.36	323.501	2.1314	9.828e-45	1.7646e-43
PGSC0003DMG400029464	300.211	16.7613	4.1628	1.1002e-44	1.973e-43
PGSC0003DMG400007886	591.113	56.342	3.3911	1.11e-44	1.9893e-43
PGSC0003DMG400027372	313.179	17.9808	4.1225	1.1543e-44	2.0661e-43
PGSC0003DMG400030432	875.609	77.9565	3.4895	1.1902e-44	2.129e-43
PGSC0003DMG400008356	2954.58	807.445	1.8715	1.2274e-44	2.1941e-43
PGSC0003DMG400013436	1084.88	133.487	3.0228	1.2354e-44	2.2071e-43
PGSC0003DMG400030422	3166.61	890.877	1.8296	1.4392e-44	2.5694e-43
PGSC0003DMG400012457	825.017	141.842	2.5401	1.7483e-44	3.1135e-43
PGSC0003DMG400022421	2235.8	585.288	1.9336	2.3758e-44	4.2127e-43
PGSC0003DMG400016054	440.07	44.6427	3.3012	2.7029e-44	4.7868e-43
PGSC0003DMG400003988	1188.68	249.508	2.2522	2.8434e-44	5.0295e-43
PGSC0003DMG400005908	815.626	74.5702	3.4512	3.0527e-44	5.393e-43
PGSC0003DMG400017343	820.685	144.555	2.5052	3.3232e-44	5.8673e-43
PGSC0003DMG400004940	334.163	22.2212	3.9105	3.9944e-44	7.0306e-43
PGSC0003DMG400019449	1669.16	399.257	2.0637	4.0164e-44	7.0649e-43
PGSC0003DMG400029948	479.862	54.5837	3.1361	4.7148e-44	8.2832e-43
PGSC0003DMG400008357	571.18	77.0226	2.8906	5.1395e-44	9.0238e-43
PGSC0003DMG400026363	2593.49	107.913	4.587	5.5087e-44	9.6542e-43
PGSC0003DMG400040510	2094.58	547.08	1.9368	6.3101e-44	1.1025e-42
PGSC0003DMG400029430	361.183	28.4002	3.6688	6.513e-44	1.1372e-42
PGSC0003DMG400030212	431.037	28.5155	3.918	6.6414e-44	1.1583e-42
PGSC0003DMG400019398	1330.94	295.776	2.1699	6.7428e-44	1.1752e-42
Novel02498	2878.92	800.408	1.8467	7.1381e-44	1.2434e-42
PGSC0003DMG400016815	1534.26	364.817	2.0723	8.1865e-44	1.4251e-42
PGSC0003DMG400030518	1782.88	446.391	1.9978	9.1477e-44	1.5866e-42
PGSC0003DMG400022199	470.503	53.131	3.1466	9.3736e-44	1.6248e-42
PGSC0003DMG400009219	1458.1	346.161	2.0746	9.7983e-44	1.6964e-42
PGSC0003DMG400008162	737.965	122.351	2.5925	1.1211e-43	1.9364e-42
PGSC0003DMG400022318	773.926	135.441	2.5145	1.2195e-43	2.1049e-42
PGSC0003DMG400023513	1398.16	321.855	2.1191	1.3543e-43	2.3334e-42
PGSC0003DMG400014431	64512.3	21315.9	1.5976	1.4714e-43	2.5336e-42
PGSC0003DMG400030663	1227.03	271.315	2.1771	1.8226e-43	3.1308e-42
PGSC0003DMG400023954	3443.47	997.062	1.7881	1.9959e-43	3.4245e-42
PGSC0003DMG400002190	2438.71	162.018	3.9119	2.0035e-43	3.4355e-42
PGSC0003DMG400006814	8438.63	2654.61	1.6685	2.1323e-43	3.6497e-42
PGSC0003DMG400012848	1374.07	131.033	3.3905	2.2797e-43	3.8997e-42
PGSC0003DMG400007713	665.536	72.975	3.189	2.4963e-43	4.26e-42
PGSC0003DMG400003821	775.143	132.116	2.5527	2.621e-43	4.47e-42
PGSC0003DMG401022314	605.479	87.9628	2.7831	2.6988e-43	4.5973e-42
PGSC0003DMG400023566	8671	2768.12	1.6473	2.7441e-43	4.6717e-42
Novel02201	306.905	18.7248	4.0348	2.7703e-43	4.7135e-42
PGSC0003DMG400023482	2830.08	793.968	1.8337	3.1256e-43	5.3084e-42
PGSC0003DMG400018700	947.066	63.6251	3.8958	3.1441e-43	5.3368e-42
PGSC0003DMG400000711	297.82	17.0642	4.1254	3.1613e-43	5.3627e-42
Novel02005	512.535	63.981	3.0019	3.2255e-43	5.4651e-42
PGSC0003DMG402011559	890.408	168.326	2.4032	3.3629e-43	5.6913e-42
PGSC0003DMG400014324	958.938	190.392	2.3325	3.392e-43	5.7337e-42
PGSC0003DMG400000912	1751.82	434.738	2.0106	3.6754e-43	6.2054e-42
PGSC0003DMG400012903	530.169	69.5665	2.93	3.7372e-43	6.3023e-42
PGSC0003DMG400038720	116301	38817.2	1.5831	4.2139e-43	7.0978e-42
PGSC0003DMG400018823	854.513	159.635	2.4203	4.9015e-43	8.2464e-42
Novel03173	2550.14	705.382	1.8541	5.0257e-43	8.4502e-42
PGSC0003DMG400030683	6916.97	435.29	3.9901	5.4487e-43	9.1454e-42
PGSC0003DMG400010126	1800.54	451.777	1.9947	5.534e-43	9.2832e-42
PGSC0003DMG400010931	1052.71	217.918	2.2722	5.5437e-43	9.2939e-42
PGSC0003DMG400003779	1433.47	336.564	2.0906	5.6226e-43	9.4207e-42
PGSC0003DMG400024271	1069.22	223.503	2.2582	5.7271e-43	9.5901e-42
PGSC0003DMG400015021	344.009	25.5247	3.7525	6.0044e-43	1.0049e-41
PGSC0003DMG400030336	1067.07	215.399	2.3086	6.6232e-43	1.1065e-41
PGSC0003DMG400004642	2495.15	684.568	1.8659	7.1276e-43	1.1886e-41
PGSC0003DMG400009456	2985.33	867.107	1.7836	7.7739e-43	1.2942e-41
PGSC0003DMG400018115	747.18	128.615	2.5384	8.4454e-43	1.4043e-41
PGSC0003DMG400025523	872.562	160.258	2.4449	8.6354e-43	1.4334e-41
PGSC0003DMG400002011	715.307	122.197	2.5494	9.5752e-43	1.5857e-41
PGSC0003DMG400029371	1926.79	265.312	2.8604	9.6135e-43	1.5911e-41
PGSC0003DMG400015434	1255.8	286.808	2.1305	9.8282e-43	1.6257e-41
PGSC0003DMG400007807	2507.85	698.182	1.8448	1.012e-42	1.6731e-41
PGSC0003DMG400022628	2393.83	462.486	2.3718	1.0217e-42	1.6881e-41
PGSC0003DMG400020066	5657.59	1739.05	1.7019	1.0359e-42	1.7106e-41
PGSC0003DMG400013381	1112.06	238.631	2.2204	1.2e-42	1.9782e-41
PGSC0003DMG400008827	419.716	42.9596	3.2884	1.2052e-42	1.9855e-41
PGSC0003DMG400013331	3203.9	779.22	2.0397	1.2826e-42	2.1106e-41
PGSC0003DMG400024886	2838.08	805.625	1.8167	1.2914e-42	2.1239e-41
PGSC0003DMG400003316	7317.26	2297.76	1.6711	1.396e-42	2.2933e-41
PGSC0003DMG400023405	520.398	65.2804	2.9949	1.4896e-42	2.4457e-41
PGSC0003DMG400027769	2470.07	690.912	1.838	1.5095e-42	2.4769e-41
PGSC0003DMG400002624	3872.84	1149.08	1.7529	1.7945e-42	2.9394e-41
PGSC0003DMG400001632	5928.81	1863.76	1.6695	1.9546e-42	3.1981e-41
PGSC0003DMG400025859	1220.16	280.287	2.1221	1.9612e-42	3.207e-41
PGSC0003DMG400033685	4256.53	1279.22	1.7344	2.1016e-42	3.4307e-41
PGSC0003DMG400009777	975.679	200.509	2.2827	2.4694e-42	4.0174e-41
PGSC0003DMG400004951	318.468	9.04179	5.1384	2.4934e-42	4.054e-41
PGSC0003DMG400022866	399.577	39.9993	3.3204	2.6281e-42	4.2683e-41
PGSC0003DMG400009153	1829.19	478.268	1.9353	2.7701e-42	4.4938e-41
PGSC0003DMG401003154	1368.66	320.407	2.0948	2.7843e-42	4.5143e-41
PGSC0003DMG400014390	347.284	27.3106	3.6686	3.0839e-42	4.9944e-41
PGSC0003DMG400024781	1027.09	113.783	3.1742	3.1684e-42	5.1254e-41
PGSC0003DMG400006942	1207.88	270.718	2.1576	3.355e-42	5.4211e-41
PGSC0003DMG400033058	811.851	147.41	2.4614	3.4822e-42	5.6235e-41
Novel01167	231.37	6.74493	5.1003	3.5119e-42	5.6683e-41
PGSC0003DMG400006955	635.675	100.288	2.6641	3.5206e-42	5.6791e-41
PGSC0003DMG400025254	675.665	110.089	2.6176	3.9793e-42	6.4082e-41
PGSC0003DMG400020321	4539.47	212.307	4.4183	4.4858e-42	7.2076e-41
PGSC0003DMG400032147	4612.18	132.581	5.1205	4.5144e-42	7.2494e-41
PGSC0003DMG400000330	1266.52	290.825	2.1226	4.9831e-42	7.9886e-41
Novel03131	7696.94	1023.21	2.9112	5.0122e-42	8.0307e-41
PGSC0003DMG400020601	2215.3	583.635	1.9244	5.0358e-42	8.0641e-41
PGSC0003DMG400025847	750.048	131.252	2.5146	6.3105e-42	1.0088e-40
PGSC0003DMG400000037	1188.58	216.952	2.4538	6.3899e-42	1.0204e-40
PGSC0003DMG402028933	2901.44	841.149	1.7863	6.6554e-42	1.0622e-40
PGSC0003DMG400021628	1913.56	513.063	1.899	6.9866e-42	1.1144e-40
PGSC0003DMG400019897	6010.71	1914.62	1.6505	7.4445e-42	1.1861e-40
PGSC0003DMG400006890	1558.03	204.351	2.9306	8.5978e-42	1.3676e-40
PGSC0003DMG400010072	1309.77	35.3631	5.2109	8.6476e-42	1.3748e-40
Novel00726	2962.39	855.003	1.7928	9.0353e-42	1.4348e-40
PGSC0003DMG400028832	1159.56	222.981	2.3786	9.6216e-42	1.5262e-40
PGSC0003DMG400025374	5674.42	1776.79	1.6752	1.2342e-41	1.9566e-40
PGSC0003DMG400013273	4188.42	1264.64	1.7277	1.3571e-41	2.1502e-40
PGSC0003DMG402002542	1736.52	443.853	1.968	1.3616e-41	2.1563e-40
PGSC0003DMG400028520	1089.32	110.734	3.2982	1.3652e-41	2.1608e-40
PGSC0003DMG400021028	631.882	97.0114	2.7034	1.4431e-41	2.2815e-40
PGSC0003DMG400014173	527.02	62.8766	3.0673	1.4711e-41	2.3232e-40
PGSC0003DMG400018792	1717.67	441.554	1.9598	1.4758e-41	2.3293e-40
PGSC0003DMG400026260	531.025	22.9852	4.53	1.5824e-41	2.4949e-40
PGSC0003DMG400028165	1746.99	279.056	2.6462	1.7082e-41	2.6888e-40
PGSC0003DMG400022337	238.408	6.98292	5.0935	1.882e-41	2.9606e-40
PGSC0003DMG400014694	3121.67	495.949	2.6541	2.0678e-41	3.2493e-40
PGSC0003DMG400002183	7832.72	1792.06	2.1279	2.161e-41	3.3921e-40
PGSC0003DMG400033090	2818.89	792.128	1.8313	2.1916e-41	3.4382e-40
PGSC0003DMG400015606	988.614	206.587	2.2587	2.1931e-41	3.4386e-40
PGSC0003DMG400002350	1284.12	35.9394	5.1591	2.6522e-41	4.1518e-40
PGSC0003DMG401028367	507.678	68.3743	2.8924	2.6995e-41	4.2234e-40
PGSC0003DMG401017590	1828.64	478.877	1.933	2.9165e-41	4.5604e-40
PGSC0003DMG400001856	2089.02	570.38	1.8728	2.9708e-41	4.6429e-40
PGSC0003DMG400002370	2659.73	760.418	1.8064	3.1488e-41	4.9183e-40
PGSC0003DMG400015857	3700.39	1121.15	1.7227	3.1949e-41	4.9876e-40
PGSC0003DMG400026472	862.806	44.4629	4.2784	3.2087e-41	5.0064e-40
PGSC0003DMG400007010	1502.73	376.514	1.9968	3.3397e-41	5.2052e-40
Novel00804	1933.88	516.833	1.9037	3.8023e-41	5.9133e-40
PGSC0003DMG400017175	808.379	150.428	2.426	3.9134e-41	6.0741e-40
PGSC0003DMG400007874	534.198	75.8306	2.8165	4.4839e-41	6.9505e-40
PGSC0003DMG400020781	5067.1	1589.33	1.6727	4.4943e-41	6.9629e-40
PGSC0003DMG400031731	3371.53	253.431	3.7337	5.0321e-41	7.7834e-40
PGSC0003DMG400000723	1137.54	263.824	2.1083	5.1128e-41	7.9039e-40
PGSC0003DMG400022851	1065.04	232.595	2.195	5.5905e-41	8.6285e-40
PGSC0003DMG400003769	896.156	178.512	2.3277	5.9992e-41	9.2493e-40
PGSC0003DMG400012201	678.986	113.632	2.579	6.7896e-41	1.0451e-39
PGSC0003DMG400000513	1041.64	223.796	2.2186	7.6534e-41	1.1762e-39
PGSC0003DMG400006405	615.682	102.09	2.5923	7.7986e-41	1.1978e-39
PGSC0003DMG400028303	446.832	51.7907	3.109	7.8844e-41	1.2104e-39
PGSC0003DMG400005361	23291.8	1292.36	4.1717	7.9202e-41	1.2152e-39
PGSC0003DMG400007122	12171.2	796.278	3.9341	1.1698e-40	1.7872e-39
PGSC0003DMG400015667	1820.13	71.8984	4.6619	1.2101e-40	1.8466e-39
PGSC0003DMG400030551	3369.4	387.976	3.1184	1.2106e-40	1.8466e-39
PGSC0003DMG400001671	947.506	201.05	2.2366	1.2153e-40	1.8528e-39
Novel00338	448.97	45.2064	3.312	1.2492e-40	1.9033e-39
Novel02975	525.223	45.487	3.5294	1.6531e-40	2.5121e-39
PGSC0003DMG400027053	1689.76	81.0686	4.3815	1.8509e-40	2.8081e-39
Novel03415	762.508	143.839	2.4063	1.9022e-40	2.8814e-39
PGSC0003DMG400027745	8204.76	2725.79	1.5898	1.9366e-40	2.932e-39
PGSC0003DMG403030312	2552.74	648.759	1.9763	1.9764e-40	2.9907e-39
PGSC0003DMG400031833	2038.17	549.053	1.8923	2.136e-40	3.2287e-39
PGSC0003DMG400008831	1220.41	289.967	2.0734	2.1705e-40	3.2791e-39
PGSC0003DMG400030164	192.477	3.89985	5.6251	2.1907e-40	3.308e-39
PGSC0003DMG400031758	16648.4	2479.57	2.7472	2.303e-40	3.4756e-39
PGSC0003DMG400007384	447.91	53.0881	3.0768	2.4392e-40	3.6793e-39
PGSC0003DMG400023464	561.475	78.8014	2.8329	2.8617e-40	4.3075e-39
PGSC0003DMG400012982	8871.52	2938.68	1.594	3.268e-40	4.9087e-39
PGSC0003DMG400011140	2478.72	716.365	1.7908	3.5215e-40	5.2868e-39
PGSC0003DMG400024708	7744.54	1886.31	2.0376	3.8078e-40	5.7134e-39
PGSC0003DMG400009821	2489.36	715.109	1.7995	3.8189e-40	5.7272e-39
PGSC0003DMG400011044	1329.38	329.646	2.0118	4.1498e-40	6.2169e-39
PGSC0003DMG400018535	2810.79	835.103	1.7509	4.1596e-40	6.2283e-39
PGSC0003DMG400017895	1794.79	478.752	1.9065	4.2368e-40	6.3405e-39
PGSC0003DMG400003583	887.057	182.53	2.2809	6.5881e-40	9.803e-39
PGSC0003DMG400025035	640.383	106.362	2.5899	6.6631e-40	9.9042e-39
PGSC0003DMG400007963	2483.17	708.648	1.809	6.9674e-40	1.0351e-38
PGSC0003DMG400003537	10218.3	2283.48	2.1619	7.2334e-40	1.0741e-38
PGSC0003DMG400007996	824.036	163.48	2.3336	7.562e-40	1.1223e-38
PGSC0003DMG400009862	1036.92	222.102	2.223	7.6928e-40	1.1411e-38
PGSC0003DMG400015391	2672.13	496.923	2.4269	7.9131e-40	1.1732e-38
PGSC0003DMG401030350	1660.7	349.804	2.2472	8.5483e-40	1.2667e-38
PGSC0003DMG400006622	1358.7	335.147	2.0194	8.6858e-40	1.2864e-38
PGSC0003DMG400024979	1003.77	219.912	2.1904	8.7942e-40	1.3011e-38
PGSC0003DMG400014340	2608.44	417.577	2.6431	8.8304e-40	1.3058e-38
PGSC0003DMG400003958	728.373	81.6315	3.1575	9.1486e-40	1.3514e-38
PGSC0003DMG400011245	1619.45	423.703	1.9344	9.289e-40	1.3715e-38
PGSC0003DMG400025884	1524.79	391.103	1.963	1.0134e-39	1.4947e-38
PGSC0003DMG400025359	1499.6	386.986	1.9542	1.1096e-39	1.6341e-38
Novel03358	1331.26	327.488	2.0233	1.1668e-39	1.7165e-38
PGSC0003DMG400022179	3260.23	440.329	2.8883	1.289e-39	1.8944e-38
PGSC0003DMG400031377	1941.34	539.556	1.8472	1.3529e-39	1.9873e-38
Novel02558	962.04	208.631	2.2051	1.4199e-39	2.0846e-38
PGSC0003DMG400017479	1150.22	266.966	2.1072	1.4292e-39	2.0972e-38
PGSC0003DMG401028646	1287.57	309.048	2.0587	1.4467e-39	2.1218e-38
PGSC0003DMG400005992	633.916	84.4659	2.9078	1.6116e-39	2.36e-38
PGSC0003DMG400028579	2247.88	637.427	1.8182	1.6611e-39	2.4312e-38
PGSC0003DMG400027040	637.436	53.1882	3.5831	1.7139e-39	2.5072e-38
PGSC0003DMG400033071	2833.98	842.577	1.7499	2.0348e-39	2.9705e-38
PGSC0003DMG400011413	715.355	134.524	2.4108	2.2218e-39	3.2402e-38
PGSC0003DMG400011251	680.155	14.4368	5.558	2.2783e-39	3.3208e-38
PGSC0003DMG400000635	1050.61	237.349	2.1462	2.3273e-39	3.3906e-38
PGSC0003DMG400032567	1106.91	255.179	2.117	2.4431e-39	3.5574e-38
PGSC0003DMG400020630	5345.54	1737.59	1.6212	2.6298e-39	3.8274e-38
PGSC0003DMG400009409	245.15	6.54216	5.2278	2.6592e-39	3.8683e-38
PGSC0003DMG400031213	3372.54	1043.24	1.6928	2.8536e-39	4.1446e-38
PGSC0003DMG400015444	924.734	198.297	2.2214	3.5531e-39	5.1475e-38
PGSC0003DMG400026196	968.229	212.661	2.1868	3.6871e-39	5.3363e-38
PGSC0003DMG400027316	13573.9	3002.83	2.1764	4.1161e-39	5.9541e-38
PGSC0003DMG400017151	7678.83	1818.39	2.0782	5.5838e-39	8.0528e-38
PGSC0003DMG401022737	2457.72	711.105	1.7892	5.8351e-39	8.4068e-38
PGSC0003DMG400024071	2073.92	588.378	1.8175	5.9047e-39	8.5027e-38
PGSC0003DMG400029967	599.888	37.6226	3.995	6.1977e-39	8.9157e-38
PGSC0003DMG400012185	1312.13	330.236	1.9903	6.3271e-39	9.0928e-38
PGSC0003DMG400042837	573.674	92.4988	2.6327	6.8064e-39	9.7717e-38
PGSC0003DMG400005404	1292.06	129.856	3.3147	7.0524e-39	1.0115e-37
PGSC0003DMG400012241	1397.28	178.53	2.9684	7.227e-39	1.036e-37
PGSC0003DMG400028234	8461.64	2869.58	1.5601	7.8866e-39	1.1294e-37
PGSC0003DMG400031789	9624.54	2255.63	2.0932	8.1572e-39	1.1676e-37
PGSC0003DMG400017020	415.719	47.7607	3.1217	8.902e-39	1.2723e-37
Novel00688	1750.88	481.41	1.8627	9.7488e-39	1.3926e-37
PGSC0003DMG400016318	1708.96	370.012	2.2075	1.0046e-38	1.4343e-37
PGSC0003DMG400026536	9624.9	698.004	3.7855	1.0715e-38	1.5276e-37
PGSC0003DMG400028826	14382.6	4938.22	1.5423	1.2705e-38	1.8076e-37
PGSC0003DMG400028467	738.37	137.644	2.4234	1.2796e-38	1.8197e-37
PGSC0003DMG400000124	227.733	9.54024	4.5772	1.302e-38	1.8497e-37
PGSC0003DMG400030209	1230.02	301.901	2.0265	1.4738e-38	2.0907e-37
PGSC0003DMG400021209	4003.51	1279.19	1.646	1.573e-38	2.228e-37
Novel01689	1236.82	88.6242	3.8028	1.5995e-38	2.2645e-37
PGSC0003DMG400017601	363.204	36.8508	3.301	1.601e-38	2.2656e-37
PGSC0003DMG400031755	904.856	193.32	2.2267	1.615e-38	2.2842e-37
PGSC0003DMG402029142	454.301	60.4846	2.909	1.6235e-38	2.2951e-37
PGSC0003DMG400022017	2097.3	604.886	1.7938	1.6594e-38	2.3446e-37
PGSC0003DMG400025700	6754.63	2240.92	1.5918	1.6796e-38	2.3709e-37
PGSC0003DMG400020160	1181.58	67.4856	4.13	1.6832e-38	2.3748e-37
PGSC0003DMG400022063	630.421	18.6822	5.0766	1.7056e-38	2.4052e-37
PGSC0003DMG400009394	1028.18	233	2.1417	1.7802e-38	2.5092e-37
PGSC0003DMG400010788	3128.92	961.647	1.7021	1.8667e-38	2.6298e-37
PGSC0003DMG400003304	307.883	25.3547	3.6021	2.0015e-38	2.8182e-37
PGSC0003DMG400027523	959.725	100.296	3.2584	2.0718e-38	2.9115e-37
PGSC0003DMG400000695	1669.19	453.591	1.8797	2.7653e-38	3.8709e-37
PGSC0003DMG400010131	397.93	28.9167	3.7825	2.8257e-38	3.9535e-37
PGSC0003DMG401010657	1292.1	325.071	1.9909	2.846e-38	3.9799e-37
PGSC0003DMG400008553	365.901	20.8335	4.1345	3.0888e-38	4.311e-37
PGSC0003DMG400002487	494.868	18.9354	4.7079	3.0928e-38	4.3146e-37
PGSC0003DMG400005017	572.794	92.7615	2.6264	3.2105e-38	4.4744e-37
PGSC0003DMG400027174	2209.42	215.191	3.36	3.2144e-38	4.4776e-37
PGSC0003DMG400030918	24476.6	939.309	4.7037	3.3299e-38	4.6295e-37
Novel01418	3067.05	963.835	1.67	3.6773e-38	5.1074e-37
PGSC0003DMG400031473	3144.62	516.636	2.6057	3.7997e-38	5.2698e-37
PGSC0003DMG400000893	1409.02	361.262	1.9636	3.8471e-38	5.3329e-37
PGSC0003DMG400025375	2854.93	872.796	1.7097	3.9167e-38	5.4242e-37
PGSC0003DMG400029717	297.302	22.4215	3.729	3.9519e-38	5.4702e-37
PGSC0003DMG400002914	12387.6	4218.04	1.5542	4.0841e-38	5.6506e-37
PGSC0003DMG400029701	4034.24	593.096	2.766	4.1735e-38	5.7715e-37
PGSC0003DMG400046726	920.355	201.167	2.1938	4.1972e-38	5.8014e-37
PGSC0003DMG400004891	3366.8	1077.66	1.6435	4.7498e-38	6.5493e-37
PGSC0003DMG400035836	730.796	143.07	2.3527	5.3085e-38	7.3127e-37
PGSC0003DMG400011772	997.225	230.79	2.1113	5.4526e-38	7.5075e-37
PGSC0003DMG400031262	8728.05	2997.93	1.5417	5.4799e-38	7.5415e-37
PGSC0003DMG400028499	3205.96	518.429	2.6285	5.4926e-38	7.5554e-37
PGSC0003DMG400002085	890.816	157.402	2.5007	5.9561e-38	8.1812e-37
PGSC0003DMG400030941	398.734	46.1804	3.1101	6.4519e-38	8.8537e-37
PGSC0003DMG400028610	2822.46	880.603	1.6804	6.6891e-38	9.1703e-37
PGSC0003DMG400021865	2652.41	789.281	1.7487	6.9708e-38	9.5473e-37
PGSC0003DMG400018236	6766.95	2273.99	1.5733	7.1913e-38	9.84e-37
PGSC0003DMG400023424	14670.9	5112.27	1.5209	7.4648e-38	1.0204e-36
PGSC0003DMG400000922	394.974	15.7367	4.6496	7.5819e-38	1.036e-36
Novel03008	2008.31	571.583	1.813	7.8531e-38	1.0715e-36
PGSC0003DMG400028346	4647.31	1522.57	1.6099	8.3766e-38	1.1423e-36
PGSC0003DMG400027768	3667.17	1166.3	1.6527	8.8683e-38	1.2083e-36
PGSC0003DMG400020105	2626.57	802.502	1.7106	9.5603e-38	1.3013e-36
PGSC0003DMG400017533	945.95	214.324	2.142	9.9007e-38	1.347e-36
PGSC0003DMG400002898	501.418	75.4247	2.7329	1.0105e-37	1.3735e-36
PGSC0003DMG400018567	1188.27	293.452	2.0177	1.0337e-37	1.4043e-36
PGSC0003DMG400006483	1333.13	343.643	1.9558	1.115e-37	1.5134e-36
PGSC0003DMG400030568	5495.43	627.869	3.1297	1.1339e-37	1.5383e-36
PGSC0003DMG400030521	1648.12	305.989	2.4293	1.1742e-37	1.5906e-36
PGSC0003DMG400018322	1466.84	392.589	1.9016	1.182e-37	1.5997e-36
PGSC0003DMG400016390	569.737	92.5157	2.6225	1.3181e-37	1.7816e-36
PGSC0003DMG400017654	480.963	69.4586	2.7917	1.3183e-37	1.7816e-36
PGSC0003DMG400032135	617.648	106.492	2.536	1.3318e-37	1.799e-36
Novel01317	8762.98	3035.4	1.5295	1.5556e-37	2.0975e-36
PGSC0003DMG400026632	1914.12	299.313	2.677	1.6373e-37	2.2055e-36
PGSC0003DMG400014010	385.564	41.6091	3.212	1.6857e-37	2.2696e-36
PGSC0003DMG400030509	2006.21	199.472	3.3302	1.6999e-37	2.2877e-36
PGSC0003DMG400002272	168.792	2.41201	6.1289	1.8006e-37	2.422e-36
PGSC0003DMG400027743	1141.45	273.372	2.0619	1.8075e-37	2.4302e-36
PGSC0003DMG400017317	220.165	8.40546	4.7111	1.8607e-37	2.5005e-36
PGSC0003DMG400012821	1620.44	447.485	1.8565	2.6156e-37	3.5084e-36
PGSC0003DMG400028362	665.858	124.197	2.4226	3.1679e-37	4.2432e-36
PGSC0003DMG400014236	1450.74	109.831	3.7234	3.4677e-37	4.6404e-36
PGSC0003DMG400015622	587.863	102.382	2.5215	3.7098e-37	4.9528e-36
PGSC0003DMG400019743	1098.2	268.404	2.0327	3.9834e-37	5.3107e-36
PGSC0003DMG402018963	3169.09	1002.6	1.6603	4.3445e-37	5.7894e-36
PGSC0003DMG404027324	741.119	148.647	2.3178	4.3639e-37	5.8126e-36
PGSC0003DMG400029325	1840.81	45.8803	5.3263	4.4133e-37	5.8756e-36
PGSC0003DMG400015539	1335.82	351.212	1.9273	4.7049e-37	6.261e-36
PGSC0003DMG400030462	1137.65	107.152	3.4083	4.718e-37	6.2754e-36
PGSC0003DMG400002304	537.165	85.6959	2.6481	5.2579e-37	6.9838e-36
PGSC0003DMG400005862	2174.3	649.316	1.7436	6.0375e-37	7.997e-36
PGSC0003DMG400023440	1402.2	377.065	1.8948	6.0755e-37	8.0437e-36
PGSC0003DMG400004723	6181.3	2085.48	1.5675	6.1834e-37	8.1826e-36
PGSC0003DMG400012073	770.053	115.772	2.7337	6.2653e-37	8.2873e-36
Novel02327	684.413	134.965	2.3423	6.3265e-37	8.3643e-36
PGSC0003DMG400018744	4162.9	171.344	4.6026	7.4566e-37	9.8403e-36
PGSC0003DMG400027890	1247.14	321.026	1.9579	8.0605e-37	1.0613e-35
PGSC0003DMG400024462	544.105	81.5087	2.7389	8.8894e-37	1.1688e-35
PGSC0003DMG402006052	2111.82	624.093	1.7587	8.9373e-37	1.174e-35
PGSC0003DMG400013116	21468.1	7706.25	1.4781	9.5081e-37	1.2467e-35
PGSC0003DMG400001373	190.517	5.43011	5.1328	9.5169e-37	1.2473e-35
PGSC0003DMG400025038	618.988	108.991	2.5057	9.6625e-37	1.2658e-35
PGSC0003DMG401021138	3499.89	1130.06	1.6309	1.0245e-36	1.3397e-35
PGSC0003DMG402003154	1461.7	394.865	1.8882	1.0555e-36	1.3796e-35
PGSC0003DMG400005791	805.609	170.017	2.2444	1.0655e-36	1.392e-35
Novel00528	1965.35	575.146	1.7728	1.0999e-36	1.4349e-35
PGSC0003DMG400023389	629.685	112.808	2.4808	1.1175e-36	1.4572e-35
PGSC0003DMG400016389	1708.97	490.037	1.8022	1.1559e-36	1.5066e-35
PGSC0003DMG400026528	499.232	76.8797	2.699	1.223e-36	1.5926e-35
PGSC0003DMG400024967	670.348	130.181	2.3644	1.3946e-36	1.8128e-35
PGSC0003DMG400024667	3437.68	1103.46	1.6394	1.5447e-36	2.0052e-35
PGSC0003DMG400007129	2037.31	602.005	1.7588	1.5842e-36	2.0546e-35
PGSC0003DMG400010794	4403.31	1288.61	1.7728	1.5842e-36	2.0546e-35
PGSC0003DMG400020564	422.472	11.346	5.2186	1.8123e-36	2.3451e-35
PGSC0003DMG400018921	361.503	39.5006	3.1941	1.9118e-36	2.4705e-35
PGSC0003DMG400003404	1988.92	579.354	1.7795	2.2398e-36	2.8904e-35
PGSC0003DMG400001199	586.943	100.227	2.5499	2.3129e-36	2.9834e-35
PGSC0003DMG400012334	1031.65	253.86	2.0229	2.4224e-36	3.1233e-35
PGSC0003DMG400018338	1107.09	278.553	1.9907	2.5453e-36	3.2803e-35
PGSC0003DMG400017863	1008.8	239.941	2.0719	2.597e-36	3.3453e-35
PGSC0003DMG400011278	2625.99	217.23	3.5956	2.6279e-36	3.3806e-35
PGSC0003DMG400001510	459.166	57.4814	2.9978	2.6304e-36	3.3823e-35
PGSC0003DMG400011238	650.638	121.489	2.421	2.6939e-36	3.4607e-35
PGSC0003DMG400028271	4263.35	1416.75	1.5894	2.7534e-36	3.534e-35
PGSC0003DMG400028787	771.8	67.0922	3.524	2.9728e-36	3.8139e-35
PGSC0003DMG400022038	388.958	46.3907	3.0677	2.9864e-36	3.8297e-35
PGSC0003DMG400026193	1396.77	377.177	1.8888	3.0247e-36	3.877e-35
PGSC0003DMG400014677	1068.39	262.064	2.0274	3.1235e-36	4.0019e-35
Novel02710	1485.49	404.419	1.877	3.2704e-36	4.1882e-35
PGSC0003DMG400016285	1006.09	237.819	2.0808	3.497e-36	4.4684e-35
PGSC0003DMG400034322	267.453	18.9927	3.8158	3.9866e-36	5.085e-35
PGSC0003DMG400000608	616.213	71.7476	3.1024	4.681e-36	5.96e-35
PGSC0003DMG400030630	1381.84	227.033	2.6056	4.8135e-36	6.1259e-35
PGSC0003DMG400001841	4291.94	1458.43	1.5572	5.3292e-36	6.7762e-35
PGSC0003DMG400004746	566.917	99.9051	2.5045	5.5366e-36	7.0368e-35
PGSC0003DMG400003549	1413.81	390.606	1.8558	5.7649e-36	7.3237e-35
PGSC0003DMG400019693	175.386	3.34362	5.713	7.5966e-36	9.608e-35
PGSC0003DMG401027394	2142.69	216.085	3.3097	7.7423e-36	9.7837e-35
PGSC0003DMG400029074	436.486	44.2168	3.3033	9.0806e-36	1.1444e-34
PGSC0003DMG400031313	2912.42	941.956	1.6285	9.709e-36	1.2231e-34
PGSC0003DMG400016270	6369.42	2203.85	1.5311	1.1028e-35	1.3874e-34
PGSC0003DMG400019383	990.57	246.179	2.0086	1.1066e-35	1.3916e-34
Novel01909	318.838	31.0525	3.36	1.1493e-35	1.4441e-34
PGSC0003DMG400005774	195.187	7.47402	4.7068	1.1603e-35	1.4572e-34
PGSC0003DMG400046813	218.787	10.9329	4.3228	1.1689e-35	1.4667e-34
PGSC0003DMG400005896	596.858	112.722	2.4046	1.3295e-35	1.666e-34
PGSC0003DMG400026623	272.537	20.8336	3.7095	1.5062e-35	1.8858e-34
PGSC0003DMG400017678	1134.65	289.513	1.9706	1.6081e-35	2.0108e-34
PGSC0003DMG400021596	307.604	29.2043	3.3968	1.6658e-35	2.0802e-34
PGSC0003DMG400033642	417.487	56.1589	2.8941	1.6681e-35	2.0822e-34
PGSC0003DMG400025608	1383.66	132.345	3.3861	1.7381e-35	2.1676e-34
PGSC0003DMG402018530	522.065	42.829	3.6076	1.7513e-35	2.1822e-34
PGSC0003DMG401016495	5346.76	1480.42	1.8527	1.7937e-35	2.2331e-34
PGSC0003DMG400002387	782.03	151.593	2.367	1.8979e-35	2.3617e-34
PGSC0003DMG400000881	919.941	218.86	2.0715	1.9137e-35	2.3783e-34
PGSC0003DMG400017757	405.601	17.217	4.5582	2.0877e-35	2.5912e-34
PGSC0003DMG400028310	532.534	87.9998	2.5973	2.4566e-35	3.0424e-34
PGSC0003DMG401028570	305.048	22.0908	3.7875	2.8015e-35	3.4651e-34
PGSC0003DMG400003221	2305.76	716.567	1.6861	2.9367e-35	3.6307e-34
PGSC0003DMG400018680	398.242	52.0213	2.9365	3.2822e-35	4.0544e-34
PGSC0003DMG400005144	1563.45	449.547	1.7982	3.2885e-35	4.0604e-34
PGSC0003DMG400012807	1989.42	599.042	1.7316	3.2985e-35	4.071e-34
PGSC0003DMG400004962	7134.54	2144.22	1.7344	3.7342e-35	4.6067e-34
PGSC0003DMG400031235	2585.78	434.535	2.5731	3.8553e-35	4.752e-34
PGSC0003DMG400024824	864.683	204.304	2.0815	4.3107e-35	5.3065e-34
PGSC0003DMG400030543	1017.31	251.332	2.0171	4.3372e-35	5.3368e-34
PGSC0003DMG400023383	1307.06	351.121	1.8963	4.5713e-35	5.62e-34
PGSC0003DMG400008311	953.47	172.084	2.4701	4.6294e-35	5.6891e-34
PGSC0003DMG400009454	1727.39	505.77	1.772	4.7803e-35	5.8695e-34
PGSC0003DMG400036477	2124.56	651.777	1.7047	4.8523e-35	5.9552e-34
PGSC0003DMG400000936	784.066	177.752	2.1411	5.2813e-35	6.4735e-34
PGSC0003DMG400008079	4623.59	1579.68	1.5494	5.4154e-35	6.635e-34
PGSC0003DMG400004704	4208.56	1432.4	1.5549	5.5121e-35	6.7476e-34
PGSC0003DMG400006765	7185.36	635.965	3.498	5.586e-35	6.8322e-34
PGSC0003DMG400003823	1021.17	254.964	2.0019	5.9743e-35	7.3009e-34
PGSC0003DMG400020361	877.833	211.289	2.0547	6.618e-35	8.0772e-34
PGSC0003DMG400009925	1354.15	371.096	1.8675	6.8197e-35	8.3163e-34
PGSC0003DMG400002903	1669.69	493.268	1.7591	7.949e-35	9.6852e-34
PGSC0003DMG400006362	1806.08	541.321	1.7383	8.5819e-35	1.0443e-33
PGSC0003DMG400012528	3356.17	1108.16	1.5987	8.6252e-35	1.0491e-33
PGSC0003DMG400002591	643.715	126.411	2.3483	9.2071e-35	1.1189e-33
PGSC0003DMG400009091	561.544	104.522	2.4256	9.7189e-35	1.1806e-33
PGSC0003DMG400026809	648.164	129.48	2.3236	9.877e-35	1.1988e-33
PGSC0003DMG400027997	3853.15	1310.52	1.5559	1.0342e-34	1.2526e-33
PGSC0003DMG400019279	4406.11	1507.87	1.547	1.0577e-34	1.2805e-33
PGSC0003DMG400007945	3710.79	1259.15	1.5593	1.1093e-34	1.3407e-33
PGSC0003DMG402027355	1486.91	424.981	1.8068	1.29e-34	1.5585e-33
PGSC0003DMG400016324	171.67	4.33309	5.3081	1.3173e-34	1.5901e-33
PGSC0003DMG400015010	4175.26	1438.95	1.5368	1.3742e-34	1.658e-33
PGSC0003DMG400007707	6814.2	2415.17	1.4964	1.6641e-34	2.0053e-33
PGSC0003DMG400030364	465.872	74.2476	2.6495	1.6829e-34	2.0272e-33
PGSC0003DMG400011745	654.676	42.4387	3.9473	1.8112e-34	2.1799e-33
PGSC0003DMG400012151	266.5	14.4643	4.2036	1.8224e-34	2.1924e-33
PGSC0003DMG400015579	218.229	12.4858	4.1275	1.9181e-34	2.3065e-33
PGSC0003DMG400025056	569.333	104.025	2.4523	1.968e-34	2.3646e-33
PGSC0003DMG400006871	2096.45	648.706	1.6923	2.2032e-34	2.6439e-33
Novel00909	607.415	119.78	2.3423	2.2205e-34	2.6635e-33
PGSC0003DMG400018405	1077.75	117.42	3.1983	2.4344e-34	2.9189e-33
PGSC0003DMG400025134	8277.63	1528.61	2.437	2.5912e-34	3.1042e-33
PGSC0003DMG400029087	3829.08	1306.45	1.5513	2.6106e-34	3.1261e-33
PGSC0003DMG402010623	703.59	117.651	2.5802	2.647e-34	3.1684e-33
PGSC0003DMG400001567	4765.56	1657.22	1.5239	2.8683e-34	3.4304e-33
PGSC0003DMG400029594	669.089	138.115	2.2763	2.9179e-34	3.4883e-33
PGSC0003DMG400005914	9271.06	3362.13	1.4634	3.0831e-34	3.6827e-33
PGSC0003DMG400027138	403.802	56.0087	2.8499	3.2297e-34	3.8562e-33
PGSC0003DMG400011624	2333.66	726.348	1.6839	3.3462e-34	3.9919e-33
PGSC0003DMG400025436	2009.97	618.648	1.7	3.3717e-34	4.019e-33
PGSC0003DMG400014273	2151.35	675.494	1.6712	3.601e-34	4.2888e-33
PGSC0003DMG400010319	3289.57	1106.46	1.5719	3.7471e-34	4.459e-33
PGSC0003DMG400018516	1370.24	385.801	1.8285	3.7815e-34	4.4963e-33
PGSC0003DMG400015488	657.283	132.58	2.3097	3.9203e-34	4.6574e-33
PGSC0003DMG400019274	222.811	13.0918	4.0891	3.9248e-34	4.6608e-33
PGSC0003DMG400028732	471.227	77.5188	2.6038	3.9391e-34	4.6759e-33
PGSC0003DMG400002555	605.905	118.018	2.3601	4.4486e-34	5.2763e-33
PGSC0003DMG400021296	1315.26	368.266	1.8365	4.8915e-34	5.7919e-33
PGSC0003DMG400008977	1043.77	273.467	1.9324	4.9874e-34	5.9006e-33
PGSC0003DMG401011139	1120.23	295.612	1.922	5.0005e-34	5.9088e-33
PGSC0003DMG400020209	1382	388.708	1.83	5.12e-34	6.045e-33
Novel01806	572.557	109.576	2.3855	5.6722e-34	6.6859e-33
PGSC0003DMG400030394	487.941	79.379	2.6199	6.7422e-34	7.9308e-33
PGSC0003DMG400002787	274.11	23.7215	3.5305	6.8034e-34	7.9995e-33
PGSC0003DMG401011006	5027.18	1772.27	1.5042	7.0573e-34	8.2946e-33
PGSC0003DMG400012900	1570.43	459.366	1.7734	7.144e-34	8.3931e-33
PGSC0003DMG400033099	316.935	31.3456	3.3379	8.0706e-34	9.4739e-33
Novel02262	208.707	10.6723	4.2895	8.3537e-34	9.7982e-33
PGSC0003DMG400010431	7323.79	2317.96	1.6597	8.4536e-34	9.9114e-33
PGSC0003DMG400009955	281.473	10.3994	4.7584	8.8817e-34	1.0409e-32
Novel03388	1102.35	288.027	1.9363	9.0553e-34	1.0604e-32
PGSC0003DMG400004899	3936.93	1356.62	1.5371	9.4233e-34	1.1021e-32
PGSC0003DMG400019253	1656.38	496.31	1.7387	9.9318e-34	1.1611e-32
PGSC0003DMG400007059	32405	6015.42	2.4295	9.9775e-34	1.166e-32
PGSC0003DMG400018010	3725.67	1279.34	1.5421	1.0331e-33	1.2063e-32
PGSC0003DMG400000776	12282.9	1256.78	3.2888	1.0537e-33	1.2298e-32
PGSC0003DMG400026904	634.874	113.943	2.4782	1.0864e-33	1.2675e-32
PGSC0003DMG400000588	1882.85	582.48	1.6926	1.1133e-33	1.2978e-32
PGSC0003DMG400012605	1431.46	418.48	1.7743	1.1354e-33	1.3231e-32
Novel02979	7590.99	219.735	5.1105	1.1701e-33	1.3624e-32
PGSC0003DMG402023631	2081.62	666.279	1.6435	1.1936e-33	1.3892e-32
PGSC0003DMG400006110	717.196	157.657	2.1856	1.2372e-33	1.4393e-32
PGSC0003DMG402013561	2952.16	1000.36	1.5613	1.2836e-33	1.4915e-32
PGSC0003DMG400022358	930.562	233.745	1.9932	1.3375e-33	1.5528e-32
PGSC0003DMG400004071	840.819	200.809	2.066	1.3678e-33	1.5873e-32
PGSC0003DMG400004318	840.678	201.14	2.0634	1.3692e-33	1.5884e-32
PGSC0003DMG400012564	884.061	218.019	2.0197	1.4252e-33	1.6526e-32
PGSC0003DMG400031291	2728.59	897.633	1.604	1.4438e-33	1.6736e-32
PGSC0003DMG400000181	1274.58	357.153	1.8354	1.4648e-33	1.6965e-32
PGSC0003DMG400007784	410.151	60.3092	2.7657	1.4648e-33	1.6965e-32
PGSC0003DMG400010677	15209.4	5692.61	1.4178	1.5498e-33	1.7913e-32
PGSC0003DMG400031071	5052.64	1785.25	1.5009	1.5518e-33	1.7924e-32
PGSC0003DMG400015607	1136.69	57.3143	4.3098	1.6555e-33	1.9112e-32
PGSC0003DMG400027180	2324.63	67.8463	5.0986	1.8877e-33	2.1775e-32
PGSC0003DMG400009093	1518.39	442.968	1.7773	1.9739e-33	2.276e-32
PGSC0003DMG400014594	241.858	16.4278	3.8799	2.2543e-33	2.5951e-32
PGSC0003DMG400022500	4453.16	1540.84	1.5311	2.5713e-33	2.9564e-32
PGSC0003DMG400025734	1743.13	537.825	1.6965	2.7373e-33	3.1423e-32
PGSC0003DMG400018583	985.494	254.25	1.9546	2.7821e-33	3.1924e-32
PGSC0003DMG400013362	1475.41	437.465	1.7539	2.8173e-33	3.2316e-32
Novel01511	2218.32	708.646	1.6463	2.935e-33	3.3611e-32
PGSC0003DMG400009867	3344.21	1149.01	1.5413	3.1724e-33	3.6315e-32
PGSC0003DMG400025619	1007.64	256.153	1.9759	3.298e-33	3.7738e-32
PGSC0003DMG400011200	263.235	21.4697	3.616	3.3216e-33	3.7977e-32
PGSC0003DMG400000499	1394.17	405.766	1.7807	3.6367e-33	4.1547e-32
PGSC0003DMG400023557	4049.55	1422.01	1.5098	4.2119e-33	4.8023e-32
PGSC0003DMG400027522	2206.22	715.293	1.625	4.9766e-33	5.6628e-32
PGSC0003DMG400009422	1700.08	516.547	1.7186	5.3177e-33	6.0486e-32
PGSC0003DMG400030560	17856.2	6824.78	1.3876	5.4579e-33	6.2007e-32
PGSC0003DMG400007882	5365.76	1939.62	1.468	6.2127e-33	7.0498e-32
PGSC0003DMG400009959	4862.6	715.279	2.7651	6.2253e-33	7.0613e-32
PGSC0003DMG400007488	1816.18	567.682	1.6778	6.7972e-33	7.7008e-32
PGSC0003DMG400015564	1798.61	560.567	1.6819	7.0551e-33	7.9867e-32
PGSC0003DMG400004442	2861.3	970.26	1.5602	7.4421e-33	8.4214e-32
PGSC0003DMG400020618	1398.77	92.5481	3.9178	7.6622e-33	8.6636e-32
PGSC0003DMG400026427	3025.65	1035.93	1.5463	9.0018e-33	1.0166e-31
PGSC0003DMG400020460	2627.38	870.242	1.5941	9.292e-33	1.049e-31
PGSC0003DMG400017255	771.366	182.172	2.0821	9.6944e-33	1.0931e-31
PGSC0003DMG400027150	3002.6	1001.49	1.5841	9.7668e-33	1.1008e-31
PGSC0003DMG400033921	1260.11	324.3	1.9581	1.0663e-32	1.2009e-31
PGSC0003DMG400002796	2285.35	572.969	1.9959	1.0803e-32	1.2162e-31
PGSC0003DMG400019711	1142.14	307.725	1.892	1.1075e-32	1.2463e-31
PGSC0003DMG400030411	949.247	247.421	1.9398	1.1175e-32	1.257e-31
PGSC0003DMG400022950	458.995	76.6394	2.5823	1.1317e-32	1.2725e-31
PGSC0003DMG400021912	272.934	26.6321	3.3573	1.1324e-32	1.2729e-31
PGSC0003DMG400004427	769.574	163.993	2.2304	1.2043e-32	1.3531e-31
PGSC0003DMG400014809	404.861	61.7646	2.7126	1.2607e-32	1.416e-31
PGSC0003DMG400027065	462.07	76.2208	2.5999	1.2882e-32	1.4463e-31
PGSC0003DMG400010049	2867.06	399.704	2.8426	1.4605e-32	1.6377e-31
PGSC0003DMG400013714	6168.75	2266.16	1.4447	1.4835e-32	1.6629e-31
PGSC0003DMG400002045	170.245	5.51028	4.9493	1.5561e-32	1.7422e-31
PGSC0003DMG400022408	807.252	195.051	2.0492	1.577e-32	1.765e-31
PGSC0003DMG400022402	1752.42	58.9494	4.8937	1.6685e-32	1.8652e-31
PGSC0003DMG400001770	1209.92	339.232	1.8346	1.6996e-32	1.8992e-31
PGSC0003DMG400002337	385.614	52.7347	2.8703	1.8861e-32	2.1068e-31
PGSC0003DMG400006908	397.039	12.0674	5.0401	1.9975e-32	2.2304e-31
PGSC0003DMG402027394	1369.94	136.077	3.3316	2.0027e-32	2.2353e-31
PGSC0003DMG400015361	1128.47	306.977	1.8782	2.0598e-32	2.2981e-31
PGSC0003DMG400010530	1214.21	344.745	1.8164	2.0712e-32	2.3099e-31
PGSC0003DMG400001454	1906.06	443.83	2.1025	2.2397e-32	2.4949e-31
PGSC0003DMG400005786	1857.68	586.341	1.6637	2.2452e-32	2.5001e-31
PGSC0003DMG400022815	218.852	14.8753	3.879	2.3337e-32	2.5976e-31
PGSC0003DMG400004124	6184.49	1348.29	2.1975	2.3753e-32	2.6429e-31
PGSC0003DMG400031791	211.697	12.5007	4.0819	2.3781e-32	2.645e-31
PGSC0003DMG400010557	8346.28	2317.76	1.8484	2.5697e-32	2.8548e-31
Novel02312	2046.33	656.12	1.641	2.6194e-32	2.9089e-31
PGSC0003DMG400003228	249.262	3.84215	6.0196	2.6593e-32	2.9519e-31
PGSC0003DMG400026132	221.223	13.1141	4.0763	2.6687e-32	2.9613e-31
Novel01266	756.93	168.018	2.1715	3.0394e-32	3.3634e-31
PGSC0003DMG402016396	1896.91	602.25	1.6552	3.1421e-32	3.4757e-31
PGSC0003DMG400030466	773.849	187.984	2.0414	3.2214e-32	3.5607e-31
PGSC0003DMG401012244	642.354	72.0156	3.157	3.414e-32	3.7707e-31
PGSC0003DMG400016803	678.526	148.893	2.1881	3.4471e-32	3.8058e-31
PGSC0003DMG400030399	1060.48	284.866	1.8964	3.7255e-32	4.11e-31
PGSC0003DMG401003285	3375.18	1175.19	1.5221	3.94e-32	4.3399e-31
PGSC0003DMG400024889	2120.86	698.032	1.6033	4.0656e-32	4.4765e-31
PGSC0003DMG400000561	1201.95	336.273	1.8377	4.4622e-32	4.9094e-31
PGSC0003DMG400019907	710.979	161.236	2.1406	4.5916e-32	5.0479e-31
PGSC0003DMG400000602	3584.77	1258.47	1.5102	4.6733e-32	5.1338e-31
PGSC0003DMG400018234	7552.85	2804.72	1.4292	4.7044e-32	5.166e-31
PGSC0003DMG400003707	17956.1	6951.27	1.3691	4.7225e-32	5.1838e-31
PGSC0003DMG400005154	1272.21	173.044	2.8781	4.8023e-32	5.2674e-31
PGSC0003DMG400030832	4032.5	1431.52	1.4941	4.8497e-32	5.3153e-31
PGSC0003DMG400016441	2409.6	78.0528	4.9482	4.8994e-32	5.3677e-31
PGSC0003DMG400023815	678.751	60.6297	3.4848	5.2896e-32	5.7863e-31
PGSC0003DMG400014260	328.539	36.4324	3.1728	5.4597e-32	5.9656e-31
PGSC0003DMG402028252	10223.9	325.168	4.9746	5.9284e-32	6.4704e-31
PGSC0003DMG400023695	1664.52	525.758	1.6626	5.9507e-32	6.4921e-31
PGSC0003DMG400001624	587.36	44.5928	3.7194	5.9986e-32	6.542e-31
PGSC0003DMG400020039	1312.46	388.078	1.7579	6.0813e-32	6.6296e-31
PGSC0003DMG400030438	5406.04	634.583	3.0907	6.2182e-32	6.7763e-31
PGSC0003DMG401021549	21050.2	2499.3	3.0742	6.3879e-32	6.9585e-31
Novel03483	2170.84	712.079	1.6081	6.8541e-32	7.4607e-31
PGSC0003DMG400017515	2111	691.764	1.6096	6.9094e-32	7.518e-31
PGSC0003DMG400027742	269.753	24.1695	3.4804	6.9309e-32	7.5386e-31
PGSC0003DMG400019626	581.785	121.009	2.2654	7.3378e-32	7.975e-31
PGSC0003DMG400002565	706.24	164.435	2.1026	7.947e-32	8.6241e-31
PGSC0003DMG400000566	3810.07	1355.81	1.4907	8.0494e-32	8.7318e-31
PGSC0003DMG400013335	938.228	246.879	1.9261	8.1668e-32	8.8559e-31
PGSC0003DMG400012305	248.895	21.7806	3.5144	8.2894e-32	8.9853e-31
PGSC0003DMG400020225	610.027	126.291	2.2721	8.5318e-32	9.2447e-31
Novel01746	2150.03	707.555	1.6034	8.7274e-32	9.453e-31
PGSC0003DMG400021254	9094.8	3469.78	1.3902	8.9688e-32	9.7107e-31
PGSC0003DMG400004860	3343.87	428.161	2.9653	9.0456e-32	9.7902e-31
PGSC0003DMG400011633	403.5	20.0848	4.3284	9.3165e-32	1.0076e-30
PGSC0003DMG402015684	5848.07	2158.42	1.438	9.797e-32	1.0575e-30
PGSC0003DMG402009727	2285.99	205.934	3.4726	1.124e-31	1.2119e-30
PGSC0003DMG400016715	785.71	192.228	2.0312	1.1264e-31	1.2141e-30
PGSC0003DMG400001630	28535.5	11187.2	1.3509	1.1332e-31	1.2209e-30
PGSC0003DMG400024765	230.463	17.6203	3.7092	1.2807e-31	1.3783e-30
PGSC0003DMG400030062	1649.15	515.52	1.6776	1.2983e-31	1.3967e-30
PGSC0003DMG400005155	6656.72	2052.6	1.6974	1.3301e-31	1.4298e-30
PGSC0003DMG401007403	3822.81	1376.41	1.4737	1.3843e-31	1.4864e-30
PGSC0003DMG400028304	1109.75	307.576	1.8512	1.436e-31	1.5413e-30
PGSC0003DMG400018618	2434.03	828.788	1.5543	1.4467e-31	1.5523e-30
PGSC0003DMG400013918	3789.93	1358.16	1.4805	1.5066e-31	1.6159e-30
PGSC0003DMG400017652	768.981	185.658	2.0503	1.5667e-31	1.6785e-30
Novel01659	2517.8	857.956	1.5532	1.6611e-31	1.7783e-30
PGSC0003DMG400028675	4819.82	411.315	3.5507	1.7071e-31	1.8269e-30
PGSC0003DMG400019215	3887.19	1392.71	1.4808	1.9052e-31	2.035e-30
PGSC0003DMG400030439	3766.84	1338.29	1.493	1.9611e-31	2.094e-30
PGSC0003DMG401002659	1454.13	438.061	1.7309	2.1499e-31	2.2921e-30
PGSC0003DMG400009782	360.225	51.7035	2.8006	2.1764e-31	2.3187e-30
PGSC0003DMG400042273	2019.89	675.637	1.58	2.3711e-31	2.5233e-30
PGSC0003DMG400006310	2405.79	817.146	1.5578	2.7102e-31	2.8724e-30
PGSC0003DMG400020294	2724.66	938.765	1.5372	2.7725e-31	2.9373e-30
PGSC0003DMG400006417	564.153	117.465	2.2639	2.968e-31	3.141e-30
PGSC0003DMG400021439	399.041	61.1355	2.7065	2.9883e-31	3.1613e-30
PGSC0003DMG400033079	2298.95	776.315	1.5663	3.2291e-31	3.4148e-30
PGSC0003DMG400013186	2123.37	706.255	1.5881	3.2651e-31	3.4503e-30
PGSC0003DMG400021441	939.505	241.683	1.9588	3.2712e-31	3.4544e-30
PGSC0003DMG400009282	1607.27	507.028	1.6645	3.2714e-31	3.4544e-30
PGSC0003DMG402012803	407.422	33.6152	3.5993	3.3264e-31	3.5111e-30
PGSC0003DMG400004253	277.667	17.1216	4.0195	3.3352e-31	3.5191e-30
PGSC0003DMG400023977	2944.41	1023.85	1.524	3.5184e-31	3.7096e-30
PGSC0003DMG400029754	164.214	4.83138	5.087	3.53e-31	3.7192e-30
Novel01970	129.918	1.23481	6.7172	3.6762e-31	3.8689e-30
PGSC0003DMG400002601	5089.68	1890.92	1.4285	3.7374e-31	3.9319e-30
PGSC0003DMG400030451	1863.31	602.178	1.6296	3.786e-31	3.9816e-30
PGSC0003DMG400008472	17260.5	1693.34	3.3495	3.8948e-31	4.093e-30
PGSC0003DMG400006403	3787.72	1377.75	1.459	3.9594e-31	4.1593e-30
PGSC0003DMG400003725	5866.62	2198.33	1.4161	4.1456e-31	4.3517e-30
PGSC0003DMG400014166	1780.81	574.167	1.633	4.2599e-31	4.4685e-30
PGSC0003DMG400005143	1003.31	223.639	2.1655	4.7545e-31	4.9799e-30
PGSC0003DMG400026323	312.597	39.774	2.9744	5.0986e-31	5.3345e-30
PGSC0003DMG400014627	30327.3	7519.99	2.0118	5.1042e-31	5.3384e-30
PGSC0003DMG400010025	505.576	49.5645	3.3505	5.2719e-31	5.5098e-30
PGSC0003DMG400013638	4487.43	1639.38	1.4527	5.3302e-31	5.5686e-30
PGSC0003DMG400017510	1996.02	651.42	1.6155	5.3686e-31	5.6068e-30
Novel02889	345.344	48.5401	2.8308	5.3883e-31	5.6252e-30
Novel01808	911.142	39.1757	4.5396	5.4605e-31	5.6944e-30
PGSC0003DMG400008676	2305.76	729.183	1.6609	5.6878e-31	5.9292e-30
PGSC0003DMG400025065	1931.16	634.581	1.6056	5.7445e-31	5.9861e-30
PGSC0003DMG400024958	1917.01	631.423	1.6022	6.017e-31	6.2656e-30
PGSC0003DMG400014624	1988.77	660.569	1.5901	6.3241e-31	6.583e-30
PGSC0003DMG400016731	2338.26	797.963	1.551	6.5518e-31	6.815e-30
PGSC0003DMG400025902	483.764	90.1544	2.4238	6.8549e-31	7.1251e-30
PGSC0003DMG400013514	5550.93	2056.83	1.4323	6.9886e-31	7.2615e-30
PGSC0003DMG401011001	1375.91	421.816	1.7057	7.0247e-31	7.2963e-30
PGSC0003DMG400020422	21080.2	8344.09	1.3371	7.5285e-31	7.8167e-30
PGSC0003DMG400006991	2236.71	682.118	1.7133	7.7475e-31	8.0383e-30
PGSC0003DMG400004534	331.61	28.7784	3.5264	7.7738e-31	8.0621e-30
PGSC0003DMG400002789	6802.7	456.95	3.896	7.8121e-31	8.0964e-30
PGSC0003DMG400031007	5981.39	2252.05	1.4092	7.9161e-31	8.2013e-30
PGSC0003DMG400005957	1150.8	331.919	1.7937	8.1364e-31	8.4235e-30
PGSC0003DMG400019578	1178.51	335.176	1.814	8.8515e-31	9.1571e-30
PGSC0003DMG400016655	826.675	210.639	1.9725	9.0762e-31	9.3828e-30
PGSC0003DMG400017309	303.017	7.48154	5.3399	9.3538e-31	9.6628e-30
PGSC0003DMG400023147	1135.94	91.0989	3.6403	9.4558e-31	9.7646e-30
PGSC0003DMG400004851	802.837	201.059	1.9975	9.5433e-31	9.8478e-30
PGSC0003DMG401018530	2335.3	612.328	1.9312	1.02e-30	1.0522e-29
PGSC0003DMG402029824	860.236	161.157	2.4163	1.0296e-30	1.0617e-29
PGSC0003DMG400012589	192.854	10.9479	4.1388	1.0633e-30	1.0961e-29
PGSC0003DMG400010556	3280.14	1183.03	1.4713	1.0894e-30	1.1225e-29
PGSC0003DMG400024805	631.067	141.241	2.1596	1.092e-30	1.1248e-29
PGSC0003DMG400012789	671.174	151.184	2.1504	1.1026e-30	1.1349e-29
PGSC0003DMG400030928	32929.4	6084.95	2.4361	1.114e-30	1.1462e-29
PGSC0003DMG400005106	2237.22	771.464	1.536	1.1898e-30	1.2238e-29
PGSC0003DMG400021091	941.897	256.6	1.876	1.2396e-30	1.2732e-29
PGSC0003DMG401014396	3869.89	1418.48	1.4479	1.2741e-30	1.3076e-29
PGSC0003DMG400016412	4556.82	1687.81	1.4329	1.2781e-30	1.3113e-29
PGSC0003DMG400026211	3035.95	862.699	1.8152	1.308e-30	1.3415e-29
PGSC0003DMG400022311	564.844	71.2696	2.9865	1.3388e-30	1.3721e-29
PGSC0003DMG400001923	2054.15	151.977	3.7566	1.4556e-30	1.4907e-29
PGSC0003DMG400004351	1248.83	375.127	1.7351	1.6981e-30	1.7348e-29
PGSC0003DMG402032203	4101.53	1125.12	1.8661	1.839e-30	1.878e-29
PGSC0003DMG400022852	3498.87	1225.64	1.5134	2.0037e-30	2.044e-29
PGSC0003DMG400023971	534.432	108.686	2.2978	2.0312e-30	2.0706e-29
PGSC0003DMG400024220	4231.79	1580.48	1.4209	2.0635e-30	2.1028e-29
PGSC0003DMG400024596	521.854	99.2001	2.3952	2.0839e-30	2.1228e-29
PGSC0003DMG400011902	111.806	0	Inf	2.1383e-30	2.1767e-29
PGSC0003DMG400026565	8383.74	3275.49	1.3559	2.1648e-30	2.2028e-29
Novel00377	245.193	5.30735	5.5298	2.2058e-30	2.243e-29
PGSC0003DMG400009873	7082.65	2717.68	1.3819	2.2271e-30	2.2638e-29
PGSC0003DMG402020908	2084.87	227.729	3.1946	2.2339e-30	2.27e-29
PGSC0003DMG400020757	6549.64	1127.71	2.538	2.248e-30	2.2835e-29
PGSC0003DMG400025336	510.703	99.1606	2.3646	2.3192e-30	2.3533e-29
PGSC0003DMG400009825	442.13	27.0224	4.0322	2.6027e-30	2.6362e-29
PGSC0003DMG400002189	1527.16	477.637	1.6769	2.6132e-30	2.6459e-29
PGSC0003DMG400027766	1165.17	346.459	1.7498	2.7856e-30	2.8165e-29
PGSC0003DMG400030229	441.612	68.2535	2.6938	2.9001e-30	2.9313e-29
PGSC0003DMG400009912	4801.64	1794.71	1.4198	3.0801e-30	3.1099e-29
PGSC0003DMG400026281	2421.89	475.518	2.3486	3.1419e-30	3.1701e-29
PGSC0003DMG400026050	2575.86	901.158	1.5152	3.3018e-30	3.3278e-29
PGSC0003DMG400029372	1280.38	383.043	1.741	3.4031e-30	3.4288e-29
PGSC0003DMG400010999	384.233	60.1888	2.6744	3.4097e-30	3.4343e-29
Novel03366	6914.41	2687.14	1.3635	3.7069e-30	3.7296e-29
Novel03611	1166.46	340.276	1.7774	3.7314e-30	3.753e-29
PGSC0003DMG400003867	1461.55	459.725	1.6687	3.7586e-30	3.779e-29
Novel03303	1263.32	382.134	1.7251	3.8391e-30	3.8586e-29
PGSC0003DMG400013268	576.787	121.68	2.245	4.0982e-30	4.1175e-29
PGSC0003DMG400026831	1337.62	416.441	1.6835	4.1702e-30	4.1879e-29
PGSC0003DMG400012577	19758.9	7869.17	1.3282	4.1712e-30	4.1879e-29
PGSC0003DMG400020831	853.023	226.557	1.9127	4.3155e-30	4.3313e-29
PGSC0003DMG400002237	1259.9	380.28	1.7282	4.4301e-30	4.4448e-29
PGSC0003DMG400019618	1292.82	397.361	1.702	4.7672e-30	4.7779e-29
PGSC0003DMG400021629	3164.45	1133.66	1.481	4.7766e-30	4.7856e-29
PGSC0003DMG400031412	3382.59	1237.74	1.4504	4.9233e-30	4.9309e-29
PGSC0003DMG400022221	508.359	74.2206	2.776	5.1614e-30	5.1676e-29
PGSC0003DMG400032789	300.968	38.677	2.9601	5.4787e-30	5.4814e-29
PGSC0003DMG400016369	1109.62	325.953	1.7673	5.6101e-30	5.6109e-29
PGSC0003DMG400032187	2581.54	904.088	1.5137	5.7455e-30	5.7403e-29
PGSC0003DMG400012901	12948.2	5138.77	1.3333	5.7766e-30	5.7673e-29
PGSC0003DMG400013285	1158.92	341.095	1.7645	5.9882e-30	5.9744e-29
PGSC0003DMG400022764	185.841	0.621126	8.225	6.0781e-30	6.0599e-29
PGSC0003DMG400026300	3010.48	179.45	4.0683	6.1337e-30	6.1131e-29
PGSC0003DMG400026001	447.072	74.406	2.587	6.2051e-30	6.1822e-29
PGSC0003DMG400003569	457.748	25.6854	4.1555	6.2196e-30	6.1945e-29
Novel02721	1334.94	412.586	1.694	6.6011e-30	6.5721e-29
PGSC0003DMG400022639	212.238	14.7948	3.8425	6.7121e-30	6.6803e-29
PGSC0003DMG402004451	1302.16	397.555	1.7117	6.794e-30	6.7594e-29
PGSC0003DMG400026516	3462.08	1284.3	1.4307	7.3687e-30	7.3262e-29
PGSC0003DMG400025078	1614.63	527.491	1.614	7.5485e-30	7.4997e-29
PGSC0003DMG400014467	2295.94	798.687	1.5234	7.7161e-30	7.6609e-29
PGSC0003DMG400024197	9251.37	3695.14	1.324	8.1097e-30	8.0489e-29
PGSC0003DMG400004861	2028.65	685.169	1.566	8.2166e-30	8.1521e-29
Novel01359	140.918	3.09075	5.5108	8.2486e-30	8.1811e-29
PGSC0003DMG400024267	1640.01	520.675	1.6552	9.3487e-30	9.2689e-29
PGSC0003DMG400021708	1147.01	341.321	1.7487	9.538e-30	9.4534e-29
PGSC0003DMG400031015	241.863	23.5414	3.3609	9.663e-30	9.5706e-29
PGSC0003DMG400028160	518.99	106.54	2.2843	1.0126e-29	1.0026e-28
PGSC0003DMG400003993	174.61	8.63609	4.3376	1.1425e-29	1.1289e-28
PGSC0003DMG400029171	409.433	71.0868	2.526	1.1693e-29	1.1549e-28
PGSC0003DMG400004367	182.877	9.83577	4.2167	1.3069e-29	1.2891e-28
PGSC0003DMG400012940	1052.95	301.449	1.8044	1.3393e-29	1.3206e-28
PGSC0003DMG400003074	1034.16	291.764	1.8256	1.4869e-29	1.4635e-28
PGSC0003DMG400001470	1359.96	427.839	1.6684	1.5236e-29	1.4992e-28
PGSC0003DMG400006441	4290.18	1599.6	1.4233	1.6034e-29	1.5766e-28
PGSC0003DMG400009180	2881.47	1048.98	1.4578	1.6629e-29	1.6345e-28
PGSC0003DMG402002635	2510.91	865.698	1.5363	1.6851e-29	1.6558e-28
PGSC0003DMG400014656	464.671	86.7427	2.4214	1.7002e-29	1.67e-28
PGSC0003DMG400003126	1418.24	338.363	2.0675	1.712e-29	1.6811e-28
PGSC0003DMG400005465	2900.32	817.383	1.8271	1.8943e-29	1.8588e-28
PGSC0003DMG400011546	2107.45	725.296	1.5389	1.8986e-29	1.8623e-28
PGSC0003DMG400030418	221.686	18.2564	3.602	1.9275e-29	1.89e-28
PGSC0003DMG400028152	962.803	37.1314	4.6965	1.9389e-29	1.9006e-28
PGSC0003DMG400028994	813.084	216.083	1.9118	1.9869e-29	1.947e-28
PGSC0003DMG400019316	3380.31	1248.69	1.4367	2.1237e-29	2.0796e-28
PGSC0003DMG400000462	3969.47	1453.81	1.4491	2.1748e-29	2.1282e-28
PGSC0003DMG400004929	512.34	102.717	2.3184	2.1841e-29	2.1365e-28
PGSC0003DMG400046334	431.711	78.3501	2.4621	2.4682e-29	2.4055e-28
PGSC0003DMG402023644	251.174	17.6931	3.8274	2.9324e-29	2.8539e-28
PGSC0003DMG400004409	3017.06	1110.93	1.4414	2.9593e-29	2.8791e-28
PGSC0003DMG400012551	2220.76	775.944	1.517	2.968e-29	2.8866e-28
PGSC0003DMG400018184	2201.58	268.669	3.0346	3.1147e-29	3.0241e-28
PGSC0003DMG400016683	159.343	5.8859	4.7587	3.1524e-29	3.0587e-28
Novel03328	662.762	158.746	2.0618	3.1597e-29	3.0647e-28
PGSC0003DMG400019131	7937.1	3169.59	1.3243	3.2234e-29	3.1254e-28
PGSC0003DMG400033590	1154.51	127.144	3.1827	3.2502e-29	3.1493e-28
PGSC0003DMG400022714	2219.48	771.142	1.5251	3.3526e-29	3.2463e-28
PGSC0003DMG400000374	491.681	97.7558	2.3305	3.4357e-29	3.3257e-28
PGSC0003DMG400010520	4243.99	1597.61	1.4095	3.5551e-29	3.4389e-28
PGSC0003DMG400026456	7209.02	2137.88	1.7536	3.6349e-29	3.5149e-28
PGSC0003DMG400015601	3493.61	91.5554	5.2539	3.8064e-29	3.6795e-28
PGSC0003DMG400030899	5484.42	2108.75	1.379	4.2586e-29	4.1111e-28
PGSC0003DMG400008723	3226.12	1174.46	1.4578	4.4692e-29	4.31e-28
PGSC0003DMG400001694	6662.9	2605.88	1.3544	4.544e-29	4.3806e-28
Novel01235	1901.62	650.08	1.5485	4.6419e-29	4.4735e-28
PGSC0003DMG400013856	32490.4	2025.61	4.0036	4.7051e-29	4.5329e-28
PGSC0003DMG401001401	1556.79	516.286	1.5923	5.1472e-29	4.9505e-28
PGSC0003DMG400011025	723.222	182.492	1.9866	5.7935e-29	5.5646e-28
PGSC0003DMG400005967	8719.01	347.119	4.6507	6.014e-29	5.7693e-28
PGSC0003DMG400017204	150.74	4.62853	5.0254	6.1513e-29	5.8983e-28
PGSC0003DMG400044171	116.648	0.678743	7.4251	6.2595e-29	6.0001e-28
PGSC0003DMG400014429	3385.52	1248.61	1.4391	6.7377e-29	6.4497e-28
PGSC0003DMG400027050	1238.15	384.353	1.6877	7.307e-29	6.9808e-28
PGSC0003DMG400018361	215.473	16.1898	3.7343	8.1037e-29	7.7315e-28
PGSC0003DMG400030006	309.849	35.393	3.13	8.6073e-29	8.2093e-28
PGSC0003DMG400018110	297.756	39.1401	2.9274	8.8022e-29	8.3923e-28
PGSC0003DMG400019360	10647.2	4290.44	1.3113	8.9508e-29	8.5312e-28
PGSC0003DMG400030409	123.391	1.48776	6.374	9.4611e-29	9.0085e-28
PGSC0003DMG400014772	1960.54	86.7862	4.4976	9.6244e-29	9.161e-28
PGSC0003DMG400009376	3119.5	1148.65	1.4414	9.9134e-29	9.4329e-28
Novel00898	1882.12	286.395	2.7163	1.0351e-28	9.8362e-28
PGSC0003DMG400001443	1968.31	671.645	1.5512	1.0785e-28	1.0241e-27
PGSC0003DMG400027787	2252.89	796.76	1.4996	1.1464e-28	1.0872e-27
PGSC0003DMG400031793	1056.11	316.328	1.7393	1.1962e-28	1.1337e-27
PGSC0003DMG400021945	417.043	16.5885	4.6519	1.2348e-28	1.1699e-27
PGSC0003DMG400030029	227.769	20.8763	3.4476	1.2934e-28	1.225e-27
PGSC0003DMG400007976	682.389	171.272	1.9943	1.3877e-28	1.3135e-27
PGSC0003DMG400000241	967.352	178.24	2.4402	1.3964e-28	1.3213e-27
PGSC0003DMG400021177	7104.13	2803.58	1.3414	1.4978e-28	1.4158e-27
PGSC0003DMG400008029	2264.52	813.255	1.4774	1.537e-28	1.4519e-27
PGSC0003DMG400022294	2590.5	939.542	1.4632	1.6201e-28	1.5299e-27
Novel01387	22249.9	5618.15	1.9856	1.6932e-28	1.5978e-27
Novel00780	431.993	8.60104	5.6504	1.7642e-28	1.6627e-27
PGSC0003DMG401009243	1956.83	684.534	1.5153	1.8206e-28	1.7152e-27
Novel01253	1822.02	622.192	1.5501	1.8697e-28	1.7603e-27
PGSC0003DMG400022027	3978.97	1515.08	1.393	1.9437e-28	1.8294e-27
PGSC0003DMG400029075	864.591	241.064	1.8426	1.9445e-28	1.8295e-27
PGSC0003DMG400030824	250.105	27.3108	3.195	2.0248e-28	1.902e-27
PGSC0003DMG400043560	4633.96	1776.4	1.3833	2.0667e-28	1.9407e-27
PGSC0003DMG402005733	2767.35	1011.79	1.4516	2.0786e-28	1.9512e-27
Novel00783	501.069	96.308	2.3793	2.1064e-28	1.9767e-27
Novel03146	1267.96	405.243	1.6456	2.1459e-28	2.0131e-27
PGSC0003DMG400030467	2478.35	883.884	1.4875	2.1676e-28	2.0321e-27
PGSC0003DMG400003217	447.13	53.9245	3.0517	2.2379e-28	2.0974e-27
PGSC0003DMG402019416	576.102	99.1662	2.5384	2.2769e-28	2.1332e-27
PGSC0003DMG400002520	158.909	5.44523	4.8671	2.3002e-28	2.1542e-27
PGSC0003DMG400010674	2554.28	678.909	1.9116	2.484e-28	2.3234e-27
PGSC0003DMG400005048	1054.66	314.627	1.7451	2.6736e-28	2.495e-27
PGSC0003DMG400027063	3588.96	1377.03	1.382	2.6872e-28	2.5069e-27
PGSC0003DMG400016015	257.282	6.75262	5.2518	3.0249e-28	2.8192e-27
PGSC0003DMG400024456	528.109	34.4314	3.939	3.204e-28	2.9852e-27
PGSC0003DMG402002121	139.303	4.015	5.1167	3.3122e-28	3.085e-27
PGSC0003DMG400021438	726.285	188.516	1.9458	3.7759e-28	3.5122e-27
PGSC0003DMG400025747	117.167	1.11206	6.7192	3.8992e-28	3.6258e-27
PGSC0003DMG400001042	766.864	201.823	1.9259	4.0627e-28	3.7728e-27
PGSC0003DMG400021267	995.093	292.37	1.767	4.1024e-28	3.8085e-27
PGSC0003DMG400030478	2144.62	766.445	1.4845	4.3576e-28	4.0441e-27
PGSC0003DMG400021582	213.799	15.1731	3.8167	4.3767e-28	4.0604e-27
PGSC0003DMG401009291	465.937	92.9017	2.3264	4.3935e-28	4.0747e-27
PGSC0003DMG400025811	1198.59	373.232	1.6832	4.4698e-28	4.1442e-27
PGSC0003DMG400029322	4708.12	1081	2.1228	4.6082e-28	4.2711e-27
PGSC0003DMG400023880	742.742	197.443	1.9114	5.3614e-28	4.9595e-27
Novel00384	362.368	10.7102	5.0804	5.6529e-28	5.2275e-27
PGSC0003DMG400022616	182.271	10.9678	4.0547	5.8683e-28	5.4232e-27
PGSC0003DMG400010041	3726.89	1427.03	1.385	5.9321e-28	5.4804e-27
PGSC0003DMG400023321	1975.34	695.967	1.505	6.1675e-28	5.6942e-27
PGSC0003DMG402031322	233.94	23.0928	3.3406	6.2246e-28	5.745e-27
PGSC0003DMG400006708	454.779	21.7957	4.3831	6.4975e-28	5.995e-27
PGSC0003DMG400006739	2286.72	813.334	1.4914	6.5403e-28	6.0325e-27
PGSC0003DMG400014843	417.956	78.7809	2.4074	6.5553e-28	6.0444e-27
PGSC0003DMG400003865	221.951	20.0822	3.4662	6.5578e-28	6.0447e-27
PGSC0003DMG400022254	9828.11	4032.55	1.2852	7.1968e-28	6.6253e-27
PGSC0003DMG400022985	952.633	278.993	1.7717	7.3436e-28	6.756e-27
PGSC0003DMG401026984	6471.48	259.832	4.6384	7.454e-28	6.8554e-27
PGSC0003DMG400026493	4848.2	918.061	2.4008	7.5389e-28	6.9312e-27
PGSC0003DMG400010876	274.643	13.1345	4.3861	7.7919e-28	7.1592e-27
Novel02679	1321.94	216.839	2.608	7.8587e-28	7.2182e-27
PGSC0003DMG400005418	225.522	21.0214	3.4233	8.3585e-28	7.6724e-27
Novel00935	2166.51	776.595	1.4801	8.8482e-28	8.1141e-27
PGSC0003DMG400025245	5281.82	2086.05	1.3403	9.5926e-28	8.7837e-27
PGSC0003DMG400004153	1510.95	507.483	1.574	9.7332e-28	8.9086e-27
PGSC0003DMG400009084	4834.94	1898.38	1.3487	9.8735e-28	9.034e-27
PGSC0003DMG400041402	200.319	13.2221	3.9213	1.0111e-27	9.2427e-27
PGSC0003DMG400022183	491.23	103.947	2.2405	1.0641e-27	9.7147e-27
Novel02408	3321.85	82.06	5.3392	1.096e-27	9.999e-27
PGSC0003DMG401015894	686.995	38.5037	4.1572	1.1247e-27	1.0258e-26
PGSC0003DMG400000337	1072.82	326.964	1.7142	1.1293e-27	1.0297e-26
PGSC0003DMG400031787	2304.2	832.027	1.4696	1.1444e-27	1.0431e-26
PGSC0003DMG400006453	709.032	187.257	1.9208	1.2611e-27	1.148e-26
PGSC0003DMG400024040	3091.55	1162.14	1.4115	1.2747e-27	1.1597e-26
PGSC0003DMG400020317	2663.6	977.267	1.4466	1.3269e-27	1.2063e-26
PGSC0003DMG400004274	4839.01	810.364	2.5781	1.4157e-27	1.2851e-26
PGSC0003DMG400029320	915.458	261.272	1.8089	1.5214e-27	1.3797e-26
Novel02752	994.047	103.337	3.266	1.5489e-27	1.4042e-26
PGSC0003DMG400010748	1702.76	589.134	1.5312	1.691e-27	1.5311e-26
PGSC0003DMG400021282	1337.65	442.328	1.5965	1.9205e-27	1.7356e-26
PGSC0003DMG400025159	218.353	19.729	3.4683	2.2308e-27	2.0134e-26
PGSC0003DMG400002070	1067.19	327.267	1.7053	2.2425e-27	2.0234e-26
PGSC0003DMG401028933	1054.6	320.975	1.7162	2.4459e-27	2.2034e-26
PGSC0003DMG400006447	244.793	26.8047	3.191	2.5031e-27	2.2542e-26
PGSC0003DMG401021097	2189.92	790.28	1.4704	2.565e-27	2.3077e-26
PGSC0003DMG400021533	897.391	260.439	1.7848	2.6445e-27	2.3763e-26
PGSC0003DMG400007999	1700.22	577.239	1.5585	2.6722e-27	2.4004e-26
PGSC0003DMG400008366	5545.29	2204.24	1.331	2.6918e-27	2.4173e-26
PGSC0003DMG400024627	648.739	40.4602	4.0031	2.7922e-27	2.505e-26
PGSC0003DMG400004542	5438.71	2176.12	1.3215	2.8652e-27	2.5698e-26
PGSC0003DMG400018276	1161.37	206.135	2.4942	2.9313e-27	2.6282e-26
PGSC0003DMG400008322	676.827	174.55	1.9551	3.013e-27	2.6998e-26
PGSC0003DMG400027850	879.928	254.498	1.7897	3.2139e-27	2.8781e-26
Novel02120	995.089	302.061	1.72	3.2224e-27	2.8847e-26
PGSC0003DMG400001566	1536.06	526.544	1.5446	3.3732e-27	3.0187e-26
PGSC0003DMG400025875	311.712	47.3354	2.7192	3.4936e-27	3.1236e-26
PGSC0003DMG400023957	164.485	8.38298	4.2944	3.5506e-27	3.1736e-26
PGSC0003DMG400001209	298.859	31.8388	3.2306	3.5972e-27	3.2142e-26
PGSC0003DMG400002586	891.114	261.128	1.7709	3.609e-27	3.2237e-26
PGSC0003DMG400009707	165.993	9.30731	4.1566	3.6483e-27	3.2568e-26
PGSC0003DMG400024629	2639.33	864.009	1.6111	3.6835e-27	3.2851e-26
PGSC0003DMG400007462	496.111	109.43	2.1807	3.7242e-27	3.3204e-26
PGSC0003DMG400000174	255.061	30.9776	3.0415	3.7679e-27	3.3584e-26
PGSC0003DMG400026054	183.003	11.5537	3.9854	4.1479e-27	3.6947e-26
PGSC0003DMG400019612	890.729	174.205	2.3542	4.2319e-27	3.7672e-26
PGSC0003DMG400021789	3219.34	1239.97	1.3765	4.3264e-27	3.8477e-26
Novel00029	225.048	6.26152	5.1676	4.4848e-27	3.9861e-26
PGSC0003DMG400000574	4784.73	1684.86	1.5058	4.7615e-27	4.2281e-26
PGSC0003DMG403019442	3489.16	1338.21	1.3826	5.2928e-27	4.6926e-26
PGSC0003DMG400040241	536.655	123.493	2.1196	5.6398e-27	4.9987e-26
PGSC0003DMG400015015	846.68	244.385	1.7927	5.9198e-27	5.2453e-26
PGSC0003DMG402007403	2037.79	733.302	1.4745	6.3361e-27	5.6124e-26
PGSC0003DMG400030219	2338.2	616.917	1.9223	6.6247e-27	5.8644e-26
PGSC0003DMG400027744	1170.49	171.544	2.7705	6.6332e-27	5.8701e-26
PGSC0003DMG400012601	4961.56	1992.73	1.3161	6.8764e-27	6.0834e-26
PGSC0003DMG400023710	3195.03	1220.44	1.3884	7.0719e-27	6.2506e-26
PGSC0003DMG400019587	1006.1	263.829	1.9311	7.2119e-27	6.3723e-26
PGSC0003DMG400010493	2347.86	867.012	1.4372	7.2584e-27	6.4095e-26
PGSC0003DMG400017474	1939.01	693.937	1.4824	7.5037e-27	6.6199e-26
Novel01610	135.755	4.52098	4.9082	7.5229e-27	6.6348e-26
PGSC0003DMG400010121	2135.88	775.182	1.4622	7.5633e-27	6.6684e-26
PGSC0003DMG400026393	642.698	166.716	1.9467	7.6782e-27	6.7655e-26
PGSC0003DMG400047346	1479.97	135.731	3.4467	7.7409e-27	6.8186e-26
PGSC0003DMG400017958	2783.85	115.685	4.5888	7.8893e-27	6.9473e-26
PGSC0003DMG400016150	2247.14	827.959	1.4405	8.2716e-27	7.2794e-26
PGSC0003DMG400016207	2885.14	1106.35	1.3828	8.2836e-27	7.2877e-26
PGSC0003DMG400022200	1255.4	412.385	1.6061	8.4683e-27	7.448e-26
PGSC0003DMG400003634	1465.97	499.642	1.5529	8.5193e-27	7.4882e-26
PGSC0003DMG400010801	4626.88	1861.09	1.3139	8.8931e-27	7.812e-26
PGSC0003DMG400007001	3316.48	1283.04	1.3701	9.0523e-27	7.9469e-26
PGSC0003DMG400019394	343.728	57.6217	2.5766	9.3445e-27	8.2009e-26
PGSC0003DMG400010022	1727.43	74.1802	4.5414	9.4761e-27	8.3138e-26
PGSC0003DMG400008567	1558.26	535.693	1.5405	9.6473e-27	8.4614e-26
PGSC0003DMG400018544	31050.9	7768.91	1.9988	9.8963e-27	8.6772e-26
PGSC0003DMG400015678	18178.2	596.529	4.9295	9.9378e-27	8.7082e-26
PGSC0003DMG400003004	1154.1	370.63	1.6387	1.029e-26	9.0116e-26
PGSC0003DMG400003836	1158.82	370.7	1.6443	1.1765e-26	1.0297e-25
PGSC0003DMG400025398	4384.34	1734.44	1.3379	1.2143e-26	1.0621e-25
PGSC0003DMG400011771	485.961	87.446	2.4744	1.2233e-26	1.0696e-25
PGSC0003DMG400004717	1500.46	505.626	1.5693	1.237e-26	1.081e-25
PGSC0003DMG400008000	1783.16	47.5257	5.2296	1.3771e-26	1.2026e-25
Novel01389	4328.28	1716.46	1.3344	1.3845e-26	1.2087e-25
PGSC0003DMG400022436	1241.01	39.0323	4.9907	1.4421e-26	1.2586e-25
PGSC0003DMG400044320	1065.97	336.693	1.6627	1.5151e-26	1.322e-25
PGSC0003DMG400033362	978.726	300.548	1.7033	1.5164e-26	1.3227e-25
PGSC0003DMG400002327	173.403	9.35219	4.2127	1.5243e-26	1.3292e-25
PGSC0003DMG400009343	3005.09	1153.06	1.3819	1.6325e-26	1.4209e-25
Novel02240	241.099	13.6702	4.1405	1.6442e-26	1.4298e-25
PGSC0003DMG401000306	389.942	73.1879	2.4136	1.6611e-26	1.4436e-25
PGSC0003DMG400020133	453.082	32.9085	3.7832	1.7889e-26	1.5533e-25
PGSC0003DMG400004349	6379.37	2600.34	1.2947	1.821e-26	1.5807e-25
PGSC0003DMG400019403	2148.62	791.235	1.4412	1.9907e-26	1.7254e-25
PGSC0003DMG400018259	606.823	150.558	2.011	1.9924e-26	1.7263e-25
Novel02718	4763.05	1902.37	1.3241	2.0335e-26	1.7603e-25
PGSC0003DMG400029645	347.223	60.7452	2.515	2.2132e-26	1.9153e-25
PGSC0003DMG403003154	445.445	91.534	2.2829	2.279e-26	1.9716e-25
PGSC0003DMG400007159	1354.62	422.053	1.6824	2.4098e-26	2.0829e-25
PGSC0003DMG401021671	657.448	175.157	1.9082	2.4469e-26	2.1143e-25
PGSC0003DMG400007800	2921.02	246.904	3.5644	2.4673e-26	2.1313e-25
PGSC0003DMG400000421	1962.09	726.064	1.4342	2.4825e-26	2.1438e-25
PGSC0003DMG402013278	149.285	7.47402	4.32	2.5303e-26	2.1845e-25
PGSC0003DMG400018670	4298.42	789.46	2.4449	2.7973e-26	2.4127e-25
PGSC0003DMG400022420	3935.28	1566.17	1.3292	2.9106e-26	2.5097e-25
PGSC0003DMG400029625	1957.39	716.801	1.4493	2.925e-26	2.5214e-25
PGSC0003DMG400033047	155.811	7.2433	4.427	2.9356e-26	2.5297e-25
PGSC0003DMG400008882	1228.8	160.592	2.9358	2.9936e-26	2.5782e-25
PGSC0003DMG400029898	3404.1	1338.5	1.3467	3.0362e-26	2.6141e-25
PGSC0003DMG400020252	864.879	254.31	1.7659	3.0582e-26	2.6322e-25
Novel01614	2438.78	911.624	1.4197	3.0732e-26	2.6444e-25
PGSC0003DMG400006270	112.76	1.48024	6.2513	3.1032e-26	2.6693e-25
PGSC0003DMG400024268	1503.03	80.3418	4.2256	3.1555e-26	2.7135e-25
PGSC0003DMG400001767	517.915	104.538	2.3087	3.1657e-26	2.7207e-25
PGSC0003DMG400044116	1255.24	401.301	1.6452	3.2655e-26	2.8047e-25
PGSC0003DMG402009322	813.67	239.439	1.7648	3.3701e-26	2.8937e-25
PGSC0003DMG400011929	604.203	72.6048	3.0569	3.3833e-26	2.9032e-25
PGSC0003DMG400027683	2778.45	822.289	1.7566	3.492e-26	2.9956e-25
Novel01717	1387.74	482.231	1.5249	3.5488e-26	3.0426e-25
PGSC0003DMG400016235	264.751	34.4237	2.9432	3.5977e-26	3.0817e-25
PGSC0003DMG400004719	507.729	115.23	2.1395	3.6802e-26	3.1505e-25
PGSC0003DMG400030951	1832.88	660.373	1.4728	3.6922e-26	3.1598e-25
PGSC0003DMG400033668	1168.8	378.697	1.6259	3.7566e-26	3.214e-25
PGSC0003DMG400019701	4676.03	1903.38	1.2967	3.8479e-26	3.2911e-25
PGSC0003DMG400020280	332.339	38.1578	3.1226	3.9867e-26	3.4067e-25
PGSC0003DMG400026515	800.448	75.888	3.3989	4.166e-26	3.5578e-25
PGSC0003DMG400000523	394.277	36.5402	3.4317	4.4069e-26	3.7602e-25
PGSC0003DMG400014312	3376.38	845.357	1.9978	4.5228e-26	3.8557e-25
PGSC0003DMG401000923	3170.12	1231.22	1.3644	4.5596e-26	3.8858e-25
PGSC0003DMG400014592	1027.33	329.06	1.6425	4.5767e-26	3.8981e-25
PGSC0003DMG400022808	265.879	35.0999	2.9212	4.811e-26	4.094e-25
PGSC0003DMG400029547	2534.38	958.34	1.403	5.2418e-26	4.4527e-25
PGSC0003DMG400005102	464.273	101.4	2.1949	5.2839e-26	4.4871e-25
PGSC0003DMG400024698	766.806	186.318	2.0411	5.2899e-26	4.4908e-25
PGSC0003DMG400018131	495.928	22.8047	4.4427	5.3865e-26	4.5701e-25
PGSC0003DMG400010772	1130.08	372.833	1.5998	5.5245e-26	4.6844e-25
PGSC0003DMG401023527	1380.81	470.54	1.5531	5.6241e-26	4.7675e-25
PGSC0003DMG400012142	167.302	11.3888	3.8768	5.8149e-26	4.9263e-25
PGSC0003DMG400003013	354.221	21.2821	4.0569	6.0209e-26	5.0993e-25
Novel03255	1144.4	382.414	1.5814	6.0886e-26	5.1536e-25
PGSC0003DMG400010060	479.631	108.519	2.144	6.1932e-26	5.2405e-25
PGSC0003DMG400017789	309.314	48.7879	2.6645	6.2688e-26	5.303e-25
PGSC0003DMG400012680	1066.1	338.515	1.655	6.3443e-26	5.3652e-25
PGSC0003DMG400022381	11210	4746.53	1.2398	6.361e-26	5.3762e-25
PGSC0003DMG400005849	965.383	300.097	1.6857	6.4265e-26	5.4283e-25
Novel00340	370.915	13.4978	4.7803	6.5512e-26	5.532e-25
PGSC0003DMG400006621	876.778	266.09	1.7203	7.1623e-26	6.0356e-25
PGSC0003DMG400012669	311.887	50.7416	2.6198	7.4465e-26	6.2714e-25
Novel01261	486.482	108.535	2.1642	7.5255e-26	6.3361e-25
PGSC0003DMG401010047	2533.05	974.593	1.378	7.5711e-26	6.3726e-25
PGSC0003DMG400029516	831.58	239.003	1.7988	7.7748e-26	6.5401e-25
PGSC0003DMG400011167	505.787	119.211	2.085	7.9434e-26	6.68e-25
PGSC0003DMG400010229	269.741	36.5727	2.8827	8.1068e-26	6.8134e-25
Novel01249	5665.53	2329.52	1.2822	8.2149e-26	6.9023e-25
PGSC0003DMG400005762	387.619	75.0465	2.3688	8.8028e-26	7.3897e-25
PGSC0003DMG400009117	326.388	56.465	2.5312	9.0154e-26	7.5659e-25
PGSC0003DMG400032797	1091.95	356.207	1.6161	9.0369e-26	7.5818e-25
PGSC0003DMG400000098	1220.26	403.132	1.5979	9.1482e-26	7.6707e-25
PGSC0003DMG400002067	166.818	9.59762	4.1195	9.1623e-26	7.6802e-25
Novel02920	409.953	47.3347	3.1145	9.1761e-26	7.6895e-25
PGSC0003DMG400019130	1690.91	543.749	1.6368	9.5176e-26	7.964e-25
PGSC0003DMG400021478	361.673	62.1668	2.5405	9.7744e-26	8.1694e-25
Novel02921	427.788	86.8904	2.2996	1.0014e-25	8.367e-25
PGSC0003DMG401012961	947.128	293.273	1.6913	1.0488e-25	8.7583e-25
PGSC0003DMG400024608	281.843	40.049	2.8151	1.0964e-25	9.1452e-25
PGSC0003DMG400001363	628.867	165.088	1.9295	1.1043e-25	9.2077e-25
PGSC0003DMG400028961	1558.58	308.235	2.3381	1.1312e-25	9.424e-25
PGSC0003DMG400008437	2579	989.975	1.3813	1.1461e-25	9.5455e-25
PGSC0003DMG400011404	159.783	7.05558	4.5012	1.2075e-25	1.0048e-24
PGSC0003DMG400002634	1172.24	93.7987	3.6436	1.2246e-25	1.0188e-24
PGSC0003DMG400027335	337.995	57.2481	2.5617	1.2974e-25	1.0781e-24
PGSC0003DMG400027269	1171.2	393.068	1.5751	1.3035e-25	1.0828e-24
PGSC0003DMG400015405	460.455	99.6114	2.2087	1.3214e-25	1.0971e-24
PGSC0003DMG400026016	933.702	295.728	1.6587	1.3417e-25	1.1135e-24
PGSC0003DMG400011436	1366.66	298.188	2.1964	1.402e-25	1.1632e-24
PGSC0003DMG400032180	2741.74	1059.31	1.372	1.4052e-25	1.1656e-24
PGSC0003DMG400018247	873.05	258.354	1.7567	1.4155e-25	1.1738e-24
PGSC0003DMG400016636	978.864	305.79	1.6786	1.4213e-25	1.1779e-24
PGSC0003DMG400015670	1338.4	414.231	1.692	1.4383e-25	1.1917e-24
PGSC0003DMG401029267	2420.02	928.409	1.3822	1.4454e-25	1.1972e-24
PGSC0003DMG400014776	139.542	5.44506	4.6796	1.4511e-25	1.2016e-24
PGSC0003DMG400003313	579.842	143.668	2.0129	1.4556e-25	1.2049e-24
Novel01134	252.275	32.5479	2.9544	1.5665e-25	1.2956e-24
PGSC0003DMG401030621	702.076	195.875	1.8417	1.5855e-25	1.3109e-24
Novel02668	379.35	45.464	3.0607	1.6158e-25	1.3356e-24
PGSC0003DMG400001204	1606.9	100.128	4.0044	1.7315e-25	1.4301e-24
PGSC0003DMG400008860	1570.65	561.11	1.485	1.7455e-25	1.4412e-24
PGSC0003DMG400025751	1126.37	329.616	1.7728	1.7863e-25	1.4745e-24
PGSC0003DMG400010074	2224.61	834.433	1.4147	1.795e-25	1.4812e-24
PGSC0003DMG402028796	521.944	128.023	2.0275	1.8305e-25	1.5096e-24
PGSC0003DMG400017768	221.008	8.84646	4.6429	1.8794e-25	1.549e-24
PGSC0003DMG400028926	503.764	117.613	2.0987	1.9448e-25	1.602e-24
PGSC0003DMG400017949	559.98	135.132	2.051	1.9974e-25	1.6449e-24
Novel01692	220.387	23.6864	3.2179	2.0004e-25	1.6469e-24
PGSC0003DMG400031013	834.187	251.713	1.7286	2.0121e-25	1.6555e-24
Novel03233	1915.07	706.528	1.4386	2.0794e-25	1.7104e-24
PGSC0003DMG400024481	2659.15	1030.7	1.3673	2.0859e-25	1.7153e-24
PGSC0003DMG400012775	1702.23	616.284	1.4658	2.1084e-25	1.7333e-24
PGSC0003DMG400011414	2468.02	952.897	1.373	2.2714e-25	1.8662e-24
PGSC0003DMG400015379	3007.25	1201.02	1.3242	2.2928e-25	1.8833e-24
PGSC0003DMG400027185	490.378	112.989	2.1177	2.3272e-25	1.911e-24
PGSC0003DMG400027091	1547.27	540.858	1.5164	2.3591e-25	1.9366e-24
PGSC0003DMG400007182	1661.74	584.883	1.5065	2.3797e-25	1.9529e-24
Novel02027	833.788	253.524	1.7176	2.4197e-25	1.9847e-24
Novel02686	1451.47	507.911	1.5149	2.5522e-25	2.0927e-24
PGSC0003DMG400011038	135.897	5.82093	4.5451	2.5775e-25	2.1129e-24
PGSC0003DMG400017965	688.07	150.959	2.1884	2.5899e-25	2.1224e-24
PGSC0003DMG400020286	1482.48	527.413	1.491	2.5998e-25	2.1293e-24
PGSC0003DMG400033689	12834.7	3773.65	1.766	2.6489e-25	2.1689e-24
PGSC0003DMG400032791	3858.99	1565.64	1.3015	2.6572e-25	2.1751e-24
PGSC0003DMG400013545	1283.04	444.393	1.5297	2.732e-25	2.2344e-24
PGSC0003DMG400006777	2332.74	894.627	1.3827	2.8332e-25	2.3165e-24
PGSC0003DMG400020826	1079.78	355.698	1.602	2.9235e-25	2.3889e-24
PGSC0003DMG400009477	144.365	7.1208	4.3415	2.9993e-25	2.4502e-24
PGSC0003DMG401028340	314.262	53.2288	2.5617	3.0142e-25	2.4616e-24
Novel03516	239.074	30.0208	2.9934	3.0547e-25	2.494e-24
PGSC0003DMG401009684	617.018	159.249	1.954	3.0679e-25	2.5041e-24
PGSC0003DMG401002024	399.145	71.3093	2.4848	3.1274e-25	2.5512e-24
PGSC0003DMG400019678	1555.85	558.142	1.479	3.1936e-25	2.6044e-24
Novel03074	752.023	215.907	1.8004	3.4659e-25	2.8249e-24
PGSC0003DMG400022727	1164.39	391.489	1.5725	3.472e-25	2.8291e-24
PGSC0003DMG400001864	825.026	242.728	1.7651	3.5151e-25	2.8633e-24
PGSC0003DMG400015546	17232.1	7475.27	1.2049	3.6274e-25	2.954e-24
PGSC0003DMG400028380	2991.18	1185.58	1.3351	3.742e-25	3.0452e-24
PGSC0003DMG400020260	2944.16	1171.22	1.3298	3.7425e-25	3.0452e-24
PGSC0003DMG400009907	2224.53	843.611	1.3989	3.7461e-25	3.0472e-24
PGSC0003DMG400000291	5147.83	2118.79	1.2807	3.7541e-25	3.052e-24
PGSC0003DMG400007295	5771.9	447.848	3.688	3.9359e-25	3.1971e-24
PGSC0003DMG402023438	7522.11	3189.04	1.238	4.1438e-25	3.363e-24
PGSC0003DMG400027003	655	180.597	1.8587	4.367e-25	3.5402e-24
PGSC0003DMG402012710	330.452	57.8922	2.513	4.3983e-25	3.5635e-24
PGSC0003DMG400026093	1994.56	752.82	1.4057	4.7038e-25	3.8089e-24
PGSC0003DMG400018957	715.016	125.963	2.505	4.7329e-25	3.8314e-24
PGSC0003DMG400022604	2939.16	1161.48	1.3394	4.8551e-25	3.928e-24
PGSC0003DMG400030814	5191.01	2161.12	1.2642	4.912e-25	3.9718e-24
PGSC0003DMG401011681	3056.49	1216.77	1.3288	4.9785e-25	4.0233e-24
PGSC0003DMG400033085	1200.16	410.001	1.5495	4.9872e-25	4.0292e-24
PGSC0003DMG402022117	665.744	183.765	1.8571	5.1971e-25	4.1976e-24
PGSC0003DMG400012829	1122.05	371.737	1.5938	5.3972e-25	4.3568e-24
PGSC0003DMG400000286	3802.45	1538.48	1.3054	5.4029e-25	4.3602e-24
PGSC0003DMG400010293	1333.84	413.143	1.6909	5.5922e-25	4.5117e-24
PGSC0003DMG400046427	369.079	69.8014	2.4026	5.7778e-25	4.6588e-24
PGSC0003DMG400010444	285.957	17.4476	4.0347	5.8555e-25	4.7174e-24
PGSC0003DMG400027653	5614.37	2353.63	1.2542	5.9253e-25	4.7723e-24
PGSC0003DMG400012340	457.322	105.681	2.1135	6.0769e-25	4.8902e-24
PGSC0003DMG400004037	636.333	14.4795	5.4577	6.1613e-25	4.9568e-24
PGSC0003DMG400014315	201.666	19.0278	3.4058	6.2419e-25	5.0202e-24
PGSC0003DMG400027937	255.726	33.4417	2.9349	6.2589e-25	5.0325e-24
Novel03401	1169.06	294.57	1.9887	6.4044e-25	5.1451e-24
Novel02489	398.827	80.9797	2.3001	6.4075e-25	5.1462e-24
PGSC0003DMG400025262	1671.42	606.699	1.462	6.4172e-25	5.1525e-24
PGSC0003DMG400005828	2733.64	1071.31	1.3515	6.4345e-25	5.165e-24
PGSC0003DMG400007997	663.821	184.321	1.8486	6.5672e-25	5.2699e-24
PGSC0003DMG400029478	404.596	84.1358	2.2657	6.8442e-25	5.4861e-24
PGSC0003DMG400007328	903.04	279.344	1.6927	7.1191e-25	5.7033e-24
PGSC0003DMG400023913	1214.86	410.598	1.565	7.1887e-25	5.7542e-24
PGSC0003DMG402003620	936.32	295.669	1.663	7.2311e-25	5.7865e-24
PGSC0003DMG400015229	3300.26	180.921	4.1892	7.2975e-25	5.838e-24
PGSC0003DMG401018164	1400.62	494.92	1.5008	7.3209e-25	5.8551e-24
PGSC0003DMG400007013	1127.58	381.476	1.5636	7.3342e-25	5.8641e-24
PGSC0003DMG400021719	110.216	2.16658	5.6688	7.4083e-25	5.9217e-24
PGSC0003DMG400014274	1561.05	564.088	1.4685	7.4641e-25	5.9646e-24
Novel02003	2504.95	436.351	2.5212	7.9231e-25	6.3279e-24
PGSC0003DMG400001830	322.01	56.7453	2.5045	8.2063e-25	6.5504e-24
PGSC0003DMG400024909	1540.04	555.101	1.4721	8.2283e-25	6.5661e-24
PGSC0003DMG400010528	1161.44	351.011	1.7263	8.2554e-25	6.5859e-24
PGSC0003DMG400025845	1766.1	656.587	1.4275	8.271e-25	6.5965e-24
PGSC0003DMG400020061	736.476	216.323	1.7675	8.5234e-25	6.794e-24
PGSC0003DMG400030121	13190.7	458.764	4.8456	8.6286e-25	6.8759e-24
PGSC0003DMG400017494	690.732	194.347	1.8295	9.89e-25	7.8724e-24
Novel02732	673.922	131.294	2.3598	9.9059e-25	7.8828e-24
PGSC0003DMG400027703	7370.07	3125.36	1.2377	9.953e-25	7.918e-24
Novel02395	1161.68	391.489	1.5692	1.062e-24	8.4466e-24
PGSC0003DMG400000180	1150.59	392.356	1.5521	1.0687e-24	8.4971e-24
PGSC0003DMG400009460	960.424	306.311	1.6487	1.069e-24	8.4974e-24
PGSC0003DMG400012714	5192.82	2187.62	1.2472	1.158e-24	9.1942e-24
PGSC0003DMG400021554	420.378	88.8841	2.2417	1.2527e-24	9.9381e-24
PGSC0003DMG400016852	629.469	173.208	1.8616	1.2574e-24	9.97e-24
PGSC0003DMG400008362	193.461	17.4748	3.4687	1.2749e-24	1.0106e-23
PGSC0003DMG400032562	568.448	145	1.971	1.2754e-24	1.0107e-23
PGSC0003DMG400016332	1236.54	423.52	1.5458	1.3743e-24	1.0875e-23
PGSC0003DMG400013298	126.263	3.58169	5.1396	1.3792e-24	1.0912e-23
PGSC0003DMG401024074	578.49	151.811	1.93	1.3831e-24	1.0936e-23
PGSC0003DMG400029308	801.031	244.453	1.7123	1.4056e-24	1.1111e-23
PGSC0003DMG400014540	2297.69	466.52	2.3002	1.4331e-24	1.1319e-23
PGSC0003DMG400000697	229.477	6.56464	5.1275	1.447e-24	1.1426e-23
PGSC0003DMG400019506	321.693	17.8153	4.1745	1.4507e-24	1.1452e-23
PGSC0003DMG400015467	2268.79	867.97	1.3862	1.5518e-24	1.2243e-23
PGSC0003DMG400009114	1019.08	328.694	1.6324	1.5971e-24	1.259e-23
PGSC0003DMG400029652	1412.14	510.327	1.4684	1.6452e-24	1.2958e-23
PGSC0003DMG400000311	1581.79	572.718	1.4657	1.6902e-24	1.3306e-23
PGSC0003DMG400016126	356.507	70.328	2.3418	1.7473e-24	1.3747e-23
Novel01129	1688.58	626.193	1.4311	1.7501e-24	1.3766e-23
PGSC0003DMG400002169	888.839	251.535	1.8212	1.804e-24	1.4186e-23
PGSC0003DMG400001496	5026.77	2103.43	1.2569	1.8807e-24	1.4785e-23
PGSC0003DMG400030470	1109.13	30.5119	5.1839	1.9577e-24	1.5382e-23
PGSC0003DMG400001174	122.393	3.95739	4.9508	2.0733e-24	1.6272e-23
PGSC0003DMG400014931	1162.68	392.287	1.5675	2.0851e-24	1.6356e-23
PGSC0003DMG400013073	501.515	93.0876	2.4296	2.1114e-24	1.6557e-23
Novel03093	4292.55	1111.85	1.9489	2.1262e-24	1.6669e-23
Novel00910	967.56	309.787	1.6431	2.1769e-24	1.7062e-23
PGSC0003DMG400018584	941.237	300.561	1.6469	2.2534e-24	1.7652e-23
Novel00732	3729.33	1542.28	1.2739	2.3172e-24	1.8147e-23
PGSC0003DMG400021415	789.841	236.291	1.741	2.3601e-24	1.8477e-23
PGSC0003DMG402030499	1724.23	640.293	1.4291	2.4077e-24	1.884e-23
PGSC0003DMG400027735	4487.94	1873.33	1.2604	2.4332e-24	1.9034e-23
PGSC0003DMG400001287	126.02	2.91046	5.4363	2.4726e-24	1.9332e-23
PGSC0003DMG400016401	567.585	55.1674	3.3629	2.541e-24	1.9855e-23
PGSC0003DMG400020098	582.874	154.481	1.9158	2.5476e-24	1.9901e-23
PGSC0003DMG400025012	1827.39	681.306	1.4234	2.698e-24	2.106e-23
Novel03212	900.466	286.157	1.6539	2.8103e-24	2.193e-23
PGSC0003DMG400029744	304.345	21.9754	3.7917	2.8478e-24	2.2217e-23
PGSC0003DMG400027759	200.202	21.237	3.2368	3.1629e-24	2.4641e-23
Novel03254	1019.35	335.878	1.6016	3.2201e-24	2.5066e-23
PGSC0003DMG400028198	764.476	223.933	1.7714	3.2852e-24	2.5559e-23
PGSC0003DMG400008852	2012.43	777.909	1.3713	3.3243e-24	2.5849e-23
PGSC0003DMG400004374	368.469	77.2612	2.2537	3.3691e-24	2.619e-23
PGSC0003DMG402013333	1289.55	447.997	1.5253	3.5047e-24	2.7237e-23
PGSC0003DMG400010897	458.432	110.325	2.055	3.5561e-24	2.7629e-23
Novel02377	1240.83	432.635	1.5201	3.653e-24	2.8375e-23
PGSC0003DMG400019157	2719.64	1091.43	1.3172	3.7144e-24	2.8844e-23
PGSC0003DMG400020474	366.271	73.5537	2.316	4.0134e-24	3.1123e-23
PGSC0003DMG402002606	1878.16	714.371	1.3946	4.1006e-24	3.1791e-23
PGSC0003DMG400014600	147.796	9.13454	4.0161	4.2186e-24	3.2679e-23
PGSC0003DMG400004660	641.274	29.2168	4.4561	4.2635e-24	3.3018e-23
PGSC0003DMG400016505	100.272	1.11206	6.4945	4.2735e-24	3.3086e-23
PGSC0003DMG401020784	2673.11	487.795	2.4542	4.3563e-24	3.3718e-23
PGSC0003DMG400008782	185.633	10.8101	4.102	4.502e-24	3.4827e-23
PGSC0003DMG400028205	982.707	324.378	1.5991	4.6198e-24	3.5709e-23
PGSC0003DMG401000722	3130.04	1286.96	1.2822	5.075e-24	3.9217e-23
PGSC0003DMG400012176	229.183	28.5879	3.003	5.468e-24	4.2209e-23
PGSC0003DMG400012228	602.099	163.259	1.8828	5.4798e-24	4.2288e-23
PGSC0003DMG400023442	973.883	321.62	1.5984	5.7302e-24	4.4208e-23
PGSC0003DMG400028320	2700.76	1082.92	1.3184	5.775e-24	4.4542e-23
PGSC0003DMG400012109	2827.42	824.201	1.7784	5.8675e-24	4.5231e-23
PGSC0003DMG400045654	208.791	12.4355	4.0695	5.8824e-24	4.5333e-23
PGSC0003DMG400027449	1163.75	312.439	1.8971	6.2445e-24	4.8086e-23
PGSC0003DMG400005079	1661.76	617.721	1.4277	6.4816e-24	4.9871e-23
PGSC0003DMG400002462	6289.59	1242.77	2.3394	6.9815e-24	5.3688e-23
PGSC0003DMG400028739	185.636	17.0416	3.4453	7.049e-24	5.4193e-23
PGSC0003DMG400021331	317.502	10.4793	4.9212	7.3144e-24	5.6203e-23
PGSC0003DMG400011330	2975.22	1207.67	1.3008	7.4232e-24	5.7023e-23
PGSC0003DMG400024321	3422.92	1174.54	1.5431	7.4715e-24	5.7379e-23
Novel00287	1604.22	587.033	1.4504	7.8366e-24	6.0119e-23
PGSC0003DMG400027699	422.291	94.0414	2.1669	8.2661e-24	6.3362e-23
Novel01882	1523.69	563.454	1.4352	8.3636e-24	6.4092e-23
PGSC0003DMG400027123	1791.03	689.301	1.3776	8.6976e-24	6.6617e-23
PGSC0003DMG400000168	1474.82	533.505	1.467	8.8998e-24	6.8147e-23
PGSC0003DMG400009905	1508.77	548.214	1.4606	9.113e-24	6.9761e-23
PGSC0003DMG400015808	3681.38	427.957	3.1047	9.218e-24	7.0545e-23
PGSC0003DMG400027438	2219.4	869.707	1.3516	9.2246e-24	7.0577e-23
PGSC0003DMG400002904	4225.6	1785.25	1.243	9.801e-24	7.4947e-23
PGSC0003DMG400002452	3173.92	1297.91	1.2901	9.8292e-24	7.5143e-23
PGSC0003DMG402023929	1855.88	703.346	1.3998	1.0079e-23	7.7009e-23
PGSC0003DMG400000511	778.971	242.815	1.6817	1.0293e-23	7.8627e-23
PGSC0003DMG400014823	469.373	19.9018	4.5598	1.0469e-23	7.9951e-23
PGSC0003DMG400047044	654.248	190.513	1.7799	1.0598e-23	8.091e-23
PGSC0003DMG400026762	1276.45	67.5959	4.2391	1.1157e-23	8.5155e-23
PGSC0003DMG400022026	150.547	8.00206	4.2337	1.1443e-23	8.7291e-23
PGSC0003DMG400014490	171.623	14.9554	3.5205	1.1502e-23	8.772e-23
PGSC0003DMG400032507	802.923	253.229	1.6648	1.1591e-23	8.8374e-23
PGSC0003DMG400012447	2125.55	831.87	1.3534	1.1859e-23	9.0391e-23
PGSC0003DMG400023689	489.459	124.351	1.9768	1.2422e-23	9.4634e-23
PGSC0003DMG400010314	3841.92	802.002	2.2602	1.2509e-23	9.5272e-23
PGSC0003DMG400000248	4913.91	1678.37	1.5498	1.2538e-23	9.5471e-23
PGSC0003DMG400012000	784.349	165.656	2.2433	1.287e-23	9.7889e-23
PGSC0003DMG402027032	1075.54	307.836	1.8048	1.323e-23	1.006e-22
PGSC0003DMG400007018	907.553	217.34	2.062	1.3711e-23	1.042e-22
PGSC0003DMG400030365	6466.9	2802.61	1.2063	1.478e-23	1.1218e-22
Novel02598	98.1648	1.23481	6.3128	1.5107e-23	1.146e-22
[truncated: 3,692 more rows]

## Sheet: X2_4h_Down
TableS4 The down-regulated DEGs of X2 tuters at 4 h after cut-wounding
gene_id	4h_readcount	0h_readcount	log2FoldChange	pval	padj
PGSC0003DMG400027130	1088.79	27489.3	-4.6581	4.1048e-268	5.8666e-264
PGSC0003DMG400003984	13445.6	298393	-4.472	9.4916e-263	9.0436e-259
PGSC0003DMG400019641	4492.98	95103.1	-4.4037	2.1848e-255	1.0408e-251
PGSC0003DMG400001915	146.955	4983.99	-5.0839	4.3767e-246	1.39e-242
PGSC0003DMG400004662	993.232	24853.1	-4.6452	3.304e-242	9.4442e-239
PGSC0003DMG400000364	5017.51	91635.5	-4.1909	1.1805e-235	3.0676e-232
PGSC0003DMG400008712	4251.56	77533.1	-4.1887	1.5058e-234	3.3109e-231
Novel00728	375.829	8573.59	-4.5118	6.8943e-230	1.1592e-226
Novel00553	913.777	17570.2	-4.2651	7.0704e-228	1.0637e-224
PGSC0003DMG400028791	1113.25	20540.4	-4.2056	2.7155e-226	3.8809e-223
PGSC0003DMG400031522	535.205	10751	-4.3282	1.0036e-223	1.304e-220
PGSC0003DMG400018356	122.781	3784.29	-4.9459	2.0182e-221	2.5082e-218
PGSC0003DMG400000644	1160.97	20473.3	-4.1403	9.8933e-221	1.1783e-217
PGSC0003DMG400017957	545.293	10625.3	-4.2843	2.4016e-219	2.6403e-216
PGSC0003DMG400015464	205.408	5101.22	-4.6343	8.6087e-218	9.1137e-215
Novel00552	364.923	7073.51	-4.2768	6.3855e-207	5.531e-204
PGSC0003DMG400021891	2813.76	40590.4	-3.8506	1.9007e-203	1.598e-200
PGSC0003DMG401000056	959.269	16512.8	-4.1055	3.7895e-203	3.0949e-200
PGSC0003DMG400026938	1930.2	30122.4	-3.964	6.4931e-199	4.7589e-196
PGSC0003DMG400031042	340.177	6039.33	-4.15	1.0177e-192	6.324e-190
PGSC0003DMG400014507	406.97	7636.82	-4.23	2.587e-192	1.5733e-189
PGSC0003DMG400000618	2169.19	28546.5	-3.7181	1.7695e-189	1.0116e-186
PGSC0003DMG400018104	590.81	21536.8	-5.188	1.6167e-184	8.887e-182
PGSC0003DMG402017944	51.0804	1891	-5.2102	5.0445e-183	2.7206e-180
PGSC0003DMG400009982	491.009	7651.8	-3.962	3.7068e-182	1.9264e-179
Novel01708	51.882	1863.11	-5.1663	1.2914e-180	6.5918e-178
PGSC0003DMG400025502	1577	19520.5	-3.6297	1.4155e-178	6.7434e-176
PGSC0003DMG400027943	1360.95	29170	-4.4218	1.6145e-178	7.5653e-176
PGSC0003DMG400024778	1665.03	20366	-3.6125	2.7804e-177	1.2227e-174
PGSC0003DMG400023400	32748.8	355832	-3.4417	1.1516e-172	4.7025e-170
PGSC0003DMG400003461	1820.55	21160.3	-3.5389	1.3754e-171	5.5373e-169
PGSC0003DMG400022432	4175.77	44314.7	-3.4077	1.4476e-165	5.5171e-163
PGSC0003DMG400009560	853.181	10107.4	-3.5664	2.8884e-164	1.0864e-161
PGSC0003DMG400023521	1071.52	18579.2	-4.116	6.0679e-158	2.1152e-155
PGSC0003DMG400027611	323.193	5264.45	-4.0258	1.8389e-157	6.2576e-155
PGSC0003DMG400019258	14298.7	133666	-3.2247	8.1604e-154	2.6209e-151
PGSC0003DMG400003863	6375.74	59321.3	-3.2179	4.241e-152	1.3177e-149
PGSC0003DMG400001934	152.085	2547.35	-4.066	4.0444e-151	1.2298e-148
PGSC0003DMG400012413	1379.36	13703.6	-3.3125	2.7336e-150	8.2249e-148
PGSC0003DMG400009125	567.148	9776.66	-4.1075	7.8296e-150	2.3313e-147
PGSC0003DMG400009044	1667.84	26367	-3.9827	9.1221e-148	2.5816e-145
PGSC0003DMG400024356	2776.07	25338.7	-3.1902	1.1853e-146	3.3216e-144
PGSC0003DMG400001985	18567.2	162822	-3.1325	3.4558e-146	9.5902e-144
PGSC0003DMG400012038	131.262	2240.96	-4.0936	6.8411e-145	1.8623e-142
PGSC0003DMG400008145	1932.54	23972	-3.6328	7.3979e-145	1.9949e-142
PGSC0003DMG400007647	870.918	8764.96	-3.3311	1.6609e-144	4.437e-142
PGSC0003DMG400022388	806.728	20923.8	-4.6969	1.5507e-143	3.9575e-141
PGSC0003DMG400001598	3565.53	71063	-4.3169	7.1643e-143	1.8123e-140
PGSC0003DMG400022778	899.523	11423.8	-3.6667	7.5086e-143	1.8827e-140
PGSC0003DMG400033858	301.279	7596.58	-4.6562	3.5673e-141	8.5686e-139
PGSC0003DMG400029305	961.192	9219.03	-3.2617	1.0043e-140	2.3921e-138
PGSC0003DMG400011632	438.249	4937.18	-3.4939	1.4461e-140	3.4161e-138
PGSC0003DMG400046756	3839.48	43849	-3.5136	1.5645e-140	3.6656e-138
PGSC0003DMG400022404	200.194	2784.88	-3.7981	1.5846e-140	3.6824e-138
Novel03175	2249.27	19782.4	-3.1367	2.7929e-140	6.438e-138
PGSC0003DMG400003495	1971.5	54638.6	-4.7926	1.4197e-139	3.1953e-137
PGSC0003DMG400008421	2336.41	20255.7	-3.116	1.1364e-138	2.4986e-136
PGSC0003DMG400025855	1439.66	12960.4	-3.1703	2.5079e-138	5.4307e-136
PGSC0003DMG401009190	2411.56	20391.8	-3.08	1.5642e-135	3.2635e-133
PGSC0003DMG400023146	4058.83	33239.7	-3.0338	4.0442e-135	8.3767e-133
PGSC0003DMG400028193	15365	122490	-2.995	5.8927e-135	1.2118e-132
PGSC0003DMG400007078	7287.54	58264.7	-2.9991	8.8069e-135	1.7854e-132
PGSC0003DMG400006828	3426.64	27511.1	-3.0051	9.4945e-133	1.8588e-130
PGSC0003DMG400016842	1763.91	28467.8	-4.0125	5.9342e-132	1.1384e-129
PGSC0003DMG400000104	3394.65	26993	-2.9913	2.7383e-131	5.2182e-129
PGSC0003DMG400022438	492.161	4823.11	-3.2928	6.8971e-130	1.297e-127
PGSC0003DMG400007228	2223.62	17774.7	-2.9988	1.0062e-129	1.8799e-127
PGSC0003DMG400004808	2330.28	19087	-3.034	2.3646e-129	4.3889e-127
Novel02009	1346.18	12128.6	-3.1715	5.0681e-129	9.2862e-127
PGSC0003DMG400012292	622.406	5773.91	-3.2136	1.1167e-128	2.0202e-126
PGSC0003DMG400023789	3738.09	28844.2	-2.9479	1.9774e-128	3.5549e-126
PGSC0003DMG400004596	209.914	3782.89	-4.1716	9.8859e-128	1.7443e-125
PGSC0003DMG400029761	727.298	7056.78	-3.2784	5.7961e-127	1.0041e-124
PGSC0003DMG401019343	19.6578	863.439	-5.4569	7.5339e-127	1.2973e-124
PGSC0003DMG400031261	256.32	2912.69	-3.5063	8.377e-127	1.4313e-124
PGSC0003DMG400025281	556.43	5142.3	-3.2081	2.3671e-126	3.9569e-124
PGSC0003DMG400020212	2506.08	19365.2	-2.95	2.3951e-126	3.9803e-124
PGSC0003DMG400031269	668.642	5970.79	-3.1586	5.979e-126	9.7658e-124
PGSC0003DMG400028273	2312.46	17886.5	-2.9514	2.1842e-125	3.5473e-123
PGSC0003DMG400008057	311.747	3303.7	-3.4056	3.5096e-125	5.6676e-123
PGSC0003DMG400021191	3486.5	26225.3	-2.9111	6.4292e-125	1.0324e-122
PGSC0003DMG400000025	321.544	3358.18	-3.3846	8.0673e-125	1.2883e-122
PGSC0003DMG400033134	272.803	2979.59	-3.4492	8.3507e-125	1.3261e-122
PGSC0003DMG400033046	73.4695	1394.27	-4.2462	1.1358e-124	1.7936e-122
PGSC0003DMG400000156	915.744	7662.09	-3.0647	2.075e-124	3.2411e-122
PGSC0003DMG400024008	27167.6	195144	-2.8446	2.2781e-124	3.5199e-122
Novel00299	672.453	5901.96	-3.1337	4.7083e-124	7.2357e-122
PGSC0003DMG401016333	2121.32	16149.3	-2.9284	6.047e-124	9.2432e-122
PGSC0003DMG400007782	3829.13	99026.7	-4.6927	1.8333e-123	2.7726e-121
PGSC0003DMG400008187	3837.68	28118.2	-2.8732	3.6398e-123	5.4757e-121
PGSC0003DMG400019361	2324.85	17794.7	-2.9362	1.034e-121	1.5156e-119
PGSC0003DMG401025958	2464.82	18108.3	-2.8771	5.0106e-121	7.2335e-119
PGSC0003DMG400005627	928.213	7466.49	-3.0079	1.6004e-120	2.2873e-118
Novel01072	1878.29	14096.3	-2.9078	3.6981e-120	5.259e-118
PGSC0003DMG400033902	13.6003	734.631	-5.7553	1.3683e-119	1.9362e-117
PGSC0003DMG400007708	332.522	3963.92	-3.5754	4.7752e-119	6.6583e-117
PGSC0003DMG400031444	253.013	2680.18	-3.405	1.8788e-118	2.607e-116
PGSC0003DMG400033567	580.776	5686.79	-3.2916	2.7506e-118	3.7982e-116
PGSC0003DMG400017714	20983.6	141780	-2.7563	5.02e-118	6.8656e-116
PGSC0003DMG400027093	2275.96	16157.3	-2.8276	6.2849e-117	8.4342e-115
PGSC0003DMG400017808	1112.43	8440.28	-2.9236	1.2943e-116	1.7208e-114
PGSC0003DMG400009024	1189.62	8948.69	-2.9112	2.9991e-116	3.9505e-114
PGSC0003DMG400030397	72.3033	1703.57	-4.5584	1.4203e-115	1.837e-113
Novel02805	349.739	3694	-3.4008	1.5068e-115	1.9314e-113
Novel03240	154.524	1912.66	-3.6297	2.2342e-115	2.851e-113
PGSC0003DMG400015318	78.0109	1306.81	-4.0662	2.3063e-115	2.9299e-113
PGSC0003DMG400023837	4381.14	34664	-2.9841	4.5986e-115	5.8162e-113
PGSC0003DMG400024928	1359.56	9996.66	-2.8783	7.3224e-115	9.18e-113
Novel02087	5020.24	33544.3	-2.7402	2.4717e-114	3.0852e-112
Novel02539	26.6507	953.135	-5.1604	3.2147e-114	3.9951e-112
Novel01098	2657.73	18250.7	-2.7797	4.9576e-114	6.0819e-112
PGSC0003DMG400005151	1801.91	12716.4	-2.8191	1.1097e-113	1.3556e-111
Novel03458	6617.46	43845.2	-2.7281	2.3357e-113	2.8171e-111
PGSC0003DMG400011290	4671.67	31233.3	-2.7411	7.7274e-113	9.2033e-111
PGSC0003DMG400026142	4738.24	31185	-2.7184	1.4599e-112	1.7316e-110
PGSC0003DMG400021363	1379.71	9868.7	-2.8385	1.7604e-112	2.0707e-110
PGSC0003DMG400017144	3520.57	23511.7	-2.7395	1.3144e-111	1.5211e-109
PGSC0003DMG400017007	95.5191	1566.45	-4.0356	3.5094e-111	4.0286e-109
PGSC0003DMG400018124	41.7251	957.221	-4.5199	2.7408e-110	3.0844e-108
Novel01563	1237.1	8790.85	-2.829	5.5494e-110	6.1721e-108
PGSC0003DMG400012858	1959.21	13149.6	-2.7467	1.5711e-109	1.7339e-107
PGSC0003DMG400001820	504.407	4087.05	-3.0184	2.0972e-109	2.3056e-107
Novel00759	286.916	2690	-3.2289	7.4995e-109	8.1199e-107
Novel02712	351.681	3111.74	-3.1454	2.5898e-108	2.7935e-106
PGSC0003DMG400000350	1096.03	7729.28	-2.8181	6.0406e-108	6.4668e-106
PGSC0003DMG400026857	1312.32	9042.5	-2.7846	8.8842e-108	9.4756e-106
PGSC0003DMG400015645	653.273	4931.25	-2.9162	2.3632e-107	2.4834e-105
PGSC0003DMG400021726	1647.68	13833	-3.0696	3.6316e-107	3.7885e-105
PGSC0003DMG400008731	174.433	1874.48	-3.4257	1.4209e-105	1.4251e-103
PGSC0003DMG400024891	17395.6	104437	-2.5858	4.3424e-105	4.3249e-103
PGSC0003DMG400009097	1259.15	8450.95	-2.7467	8.7714e-105	8.6456e-103
PGSC0003DMG400017523	2055.87	60799.3	-4.8862	8.96e-105	8.8011e-103
Novel00765	4908.37	29891.5	-2.6064	6.2135e-104	6.0206e-102
PGSC0003DMG400003649	26.9693	768.724	-4.8331	1.231e-103	1.1808e-101
PGSC0003DMG401008870	323.385	2741.89	-3.0838	1.1538e-102	1.0885e-100
Novel02986	13.1996	613.772	-5.5391	1.2016e-102	1.1299e-100
PGSC0003DMG400020446	31992.2	188371	-2.5578	1.2627e-102	1.1834e-100
PGSC0003DMG400024572	1970.85	29103.9	-3.8843	2.3177e-102	2.151e-100
PGSC0003DMG400014387	3011.92	18355.3	-2.6074	6.2418e-102	5.7368e-100
PGSC0003DMG400025737	49.2633	933.282	-4.2437	2.0388e-101	1.8559e-99
PGSC0003DMG400015370	204.854	1998.26	-3.2861	2.2453e-101	2.0375e-99
PGSC0003DMG400019257	493.176	3683.73	-2.901	8.9231e-101	7.9955e-99
Novel02835	1586.18	9969.55	-2.652	1.0349e-100	9.244e-99
PGSC0003DMG400002995	1717.09	12432.1	-2.856	4.6563e-100	4.0953e-98
PGSC0003DMG400006349	4253.92	25171.8	-2.5649	8.2651e-100	7.2469e-98
Novel02852	292.039	2871.3	-3.2975	8.9099e-100	7.7884e-98
PGSC0003DMG400002479	2178.66	53064.4	-4.6062	6.1274e-99	5.3236e-97
PGSC0003DMG400028735	5581.87	32353	-2.5351	6.822e-99	5.9091e-97
PGSC0003DMG400023198	357.313	2836.71	-2.989	1.927e-98	1.6442e-96
PGSC0003DMG402031520	16.9501	622.398	-5.1985	1.2277e-97	1.0325e-95
Novel01420	826.407	5471.5	-2.727	1.401e-97	1.171e-95
PGSC0003DMG401028788	1157.64	11122.3	-3.2642	1.8457e-97	1.5337e-95
PGSC0003DMG400008988	4673.05	56019.8	-3.5835	2.2152e-97	1.8354e-95
PGSC0003DMG400012549	2304.93	13682.2	-2.5695	2.9063e-97	2.401e-95
Novel03506	14760.8	82643.4	-2.4851	3.2153e-97	2.6486e-95
PGSC0003DMG400001361	307.243	2489.58	-3.0184	1.0805e-96	8.8245e-95
Novel01839	385.154	2947.09	-2.9358	1.5857e-96	1.2913e-94
PGSC0003DMG400027601	25.6376	695.461	-4.7616	1.6491e-96	1.3354e-94
PGSC0003DMG400023622	175.194	1713.3	-3.2898	1.775e-96	1.4332e-94
PGSC0003DMG400031761	1628.16	17678.3	-3.4407	3.0816e-96	2.4674e-94
PGSC0003DMG400019671	112.624	1369.07	-3.6036	4.2252e-96	3.3641e-94
PGSC0003DMG400014182	2466.38	14307.3	-2.5363	5.3942e-96	4.283e-94
Novel01559	1018.53	6439.51	-2.6605	9.0874e-96	7.1755e-94
PGSC0003DMG400008223	504.986	3566.88	-2.8203	2.9537e-95	2.3068e-93
PGSC0003DMG400012619	193.205	1793.3	-3.2144	3.0586e-95	2.3822e-93
PGSC0003DMG400032553	442.08	3223.55	-2.8663	4.0199e-95	3.1056e-93
PGSC0003DMG400012579	5554.37	31096	-2.485	5.5498e-95	4.2759e-93
PGSC0003DMG400022615	2137.42	12363.2	-2.5321	1.5312e-94	1.1609e-92
PGSC0003DMG400012195	113.832	1314.22	-3.5292	1.6259e-94	1.2295e-92
PGSC0003DMG400014440	583.692	3961.22	-2.7627	3.3801e-94	2.5425e-92
PGSC0003DMG400024911	1261.25	7611.68	-2.5934	3.8681e-94	2.902e-92
PGSC0003DMG400003565	22.7674	651.162	-4.838	5.7043e-94	4.2684e-92
PGSC0003DMG400012306	12265.6	66367.4	-2.4359	9.8414e-94	7.3067e-92
PGSC0003DMG400011191	8.50079	500.293	-5.879	1.098e-93	8.1308e-92
PGSC0003DMG400027178	1853.73	10733.7	-2.5336	1.2882e-93	9.4936e-92
PGSC0003DMG400011999	494.29	3633.5	-2.8779	1.2887e-93	9.4936e-92
PGSC0003DMG400005820	860.409	5454.17	-2.6643	2.2678e-93	1.6579e-91
PGSC0003DMG400014382	1821.25	10543.3	-2.5333	3.9276e-93	2.835e-91
PGSC0003DMG400000702	1605.84	9328.53	-2.5383	1.3748e-92	9.8734e-91
Novel02049	231.835	1985.63	-3.0984	3.0871e-92	2.1951e-90
PGSC0003DMG400010235	7621.65	40564.9	-2.4121	1.25e-91	8.8222e-90
PGSC0003DMG400009509	6224.95	33477	-2.427	1.7164e-91	1.2084e-89
PGSC0003DMG400012445	25537.7	134242	-2.3941	3.3992e-91	2.3698e-89
PGSC0003DMG400019208	47467.5	248386	-2.3876	4.0673e-91	2.8219e-89
PGSC0003DMG400019362	3010.23	16439.6	-2.4492	6.8802e-91	4.7388e-89
PGSC0003DMG400019409	528.963	3534.17	-2.7401	9.4544e-91	6.4963e-89
PGSC0003DMG400014179	1885.44	12774.4	-2.7603	1.8034e-90	1.2273e-88
PGSC0003DMG403008663	144.661	1442.28	-3.3176	1.9322e-90	1.3119e-88
PGSC0003DMG400016130	2046.58	13236	-2.6932	2.5654e-90	1.7336e-88
PGSC0003DMG400003059	1344.72	7766.48	-2.53	5.7246e-90	3.8501e-88
PGSC0003DMG400030475	11835.2	61174.9	-2.3698	6.63e-90	4.4382e-88
PGSC0003DMG400001417	91.5992	1114.3	-3.6047	8.2052e-90	5.4799e-88
PGSC0003DMG400028505	105.833	3676.47	-5.1185	8.4291e-90	5.6163e-88
PGSC0003DMG400016990	667.854	4230.16	-2.6631	9.1259e-90	6.0664e-88
PGSC0003DMG401031322	1900	10602.1	-2.4803	1.1963e-89	7.9156e-88
PGSC0003DMG400010008	2263.5	12434.3	-2.4577	2.9907e-89	1.9697e-87
Novel00310	11411	58878.9	-2.3673	1.4801e-88	9.6153e-87
PGSC0003DMG400009894	4276.32	22289.8	-2.3819	5.8602e-88	3.7224e-86
PGSC0003DMG400019504	1302.84	7381.62	-2.5023	6.1927e-88	3.9249e-86
Novel01092	39.9872	741.071	-4.212	7.0812e-88	4.4781e-86
Novel02856	2155.52	14754.3	-2.775	1.112e-87	7.0014e-86
Novel03017	816.098	4879.92	-2.58	1.5297e-87	9.589e-86
PGSC0003DMG400030542	148.07	1407.25	-3.2485	3.0967e-87	1.9327e-85
Novel00832	9412.38	47974.3	-2.3496	3.6595e-87	2.2789e-85
PGSC0003DMG400031797	1870.03	10246.7	-2.454	4.8512e-87	3.008e-85
PGSC0003DMG400018169	115.725	1645.38	-3.8297	5.8501e-87	3.6116e-85
PGSC0003DMG401029567	3819.58	27172.8	-2.8307	6.6812e-87	4.1158e-85
Novel02790	21.175	721.132	-5.0898	7.3924e-87	4.5442e-85
PGSC0003DMG400011719	439.614	6072.95	-3.7881	8.4221e-87	5.155e-85
PGSC0003DMG402025899	176.416	1570.42	-3.1541	1.6023e-86	9.7449e-85
PGSC0003DMG400023125	2.89567	609.569	-7.7177	1.8057e-86	1.0958e-84
PGSC0003DMG400012312	1738.7	9403.11	-2.4351	2.0916e-86	1.2667e-84
PGSC0003DMG400017192	457.704	4371.52	-3.2556	2.6086e-86	1.5764e-84
PGSC0003DMG401002683	515.981	3327.74	-2.6892	4.51e-86	2.7197e-84
PGSC0003DMG400029301	11955.8	59330.6	-2.3111	4.8948e-86	2.9455e-84
PGSC0003DMG400030089	1932.35	10340.5	-2.4199	5.1252e-86	3.0777e-84
PGSC0003DMG400007859	8293.77	41981.7	-2.3397	5.9024e-86	3.537e-84
PGSC0003DMG400023908	5528.42	28087.4	-2.345	6.1688e-86	3.6889e-84
Novel03376	15.8083	535.388	-5.0818	8.7449e-86	5.2076e-84
PGSC0003DMG402025662	825.828	4852.17	-2.5547	1.0463e-85	6.2046e-84
PGSC0003DMG400007677	17855.8	112651	-2.6574	1.2559e-85	7.4323e-84
PGSC0003DMG400014266	3677.91	18915.9	-2.3626	1.6017e-85	9.4399e-84
PGSC0003DMG400005573	555.561	3518.42	-2.6629	2.0422e-85	1.1986e-83
PGSC0003DMG400024885	996.183	5685.09	-2.5127	2.3295e-85	1.3644e-83
PGSC0003DMG400020572	36.1511	692.061	-4.2588	3.5525e-85	2.0723e-83
PGSC0003DMG401025733	5620.63	28115.7	-2.3226	4.1869e-85	2.4325e-83
Novel03464	4259.3	21614	-2.3433	4.2002e-85	2.4353e-83
PGSC0003DMG400003001	6082.8	30564.2	-2.329	5.1472e-85	2.9663e-83
Novel03362	296.498	7184.25	-4.5987	6.7263e-85	3.8685e-83
Novel01639	5195.66	26035.8	-2.3251	7.9621e-85	4.5701e-83
Novel02220	17725.9	86816.4	-2.2921	3.9879e-84	2.2707e-82
PGSC0003DMG401020927	3.40442	1315.43	-8.5939	4.3497e-84	2.4718e-82
PGSC0003DMG400012587	135.148	1293.67	-3.2589	6.2738e-84	3.5511e-82
PGSC0003DMG400000079	92110.5	505733	-2.4569	7.9839e-84	4.5012e-82
PGSC0003DMG402005720	687.681	4079.94	-2.5687	9.2373e-84	5.1976e-82
PGSC0003DMG400004691	1366.9	7344.82	-2.4258	1.3328e-83	7.4698e-82
Novel00465	355.498	2431.74	-2.7741	1.5278e-83	8.5297e-82
PGSC0003DMG402026315	567.487	5780.67	-3.3486	2.3376e-83	1.2974e-81
PGSC0003DMG401029469	1064.24	7850.67	-2.883	2.377e-83	1.3168e-81
PGSC0003DMG402019343	38.8047	697.085	-4.167	2.4363e-83	1.347e-81
Novel00393	1583.26	8389.32	-2.4057	3.0146e-83	1.6603e-81
PGSC0003DMG400023950	2666.1	13625.3	-2.3535	5.6369e-83	3.0867e-81
PGSC0003DMG400030948	74.9505	937.202	-3.6444	7.8584e-83	4.2786e-81
PGSC0003DMG400005738	416.339	3203.39	-2.9438	8.9131e-83	4.8344e-81
Novel00678	126.601	1208.15	-3.2544	9.2246e-82	4.892e-80
PGSC0003DMG400025822	591.644	3520.66	-2.573	2.1409e-81	1.1312e-79
Novel03282	1459.88	7570.6	-2.3746	3.0341e-81	1.5972e-79
PGSC0003DMG400021877	157.373	9769.74	-5.9561	3.4256e-81	1.7999e-79
PGSC0003DMG400030688	303.027	31737.2	-6.7106	4.2226e-81	2.2146e-79
PGSC0003DMG400020231	2674.51	13293.9	-2.3134	4.3275e-81	2.2655e-79
PGSC0003DMG400003243	58.3484	6734.94	-6.8508	4.6542e-81	2.4321e-79
PGSC0003DMG400000444	4339.21	28762.4	-2.7287	6.1609e-81	3.2136e-79
PGSC0003DMG400030991	56.3834	1378.78	-4.612	1.9976e-80	1.0326e-78
Novel03606	3633.28	17520.1	-2.2697	2.6968e-80	1.3864e-78
PGSC0003DMG401012656	597.503	3533.1	-2.5639	3.9394e-80	2.0144e-78
PGSC0003DMG400000409	3980.57	19161.4	-2.2672	3.9736e-80	2.0282e-78
PGSC0003DMG400023496	5891.92	28208.5	-2.2593	6.0353e-80	3.0751e-78
PGSC0003DMG400010746	285.332	2013.15	-2.8187	1.548e-79	7.8041e-78
PGSC0003DMG400027848	3828.74	18313.1	-2.2579	2.0964e-79	1.0531e-77
PGSC0003DMG400004088	2312.42	11335.3	-2.2933	3.2748e-79	1.6422e-77
PGSC0003DMG400003597	429.016	3680.52	-3.1008	3.7975e-79	1.901e-77
PGSC0003DMG400000189	1051.98	5591.32	-2.4101	5.4413e-79	2.7097e-77
Novel01823	180.835	2404.33	-3.7329	5.673e-79	2.8201e-77
PGSC0003DMG400002226	1051.49	5542.97	-2.3982	6.9493e-79	3.4426e-77
PGSC0003DMG400028533	345.55	2255.94	-2.7068	7.0826e-79	3.5026e-77
Novel01901	3239.82	15488.3	-2.2572	8.064e-79	3.9742e-77
Novel00912	1361.25	6943.87	-2.3508	2.1765e-78	1.0671e-76
PGSC0003DMG400023703	544.572	7265.65	-3.7379	2.9416e-78	1.4373e-76
Novel02519	62.6498	805.357	-3.6842	3.0463e-78	1.4859e-76
PGSC0003DMG400009046	1111.68	5804.09	-2.3843	3.9087e-78	1.9034e-76
PGSC0003DMG400021448	5937.84	27369.6	-2.2046	7.3057e-78	3.5454e-76
PGSC0003DMG400026818	4101.3	19343.3	-2.2377	1.2356e-77	5.946e-76
PGSC0003DMG400033350	560.96	3238.59	-2.5294	1.3645e-77	6.5441e-76
PGSC0003DMG400004865	4067.78	19047.7	-2.2273	1.7419e-77	8.3401e-76
PGSC0003DMG400031391	22902.4	103999	-2.183	2.1098e-77	1.0085e-75
PGSC0003DMG403025785	260.674	1826.01	-2.8084	2.8274e-77	1.347e-75
PGSC0003DMG400023617	3180.44	17868.9	-2.4902	6.4678e-77	3.0558e-75
PGSC0003DMG400003974	236.646	1695.5	-2.8409	1.0113e-76	4.7545e-75
PGSC0003DMG400017951	2.60381	431.716	-7.3733	1.8258e-76	8.5554e-75
Novel00161	453.598	2715.44	-2.5817	2.7288e-76	1.2683e-74
PGSC0003DMG400014323	2283.03	27329.9	-3.5815	2.9616e-76	1.372e-74
PGSC0003DMG400010387	1650.46	8134.97	-2.3013	3.0432e-76	1.4075e-74
PGSC0003DMG400017517	270.321	1839.68	-2.7667	4.4355e-76	2.0482e-74
PGSC0003DMG400010739	1010.59	5191.7	-2.361	5.4255e-76	2.4853e-74
PGSC0003DMG400010741	2005.34	9668.15	-2.2694	7.3071e-76	3.3419e-74
PGSC0003DMG400007195	6106.61	27606.4	-2.1766	1.0635e-75	4.8561e-74
PGSC0003DMG400030513	1101.72	12233.2	-3.473	1.2015e-75	5.4513e-74
PGSC0003DMG400030345	3259.76	15123	-2.2139	1.8188e-75	8.2391e-74
PGSC0003DMG400011980	612.687	3450.64	-2.4936	1.8343e-75	8.2961e-74
PGSC0003DMG401027437	1449.98	7101.21	-2.292	1.8547e-75	8.3752e-74
PGSC0003DMG400029413	1019.23	5185.87	-2.3471	2.3077e-75	1.0388e-73
PGSC0003DMG400004980	460.344	5497.25	-3.5779	4.5261e-75	2.0215e-73
PGSC0003DMG401000007	1289.7	8865.56	-2.7812	5.6095e-75	2.4975e-73
PGSC0003DMG400029109	7.46089	386.825	-5.6962	6.0582e-75	2.6931e-73
PGSC0003DMG400017054	294.204	1937.56	-2.7194	9.5427e-75	4.2159e-73
PGSC0003DMG400014826	2189.44	10278.3	-2.231	1.1879e-74	5.2239e-73
Novel02908	799.55	4176.53	-2.385	2.3964e-74	1.0474e-72
PGSC0003DMG400004532	167.059	1315.03	-2.9767	3.4611e-74	1.5081e-72
PGSC0003DMG402021462	165.494	1607.34	-3.2798	3.5706e-74	1.5535e-72
Novel02289	214.038	1537.42	-2.8446	3.5961e-74	1.5622e-72
PGSC0003DMG400027733	12405.6	54223.3	-2.1279	4.2735e-74	1.8536e-72
PGSC0003DMG400026479	501.741	4554.96	-3.1824	4.5502e-74	1.9677e-72
PGSC0003DMG400028197	9503.72	54214.7	-2.5121	8.4338e-74	3.6306e-72
PGSC0003DMG400012049	6.21592	367.016	-5.8837	9.9832e-74	4.2847e-72
PGSC0003DMG400011500	4210.33	18933.4	-2.1689	1.9492e-73	8.2786e-72
PGSC0003DMG400011627	240.292	1659.3	-2.7877	3.411e-73	1.4466e-71
PGSC0003DMG400019371	1864.19	11064.5	-2.5693	4.264e-73	1.8003e-71
PGSC0003DMG400006825	444.116	2569.46	-2.5325	6.4652e-73	2.7137e-71
Novel01963	154.683	1233.81	-2.9957	6.7835e-73	2.839e-71
Novel02082	2194.45	10106.4	-2.2033	7.7003e-73	3.2179e-71
PGSC0003DMG400015385	1543.04	7284.1	-2.239	9.9901e-73	4.1687e-71
Novel02724	1703.34	7945.05	-2.2217	1.8786e-72	7.8161e-71
PGSC0003DMG400023838	2173.52	10019.7	-2.2047	2.3218e-72	9.6461e-71
PGSC0003DMG400022494	321.398	2002.63	-2.6395	2.6852e-72	1.1107e-70
PGSC0003DMG401014619	237.674	1617.25	-2.7665	3.5279e-72	1.453e-70
PGSC0003DMG400032162	26.2983	525.37	-4.3203	7.6068e-72	3.1195e-70
PGSC0003DMG400002987	1192.95	5791.57	-2.2794	8.4694e-72	3.4683e-70
PGSC0003DMG400011136	6124.68	29929.4	-2.2889	1.3793e-71	5.6081e-70
PGSC0003DMG400026732	459.857	3985.62	-3.1155	2.1929e-71	8.9037e-70
Novel02366	203.973	1438.12	-2.8177	2.4274e-71	9.8278e-70
PGSC0003DMG400000525	966.995	4726.17	-2.2891	4.4836e-71	1.8077e-69
Novel02230	1115.43	5349.58	-2.2618	4.4839e-71	1.8077e-69
Novel01181	4040.28	17770	-2.1369	5.8019e-71	2.3325e-69
PGSC0003DMG401008054	491.244	2712.68	-2.4652	1.0729e-70	4.2953e-69
PGSC0003DMG400019106	187.488	2134.18	-3.5088	1.1658e-70	4.6604e-69
PGSC0003DMG400006371	1099.79	5253.09	-2.2559	2.0618e-70	8.1739e-69
Novel03642	30.2182	640.594	-4.4059	3.1573e-70	1.2431e-68
PGSC0003DMG400003770	770.474	3872.21	-2.3293	3.2691e-70	1.2853e-68
PGSC0003DMG400014180	394.102	2339.07	-2.5693	3.3906e-70	1.3313e-68
PGSC0003DMG400030426	2928.48	12822.6	-2.1305	4.3624e-70	1.7105e-68
PGSC0003DMG400014787	464.895	2546.36	-2.4535	5.1778e-70	2.0274e-68
PGSC0003DMG400019461	50.2104	664.919	-3.7271	7.4037e-70	2.8911e-68
Novel01663	2969.64	25680.7	-3.1123	9.9603e-70	3.8841e-68
PGSC0003DMG400001593	9832.9	41484.6	-2.0769	1.0497e-69	4.0879e-68
PGSC0003DMG400018403	949.417	4580.68	-2.2704	1.2558e-69	4.8704e-68
PGSC0003DMG400016448	11556.6	48777.4	-2.0775	1.4809e-69	5.7201e-68
PGSC0003DMG400004314	8567.54	35979	-2.0702	1.4897e-69	5.7467e-68
PGSC0003DMG400000131	400.428	2744.96	-2.7772	1.9578e-69	7.542e-68
PGSC0003DMG400026963	10959.3	46004.1	-2.0696	2.1111e-69	8.1216e-68
PGSC0003DMG400023451	9143.78	40095.5	-2.1326	2.233e-69	8.5674e-68
PGSC0003DMG400016363	936.776	4533.42	-2.2748	2.3466e-69	8.9913e-68
PGSC0003DMG400025652	237.97	1566.03	-2.7183	3.5579e-69	1.356e-67
Novel01876	1646.24	7424.34	-2.1731	3.5695e-69	1.3586e-67
PGSC0003DMG400018570	121.901	1025.24	-3.0722	3.8915e-69	1.4792e-67
Novel00415	238.292	1568.77	-2.7188	4.8238e-69	1.8287e-67
PGSC0003DMG400024704	1461.97	8429.3	-2.5275	1.0456e-68	3.9326e-67
PGSC0003DMG400012099	1816.1	8113.74	-2.1595	1.1536e-68	4.3331e-67
Novel02555	141.142	1272.34	-3.1723	1.2049e-68	4.5198e-67
Novel00274	29.1747	523.379	-4.1651	1.6223e-68	6.0777e-67
Novel00607	279.129	1723.95	-2.6267	1.7669e-68	6.6105e-67
PGSC0003DMG400030186	654.917	4524.19	-2.7883	2.1264e-68	7.935e-67
PGSC0003DMG400017294	104.024	985.711	-3.2443	2.6655e-68	9.9336e-67
PGSC0003DMG400004498	7780.91	32293.6	-2.0532	3.1504e-68	1.1725e-66
PGSC0003DMG400012857	906.282	4367.66	-2.2688	3.3096e-68	1.2286e-66
Novel00449	8479.65	35083.9	-2.0487	4.0728e-68	1.508e-66
PGSC0003DMG400012003	14341.1	58814.7	-2.036	4.2021e-68	1.5539e-66
PGSC0003DMG400027750	6853.21	28453.7	-2.0538	5.4046e-68	1.9908e-66
PGSC0003DMG400003722	1241.55	5694.8	-2.1975	5.6428e-68	2.0758e-66
PGSC0003DMG402000007	1235.98	7551.65	-2.6111	5.9756e-68	2.1955e-66
PGSC0003DMG403025662	829.987	4015.01	-2.2742	6.3287e-68	2.3192e-66
Novel02290	3207.3	13641.1	-2.0885	9.9436e-68	3.6253e-66
PGSC0003DMG400009512	2082.2	48112.1	-4.5302	9.964e-68	3.6281e-66
PGSC0003DMG400029846	789.667	3820.02	-2.2743	1.0489e-67	3.8146e-66
PGSC0003DMG400031865	3461.37	14704.8	-2.0869	1.1555e-67	4.1968e-66
Novel03026	1596.23	7145.93	-2.1625	1.2516e-67	4.5399e-66
PGSC0003DMG400014162	22.0391	467.964	-4.4083	1.8487e-67	6.6977e-66
Novel02618	1278.39	5789.11	-2.179	2.2617e-67	8.1834e-66
Novel01238	546.385	2829	-2.3723	3.1834e-67	1.1431e-65
PGSC0003DMG400025149	489.534	2565.32	-2.3897	5.4311e-67	1.9405e-65
PGSC0003DMG402026018	312.12	1842.59	-2.5616	5.4941e-67	1.9606e-65
PGSC0003DMG400021160	3479.66	14599.1	-2.0689	7.09e-67	2.5269e-65
PGSC0003DMG400027646	408.48	2241.87	-2.4564	8.3394e-67	2.9649e-65
PGSC0003DMG400007354	4111.45	17160.4	-2.0614	1.0013e-66	3.551e-65
PGSC0003DMG400017216	1468.56	6515.86	-2.1496	1.0335e-66	3.6606e-65
Novel01003	4569.67	18857.8	-2.045	1.17e-66	4.1339e-65
PGSC0003DMG400030865	1718.95	7565.23	-2.1379	1.3578e-66	4.7916e-65
PGSC0003DMG400024968	265.878	1624.25	-2.6109	1.931e-66	6.789e-65
PGSC0003DMG400018003	536.787	2745.73	-2.3548	2.0394e-66	7.1615e-65
Novel02150	1585.89	11597.1	-2.8704	2.679e-66	9.3729e-65
PGSC0003DMG400011574	575.443	2899.35	-2.333	3.034e-66	1.0589e-64
PGSC0003DMG400011105	390.851	2149.82	-2.4595	3.058e-66	1.066e-64
PGSC0003DMG400007896	502.868	3379.56	-2.7486	3.2604e-66	1.1351e-64
PGSC0003DMG400005746	2752.42	11548.8	-2.069	4.49e-66	1.5613e-64
PGSC0003DMG400017407	324.026	1870.82	-2.5295	5.4786e-66	1.8959e-64
PGSC0003DMG400014982	134.76	1049.93	-2.9618	6.7321e-66	2.3212e-64
PGSC0003DMG400030792	802.422	3801.73	-2.2442	7.613e-66	2.6187e-64
PGSC0003DMG400012277	337.832	1922.9	-2.5089	9.006e-66	3.0904e-64
PGSC0003DMG400018333	958.561	4409.46	-2.2017	1.0044e-65	3.4384e-64
PGSC0003DMG400030511	180.512	1244.6	-2.7855	1.0067e-65	3.4421e-64
PGSC0003DMG400010128	2642.88	74149.2	-4.8102	1.1407e-65	3.8908e-64
PGSC0003DMG400028690	1336.84	5926.87	-2.1484	1.2438e-65	4.2375e-64
PGSC0003DMG400009079	3656.16	15084.5	-2.0447	1.6797e-65	5.7157e-64
PGSC0003DMG400013808	613.881	3033.82	-2.3051	3.8157e-65	1.2892e-63
Novel00953	947.803	4615.12	-2.2837	4.4678e-65	1.5007e-63
PGSC0003DMG401001610	434.976	2300.1	-2.4027	5.2334e-65	1.7537e-63
PGSC0003DMG400025858	4.28377	300.643	-6.133	6.3688e-65	2.1292e-63
PGSC0003DMG400029059	1623.78	7028.15	-2.1138	7.4007e-65	2.4655e-63
PGSC0003DMG400010609	157.528	1137.97	-2.8528	7.611e-65	2.5326e-63
PGSC0003DMG400025169	277.458	2123.27	-2.9359	8.8387e-65	2.9377e-63
PGSC0003DMG400023979	296.137	10554.7	-5.1555	1.1865e-64	3.9344e-63
PGSC0003DMG400028094	11.0928	506.388	-5.5126	1.2093e-64	4.0054e-63
Novel01732	619.661	3035.27	-2.2923	1.3442e-64	4.447e-63
PGSC0003DMG400023635	839.545	6757.68	-3.0088	1.6992e-64	5.6087e-63
PGSC0003DMG400012568	1934.4	8154.63	-2.0757	2.664e-64	8.7426e-63
PGSC0003DMG400018983	16.7894	412.285	-4.618	3.0996e-64	1.0149e-62
PGSC0003DMG400014257	151.438	1098.75	-2.8591	3.938e-64	1.285e-62
PGSC0003DMG401025870	3039.52	12354.8	-2.0232	5.2324e-64	1.7035e-62
PGSC0003DMG400042500	245.631	1513.08	-2.6229	6.6639e-64	2.1645e-62
PGSC0003DMG400022707	11955	46855.9	-1.9706	7.3573e-64	2.3871e-62
PGSC0003DMG400029229	211.615	1366.22	-2.6907	9.131e-64	2.9592e-62
PGSC0003DMG400028257	401.687	2143.26	-2.4157	1.0818e-63	3.4981e-62
PGSC0003DMG400016218	601.539	3252.54	-2.4348	1.2335e-63	3.984e-62
Novel01041	602.913	5691.13	-3.2387	1.8519e-63	5.9545e-62
PGSC0003DMG402020702	588.618	2875.55	-2.2884	1.8896e-63	6.0689e-62
PGSC0003DMG400034487	2453.87	17879.8	-2.8652	2.1279e-63	6.8188e-62
PGSC0003DMG400007094	1157.5	5082.46	-2.1345	2.2026e-63	7.0425e-62
PGSC0003DMG400003918	570.33	2781.52	-2.286	5.4814e-63	1.7428e-61
PGSC0003DMG400027651	683.389	3752.6	-2.4571	8.416e-63	2.6611e-61
PGSC0003DMG400006100	1725.83	7181.72	-2.057	8.4923e-63	2.6823e-61
PGSC0003DMG400026864	30.3923	489.617	-4.0099	1.0349e-62	3.2579e-61
Novel01215	247.285	1570.52	-2.667	1.4787e-62	4.6397e-61
PGSC0003DMG400016726	20607.4	79620.5	-1.95	2.0631e-62	6.4592e-61
Novel01414	4864.28	28594.3	-2.5554	2.0703e-62	6.4746e-61
PGSC0003DMG400015380	681.191	3168.29	-2.2176	2.8134e-62	8.7505e-61
PGSC0003DMG400013167	143.909	1039.61	-2.8528	3.1339e-62	9.7368e-61
PGSC0003DMG400019793	36.0475	519.6	-3.8494	3.2899e-62	1.0211e-60
PGSC0003DMG400001753	255.066	1498.79	-2.5549	3.8836e-62	1.2027e-60
Novel01912	1328.51	5673.09	-2.0943	3.9672e-62	1.2273e-60
PGSC0003DMG400028624	2982.67	14873.8	-2.3181	4.0925e-62	1.2633e-60
Novel02987	593.451	2822.67	-2.2499	4.3395e-62	1.3381e-60
PGSC0003DMG400014798	36.6566	519.133	-3.824	5.4153e-62	1.6662e-60
PGSC0003DMG400010082	109.934	880.831	-3.0022	7.2326e-62	2.2206e-60
Novel02530	365.019	1951.36	-2.4184	9.0495e-62	2.7636e-60
PGSC0003DMG401022041	452.19	2277.77	-2.3326	1.5732e-61	4.7736e-60
PGSC0003DMG400010893	970.368	5965.65	-2.6201	2.0891e-61	6.3192e-60
PGSC0003DMG400012110	3580.94	68045.8	-4.2481	2.6951e-61	8.1261e-60
PGSC0003DMG400023271	202.106	1271.78	-2.6537	3.0837e-61	9.2882e-60
PGSC0003DMG400027878	2439.95	12090.7	-2.309	3.4429e-61	1.0359e-59
PGSC0003DMG400005704	3291.53	12947.5	-1.9758	3.5879e-61	1.0784e-59
PGSC0003DMG400008501	2572.04	10295.8	-2.0011	3.9796e-61	1.1936e-59
PGSC0003DMG400027986	3226.97	12673.2	-1.9735	4.5617e-61	1.3668e-59
PGSC0003DMG400007752	279.991	1587.79	-2.5036	4.9771e-61	1.4897e-59
Novel03150	124.592	944.224	-2.9219	5.9019e-61	1.7628e-59
Novel00247	75.0473	713.059	-3.2481	9.0642e-61	2.7017e-59
PGSC0003DMG402027437	680.331	3125.61	-2.1998	1.0521e-60	3.1325e-59
PGSC0003DMG400023329	56.9556	629.629	-3.4666	1.5605e-60	4.6176e-59
Novel02486	1906.52	7652.34	-2.005	2.1647e-60	6.3855e-59
PGSC0003DMG400002210	6074.49	23012.8	-1.9216	2.5421e-60	7.491e-59
PGSC0003DMG401020301	6237.94	23876.2	-1.9364	2.8885e-60	8.503e-59
PGSC0003DMG400012450	1042.98	4470.54	-2.0997	3.0343e-60	8.9231e-59
PGSC0003DMG400004617	155.939	1236.36	-2.987	3.0714e-60	9.0228e-59
PGSC0003DMG400030674	236.076	1385.62	-2.5532	3.0833e-60	9.0486e-59
PGSC0003DMG400003047	43.4817	582.651	-3.7442	5.2404e-60	1.5332e-58
PGSC0003DMG400009941	43.1448	584.319	-3.7595	5.2594e-60	1.5372e-58
PGSC0003DMG400010587	1303.99	5446.55	-2.0624	6.4867e-60	1.8882e-58
PGSC0003DMG400012111	4148.78	38331	-3.2078	7.4372e-60	2.1626e-58
PGSC0003DMG400000003	29.5111	461.314	-3.9664	7.5237e-60	2.1856e-58
Novel01117	2199.97	8740.69	-1.9903	7.5537e-60	2.192e-58
PGSC0003DMG400026460	973.553	4206.31	-2.1112	8.2451e-60	2.3854e-58
Novel02929	1112.74	4681.22	-2.0728	8.7159e-60	2.5191e-58
Novel01571	2252.31	8893.44	-1.9813	1.1138e-59	3.2157e-58
Novel00555	20.2795	866.896	-5.4178	1.3645e-59	3.9043e-58
Novel00940	1315.17	5425.52	-2.0445	1.5405e-59	4.3989e-58
PGSC0003DMG400009208	220.514	3325.62	-3.9147	2.6685e-59	7.5822e-58
PGSC0003DMG400028228	296.919	2043.75	-2.7831	2.7248e-59	7.7345e-58
PGSC0003DMG400025977	1140.4	4936.99	-2.1141	3.3362e-59	9.4511e-58
PGSC0003DMG401000029	5555.68	20920.6	-1.9129	3.4694e-59	9.8187e-58
PGSC0003DMG400030420	9694.63	36274.7	-1.9037	3.8402e-59	1.0847e-57
PGSC0003DMG401007274	1563.67	6314.6	-2.0138	4.3776e-59	1.234e-57
PGSC0003DMG400024573	1698.36	12899.6	-2.9251	4.6538e-59	1.3106e-57
Novel03226	1300.9	5355.08	-2.0414	5.1888e-59	1.4598e-57
Novel02347	5161.37	19364.1	-1.9076	6.9188e-59	1.9408e-57
Novel02934	25.0325	431.083	-4.1061	8.8001e-59	2.4637e-57
Novel01025	6204.66	23135.7	-1.8987	1.3254e-58	3.6924e-57
PGSC0003DMG400024476	46.0798	554.649	-3.5894	1.6223e-58	4.4977e-57
PGSC0003DMG402003745	402.869	1995.98	-2.3087	1.6398e-58	4.5419e-57
PGSC0003DMG400013852	17.101	376.841	-4.4618	1.9879e-58	5.4901e-57
PGSC0003DMG400025468	3.19533	258.154	-6.3361	2.5211e-58	6.956e-57
PGSC0003DMG400019637	7086.51	26353.1	-1.8948	2.8262e-58	7.7902e-57
PGSC0003DMG402001347	209.488	1252.46	-2.5798	3.7148e-58	1.02e-56
Novel01512	202.868	1223.57	-2.5925	4.5378e-58	1.2424e-56
PGSC0003DMG400020065	2216.79	8591.63	-1.9545	4.6755e-58	1.2789e-56
PGSC0003DMG400016101	1850.44	7308.75	-1.9818	4.9627e-58	1.3562e-56
PGSC0003DMG400005188	658.364	4043.77	-2.6187	5.8494e-58	1.5954e-56
PGSC0003DMG400003942	1066.47	4409.16	-2.0477	6.15e-58	1.6758e-56
PGSC0003DMG400018607	351.689	1798.92	-2.3548	6.8224e-58	1.8555e-56
PGSC0003DMG400026100	1299.38	7253.98	-2.4809	7.6475e-58	2.0759e-56
PGSC0003DMG400019273	359.297	1810.54	-2.3332	9.3077e-58	2.5242e-56
PGSC0003DMG401015329	477.406	2260.2	-2.2432	1.1184e-57	3.0273e-56
PGSC0003DMG400029107	5408.07	20078.1	-1.8924	1.1291e-57	3.0534e-56
PGSC0003DMG400024926	2096.46	8141.62	-1.9574	1.3509e-57	3.6498e-56
Novel02700	600.957	2687.15	-2.1607	1.7707e-57	4.7568e-56
Novel00842	72.0183	781.027	-3.4389	1.9675e-57	5.2808e-56
PGSC0003DMG400006047	841.675	3571.92	-2.0854	2.1739e-57	5.8291e-56
Novel00840	836.538	4500.77	-2.4277	2.5457e-57	6.8198e-56
PGSC0003DMG400029829	12849.7	46699.4	-1.8617	2.9875e-57	7.9734e-56
PGSC0003DMG400000323	440.22	2103.19	-2.2563	3.446e-57	9.18e-56
PGSC0003DMG400012631	193.952	4015.2	-4.3717	3.5311e-57	9.3978e-56
PGSC0003DMG400025361	236.858	4323.71	-4.1902	3.842e-57	1.0216e-55
Novel03550	1140.51	4639.89	-2.0244	4.8445e-57	1.2822e-55
Novel01216	1233.28	4952.76	-2.0057	4.9823e-57	1.3174e-55
Novel00462	2211.65	8446.68	-1.9333	5.6509e-57	1.4928e-55
PGSC0003DMG400021354	1006.69	4132.81	-2.0375	5.6921e-57	1.5023e-55
PGSC0003DMG401029471	1672.76	7866.76	-2.2335	6.0442e-57	1.5938e-55
Novel02611	860.817	3603.77	-2.0657	7.1831e-57	1.8924e-55
PGSC0003DMG400001862	688.978	4126.92	-2.5825	9.1427e-57	2.4064e-55
PGSC0003DMG400004655	704.362	3993.05	-2.5031	1.2965e-56	3.403e-55
PGSC0003DMG400031476	366.559	1833.94	-2.3228	1.7741e-56	4.6437e-55
PGSC0003DMG400009431	3860.07	14315.1	-1.8908	2.0576e-56	5.376e-55
PGSC0003DMG400030929	313.87	1614.7	-2.363	2.1802e-56	5.6861e-55
PGSC0003DMG400008078	5079.44	22109.6	-2.1219	2.2878e-56	5.9557e-55
Novel01569	886.222	3685.52	-2.0561	2.4933e-56	6.4849e-55
PGSC0003DMG400020613	342.067	1728.11	-2.3368	2.7499e-56	7.1327e-55
PGSC0003DMG400016236	1179.25	4752.97	-2.011	2.9558e-56	7.6598e-55
Novel00294	5194.58	18915.3	-1.8645	3.1911e-56	8.2622e-55
PGSC0003DMG400031050	439.08	2078.82	-2.2432	3.4336e-56	8.882e-55
PGSC0003DMG400029019	2631.56	9853.46	-1.9047	3.5088e-56	9.0683e-55
Novel01052	3352.13	21758.7	-2.6984	3.6335e-56	9.3822e-55
PGSC0003DMG400021737	1004.41	4102.65	-2.0302	3.6599e-56	9.4419e-55
PGSC0003DMG400022766	1127.44	4541.55	-2.0101	3.9513e-56	1.0184e-54
PGSC0003DMG400026583	881.494	3655.19	-2.0519	4.3038e-56	1.1063e-54
PGSC0003DMG400008917	70107	249296	-1.8302	5.0245e-56	1.2892e-54
PGSC0003DMG400004963	89.6582	737.781	-3.0407	6.4266e-56	1.6446e-54
PGSC0003DMG400019480	488.473	2254.78	-2.2066	6.6653e-56	1.7041e-54
PGSC0003DMG400000344	3295.2	12136.4	-1.8809	7.8655e-56	2.0074e-54
PGSC0003DMG400030977	7513.78	26827	-1.8361	1.3018e-55	3.3106e-54
PGSC0003DMG400024759	2744.38	10160.2	-1.8884	1.3992e-55	3.5489e-54
PGSC0003DMG400004151	1300.33	13282.9	-3.3526	1.665e-55	4.208e-54
PGSC0003DMG400024970	277.562	4614.02	-4.0551	1.8986e-55	4.7942e-54
PGSC0003DMG400025300	8765.37	31194.3	-1.8314	1.9223e-55	4.8453e-54
PGSC0003DMG400012552	559.248	2477.91	-2.1476	1.9501e-55	4.9112e-54
PGSC0003DMG400006796	302.056	2007.97	-2.7328	2.0449e-55	5.1454e-54
Novel02942	3328.98	12322.7	-1.8882	2.6404e-55	6.6147e-54
PGSC0003DMG402015329	6.3351	274.046	-5.4349	2.7212e-55	6.8111e-54
PGSC0003DMG400003182	230.699	2348.99	-3.348	2.873e-55	7.1784e-54
PGSC0003DMG400024180	6287.4	22521.4	-1.8408	6.1462e-55	1.5211e-53
Novel01723	703.001	2976.62	-2.0821	6.9552e-55	1.7183e-53
PGSC0003DMG400010805	2947.93	10749.2	-1.8665	1.0683e-54	2.6233e-53
PGSC0003DMG400026511	1086.07	4305.78	-1.9872	1.1644e-54	2.8521e-53
PGSC0003DMG400001205	2620.58	9650.07	-1.8807	1.1944e-54	2.923e-53
PGSC0003DMG400024925	9324.86	38285.8	-2.0377	1.3752e-54	3.3511e-53
PGSC0003DMG400005910	1305.37	5084.22	-1.9616	1.4401e-54	3.5062e-53
Novel03433	186.135	1095.9	-2.5577	2.2774e-54	5.5166e-53
PGSC0003DMG402025785	150.849	960.319	-2.6704	2.7157e-54	6.5619e-53
Novel00605	292.101	1504.63	-2.3649	2.7557e-54	6.6527e-53
PGSC0003DMG402006288	56.1247	562.559	-3.3253	2.9404e-54	7.0868e-53
PGSC0003DMG400007717	3022.39	10952.2	-1.8575	3.0231e-54	7.2738e-53
PGSC0003DMG400000151	727.215	3043.15	-2.0651	3.2107e-54	7.7187e-53
PGSC0003DMG400007141	3180.4	15975.8	-2.3286	4.1181e-54	9.8833e-53
Novel03593	121.519	846.369	-2.8001	5.52e-54	1.3226e-52
PGSC0003DMG400008701	3743.68	13450	-1.8451	6.3973e-54	1.5315e-52
PGSC0003DMG400018171	32.2708	452.022	-3.8081	8.5709e-54	2.0484e-52
PGSC0003DMG400029334	1331.94	5087.31	-1.9334	1.1077e-53	2.6386e-52
PGSC0003DMG400024399	335.15	2023.97	-2.5943	1.2146e-53	2.8908e-52
PGSC0003DMG400020107	11936.3	48349.7	-2.0181	1.3797e-53	3.281e-52
PGSC0003DMG400011447	1561.54	5881.1	-1.9131	1.8011e-53	4.2689e-52
PGSC0003DMG400032106	1583.88	9190.18	-2.5366	2.3687e-53	5.5957e-52
PGSC0003DMG401032252	822.617	3322.31	-2.0139	2.3876e-53	5.6356e-52
PGSC0003DMG401025689	8.44354	344.565	-5.3508	2.3897e-53	5.6358e-52
PGSC0003DMG400003630	1548.44	6918.81	-2.1597	2.5767e-53	6.072e-52
PGSC0003DMG400025099	352.083	1674.71	-2.2499	3.1601e-53	7.4344e-52
PGSC0003DMG400026513	495.963	2188.95	-2.1419	3.4029e-53	7.9991e-52
PGSC0003DMG402014619	131.017	869.451	-2.7304	3.6707e-53	8.6215e-52
PGSC0003DMG400021442	210.678	1168.01	-2.4709	4.1105e-53	9.6465e-52
PGSC0003DMG400017345	2262.67	8267.12	-1.8694	4.7171e-53	1.1061e-51
Novel01528	221.222	1211.53	-2.4533	7.823e-53	1.8299e-51
PGSC0003DMG400026264	143.382	1614.78	-3.4934	7.8295e-53	1.8299e-51
PGSC0003DMG400024857	1154.46	11569.5	-3.325	8.0643e-53	1.8833e-51
PGSC0003DMG400008939	4560.91	15997.6	-1.8105	8.44e-53	1.9694e-51
Novel00099	169.272	1311.72	-2.954	9.7038e-53	2.2624e-51
PGSC0003DMG400025777	21127	72064.9	-1.7702	1.0423e-52	2.4281e-51
PGSC0003DMG400003245	163.947	986.895	-2.5897	1.6898e-52	3.9237e-51
Novel03132	459.804	2054.85	-2.1599	1.8219e-52	4.2235e-51
PGSC0003DMG401003620	436.1	1968.59	-2.1744	1.8728e-52	4.3381e-51
Novel03129	4658.36	16244.8	-1.8021	3.5286e-52	8.1409e-51
Novel01929	4087.42	14175.4	-1.7941	4.2291e-52	9.7252e-51
PGSC0003DMG400022220	5285.46	18258.3	-1.7885	4.4931e-52	1.0324e-50
PGSC0003DMG400023436	2509.85	8891.76	-1.8249	5.3708e-52	1.2291e-50
PGSC0003DMG400015238	7042.21	41947.5	-2.5745	6.6283e-52	1.5121e-50
Novel02371	1429.06	5300.31	-1.891	6.7206e-52	1.5319e-50
PGSC0003DMG401030736	115.157	798.146	-2.7931	7.1916e-52	1.6367e-50
PGSC0003DMG401013639	901.595	3543.39	-1.9746	8.5307e-52	1.9383e-50
Novel02938	5225.21	17896.9	-1.7761	8.5749e-52	1.9468e-50
PGSC0003DMG400029682	707.827	2883.35	-2.0263	9.6553e-52	2.1904e-50
Novel03220	293.453	3699.72	-3.6562	1.0254e-51	2.3225e-50
Novel03584	1113.5	4289.42	-1.9457	1.2681e-51	2.8677e-50
PGSC0003DMG400018280	471.133	2088.94	-2.1486	1.2896e-51	2.9141e-50
PGSC0003DMG400016518	277.261	1391.79	-2.3276	1.3319e-51	3.0072e-50
PGSC0003DMG400002673	963.081	3708.27	-1.945	1.4289e-51	3.2238e-50
PGSC0003DMG400010100	2151.35	7685.71	-1.8369	1.5764e-51	3.5508e-50
Novel02398	1122	4263.25	-1.9259	1.6074e-51	3.6178e-50
Novel01450	1312.35	4879.29	-1.8945	2.1166e-51	4.7488e-50
PGSC0003DMG400000785	3532.4	14294.9	-2.0168	2.1828e-51	4.8937e-50
Novel03557	1298.54	5096.16	-1.9725	2.2791e-51	5.1054e-50
Novel02051	741.221	2958.77	-1.997	2.4526e-51	5.4855e-50
PGSC0003DMG400031100	5009.14	17161.1	-1.7765	3.8942e-51	8.6557e-50
PGSC0003DMG402026561	586.088	2432.1	-2.053	5.7486e-51	1.2728e-49
Novel00354	14.5996	317.804	-4.4441	6.2462e-51	1.3808e-49
PGSC0003DMG400014537	794.652	3130.02	-1.9778	6.4594e-51	1.4258e-49
Novel02128	2200.63	7776.51	-1.8212	8.4199e-51	1.8542e-49
PGSC0003DMG400025949	583.98	2735.89	-2.228	8.4492e-51	1.8592e-49
PGSC0003DMG400023332	1133.58	4260.76	-1.9102	8.6575e-51	1.9036e-49
PGSC0003DMG400020543	4036.64	13880.9	-1.7819	9.0138e-51	1.9804e-49
PGSC0003DMG400002680	2153.61	7653.47	-1.8294	9.7427e-51	2.1373e-49
PGSC0003DMG400015500	1354.71	5004.63	-1.8853	9.9922e-51	2.1903e-49
PGSC0003DMG400031908	61.6856	559.454	-3.181	1.0459e-50	2.2909e-49
PGSC0003DMG401029805	11.988	297.469	-4.6331	1.0906e-50	2.3852e-49
PGSC0003DMG400019206	812.91	3184.42	-1.9699	1.1005e-50	2.4049e-49
PGSC0003DMG400007330	1366.96	10297.2	-2.9132	1.2581e-50	2.7472e-49
PGSC0003DMG400015258	523.718	2218.63	-2.0828	1.3016e-50	2.84e-49
Novel02179	81.554	639.724	-2.9716	1.3362e-50	2.9133e-49
PGSC0003DMG400027696	1571.93	5775.54	-1.8774	1.5547e-50	3.3845e-49
PGSC0003DMG402019352	277.153	1382.33	-2.3183	1.5608e-50	3.3953e-49
PGSC0003DMG402007274	1583.31	5721.35	-1.8534	1.6472e-50	3.5802e-49
PGSC0003DMG401027685	210.091	1194.87	-2.5078	1.6483e-50	3.5802e-49
PGSC0003DMG400021118	338.33	1577.34	-2.221	2.5498e-50	5.5215e-49
Novel02681	49.4957	502.258	-3.3431	2.6578e-50	5.7466e-49
PGSC0003DMG400019621	683.412	2735.47	-2.001	3.1652e-50	6.8333e-49
PGSC0003DMG402023336	4780.57	17613.3	-1.8814	3.2575e-50	7.022e-49
PGSC0003DMG400021315	14.5602	334.394	-4.5214	3.9517e-50	8.4738e-49
Novel03166	94.4345	690.013	-2.8692	4.1376e-50	8.8658e-49
PGSC0003DMG400002561	13.1799	302.606	-4.521	4.4081e-50	9.4312e-49
PGSC0003DMG400002354	265.342	1318.65	-2.3131	4.5985e-50	9.8312e-49
Novel00892	542.24	2267.97	-2.0644	5.9127e-50	1.2603e-48
Novel03422	185.706	1029.38	-2.4707	6.3215e-50	1.3455e-48
Novel03155	557.692	2310.15	-2.0504	6.3495e-50	1.3504e-48
PGSC0003DMG400028161	488.711	2081.45	-2.0905	6.434e-50	1.3674e-48
PGSC0003DMG400029239	30.517	402.871	-3.7226	6.5425e-50	1.3894e-48
PGSC0003DMG400012727	1217.73	4517.45	-1.8913	7.2142e-50	1.5298e-48
PGSC0003DMG400033662	969.298	3818.64	-1.978	8.5919e-50	1.8152e-48
PGSC0003DMG400004656	136.641	851.997	-2.6405	8.6136e-50	1.8184e-48
PGSC0003DMG400028981	1186.92	4379.12	-1.8834	8.8105e-50	1.8572e-48
PGSC0003DMG400024187	6914.99	23281.3	-1.7514	9.5756e-50	2.0155e-48
Novel01725	46.4065	480.069	-3.3708	1.1121e-49	2.3323e-48
Novel01156	576.814	2362.54	-2.0342	1.2087e-49	2.531e-48
PGSC0003DMG400015463	310.45	3955.96	-3.6716	1.2775e-49	2.6712e-48
PGSC0003DMG400012709	2354.5	8178.67	-1.7964	1.6367e-49	3.4123e-48
PGSC0003DMG400029691	750.863	2926.89	-1.9627	1.7215e-49	3.5865e-48
PGSC0003DMG400013489	193.571	1070.77	-2.4677	1.7505e-49	3.6442e-48
Novel01923	250.349	1257.51	-2.3286	2.0233e-49	4.1999e-48
PGSC0003DMG400004074	1240.02	4522.41	-1.8667	2.438e-49	5.0571e-48
PGSC0003DMG400023883	1044.18	3881.6	-1.8943	2.5253e-49	5.2307e-48
Novel02885	451.935	2135.13	-2.2401	2.597e-49	5.3752e-48
PGSC0003DMG400008076	4772.75	15988.9	-1.7442	4.3261e-49	8.9155e-48
PGSC0003DMG400032818	312.279	1463.49	-2.2285	4.3567e-49	8.9721e-48
PGSC0003DMG400019676	5922.71	19569.4	-1.7243	4.5316e-49	9.3189e-48
Novel00867	4347.63	14552.1	-1.7429	5.556e-49	1.1384e-47
PGSC0003DMG400017730	96.2849	1553.14	-4.0117	8.0606e-49	1.6481e-47
PGSC0003DMG402028907	1527.75	9570.7	-2.6472	8.4198e-49	1.7203e-47
PGSC0003DMG400017696	4061.56	14109.9	-1.7966	9.1091e-49	1.8585e-47
PGSC0003DMG400013632	1448.52	5221.35	-1.8498	9.5629e-49	1.9497e-47
PGSC0003DMG402003169	130.52	813.984	-2.6407	1.0278e-48	2.094e-47
PGSC0003DMG400005628	401.931	3488.47	-3.1176	1.0501e-48	2.1379e-47
Novel02100	556.065	2281.1	-2.0364	1.1032e-48	2.2429e-47
PGSC0003DMG400025646	4190.98	14638.4	-1.8044	1.517e-48	3.0753e-47
PGSC0003DMG400032496	81.8267	620.819	-2.9235	1.6194e-48	3.2782e-47
PGSC0003DMG400029895	11832	38610.7	-1.7063	1.9435e-48	3.9287e-47
PGSC0003DMG400019568	375.205	1714.44	-2.192	2.4371e-48	4.9093e-47
PGSC0003DMG400017156	12158.9	39185	-1.6883	2.5518e-48	5.1366e-47
Novel01976	605.5	2408.5	-1.9919	2.7508e-48	5.5295e-47
PGSC0003DMG400028221	877.255	3298.2	-1.9106	2.8593e-48	5.7435e-47
Novel00335	2862.76	9668.58	-1.7559	3.3291e-48	6.6778e-47
PGSC0003DMG402020301	915.87	3421.81	-1.9015	3.8402e-48	7.6922e-47
Novel03310	22.808	349.35	-3.9371	4.2938e-48	8.5829e-47
PGSC0003DMG400021270	199.848	1054.74	-2.3999	4.8061e-48	9.5934e-47
PGSC0003DMG403016981	511.806	2120.11	-2.0505	5.0739e-48	1.0121e-46
PGSC0003DMG400015341	1075.69	3939.23	-1.8726	5.0875e-48	1.0141e-46
PGSC0003DMG400008222	72.979	964.727	-3.7246	5.4456e-48	1.084e-46
Novel00160	116.549	749.26	-2.6845	5.4728e-48	1.0886e-46
PGSC0003DMG400007507	2592.92	8772.84	-1.7585	5.6855e-48	1.1301e-46
Novel00418	110.126	730.089	-2.7289	6.6208e-48	1.3151e-46
PGSC0003DMG400020424	344.996	1539.8	-2.1581	6.8314e-48	1.356e-46
PGSC0003DMG400001442	2962.17	9970.29	-1.751	7.48e-48	1.4827e-46
PGSC0003DMG400020807	47.2193	471.446	-3.3196	7.763e-48	1.5377e-46
PGSC0003DMG404025785	198.271	2118.31	-3.4174	1.0907e-47	2.1545e-46
PGSC0003DMG401025662	355.504	2452.94	-2.7866	1.3127e-47	2.5878e-46
PGSC0003DMG400024644	10183.7	54228.3	-2.4128	1.4472e-47	2.8489e-46
PGSC0003DMG400014625	1623.49	5613.73	-1.7899	1.6323e-47	3.2068e-46
PGSC0003DMG400020283	3679.99	12096.8	-1.7169	1.8647e-47	3.6557e-46
PGSC0003DMG400005833	4413.61	14468.2	-1.7129	2.3893e-47	4.6714e-46
PGSC0003DMG400019935	183.19	985.39	-2.4274	2.5972e-47	5.0674e-46
PGSC0003DMG400014370	1053.7	3792.88	-1.8478	3.3747e-47	6.5665e-46
PGSC0003DMG400007426	6172.17	20035.1	-1.6987	4.0097e-47	7.7968e-46
PGSC0003DMG400043220	1475.91	5832.64	-1.9825	5.233e-47	1.0148e-45
PGSC0003DMG400018806	2117.15	7134.67	-1.7527	5.4165e-47	1.0497e-45
PGSC0003DMG400025585	4560.4	15910.6	-1.8028	6.2969e-47	1.217e-45
Novel01102	694.295	2650.99	-1.9329	7.1899e-47	1.3886e-45
PGSC0003DMG400016613	4634.61	15063.5	-1.7005	7.322e-47	1.4122e-45
PGSC0003DMG400016517	391.152	1664.7	-2.0895	8.915e-47	1.716e-45
PGSC0003DMG400046448	1102.79	3912.42	-1.8269	9.8135e-47	1.8851e-45
PGSC0003DMG400022488	970.023	8000.17	-3.0439	1.112e-46	2.1347e-45
PGSC0003DMG400022171	4738.38	38339.3	-3.0164	1.1366e-46	2.1804e-45
Novel02494	516.727	2075.08	-2.0057	1.202e-46	2.2996e-45
PGSC0003DMG400009146	995.616	3596	-1.8527	1.2955e-46	2.4769e-45
PGSC0003DMG400023248	240.483	1164.43	-2.2756	1.3152e-46	2.513e-45
PGSC0003DMG400024011	23890.7	75055.7	-1.6515	1.4461e-46	2.7612e-45
Novel01802	1821.09	6185.58	-1.7641	1.4531e-46	2.7728e-45
PGSC0003DMG400029408	34362.1	135179	-1.976	1.4732e-46	2.8092e-45
Novel01069	1117.79	3970.4	-1.8286	1.5493e-46	2.9523e-45
PGSC0003DMG400019254	2294.04	7592.54	-1.7267	1.5885e-46	3.023e-45
PGSC0003DMG400020659	131.375	819.798	-2.6416	1.6759e-46	3.1852e-45
PGSC0003DMG400022144	1718.51	5828.66	-1.762	1.9058e-46	3.6148e-45
Novel00797	2546.24	8484.77	-1.7365	2.0924e-46	3.9608e-45
PGSC0003DMG400016458	445.39	2502.79	-2.4904	2.208e-46	4.1769e-45
PGSC0003DMG402018785	66.3206	542.954	-3.0333	2.4849e-46	4.6944e-45
PGSC0003DMG400014261	2187.74	7277.65	-1.734	2.5542e-46	4.819e-45
PGSC0003DMG402029058	44.8921	449.528	-3.3239	2.6066e-46	4.9146e-45
PGSC0003DMG400022384	311.287	1400.48	-2.1696	2.7328e-46	5.1493e-45
Novel01522	160.952	887.658	-2.4634	2.9006e-46	5.4582e-45
PGSC0003DMG400002786	6102.36	76758.1	-3.6529	2.9698e-46	5.581e-45
Novel00395	258.292	1257.11	-2.283	3.2169e-46	6.0375e-45
PGSC0003DMG400016411	664.226	2766	-2.0581	3.2784e-46	6.149e-45
PGSC0003DMG400015232	347.157	1528.71	-2.1387	3.3818e-46	6.3386e-45
PGSC0003DMG401018576	502.113	2026.49	-2.0129	3.7163e-46	6.9611e-45
PGSC0003DMG400026801	243.204	1262.5	-2.376	3.7298e-46	6.9819e-45
PGSC0003DMG400029727	240.252	1755.04	-2.8689	3.806e-46	7.1199e-45
PGSC0003DMG400027958	25144.1	78838	-1.6487	4.2191e-46	7.8873e-45
Novel02375	1612.36	5937.13	-1.8806	4.4254e-46	8.2676e-45
PGSC0003DMG401023336	4375.94	15365.2	-1.812	4.4966e-46	8.3953e-45
PGSC0003DMG400016374	189.684	992.376	-2.3873	4.5998e-46	8.5768e-45
PGSC0003DMG400030389	6.68407	237.702	-5.1523	4.9919e-46	9.3017e-45
PGSC0003DMG400027831	823.926	3016.86	-1.8725	5.1793e-46	9.6446e-45
PGSC0003DMG400018616	69.17	544.778	-2.9775	5.5646e-46	1.0349e-44
PGSC0003DMG400028363	412.341	2240.84	-2.4421	5.7279e-46	1.0645e-44
PGSC0003DMG401012750	576.995	2260.5	-1.97	5.8322e-46	1.0832e-44
PGSC0003DMG400002727	840.582	3065.19	-1.8665	6.3333e-46	1.1748e-44
PGSC0003DMG402008909	11671.4	49077.4	-2.0721	6.3631e-46	1.1795e-44
Novel01372	2043.5	6835.2	-1.7419	6.5235e-46	1.2085e-44
PGSC0003DMG400005725	122.145	764.789	-2.6465	8.3791e-46	1.5492e-44
Novel03354	101.032	667.324	-2.7236	9.1497e-46	1.6895e-44
Novel02198	2077.04	6899.71	-1.732	1.4248e-45	2.6208e-44
PGSC0003DMG400006615	327.898	1441.37	-2.1361	1.5245e-45	2.8006e-44
Novel00762	671.081	2594.9	-1.9511	1.6024e-45	2.9417e-44
PGSC0003DMG400022170	278.551	1958.86	-2.814	1.6743e-45	3.0717e-44
PGSC0003DMG400029732	393.459	23780.2	-5.9174	2.4911e-45	4.5586e-44
PGSC0003DMG400030083	3394.07	10851.1	-1.6768	2.4927e-45	4.5586e-44
PGSC0003DMG400003218	5044.8	29543.5	-2.55	2.6473e-45	4.8382e-44
PGSC0003DMG400010901	683.075	2551.86	-1.9014	2.9058e-45	5.3006e-44
PGSC0003DMG400030353	1003.95	3554.87	-1.8241	3.2091e-45	5.8501e-44
Novel01342	109.367	694.538	-2.6669	3.2616e-45	5.9344e-44
PGSC0003DMG400000138	2067.14	6808.24	-1.7196	4.2448e-45	7.6988e-44
PGSC0003DMG402016626	858.583	3085.39	-1.8454	6.0479e-45	1.0941e-43
PGSC0003DMG400029006	988.789	3634.37	-1.878	7.4953e-45	1.3526e-43
PGSC0003DMG402003118	2415.84	7899.97	-1.7093	7.8619e-45	1.4169e-43
PGSC0003DMG400023517	1368.16	4667.59	-1.7704	8.1517e-45	1.4682e-43
PGSC0003DMG400005784	6598.09	20551.8	-1.6391	8.8555e-45	1.593e-43
PGSC0003DMG400022809	862.301	3098.22	-1.8452	9.1041e-45	1.6367e-43
PGSC0003DMG401026018	186.246	961.647	-2.3683	9.2049e-45	1.6538e-43
Novel02526	702.877	2606.02	-1.8905	1.0004e-44	1.7951e-43
Novel03405	1439.83	4849.6	-1.752	1.1109e-44	1.9896e-43
PGSC0003DMG402027811	73.1911	557.699	-2.9297	1.5302e-44	2.7302e-43
Novel01151	170.954	909.667	-2.4117	1.5899e-44	2.8351e-43
PGSC0003DMG400002362	1168.45	4010.64	-1.7792	1.6867e-44	3.0057e-43
PGSC0003DMG400019667	199.838	1010.62	-2.3383	1.7684e-44	3.1474e-43
PGSC0003DMG400001427	2342.57	7595.34	-1.697	1.9068e-44	3.3916e-43
Novel01945	114.394	710.802	-2.6354	1.9159e-44	3.4057e-43
Novel03253	238.836	1126.97	-2.2384	1.9425e-44	3.4509e-43
PGSC0003DMG400028855	833.755	4897.96	-2.5545	2.0217e-44	3.5893e-43
Novel00098	121.403	866.363	-2.8352	2.1732e-44	3.856e-43
PGSC0003DMG400002482	5433.72	16980.1	-1.6438	2.6981e-44	4.7813e-43
PGSC0003DMG400016616	70.61	889.098	-3.6544	2.7674e-44	4.8981e-43
PGSC0003DMG400030084	2176.22	7098.43	-1.7057	2.9955e-44	5.2952e-43
PGSC0003DMG400005939	1945.19	7139.1	-1.8758	3.3445e-44	5.9012e-43
PGSC0003DMG400016941	119.594	729.073	-2.6079	3.5173e-44	6.2023e-43
PGSC0003DMG400016539	435.664	1748.82	-2.0051	3.5272e-44	6.2159e-43
PGSC0003DMG400014369	1599.56	6486.66	-2.0198	3.9646e-44	6.9824e-43
PGSC0003DMG400024580	439.406	1758.97	-2.0011	4.5406e-44	7.9821e-43
PGSC0003DMG400025801	1383.02	5453.27	-1.9793	5.4049e-44	9.4839e-43
PGSC0003DMG400005258	7673.62	23712.9	-1.6277	5.4645e-44	9.5826e-43
PGSC0003DMG400026263	517.997	2017.38	-1.9615	5.7294e-44	1.0035e-42
PGSC0003DMG401031202	219.752	1056.89	-2.2659	5.876e-44	1.0285e-42
PGSC0003DMG400011128	203.417	1005.65	-2.3056	6.0994e-44	1.067e-42
PGSC0003DMG400002616	379.163	1574.52	-2.054	6.1151e-44	1.0691e-42
PGSC0003DMG400000678	3150.77	20925.5	-2.7315	6.6378e-44	1.1583e-42
PGSC0003DMG401010374	949.595	3289.49	-1.7925	8.2291e-44	1.4317e-42
PGSC0003DMG400003933	3954.89	12348.5	-1.6426	8.6992e-44	1.5125e-42
PGSC0003DMG401017944	70.2226	534.952	-2.9294	8.7365e-44	1.5173e-42
PGSC0003DMG400025887	757.715	2752.8	-1.8612	8.7371e-44	1.5173e-42
PGSC0003DMG400027327	1121.49	4061.87	-1.8567	8.8052e-44	1.5282e-42
Novel02064	91.4004	823.299	-3.1711	9.7493e-44	1.6889e-42
PGSC0003DMG400033596	211.18	1029.81	-2.2858	9.9177e-44	1.716e-42
PGSC0003DMG400018572	89.747	607.284	-2.7584	1.01e-43	1.7465e-42
PGSC0003DMG401015926	290.205	1638.41	-2.4972	1.0313e-43	1.7823e-42
PGSC0003DMG400001380	220.788	1627.02	-2.8815	1.2415e-43	2.1417e-42
Novel02763	908.767	3161.13	-1.7985	1.2661e-43	2.1828e-42
PGSC0003DMG402014476	12719.9	55482.3	-2.1249	1.5447e-43	2.6582e-42
PGSC0003DMG400000190	2408.65	7658.77	-1.6689	1.5807e-43	2.7186e-42
PGSC0003DMG400006298	471.602	1832.54	-1.9582	1.7611e-43	3.0271e-42
PGSC0003DMG400028589	5846.18	18067	-1.6278	1.8269e-43	3.1364e-42
Novel00993	612.914	2495.98	-2.0258	2.045e-43	3.5045e-42
PGSC0003DMG400006590	5717.45	17601.7	-1.6223	2.1242e-43	3.6379e-42
PGSC0003DMG400014383	2326.92	7462.75	-1.6813	2.2886e-43	3.9126e-42
PGSC0003DMG400006662	4938.45	31232.5	-2.6609	2.4374e-43	4.1644e-42
PGSC0003DMG400026405	1461.84	4824.34	-1.7225	2.4796e-43	4.234e-42
PGSC0003DMG401023760	6270.79	19229.5	-1.6166	2.6548e-43	4.5251e-42
PGSC0003DMG400014711	3383.14	10534.4	-1.6387	3.0563e-43	5.197e-42
PGSC0003DMG400018681	4854.3	14984.7	-1.6262	3.0707e-43	5.2184e-42
PGSC0003DMG400010424	813.118	4567.59	-2.4899	3.1825e-43	5.3956e-42
PGSC0003DMG400009349	423.6	1686.1	-1.9929	3.2565e-43	5.5145e-42
PGSC0003DMG400003102	1216.13	5048.64	-2.0536	3.3871e-43	5.7287e-42
PGSC0003DMG400030023	670.925	2446.72	-1.8666	3.4757e-43	5.8717e-42
PGSC0003DMG400021002	4578.77	14227.7	-1.6357	3.7319e-43	6.2971e-42
Novel01332	2049	6560.1	-1.6788	4.0411e-43	6.8108e-42
PGSC0003DMG400004915	1210.86	4048.68	-1.7414	4.4611e-43	7.5097e-42
PGSC0003DMG400005140	7836.09	24479	-1.6433	5.0515e-43	8.4886e-42
Novel01434	10036.6	30446.9	-1.601	5.3929e-43	9.0571e-42
PGSC0003DMG400001688	202.387	992.036	-2.2933	6.0194e-43	1.0068e-41
PGSC0003DMG400028278	77.9565	833.095	-3.4177	6.0316e-43	1.0082e-41
PGSC0003DMG400016548	143.171	923.203	-2.6889	6.7965e-43	1.1348e-41
PGSC0003DMG400011753	12433.8	46716.1	-1.9097	6.8603e-43	1.1447e-41
PGSC0003DMG400005346	583.392	2161.38	-1.8894	7.3715e-43	1.2286e-41
PGSC0003DMG400008941	63.9344	691.29	-3.4346	7.4394e-43	1.2392e-41
Novel01346	54.8851	465.446	-3.0841	7.9226e-43	1.3182e-41
PGSC0003DMG400004162	242.147	1121.11	-2.211	8.4789e-43	1.4091e-41
PGSC0003DMG400017655	15.1609	275.894	-4.1857	8.6269e-43	1.4328e-41
Novel01375	372.225	1518.05	-2.028	9.2743e-43	1.5386e-41
PGSC0003DMG400032183	114.535	687.625	-2.5858	9.3997e-43	1.5585e-41
Novel01424	1105.05	3751.77	-1.7635	9.4482e-43	1.5656e-41
PGSC0003DMG400023920	143.82	785.581	-2.4495	1.0471e-42	1.7281e-41
PGSC0003DMG400025431	112.266	680.701	-2.6001	1.0658e-42	1.7578e-41
Novel02755	784.546	3112.18	-1.988	1.2296e-42	2.0246e-41
PGSC0003DMG400009579	275.967	1213.12	-2.1362	1.3684e-42	2.2493e-41
PGSC0003DMG400024609	226.719	1059.73	-2.2247	1.6966e-42	2.7822e-41
PGSC0003DMG400010630	314.563	1339.95	-2.0908	1.7449e-42	2.8599e-41
PGSC0003DMG400035518	28.347	343.253	-3.598	1.9152e-42	3.1353e-41
PGSC0003DMG400015246	565.402	2589.55	-2.1953	1.9654e-42	3.212e-41
PGSC0003DMG400013664	3139.52	9784.38	-1.6399	1.9877e-42	3.2466e-41
PGSC0003DMG400025880	11415.4	33964.2	-1.573	2.1359e-42	3.4847e-41
PGSC0003DMG400030471	8522.31	25651.8	-1.5897	2.1574e-42	3.5178e-41
PGSC0003DMG401012560	3256.94	10022.6	-1.6217	2.2177e-42	3.614e-41
Novel01457	1284.04	4260.13	-1.7302	2.2739e-42	3.7036e-41
PGSC0003DMG400031113	1439.65	4690.68	-1.7041	2.3113e-42	3.7623e-41
PGSC0003DMG400016968	349.861	1442.46	-2.0437	2.5072e-42	4.0743e-41
PGSC0003DMG400000706	730.551	9445.98	-3.6926	2.6971e-42	4.3778e-41
PGSC0003DMG400015966	289.698	1251.43	-2.111	2.8214e-42	4.5718e-41
Novel02439	19.5056	297.718	-3.932	3.1396e-42	5.0817e-41
PGSC0003DMG400025399	324.308	1364.85	-2.0733	3.325e-42	5.3757e-41
PGSC0003DMG400009432	5858.04	17585.5	-1.5859	3.8951e-42	6.2797e-41
PGSC0003DMG400027425	116.234	824.801	-2.827	3.9467e-42	6.3592e-41
PGSC0003DMG400024716	14656.8	43235.2	-1.5606	3.9938e-42	6.4278e-41
PGSC0003DMG400030643	752.033	2638	-1.8106	4.4275e-42	7.1218e-41
Novel00730	124.789	716.319	-2.5211	4.4603e-42	7.1706e-41
Novel01999	884.846	3027.22	-1.7745	4.699e-42	7.5417e-41
PGSC0003DMG400012771	7430.82	22144.8	-1.5754	4.9082e-42	7.873e-41
PGSC0003DMG400019742	1052.76	3544.73	-1.7515	5.3883e-42	8.6237e-41
PGSC0003DMG400010186	24.6429	352.813	-3.8397	6.2075e-42	9.9292e-41
PGSC0003DMG400033034	15381.9	45972.8	-1.5795	6.3468e-42	1.0141e-40
Novel03627	1017.79	3850.49	-1.9196	7.2622e-42	1.1577e-40
Novel02459	4875.35	42692.6	-3.1304	7.534e-42	1.1997e-40
PGSC0003DMG400032243	399.491	3422.56	-3.0988	7.7096e-42	1.227e-40
Novel00537	150.235	1996.7	-3.7323	8.8305e-42	1.4031e-40
PGSC0003DMG401001720	381.793	1529.72	-2.0024	9.4008e-42	1.492e-40
PGSC0003DMG400008736	293.125	1254.87	-2.098	1.4074e-41	2.2263e-40
PGSC0003DMG400031139	1010.42	9493.81	-3.232	1.4706e-41	2.3232e-40
PGSC0003DMG400010891	1076.13	3581.64	-1.7348	1.4776e-41	2.3309e-40
PGSC0003DMG400028845	3043.55	9419.44	-1.6299	1.6063e-41	2.5311e-40
Novel01810	14.3827	523.005	-5.1844	1.6769e-41	2.641e-40
PGSC0003DMG402005959	6010.42	17951.9	-1.5786	1.8888e-41	2.9698e-40
PGSC0003DMG400017095	676.509	2531.29	-1.9037	2.0979e-41	3.2948e-40
PGSC0003DMG400008193	6116.05	18377.6	-1.5873	2.3887e-41	3.7433e-40
PGSC0003DMG400020172	542.863	1997.12	-1.8793	2.6249e-41	4.1113e-40
PGSC0003DMG400007193	2361.55	7273.57	-1.6229	3.267e-41	5.0946e-40
PGSC0003DMG400007207	1166.92	4515.1	-1.952	3.3504e-41	5.219e-40
PGSC0003DMG400020352	533.111	1959.97	-1.8783	3.3605e-41	5.2319e-40
PGSC0003DMG400011851	105.812	641.413	-2.5997	3.5155e-41	5.4701e-40
PGSC0003DMG400026248	745.344	2599.26	-1.8021	3.8312e-41	5.955e-40
PGSC0003DMG400012703	1051.63	3470.08	-1.7223	3.8721e-41	6.0152e-40
Novel03602	1777.92	5589.53	-1.6525	3.9143e-41	6.0741e-40
Novel00899	1005.74	5631.32	-2.4852	4.427e-41	6.866e-40
PGSC0003DMG400001480	1.80163	166.755	-6.5323	4.6518e-41	7.2029e-40
PGSC0003DMG400017930	559.205	2031.44	-1.8611	5.0064e-41	7.7478e-40
Novel00564	1891.4	10372.4	-2.4552	5.3676e-41	8.2933e-40
PGSC0003DMG400009547	81.5882	546.073	-2.7427	5.5575e-41	8.5821e-40
PGSC0003DMG401007888	595.349	2146.09	-1.8499	5.8114e-41	8.9646e-40
Novel01130	2927.69	10024.7	-1.7757	6.4372e-41	9.9192e-40
Novel01859	44.8797	484.653	-3.4328	6.542e-41	1.0075e-39
PGSC0003DMG400031271	737.825	2569.75	-1.8003	6.8448e-41	1.053e-39
PGSC0003DMG400000234	604.619	2906.97	-2.2654	7.1918e-41	1.1058e-39
Novel02166	3209.29	9733.51	-1.6007	8.3065e-41	1.2738e-39
PGSC0003DMG401005575	869.976	2942.22	-1.7579	8.9407e-41	1.3703e-39
Novel03184	399.327	1564.13	-1.9697	9.0113e-41	1.3804e-39
PGSC0003DMG400026700	593.719	2128.54	-1.842	9.1818e-41	1.4057e-39
PGSC0003DMG400008719	696.308	2429.33	-1.8028	9.9347e-41	1.5202e-39
Novel01624	87.2148	562.08	-2.6881	1.0246e-40	1.5669e-39
PGSC0003DMG400028488	36.3885	367.781	-3.3373	1.1644e-40	1.7798e-39
Novel00327	3170.78	9600.85	-1.5983	1.2077e-40	1.844e-39
PGSC0003DMG400002724	798.238	2738.26	-1.7784	1.2699e-40	1.9339e-39
PGSC0003DMG402029202	1319.14	4229.46	-1.6809	1.2714e-40	1.9351e-39
PGSC0003DMG400029338	639.219	5358.8	-3.0675	1.2836e-40	1.9527e-39
Novel00982	7219.27	20991.9	-1.5399	1.6166e-40	2.4579e-39
Novel01401	1875.96	5861.02	-1.6435	1.6815e-40	2.5538e-39
PGSC0003DMG400007232	236.993	1055.32	-2.1548	1.8264e-40	2.7725e-39
Novel02135	810.165	2753.36	-1.7649	1.8795e-40	2.85e-39
PGSC0003DMG400001544	177.173	1388.51	-2.9703	1.8909e-40	2.8659e-39
PGSC0003DMG400019286	3224.53	9708.96	-1.5902	2.0671e-40	3.1263e-39
PGSC0003DMG400002228	114.131	653.436	-2.5174	2.4867e-40	3.7489e-39
Novel01183	5940.4	17373	-1.5482	2.564e-40	3.8634e-39
PGSC0003DMG400010268	11.0475	319.601	-4.8545	2.7576e-40	4.1529e-39
Novel02063	171.386	840.209	-2.2935	3.0594e-40	4.6026e-39
Novel03523	191.329	1316.2	-2.7823	3.0623e-40	4.6046e-39
PGSC0003DMG400013858	2046.97	6295.37	-1.6208	3.1987e-40	4.8071e-39
PGSC0003DMG400028147	53.8182	441.399	-3.0359	3.8648e-40	5.7929e-39
PGSC0003DMG400005252	4949.45	14500.5	-1.5508	4.2578e-40	6.3686e-39
PGSC0003DMG401028577	649.798	2274.31	-1.8074	4.3209e-40	6.4596e-39
PGSC0003DMG400004585	1783.68	5500.78	-1.6248	4.3519e-40	6.5026e-39
Novel01968	4024.76	11911.3	-1.5654	5.2657e-40	7.8638e-39
PGSC0003DMG400018659	1701.38	7894.55	-2.2141	5.5252e-40	8.2471e-39
PGSC0003DMG400002928	1416.78	4989.06	-1.8162	5.5287e-40	8.2481e-39
Novel02151	346.278	1389.77	-2.0048	5.9245e-40	8.8339e-39
PGSC0003DMG400014906	69.7591	494.204	-2.8247	6.0802e-40	9.0613e-39
PGSC0003DMG400013721	263.99	1128.64	-2.096	6.1152e-40	9.1088e-39
PGSC0003DMG400022853	161.679	815.542	-2.3346	6.2935e-40	9.3695e-39
PGSC0003DMG400007542	239.933	1048.07	-2.127	6.6022e-40	9.8188e-39
Novel03081	362.848	1443.1	-1.9917	8.7651e-40	1.2975e-38
PGSC0003DMG400007466	7239.92	21026.3	-1.5382	9.0483e-40	1.3373e-38
PGSC0003DMG400011237	4172.32	12264.3	-1.5555	9.5746e-40	1.4129e-38
PGSC0003DMG400010676	6506.31	23854.8	-1.8744	1.0434e-39	1.5382e-38
Novel01838	218.15	981.267	-2.1693	1.0737e-39	1.5819e-38
PGSC0003DMG400012665	35.9655	981.192	-4.7698	1.1326e-39	1.667e-38
PGSC0003DMG400015243	1269.56	4010.4	-1.6594	1.1736e-39	1.7257e-38
PGSC0003DMG400025334	238.723	1039.72	-2.1228	1.456e-39	2.1342e-38
PGSC0003DMG400023771	1555.91	4848.73	-1.6398	1.5424e-39	2.2597e-38
PGSC0003DMG402015876	378.941	1459.87	-1.9458	1.755e-39	2.5659e-38
Novel01474	153.87	772.99	-2.3287	1.826e-39	2.6684e-38
PGSC0003DMG400030794	158.824	798.956	-2.3307	1.8336e-39	2.6781e-38
Novel00965	3498.05	10553.9	-1.5931	2.0832e-39	3.0396e-38
PGSC0003DMG400014258	188.785	884.489	-2.2281	2.7565e-39	4.0078e-38
PGSC0003DMG400025992	71.207	498.186	-2.8066	2.7714e-39	4.0273e-38
PGSC0003DMG402014048	68.9149	491.138	-2.8332	2.9359e-39	4.262e-38
PGSC0003DMG400018847	1175.31	3739.62	-1.6698	2.9734e-39	4.3144e-38
PGSC0003DMG400008119	46470.5	131048	-1.4957	3.467e-39	5.028e-38
PGSC0003DMG400020064	1859.89	5701.29	-1.6161	3.5249e-39	5.1093e-38
PGSC0003DMG400008462	1218.08	3845.5	-1.6586	3.6381e-39	5.2681e-38
PGSC0003DMG400021341	252.331	1144.41	-2.1812	4.5612e-39	6.5948e-38
PGSC0003DMG400026239	2306.43	6923.07	-1.5857	4.6128e-39	6.666e-38
PGSC0003DMG400027577	1261.08	4287.02	-1.7653	4.7702e-39	6.8899e-38
PGSC0003DMG400020205	16.752	263.139	-3.9734	4.8946e-39	7.066e-38
PGSC0003DMG400000930	894.987	2935.91	-1.7139	5.1999e-39	7.503e-38
PGSC0003DMG400004343	2.08307	160.954	-6.2718	5.6438e-39	8.1352e-38
PGSC0003DMG401029995	20.2282	284.293	-3.8129	6.1284e-39	8.8204e-38
PGSC0003DMG400014893	12556.1	35584.9	-1.5029	6.3253e-39	9.0928e-38
PGSC0003DMG400011197	276.228	9865.54	-5.1585	6.7532e-39	9.7001e-38
PGSC0003DMG402015240	682.274	2320.8	-1.7662	6.8628e-39	9.8477e-38
PGSC0003DMG403016183	1379.88	4281.28	-1.6335	7.7532e-39	1.1109e-37
PGSC0003DMG400001884	135.797	705.033	-2.3762	8.2255e-39	1.1768e-37
PGSC0003DMG400022262	268.533	2196.1	-3.0318	8.7898e-39	1.2569e-37
PGSC0003DMG400028233	1566.32	4845.42	-1.6292	1.036e-38	1.4785e-37
Novel02925	1775.99	7521.13	-2.0823	1.0432e-38	1.4879e-37
PGSC0003DMG400016242	855.614	2828.09	-1.7248	1.0875e-38	1.5496e-37
Novel00980	1073.25	3415.62	-1.6702	1.1502e-38	1.6381e-37
PGSC0003DMG400000978	2112.53	8375.59	-1.9872	1.1915e-38	1.6962e-37
PGSC0003DMG400003590	5249.93	18988.8	-1.8548	1.2996e-38	1.8472e-37
PGSC0003DMG400024713	1314.63	4092.02	-1.6382	1.393e-38	1.9781e-37
PGSC0003DMG400030733	7150.27	20471.9	-1.5176	1.4056e-38	1.9949e-37
PGSC0003DMG400003312	545.371	1919.33	-1.8153	1.5287e-38	2.1675e-37
PGSC0003DMG400029751	1940.27	5892.25	-1.6026	1.5553e-38	2.2041e-37
Novel01110	1003.63	3226.52	-1.6848	1.6706e-38	2.3593e-37
PGSC0003DMG400024502	395.525	2844.81	-2.8465	2.026e-38	2.8514e-37
PGSC0003DMG400025784	311.451	1246.96	-2.0013	2.0635e-38	2.9027e-37
PGSC0003DMG400011631	76.8685	522.16	-2.764	2.0685e-38	2.9083e-37
PGSC0003DMG400021656	680.081	2306.49	-1.7619	2.086e-38	2.93e-37
PGSC0003DMG400000885	527.319	2365.29	-2.1653	2.1721e-38	3.0495e-37
PGSC0003DMG400003653	573.05	2010.19	-1.8106	2.2526e-38	3.1609e-37
PGSC0003DMG400022290	647.687	2704.15	-2.0618	2.3866e-38	3.3473e-37
Novel03023	154.706	765.489	-2.3069	2.4503e-38	3.435e-37
PGSC0003DMG400030339	1083.06	3667.58	-1.7597	2.7485e-38	3.8499e-37
PGSC0003DMG400012452	9365.06	26482.3	-1.4997	2.7489e-38	3.8499e-37
PGSC0003DMG400011361	928.511	2988.28	-1.6863	2.86e-38	3.9975e-37
PGSC0003DMG400026524	4395.4	18828.1	-2.0988	2.932e-38	4.0962e-37
PGSC0003DMG400026120	672.442	2262.74	-1.7506	3.0633e-38	4.2775e-37
PGSC0003DMG400029571	1135.41	3566.53	-1.6513	3.1097e-38	4.3359e-37
PGSC0003DMG400014900	271.545	1123.22	-2.0484	3.2351e-38	4.5042e-37
PGSC0003DMG400033586	666.787	2290.56	-1.7804	3.2861e-38	4.573e-37
Novel03327	1125.91	3540.49	-1.6529	3.3119e-38	4.6066e-37
PGSC0003DMG402010367	511.812	1805.5	-1.8187	3.6003e-38	5.003e-37
Novel00971	51.2697	557.846	-3.4437	3.7535e-38	5.2108e-37
PGSC0003DMG403025764	380.68	1429.58	-1.9089	3.7664e-38	5.2261e-37
Novel02227	2649.52	7763.34	-1.5509	3.8584e-38	5.346e-37
PGSC0003DMG400021637	429.982	1582.32	-1.8797	4.2384e-38	5.8556e-37
Novel00159	49.1675	586.37	-3.576	4.6024e-38	6.3553e-37
PGSC0003DMG400005636	844.983	3478.72	-2.0416	4.6519e-38	6.4206e-37
PGSC0003DMG400007128	5597.86	17021.9	-1.6044	4.6683e-38	6.4401e-37
PGSC0003DMG400009019	8671.43	24477.1	-1.4971	4.8225e-38	6.6464e-37
PGSC0003DMG400018122	13843.6	38538.7	-1.4771	5.6596e-38	7.7813e-37
PGSC0003DMG400015112	593.748	2026.42	-1.771	5.9352e-38	8.1563e-37
PGSC0003DMG400002770	2817.62	11448.6	-2.0226	5.9698e-38	8.196e-37
PGSC0003DMG400007806	503.218	2195.73	-2.1254	6.6622e-38	9.1379e-37
PGSC0003DMG400021428	2357.94	6967.1	-1.563	6.9341e-38	9.5016e-37
PGSC0003DMG400014907	738	3434.89	-2.2186	7.0958e-38	9.7139e-37
PGSC0003DMG400012412	4197.59	12066.5	-1.5234	7.3754e-38	1.0087e-36
PGSC0003DMG400004621	354.729	1354.1	-1.9325	7.7009e-38	1.0517e-36
PGSC0003DMG400008384	909.275	2920.86	-1.6836	7.8297e-38	1.0688e-36
PGSC0003DMG402020715	1077.52	3392.65	-1.6547	8.7949e-38	1.1988e-36
PGSC0003DMG400020660	721.911	2391.49	-1.728	8.9914e-38	1.2244e-36
PGSC0003DMG400027187	336.115	1294.33	-1.9452	9.9885e-38	1.3583e-36
PGSC0003DMG400022675	5892.6	16650.7	-1.4986	1.0881e-37	1.4776e-36
Novel03261	1680.79	5101.73	-1.6018	1.1395e-37	1.5451e-36
PGSC0003DMG400024490	1864.64	5571.14	-1.5791	1.1617e-37	1.5745e-36
PGSC0003DMG400001150	443.015	1609.15	-1.8609	1.1805e-37	1.5985e-36
PGSC0003DMG400005912	1430.14	4328.37	-1.5977	1.2863e-37	1.7401e-36
PGSC0003DMG400019438	715.014	2362.11	-1.724	1.3559e-37	1.8307e-36
PGSC0003DMG400006797	523.811	2470.75	-2.2378	1.4894e-37	2.0101e-36
Novel02341	1021.17	3228.88	-1.6608	1.5448e-37	2.0838e-36
Novel02041	5302.01	15000.3	-1.5004	1.6179e-37	2.1803e-36
PGSC0003DMG400007340	3.26611	168.82	-5.6918	1.8862e-37	2.5336e-36
PGSC0003DMG400019831	240.296	1016.14	-2.0802	2.0841e-37	2.7982e-36
Novel02814	3454.69	9913.28	-1.5208	2.1778e-37	2.9225e-36
Novel00103	382.749	1469.07	-1.9404	2.6608e-37	3.5674e-36
PGSC0003DMG400020451	52.8602	407.597	-2.9469	2.9292e-37	3.9254e-36
PGSC0003DMG400013212	116.683	627.997	-2.4282	3.2358e-37	4.3322e-36
PGSC0003DMG400009556	3980.51	11274.9	-1.5021	3.5689e-37	4.7729e-36
PGSC0003DMG400024552	361.106	1353.28	-1.906	3.57e-37	4.7729e-36
PGSC0003DMG400003026	201.978	887.283	-2.1352	3.5929e-37	4.8013e-36
PGSC0003DMG402008726	28.1796	308.89	-3.4544	3.6018e-37	4.811e-36
PGSC0003DMG401006284	2411.55	7031.94	-1.544	3.7766e-37	5.0396e-36
PGSC0003DMG400012847	226.213	967.8	-2.097	3.8736e-37	5.1667e-36
PGSC0003DMG400010368	481.408	1693.72	-1.8149	4.7974e-37	6.3781e-36
Novel02044	541.714	1855.96	-1.7766	4.929e-37	6.55e-36
PGSC0003DMG400025527	6901.99	19412.1	-1.4919	5.2741e-37	7.0021e-36
PGSC0003DMG400007862	402.091	1471.07	-1.8713	5.4252e-37	7.1994e-36
Novel01464	237.381	1227.04	-2.3699	5.6337e-37	7.4725e-36
Novel02016	1309.61	4001.32	-1.6113	5.883e-37	7.7996e-36
PGSC0003DMG402025809	89.336	542.656	-2.6027	5.9999e-37	7.9509e-36
PGSC0003DMG400016485	10686.5	29471	-1.4635	7.068e-37	9.3403e-36
PGSC0003DMG400001749	31.6915	584.799	-4.2058	7.2221e-37	9.5395e-36
PGSC0003DMG400007831	10063.2	27944.5	-1.4735	7.2848e-37	9.6179e-36
Novel01119	84.797	520.712	-2.6184	7.839e-37	1.034e-35
PGSC0003DMG400002900	1493.22	6161.54	-2.0449	7.8786e-37	1.0388e-35
Novel00544	1687.57	4986.97	-1.5632	7.9234e-37	1.0442e-35
PGSC0003DMG400018702	225.097	993.654	-2.1422	8.002e-37	1.054e-35
PGSC0003DMG400024558	3839.82	25456.6	-2.7289	8.1465e-37	1.0721e-35
PGSC0003DMG400009398	2239.61	6548.73	-1.548	8.3366e-37	1.0966e-35
PGSC0003DMG400029760	26228.2	72198.5	-1.4608	8.9073e-37	1.1706e-35
PGSC0003DMG400008805	30.7675	317.334	-3.3665	8.96e-37	1.1765e-35
PGSC0003DMG400001330	496.082	1765.78	-1.8317	9.19e-37	1.2061e-35
PGSC0003DMG400022237	831.203	3156.41	-1.925	9.3362e-37	1.2247e-35
PGSC0003DMG400008128	11.9338	225.602	-4.2406	9.7445e-37	1.2759e-35
PGSC0003DMG402019696	85.7852	563.255	-2.715	1.0063e-36	1.317e-35
Novel01794	1932.74	5649.53	-1.5475	1.0245e-36	1.3397e-35
PGSC0003DMG400020775	38942.7	106480	-1.4512	1.0686e-36	1.3954e-35
PGSC0003DMG400019635	2460.12	7149.66	-1.5391	1.0894e-36	1.4218e-35
PGSC0003DMG400000979	354.079	1591.07	-2.1679	1.1738e-36	1.5293e-35
PGSC0003DMG400024167	1544.58	4623.81	-1.5819	1.3625e-36	1.7735e-35
PGSC0003DMG400030726	920.158	3148.51	-1.7747	1.3647e-36	1.7755e-35
PGSC0003DMG400013523	7342.62	20607.3	-1.4888	1.3694e-36	1.7809e-35
PGSC0003DMG400028128	2244.63	6527.43	-1.54	1.5235e-36	1.9795e-35
PGSC0003DMG400026613	255.17	1036.04	-2.0215	1.5406e-36	2.0007e-35
PGSC0003DMG400013429	751.195	2435.98	-1.6972	1.6146e-36	2.093e-35
Novel00303	864.608	2808.52	-1.6997	1.6348e-36	2.1183e-35
PGSC0003DMG400014443	625.268	2080.18	-1.7342	1.6791e-36	2.1747e-35
PGSC0003DMG400032215	178.418	813.202	-2.1884	1.7724e-36	2.2945e-35
PGSC0003DMG400004937	4508.83	12660.3	-1.4895	1.8255e-36	2.3611e-35
PGSC0003DMG400011630	92.2061	544.239	-2.5613	1.8842e-36	2.4359e-35
Novel02426	846.289	2696.77	-1.672	2.0039e-36	2.5883e-35
PGSC0003DMG400031151	1021.41	3174.9	-1.6362	2.1243e-36	2.7425e-35
PGSC0003DMG400002481	1026.73	3160.62	-1.6222	2.6044e-36	3.3534e-35
PGSC0003DMG400029872	899.048	4694.21	-2.3844	2.6277e-36	3.3806e-35
PGSC0003DMG400024468	828.679	2614.56	-1.6577	2.6521e-36	3.4087e-35
PGSC0003DMG402008399	92.9076	539.298	-2.5372	2.7365e-36	3.514e-35
Novel03032	1239.53	3815.62	-1.6221	3.2884e-36	4.2094e-35
Novel00943	1849.99	5411.47	-1.5485	3.2977e-36	4.2194e-35
PGSC0003DMG402022579	875.534	2742.11	-1.647	3.3417e-36	4.2739e-35
PGSC0003DMG400027764	218.821	937.647	-2.0993	3.4511e-36	4.4118e-35
Novel03447	311.07	1358.66	-2.1269	3.5274e-36	4.5052e-35
Novel00771	82.5047	506.185	-2.6171	3.7841e-36	4.8309e-35
Novel03025	2065.68	5970.22	-1.5312	3.9264e-36	5.0104e-35
PGSC0003DMG400007124	37.4381	339.567	-3.1811	4.2256e-36	5.3874e-35
PGSC0003DMG400001927	3170.05	8950.13	-1.4974	4.4424e-36	5.6613e-35
PGSC0003DMG400010028	71.2598	465.324	-2.7071	4.6439e-36	5.9154e-35
PGSC0003DMG400024382	137.689	1170.35	-3.0875	5.1586e-36	6.5622e-35
PGSC0003DMG402002797	451.491	1674.38	-1.8909	5.8167e-36	7.3863e-35
PGSC0003DMG400021668	911.382	2850.64	-1.6452	6.0648e-36	7.6978e-35
PGSC0003DMG400006794	281.82	1116.78	-1.9865	6.3031e-36	7.9968e-35
PGSC0003DMG400004781	5554.08	15279.2	-1.46	6.3672e-36	8.0746e-35
PGSC0003DMG400017196	6404.26	17575.3	-1.4564	6.6052e-36	8.3726e-35
PGSC0003DMG400017635	2987.37	8462.11	-1.5021	6.668e-36	8.4485e-35
PGSC0003DMG402029795	288.856	1122.36	-1.9581	7.0213e-36	8.8922e-35
PGSC0003DMG400010099	28.4043	301.437	-3.4077	7.0628e-36	8.9408e-35
PGSC0003DMG400005011	3335.52	9371.66	-1.4904	7.5591e-36	9.5648e-35
PGSC0003DMG400023730	339.242	1262.85	-1.8963	7.7382e-36	9.7828e-35
PGSC0003DMG400020638	128.338	653.781	-2.3489	8.6011e-36	1.0864e-34
PGSC0003DMG400000558	2338.39	6641.09	-1.5059	8.6975e-36	1.0981e-34
PGSC0003DMG400009571	595.325	1982.14	-1.7353	8.7276e-36	1.1014e-34
PGSC0003DMG400008114	4018.87	11158.4	-1.4733	8.8336e-36	1.1143e-34
PGSC0003DMG400030357	570.373	6293.45	-3.4639	8.9962e-36	1.1343e-34
Novel01120	1448.99	6264.64	-2.1122	9.8253e-36	1.2372e-34
PGSC0003DMG400009175	11.1181	218.057	-4.2937	1.0728e-35	1.3503e-34
Novel00169	311.878	1179.87	-1.9196	1.148e-35	1.443e-34
Novel00347	1756.19	5078.67	-1.532	1.1637e-35	1.4609e-34
PGSC0003DMG400007808	389.486	1396.41	-1.8421	1.1833e-35	1.4841e-34
PGSC0003DMG400001432	2685.5	7551.65	-1.4916	1.1842e-35	1.4847e-34
PGSC0003DMG402009228	11.2899	213.389	-4.2404	1.3862e-35	1.7364e-34
Novel02782	1763.92	8933.56	-2.3404	1.5787e-35	1.9757e-34
Novel01602	52.6654	399.048	-2.9216	1.6074e-35	2.0107e-34
Novel00179	36.4626	334.481	-3.1974	1.6233e-35	2.0289e-34
PGSC0003DMG400012664	279.677	1335.82	-2.2559	1.6326e-35	2.0396e-34
PGSC0003DMG400029731	1473.32	4337.28	-1.5577	1.718e-35	2.1435e-34
PGSC0003DMG402016414	561.88	1866.69	-1.7321	1.7475e-35	2.1784e-34
Novel01831	243.28	986.592	-2.0198	1.768e-35	2.202e-34
PGSC0003DMG400022499	3753.12	10433.2	-1.475	1.9003e-35	2.3637e-34
Novel01728	742.48	2372.07	-1.6757	1.9125e-35	2.3779e-34
PGSC0003DMG400018108	1285.71	3808.85	-1.5668	1.9287e-35	2.3959e-34
PGSC0003DMG400029926	1900.18	5470.03	-1.5254	2.0305e-35	2.5213e-34
PGSC0003DMG400024642	378.148	1714.2	-2.1805	2.1682e-35	2.69e-34
PGSC0003DMG401000594	191.336	2127.82	-3.4752	2.2086e-35	2.7388e-34
Novel00285	485.068	1673.92	-1.787	2.3428e-35	2.904e-34
Novel00893	182.935	803.809	-2.1355	2.3718e-35	2.9387e-34
PGSC0003DMG400004735	52.379	391.157	-2.9007	2.6944e-35	3.3355e-34
PGSC0003DMG400005408	344.607	2752.2	-2.9976	2.7732e-35	3.4316e-34
PGSC0003DMG400016033	7.53479	189.059	-4.6491	3.2468e-35	4.0124e-34
PGSC0003DMG400029705	10.2254	585.713	-5.84	3.8522e-35	4.7502e-34
PGSC0003DMG400000489	1111.74	3335.62	-1.5851	3.8773e-35	4.7771e-34
PGSC0003DMG400032173	201.359	863.495	-2.1004	4.1575e-35	5.1201e-34
PGSC0003DMG400013216	139.662	675.415	-2.2738	4.4486e-35	5.4716e-34
PGSC0003DMG400023499	1757.59	5033.1	-1.5178	4.6379e-35	5.697e-34
Novel00097	2110.46	7268.74	-1.7841	4.9953e-35	6.1281e-34
Novel01832	40.4028	344.541	-3.0921	5.007e-35	6.1399e-34
Novel00599	3507.6	9696.69	-1.467	5.4984e-35	6.7338e-34
PGSC0003DMG400005081	13139.4	35257.4	-1.424	5.5664e-35	6.8112e-34
PGSC0003DMG400006170	1284.48	3770.48	-1.5536	5.6281e-35	6.8808e-34
PGSC0003DMG403025742	675.301	2155.38	-1.6743	6.0142e-35	7.3466e-34
PGSC0003DMG400015408	1236.6	5766.1	-2.2212	6.4879e-35	7.9218e-34
Novel03575	244.866	992.12	-2.0185	6.7321e-35	8.2129e-34
PGSC0003DMG400005943	560.608	2845.68	-2.3437	7.3628e-35	8.9748e-34
PGSC0003DMG401024988	1736.79	5023.15	-1.5322	8.2094e-35	9.9982e-34
PGSC0003DMG403024894	37.6139	352.373	-3.2278	8.2702e-35	1.0068e-33
PGSC0003DMG401031520	443.927	3282.87	-2.8866	8.9387e-35	1.0868e-33
Novel01013	204.763	868.831	-2.0851	9.7669e-35	1.186e-33
PGSC0003DMG400022682	28.5754	315.759	-3.466	1.0046e-34	1.2188e-33
PGSC0003DMG400005760	65.669	732.391	-3.4793	1.0073e-34	1.2216e-33
PGSC0003DMG401010056	116.858	883.869	-2.9191	1.0227e-34	1.2397e-33
Novel02013	1163.65	3454.68	-1.5699	1.0333e-34	1.252e-33
PGSC0003DMG400000572	6870.23	27503.9	-2.0012	1.0654e-34	1.2892e-33
PGSC0003DMG400022159	44428.3	410627	-3.2083	1.0805e-34	1.3071e-33
PGSC0003DMG400002513	810.955	2518.26	-1.6347	1.1063e-34	1.3377e-33
PGSC0003DMG400025629	467.423	1591.79	-1.7679	1.3155e-34	1.5886e-33
PGSC0003DMG400026779	59.1099	421.598	-2.8344	1.4615e-34	1.7626e-33
PGSC0003DMG400006959	989.41	3223.08	-1.7038	1.5512e-34	1.87e-33
PGSC0003DMG400000542	365.817	1304.56	-1.8344	1.7985e-34	2.1655e-33
PGSC0003DMG400000568	929.601	5840.71	-2.6515	1.9369e-34	2.3282e-33
PGSC0003DMG400002544	658.884	2298.48	-1.8026	2.1117e-34	2.5361e-33
PGSC0003DMG400028069	7925.9	21329.8	-1.4282	2.1855e-34	2.6237e-33
PGSC0003DMG400016599	35.9712	428.212	-3.5734	2.4575e-34	2.9453e-33
PGSC0003DMG400035539	378.463	1348.08	-1.8327	2.7002e-34	3.2308e-33
PGSC0003DMG400004398	66.4636	434.14	-2.7075	3.0761e-34	3.6759e-33
PGSC0003DMG400002998	1579.06	4532.35	-1.5212	3.2669e-34	3.8989e-33
PGSC0003DMG400015854	112.815	582.938	-2.3694	3.3596e-34	4.0063e-33
PGSC0003DMG400008287	317.413	1172.68	-1.8854	3.3762e-34	4.0227e-33
PGSC0003DMG400031248	1042.67	3123.68	-1.583	3.6687e-34	4.3676e-33
Novel01320	110.951	581.368	-2.3895	3.7708e-34	4.4854e-33
PGSC0003DMG400023495	562.295	4266.59	-2.9237	3.818e-34	4.5378e-33
PGSC0003DMG400020211	3688.59	12571.4	-1.769	4.3338e-34	5.1423e-33
PGSC0003DMG400025740	1771.18	5049.09	-1.5113	4.5018e-34	5.3372e-33
Novel03342	1550.69	4459.6	-1.524	4.5971e-34	5.4479e-33
PGSC0003DMG400029551	1940.15	5440.29	-1.4875	4.6825e-34	5.5469e-33
PGSC0003DMG400021498	165.739	740.321	-2.1592	4.9442e-34	5.852e-33
Novel00795	3020.47	8309.12	-1.4599	4.9898e-34	5.9011e-33
PGSC0003DMG400003385	2450.59	10765.9	-2.1353	4.9994e-34	5.9088e-33
PGSC0003DMG402001346	389.066	1361.1	-1.8067	5.0134e-34	5.9216e-33
PGSC0003DMG400008853	3499.57	9515.38	-1.4431	5.2644e-34	6.2129e-33
PGSC0003DMG400002149	745.974	3210.27	-2.1055	5.3327e-34	6.291e-33
PGSC0003DMG400018149	4941.98	13273.3	-1.4254	5.5895e-34	6.5912e-33
PGSC0003DMG400000544	6075.31	16220.9	-1.4168	5.9286e-34	6.9852e-33
PGSC0003DMG400028343	1022.75	3031.03	-1.5674	5.9971e-34	7.0631e-33
PGSC0003DMG400027207	508.723	1677.45	-1.7213	6.4069e-34	7.5426e-33
Novel01451	276.901	1052.33	-1.9261	6.5047e-34	7.6546e-33
PGSC0003DMG402028565	652.108	2070.07	-1.6665	7.9936e-34	9.3874e-33
Novel02287	3067.32	8345.05	-1.4439	8.2351e-34	9.6631e-33
PGSC0003DMG400008454	172.289	760.544	-2.1422	8.9864e-34	1.0527e-32
PGSC0003DMG400021424	1259.83	3664.7	-1.5405	9.2579e-34	1.0837e-32
PGSC0003DMG400032773	41.2702	335.965	-3.0251	9.3226e-34	1.0908e-32
PGSC0003DMG400005646	554.713	1813.51	-1.709	1.0107e-33	1.1806e-32
PGSC0003DMG400023670	5260.82	14094.2	-1.4217	1.0931e-33	1.2748e-32
Novel02381	1298.18	6334.6	-2.2868	1.1419e-33	1.33e-32
PGSC0003DMG400023270	20312.2	53118.7	-1.3869	1.2527e-33	1.4568e-32
PGSC0003DMG400025489	113.318	612.029	-2.4332	1.2657e-33	1.4713e-32
PGSC0003DMG402024649	1884.52	5266.04	-1.4825	1.3126e-33	1.5246e-32
PGSC0003DMG400025456	1001.91	5160.54	-2.3648	1.4944e-33	1.7301e-32
PGSC0003DMG400029660	426.204	1457.64	-1.774	1.5006e-33	1.7365e-32
Novel01561	1963.92	5456.28	-1.4742	1.5131e-33	1.7503e-32
PGSC0003DMG400020718	390.891	1358.67	-1.7974	1.5154e-33	1.7522e-32
PGSC0003DMG400009397	244.523	956.098	-1.9672	1.552e-33	1.7924e-32
PGSC0003DMG400012155	401.39	1379.92	-1.7815	1.6826e-33	1.9417e-32
PGSC0003DMG400005622	2782.92	7596.36	-1.4487	2.0361e-33	2.3468e-32
PGSC0003DMG400024206	202.341	841.783	-2.0567	2.0551e-33	2.3677e-32
PGSC0003DMG400019909	582.085	2363.31	-2.0215	2.2076e-33	2.5424e-32
Novel02944	1463.48	4169.3	-1.5104	2.2624e-33	2.6034e-32
PGSC0003DMG401011206	1649.29	4676.32	-1.5035	2.2802e-33	2.6229e-32
Novel03468	119.347	1227.93	-3.363	2.6328e-33	3.0259e-32
PGSC0003DMG400012024	4.09536	157.586	-5.266	2.6463e-33	3.0402e-32
PGSC0003DMG400028923	921.708	2752.04	-1.5781	2.7071e-33	3.1089e-32
PGSC0003DMG400004986	20163.3	74168.6	-1.8791	2.842e-33	3.2585e-32
PGSC0003DMG400012328	1062.68	3115.29	-1.5517	2.9001e-33	3.3239e-32
PGSC0003DMG400032551	742.901	2282.31	-1.6193	2.9016e-33	3.3242e-32
PGSC0003DMG400015591	686.486	2873.02	-2.0653	3.3087e-33	3.7845e-32
Novel01633	1023.35	3019.45	-1.561	3.3279e-33	3.8034e-32
PGSC0003DMG400005130	700.592	2171.99	-1.6324	3.7582e-33	4.2918e-32
PGSC0003DMG400009893	1294.18	3709.28	-1.5191	3.7933e-33	4.3302e-32
PGSC0003DMG400004588	8632.83	23123.4	-1.4214	3.8238e-33	4.3632e-32
Novel00182	2336.42	6400.07	-1.4538	4.1524e-33	4.7363e-32
PGSC0003DMG400020717	1278.66	3646.87	-1.512	4.4923e-33	5.1199e-32
PGSC0003DMG400006672	1083.6	7858.81	-2.8585	4.5028e-33	5.1299e-32
PGSC0003DMG400026863	1097.64	3193.24	-1.5406	4.5598e-33	5.1927e-32
PGSC0003DMG400009462	18.4589	453.15	-4.6176	4.6134e-33	5.2517e-32
PGSC0003DMG400001606	1031.66	3024.29	-1.5516	5.3644e-33	6.0993e-32
PGSC0003DMG400004734	425.338	3114.93	-2.8725	5.3821e-33	6.117e-32
PGSC0003DMG400010608	1173.09	3372.9	-1.5237	5.6457e-33	6.4114e-32
PGSC0003DMG400001679	243.74	1041.09	-2.0947	6.14e-33	6.97e-32
Novel03426	167.843	730.615	-2.122	6.7019e-33	7.5988e-32
PGSC0003DMG400013421	1362.35	5037.89	-1.8867	6.7063e-33	7.6008e-32
PGSC0003DMG400006071	6.81367	211.908	-4.9589	6.8136e-33	7.7164e-32
PGSC0003DMG400036874	268.608	1021.61	-1.9273	7.5037e-33	8.4878e-32
PGSC0003DMG400029303	578.1	1820.65	-1.6551	7.9839e-33	9.0238e-32
PGSC0003DMG400008934	979.009	2893.88	-1.5636	8.7924e-33	9.9336e-32
PGSC0003DMG400026413	1165.23	4049.18	-1.797	9.5904e-33	1.0822e-31
PGSC0003DMG400003985	34343.7	88131.8	-1.3596	9.6522e-33	1.0888e-31
PGSC0003DMG400029773	375.85	2037.91	-2.4389	1.0266e-32	1.1567e-31
PGSC0003DMG400021245	172.192	748.925	-2.1208	1.3821e-32	1.5511e-31
PGSC0003DMG400027715	89.8656	496.866	-2.467	1.4118e-32	1.5838e-31
PGSC0003DMG400030507	814.676	3017.41	-1.889	1.5158e-32	1.6985e-31
PGSC0003DMG403015876	375.546	1298.35	-1.7896	1.556e-32	1.7422e-31
PGSC0003DMG400007711	4450.32	11721.4	-1.3972	1.6099e-32	1.801e-31
Novel00319	4323.1	12078.6	-1.4823	1.6174e-32	1.8088e-31
Novel00370	2991.71	7984.79	-1.4163	2.1034e-32	2.345e-31
PGSC0003DMG400017300	817.825	2442.1	-1.5783	2.1915e-32	2.4422e-31
Novel03216	15.7375	221.018	-3.8119	2.4066e-32	2.6757e-31
PGSC0003DMG400029498	407.507	3684.57	-3.1766	2.4799e-32	2.7561e-31
PGSC0003DMG400013313	5588.23	16162.6	-1.5322	2.6889e-32	2.9825e-31
Novel01449	452.59	1486.1	-1.7153	2.7196e-32	3.0154e-31
PGSC0003DMG400032154	1644.94	4529.66	-1.4614	2.7495e-32	3.0473e-31
PGSC0003DMG401019682	1085.03	3140.62	-1.5333	2.7616e-32	3.0596e-31
PGSC0003DMG400013290	299.975	1735.18	-2.5322	2.8373e-32	3.1422e-31
PGSC0003DMG400019303	3641.88	9659.87	-1.4073	3.0054e-32	3.3271e-31
PGSC0003DMG402010056	342.635	1370.69	-2.0002	3.162e-32	3.4965e-31
PGSC0003DMG400024035	2661.26	10746.9	-2.0137	3.2832e-32	3.6277e-31
PGSC0003DMG400007322	1119.95	3205.4	-1.5171	3.6914e-32	4.0739e-31
PGSC0003DMG400011977	989.408	2875.25	-1.539	3.8325e-32	4.2264e-31
PGSC0003DMG400011801	880.01	2597.98	-1.5618	3.8349e-32	4.2274e-31
PGSC0003DMG400029638	398.899	1350.44	-1.7593	3.8882e-32	4.2846e-31
Novel03484	5808.27	14982.3	-1.3671	4.2959e-32	4.7283e-31
PGSC0003DMG400027412	705.236	2122.93	-1.5899	4.4753e-32	4.922e-31
PGSC0003DMG400020699	334.82	1696.43	-2.341	4.6675e-32	5.1294e-31
PGSC0003DMG400030017	3439.9	9102.63	-1.4039	4.7471e-32	5.2089e-31
PGSC0003DMG400024915	1818.35	6335.54	-1.8008	4.8346e-32	5.3009e-31
PGSC0003DMG400025463	1491.65	4139.49	-1.4725	5.0545e-32	5.5356e-31
Novel02729	408.359	1518.81	-1.895	5.0674e-32	5.5475e-31
PGSC0003DMG400001371	10.3191	344.907	-5.0628	5.1821e-32	5.671e-31
PGSC0003DMG400019459	123.077	796.305	-2.6938	5.3184e-32	5.8156e-31
PGSC0003DMG400009197	430.168	1444.29	-1.7474	5.3781e-32	5.8787e-31
PGSC0003DMG400007024	272.351	1899.15	-2.8018	5.6913e-32	6.2162e-31
PGSC0003DMG400017747	67.1911	410.715	-2.6118	5.8575e-32	6.3954e-31
Novel01445	26.1267	265.422	-3.3447	6.8507e-32	7.4598e-31
PGSC0003DMG400007123	7.65177	177.496	-4.5358	7.0028e-32	7.6138e-31
PGSC0003DMG400016341	2172.87	14666.5	-2.7549	7.4952e-32	8.143e-31
Novel02848	1869.94	5051.72	-1.4338	7.7788e-32	8.4479e-31
PGSC0003DMG400000957	14.7285	213.849	-3.8599	7.8717e-32	8.5455e-31
Novel02105	36.9069	770.617	-4.3841	9.2758e-32	1.0036e-30
PGSC0003DMG402007612	912.417	2647.33	-1.5368	9.4525e-32	1.0219e-30
PGSC0003DMG402026150	556.145	1740.55	-1.646	9.6498e-32	1.0428e-30
PGSC0003DMG400006345	152.626	675.29	-2.1455	9.7282e-32	1.0509e-30
PGSC0003DMG400021722	5045.57	19586.8	-1.9568	9.762e-32	1.0542e-30
PGSC0003DMG400005659	2037.96	11670.8	-2.5177	9.9593e-32	1.0747e-30
PGSC0003DMG402005842	126.14	595.964	-2.2402	1.0603e-31	1.1437e-30
PGSC0003DMG400025663	1380.68	3840.97	-1.4761	1.1421e-31	1.2301e-30
PGSC0003DMG400006800	162.916	703.373	-2.1102	1.2324e-31	1.3268e-30
PGSC0003DMG400008887	1316.17	3662.99	-1.4767	1.3094e-31	1.4081e-30
Novel03487	387.76	1302.27	-1.7478	1.3496e-31	1.4502e-30
Novel03170	80.8822	633.458	-2.9694	1.3788e-31	1.4811e-30
PGSC0003DMG400023478	1457.99	4018.33	-1.4626	1.5072e-31	1.616e-30
Novel01485	58.4608	382.421	-2.7096	1.5092e-31	1.6176e-30
PGSC0003DMG400019737	1501.49	4120.95	-1.4566	1.6508e-31	1.768e-30
PGSC0003DMG400024728	3224.76	8468.76	-1.393	1.7518e-31	1.874e-30
PGSC0003DMG400011833	134.303	629.529	-2.2288	1.8092e-31	1.9347e-30
PGSC0003DMG400019565	710.881	2140.49	-1.5903	1.818e-31	1.9434e-30
PGSC0003DMG400018641	2230	6003.08	-1.4287	1.8897e-31	2.0193e-30
PGSC0003DMG400018566	1053.76	3530.71	-1.7444	2.0513e-31	2.1895e-30
PGSC0003DMG400000408	707.88	2923.69	-2.0462	2.058e-31	2.1959e-30
PGSC0003DMG400009185	29.0465	274.111	-3.2383	2.0892e-31	2.2283e-30
PGSC0003DMG402016226	6303.77	16195.8	-1.3613	2.1522e-31	2.2937e-30
PGSC0003DMG400002851	742.247	3215.83	-2.1152	2.2583e-31	2.4051e-30
PGSC0003DMG400011805	4130.94	10761.2	-1.3813	2.3013e-31	2.4499e-30
PGSC0003DMG400024429	42.6752	329.159	-2.9473	2.4057e-31	2.5592e-30
PGSC0003DMG402019209	1270.7	3544.73	-1.4801	2.5254e-31	2.6855e-30
PGSC0003DMG402004033	546.113	1736.42	-1.6688	2.5318e-31	2.6913e-30
PGSC0003DMG401015202	4271.93	11028	-1.3682	2.5331e-31	2.6917e-30
PGSC0003DMG400026544	1017.83	9867.43	-3.2772	2.5465e-31	2.705e-30
PGSC0003DMG400022889	4538.74	11773.8	-1.3752	2.567e-31	2.7257e-30
PGSC0003DMG400027776	1431.9	3924.95	-1.4547	2.6107e-31	2.771e-30
Novel00416	60.5696	389.121	-2.6836	2.6664e-31	2.8291e-30
Novel02251	1134.87	3177.23	-1.4852	2.6947e-31	2.8581e-30
PGSC0003DMG400009003	74.8431	435.149	-2.5396	2.6986e-31	2.8611e-30
Novel00579	59.5522	381.396	-2.6791	2.9377e-31	3.1112e-30
PGSC0003DMG400003086	3035.45	7964.28	-1.3916	2.964e-31	3.1379e-30
PGSC0003DMG403015682	308.292	1083.49	-1.8133	3.2576e-31	3.4436e-30
PGSC0003DMG401018785	31.6564	287.489	-3.1829	3.5176e-31	3.7096e-30
PGSC0003DMG400000981	18.3881	227.029	-3.626	3.5271e-31	3.7175e-30
PGSC0003DMG400015420	51.0332	356.797	-2.8056	3.6277e-31	3.8207e-30
PGSC0003DMG400004784	14485.7	36476	-1.3323	3.6429e-31	3.8353e-30
Novel02750	279.954	1009.28	-1.8501	3.84e-31	4.0369e-30
PGSC0003DMG400029397	1560.58	4249.14	-1.4451	4.0003e-31	4.2007e-30
PGSC0003DMG404008678	147.987	646.348	-2.1268	4.2454e-31	4.4549e-30
PGSC0003DMG401020789	291.446	1043.33	-1.8399	4.2803e-31	4.4882e-30
PGSC0003DMG401001347	1374.83	3814.47	-1.4722	4.4725e-31	4.688e-30
PGSC0003DMG401019668	78.5555	441.174	-2.4896	4.6434e-31	4.8654e-30
PGSC0003DMG400006706	138.544	620.231	-2.1625	4.9874e-31	5.222e-30
PGSC0003DMG400004042	6081.79	15487.5	-1.3485	5.0212e-31	5.2555e-30
PGSC0003DMG400003891	143.426	1373.59	-3.2596	5.2616e-31	5.501e-30
PGSC0003DMG400031482	546	1696.99	-1.636	5.4303e-31	5.667e-30
Novel01860	4386.69	11258.8	-1.3598	5.436e-31	5.6709e-30
PGSC0003DMG402000528	185.538	754.158	-2.0232	5.8474e-31	6.0911e-30
Novel03239	3659.47	10010.3	-1.4518	6.4942e-31	6.7575e-30
PGSC0003DMG400007574	181.164	738.865	-2.028	6.669e-31	6.9344e-30
Novel02913	56.6841	368.154	-2.6993	7.6298e-31	7.9191e-30
PGSC0003DMG400026030	9470.79	23991.6	-1.341	7.7761e-31	8.0621e-30
PGSC0003DMG400025996	2133.54	5682.77	-1.4133	8.0411e-31	8.3278e-30
PGSC0003DMG400006089	2778.89	7238.14	-1.3811	8.317e-31	8.6073e-30
Novel03018	2034.36	5410.96	-1.4113	8.9541e-31	9.26e-30
PGSC0003DMG400000808	332.023	1132.91	-1.7707	9.2133e-31	9.521e-30
PGSC0003DMG400030341	1641.25	18493.5	-3.4941	9.4813e-31	9.7874e-30
PGSC0003DMG400015790	517.234	1816.6	-1.8124	1.0923e-30	1.1248e-29
PGSC0003DMG402021097	1282.21	3538.69	-1.4646	1.1947e-30	1.2284e-29
PGSC0003DMG400006250	143.16	823.599	-2.5243	1.2069e-30	1.2405e-29
PGSC0003DMG400010778	1376.16	3734.83	-1.4404	1.2316e-30	1.2654e-29
Novel00744	428.681	2631.91	-2.6181	1.2524e-30	1.2858e-29
PGSC0003DMG400019344	21.1355	272.188	-3.6869	1.3373e-30	1.3711e-29
PGSC0003DMG400031868	9.68695	183.545	-4.2439	1.4385e-30	1.4737e-29
PGSC0003DMG400032108	1229.08	3413.52	-1.4737	1.4958e-30	1.5314e-29
PGSC0003DMG400002778	7437.24	18673.1	-1.3281	1.4982e-30	1.5333e-29
Novel00399	1303.06	4138.14	-1.6671	1.5686e-30	1.6048e-29
PGSC0003DMG400010913	2373.93	6246.1	-1.3957	1.6154e-30	1.6521e-29
Novel00017	36.3845	298.529	-3.0365	1.6359e-30	1.6724e-29
PGSC0003DMG400003160	1522.71	4107.81	-1.4317	1.667e-30	1.7036e-29
PGSC0003DMG400021996	291.686	1031.26	-1.8219	1.8561e-30	1.8948e-29
PGSC0003DMG400001776	389.272	1293.93	-1.7329	1.9929e-30	2.0337e-29
PGSC0003DMG400003667	55.3108	362.051	-2.7106	2.0283e-30	2.0684e-29
PGSC0003DMG400016384	42.8772	319.237	-2.8963	2.1336e-30	2.1727e-29
PGSC0003DMG400012685	2602.02	6817.82	-1.3897	2.175e-30	2.2124e-29
Novel02161	2492.39	6499.95	-1.3829	2.2532e-30	2.2879e-29
Novel00784	1796.72	5257.57	-1.549	2.284e-30	2.3184e-29
PGSC0003DMG400022918	225.26	1932.63	-3.1009	2.3604e-30	2.3942e-29
PGSC0003DMG400024216	7884.25	19817.4	-1.3297	2.3754e-30	2.4086e-29
PGSC0003DMG400015117	2052.53	5439.11	-1.406	2.3858e-30	2.4183e-29
PGSC0003DMG400000164	687.667	2046.86	-1.5736	2.5116e-30	2.5449e-29
PGSC0003DMG400019830	243.007	1006.2	-2.0498	2.6527e-30	2.6851e-29
PGSC0003DMG402009541	178.834	891.275	-2.3172	2.7456e-30	2.778e-29
PGSC0003DMG400003465	609.621	1950	-1.6775	2.7497e-30	2.7812e-29
Novel00148	28.6312	266.45	-3.2182	2.9498e-30	2.9804e-29
PGSC0003DMG400016317	22.5234	243.35	-3.4335	3.0326e-30	3.0631e-29
PGSC0003DMG400010519	688.265	2028.74	-1.5595	3.088e-30	3.1168e-29
Novel01044	2459.59	6392.52	-1.378	3.1702e-30	3.1974e-29
PGSC0003DMG400025886	1210.45	3314.42	-1.4532	3.2084e-30	3.2348e-29
PGSC0003DMG401001013	242.047	892.093	-1.8819	3.5324e-30	3.5566e-29
PGSC0003DMG402011364	426.239	1369.22	-1.6836	3.5918e-30	3.6151e-29
Novel01160	1780.14	4702.65	-1.4015	4.5359e-30	4.5492e-29
Novel02127	293.101	1027.09	-1.8091	4.5998e-30	4.6117e-29
PGSC0003DMG400004754	368.635	1224.05	-1.7314	5.1759e-30	5.1803e-29
PGSC0003DMG400025957	2917.05	7553.5	-1.3726	5.6889e-30	5.6877e-29
PGSC0003DMG400010170	348.932	2178.51	-2.6423	5.7328e-30	5.7296e-29
PGSC0003DMG400027712	44.5014	473.8	-3.4124	5.7656e-30	5.7584e-29
PGSC0003DMG400020137	52.1279	350.849	-2.7507	5.9658e-30	5.9542e-29
PGSC0003DMG400024561	1418.15	3805.48	-1.4241	6.0478e-30	6.0318e-29
PGSC0003DMG400029841	904.634	9262.43	-3.356	7.0357e-30	6.9975e-29
PGSC0003DMG400010352	848.471	2425.57	-1.5154	7.468e-30	7.4223e-29
PGSC0003DMG400018373	195.134	1626.09	-3.0589	7.598e-30	7.5462e-29
Novel03136	498.894	1556.2	-1.6412	9.5761e-30	9.4878e-29
PGSC0003DMG400008158	2849.94	7330.64	-1.363	1.0371e-29	1.0265e-28
Novel02495	57.9095	368.759	-2.6708	1.0517e-29	1.0406e-28
PGSC0003DMG400003897	415.827	1834.1	-2.141	1.0575e-29	1.0459e-28
PGSC0003DMG400029659	6185.94	15432.2	-1.3189	1.0986e-29	1.0862e-28
PGSC0003DMG400014918	887.036	2511.59	-1.5015	1.1186e-29	1.1056e-28
PGSC0003DMG400020522	1267.17	3454.28	-1.4468	1.1752e-29	1.1604e-28
PGSC0003DMG400005459	2921.74	7479.26	-1.3561	1.2021e-29	1.1864e-28
PGSC0003DMG400024333	1756.5	5023.85	-1.5161	1.2602e-29	1.2434e-28
PGSC0003DMG400007622	204.31	788.713	-1.9487	1.4043e-29	1.3841e-28
PGSC0003DMG400017645	87.4762	458.402	-2.3897	1.411e-29	1.3902e-28
PGSC0003DMG400015880	892.21	2523.47	-1.5	1.4374e-29	1.4158e-28
Novel03016	50.9787	343.788	-2.7536	1.4434e-29	1.4212e-28
PGSC0003DMG400012672	819.716	2335.14	-1.5103	1.5386e-29	1.5134e-28
PGSC0003DMG400012603	432.891	1387.56	-1.6805	1.8815e-29	1.8468e-28
PGSC0003DMG400031154	385.521	1603.72	-2.0565	2.0389e-29	1.9973e-28
PGSC0003DMG402005133	734.509	2130.44	-1.5363	2.1706e-29	2.1248e-28
PGSC0003DMG400003906	365.72	1890.59	-2.37	2.1894e-29	2.141e-28
PGSC0003DMG400028980	251.996	903.671	-1.8424	2.1986e-29	2.1493e-28
PGSC0003DMG400023925	10840.3	26462.5	-1.2875	2.2969e-29	2.2446e-28
PGSC0003DMG400014416	2.98155	130.729	-5.4544	2.3345e-29	2.2805e-28
PGSC0003DMG400028318	481.51	1483.54	-1.6234	2.3393e-29	2.2845e-28
PGSC0003DMG402008471	757.059	2164.34	-1.5155	2.3568e-29	2.3008e-28
Novel03529	75.1205	415.084	-2.4661	2.3673e-29	2.3102e-28
PGSC0003DMG400009565	18.5941	221.412	-3.5738	2.3761e-29	2.3181e-28
PGSC0003DMG400030952	664.734	1940.59	-1.5456	2.3796e-29	2.3207e-28
PGSC0003DMG400026525	162.219	669.908	-2.046	2.4019e-29	2.3416e-28
PGSC0003DMG400004295	54.0493	437.101	-3.0156	2.5605e-29	2.4945e-28
Novel01411	4.73216	144.056	-4.928	2.6934e-29	2.6231e-28
PGSC0003DMG400027705	44.014	313.554	-2.8327	2.7029e-29	2.6315e-28
PGSC0003DMG400007062	712.776	2846.43	-1.9976	2.9788e-29	2.8961e-28
PGSC0003DMG400024113	0.562893	107.028	-7.5709	3.092e-29	3.0052e-28
Novel01530	1450.13	3849.77	-1.4086	3.0993e-29	3.0112e-28
PGSC0003DMG402030236	161.168	658.881	-2.0315	3.1017e-29	3.0126e-28
PGSC0003DMG400000708	75955.5	313212	-2.0439	3.1253e-29	3.0334e-28
PGSC0003DMG400009163	3024.82	7687.54	-1.3457	3.2296e-29	3.1303e-28
Novel03076	1726.06	4499.92	-1.3824	3.2969e-29	3.1934e-28
Novel01756	1441.51	3817.49	-1.405	3.4406e-29	3.3292e-28
Novel03234	527.941	1861.91	-1.8183	4.0106e-29	3.8756e-28
PGSC0003DMG400017935	612.529	2091.46	-1.7717	4.049e-29	3.9114e-28
PGSC0003DMG402009338	37.1877	288.507	-2.9557	4.1412e-29	3.9991e-28
PGSC0003DMG400017637	312.426	1667.45	-2.4161	4.2983e-29	4.148e-28
PGSC0003DMG400003447	46.9694	324.986	-2.7906	4.3516e-29	4.198e-28
PGSC0003DMG400025786	248.824	1105.12	-2.151	4.7701e-29	4.594e-28
PGSC0003DMG400013343	7513.5	18518.4	-1.3014	4.8333e-29	4.6533e-28
PGSC0003DMG400025459	603.73	5154.78	-3.0939	4.8971e-29	4.7131e-28
PGSC0003DMG402001013	392.366	1247.89	-1.6692	5.137e-29	4.9423e-28
PGSC0003DMG400016781	17990.7	43775.9	-1.2829	5.1563e-29	4.9576e-28
PGSC0003DMG400020376	181.506	745.469	-2.0381	5.689e-29	5.4679e-28
PGSC0003DMG400012294	103.639	1059.7	-3.354	5.7471e-29	5.5219e-28
PGSC0003DMG401013333	8473.97	20683.4	-1.2874	5.9819e-29	5.7435e-28
PGSC0003DMG400009705	124.898	553.516	-2.1479	5.9999e-29	5.7589e-28
PGSC0003DMG400018820	231.455	839.889	-1.8595	6.0147e-29	5.7693e-28
Novel03344	93.8183	470.995	-2.3278	6.2831e-29	6.0207e-28
PGSC0003DMG400031137	405.925	1906.47	-2.2316	6.5185e-29	6.2441e-28
PGSC0003DMG402003973	91.5002	462.249	-2.3368	6.6495e-29	6.3675e-28
Novel01702	2550.47	6450.92	-1.3387	6.8116e-29	6.5184e-28
PGSC0003DMG400006239	227.896	829.867	-1.8645	6.8423e-29	6.5455e-28
PGSC0003DMG400013147	1981.16	5406.36	-1.4483	6.9057e-29	6.604e-28
PGSC0003DMG400003902	1552.02	4119.43	-1.4083	7.051e-29	6.7407e-28
PGSC0003DMG400037616	66.9104	388.839	-2.5389	7.0976e-29	6.783e-28
PGSC0003DMG400002759	4852.8	11994.3	-1.3055	7.5223e-29	7.184e-28
PGSC0003DMG400006479	750.368	2121.11	-1.4991	7.7908e-29	7.438e-28
Novel02214	208.972	786.859	-1.9128	7.9036e-29	7.5431e-28
PGSC0003DMG400001298	2242.25	5775.78	-1.3651	9.1476e-29	8.7159e-28
PGSC0003DMG400003000	4176.48	10328	-1.3062	9.185e-29	8.7485e-28
PGSC0003DMG400006132	194.354	937.899	-2.2707	9.9314e-29	9.4469e-28
Novel00015	549.378	1635.15	-1.5736	1.0164e-28	9.6645e-28
Novel02422	2475.84	6291.7	-1.3455	1.0238e-28	9.7319e-28
PGSC0003DMG401021124	233.948	946.813	-2.0169	1.0665e-28	1.0131e-27
PGSC0003DMG400000894	130.839	620.402	-2.2454	1.0947e-28	1.0392e-27
PGSC0003DMG401009270	1992.49	5149.78	-1.3699	1.095e-28	1.0392e-27
PGSC0003DMG400028736	13519.3	50085.5	-1.8894	1.1097e-28	1.0528e-27
PGSC0003DMG400027009	1014.07	2766	-1.4476	1.1905e-28	1.1287e-27
PGSC0003DMG400000826	2283.08	5818.97	-1.3498	1.3521e-28	1.2802e-27
PGSC0003DMG400024323	12.7965	186.743	-3.8672	1.4334e-28	1.3558e-27
Novel02567	53.7139	345.487	-2.6853	1.4846e-28	1.4038e-27
PGSC0003DMG400005889	2230.81	7479.72	-1.7454	1.5015e-28	1.4189e-27
PGSC0003DMG400015971	1600.91	4209.35	-1.3947	1.6417e-28	1.5498e-27
PGSC0003DMG400005261	994.945	3764.12	-1.9196	1.7311e-28	1.633e-27
Novel02216	499.54	1515.37	-1.601	1.7338e-28	1.6351e-27
PGSC0003DMG400016328	4668.16	11820.2	-1.3403	1.759e-28	1.6583e-27
Novel02936	10.6245	174.85	-4.0407	1.8546e-28	1.7467e-27
PGSC0003DMG400001863	2538.58	6366.05	-1.3264	1.9553e-28	1.8391e-27
PGSC0003DMG400007408	1109.01	2982.9	-1.4274	1.9901e-28	1.8712e-27
PGSC0003DMG400019853	164.873	662.339	-2.0062	1.999e-28	1.879e-27
PGSC0003DMG400009704	305.827	1572.25	-2.362	2.0212e-28	1.8992e-27
PGSC0003DMG401016322	1591.65	4133.82	-1.377	2.1467e-28	2.0132e-27
Novel00646	27.3868	307.196	-3.4876	2.3332e-28	2.1843e-27
PGSC0003DMG400008989	6323.75	17490	-1.4677	2.3338e-28	2.1843e-27
PGSC0003DMG401008471	383.022	1226.18	-1.6787	2.3535e-28	2.202e-27
PGSC0003DMG400012162	201.846	757.885	-1.9087	2.4866e-28	2.325e-27
PGSC0003DMG401007901	212.461	781.34	-1.8788	2.4946e-28	2.3316e-27
PGSC0003DMG400030105	13.9041	190.805	-3.7785	2.4952e-28	2.3316e-27
PGSC0003DMG400027126	102.292	845.747	-3.0475	2.5376e-28	2.3704e-27
PGSC0003DMG400025493	103.332	492.325	-2.2523	2.575e-28	2.4045e-27
PGSC0003DMG400027594	1612.5	4144.43	-1.3619	2.6392e-28	2.4637e-27
Novel02119	41.4356	297.72	-2.845	2.7454e-28	2.5604e-27
PGSC0003DMG400024342	208.992	773.944	-1.8888	2.788e-28	2.5992e-27
PGSC0003DMG400018483	67.778	385.239	-2.5069	3.4743e-28	3.2348e-27
PGSC0003DMG401008875	213.967	785.594	-1.8764	3.5671e-28	3.3202e-27
PGSC0003DMG400031084	2640.1	31096.8	-3.5581	3.6246e-28	3.3726e-27
PGSC0003DMG400014212	11550.8	43648.8	-1.9179	3.92e-28	3.6439e-27
PGSC0003DMG400019502	3123.5	7709.61	-1.3035	3.9577e-28	3.6778e-27
PGSC0003DMG400020086	9522.43	22975.1	-1.2707	3.9666e-28	3.6848e-27
PGSC0003DMG402012656	24.0181	232.098	-3.2725	4.8532e-28	4.4967e-27
PGSC0003DMG400004771	2433.83	12345.4	-2.3427	4.9431e-28	4.5785e-27
Novel01365	1345.6	3550.52	-1.3998	5.1068e-28	4.7287e-27
PGSC0003DMG402028577	205.997	762.813	-1.8887	5.2259e-28	4.8373e-27
Novel01667	2116.82	5352.31	-1.3383	5.2502e-28	4.8582e-27
Novel03605	1172.36	3105.1	-1.4052	5.799e-28	5.3608e-27
Novel03299	5187.9	14763.7	-1.5088	6.0168e-28	5.5569e-27
PGSC0003DMG400011248	545.064	1617.02	-1.5688	6.6456e-28	6.1237e-27
Novel01962	93.0459	457.463	-2.2976	6.9483e-28	6.4005e-27
PGSC0003DMG400030468	36.1099	281.107	-2.9607	7.1921e-28	6.6231e-27
PGSC0003DMG400026455	13.5472	188.506	-3.7985	7.2465e-28	6.6688e-27
Novel01719	3582.09	13816.6	-1.9475	7.7147e-28	7.0906e-27
PGSC0003DMG400025129	293.186	986.115	-1.7499	8.1933e-28	7.5232e-27
Novel01858	4.38566	134.714	-4.941	8.4236e-28	7.7297e-27
PGSC0003DMG401020445	159.819	699.61	-2.1301	8.5986e-28	7.8877e-27
PGSC0003DMG400013140	1373.29	3564.74	-1.3762	8.9654e-28	8.2189e-27
PGSC0003DMG400030051	47.8035	395.474	-3.0484	9.2715e-28	8.4968e-27
Novel02525	1936.48	4877.84	-1.3328	9.453e-28	8.6604e-27
PGSC0003DMG400008644	3076.26	7557.87	-1.2968	9.5937e-28	8.7837e-27
PGSC0003DMG400010853	209.5	882.919	-2.0753	9.9489e-28	9.1001e-27
PGSC0003DMG402015682	103.204	484.929	-2.2323	1.0074e-27	9.2113e-27
PGSC0003DMG400020569	3266.53	20507.1	-2.6503	1.0303e-27	9.4152e-27
Novel00314	1558.54	4014.89	-1.3652	1.039e-27	9.4917e-27
PGSC0003DMG400006795	267.124	907.134	-1.7638	1.063e-27	9.7078e-27
PGSC0003DMG400009384	1958.89	9877.81	-2.3342	1.0742e-27	9.8033e-27
PGSC0003DMG400020909	73.4006	806.081	-3.4571	1.1509e-27	1.0487e-26
Novel00475	393.756	1229.07	-1.6422	1.1584e-27	1.0552e-26
PGSC0003DMG400022987	4360.39	10603.4	-1.282	1.2063e-27	1.0984e-26
PGSC0003DMG400008459	552.102	1600.5	-1.5355	1.2642e-27	1.1504e-26
Novel03451	552.66	1618.82	-1.5505	1.3253e-27	1.2053e-26
PGSC0003DMG400021716	4123.29	29791.6	-2.853	1.3301e-27	1.2089e-26
PGSC0003DMG400000619	498.203	4051.07	-3.0235	1.3318e-27	1.21e-26
PGSC0003DMG400005665	7070.78	16947.7	-1.2611	1.3679e-27	1.2425e-26
PGSC0003DMG400018645	399.696	1228.54	-1.62	1.3953e-27	1.2669e-26
PGSC0003DMG400014672	2445.81	6077.58	-1.3132	1.4432e-27	1.3096e-26
PGSC0003DMG400030366	8782.16	81938	-3.2219	1.4511e-27	1.3164e-26
PGSC0003DMG402018896	207.194	758	-1.8712	1.5782e-27	1.4303e-26
PGSC0003DMG400022827	238.161	1162.69	-2.2875	1.6037e-27	1.4529e-26
PGSC0003DMG400016721	512.214	3375.09	-2.7201	1.6352e-27	1.481e-26
PGSC0003DMG400006219	376.914	1180.86	-1.6475	1.8174e-27	1.645e-26
PGSC0003DMG400011395	7546.97	30081	-1.9949	1.8205e-27	1.6473e-26
PGSC0003DMG400001099	319.746	1039.79	-1.7013	1.8348e-27	1.6597e-26
PGSC0003DMG400025145	2365.37	5901.58	-1.319	1.8499e-27	1.6728e-26
PGSC0003DMG400023453	12773.6	30426.1	-1.2521	1.8871e-27	1.7059e-26
PGSC0003DMG400012278	3201.23	7839.76	-1.2922	1.9439e-27	1.7561e-26
PGSC0003DMG400004938	1438.58	3707.23	-1.3657	2.0789e-27	1.8775e-26
PGSC0003DMG400016589	4342.68	10558.9	-1.2818	2.1117e-27	1.9065e-26
Novel03094	1278.63	3377.34	-1.4013	2.3013e-27	2.0757e-26
Novel02665	175.618	675.345	-1.9432	2.3068e-27	2.08e-26
Novel02477	22.4247	264.527	-3.5603	2.3294e-27	2.0998e-26
Novel01542	698.189	2592.52	-1.8927	2.3343e-27	2.1035e-26
PGSC0003DMG400030793	815.718	2213.73	-1.4403	2.5048e-27	2.255e-26
PGSC0003DMG400028407	359.437	1928.05	-2.4233	2.5308e-27	2.2777e-26
Novel01701	2268.78	5614.21	-1.3072	2.5764e-27	2.3173e-26
PGSC0003DMG400017615	189.57	708.012	-1.901	2.6153e-27	2.3515e-26
Novel00690	48.8053	456.534	-3.2256	2.6185e-27	2.3537e-26
Novel03304	67.8042	377.934	-2.4787	2.7055e-27	2.4288e-26
PGSC0003DMG400024543	84.9735	423.066	-2.3158	2.7194e-27	2.4405e-26
PGSC0003DMG400024154	2589.02	6438.78	-1.3144	2.9955e-27	2.685e-26
Novel01437	1051.43	2798.3	-1.4122	3.0757e-27	2.7551e-26
PGSC0003DMG400028217	307.416	1000.07	-1.7018	3.4604e-27	3.0958e-26
Novel00261	9.16728	200.097	-4.4481	3.467e-27	3.1007e-26
Novel01200	3148.27	7710.75	-1.2923	3.6308e-27	3.2422e-26
PGSC0003DMG400026475	759.052	2087.99	-1.4598	3.6743e-27	3.279e-26
PGSC0003DMG400018125	49.5715	321.522	-2.6973	3.6762e-27	3.2796e-26
Novel02034	1012.65	2695.23	-1.4123	3.9568e-27	3.5256e-26
PGSC0003DMG400009082	1990.59	4972.08	-1.3207	4.218e-27	3.756e-26
Novel00679	46.2705	306.381	-2.7272	4.2366e-27	3.7702e-26
PGSC0003DMG400026141	1.77456	111.027	-5.9673	4.2518e-27	3.7826e-26
PGSC0003DMG401025754	26.6641	237.656	-3.1559	4.469e-27	3.9733e-26
Novel02164	185.265	688.646	-1.8942	4.738e-27	4.2099e-26
PGSC0003DMG402005674	234.344	819.577	-1.8062	4.744e-27	4.2139e-26
PGSC0003DMG400003319	320.89	1031.34	-1.6844	4.9255e-27	4.3724e-26
PGSC0003DMG400028325	58.6391	367.646	-2.6484	4.9459e-27	4.3891e-26
PGSC0003DMG401008881	285.339	1487.66	-2.3823	5.0981e-27	4.5228e-26
PGSC0003DMG401016766	235.865	815.517	-1.7898	5.1182e-27	4.5392e-26
PGSC0003DMG400023685	310.634	1005.46	-1.6946	6.5265e-27	5.7792e-26
PGSC0003DMG400010031	249.238	858.926	-1.785	6.8928e-27	6.096e-26
PGSC0003DMG400016481	388.661	1205.36	-1.6329	6.9918e-27	6.1817e-26
PGSC0003DMG400007187	560.936	1613.09	-1.5239	7.2176e-27	6.3754e-26
PGSC0003DMG400011670	530.193	1531.71	-1.5305	7.2763e-27	6.4233e-26
Novel00069	32.4229	256.293	-2.9827	7.4138e-27	6.5427e-26
PGSC0003DMG400006939	403.86	1235.27	-1.6129	7.5935e-27	6.6929e-26
PGSC0003DMG400021310	1143.23	2980.6	-1.3825	8.0852e-27	7.1176e-26
PGSC0003DMG400015226	458.507	1360.49	-1.5691	8.4841e-27	7.4596e-26
Novel02949	68.071	372.38	-2.4517	8.7639e-27	7.7008e-26
Novel00991	1709.29	6412.6	-1.9075	8.9461e-27	7.8561e-26
PGSC0003DMG400009614	247.431	844.182	-1.7705	9.9209e-27	8.696e-26
PGSC0003DMG400030427	177.775	674.381	-1.9235	1.0188e-26	8.9247e-26
PGSC0003DMG400010847	571.014	1667.71	-1.5463	1.0719e-26	9.3844e-26
PGSC0003DMG400026262	3056.67	11192.8	-1.8725	1.2129e-26	1.0612e-25
PGSC0003DMG400029778	7329.53	17292.9	-1.2384	1.2246e-26	1.0704e-25
PGSC0003DMG401010883	4.24876	131.258	-4.9492	1.2509e-26	1.0928e-25
PGSC0003DMG400011370	2310.99	34979.5	-3.9199	1.532e-26	1.3355e-25
PGSC0003DMG400001661	3152.79	12628.8	-2.002	1.5465e-26	1.3477e-25
Novel03635	3002.03	7251.93	-1.2724	1.5662e-26	1.3645e-25
PGSC0003DMG400026584	4029.81	9569.28	-1.2477	1.6057e-26	1.3984e-25
PGSC0003DMG400014862	460.696	2987.14	-2.6969	1.6114e-26	1.403e-25
Novel02899	121.266	1383.6	-3.5122	1.642e-26	1.4288e-25
PGSC0003DMG400022674	0.871407	216.947	-7.9598	1.6429e-26	1.4291e-25
PGSC0003DMG400001935	2125.07	5250.15	-1.3048	1.6533e-26	1.4373e-25
Novel01066	552.233	1792.46	-1.6986	1.732e-26	1.5048e-25
PGSC0003DMG400020360	162.913	626.331	-1.9428	1.7411e-26	1.5122e-25
PGSC0003DMG400008025	2954.19	7151.78	-1.2755	1.8712e-26	1.6237e-25
PGSC0003DMG400017103	13.5019	190.628	-3.8195	1.8739e-26	1.6256e-25
Novel02029	3000.66	7205.86	-1.2639	1.8804e-26	1.6307e-25
Novel00439	1069.8	2781.47	-1.3785	1.9359e-26	1.6784e-25
Novel01061	1187.53	3045.02	-1.3585	2.0039e-26	1.7358e-25
Novel03262	1043.78	2720.96	-1.3823	2.0334e-26	1.7603e-25
PGSC0003DMG400005773	1171.68	3030.11	-1.3708	2.3197e-26	2.0062e-25
PGSC0003DMG400026319	4703.36	11183	-1.2495	2.4046e-26	2.0791e-25
PGSC0003DMG401006809	133.149	552.281	-2.0524	2.6157e-26	2.2575e-25
PGSC0003DMG401013464	39.3223	276.801	-2.8154	2.7815e-26	2.3998e-25
PGSC0003DMG400033168	73.7673	386.001	-2.3876	2.969e-26	2.5577e-25
PGSC0003DMG400028514	1228.69	3153.78	-1.36	3.1582e-26	2.715e-25
PGSC0003DMG400024388	4428.83	10593.8	-1.2582	3.201e-26	2.7501e-25
PGSC0003DMG400004602	1413.2	3544.35	-1.3266	3.3789e-26	2.9004e-25
PGSC0003DMG400006406	929.644	2447.1	-1.3963	3.5275e-26	3.0252e-25
PGSC0003DMG400040232	665.654	1832.27	-1.4608	3.5756e-26	3.0647e-25
PGSC0003DMG400021056	39.8392	369.411	-3.213	3.5794e-26	3.0669e-25
PGSC0003DMG400006097	4352.94	10337.7	-1.2479	3.6559e-26	3.1306e-25
Novel03556	7555.99	17723.3	-1.23	3.8962e-26	3.3314e-25
PGSC0003DMG400029153	68.5529	634.108	-3.2094	3.9546e-26	3.3804e-25
Novel03560	2426.69	5886.05	-1.2783	4.1156e-26	3.5159e-25
PGSC0003DMG400023572	246.521	840.487	-1.7695	4.3274e-26	3.6946e-25
PGSC0003DMG400012701	1457.38	3650.71	-1.3248	4.3326e-26	3.6979e-25
PGSC0003DMG400015392	1254.5	3201.29	-1.3515	4.4392e-26	3.7866e-25
PGSC0003DMG400013300	446.792	1316.41	-1.5589	4.5069e-26	3.8432e-25
Novel00217	1423.91	3596.81	-1.3369	4.5754e-26	3.8981e-25
PGSC0003DMG400020436	1204.95	3080.6	-1.3542	4.633e-26	3.9448e-25
PGSC0003DMG400018408	92.1604	1170.53	-3.6669	4.7301e-26	4.0264e-25
PGSC0003DMG400013659	17.8022	238.123	-3.7416	4.9405e-26	4.203e-25
PGSC0003DMG400009374	498.89	2280.7	-2.1927	4.9984e-26	4.251e-25
PGSC0003DMG400023323	1012.91	2626.34	-1.3745	5.0759e-26	4.3155e-25
PGSC0003DMG400013305	556.693	5030.97	-3.1759	5.13e-26	4.3603e-25
Novel02118	393.257	1196.25	-1.605	5.1812e-26	4.4025e-25
Novel00987	149.354	586.571	-1.9736	5.3232e-26	4.5178e-25
Novel00405	264.622	875.657	-1.7264	5.4678e-26	4.6377e-25
Novel00412	102.406	464.399	-2.1811	5.8118e-26	4.9251e-25
PGSC0003DMG400024953	1029.39	2670.34	-1.3752	6.0434e-26	5.1169e-25
PGSC0003DMG400009353	803.505	2144.15	-1.416	6.3547e-26	5.3725e-25
PGSC0003DMG400010180	210.792	735.182	-1.8023	6.4021e-26	5.4093e-25
PGSC0003DMG400027722	75.9277	519.224	-2.7737	6.5966e-26	5.5687e-25
PGSC0003DMG400003632	292.162	3175.98	-3.4424	6.6344e-26	5.599e-25
PGSC0003DMG400009276	353.817	1095.33	-1.6303	6.7316e-26	5.6794e-25
Novel01058	11056.3	25507.5	-1.206	6.8205e-26	5.7526e-25
Novel00913	896.296	4935.15	-2.461	7.1079e-26	5.9933e-25
PGSC0003DMG400024322	1302.39	3313.59	-1.3472	7.1304e-26	6.0105e-25
Novel02757	3373.23	8066.22	-1.2578	7.2317e-26	6.0923e-25
PGSC0003DMG400021815	400.586	1447.83	-1.8537	7.6357e-26	6.425e-25
PGSC0003DMG400024263	178.744	661.771	-1.8884	8.0376e-26	6.7573e-25
PGSC0003DMG400010083	174.692	643.881	-1.882	8.3949e-26	7.0514e-25
PGSC0003DMG400005754	871.342	2298.65	-1.3995	8.535e-26	7.167e-25
PGSC0003DMG400000980	1564.08	3876.08	-1.3093	9.0783e-26	7.6143e-25
PGSC0003DMG402024877	569.371	1596.3	-1.4873	9.3734e-26	7.8525e-25
PGSC0003DMG400009773	766.598	2068.84	-1.4323	9.3878e-26	7.8623e-25
PGSC0003DMG400021511	38.9903	301.481	-2.9509	9.4232e-26	7.8896e-25
PGSC0003DMG401019352	110.45	478.716	-2.1158	9.481e-26	7.9357e-25
Novel02048	67.2005	363.247	-2.4344	9.622e-26	8.049e-25
Novel03139	7796.98	18009.3	-1.2078	9.7199e-26	8.1285e-25
PGSC0003DMG400004583	2458.48	7383.68	-1.5866	9.7659e-26	8.1646e-25
PGSC0003DMG400027321	1252.82	3181.54	-1.3445	1.0125e-25	8.4573e-25
PGSC0003DMG400001559	479.188	2207.08	-2.2035	1.0543e-25	8.8015e-25
PGSC0003DMG400008921	7843.6	22705.7	-1.5335	1.0632e-25	8.8732e-25
Novel02507	67.4902	358.357	-2.4086	1.0942e-25	9.1289e-25
PGSC0003DMG400024980	171.364	640.509	-1.9022	1.1118e-25	9.2678e-25
Novel02992	1278.43	3232.6	-1.3383	1.1193e-25	9.328e-25
PGSC0003DMG400023148	7394.59	17104.3	-1.2098	1.1516e-25	9.5883e-25
PGSC0003DMG400020237	2041.56	4935.14	-1.2734	1.1695e-25	9.7347e-25
Novel01601	360.269	1244.11	-1.788	1.2625e-25	1.05e-24
PGSC0003DMG400019358	4218.12	9933.45	-1.2357	1.269e-25	1.0551e-24
PGSC0003DMG400039453	39.8071	278.26	-2.8053	1.2922e-25	1.074e-24
PGSC0003DMG400002884	673.87	1827.27	-1.4391	1.3142e-25	1.0913e-24
PGSC0003DMG400026051	914.651	2381.41	-1.3805	1.416e-25	1.1739e-24
PGSC0003DMG400001556	1003.49	2579.38	-1.362	1.4797e-25	1.2246e-24
PGSC0003DMG400004979	44.118	353.252	-3.0013	1.4906e-25	1.2332e-24
Novel01205	28.0475	232.768	-3.0529	1.617e-25	1.3363e-24
PGSC0003DMG400009141	743.313	2199.34	-1.565	1.6718e-25	1.3811e-24
PGSC0003DMG400002435	12.7107	171.272	-3.7522	1.8011e-25	1.4858e-24
PGSC0003DMG400018239	2515.89	6209.1	-1.3033	1.871e-25	1.5426e-24
PGSC0003DMG400010007	2724.96	6540.2	-1.2631	1.9218e-25	1.5835e-24
PGSC0003DMG400002238	44.8328	290.437	-2.6956	2.0107e-25	1.6549e-24
PGSC0003DMG400002560	617.792	2204.75	-1.8354	2.1158e-25	1.7389e-24
PGSC0003DMG400026009	28.0951	234.067	-3.0585	2.4133e-25	1.98e-24
Novel03456	1672.44	4090.67	-1.2904	2.5916e-25	2.1232e-24
PGSC0003DMG400019479	987.741	2519.41	-1.3509	2.7233e-25	2.2285e-24
PGSC0003DMG400030790	544.865	1754.53	-1.6871	2.7254e-25	2.2296e-24
PGSC0003DMG400023416	1804.44	7067.19	-1.9696	2.9151e-25	2.3827e-24
PGSC0003DMG400001148	15345.6	35355.5	-1.2041	3.1006e-25	2.5301e-24
Novel00164	1.15441	98.8928	-6.4206	3.2048e-25	2.6128e-24
PGSC0003DMG400031314	126.558	622.473	-2.2982	3.6319e-25	2.9569e-24
Novel01712	2823.98	6683.31	-1.2428	3.7504e-25	3.0498e-24
PGSC0003DMG400022201	2611.41	6184	-1.2437	3.8155e-25	3.101e-24
PGSC0003DMG402000668	2522.39	6001.17	-1.2505	3.934e-25	3.1964e-24
PGSC0003DMG400015603	1378.91	3408.72	-1.3057	4.0501e-25	3.2889e-24
PGSC0003DMG400020793	2.2651	108.237	-5.5785	4.0669e-25	3.3015e-24
PGSC0003DMG400019392	1889.13	4597.9	-1.2832	4.1922e-25	3.4014e-24
PGSC0003DMG401013522	169.809	633.173	-1.8987	4.2358e-25	3.4358e-24
PGSC0003DMG400037844	14.2204	175.958	-3.6292	4.2573e-25	3.4522e-24
PGSC0003DMG400009837	394.776	1788.22	-2.1794	4.3954e-25	3.5622e-24
PGSC0003DMG400013662	332.283	1676.64	-2.3351	4.4484e-25	3.6031e-24
PGSC0003DMG400033584	434.145	1251.78	-1.5277	4.7498e-25	3.844e-24
PGSC0003DMG400001414	6607.66	15127.2	-1.1949	4.8765e-25	3.9443e-24
PGSC0003DMG400017731	1437.79	3877.9	-1.4314	4.9719e-25	4.0191e-24
PGSC0003DMG400012675	4195.05	9758.59	-1.218	5.2219e-25	4.2164e-24
PGSC0003DMG400033912	1071.08	3956.29	-1.8851	5.6548e-25	4.5609e-24
PGSC0003DMG400019647	7953.67	18349.3	-1.206	5.8307e-25	4.7001e-24
PGSC0003DMG400002213	115.647	489.337	-2.0811	5.8554e-25	4.7174e-24
Novel01271	157.924	603.462	-1.934	5.949e-25	4.79e-24
PGSC0003DMG400002301	172.402	882.869	-2.3564	6.0349e-25	4.8578e-24
Novel02484	224.546	766.264	-1.7708	6.2991e-25	5.0634e-24
PGSC0003DMG401024877	220.712	761.003	-1.7857	6.394e-25	5.1382e-24
PGSC0003DMG400008563	480.529	1362.59	-1.5037	6.5775e-25	5.2768e-24
PGSC0003DMG400013761	1769.04	6507.03	-1.879	6.6747e-25	5.3532e-24
PGSC0003DMG400019034	16.83	185.36	-3.4612	6.6964e-25	5.3692e-24
PGSC0003DMG400003578	126.287	517.961	-2.0361	7.0477e-25	5.6477e-24
PGSC0003DMG400025222	816.882	2127.26	-1.3808	7.1249e-25	5.7063e-24
Novel03096	7.81142	146.098	-4.2252	7.1716e-25	5.7421e-24
PGSC0003DMG400022380	1839.8	4412.46	-1.262	7.5017e-25	5.993e-24
PGSC0003DMG400025192	2198.04	11161.8	-2.3443	8.1099e-25	6.4752e-24
Novel00503	258.645	835.067	-1.6909	8.3355e-25	6.6461e-24
Novel03325	38.3621	261.756	-2.7705	8.7254e-25	6.9511e-24
PGSC0003DMG400021241	1307.6	3214.29	-1.2976	9.3767e-25	7.4679e-24
PGSC0003DMG400032190	7921.47	19279	-1.2832	9.658e-25	7.6898e-24
Novel00775	570.662	1559.87	-1.4507	1.0789e-24	8.5735e-24
Novel02573	64.312	342.085	-2.4112	1.1381e-24	9.0416e-24
PGSC0003DMG400026666	291.173	916.389	-1.6541	1.1391e-24	9.047e-24
PGSC0003DMG400030635	535.869	1473.56	-1.4594	1.1655e-24	9.2511e-24
PGSC0003DMG400005545	122.15	685.527	-2.4886	1.1907e-24	9.4485e-24
PGSC0003DMG400023049	489.249	1364.93	-1.4802	1.256e-24	9.962e-24
Novel03612	506.351	1455.31	-1.5231	1.2915e-24	1.0232e-23
Novel01023	4395.78	10167.6	-1.2098	1.3317e-24	1.0548e-23
PGSC0003DMG402019982	14.9395	186.136	-3.6392	1.3402e-24	1.0612e-23
PGSC0003DMG400005677	3382.48	7888.62	-1.2217	1.371e-24	1.0853e-23
PGSC0003DMG401000859	8986.33	20370.2	-1.1807	1.3816e-24	1.0927e-23
PGSC0003DMG402024702	1048.14	3275.03	-1.6437	1.413e-24	1.1166e-23
PGSC0003DMG400000935	24776	56149.9	-1.1803	1.4292e-24	1.1291e-23
PGSC0003DMG400028230	599.48	2429.25	-2.0187	1.5459e-24	1.22e-23
PGSC0003DMG400020554	99.1291	442.155	-2.1572	1.5826e-24	1.2483e-23
Novel03162	350.484	1062.14	-1.5996	1.5957e-24	1.2582e-23
PGSC0003DMG401005796	1111.16	2788.44	-1.3274	1.6212e-24	1.2776e-23
Novel00609	1248.29	3078.77	-1.3024	1.6309e-24	1.285e-23
PGSC0003DMG400006145	685.378	1838.2	-1.4233	1.648e-24	1.2977e-23
Novel01760	263.422	849.302	-1.6889	1.7292e-24	1.3609e-23
PGSC0003DMG401019999	262.772	846.644	-1.6879	1.9156e-24	1.5055e-23
PGSC0003DMG400011628	327.912	993.489	-1.5992	1.9857e-24	1.5597e-23
Novel00535	946.848	2398.85	-1.3411	2.0248e-24	1.59e-23
PGSC0003DMG402020445	425.78	1225	-1.5246	2.0381e-24	1.6001e-23
PGSC0003DMG402009270	1099.58	2750.01	-1.3225	2.0746e-24	1.6278e-23
Novel02297	1651.43	3993.71	-1.274	2.2399e-24	1.7551e-23
PGSC0003DMG400008571	532.034	1730.63	-1.7017	2.4037e-24	1.8814e-23
Novel01101	1570.81	3798.42	-1.2739	2.437e-24	1.9058e-23
PGSC0003DMG400022143	3067.79	7187.71	-1.2283	2.5301e-24	1.9776e-23
PGSC0003DMG400029165	14.9258	173.598	-3.5399	2.5619e-24	2.0008e-23
PGSC0003DMG400014487	16793.6	56472.3	-1.7496	2.6383e-24	2.0599e-23
PGSC0003DMG402025742	599.926	1616.92	-1.4304	2.8908e-24	2.2546e-23
Novel02311	2685.37	6292	-1.2284	2.9044e-24	2.2645e-23
PGSC0003DMG400002321	166.314	608.086	-1.8704	3.1362e-24	2.4443e-23
PGSC0003DMG400025722	1187.53	2922.18	-1.2991	3.1367e-24	2.4443e-23
PGSC0003DMG400013032	1.75635	131.074	-6.2217	3.2013e-24	2.4933e-23
PGSC0003DMG400003538	335.027	1005.99	-1.5863	3.2076e-24	2.4976e-23
PGSC0003DMG400031518	10.0298	151.102	-3.9131	3.2646e-24	2.5406e-23
PGSC0003DMG400023609	9772.64	22113.7	-1.1781	3.3132e-24	2.577e-23
PGSC0003DMG400023166	229.375	758.178	-1.7248	3.752e-24	2.9128e-23
PGSC0003DMG400015414	1.24029	132.383	-6.7379	3.8571e-24	2.9935e-23
PGSC0003DMG400006879	562.967	1528.97	-1.4414	3.9135e-24	3.0363e-23
PGSC0003DMG400029168	859.826	2200.31	-1.3556	3.9143e-24	3.0363e-23
PGSC0003DMG400025093	454.149	3057.9	-2.7513	4.1536e-24	3.2193e-23
PGSC0003DMG400030199	1.83181	125.002	-6.0925	4.2042e-24	3.2576e-23
PGSC0003DMG400000977	57.8237	316.389	-2.452	4.4498e-24	3.4432e-23
PGSC0003DMG400031840	309.085	940.429	-1.6053	4.5537e-24	3.5217e-23
Novel03360	2178.21	5159.37	-1.244	4.6043e-24	3.5599e-23
PGSC0003DMG400003728	40.1318	261.926	-2.7063	5.121e-24	3.9562e-23
PGSC0003DMG400012284	2236.63	5256.55	-1.2328	5.174e-24	3.996e-23
PGSC0003DMG400031373	1034.11	2576.06	-1.3168	5.2125e-24	4.0247e-23
PGSC0003DMG400009337	674.21	3573.84	-2.4062	5.8208e-24	4.4883e-23
PGSC0003DMG400006877	2683.77	6206.52	-1.2095	6.0898e-24	4.6919e-23
PGSC0003DMG400003310	1481.6	3576.02	-1.2712	6.1144e-24	4.7096e-23
PGSC0003DMG400001633	1889.52	4464.4	-1.2404	6.3229e-24	4.8676e-23
PGSC0003DMG400030960	6188.25	14031.7	-1.1811	6.3453e-24	4.8836e-23
Novel01219	466.024	1291.05	-1.4701	6.7608e-24	5.2005e-23
Novel03396	1412.83	3405.33	-1.2692	7.138e-24	5.4862e-23
Novel01877	202.708	694.526	-1.7766	7.5507e-24	5.7972e-23
Novel00484	15.483	174.703	-3.4961	7.5912e-24	5.8267e-23
PGSC0003DMG400028524	4891.04	10996.7	-1.1689	7.7541e-24	5.9501e-23
PGSC0003DMG400019289	381.243	1113.32	-1.5461	7.8727e-24	6.0379e-23
PGSC0003DMG400008402	457.096	1833.54	-2.0041	7.9281e-24	6.0787e-23
PGSC0003DMG400014664	104.993	445.714	-2.0858	8.5126e-24	6.5217e-23
Novel01518	920.691	3202.09	-1.7982	9.4999e-24	7.2664e-23
PGSC0003DMG400000172	444.937	1251.23	-1.4917	1.0021e-23	7.659e-23
PGSC0003DMG400046446	179.284	718.751	-2.0032	1.1234e-23	8.572e-23
PGSC0003DMG400003147	210.198	715.096	-1.7664	1.1954e-23	9.1095e-23
PGSC0003DMG400021253	1114.98	2744.9	-1.2997	1.2585e-23	9.5802e-23
Novel02390	1448.49	3471.68	-1.2611	1.26e-23	9.5892e-23
Novel02340	332.52	985.174	-1.5669	1.2615e-23	9.5981e-23
PGSC0003DMG400023407	430.032	1209.49	-1.4919	1.3423e-23	1.0205e-22
PGSC0003DMG401016141	2092.44	4882.2	-1.2223	1.38e-23	1.0486e-22
PGSC0003DMG400009299	383.804	1108.11	-1.5297	1.3894e-23	1.0554e-22
PGSC0003DMG401028785	1232.97	2998.11	-1.2819	1.4272e-23	1.0837e-22
PGSC0003DMG400002799	288.724	891.898	-1.6272	1.4274e-23	1.0837e-22
Novel00162	109.664	457.474	-2.0606	1.4929e-23	1.1328e-22
PGSC0003DMG400003663	112.605	460.726	-2.0326	1.5266e-23	1.1578e-22
PGSC0003DMG401024702	560.917	1628.84	-1.538	1.5487e-23	1.1742e-22
PGSC0003DMG400025758	666.016	1736.3	-1.3824	1.6052e-23	1.2161e-22
PGSC0003DMG400003073	345.407	1014.39	-1.5542	1.7221e-23	1.3033e-22
Novel01037	44.1355	270.552	-2.6159	1.7517e-23	1.3253e-22
PGSC0003DMG400023668	285.165	886.168	-1.6358	1.7586e-23	1.3301e-22
Novel02830	7.39584	134.469	-4.1844	1.7589e-23	1.3301e-22
PGSC0003DMG400025407	400.212	1134.64	-1.5034	1.774e-23	1.3411e-22
Novel03551	34.2707	238.087	-2.7964	1.7939e-23	1.3554e-22
PGSC0003DMG400002563	2997.91	6842.73	-1.1906	1.9105e-23	1.4424e-22
PGSC0003DMG400004412	384.909	1111.3	-1.5297	2.019e-23	1.5227e-22
Novel00628	60.7369	319.733	-2.3962	2.0436e-23	1.5407e-22
Novel00417	36.014	249.588	-2.7929	2.0802e-23	1.5676e-22
PGSC0003DMG401030272	220.766	731.387	-1.7281	2.1041e-23	1.5852e-22
PGSC0003DMG400013826	618.581	1623.46	-1.392	2.2308e-23	1.6776e-22
PGSC0003DMG400029195	6459.86	14757.2	-1.1918	2.3143e-23	1.7399e-22
PGSC0003DMG400024901	1316.64	4588.38	-1.8011	2.339e-23	1.758e-22
PGSC0003DMG400019574	817.302	2071.15	-1.3415	2.379e-23	1.7876e-22
PGSC0003DMG400026392	194.595	663.301	-1.7692	2.3834e-23	1.7905e-22
PGSC0003DMG402007600	604.027	1595.56	-1.4014	2.404e-23	1.8055e-22
PGSC0003DMG402025422	468.196	1282.95	-1.4543	2.4073e-23	1.8075e-22
PGSC0003DMG401029709	12.5478	182.557	-3.8628	2.4378e-23	1.8294e-22
PGSC0003DMG400006376	76.2435	452.253	-2.5684	2.469e-23	1.8524e-22
PGSC0003DMG401027811	37.7354	253.669	-2.749	2.7041e-23	2.025e-22
PGSC0003DMG400009952	18367.7	45872.6	-1.3205	2.7159e-23	2.0333e-22
Novel00441	56.6173	331.106	-2.548	2.8193e-23	2.1091e-22
PGSC0003DMG401002606	84.196	387.537	-2.2025	2.8267e-23	2.1141e-22
Novel00356	432.473	1207.09	-1.4808	2.8724e-23	2.1465e-22
PGSC0003DMG400026715	2160.24	5011.78	-1.2141	3.2081e-23	2.3956e-22
PGSC0003DMG400006748	231.123	747.391	-1.6932	3.2965e-23	2.4603e-22
PGSC0003DMG400020546	749.152	1917.99	-1.3563	3.338e-23	2.4886e-22
Novel03476	6501.95	14434.7	-1.1506	3.552e-23	2.6454e-22
PGSC0003DMG400029282	237.279	755.783	-1.6714	3.5944e-23	2.6749e-22
PGSC0003DMG400005935	689.005	1775.26	-1.3654	3.7167e-23	2.7652e-22
PGSC0003DMG401004066	2585.01	5884.34	-1.1867	3.9499e-23	2.9371e-22
PGSC0003DMG400012414	7.44735	131.568	-4.1429	4.1822e-23	3.1074e-22
PGSC0003DMG402030679	742.282	1890.63	-1.3488	4.2853e-23	3.1824e-22
Novel00833	336.367	990.163	-1.5576	4.296e-23	3.1896e-22
PGSC0003DMG400030332	700.832	2221.19	-1.6642	4.6028e-23	3.4138e-22
PGSC0003DMG400017211	922.814	2277.04	-1.303	4.687e-23	3.4753e-22
Novel00481	54.439	299.112	-2.458	5.0991e-23	3.7769e-22
PGSC0003DMG400034304	6002.33	13325.8	-1.1506	5.411e-23	4.0038e-22
PGSC0003DMG400021867	68.4847	337.967	-2.303	5.5099e-23	4.076e-22
Novel01554	13.1743	157.433	-3.5789	5.5671e-23	4.1172e-22
PGSC0003DMG400004920	631.653	1640.2	-1.3767	5.6469e-23	4.1752e-22
PGSC0003DMG400009940	22559.4	49283.3	-1.1274	5.8457e-23	4.3199e-22
PGSC0003DMG400007578	1641.76	3841.39	-1.2264	5.882e-23	4.3456e-22
PGSC0003DMG400017305	1104.68	2666.13	-1.2711	5.9263e-23	4.3761e-22
PGSC0003DMG400013890	2361.79	5395.77	-1.1919	6.2845e-23	4.6393e-22
PGSC0003DMG400043194	39.0871	254.34	-2.702	6.3439e-23	4.682e-22
Novel03315	110.646	530.849	-2.2623	6.5131e-23	4.7994e-22
PGSC0003DMG401020229	1835.22	4247.95	-1.2108	6.8081e-23	5.0117e-22
PGSC0003DMG400003061	247.545	781.354	-1.6583	7.0642e-23	5.1961e-22
PGSC0003DMG401015928	682.571	1745.96	-1.355	7.3556e-23	5.4091e-22
Novel02433	0.281446	79.5545	-8.1429	7.3843e-23	5.4288e-22
PGSC0003DMG400015330	1548.25	3631	-1.2297	8.1841e-23	6.006e-22
PGSC0003DMG400025994	571.396	1514.54	-1.4063	8.5471e-23	6.266e-22
PGSC0003DMG401014796	387.523	1099.51	-1.5045	8.5663e-23	6.2775e-22
PGSC0003DMG402031202	65.8297	380.587	-2.5314	8.5672e-23	6.2775e-22
PGSC0003DMG400021399	740.821	1879.2	-1.3429	8.6907e-23	6.3647e-22
PGSC0003DMG400022418	1678.81	3911.2	-1.2202	9.0354e-23	6.6138e-22
PGSC0003DMG401024031	766.892	3088.83	-2.01	9.3378e-23	6.8281e-22
PGSC0003DMG402011362	652.874	1680.56	-1.3641	9.3435e-23	6.8306e-22
PGSC0003DMG400002276	37.4261	247.711	-2.7265	9.4423e-23	6.901e-22
PGSC0003DMG400026569	348.255	1150.1	-1.7235	1.0128e-22	7.3981e-22
PGSC0003DMG400005997	2.05289	97.9538	-5.5764	1.0209e-22	7.456e-22
PGSC0003DMG400016997	305.363	909.899	-1.5752	1.178e-22	8.5856e-22
PGSC0003DMG400032255	449.883	1567.24	-1.8006	1.219e-22	8.8819e-22
Novel01726	260.515	805.19	-1.628	1.2725e-22	9.267e-22
PGSC0003DMG400000075	384.911	1084.88	-1.4949	1.3229e-22	9.6244e-22
PGSC0003DMG400001086	61.9254	317.046	-2.3561	1.33e-22	9.6732e-22
Novel00278	963.027	2365.97	-1.2968	1.353e-22	9.8357e-22
PGSC0003DMG400014970	257.435	796.389	-1.6293	1.4235e-22	1.0338e-21
PGSC0003DMG400017448	6219.35	13585.4	-1.1272	1.4464e-22	1.0501e-21
Novel01715	1749.82	4130.64	-1.2392	1.5202e-22	1.1023e-21
PGSC0003DMG400025998	8965.33	19535.6	-1.1237	1.5245e-22	1.1051e-21
PGSC0003DMG400015053	367.647	2644.54	-2.8466	1.5347e-22	1.1122e-21
PGSC0003DMG400004436	1033.46	3335.37	-1.6904	1.5474e-22	1.1212e-21
PGSC0003DMG400026788	1208.11	2874.38	-1.2505	1.5985e-22	1.1579e-21
PGSC0003DMG400013143	102.722	649.257	-2.66	1.6448e-22	1.1906e-21
Novel00163	305.444	2782.47	-3.1874	1.649e-22	1.1933e-21
PGSC0003DMG401025318	1442.63	3373.32	-1.2255	1.6969e-22	1.2276e-21
PGSC0003DMG400010146	10341.9	107786	-3.3816	1.6977e-22	1.2279e-21
PGSC0003DMG400001335	625.588	1614.36	-1.3677	1.8165e-22	1.3128e-21
PGSC0003DMG400005495	989.958	2411.63	-1.2846	1.825e-22	1.3186e-21
PGSC0003DMG400014565	1164.67	2773.2	-1.2516	1.8258e-22	1.3189e-21
PGSC0003DMG400009075	670.627	1709.22	-1.3498	1.91e-22	1.3794e-21
PGSC0003DMG400016059	559.043	1465.06	-1.3899	1.9461e-22	1.4051e-21
PGSC0003DMG405015682	225.831	753.429	-1.7382	2.0028e-22	1.4457e-21
PGSC0003DMG400030198	2.73185	101.531	-5.2159	2.0125e-22	1.4523e-21
PGSC0003DMG400034102	7992.06	17316	-1.1155	2.1472e-22	1.5463e-21
PGSC0003DMG400003536	87.4698	388.235	-2.1501	2.1721e-22	1.5635e-21
PGSC0003DMG400029557	42.1519	256.01	-2.6025	2.1883e-22	1.5748e-21
PGSC0003DMG400033569	226.855	727.347	-1.6809	2.3e-22	1.6543e-21
PGSC0003DMG400027847	242.045	759.775	-1.6503	2.301e-22	1.6547e-21
PGSC0003DMG400027889	112.13	443.666	-1.9843	2.3107e-22	1.6612e-21
PGSC0003DMG400023266	128.187	485.908	-1.9224	2.3551e-22	1.6927e-21
PGSC0003DMG400014497	2454.87	5521.37	-1.1694	2.5904e-22	1.8604e-21
PGSC0003DMG400022176	43.4743	259.967	-2.5801	2.7896e-22	2.0015e-21
PGSC0003DMG400012916	128.269	483.405	-1.9141	2.9006e-22	2.0801e-21
PGSC0003DMG400017719	11753.8	43511.1	-1.8883	3.3801e-22	2.4177e-21
Novel01458	400.809	1114.43	-1.4753	3.4376e-22	2.4578e-21
PGSC0003DMG400016198	60.3988	308.572	-2.353	3.4585e-22	2.4721e-21
PGSC0003DMG400021589	545.528	1420.62	-1.3808	3.5396e-22	2.5288e-21
PGSC0003DMG400006317	7.65801	128.023	-4.0633	3.7102e-22	2.6473e-21
PGSC0003DMG400007145	1515.14	3498.73	-1.2074	3.8825e-22	2.7675e-21
PGSC0003DMG400009928	140.722	1410.06	-3.3248	4.0144e-22	2.8608e-21
PGSC0003DMG400013379	10785.3	38109.1	-1.8211	4.1621e-22	2.9646e-21
PGSC0003DMG402022314	615.843	1574.64	-1.3544	4.1834e-22	2.979e-21
PGSC0003DMG400018227	6993.53	15160.6	-1.1162	4.2417e-22	3.0198e-21
PGSC0003DMG400003220	15.4409	410.585	-4.7328	4.3778e-22	3.1159e-21
PGSC0003DMG400011182	448.034	1220.31	-1.4456	4.4968e-22	3.199e-21
PGSC0003DMG400013895	610.435	1619.72	-1.4078	4.5687e-22	3.2477e-21
PGSC0003DMG400012349	2248.25	5110.47	-1.1847	4.6835e-22	3.3277e-21
PGSC0003DMG400022788	1537.46	6219.88	-2.0163	4.8336e-22	3.4318e-21
PGSC0003DMG400010157	1237.81	5521.95	-2.1574	4.8388e-22	3.4347e-21
PGSC0003DMG402005827	1006.37	2410.03	-1.2599	5.1147e-22	3.6278e-21
PGSC0003DMG400021677	222.075	710.854	-1.6785	5.2684e-22	3.734e-21
PGSC0003DMG400010361	769.492	1895.32	-1.3005	5.3654e-22	3.8018e-21
Novel01404	1375.69	3205.79	-1.2205	5.3979e-22	3.8239e-21
Novel00976	745.397	1849.43	-1.311	5.4084e-22	3.8304e-21
PGSC0003DMG400014722	2509.17	5658.1	-1.1731	5.4971e-22	3.8913e-21
PGSC0003DMG400006083	3401.64	7457.91	-1.1325	5.6198e-22	3.9752e-21
PGSC0003DMG400024707	1658.92	6899.63	-2.0563	5.6821e-22	4.0172e-21
PGSC0003DMG402022316	350.193	987.237	-1.4952	5.8175e-22	4.1089e-21
PGSC0003DMG402013013	446.797	1202.22	-1.428	6.0788e-22	4.2882e-21
Novel03519	707.095	1762.57	-1.3177	6.3794e-22	4.498e-21
Novel02774	602.282	1543.94	-1.3581	6.5105e-22	4.5871e-21
PGSC0003DMG400006096	45.1908	504.572	-3.481	6.5179e-22	4.5911e-21
PGSC0003DMG400025357	1859.36	4216.54	-1.1813	6.6553e-22	4.6844e-21
Novel00577	1509.11	3498.66	-1.2131	6.6809e-22	4.7013e-21
PGSC0003DMG400004761	2192.41	4961.43	-1.1782	6.7273e-22	4.7328e-21
PGSC0003DMG400027876	208.25	670.513	-1.687	6.7997e-22	4.7825e-21
PGSC0003DMG400019856	688.506	1724.69	-1.3248	6.9151e-22	4.8613e-21
Novel01351	1410.4	3560.01	-1.3358	6.943e-22	4.8797e-21
Novel00202	12.551	149.514	-3.5744	7.1304e-22	5.0077e-21
Novel00576	12.8777	190.727	-3.8886	7.1521e-22	5.0205e-21
Novel01622	142.252	517.659	-1.8636	7.2173e-22	5.065e-21
PGSC0003DMG401010943	121.55	465.788	-1.9381	7.399e-22	5.19e-21
PGSC0003DMG400023647	12.718	151.532	-3.5747	7.5713e-22	5.3096e-21
PGSC0003DMG400009544	1034.67	17550	-4.0842	7.9614e-22	5.5777e-21
PGSC0003DMG400022320	835.374	4107.98	-2.2979	8.2387e-22	5.7663e-21
PGSC0003DMG400030625	885.392	2165.66	-1.2904	8.4437e-22	5.9068e-21
PGSC0003DMG400023195	1844.34	4196.85	-1.1862	8.5943e-22	6.0107e-21
PGSC0003DMG400019717	1733.85	3990.61	-1.2026	8.7257e-22	6.0997e-21
PGSC0003DMG401010673	36.9922	235.337	-2.6694	8.8607e-22	6.1925e-21
PGSC0003DMG400005097	4418.03	9675.15	-1.1309	8.8982e-22	6.2172e-21
Novel00443	1131	2665.69	-1.2369	9.0367e-22	6.3094e-21
Novel00226	184.621	613.093	-1.7315	9.695e-22	6.7591e-21
Novel00791	21.6569	184.736	-3.0926	1.0223e-21	7.1216e-21
Novel00419	4.03966	108.155	-4.7427	1.0356e-21	7.211e-21
PGSC0003DMG400006719	110.309	435.898	-1.9824	1.0516e-21	7.3206e-21
PGSC0003DMG400006056	506.33	1329.54	-1.3928	1.0534e-21	7.3314e-21
Novel00333	31.6525	223.326	-2.8188	1.0555e-21	7.3446e-21
PGSC0003DMG400012566	30.0225	212.079	-2.8205	1.0603e-21	7.3756e-21
Novel00890	5902.29	20709.8	-1.811	1.1151e-21	7.7536e-21
PGSC0003DMG400021140	25.3047	198.687	-2.973	1.1261e-21	7.8279e-21
Novel02174	1075.56	2532.53	-1.2355	1.1375e-21	7.9031e-21
PGSC0003DMG400015367	243.528	1479.76	-2.6032	1.3052e-21	9.0485e-21
PGSC0003DMG400017693	1182.42	3347.72	-1.5014	1.3153e-21	9.1163e-21
PGSC0003DMG401031803	4282.04	9292.42	-1.1178	1.3545e-21	9.3858e-21
PGSC0003DMG400001755	1051.6	2484.73	-1.2405	1.3969e-21	9.675e-21
PGSC0003DMG400012426	196.202	1032.72	-2.396	1.4184e-21	9.8189e-21
Novel01944	610.877	1545.95	-1.3395	1.4556e-21	1.0072e-20
Novel00596	6308.43	13556.3	-1.1036	1.4921e-21	1.0317e-20
Novel03528	65.9519	319.505	-2.2764	1.5003e-21	1.0369e-20
PGSC0003DMG400014170	673.329	1743.73	-1.3728	1.5804e-21	1.0912e-20
Novel00975	5846.35	12636.9	-1.112	1.6068e-21	1.1089e-20
PGSC0003DMG400001804	951.552	3392.76	-1.8341	1.6206e-21	1.1178e-20
PGSC0003DMG401024222	613.723	1552.76	-1.3392	1.6212e-21	1.118e-20
PGSC0003DMG400012341	1194.8	2853.92	-1.2562	1.6589e-21	1.1431e-20
PGSC0003DMG400028176	260.725	782.195	-1.585	1.6674e-21	1.1484e-20
PGSC0003DMG400004273	3105.55	6809.88	-1.1328	1.7141e-21	1.1798e-20
PGSC0003DMG400018999	1841.92	5063.77	-1.459	1.7466e-21	1.2013e-20
PGSC0003DMG400030975	177.57	598.228	-1.7523	1.7806e-21	1.2241e-20
Novel02783	195.418	637.573	-1.706	1.913e-21	1.3135e-20
PGSC0003DMG400004630	7130.36	19227.8	-1.4311	1.9601e-21	1.3455e-20
PGSC0003DMG400024887	21562.1	46067.1	-1.0952	2.026e-21	1.3901e-20
PGSC0003DMG400009360	224.774	1408.61	-2.6477	2.0411e-21	1.4001e-20
PGSC0003DMG401007871	41.1765	248.036	-2.5907	2.0468e-21	1.4037e-20
PGSC0003DMG400013426	189.886	616.591	-1.6992	2.068e-21	1.4179e-20
PGSC0003DMG400009144	2155.91	4852.21	-1.1703	2.0878e-21	1.4307e-20
Novel02383	2386.66	14439.8	-2.597	2.1683e-21	1.4852e-20
Novel00317	1015.01	2409.1	-1.247	2.2527e-21	1.5412e-20
PGSC0003DMG400022509	1178.1	2735.27	-1.2152	2.3198e-21	1.5856e-20
Novel00793	1328.4	7138.24	-2.4259	2.3386e-21	1.598e-20
PGSC0003DMG402024517	297.658	865.041	-1.5391	2.4155e-21	1.6494e-20
PGSC0003DMG402014796	771.682	1898.34	-1.2987	2.4446e-21	1.6689e-20
PGSC0003DMG400030601	6.95042	122.707	-4.142	2.5539e-21	1.7431e-20
PGSC0003DMG400009937	216.196	679.768	-1.6527	2.5704e-21	1.7535e-20
PGSC0003DMG400034550	49.6855	270.547	-2.445	2.5794e-21	1.7593e-20
PGSC0003DMG400016778	69.6223	328.487	-2.2382	2.6162e-21	1.7831e-20
PGSC0003DMG400008065	350.411	1411.59	-2.0102	2.6427e-21	1.8007e-20
Novel02532	1905.13	4278.37	-1.1672	2.6674e-21	1.8166e-20
PGSC0003DMG400025707	89.3835	376.47	-2.0745	2.8929e-21	1.9679e-20
PGSC0003DMG400007789	456.553	1207.5	-1.4032	3.036e-21	2.0647e-20
PGSC0003DMG400002929	2739.75	6023.41	-1.1365	3.3108e-21	2.2482e-20
Novel00717	69.01	322.671	-2.2252	3.3113e-21	2.2482e-20
PGSC0003DMG400002486	4312.44	9361.11	-1.1182	3.3692e-21	2.287e-20
PGSC0003DMG400011618	48.5857	417.393	-3.1028	3.4408e-21	2.3351e-20
PGSC0003DMG400027562	127.739	632.858	-2.3087	3.5932e-21	2.4373e-20
PGSC0003DMG400004594	4368.39	9409.4	-1.107	3.6973e-21	2.5067e-20
PGSC0003DMG400016209	419.63	1135.09	-1.4356	3.8289e-21	2.5935e-20
PGSC0003DMG400022427	1.99875	90.3367	-5.4981	3.8531e-21	2.6086e-20
PGSC0003DMG401016772	1011.15	2378.7	-1.2342	3.9228e-21	2.6552e-20
PGSC0003DMG400024888	114.71	438.412	-1.9343	4.113e-21	2.7833e-20
PGSC0003DMG400019731	349.287	972.218	-1.4769	4.1889e-21	2.8333e-20
PGSC0003DMG400031557	14.5003	153.408	-3.4032	4.282e-21	2.8956e-20
PGSC0003DMG400033592	879.545	2101.89	-1.2569	4.4966e-21	3.0392e-20
PGSC0003DMG400030010	351.874	977.704	-1.4743	4.5354e-21	3.0641e-20
PGSC0003DMG400008043	2.29373	92.9092	-5.3401	4.6404e-21	3.1342e-20
PGSC0003DMG400022828	189.037	606.807	-1.6826	4.8719e-21	3.289e-20
PGSC0003DMG400009120	648.271	1609.43	-1.3119	5.1342e-21	3.4628e-20
PGSC0003DMG400004043	574.91	1454.05	-1.3387	5.389e-21	3.6322e-20
PGSC0003DMG400023569	584.498	1480.27	-1.3406	5.4265e-21	3.6565e-20
PGSC0003DMG400007670	952.359	3128.26	-1.7158	5.5663e-21	3.749e-20
Novel00598	137.195	492.936	-1.8452	5.5897e-21	3.763e-20
PGSC0003DMG400039300	882.99	2108.22	-1.2556	5.5915e-21	3.7633e-20
Novel01425	1078.4	2521.59	-1.2254	5.6758e-21	3.8191e-20
Novel01797	49.2271	270.899	-2.4602	5.7043e-21	3.8374e-20
PGSC0003DMG400010034	770.382	2796.39	-1.8599	5.7773e-21	3.8856e-20
PGSC0003DMG401011958	343.692	959.648	-1.4814	6.0177e-21	4.0445e-20
Novel01165	924.215	2184.31	-1.2409	6.0541e-21	4.068e-20
Novel03000	113.133	430.81	-1.929	6.0773e-21	4.0826e-20
PGSC0003DMG401030679	440.611	1166.84	-1.405	6.11e-21	4.1036e-20
PGSC0003DMG400004286	301.618	862.12	-1.5152	6.1607e-21	4.1357e-20
PGSC0003DMG400024671	32.0603	213.276	-2.7339	6.235e-21	4.1845e-20
PGSC0003DMG402017076	238.758	718.747	-1.5899	6.5055e-21	4.3641e-20
[truncated: 3,184 more rows]

## Sheet: X2_12h_Up
TableS4 The up-regulated DEGs of X2 tuters at 12 h after cut-wounding
gene_id	12h_readcount	0h_readcount	log2FoldChange	pval	padj
PGSC0003DMG400014093	25954.4	241.833	6.7458	5.1571e-105	1.4873e-100
PGSC0003DMG400024643	23047.7	269.506	6.4182	2.0262e-97	1.8427e-93
PGSC0003DMG400001119	2653.68	13.0557	7.6672	2.5559e-97	1.8427e-93
PGSC0003DMG400007800	16880.2	254.247	6.053	3.7724e-90	2.1758e-86
PGSC0003DMG400013485	33051.4	695.673	5.5702	1.4502e-81	5.2279e-78
PGSC0003DMG400002790	3767.36	55.1136	6.095	4.3831e-81	1.4045e-77
PGSC0003DMG400026300	9708.61	184.774	5.7154	7.4272e-81	2.1419e-77
PGSC0003DMG400003563	26250.8	211.111	6.9582	4.5825e-79	1.1013e-75
PGSC0003DMG400023815	3480.09	62.3447	5.8027	1.0712e-74	2.2067e-71
PGSC0003DMG400007155	1921.17	29.4498	6.0276	3.9013e-71	7.0318e-68
PGSC0003DMG400011749	34772.1	1132.71	4.9401	1.948e-69	2.9567e-66
PGSC0003DMG400035299	1801.93	28.8733	5.9637	6.1681e-69	8.4706e-66
PGSC0003DMG400004371	798.512	2.03836	8.6138	3.9604e-68	4.7589e-65
PGSC0003DMG400023458	11271.1	360.5	4.9665	5.5743e-67	6.4303e-64
PGSC0003DMG400026944	1513.39	24.6113	5.9423	7.2238e-66	8.0126e-63
PGSC0003DMG400004572	10322.8	351.781	4.875	4.4093e-65	4.5414e-62
PGSC0003DMG400004404	4667.22	145.678	5.0017	2.559e-64	2.5448e-61
Novel00351	29692.2	1115.95	4.7337	3.1465e-64	3.0247e-61
PGSC0003DMG400009418	973.264	10.3455	6.5558	6.8749e-63	6.3957e-60
PGSC0003DMG403006826	2001.2	46.2993	5.4337	1.1751e-62	1.0591e-59
PGSC0003DMG400012288	4521.51	70.7185	5.9986	5.1994e-62	4.2841e-59
PGSC0003DMG400022131	4148.21	126.868	5.0311	5.5517e-62	4.4474e-59
PGSC0003DMG400032124	10199.3	399.616	4.6737	5.5717e-61	4.3428e-58
PGSC0003DMG400014055	18823.5	809.441	4.5395	1.5525e-60	1.148e-57
PGSC0003DMG402001494	64193.4	2760.05	4.5397	8.8984e-60	6.4155e-57
PGSC0003DMG400009825	1354.05	27.7592	5.6082	2.3961e-59	1.6854e-56
PGSC0003DMG400032112	982.545	15.5456	5.9819	2.9189e-59	2.0043e-56
PGSC0003DMG400019274	923.441	13.4891	6.0972	6.7214e-59	4.4054e-56
PGSC0003DMG400004696	56884.8	2644.35	4.4271	2.4933e-58	1.5979e-55
PGSC0003DMG400013894	1345.32	35.1244	5.2593	3.7875e-56	2.2291e-53
PGSC0003DMG400035370	9712.14	454.15	4.4185	9.0948e-56	5.1429e-53
PGSC0003DMG400007241	893.668	14.2844	5.9672	1.028e-55	5.7014e-53
PGSC0003DMG400030546	2125.16	75.7888	4.8094	1.9956e-55	1.0657e-52
PGSC0003DMG401020908	2381.99	88.4744	4.7508	3.3869e-55	1.7759e-52
PGSC0003DMG400032208	1147.72	27.0813	5.4053	4.0647e-55	2.0932e-52
PGSC0003DMG400006461	4000.81	181.301	4.4638	8.8119e-55	4.4583e-52
PGSC0003DMG400024860	8242.61	404.542	4.3487	2.3125e-54	1.1498e-51
PGSC0003DMG400014340	8835.5	429.41	4.3629	2.7943e-54	1.3658e-51
PGSC0003DMG400028119	1067.08	27.4988	5.2782	4.2249e-53	1.8745e-50
PGSC0003DMG400007909	2146.31	87.1266	4.6226	4.7691e-53	2.0839e-50
PGSC0003DMG400031364	37049.2	2069.55	4.1621	7.7783e-53	3.348e-50
PGSC0003DMG402012803	1184.99	34.6455	5.0961	1.1657e-52	4.9439e-50
PGSC0003DMG400018914	3997.89	187.152	4.417	2.1243e-52	8.7517e-50
PGSC0003DMG400004534	1137.89	29.5774	5.2657	2.5405e-52	1.0319e-49
PGSC0003DMG400026301	2906.21	129.589	4.4871	3.7945e-52	1.5198e-49
PGSC0003DMG400020906	10676.2	587.199	4.1844	4.0803e-52	1.612e-49
PGSC0003DMG400014013	1638.75	56.9223	4.8475	7.9165e-52	3.0852e-49
PGSC0003DMG400000850	2963.35	138.692	4.4173	1.3781e-51	5.299e-49
PGSC0003DMG400019323	1812.72	71.178	4.6706	3.7552e-51	1.4065e-48
PGSC0003DMG400010092	20637.8	619.908	5.0571	5.5507e-51	2.0263e-48
PGSC0003DMG400024763	1430.89	52.4495	4.7698	5.9607e-50	1.9989e-47
PGSC0003DMG402027210	4758.94	48.5426	6.6152	1.4915e-49	4.888e-47
PGSC0003DMG400005284	3509.61	184.493	4.2497	4.9002e-49	1.5878e-46
PGSC0003DMG400020710	796.385	18.2929	5.4441	5.4409e-49	1.7275e-46
PGSC0003DMG400000484	1934.25	90.7682	4.4134	5.4511e-49	1.7275e-46
PGSC0003DMG400003865	1087.08	20.6609	5.7174	8.1872e-49	2.5388e-46
PGSC0003DMG400014772	1972.33	89.3137	4.4649	1.678e-48	5.0937e-46
PGSC0003DMG400031365	44352.3	2944.41	3.913	2.6405e-48	7.9322e-46
PGSC0003DMG400014408	5649.06	337.106	4.0667	2.7706e-48	8.2373e-46
PGSC0003DMG400008829	6226.68	370.964	4.0691	1.248e-47	3.6354e-45
PGSC0003DMG400023147	1905.14	93.6739	4.3461	5.7366e-47	1.6062e-44
PGSC0003DMG400010231	947.723	28.6951	5.0456	6.5265e-47	1.8098e-44
PGSC0003DMG400013434	5417.58	344.933	3.9733	6.9097e-47	1.8978e-44
PGSC0003DMG400028331	5591.89	350.686	3.9951	7.6151e-47	2.0718e-44
PGSC0003DMG400001438	4954.37	308.62	4.0048	1.8333e-46	4.9412e-44
PGSC0003DMG400016478	1286.95	54.2992	4.5669	1.9533e-46	5.2158e-44
PGSC0003DMG400014600	680.669	9.42388	6.1745	3.6697e-46	9.7092e-44
PGSC0003DMG400016168	15993.4	972.176	4.0401	7.8581e-46	2.0416e-43
PGSC0003DMG400033591	3356.72	77.0821	5.4445	8.252e-46	2.1248e-43
Novel01691	4440.13	288.707	3.9429	1.3624e-45	3.3871e-43
PGSC0003DMG400010819	1449.11	68.7471	4.3977	2.0553e-45	4.9808e-43
PGSC0003DMG401021549	34905.8	2574.55	3.7611	2.45e-45	5.8879e-43
PGSC0003DMG400020160	1441.39	69.4504	4.3753	4.6034e-45	1.0706e-42
PGSC0003DMG400015211	506.937	8.14901	5.959	6.3031e-45	1.4542e-42
PGSC0003DMG400022013	1426.65	67.9117	4.3928	7.8848e-45	1.7765e-42
PGSC0003DMG400021582	638.83	15.5819	5.3575	2.9589e-44	6.5639e-42
PGSC0003DMG400028953	2854.43	178.854	3.9963	3.7811e-44	8.3238e-42
PGSC0003DMG400009965	2698.93	174.128	3.9542	8.0048e-44	1.7357e-41
PGSC0003DMG400007150	2779.81	176.464	3.9775	9.5195e-44	2.0336e-41
PGSC0003DMG400029264	3301.19	217.252	3.9255	2.0112e-43	4.2029e-41
PGSC0003DMG400019139	455.667	3.69608	6.9458	3.4274e-43	6.8641e-41
PGSC0003DMG400023523	799.665	9.95507	6.3278	3.5153e-43	6.9917e-41
Novel02187	53542	4357.56	3.6191	3.6528e-43	7.2153e-41
PGSC0003DMG400001448	13615.6	1065.8	3.6753	5.0571e-43	9.788e-41
PGSC0003DMG400007059	74759.1	6192.29	3.5937	7.6602e-43	1.4534e-40
PGSC0003DMG400029263	6720.95	506.462	3.7301	8.6901e-43	1.638e-40
PGSC0003DMG400013331	10408.9	801.375	3.6992	1.5336e-42	2.7992e-40
PGSC0003DMG400024016	1815.67	94.6307	4.262	1.6326e-42	2.9611e-40
PGSC0003DMG400032211	1957.76	121.569	4.0094	1.886e-42	3.3994e-40
PGSC0003DMG400025112	1426.68	74.605	4.2572	2.09e-42	3.7436e-40
PGSC0003DMG400028787	1311.69	69.0865	4.2469	2.2975e-42	4.09e-40
PGSC0003DMG400005101	408.381	5.0857	6.3273	4.1373e-42	7.2754e-40
PGSC0003DMG400012966	2418.77	155.385	3.9604	6.0742e-42	1.0553e-39
PGSC0003DMG400008629	445.398	6.53245	6.0913	9.1116e-42	1.5549e-39
PGSC0003DMG400028214	20729	1722.7	3.5889	9.4605e-42	1.6049e-39
PGSC0003DMG400021537	1922	118.031	4.0254	1.1542e-41	1.9465e-39
PGSC0003DMG401028902	1003.12	44.9882	4.4788	1.2164e-41	2.0278e-39
PGSC0003DMG400007122	10097.7	818.633	3.6247	2.0445e-41	3.35e-39
PGSC0003DMG400014223	12667.2	1054.08	3.587	2.2179e-41	3.6136e-39
PGSC0003DMG400007503	409.46	5.98657	6.0958	1.004e-40	1.6086e-38
PGSC0003DMG400015545	1210.84	57.929	4.3856	1.1722e-40	1.8677e-38
PGSC0003DMG400030965	7309.8	616.03	3.5688	3.3156e-40	5.1686e-38
PGSC0003DMG400030995	1846.31	124.728	3.8878	1.348e-39	1.9834e-37
PGSC0003DMG400024950	3841.78	308.137	3.6401	1.8577e-39	2.7057e-37
PGSC0003DMG400008311	2409.16	177.043	3.7664	2.2274e-39	3.2279e-37
PGSC0003DMG400026632	3818.34	308.209	3.631	2.7338e-39	3.942e-37
PGSC0003DMG400029390	13790.7	1222.29	3.496	3.0383e-39	4.3164e-37
PGSC0003DMG400025813	1901.56	132.862	3.8392	4.6086e-39	6.3897e-37
PGSC0003DMG400007405	675.633	9.89174	6.0939	5.0954e-39	7.0309e-37
PGSC0003DMG400029347	1780.33	102.117	4.1238	9.0418e-39	1.2128e-36
PGSC0003DMG400005426	409.967	6.97957	5.8762	9.5854e-39	1.2798e-36
PGSC0003DMG400011436	3684.09	306.802	3.5859	2.1501e-38	2.8057e-36
PGSC0003DMG400023833	331.957	3.75812	6.4648	4.8257e-38	6.1307e-36
PGSC0003DMG400009011	5080.76	151.736	5.0654	5.9375e-38	7.5101e-36
PGSC0003DMG400027893	465.221	11.5517	5.3317	8.2628e-38	1.0361e-35
PGSC0003DMG400007908	1180.37	74.6096	3.9837	1.1459e-37	1.4123e-35
PGSC0003DMG402025438	666.159	26.8699	4.6318	1.3231e-37	1.61e-35
PGSC0003DMG400025989	6502.7	601.071	3.4354	1.4131e-37	1.7123e-35
PGSC0003DMG400026523	12403.7	1195.86	3.3747	1.6408e-37	1.9716e-35
PGSC0003DMG400016420	3181.11	269.213	3.5627	1.6642e-37	1.9914e-35
PGSC0003DMG400029788	51626.9	1620.76	4.9934	1.7951e-37	2.1392e-35
PGSC0003DMG400021596	683.786	30.0338	4.5089	1.843e-37	2.1872e-35
PGSC0003DMG400000684	921.479	8.89385	6.695	1.8979e-37	2.2432e-35
Novel00373	654.255	27.9383	4.5495	2.0644e-37	2.4103e-35
PGSC0003DMG400033882	490.821	14.1169	5.1197	2.305e-37	2.6804e-35
PGSC0003DMG400023955	3229.65	277.248	3.5421	2.5806e-37	2.9888e-35
PGSC0003DMG400028330	653.23	26.1768	4.6412	3.487e-37	4.0224e-35
PGSC0003DMG400031775	8816.83	196.008	5.4913	3.508e-37	4.0305e-35
PGSC0003DMG400020742	5867.21	279.712	4.3907	4.673e-37	5.3479e-35
PGSC0003DMG400028675	4596.8	423.248	3.4411	6.3816e-37	7.2457e-35
PGSC0003DMG400013111	387.896	6.91041	5.8108	1.0509e-36	1.1886e-34
PGSC0003DMG400000922	503.798	16.1619	4.9622	1.1812e-36	1.3254e-34
PGSC0003DMG400007309	11921.5	1052.91	3.5011	1.5163e-36	1.6819e-34
PGSC0003DMG400010892	280.934	1.58192	7.4724	2.1171e-36	2.3304e-34
PGSC0003DMG400017349	624.885	27.4181	4.5104	2.5217e-36	2.7651e-34
PGSC0003DMG400002921	1227.85	84.4104	3.8626	3.5114e-36	3.7927e-34
PGSC0003DMG400016247	1502.43	110.335	3.7673	3.8291e-36	4.1204e-34
PGSC0003DMG400028177	21413.6	2181.23	3.2953	3.9939e-36	4.2659e-34
PGSC0003DMG400001865	578.436	22.8185	4.6639	4.3167e-36	4.5937e-34
Novel01985	496.113	13.3672	5.2139	5.0554e-36	5.36e-34
PGSC0003DMG400029262	2001.93	164.809	3.6025	1.0152e-35	1.0607e-33
PGSC0003DMG401023851	1824.04	148.807	3.6156	1.2165e-35	1.262e-33
PGSC0003DMG400008144	1915.28	158.151	3.5982	1.633e-35	1.6819e-33
PGSC0003DMG400017301	1379.68	62.7163	4.4593	2.1681e-35	2.2172e-33
PGSC0003DMG401030469	25719	2742.6	3.2292	2.2963e-35	2.3318e-33
PGSC0003DMG401027394	4955.49	222.961	4.4742	2.6409e-35	2.6723e-33
PGSC0003DMG400029237	1974.35	167.669	3.5577	3.1326e-35	3.1478e-33
PGSC0003DMG400020441	1048.34	71.4568	3.8749	3.5659e-35	3.5708e-33
PGSC0003DMG402024469	325.642	1.07766	8.2392	3.6851e-35	3.6774e-33
PGSC0003DMG400004660	2088.39	30.0848	6.1172	3.7582e-35	3.7373e-33
PGSC0003DMG400021542	861.225	38.4579	4.485	7.3065e-35	7.167e-33
PGSC0003DMG400014617	884.808	54.4754	4.0217	1.0129e-34	9.8355e-33
PGSC0003DMG400019110	71787.2	511.254	7.1335	1.4846e-34	1.4367e-32
PGSC0003DMG400011721	3659.07	345.636	3.4041	1.555e-34	1.4948e-32
PGSC0003DMG401016617	852.827	24.0313	5.1493	1.7555e-34	1.682e-32
PGSC0003DMG400023390	810.908	46.3314	4.1295	2.045e-34	1.9529e-32
PGSC0003DMG400004891	10443	1109.42	3.2347	2.201e-34	2.088e-32
PGSC0003DMG400013855	1787.71	120.396	3.8923	2.2268e-34	2.1055e-32
PGSC0003DMG400004940	1053.83	22.8295	5.5286	2.2511e-34	2.1216e-32
PGSC0003DMG400026671	36588.2	4178.41	3.1304	2.3512e-34	2.2015e-32
PGSC0003DMG400029794	741.378	42.8099	4.1142	2.4417e-34	2.2788e-32
PGSC0003DMG400027200	596.272	5.91345	6.6558	2.5483e-34	2.3706e-32
PGSC0003DMG400006027	2206.09	195.199	3.4985	3.7188e-34	3.4374e-32
PGSC0003DMG400000640	5870.77	476.373	3.6234	5.0801e-34	4.6509e-32
PGSC0003DMG400006890	2242.6	210.311	3.4146	5.7219e-34	5.222e-32
PGSC0003DMG400031812	9048.01	981.118	3.2051	8.333e-34	7.581e-32
PGSC0003DMG400013551	1523.54	129.495	3.5565	1.0435e-33	9.4629e-32
PGSC0003DMG400022639	445.136	15.234	4.8689	1.2735e-33	1.1442e-31
PGSC0003DMG402027394	3466.16	140.318	4.6266	1.3458e-33	1.2053e-31
PGSC0003DMG400021372	4494.92	474.743	3.2431	1.4202e-33	1.2641e-31
PGSC0003DMG400023264	3381.49	348.061	3.2802	1.7422e-33	1.5412e-31
PGSC0003DMG400027240	1680.26	149.312	3.4923	2.2127e-33	1.9337e-31
PGSC0003DMG400030514	649.428	4.3222	7.2313	2.2773e-33	1.9841e-31
PGSC0003DMG400010076	1241.17	74.1355	4.0654	2.471e-33	2.1464e-31
PGSC0003DMG400035573	2334.22	222.099	3.3937	3.2387e-33	2.7964e-31
PGSC0003DMG400011745	785.623	43.6837	4.1687	3.6896e-33	3.1668e-31
PGSC0003DMG400005960	6423.47	131.401	5.6113	4.1518e-33	3.5529e-31
Novel01690	1163.67	53.7052	4.4375	4.2726e-33	3.6347e-31
PGSC0003DMG400013235	28610.5	3351.17	3.0938	6.7552e-33	5.6963e-31
PGSC0003DMG402003479	21382.4	2493.99	3.0999	8.2511e-33	6.9172e-31
PGSC0003DMG400021437	534.848	27.0672	4.3045	8.8531e-33	7.4004e-31
PGSC0003DMG402030469	18548.1	2153.82	3.1063	9.062e-33	7.5531e-31
PGSC0003DMG400032152	1536.09	136.639	3.4908	9.753e-33	8.1057e-31
PGSC0003DMG400007178	28887.3	3460.08	3.0616	1.0059e-32	8.3362e-31
PGSC0003DMG400024029	335.065	8.46983	5.306	1.7432e-32	1.4121e-30
PGSC0003DMG400030440	635.014	36.0195	4.1399	1.8851e-32	1.5186e-30
PGSC0003DMG400000521	1056.23	84.3489	3.6464	2.0652e-32	1.6544e-30
PGSC0003DMG400027520	975.918	76.3227	3.6766	3.2e-32	2.5353e-30
PGSC0003DMG400007849	8505.57	963.121	3.1426	3.2239e-32	2.5472e-30
PGSC0003DMG400005103	1759.41	164.542	3.4186	4.0662e-32	3.1694e-30
PGSC0003DMG400015593	4783.2	546.615	3.1294	4.4598e-32	3.4668e-30
PGSC0003DMG401004716	1250.77	108.155	3.5317	5.5677e-32	4.2933e-30
PGSC0003DMG400006995	1071.62	85.064	3.6551	7.0584e-32	5.3851e-30
PGSC0003DMG400014540	5025.33	480.514	3.3866	7.9079e-32	6.0014e-30
PGSC0003DMG400029074	716.119	45.4393	3.9782	9.029e-32	6.8164e-30
PGSC0003DMG400001570	4398.01	492.784	3.1578	1.3218e-31	9.9015e-30
PGSC0003DMG400009006	260.058	3.3039	6.2985	1.3956e-31	1.0427e-29
PGSC0003DMG400001624	834.89	45.8683	4.186	1.6582e-31	1.2325e-29
PGSC0003DMG400020292	2407.73	246.707	3.2868	1.6942e-31	1.256e-29
PGSC0003DMG400008591	1514.09	87.1911	4.1181	2.053e-31	1.5181e-29
PGSC0003DMG400025400	695.514	17.9828	5.2734	2.1746e-31	1.5957e-29
PGSC0003DMG400030029	464.117	21.498	4.4322	2.3797e-31	1.7374e-29
PGSC0003DMG400023039	205.661	0.827752	7.9569	2.7525e-31	1.9995e-29
PGSC0003DMG400021550	6564.68	781.509	3.0704	3.4073e-31	2.4628e-29
PGSC0003DMG400002658	4139.63	475.699	3.1214	3.8483e-31	2.7676e-29
PGSC0003DMG400023978	15673.8	1580.5	3.3099	6.4002e-31	4.5462e-29
PGSC0003DMG400007019	54978.9	6937.51	2.9864	6.9911e-31	4.9537e-29
PGSC0003DMG400031370	2182.52	234.938	3.2156	7.2647e-31	5.1224e-29
PGSC0003DMG400029492	1167.85	105.185	3.4728	9.3336e-31	6.5333e-29
PGSC0003DMG400023822	831.926	66.6862	3.641	1.144e-30	7.9881e-29
PGSC0003DMG400004682	878.109	68.6282	3.6775	1.4199e-30	9.8909e-29
PGSC0003DMG400024081	2042.39	218.577	3.224	1.6298e-30	1.1298e-28
PGSC0003DMG400001780	371.464	13.5506	4.7768	2.088e-30	1.4372e-28
PGSC0003DMG400002520	320.446	5.61526	5.8346	2.4324e-30	1.6623e-28
PGSC0003DMG400030662	1908.67	194.516	3.2946	2.4452e-30	1.6671e-28
PGSC0003DMG402003705	757.919	55.7719	3.7644	2.7109e-30	1.8395e-28
PGSC0003DMG400003304	485.721	26.095	4.2183	2.7742e-30	1.8781e-28
PGSC0003DMG400021945	435.493	17.0748	4.6727	2.87e-30	1.9338e-28
PGSC0003DMG402001316	4519.81	553.809	3.0288	3.6895e-30	2.4744e-28
PGSC0003DMG400001854	594.249	39.538	3.9098	3.7504e-30	2.5095e-28
PGSC0003DMG400012522	1807.87	186.273	3.2788	4.3467e-30	2.8686e-28
PGSC0003DMG400015667	891.264	73.9116	3.592	4.3754e-30	2.8808e-28
PGSC0003DMG400028137	3378.18	400.905	3.0749	6.8936e-30	4.4575e-28
PGSC0003DMG400006908	348.817	12.4065	4.8133	7.1763e-30	4.6299e-28
PGSC0003DMG400026384	1687.18	158.468	3.4124	7.5004e-30	4.8282e-28
PGSC0003DMG401027116	3775.84	451.37	3.0644	9.921e-30	6.2882e-28
PGSC0003DMG402005942	366.858	14.3877	4.6723	9.9631e-30	6.2951e-28
PGSC0003DMG400015745	25315.3	3367.33	2.9103	1.1231e-29	7.072e-28
PGSC0003DMG400014895	206.707	1.4583	7.1472	1.3994e-29	8.6978e-28
PGSC0003DMG400042005	172.678	0	Inf	1.5335e-29	9.5109e-28
PGSC0003DMG400012997	542.532	35.3992	3.9379	3.6788e-29	2.2382e-27
PGSC0003DMG400012225	1475.36	153.011	3.2694	4.0512e-29	2.4596e-27
PGSC0003DMG400023850	813.746	67.0751	3.6007	4.1231e-29	2.498e-27
PGSC0003DMG400007296	1308.66	137.458	3.251	6.6916e-29	3.9784e-27
PGSC0003DMG400000761	464.73	26.3089	4.1428	8.6095e-29	5.0775e-27
PGSC0003DMG400010999	765.873	61.8954	3.6292	8.9704e-29	5.2795e-27
PGSC0003DMG400021676	4487.7	325.569	3.7849	9.3559e-29	5.484e-27
PGSC0003DMG400022750	24773.6	1724.75	3.8443	1.1147e-28	6.4946e-27
PGSC0003DMG400008093	183.691	0.827752	7.7939	1.4098e-28	8.1808e-27
PGSC0003DMG400002700	205.459	1.90763	6.7509	1.6656e-28	9.6101e-27
PGSC0003DMG400012712	2126.89	250.962	3.0832	2.0645e-28	1.179e-26
PGSC0003DMG400027634	428.662	23.7314	4.175	2.4389e-28	1.39e-26
PGSC0003DMG400014152	15156.6	2171.8	2.803	2.6037e-28	1.4752e-26
PGSC0003DMG400035836	1381.75	147.232	3.2303	2.9569e-28	1.6655e-26
PGSC0003DMG400030715	694.758	56.688	3.6154	3.6969e-28	2.0662e-26
PGSC0003DMG400027674	1479.25	161.536	3.1949	3.97e-28	2.206e-26
PGSC0003DMG400026225	1787.93	203.338	3.1363	4.3953e-28	2.4376e-26
PGSC0003DMG400024588	4391.56	580.926	2.9183	4.8817e-28	2.7022e-26
PGSC0003DMG400027523	1034.27	103.165	3.3256	6.4997e-28	3.584e-26
PGSC0003DMG400010025	795.825	51.0604	3.9622	6.7595e-28	3.706e-26
PGSC0003DMG400031758	28596.6	2549.53	3.4875	7.3985e-28	4.041e-26
PGSC0003DMG400004078	373.063	16.1756	4.5275	8.0176e-28	4.3544e-26
PGSC0003DMG400021866	398.182	21.1156	4.237	8.08e-28	4.3801e-26
Novel02668	623.564	46.7535	3.7374	8.4971e-28	4.5975e-26
PGSC0003DMG400016709	2509.24	315.68	2.9907	8.5143e-28	4.5982e-26
PGSC0003DMG400000405	1478	163.443	3.1768	8.92e-28	4.7993e-26
PGSC0003DMG402007356	321.834	11.7555	4.7749	9.2593e-28	4.9726e-26
PGSC0003DMG400024575	2130.52	134.835	3.9819	1.1553e-27	6.1699e-26
PGSC0003DMG400029620	46774.9	366.82	6.9945	1.2201e-27	6.492e-26
PGSC0003DMG400025560	895.308	85.0019	3.3968	1.286e-27	6.83e-26
PGSC0003DMG400020131	1079.68	77.0382	3.8089	1.5233e-27	8.0607e-26
PGSC0003DMG400002613	8543.78	1210.78	2.8189	1.5795e-27	8.3429e-26
PGSC0003DMG400024754	232.864	4.44803	5.7102	1.6344e-27	8.6167e-26
PGSC0003DMG400004115	276.556	8.1419	5.0861	1.7268e-27	9.0873e-26
PGSC0003DMG400000123	373.516	18.6939	4.3205	1.7645e-27	9.2521e-26
PGSC0003DMG400031047	327.165	12.246	4.7396	1.8484e-27	9.6743e-26
PGSC0003DMG400005404	1231.38	133.517	3.2052	2.122e-27	1.1086e-25
PGSC0003DMG400012910	5968.69	815.39	2.8719	2.4192e-27	1.2593e-25
PGSC0003DMG400029490	1672.58	199.228	3.0696	2.5861e-27	1.3414e-25
PGSC0003DMG400017309	256.544	7.71788	5.0549	3.481e-27	1.7863e-25
PGSC0003DMG400003774	3967.84	542.408	2.8709	3.6915e-27	1.8876e-25
PGSC0003DMG400017161	671.957	57.9035	3.5366	3.9134e-27	1.9975e-25
PGSC0003DMG400012559	7959.72	1133.72	2.8117	4.7473e-27	2.4032e-25
PGSC0003DMG400014854	2470.63	95.2824	4.6965	4.7498e-27	2.4032e-25
PGSC0003DMG400030964	207.613	2.99906	6.1132	6.3347e-27	3.18e-25
PGSC0003DMG400002787	791.629	24.419	5.0187	8.5156e-27	4.2488e-25
PGSC0003DMG400016405	1095.01	33.9431	5.0117	1.089e-26	5.4148e-25
PGSC0003DMG400031145	689.318	57.9263	3.5729	1.2096e-26	5.9835e-25
PGSC0003DMG400018238	2300.09	72.3151	4.9912	1.4509e-26	7.1405e-25
PGSC0003DMG400016996	181.749	1.46052	6.9593	1.8161e-26	8.9074e-25
PGSC0003DMG400026251	575.076	11.95	5.5887	1.8418e-26	9.0182e-25
PGSC0003DMG400027156	9261.2	1379.44	2.7471	2.8661e-26	1.3915e-24
PGSC0003DMG401012679	8960.24	1369.57	2.7098	3.2567e-26	1.5732e-24
PGSC0003DMG400020474	778.139	75.7013	3.3616	3.3076e-26	1.593e-24
PGSC0003DMG400006463	348.599	18.4556	4.2394	3.3087e-26	1.593e-24
Novel00376	334.696	15.4285	4.4392	4.0926e-26	1.9638e-24
PGSC0003DMG400028374	790.309	56.99	3.7936	5.017e-26	2.3915e-24
PGSC0003DMG400028266	1577.21	190.536	3.0492	6.2567e-26	2.9629e-24
PGSC0003DMG400008673	254.51	7.88755	5.012	6.3626e-26	3.008e-24
PGSC0003DMG400026303	503.065	38.2338	3.7178	6.6143e-26	3.1219e-24
PGSC0003DMG400012630	578.933	3.8246	7.2419	6.9695e-26	3.2842e-24
PGSC0003DMG400032181	932.456	100.209	3.218	7.0788e-26	3.3303e-24
PGSC0003DMG400001100	2270.14	299.705	2.9212	7.231e-26	3.3964e-24
PGSC0003DMG400005092	458.296	9.04989	5.6622	7.7543e-26	3.6303e-24
PGSC0003DMG400002066	4793.57	706.81	2.7617	9.042e-26	4.2059e-24
PGSC0003DMG400004440	2420.85	334.788	2.8542	9.4901e-26	4.4072e-24
PGSC0003DMG400005896	1025.68	116.054	3.1437	1.079e-25	4.9946e-24
PGSC0003DMG400003289	4592.71	592.106	2.9554	1.1637e-25	5.3694e-24
PGSC0003DMG400027243	2283.9	303.609	2.9112	1.2001e-25	5.5198e-24
PGSC0003DMG400010728	1689.86	93.2014	4.1804	1.302e-25	5.9695e-24
PGSC0003DMG400027392	5130.51	769.788	2.7366	1.3982e-25	6.3903e-24
PGSC0003DMG400020443	1076.05	121.648	3.145	1.4319e-25	6.5339e-24
PGSC0003DMG400012816	1007.25	114.85	3.1326	1.6957e-25	7.7135e-24
PGSC0003DMG400013406	2677.51	388.846	2.7836	1.7113e-25	7.7718e-24
PGSC0003DMG400005143	1760.18	230.008	2.936	1.8518e-25	8.3837e-24
Novel00325	1341.1	34.7633	5.2697	1.9035e-25	8.5906e-24
PGSC0003DMG400032259	978.626	17.1005	5.8386	2.1477e-25	9.6625e-24
PGSC0003DMG400018119	407.308	10.5862	5.2659	2.1616e-25	9.71e-24
Novel02218	1489.66	48.8443	4.9306	2.2162e-25	9.9244e-24
PGSC0003DMG400033006	416.992	3.42308	6.9286	2.2402e-25	1.0016e-23
PGSC0003DMG400014627	48497.8	7736.25	2.6482	2.3048e-25	1.0289e-23
PGSC0003DMG400012405	1663.67	209.148	2.9918	2.4899e-25	1.1098e-23
PGSC0003DMG400020720	435.135	30.917	3.815	3.2375e-25	1.4342e-23
Novel02902	324.309	15.561	4.3814	3.2599e-25	1.4419e-23
PGSC0003DMG400022208	199.269	3.37037	5.8857	3.6477e-25	1.6109e-23
PGSC0003DMG400022818	389.264	24.8112	3.9717	3.8073e-25	1.6763e-23
PGSC0003DMG400029497	1002.39	114.7	3.1275	3.9862e-25	1.7524e-23
PGSC0003DMG400018670	5370.16	812.089	2.7253	4.1063e-25	1.8025e-23
PGSC0003DMG400017737	2915.39	333.127	3.1295	4.2393e-25	1.858e-23
PGSC0003DMG400009959	11115.3	736.99	3.9148	4.852e-25	2.1105e-23
PGSC0003DMG400018793	175.052	1.97189	6.4721	5.1447e-25	2.2311e-23
PGSC0003DMG400002634	878.15	96.4344	3.1868	6.3933e-25	2.7519e-23
PGSC0003DMG400006896	2841.57	412.608	2.7838	8.1482e-25	3.4761e-23
PGSC0003DMG400026904	1006.72	117.162	3.1031	8.3414e-25	3.5533e-23
PGSC0003DMG400026528	769.343	79.1549	3.2809	8.4196e-25	3.5813e-23
PGSC0003DMG400016452	284.128	12.847	4.467	9.8474e-25	4.1702e-23
PGSC0003DMG400008537	618.503	56.5642	3.4508	1.0219e-24	4.321e-23
PGSC0003DMG400016293	856.3	96.1248	3.1551	1.1907e-24	5.0277e-23
PGSC0003DMG400010828	1975.64	150.311	3.7163	1.2154e-24	5.1242e-23
PGSC0003DMG400009782	829.44	53.229	3.9619	1.3171e-24	5.5453e-23
PGSC0003DMG400012929	248.608	8.19239	4.9234	1.3384e-24	5.6183e-23
PGSC0003DMG400011031	2780.09	28.9747	6.5842	1.4104e-24	5.8947e-23
PGSC0003DMG400030804	682.925	68.6806	3.3138	1.4664e-24	6.1112e-23
PGSC0003DMG400024274	38912.8	3042.45	3.6769	1.71e-24	7.106e-23
PGSC0003DMG400000433	4353.98	675.884	2.6875	1.8425e-24	7.6236e-23
PGSC0003DMG400007159	7227.96	433.804	4.0585	2.1967e-24	9.0629e-23
PGSC0003DMG400025377	4212.14	653.954	2.6873	2.3128e-24	9.5011e-23
PGSC0003DMG400012276	5972.23	940.07	2.6674	2.4923e-24	1.021e-22
PGSC0003DMG400028165	1964.77	287.152	2.7745	2.596e-24	1.0604e-22
PGSC0003DMG400000046	3321.66	168.577	4.3004	2.8266e-24	1.153e-22
PGSC0003DMG400008696	1187.01	149.629	2.9879	2.9116e-24	1.186e-22
PGSC0003DMG400011790	540.537	48.246	3.4859	3.1353e-24	1.2735e-22
Novel00570	586.308	9.36184	5.9687	3.2311e-24	1.3106e-22
PGSC0003DMG400021364	1432.5	117.356	3.6096	3.2959e-24	1.335e-22
Novel02719	2659.37	406.269	2.7106	3.5322e-24	1.4287e-22
PGSC0003DMG400000174	417.341	31.9286	3.7083	3.6653e-24	1.4784e-22
PGSC0003DMG401031759	2839.45	240.138	3.5637	6.685e-24	2.6373e-22
PGSC0003DMG400023708	1509.07	210.712	2.8403	6.7874e-24	2.6741e-22
PGSC0003DMG400026784	542.418	48.3377	3.4882	6.8546e-24	2.6949e-22
PGSC0003DMG400011431	207.768	5.26692	5.3019	6.9219e-24	2.7159e-22
PGSC0003DMG400031731	6971.77	261.047	4.7391	7.216e-24	2.8236e-22
PGSC0003DMG400025098	921.611	112.514	3.0341	7.4199e-24	2.8995e-22
PGSC0003DMG400001856	3783.89	586.561	2.6895	7.4652e-24	2.9132e-22
PGSC0003DMG400025159	808.12	20.2732	5.3169	7.9685e-24	3.1055e-22
PGSC0003DMG401003156	1921.15	274.48	2.8072	8.1407e-24	3.1683e-22
PGSC0003DMG400037250	37797.3	6650.7	2.5067	8.8756e-24	3.4496e-22
PGSC0003DMG401007406	995.008	34.9636	4.8308	9.6497e-24	3.7354e-22
PGSC0003DMG400023555	246.666	8.20837	4.9093	1.1134e-23	4.2926e-22
PGSC0003DMG400026127	904.334	110.761	3.0294	1.1627e-23	4.477e-22
PGSC0003DMG400029401	158.69	1.26553	6.9703	1.1837e-23	4.5515e-22
PGSC0003DMG400027335	603.472	58.8644	3.3578	1.2014e-23	4.6134e-22
PGSC0003DMG400009822	277.601	5.28512	5.7149	1.3458e-23	5.1404e-22
Novel01266	1310.49	172.724	2.9236	1.3563e-23	5.1739e-22
PGSC0003DMG400009823	192.663	4.26016	5.499	1.3919e-23	5.3026e-22
PGSC0003DMG400020391	4735.05	554.508	3.0941	1.4342e-23	5.4495e-22
PGSC0003DMG400004996	526.478	51.0578	3.3662	1.602e-23	6.0709e-22
PGSC0003DMG400030630	4189.4	233.608	4.1646	1.6729e-23	6.3146e-22
PGSC0003DMG400017508	14571.3	2509.69	2.5375	1.6802e-23	6.3339e-22
PGSC0003DMG400008936	841.697	104.083	3.0156	1.7037e-23	6.4143e-22
PGSC0003DMG400016401	565.478	56.8524	3.3142	1.869e-23	6.9909e-22
PGSC0003DMG400010747	442.823	36.6744	3.5939	1.9243e-23	7.1885e-22
PGSC0003DMG400021763	1639.95	78.1634	4.391	1.9333e-23	7.2127e-22
PGSC0003DMG400023391	1300.16	141.278	3.2021	1.9872e-23	7.4041e-22
PGSC0003DMG400012940	2088.38	309.866	2.7527	2.0059e-23	7.4643e-22
Novel02705	7470.62	985.919	2.9217	2.0725e-23	7.7021e-22
PGSC0003DMG400028159	320.002	19.4729	4.0385	2.1925e-23	8.1271e-22
PGSC0003DMG400014095	555.868	54.4002	3.3531	2.237e-23	8.2796e-22
Novel02147	1660.36	243.518	2.7694	2.3687e-23	8.7355e-22
PGSC0003DMG400008551	34368.8	6011.72	2.5153	2.718e-23	9.9852e-22
PGSC0003DMG400017204	206.511	4.75998	5.4391	2.8415e-23	1.0386e-21
PGSC0003DMG402007101	197.675	5.09235	5.2787	2.9145e-23	1.064e-21
PGSC0003DMG400044320	2267.32	346.315	2.7108	2.9708e-23	1.0831e-21
PGSC0003DMG400007137	478.316	41.5433	3.5253	4.7525e-23	1.7042e-21
PGSC0003DMG400031816	1586.92	10.813	7.1973	4.757e-23	1.7042e-21
PGSC0003DMG400018338	2075.95	286.478	2.8573	5.0193e-23	1.7959e-21
PGSC0003DMG400025587	1262.9	31.6559	5.3181	5.866e-23	2.0834e-21
PGSC0003DMG400006713	197.591	1.96967	6.6484	6.2768e-23	2.2265e-21
PGSC0003DMG402023533	327.483	6.79834	5.5901	6.3547e-23	2.2514e-21
PGSC0003DMG400009159	5890.52	1018.62	2.5318	7.092e-23	2.5095e-21
PGSC0003DMG400014843	702.919	81.099	3.1156	7.4968e-23	2.6495e-21
PGSC0003DMG400000728	1822.89	275.42	2.7265	8.7062e-23	3.0732e-21
PGSC0003DMG400023576	1551.06	232.182	2.7399	8.8662e-23	3.1258e-21
PGSC0003DMG402012324	242.467	10.3039	4.5565	9.5804e-23	3.3694e-21
PGSC0003DMG400008724	1265.17	30.3277	5.3826	1.2615e-22	4.399e-21
PGSC0003DMG400026575	746.621	6.4408	6.857	1.4303e-22	4.9638e-21
PGSC0003DMG400011211	1052.59	144.123	2.8686	1.5091e-22	5.2309e-21
Novel02018	192.003	5.15882	5.2179	1.9143e-22	6.5879e-21
PGSC0003DMG400005791	1265.43	174.758	2.8562	2.0188e-22	6.9226e-21
PGSC0003DMG400016162	374.769	28.8604	3.6988	2.9541e-22	1.0058e-20
PGSC0003DMG402023951	2423.83	87.9813	4.784	3.2108e-22	1.0881e-20
PGSC0003DMG400000432	62013.2	2747.66	4.4963	3.4121e-22	1.1549e-20
PGSC0003DMG401004033	610.859	68.3114	3.1606	3.5996e-22	1.2141e-20
PGSC0003DMG402015792	7176.81	1288.07	2.4781	4.1135e-22	1.381e-20
Novel02988	1512.78	233.018	2.6987	4.1636e-22	1.3962e-20
PGSC0003DMG400000890	589.054	64.5732	3.1894	4.1978e-22	1.406e-20
PGSC0003DMG400007018	1452.7	223.734	2.6989	4.3071e-22	1.4393e-20
PGSC0003DMG400001247	3931.99	427.046	3.2028	4.4596e-22	1.4868e-20
Novel03230	414.97	36.1839	3.5196	4.6902e-22	1.5601e-20
PGSC0003DMG400013933	1310.93	189.844	2.7877	5.0498e-22	1.6778e-20
PGSC0003DMG400000984	269.635	3.3615	6.3258	5.5082e-22	1.8217e-20
Novel03564	719.824	66.21	3.4425	5.5346e-22	1.8283e-20
PGSC0003DMG400001549	10462.2	1787.15	2.5495	5.6708e-22	1.869e-20
PGSC0003DMG400013928	327.266	17.0478	4.2628	5.7921e-22	1.9068e-20
PGSC0003DMG400026494	390.957	33.3909	3.5495	6.1651e-22	2.0273e-20
PGSC0003DMG400010315	2019.39	324.943	2.6357	6.718e-22	2.2041e-20
PGSC0003DMG400022911	1736.85	268.916	2.6912	6.7825e-22	2.2177e-20
PGSC0003DMG400011322	339.759	24.8728	3.7719	7.303e-22	2.3825e-20
PGSC0003DMG400018637	705.517	84.6753	3.0587	7.6864e-22	2.4991e-20
PGSC0003DMG400021116	469.211	13.081	5.1647	7.7893e-22	2.5297e-20
Novel03491	792.81	103.029	2.9439	8.5357e-22	2.7628e-20
PGSC0003DMG400005419	715.331	84.922	3.0744	1.0384e-21	3.3459e-20
PGSC0003DMG400018548	1703.81	105.695	4.0108	1.0694e-21	3.442e-20
PGSC0003DMG400015565	2950.07	489.909	2.5902	1.1019e-21	3.531e-20
PGSC0003DMG402028027	22524.1	4187.2	2.4274	1.1825e-21	3.7806e-20
Novel01387	30765.3	5783.63	2.4113	1.2127e-21	3.8646e-20
PGSC0003DMG400026320	422.59	38.2293	3.4665	1.3541e-21	4.2961e-20
PGSC0003DMG400015622	800.227	105.329	2.9255	1.3625e-21	4.3151e-20
PGSC0003DMG400014378	1743.33	279.257	2.6422	1.4445e-21	4.5628e-20
PGSC0003DMG400010809	16183	1108.65	3.8676	1.4745e-21	4.6473e-20
PGSC0003DMG400004924	607.167	71.368	3.0887	1.658e-21	5.203e-20
PGSC0003DMG400000456	1492.95	234.571	2.6701	1.8157e-21	5.6853e-20
PGSC0003DMG401022117	383.904	18.0267	4.4125	1.959e-21	6.1142e-20
PGSC0003DMG400030170	3133.75	532.098	2.5581	2.0011e-21	6.2389e-20
PGSC0003DMG400030400	552.494	59.7537	3.2089	2.0979e-21	6.5336e-20
PGSC0003DMG400017212	1165.86	170.225	2.7759	2.3656e-21	7.3434e-20
PGSC0003DMG400017376	9513.48	1760.82	2.4337	2.5843e-21	7.9879e-20
PGSC0003DMG400011203	310.869	22.9772	3.758	2.6439e-21	8.1548e-20
PGSC0003DMG400022808	399.885	36.1497	3.4675	2.6477e-21	8.1578e-20
PGSC0003DMG400026391	133.76	1.27487	6.7132	3.5616e-21	1.0778e-19
PGSC0003DMG400030399	1818.51	292.733	2.6351	3.6802e-21	1.1102e-19
PGSC0003DMG400007073	2064.56	39.5418	5.7063	3.6932e-21	1.1129e-19
PGSC0003DMG400039263	258.136	13.7088	4.235	3.7169e-21	1.1189e-19
PGSC0003DMG400030402	1283.86	183.758	2.8046	3.9554e-21	1.187e-19
PGSC0003DMG400021394	572.944	10.9761	5.706	3.9871e-21	1.1953e-19
PGSC0003DMG400004274	6656.53	833.558	2.9974	4.1516e-21	1.2433e-19
PGSC0003DMG400025246	1357.87	7.3784	7.5238	4.688e-21	1.4009e-19
PGSC0003DMG400014390	347.352	28.092	3.6282	4.7184e-21	1.4072e-19
PGSC0003DMG400029412	727.446	97.0785	2.9056	4.8261e-21	1.4363e-19
PGSC0003DMG400015670	2405.83	426.376	2.4963	5.2626e-21	1.563e-19
PGSC0003DMG400024622	436.331	42.7784	3.3505	5.5999e-21	1.6564e-19
PGSC0003DMG400025882	1340.97	69.1893	4.2766	5.7604e-21	1.7021e-19
PGSC0003DMG400003916	811.772	114.366	2.8274	5.8359e-21	1.7226e-19
PGSC0003DMG400027393	1504.64	243.26	2.6288	5.9732e-21	1.7614e-19
PGSC0003DMG400027129	1326.61	203.936	2.7016	6.8812e-21	2.0147e-19
PGSC0003DMG400017842	2817.31	38.5453	6.1916	7.0423e-21	2.0556e-19
PGSC0003DMG400025833	1204.01	182.217	2.7241	7.4041e-21	2.1568e-19
PGSC0003DMG400009219	2061.03	356.154	2.5328	7.4332e-21	2.1631e-19
PGSC0003DMG400000608	608.97	73.8095	3.0445	8.0311e-21	2.3231e-19
PGSC0003DMG400013177	156.75	3.51043	5.4807	8.2392e-21	2.3761e-19
PGSC0003DMG400012432	255.597	15.7158	4.0236	8.259e-21	2.3794e-19
PGSC0003DMG400016441	1710.85	80.2905	4.4133	8.4634e-21	2.4359e-19
PGSC0003DMG400003958	658.063	83.9616	2.9704	9.0815e-21	2.6086e-19
PGSC0003DMG400024159	117.367	0.38064	8.2684	1.0803e-20	3.0876e-19
PGSC0003DMG400000321	1495.1	248.478	2.589	1.149e-20	3.2711e-19
PGSC0003DMG400007088	1986.46	340.243	2.5456	1.1817e-20	3.3609e-19
PGSC0003DMG400011538	2901.56	380.068	2.9325	1.2171e-20	3.4582e-19
PGSC0003DMG400025579	945.148	138.078	2.7751	1.2244e-20	3.4755e-19
PGSC0003DMG400007359	2658.32	478.87	2.4728	1.249e-20	3.5417e-19
PGSC0003DMG402012862	1413.78	227.831	2.6335	1.3004e-20	3.6841e-19
PGSC0003DMG400013285	2039.19	350.633	2.54	1.361e-20	3.8518e-19
PGSC0003DMG400014125	203.943	8.64662	4.5599	1.4358e-20	4.0557e-19
PGSC0003DMG400029837	841.374	117.43	2.8409	1.4824e-20	4.183e-19
PGSC0003DMG400026536	6158.78	719.068	3.0984	1.5525e-20	4.3682e-19
PGSC0003DMG400026253	1859.72	316.557	2.5546	1.5909e-20	4.4675e-19
PGSC0003DMG402010623	2825.11	121.033	4.5448	1.6716e-20	4.6893e-19
PGSC0003DMG400014777	156.364	3.76256	5.3771	1.6968e-20	4.7554e-19
PGSC0003DMG400000639	877.59	124.98	2.8118	1.7007e-20	4.7618e-19
Novel00509	461.494	49.267	3.2276	1.7343e-20	4.8512e-19
PGSC0003DMG400000781	139.679	1.90763	6.1942	1.8266e-20	5.0895e-19
PGSC0003DMG400009460	1853.08	314.729	2.5577	1.8788e-20	5.2249e-19
PGSC0003DMG400002690	188.06	7.19718	4.7076	1.9375e-20	5.3778e-19
PGSC0003DMG400003537	16519.6	2347.91	2.8147	2.0122e-20	5.5799e-19
PGSC0003DMG400015489	2118.17	356.745	2.5699	2.1738e-20	5.999e-19
PGSC0003DMG400020601	3352.26	599.833	2.4825	2.1924e-20	6.0447e-19
PGSC0003DMG400008404	1167.48	189.378	2.6241	2.2195e-20	6.1077e-19
PGSC0003DMG400022026	211.109	8.16883	4.6917	2.4196e-20	6.6266e-19
Novel01689	1777.6	91.0638	4.2869	2.4446e-20	6.6889e-19
PGSC0003DMG400029022	1522.71	255.591	2.5747	2.5596e-20	6.9903e-19
PGSC0003DMG400015405	750.39	102.338	2.8743	3.0691e-20	8.3343e-19
PGSC0003DMG400030840	949.951	111.478	3.0911	3.2563e-20	8.826e-19
PGSC0003DMG401023991	356.159	32.572	3.4508	3.5386e-20	9.5731e-19
Novel01261	805.247	111.546	2.8518	3.5807e-20	9.6689e-19
PGSC0003DMG400033099	356.287	32.2862	3.464	4.4574e-20	1.1969e-18
PGSC0003DMG400025239	493.175	55.737	3.1454	4.5354e-20	1.2167e-18
PGSC0003DMG402023713	134.645	0.316384	8.7333	5.0167e-20	1.3421e-18
PGSC0003DMG400013273	6757.31	1299.73	2.3782	5.2546e-20	1.4044e-18
PGSC0003DMG400014770	373.946	28.6354	3.707	5.5262e-20	1.4734e-18
PGSC0003DMG400002387	3599.05	155.99	4.5281	5.7387e-20	1.5281e-18
PGSC0003DMG400016553	2113.14	376.008	2.4906	5.9756e-20	1.5898e-18
PGSC0003DMG400017100	1098.37	47.5808	4.5288	6.2756e-20	1.6665e-18
PGSC0003DMG400016849	498.083	59.4686	3.0662	6.4594e-20	1.7137e-18
PGSC0003DMG400020364	320.126	26.5739	3.5906	7.2133e-20	1.9032e-18
PGSC0003DMG400011036	514.775	62.001	3.0536	7.458e-20	1.9624e-18
PGSC0003DMG402020908	2859.11	234.336	3.6089	8.5422e-20	2.2314e-18
PGSC0003DMG400013816	304.839	1.14192	8.0604	9.1996e-20	2.401e-18
PGSC0003DMG400028830	118.305	0.894225	7.0477	9.35e-20	2.438e-18
PGSC0003DMG401029032	293.341	23.6786	3.6309	9.3624e-20	2.439e-18
PGSC0003DMG400021128	2055.81	386.212	2.4122	9.6523e-20	2.5123e-18
PGSC0003DMG400027149	1089.99	181.251	2.5883	9.8914e-20	2.5699e-18
PGSC0003DMG400015276	259.651	18.1569	3.838	9.9156e-20	2.5739e-18
PGSC0003DMG400020618	718.367	94.8979	2.9203	1.0069e-19	2.6091e-18
PGSC0003DMG400019350	639.02	84.1178	2.9254	1.0608e-19	2.7387e-18
PGSC0003DMG400016921	3094.55	582.401	2.4096	1.0743e-19	2.7661e-18
PGSC0003DMG400003422	740.252	25.8661	4.8389	1.1163e-19	2.8616e-18
PGSC0003DMG400003702	211.66	11.3404	4.2222	1.139e-19	2.9145e-18
PGSC0003DMG400023697	239.027	15.4609	3.9505	1.1919e-19	3.0472e-18
PGSC0003DMG400026281	2569.32	489.441	2.3922	1.2044e-19	3.0765e-18
PGSC0003DMG400008831	1676.28	298.254	2.4907	1.2084e-19	3.0812e-18
PGSC0003DMG400001455	294.497	5.34937	5.7827	1.2574e-19	3.1949e-18
PGSC0003DMG400012151	241.333	14.876	4.02	1.3507e-19	3.429e-18
PGSC0003DMG400020321	2377.23	218.402	3.4442	1.3756e-19	3.4891e-18
PGSC0003DMG400004509	175.892	6.68849	4.7169	1.4613e-19	3.7e-18
Novel02732	2787.58	135.181	4.366	1.4777e-19	3.7382e-18
PGSC0003DMG400017561	234.122	15.048	3.9596	1.4855e-19	3.7546e-18
PGSC0003DMG400021427	1725.93	200.175	3.108	1.5707e-19	3.9562e-18
PGSC0003DMG400017254	257.537	17.8019	3.8547	1.5743e-19	3.9604e-18
PGSC0003DMG400000851	1033.22	57.8372	4.159	1.6831e-19	4.2207e-18
PGSC0003DMG400030941	1223.26	47.4732	4.6875	1.7671e-19	4.4238e-18
PGSC0003DMG401008565	241.469	13.7566	4.1336	1.8167e-19	4.5284e-18
PGSC0003DMG400022851	1924.55	239.144	3.0086	1.8358e-19	4.5719e-18
PGSC0003DMG400015199	147.924	3.23964	5.5129	1.8617e-19	4.6325e-18
PGSC0003DMG400035976	2331.9	441.178	2.4021	1.944e-19	4.833e-18
PGSC0003DMG400022815	232.725	15.3511	3.9222	2.1059e-19	5.2176e-18
PGSC0003DMG400015169	423.874	22.982	4.2051	2.1089e-19	5.2204e-18
PGSC0003DMG401021929	370.333	36.9221	3.3263	2.113e-19	5.2262e-18
PGSC0003DMG400016395	5734.44	1127.57	2.3464	2.1758e-19	5.3769e-18
PGSC0003DMG400015595	3659.75	434.692	3.0737	2.4595e-19	6.0469e-18
PGSC0003DMG400024300	1304.16	219.068	2.5737	2.5261e-19	6.2044e-18
PGSC0003DMG401012862	1008.12	157.516	2.6781	2.5388e-19	6.226e-18
PGSC0003DMG400029164	920.91	145.556	2.6615	2.5803e-19	6.3223e-18
PGSC0003DMG400017298	188.263	9.06143	4.3769	2.7989e-19	6.8347e-18
PGSC0003DMG400003756	7832.52	1576.55	2.3127	2.8247e-19	6.8918e-18
PGSC0003DMG400022260	3246.05	624.651	2.3776	3.0349e-19	7.3734e-18
PGSC0003DMG402018816	287.713	24.2365	3.5694	3.0821e-19	7.463e-18
PGSC0003DMG400006214	11803.6	613.529	4.2659	3.1507e-19	7.6228e-18
PGSC0003DMG400014240	189.019	8.46271	4.4813	3.3452e-19	8.0798e-18
PGSC0003DMG400020225	1400.16	129.818	3.431	3.3603e-19	8.1094e-18
PGSC0003DMG400005436	818.649	64.6446	3.6626	3.5723e-19	8.5995e-18
PGSC0003DMG400012142	205.443	11.7326	4.1301	3.6185e-19	8.7035e-18
PGSC0003DMG400025628	833.598	34.9046	4.5779	3.7461e-19	8.9878e-18
PGSC0003DMG400012813	444.459	50.9814	3.124	3.7766e-19	9.0535e-18
PGSC0003DMG400032242	880.945	138.773	2.6663	3.7985e-19	9.0983e-18
PGSC0003DMG400020553	2531.75	479.444	2.4007	3.9658e-19	9.4756e-18
PGSC0003DMG400027591	1637.83	115.035	3.8316	4.0356e-19	9.6342e-18
PGSC0003DMG400011255	359.429	38.9997	3.2042	4.5033e-19	1.068e-17
PGSC0003DMG400031811	358.702	37.344	3.2638	5.5819e-19	1.3184e-17
PGSC0003DMG400018150	4153.39	853.278	2.2832	6.0021e-19	1.4165e-17
PGSC0003DMG401023118	208.361	10.5289	4.3066	6.0085e-19	1.4168e-17
PGSC0003DMG400027168	3116.33	50.3032	5.9531	6.1597e-19	1.4513e-17
PGSC0003DMG400003949	220.229	12.3834	4.1525	6.2899e-19	1.4796e-17
PGSC0003DMG400031015	281.804	24.2587	3.5381	6.3206e-19	1.4856e-17
PGSC0003DMG400000794	14765.4	174.264	6.4048	6.4268e-19	1.5081e-17
PGSC0003DMG400022221	626.905	76.4282	3.0361	6.7071e-19	1.57e-17
PGSC0003DMG400026472	396.328	45.7816	3.1139	7.0431e-19	1.6473e-17
PGSC0003DMG400023133	593.01	81.1303	2.8697	7.1239e-19	1.6649e-17
PGSC0003DMG400015162	2325.13	449.188	2.3719	7.2389e-19	1.6904e-17
PGSC0003DMG400004328	498.525	63.255	2.9784	7.8709e-19	1.8306e-17
PGSC0003DMG400011030	268.86	7.0598	5.2511	7.8897e-19	1.8334e-17
PGSC0003DMG400015548	157.932	1.77469	6.4756	7.9485e-19	1.8456e-17
Novel03289	106.583	0	Inf	8.1217e-19	1.8843e-17
Novel01463	468.715	60.6678	2.9497	8.6258e-19	1.9949e-17
PGSC0003DMG400024232	3482.93	678.549	2.3598	9.2244e-19	2.1316e-17
PGSC0003DMG400003707	33481.1	7151.75	2.227	9.3363e-19	2.1557e-17
PGSC0003DMG400028931	2101.05	403.099	2.3819	9.6349e-19	2.2211e-17
PGSC0003DMG400022151	326.111	29.9948	3.4426	1.0406e-18	2.3951e-17
Novel00783	674.705	99.1977	2.7659	1.0558e-18	2.4281e-17
PGSC0003DMG400000936	1048.36	182.89	2.5191	1.0672e-18	2.4524e-17
PGSC0003DMG400032233	179.899	6.74074	4.7381	1.1148e-18	2.5597e-17
PGSC0003DMG400015918	125.221	1.71265	6.1921	1.1384e-18	2.6097e-17
PGSC0003DMG400006176	826.272	124.818	2.7268	1.1509e-18	2.6362e-17
PGSC0003DMG400016891	329.396	22.2984	3.8848	1.1855e-18	2.7113e-17
PGSC0003DMG400001395	2024.04	342.391	2.5635	1.2063e-18	2.7566e-17
PGSC0003DMG400002123	1433.21	119.892	3.5794	1.2392e-18	2.8274e-17
PGSC0003DMG400024741	137.114	3.1825	5.4291	1.3596e-18	3.0922e-17
PGSC0003DMG400004317	243.144	16.3178	3.8973	1.4003e-18	3.1824e-17
PGSC0003DMG400014157	338.131	19.9457	4.0834	1.462e-18	3.3172e-17
PGSC0003DMG400020361	1204.15	217.536	2.4687	1.474e-18	3.342e-17
PGSC0003DMG400025217	676.178	101.516	2.7357	1.5068e-18	3.4082e-17
PGSC0003DMG400001108	849.735	137.228	2.6304	1.531e-18	3.4575e-17
PGSC0003DMG400017343	904.287	148.629	2.6051	1.5507e-18	3.4965e-17
PGSC0003DMG400010088	167.364	6.21829	4.7503	1.5905e-18	3.5779e-17
PGSC0003DMG400028096	190.274	9.40347	4.3387	1.6758e-18	3.7581e-17
PGSC0003DMG400029730	164.71	5.97281	4.7854	1.6918e-18	3.7909e-17
PGSC0003DMG400028620	5886.47	578.558	3.3469	1.7059e-18	3.8195e-17
PGSC0003DMG400021265	169.622	6.41281	4.7252	1.873e-18	4.184e-17
PGSC0003DMG400010665	2153.56	214.866	3.3252	1.9015e-18	4.2443e-17
PGSC0003DMG400025121	9649.26	2047.71	2.2364	1.9157e-18	4.2727e-17
PGSC0003DMG402017902	486.51	61.4961	2.9839	1.9172e-18	4.2728e-17
PGSC0003DMG400007171	95.3628	0	Inf	1.926e-18	4.2891e-17
PGSC0003DMG400017976	2014.38	170.031	3.5665	1.9775e-18	4.397e-17
PGSC0003DMG400007552	336.52	31.8217	3.4026	2.1415e-18	4.7362e-17
PGSC0003DMG400030401	1052.49	163.843	2.6834	2.2192e-18	4.9042e-17
PGSC0003DMG402026272	1858.51	362.756	2.3571	2.2737e-18	5.0209e-17
PGSC0003DMG400011929	2220.6	74.6871	4.8939	2.4096e-18	5.3068e-17
PGSC0003DMG400030503	2631.76	141.549	4.2167	2.4106e-18	5.3068e-17
PGSC0003DMG400024186	2137.36	105.094	4.3461	2.5153e-18	5.5246e-17
PGSC0003DMG400018546	1619.09	306.786	2.3999	2.5333e-18	5.5601e-17
PGSC0003DMG400015607	1167.54	59.0694	4.3049	2.5673e-18	5.626e-17
PGSC0003DMG400010656	898.351	143.286	2.6484	2.5836e-18	5.6574e-17
PGSC0003DMG400014660	620.816	90.9326	2.7713	2.791e-18	6.0977e-17
PGSC0003DMG400029493	319.034	30.858	3.37	2.8569e-18	6.2323e-17
PGSC0003DMG400028238	2892.37	264.36	3.4517	2.9726e-18	6.4748e-17
PGSC0003DMG400001228	2786.41	570.262	2.2887	3.1663e-18	6.8864e-17
PGSC0003DMG402023991	290.248	25.4647	3.5107	3.2015e-18	6.9576e-17
PGSC0003DMG400002697	408.956	29.467	3.7948	3.2253e-18	7.004e-17
PGSC0003DMG400018618	4075.47	852.23	2.2577	3.2761e-18	7.1091e-17
PGSC0003DMG400001630	52518.7	11500.3	2.1912	3.3461e-18	7.2556e-17
PGSC0003DMG402031322	273.656	23.7725	3.525	3.6662e-18	7.9257e-17
PGSC0003DMG400020219	196.084	10.4829	4.2254	3.708e-18	8.004e-17
PGSC0003DMG400032788	468.508	63.8777	2.8747	3.9875e-18	8.5881e-17
PGSC0003DMG401019736	1533.95	285.462	2.4259	4.1046e-18	8.8271e-17
PGSC0003DMG400014771	438.92	43.1554	3.3463	4.1771e-18	8.9697e-17
PGSC0003DMG400012760	299.435	27.5851	3.4403	4.2037e-18	9.0201e-17
PGSC0003DMG400031457	742.855	113.432	2.7113	4.2543e-18	9.1151e-17
PGSC0003DMG400023598	331.454	35.4834	3.2236	4.4445e-18	9.5096e-17
PGSC0003DMG400016883	2010.02	391.578	2.3598	4.445e-18	9.5096e-17
PGSC0003DMG400024511	208.557	13.088	3.9941	4.4801e-18	9.5706e-17
PGSC0003DMG400028127	81410.5	18375.3	2.1474	4.5444e-18	9.7006e-17
PGSC0003DMG400000090	2218.46	446.236	2.3137	4.6328e-18	9.8674e-17
PGSC0003DMG400033698	287.876	25.6092	3.4907	4.7465e-18	1.0102e-16
PGSC0003DMG400027372	356.253	18.5034	4.267	4.7701e-18	1.0145e-16
PGSC0003DMG400033590	5493.06	130.974	5.3903	4.8119e-18	1.0226e-16
PGSC0003DMG400026290	752.426	124.478	2.5957	4.9012e-18	1.0401e-16
PGSC0003DMG400009536	746.963	66.0326	3.4998	5.5395e-18	1.1721e-16
PGSC0003DMG402027395	759.23	124.26	2.6112	5.8565e-18	1.2364e-16
PGSC0003DMG400011266	4747.74	148.725	4.9965	5.9496e-18	1.2552e-16
PGSC0003DMG400022888	4387.58	948.165	2.2102	6.0349e-18	1.2722e-16
PGSC0003DMG400001077	484.663	64.0069	2.9207	6.0441e-18	1.2732e-16
PGSC0003DMG400002852	656.715	100.543	2.7074	6.2506e-18	1.3146e-16
PGSC0003DMG400019446	2916.81	609.143	2.2595	6.2587e-18	1.3146e-16
PGSC0003DMG400008723	5713.58	1206.39	2.2437	6.3264e-18	1.3269e-16
PGSC0003DMG400003067	954.29	166.622	2.5178	6.3339e-18	1.3275e-16
PGSC0003DMG400006880	152.418	4.94564	4.9457	6.6312e-18	1.3848e-16
Novel00339	92.5347	0	Inf	7.1459e-18	1.4879e-16
PGSC0003DMG400029348	110.35	1.21061	6.5102	7.2218e-18	1.5027e-16
PGSC0003DMG400027945	247.6	19.4343	3.6713	7.6543e-18	1.5904e-16
PGSC0003DMG400007665	806.754	134.994	2.5792	7.9385e-18	1.647e-16
PGSC0003DMG400000488	1483.4	223.756	2.7289	8.1745e-18	1.6923e-16
PGSC0003DMG401018646	367.151	34.1935	3.4246	8.4938e-18	1.7534e-16
PGSC0003DMG400012659	126.546	2.35031	5.7507	8.9265e-18	1.8388e-16
PGSC0003DMG400014936	272.622	23.1029	3.5608	9.1803e-18	1.887e-16
PGSC0003DMG400014394	488.422	67.0672	2.8644	9.2234e-18	1.8932e-16
PGSC0003DMG400020630	10473.5	1786.68	2.5514	9.9682e-18	2.0432e-16
PGSC0003DMG402016309	443.35	6.43368	6.1067	1.0231e-17	2.0925e-16
PGSC0003DMG400003369	834.804	137.923	2.5976	1.1087e-17	2.2613e-16
PGSC0003DMG400015641	1528.87	297.917	2.3595	1.2253e-17	2.4955e-16
PGSC0003DMG400012564	1189.77	224.208	2.4078	1.2422e-17	2.5264e-16
PGSC0003DMG400006396	3467.57	747.25	2.2143	1.2753e-17	2.5883e-16
PGSC0003DMG401010218	305.582	31.5724	3.2748	1.299e-17	2.6326e-16
PGSC0003DMG400023578	207.513	14.5805	3.8311	1.4166e-17	2.8605e-16
PGSC0003DMG400013271	37641.6	4480.14	3.0707	1.4182e-17	2.8605e-16
PGSC0003DMG400025137	6201.43	1372.22	2.1761	1.4184e-17	2.8605e-16
PGSC0003DMG400003155	6879.43	280.129	4.6181	1.4745e-17	2.9716e-16
PGSC0003DMG400028107	798.054	131.911	2.5969	1.48e-17	2.9805e-16
PGSC0003DMG400015364	4083.99	901.91	2.1789	1.4845e-17	2.9876e-16
PGSC0003DMG400007341	286.235	26.1197	3.454	1.5482e-17	3.1092e-16
PGSC0003DMG400029016	5003.63	1111.08	2.171	1.6443e-17	3.2977e-16
PGSC0003DMG400019315	8274.32	1887.25	2.1324	1.7417e-17	3.4881e-16
PGSC0003DMG400027766	1777.69	356.385	2.3185	1.8119e-17	3.6236e-16
PGSC0003DMG402014186	242.424	19.8447	3.6107	1.8379e-17	3.6731e-16
PGSC0003DMG400009707	176.428	9.6051	4.1991	1.8428e-17	3.6804e-16
PGSC0003DMG400020514	332.649	38.2547	3.1203	1.8452e-17	3.6826e-16
PGSC0003DMG400031778	2365.26	477.324	2.309	1.8788e-17	3.747e-16
PGSC0003DMG400006815	302.53	30.1826	3.3253	2.2007e-17	4.3649e-16
PGSC0003DMG400016240	513.428	72.704	2.8201	2.2158e-17	4.3889e-16
PGSC0003DMG400017854	2208.17	467.672	2.2393	2.2537e-17	4.4609e-16
PGSC0003DMG400023321	3350.18	715.592	2.227	2.2581e-17	4.4656e-16
PGSC0003DMG400024876	11524.6	1311.66	3.1353	2.3078e-17	4.5461e-16
PGSC0003DMG400026132	534.047	13.4495	5.3113	2.5343e-17	4.9821e-16
PGSC0003DMG400028739	229.279	17.5405	3.7083	2.551e-17	5.0114e-16
PGSC0003DMG400019432	1426.03	279.192	2.3527	2.5803e-17	5.0621e-16
PGSC0003DMG400027919	12130.1	2800.68	2.1147	2.6659e-17	5.2229e-16
PGSC0003DMG400014303	271.981	24.8453	3.4525	2.7938e-17	5.4587e-16
PGSC0003DMG400015235	133.691	3.94156	5.084	2.9072e-17	5.6688e-16
PGSC0003DMG400027053	1699.91	83.4739	4.348	3.0833e-17	6e-16
PGSC0003DMG400033589	1708.59	44.5895	5.26	3.3165e-17	6.4321e-16
Novel02698	5159.67	1141.4	2.1765	3.3662e-17	6.524e-16
PGSC0003DMG400026154	209.715	13.3946	3.9687	3.6248e-17	7.0064e-16
PGSC0003DMG400016221	1558.02	310.696	2.3261	3.7971e-17	7.3248e-16
PGSC0003DMG400023185	455.702	63.4748	2.8438	4.0835e-17	7.8615e-16
PGSC0003DMG400024664	143.985	3.1825	5.4996	4.1329e-17	7.9512e-16
PGSC0003DMG400018877	1687.26	349.653	2.2707	4.1397e-17	7.959e-16
Novel00629	11354.2	2464.35	2.2039	4.4226e-17	8.4803e-16
PGSC0003DMG400020169	899.762	161.025	2.4823	4.4348e-17	8.498e-16
PGSC0003DMG401012961	1499.36	301.605	2.3136	4.4458e-17	8.5135e-16
PGSC0003DMG401021671	966.555	180.198	2.4233	4.4568e-17	8.5289e-16
PGSC0003DMG400028977	627.729	104.604	2.5852	4.5671e-17	8.7283e-16
PGSC0003DMG401004586	780.392	135.926	2.5214	4.7034e-17	8.959e-16
PGSC0003DMG400006595	94.0178	0.447113	7.7162	4.8277e-17	9.1868e-16
PGSC0003DMG400020622	50999.4	1318.97	5.273	4.8993e-17	9.3138e-16
PGSC0003DMG400005933	246.429	21.697	3.5056	5.0081e-17	9.508e-16
PGSC0003DMG400022421	2766.55	601.84	2.2006	5.5899e-17	1.0578e-15
PGSC0003DMG400007997	1014.13	189.561	2.4195	5.6293e-17	1.0645e-15
PGSC0003DMG400021023	175.508	8.42586	4.3806	5.6344e-17	1.0648e-15
PGSC0003DMG402009791	813.328	146.376	2.4742	5.6727e-17	1.0713e-15
PGSC0003DMG400011585	441.746	61.8911	2.8354	6.1875e-17	1.1648e-15
PGSC0003DMG400011655	14699.1	92.4555	7.3127	6.438e-17	1.2096e-15
PGSC0003DMG400000963	513.938	78.7501	2.7062	6.4384e-17	1.2096e-15
PGSC0003DMG400027602	1858.61	391.188	2.2483	6.4889e-17	1.2183e-15
PGSC0003DMG400029420	217.035	15.5588	3.8021	6.5349e-17	1.2262e-15
Novel01015	346.665	41.1751	3.0737	6.6564e-17	1.2473e-15
Novel02921	581.009	89.1946	2.7035	6.7071e-17	1.2552e-15
PGSC0003DMG400011937	295.331	30.7703	3.2627	7.1285e-17	1.3323e-15
PGSC0003DMG400021708	1683.53	351.087	2.2616	7.366e-17	1.3732e-15
PGSC0003DMG400020101	1622.47	331.228	2.2923	7.4337e-17	1.3849e-15
PGSC0003DMG400000330	1472.77	298.912	2.3007	8.0106e-17	1.4904e-15
PGSC0003DMG400007017	258.244	24.6162	3.3911	8.1009e-17	1.5063e-15
PGSC0003DMG400008852	3610.59	799.74	2.1746	8.425e-17	1.5645e-15
PGSC0003DMG400021563	2576.89	498.399	2.3703	8.8563e-17	1.6404e-15
PGSC0003DMG400000988	2510.48	547.369	2.1974	8.9418e-17	1.6551e-15
PGSC0003DMG400022398	459.309	63.4436	2.8559	9.0508e-17	1.6743e-15
PGSC0003DMG400023680	3190.29	296.606	3.4271	9.3117e-17	1.7214e-15
PGSC0003DMG400000839	1300.17	267.017	2.2837	9.5933e-17	1.7689e-15
PGSC0003DMG400027283	1562.55	122.397	3.6743	1.0095e-16	1.8591e-15
PGSC0003DMG400016235	315.144	35.4062	3.1539	1.0407e-16	1.9141e-15
PGSC0003DMG400030543	1303.3	258.308	2.335	1.0508e-16	1.9315e-15
PGSC0003DMG400001692	722.362	125.774	2.5219	1.0613e-16	1.9483e-15
PGSC0003DMG400013268	745.123	125.005	2.5755	1.064e-16	1.9519e-15
PGSC0003DMG400004340	533.669	14.7294	5.1792	1.0739e-16	1.9688e-15
PGSC0003DMG400035893	1104.45	144.84	2.9308	1.1806e-16	2.1617e-15
PGSC0003DMG400016908	418.908	36.4202	3.5238	1.1999e-16	2.1943e-15
PGSC0003DMG400004800	855.806	157.478	2.4421	1.2255e-16	2.2369e-15
PGSC0003DMG400021628	2393.03	527.943	2.1804	1.3086e-16	2.3841e-15
PGSC0003DMG400012019	924.706	177.206	2.3836	1.3534e-16	2.4641e-15
PGSC0003DMG400030428	185.47	10.657	4.1213	1.3859e-16	2.52e-15
PGSC0003DMG400025117	723.905	72.1855	3.326	1.4513e-16	2.6373e-15
PGSC0003DMG400011752	146453	17119.4	3.0967	1.5056e-16	2.7326e-15
PGSC0003DMG400019202	744.944	131.299	2.5043	1.5153e-16	2.7483e-15
PGSC0003DMG400008585	822.615	29.0492	4.8236	1.5499e-16	2.8094e-15
PGSC0003DMG400023115	4380.35	183.885	4.5742	1.5872e-16	2.8733e-15
PGSC0003DMG400004899	6059.33	1394.9	2.119	1.6083e-16	2.9097e-15
PGSC0003DMG400008878	1378.63	281.055	2.2943	1.6162e-16	2.9223e-15
PGSC0003DMG400021102	992.638	82.2605	3.593	1.6902e-16	3.0484e-15
Novel00298	419.839	24.1368	4.1205	1.7363e-16	3.1277e-15
PGSC0003DMG400006806	161.699	8.1419	4.3118	1.8236e-16	3.2746e-15
PGSC0003DMG400008567	2530.85	550.56	2.2007	1.8438e-16	3.3068e-15
PGSC0003DMG400001419	1980.78	315.389	2.6509	1.8836e-16	3.374e-15
PGSC0003DMG400010408	2718.98	397.312	2.7747	1.9245e-16	3.4452e-15
PGSC0003DMG400000912	2088.79	446.728	2.2252	1.967e-16	3.5168e-15
PGSC0003DMG400016369	1600.36	335.198	2.2553	2.0179e-16	3.6056e-15
PGSC0003DMG400003932	1354.66	86.8538	3.9632	2.0584e-16	3.6734e-15
PGSC0003DMG400022914	96.2427	0	Inf	2.0777e-16	3.7055e-15
PGSC0003DMG400004674	7736.61	1833.54	2.0771	2.1189e-16	3.7744e-15
PGSC0003DMG400021895	776.497	132.679	2.549	2.2173e-16	3.9399e-15
PGSC0003DMG400008568	377.548	52.7793	2.8386	2.2225e-16	3.9442e-15
PGSC0003DMG400025012	3142.66	699.826	2.1669	2.2815e-16	4.0415e-15
PGSC0003DMG402018597	436.555	63.4797	2.7818	2.3422e-16	4.144e-15
PGSC0003DMG400009380	686.58	21.9199	4.9691	2.4216e-16	4.2791e-15
PGSC0003DMG400021710	545.305	81.7077	2.7385	2.5864e-16	4.5565e-15
PGSC0003DMG400033637	846.353	158.031	2.4211	2.5893e-16	4.5589e-15
Novel00400	17044.3	4153.9	2.0368	2.7258e-16	4.7933e-15
PGSC0003DMG401017590	2250.57	492.238	2.1929	2.9064e-16	5.0953e-15
PGSC0003DMG400009862	1179.33	227.988	2.3709	2.9555e-16	5.175e-15
PGSC0003DMG400015793	267.981	27.9157	3.263	2.9987e-16	5.2475e-15
PGSC0003DMG400030824	564.288	28.1267	4.3264	3.0911e-16	5.4026e-15
PGSC0003DMG400027946	358.449	3.49445	6.6806	3.1709e-16	5.5354e-15
PGSC0003DMG400000213	173.52	10.233	4.0838	3.2034e-16	5.5887e-15
PGSC0003DMG400030821	390.511	52.488	2.8953	3.3374e-16	5.812e-15
PGSC0003DMG400018922	303.272	15.4951	4.2907	3.4807e-16	6.047e-15
PGSC0003DMG400019320	3563.06	818.607	2.1219	3.5089e-16	6.0923e-15
PGSC0003DMG400023505	151.085	7.83263	4.2697	3.7281e-16	6.4458e-15
PGSC0003DMG400008358	3241.17	410.264	2.9819	3.8865e-16	6.7155e-15
PGSC0003DMG400010989	208.014	16.8683	3.6243	4.066e-16	7.0215e-15
PGSC0003DMG400010093	1574.65	334.804	2.2336	4.134e-16	7.1305e-15
PGSC0003DMG400025862	695.627	86.9933	2.9993	4.2256e-16	7.2797e-15
PGSC0003DMG400007906	921.144	179.477	2.3596	4.2289e-16	7.2811e-15
PGSC0003DMG400015599	378.068	49.2682	2.9399	4.3382e-16	7.4567e-15
PGSC0003DMG400008642	744.132	138.6	2.4246	4.3387e-16	7.4567e-15
PGSC0003DMG400026107	531.045	81.8339	2.6981	4.445e-16	7.6212e-15
PGSC0003DMG400018275	365.26	48.9777	2.8987	4.6581e-16	7.9677e-15
PGSC0003DMG402020132	2293.04	135.699	4.0788	4.8973e-16	8.3571e-15
PGSC0003DMG400003751	893.811	177.162	2.3349	5.0059e-16	8.5322e-15
PGSC0003DMG400004387	173.589	5.03742	5.1068	5.0155e-16	8.5436e-15
PGSC0003DMG402020339	1956.44	434.16	2.1719	5.0321e-16	8.5668e-15
PGSC0003DMG400019611	455.085	67.1251	2.7612	5.1833e-16	8.819e-15
PGSC0003DMG400016402	100221	24386.8	2.039	5.3816e-16	9.1456e-15
PGSC0003DMG401015433	158.04	8.45385	4.2245	5.4935e-16	9.3301e-15
PGSC0003DMG402031759	2183.64	130.495	4.0647	5.8173e-16	9.8569e-15
PGSC0003DMG400014133	1028.78	116.413	3.1436	5.9021e-16	9.9895e-15
PGSC0003DMG400011811	1858.55	414.305	2.1654	5.9024e-16	9.9895e-15
PGSC0003DMG400028406	98.1207	1.14414	6.4222	6.4495e-16	1.0871e-14
PGSC0003DMG400011771	573.147	89.7031	2.6757	6.489e-16	1.0931e-14
PGSC0003DMG400027077	444.043	42.1003	3.3988	6.963e-16	1.1709e-14
Novel00338	346.953	46.4989	2.8995	7.0608e-16	1.1859e-14
PGSC0003DMG400018522	935.93	175.969	2.4111	7.1206e-16	1.1953e-14
PGSC0003DMG400028350	908.396	171.522	2.4049	7.1671e-16	1.2017e-14
PGSC0003DMG400007020	438.315	26.2597	4.061	7.2359e-16	1.2125e-14
PGSC0003DMG400022820	164.055	8.82469	4.2165	7.4146e-16	1.2396e-14
PGSC0003DMG400001632	7756.17	1916.72	2.0167	7.7552e-16	1.2943e-14
PGSC0003DMG400010578	401.146	39.1812	3.3559	7.8775e-16	1.3132e-14
PGSC0003DMG400032814	186.766	12.3214	3.922	8.0479e-16	1.34e-14
PGSC0003DMG402029354	1000.24	204.909	2.2873	8.1574e-16	1.3567e-14
PGSC0003DMG400005974	461.397	67.0266	2.7832	8.3961e-16	1.394e-14
PGSC0003DMG400025331	1588.32	352.295	2.1727	8.7243e-16	1.446e-14
PGSC0003DMG400020080	700.96	128.917	2.4429	8.99e-16	1.4892e-14
PGSC0003DMG400017096	3201.5	756.777	2.0808	9.1911e-16	1.5216e-14
PGSC0003DMG400000985	638.878	112.767	2.5022	9.2611e-16	1.5323e-14
PGSC0003DMG400016880	870.139	70.551	3.6245	1.0337e-15	1.7064e-14
PGSC0003DMG400009409	141.586	6.74342	4.3921	1.0731e-15	1.7694e-14
PGSC0003DMG400020848	89.0267	0.447113	7.6375	1.0961e-15	1.8064e-14
PGSC0003DMG400014227	90.4842	0.827752	6.7723	1.1004e-15	1.8123e-14
PGSC0003DMG400032250	9916.3	519.98	4.2533	1.1696e-15	1.9197e-14
PGSC0003DMG400026397	283.964	31.7601	3.1604	1.1844e-15	1.9396e-14
PGSC0003DMG400029298	216.133	19.7233	3.4539	1.2087e-15	1.9771e-14
PGSC0003DMG400003890	240.118	14.2844	4.0712	1.2244e-15	2.0017e-14
Novel02523	22053.4	4190.8	2.3957	1.2871e-15	2.1007e-14
PGSC0003DMG400015857	4780.63	1153.18	2.0516	1.3134e-15	2.1412e-14
PGSC0003DMG400028033	569.575	86.6527	2.7166	1.3304e-15	2.1628e-14
PGSC0003DMG400026006	17803.2	3727.55	2.2558	1.3473e-15	2.1877e-14
PGSC0003DMG400003812	329.475	42.2878	2.9619	1.356e-15	2.2007e-14
PGSC0003DMG400028668	3211.74	759.285	2.0806	1.3595e-15	2.2051e-14
PGSC0003DMG400018276	1155.72	211.519	2.4499	1.4666e-15	2.3734e-14
PGSC0003DMG401002659	1995.43	450.228	2.148	1.5352e-15	2.4817e-14
PGSC0003DMG400015606	1047.11	212.346	2.3019	1.6083e-15	2.597e-14
PGSC0003DMG400005975	123.554	4.25794	4.8588	1.6214e-15	2.6138e-14
PGSC0003DMG400010412	406.125	61.4098	2.7254	1.7445e-15	2.8074e-14
PGSC0003DMG400016285	1174.05	244.507	2.2635	1.8333e-15	2.9388e-14
PGSC0003DMG400021927	7233.1	1355.22	2.4161	1.8448e-15	2.954e-14
PGSC0003DMG400021264	5430.55	1333.79	2.0256	1.9133e-15	3.0604e-14
PGSC0003DMG400005106	3291.9	793.751	2.0522	1.9201e-15	3.0694e-14
PGSC0003DMG400005611	7611.09	1955.1	1.9609	1.9589e-15	3.1298e-14
PGSC0003DMG400029489	563.501	88.1658	2.6761	2.069e-15	3.3002e-14
PGSC0003DMG400022318	733.999	139.351	2.3971	2.0872e-15	3.3274e-14
PGSC0003DMG400027769	2923.66	710.711	2.0404	2.2521e-15	3.5779e-14
PGSC0003DMG400024344	24065.7	262.552	6.5182	2.253e-15	3.5779e-14
PGSC0003DMG400007913	541.655	93.3326	2.5369	2.2812e-15	3.6186e-14
PGSC0003DMG400025542	1655.29	369.501	2.1634	2.3377e-15	3.7042e-14
PGSC0003DMG400023357	741.417	143.723	2.367	2.3519e-15	3.7248e-14
PGSC0003DMG400035710	542.358	88.5693	2.6144	2.3733e-15	3.7566e-14
PGSC0003DMG400014712	94.2183	1.34134	6.1343	2.4203e-15	3.8267e-14
PGSC0003DMG400029505	1524.86	243.984	2.6438	2.438e-15	3.8526e-14
PGSC0003DMG400009025	853.192	168.36	2.3413	2.4555e-15	3.8781e-14
PGSC0003DMG400000178	214.835	18.7258	3.5201	2.5198e-15	3.9732e-14
PGSC0003DMG400026339	661.689	120.99	2.4513	2.5858e-15	4.0728e-14
PGSC0003DMG400007807	3292.57	717.814	2.1975	2.6095e-15	4.1078e-14
PGSC0003DMG400027471	1202.85	253.882	2.2442	2.8119e-15	4.4168e-14
PGSC0003DMG400025902	862.377	92.7809	3.2164	2.8568e-15	4.4799e-14
PGSC0003DMG400010466	599.726	109.026	2.4596	2.8688e-15	4.4964e-14
PGSC0003DMG400010229	299.952	37.6723	2.9932	3.0828e-15	4.8239e-14
PGSC0003DMG400022506	1492.89	332.748	2.1656	3.1854e-15	4.9736e-14
PGSC0003DMG400023464	876.266	81.0681	3.4342	3.255e-15	5.0769e-14
PGSC0003DMG400019587	1292.83	270.789	2.2553	3.3927e-15	5.2859e-14
PGSC0003DMG400047044	946.944	196.093	2.2717	3.4422e-15	5.3573e-14
PGSC0003DMG400000129	648.528	123.989	2.387	3.4475e-15	5.3626e-14
PGSC0003DMG400019449	1804.85	410.407	2.1367	3.614e-15	5.6065e-14
PGSC0003DMG400026342	2928.93	485.03	2.5942	3.6212e-15	5.6146e-14
Novel03544	1614.43	358.021	2.1729	3.6848e-15	5.7071e-14
PGSC0003DMG400029948	376.697	56.1961	2.7449	3.69e-15	5.7121e-14
PGSC0003DMG400027675	794.615	123.198	2.6893	3.727e-15	5.76e-14
PGSC0003DMG400011731	313.613	15.4538	4.343	3.9622e-15	6.1072e-14
PGSC0003DMG400028380	5065.85	1219.09	2.055	3.9655e-15	6.109e-14
PGSC0003DMG402012965	139.579	6.47485	4.4301	4.0425e-15	6.2111e-14
Novel00372	396.665	60.2036	2.72	4.0745e-15	6.2536e-14
PGSC0003DMG400027263	2183.08	510.736	2.0957	4.1634e-15	6.3832e-14
PGSC0003DMG400014315	208.666	19.5926	3.4128	4.2818e-15	6.5609e-14
PGSC0003DMG401010423	380.628	55.0939	2.7884	4.4353e-15	6.7856e-14
PGSC0003DMG400014442	144.847	5.07637	4.8346	4.524e-15	6.9104e-14
PGSC0003DMG400003266	311.404	16.0228	4.2806	4.6845e-15	7.1518e-14
PGSC0003DMG400024564	391.581	21.6947	4.1739	4.7306e-15	7.2145e-14
PGSC0003DMG402024041	16073.9	4155.34	1.9517	4.7633e-15	7.2567e-14
PGSC0003DMG402002542	1970.97	456.11	2.1115	5.118e-15	7.7807e-14
PGSC0003DMG400027721	1116.51	238.695	2.2258	5.1781e-15	7.8678e-14
PGSC0003DMG400033054	1923.24	215.963	3.1547	5.3378e-15	8.102e-14
PGSC0003DMG400016551	530.666	91.218	2.5404	5.3685e-15	8.1357e-14
PGSC0003DMG400017753	4604.58	1151.47	1.9996	5.6499e-15	8.5532e-14
PGSC0003DMG400030851	4137.73	1037.37	1.9959	6.2161e-15	9.3856e-14
PGSC0003DMG400025875	339.386	48.7233	2.8002	7.1089e-15	1.0704e-13
PGSC0003DMG400017965	782.51	155.214	2.3338	7.2586e-15	1.0914e-13
PGSC0003DMG400014560	175.649	13.232	3.7306	7.3819e-15	1.1094e-13
PGSC0003DMG400004608	4193.81	1049.65	1.9984	7.4385e-15	1.1173e-13
PGSC0003DMG400009153	2026.27	492.11	2.0418	7.5054e-15	1.1262e-13
PGSC0003DMG400015190	1734.62	410.43	2.0794	7.5706e-15	1.1348e-13
Novel02738	347.568	47.8081	2.862	7.7933e-15	1.1657e-13
PGSC0003DMG400009401	704.871	135.725	2.3767	7.8761e-15	1.1775e-13
PGSC0003DMG400005352	1264.81	169.815	2.8969	8.0058e-15	1.195e-13
PGSC0003DMG401005047	167.633	8.05012	4.3802	8.0171e-15	1.1961e-13
PGSC0003DMG400022555	226.916	22.7981	3.3152	8.03e-15	1.1974e-13
PGSC0003DMG400014250	1361.6	21.9198	5.9569	8.0635e-15	1.2012e-13
PGSC0003DMG400015575	527.089	93.8063	2.4903	8.1848e-15	1.2186e-13
PGSC0003DMG400027363	4120.66	1003.83	2.0374	8.458e-15	1.2586e-13
PGSC0003DMG400001932	15115.9	2435.39	2.6338	8.4999e-15	1.2635e-13
PGSC0003DMG400027364	210.204	18.3469	3.5182	8.6001e-15	1.2778e-13
PGSC0003DMG400018937	953.55	200.5	2.2497	8.795e-15	1.3054e-13
PGSC0003DMG400023689	653.375	127.953	2.3523	8.9693e-15	1.3299e-13
PGSC0003DMG400004318	961.068	206.882	2.2158	9.2065e-15	1.3644e-13
PGSC0003DMG400000864	617.252	116.941	2.4001	9.6971e-15	1.4327e-13
PGSC0003DMG400002462	5112.84	1280.39	1.9975	9.8172e-15	1.4489e-13
PGSC0003DMG400001528	1017.26	24.4355	5.3796	1e-14	1.4744e-13
PGSC0003DMG400014515	912.002	195.909	2.2189	1.0182e-14	1.4989e-13
PGSC0003DMG400004122	1392.67	308.571	2.1742	1.0268e-14	1.5108e-13
PGSC0003DMG400024818	4394.49	1088.57	2.0133	1.0656e-14	1.5663e-13
PGSC0003DMG400031122	775.065	156.935	2.3041	1.0957e-14	1.609e-13
PGSC0003DMG400016523	123.962	5.2071	4.5733	1.1003e-14	1.6148e-13
PGSC0003DMG400010674	2820.57	698.585	2.0135	1.1419e-14	1.6734e-13
PGSC0003DMG400009405	688.628	21.9199	4.9734	1.2183e-14	1.7826e-13
PGSC0003DMG400014292	296.102	37.1582	2.9943	1.23e-14	1.7988e-13
PGSC0003DMG400012241	869.253	183.561	2.2435	1.2445e-14	1.819e-13
PGSC0003DMG400012515	130.819	5.5784	4.5516	1.281e-14	1.8705e-13
PGSC0003DMG400022127	953.588	156.037	2.6115	1.3409e-14	1.9551e-13
PGSC0003DMG400026546	931.997	198.863	2.2286	1.411e-14	2.0541e-13
PGSC0003DMG400011208	2089.5	506.871	2.0435	1.4164e-14	2.061e-13
PGSC0003DMG400033650	269.94	8.3391	5.0166	1.4211e-14	2.0667e-13
PGSC0003DMG400005550	824.412	170.275	2.2755	1.4751e-14	2.142e-13
PGSC0003DMG400026128	3649.23	832.484	2.1321	1.5115e-14	2.1915e-13
PGSC0003DMG400007573	978.218	205.367	2.252	1.5508e-14	2.2452e-13
PGSC0003DMG400013885	2425.85	596.085	2.0249	1.5823e-14	2.2897e-13
PGSC0003DMG401009791	826.197	170.277	2.2786	1.6307e-14	2.3585e-13
PGSC0003DMG400016202	1742.89	337.812	2.3672	1.6847e-14	2.4353e-13
PGSC0003DMG400000487	1706.92	323.448	2.3998	1.9049e-14	2.7413e-13
PGSC0003DMG400026005	623.304	124.31	2.326	1.9182e-14	2.759e-13
PGSC0003DMG400020045	809.822	168.989	2.2607	1.9207e-14	2.7613e-13
PGSC0003DMG400016036	206.644	19.8061	3.3831	1.9475e-14	2.7985e-13
PGSC0003DMG400026571	71.6889	0	Inf	1.9685e-14	2.8257e-13
Novel03401	2110.25	302.678	2.8016	1.9713e-14	2.8284e-13
PGSC0003DMG400009993	1624.63	372.565	2.1246	1.99e-14	2.8538e-13
PGSC0003DMG400033588	281.84	8.63285	5.0289	2.057e-14	2.9454e-13
PGSC0003DMG400021869	540.97	2.53818	7.7356	2.1068e-14	3.0108e-13
PGSC0003DMG400025497	2298.54	567.612	2.0177	2.1438e-14	3.0606e-13
PGSC0003DMG400029087	5622.36	1343.13	2.0656	2.2261e-14	3.1749e-13
PGSC0003DMG400025814	1001.78	65.0741	3.9443	2.2373e-14	3.1894e-13
PGSC0003DMG400033335	1235.37	284.878	2.1165	2.241e-14	3.193e-13
PGSC0003DMG400011619	435.771	0	Inf	2.2449e-14	3.1971e-13
PGSC0003DMG400018957	647.14	129.648	2.3195	2.2954e-14	3.2641e-13
PGSC0003DMG400012550	1074.41	244.012	2.1385	2.422e-14	3.4391e-13
PGSC0003DMG400024617	408.422	67.4881	2.5974	2.4937e-14	3.5361e-13
PGSC0003DMG400029754	122.528	4.95007	4.6295	2.494e-14	3.5361e-13
PGSC0003DMG400027219	218.19	12.4597	4.1302	2.6483e-14	3.7439e-13
PGSC0003DMG400023081	1482.73	342.073	2.1159	2.7332e-14	3.8582e-13
PGSC0003DMG400014869	576.836	109.796	2.3933	2.7527e-14	3.8838e-13
PGSC0003DMG400005246	1649.85	402.513	2.0352	2.7965e-14	3.9437e-13
PGSC0003DMG400003340	109.771	2.22402	5.6252	2.8353e-14	3.9946e-13
PGSC0003DMG400026658	242.53	28.7461	3.0767	2.8809e-14	4.0547e-13
PGSC0003DMG400005667	1251.05	286.136	2.1284	3.0296e-14	4.2536e-13
PGSC0003DMG400012626	166.681	12.5788	3.728	3.0841e-14	4.3217e-13
PGSC0003DMG400016326	141.883	8.39403	4.0792	3.1183e-14	4.3655e-13
Novel01842	94.2352	1.9032	5.6298	3.1524e-14	4.411e-13
PGSC0003DMG400013714	8751.26	2330	1.9092	3.3035e-14	4.6158e-13
PGSC0003DMG400026229	158.025	11.1981	3.8188	3.3217e-14	4.639e-13
PGSC0003DMG400002367	1510.35	334.569	2.1745	3.4775e-14	4.8543e-13
PGSC0003DMG400029931	13838.9	492.226	4.8133	3.5137e-14	4.9024e-13
PGSC0003DMG400009178	5597.74	221.132	4.6619	3.6311e-14	5.0589e-13
PGSC0003DMG400007084	2033.77	497.723	2.0307	3.7003e-14	5.1527e-13
PGSC0003DMG402015686	1459.85	346.629	2.0744	3.8596e-14	5.372e-13
PGSC0003DMG400015499	516.679	92.093	2.4881	3.9272e-14	5.4566e-13
PGSC0003DMG400024095	807.455	171.682	2.2336	3.928e-14	5.4566e-13
PGSC0003DMG400008000	324.374	48.8625	2.7309	4.43e-14	6.1304e-13
PGSC0003DMG400015434	1331.83	294.933	2.175	4.4536e-14	6.1572e-13
PGSC0003DMG400008362	193.223	17.976	3.4261	4.5296e-14	6.2592e-13
PGSC0003DMG400012823	2052.26	515.044	1.9944	4.6078e-14	6.3642e-13
PGSC0003DMG400000896	696.081	122.629	2.505	4.6416e-14	6.4048e-13
PGSC0003DMG400028842	2605.35	652.033	1.9985	4.7219e-14	6.5094e-13
PGSC0003DMG400022358	1039.66	240.391	2.1127	4.7345e-14	6.5236e-13
PGSC0003DMG401017657	436.855	72.2536	2.596	4.7986e-14	6.6087e-13
PGSC0003DMG400011783	112.758	0	Inf	4.8497e-14	6.6727e-13
PGSC0003DMG400017330	160.172	11.0997	3.851	5.0055e-14	6.8773e-13
PGSC0003DMG400013381	1080.75	245.241	2.1398	5.0259e-14	6.902e-13
PGSC0003DMG400024524	306.584	41.3213	2.8913	5.1548e-14	7.0723e-13
PGSC0003DMG400019645	501.177	84.8788	2.5618	5.3179e-14	7.2753e-13
PGSC0003DMG400012434	7178.91	1951.26	1.8794	5.4001e-14	7.3737e-13
Novel03202	514.177	99.0845	2.3755	5.4572e-14	7.4376e-13
PGSC0003DMG401022314	488.937	90.4434	2.4346	5.5904e-14	7.6156e-13
PGSC0003DMG402022117	851.668	189.041	2.1716	5.6455e-14	7.6824e-13
PGSC0003DMG400012128	1328.47	318.708	2.0595	5.6474e-14	7.6824e-13
PGSC0003DMG400015387	1129.28	42.3495	4.7369	5.9042e-14	8.024e-13
PGSC0003DMG403020240	2382.35	387.031	2.6219	6.1357e-14	8.3309e-13
PGSC0003DMG400005276	501.629	95.1552	2.3983	6.3928e-14	8.6706e-13
PGSC0003DMG400009888	1490.56	362.556	2.0396	6.5637e-14	8.8828e-13
PGSC0003DMG400003993	138.308	8.91029	3.9563	6.6825e-14	9.035e-13
PGSC0003DMG400020253	3225.15	116.219	4.7945	6.7497e-14	9.1216e-13
PGSC0003DMG400016124	131.782	8.16278	4.0129	6.7889e-14	9.1703e-13
PGSC0003DMG400008569	426.94	72.8099	2.5518	6.8777e-14	9.2771e-13
PGSC0003DMG400022612	280.481	39.4932	2.8282	6.9774e-14	9.4029e-13
PGSC0003DMG400029061	579.878	113.995	2.3468	7.0405e-14	9.479e-13
PGSC0003DMG400028303	465.607	53.2444	3.1284	7.1701e-14	9.6445e-13
PGSC0003DMG400008572	749.322	159.697	2.2303	7.3309e-14	9.8517e-13
PGSC0003DMG400026054	267.269	11.8654	4.4935	7.7192e-14	1.0354e-12
PGSC0003DMG400015797	301.328	40.6858	2.8887	7.9069e-14	1.0601e-12
PGSC0003DMG400027590	1343.03	321.514	2.0625	7.9609e-14	1.0659e-12
PGSC0003DMG400030763	3196.57	831.203	1.9433	7.995e-14	1.0694e-12
PGSC0003DMG400015647	297.769	3.04955	6.6095	8.1687e-14	1.0916e-12
PGSC0003DMG400018093	935.132	211.955	2.1414	8.2225e-14	1.0983e-12
PGSC0003DMG400001122	297.029	19.8221	3.9054	8.2412e-14	1.0998e-12
PGSC0003DMG400027736	1726.04	33.8863	5.6706	8.3697e-14	1.1164e-12
PGSC0003DMG400012415	378.91	63.4229	2.5788	8.4314e-14	1.1241e-12
PGSC0003DMG400014595	176.855	14.2041	3.6382	8.5939e-14	1.1448e-12
PGSC0003DMG400016960	228.259	0.827752	8.1073	8.6696e-14	1.1538e-12
PGSC0003DMG400023627	156.789	12.3289	3.6687	8.7285e-14	1.1605e-12
PGSC0003DMG400012156	1926.92	498.679	1.9501	9.0656e-14	1.2048e-12
PGSC0003DMG400022957	1944.15	488.47	1.9928	9.1616e-14	1.2164e-12
PGSC0003DMG400004921	225.535	17.0544	3.7251	9.2391e-14	1.225e-12
PGSC0003DMG400001567	6298.66	1703.42	1.8866	9.2676e-14	1.2282e-12
PGSC0003DMG400009051	887.337	203.289	2.1259	9.3506e-14	1.2385e-12
PGSC0003DMG400025255	157.565	2.59533	5.9239	9.415e-14	1.2461e-12
PGSC0003DMG400030566	175.06	2.91882	5.9063	9.5629e-14	1.2651e-12
PGSC0003DMG400002290	2897.9	766.221	1.9192	9.7297e-14	1.2865e-12
PGSC0003DMG400010900	31746.4	2873.76	3.4656	1.0732e-13	1.4158e-12
PGSC0003DMG400029048	275.449	37.8939	2.8617	1.0796e-13	1.4236e-12
PGSC0003DMG400020287	150.851	10.2077	3.8854	1.0849e-13	1.4299e-12
PGSC0003DMG400017999	578.111	116.795	2.3074	1.0921e-13	1.4388e-12
PGSC0003DMG400003866	4014.32	1097.81	1.8705	1.0948e-13	1.4417e-12
PGSC0003DMG400014809	654.655	63.5417	3.365	1.122e-13	1.4769e-12
PGSC0003DMG400008322	818.113	179.489	2.1884	1.1362e-13	1.4948e-12
PGSC0003DMG400044116	1670.81	412.535	2.018	1.1403e-13	1.4996e-12
PGSC0003DMG400025868	175.117	0	Inf	1.1777e-13	1.5459e-12
PGSC0003DMG400002292	115.813	0.827752	7.1284	1.18e-13	1.5483e-12
PGSC0003DMG400019535	104.783	4.14098	4.6613	1.2433e-13	1.6275e-12
PGSC0003DMG400006592	1956.52	298.907	2.7105	1.3373e-13	1.7483e-12
PGSC0003DMG400030006	1792.94	36.3664	5.6236	1.3545e-13	1.7675e-12
PGSC0003DMG400008434	1453.55	182.64	2.9925	1.3568e-13	1.7697e-12
Novel00248	153.792	10.7855	3.8338	1.3609e-13	1.7743e-12
PGSC0003DMG400019852	717.672	152.718	2.2324	1.3615e-13	1.7743e-12
Novel00941	388.862	64.5106	2.5916	1.4303e-13	1.8589e-12
PGSC0003DMG400018312	346.684	12.0281	4.8491	1.4317e-13	1.8594e-12
PGSC0003DMG400001053	269.62	37.2518	2.8555	1.432e-13	1.8594e-12
PGSC0003DMG400012186	246.712	17.2439	3.8387	1.4334e-13	1.8596e-12
PGSC0003DMG400009077	25532.3	7199.27	1.8264	1.4411e-13	1.8679e-12
PGSC0003DMG400030560	28406.1	7018.97	2.0169	1.4827e-13	1.9175e-12
Novel03233	2743.91	726.245	1.9177	1.52e-13	1.963e-12
PGSC0003DMG400018823	755.209	164.242	2.201	1.5536e-13	2.0056e-12
PGSC0003DMG401019891	189.346	20.7027	3.1931	1.5642e-13	2.0174e-12
PGSC0003DMG400014774	118.759	5.78715	4.359	1.5654e-13	2.0181e-12
PGSC0003DMG400024311	1494.95	375.082	1.9948	1.5898e-13	2.0459e-12
PGSC0003DMG400024204	282.684	40.1932	2.8142	1.6301e-13	2.094e-12
PGSC0003DMG400024954	531.562	107.285	2.3088	1.6825e-13	2.1594e-12
PGSC0003DMG400027014	2863.87	757.717	1.9182	1.7085e-13	2.1918e-12
PGSC0003DMG400009277	1326.83	318.129	2.0603	1.7205e-13	2.2061e-12
PGSC0003DMG400021307	633.953	130.153	2.2842	1.7823e-13	2.2814e-12
PGSC0003DMG400011541	655.528	137.59	2.2523	1.8167e-13	2.3244e-12
PGSC0003DMG400031802	335.581	52.2341	2.6836	1.8595e-13	2.3781e-12
PGSC0003DMG400000227	1159.71	279.969	2.0504	1.8811e-13	2.4035e-12
Novel03133	3199.04	853.892	1.9055	1.9227e-13	2.4546e-12
Novel03035	325.033	48.2999	2.7505	1.953e-13	2.4908e-12
PGSC0003DMG400005162	407.864	28.1267	3.8581	1.9643e-13	2.5032e-12
Novel00528	2282.74	591.222	1.949	2.0449e-13	2.6037e-12
PGSC0003DMG400011044	1677.35	339.029	2.3067	2.0808e-13	2.6459e-12
Novel00442	2822.56	739.933	1.9315	2.1394e-13	2.7156e-12
PGSC0003DMG400002012	618.737	131.557	2.2336	2.2127e-13	2.8037e-12
PGSC0003DMG400029171	403.614	73.1282	2.4645	2.3052e-13	2.9145e-12
PGSC0003DMG400014847	150.061	10.8564	3.7889	2.3218e-13	2.9342e-12
PGSC0003DMG400021163	1253.8	310.137	2.0153	2.3369e-13	2.9507e-12
PGSC0003DMG400020384	800.06	181.582	2.1395	2.3437e-13	2.958e-12
PGSC0003DMG400002777	4169.42	1139.14	1.8719	2.422e-13	3.0528e-12
PGSC0003DMG400000288	938.101	222.784	2.0741	2.4828e-13	3.1254e-12
PGSC0003DMG400023923	170.823	15.2517	3.4855	2.7616e-13	3.4687e-12
PGSC0003DMG400031456	126.48	7.57117	4.0622	2.8565e-13	3.5832e-12
Novel00931	159.306	14.1972	3.4881	2.8911e-13	3.6251e-12
PGSC0003DMG400029491	370.15	64.855	2.5128	2.8951e-13	3.6285e-12
PGSC0003DMG401023631	333.62	32.7798	3.3473	2.9904e-13	3.7463e-12
PGSC0003DMG400005271	355.868	43.4811	3.0329	3.0918e-13	3.8683e-12
PGSC0003DMG400013332	1249.71	313.056	1.9971	3.1655e-13	3.9588e-12
PGSC0003DMG400000621	1429.78	15.9169	6.4891	3.1797e-13	3.9748e-12
PGSC0003DMG400024271	1302.91	229.791	2.5033	3.2096e-13	4.0088e-12
PGSC0003DMG401007333	1869.23	483.99	1.9494	3.2127e-13	4.0109e-12
PGSC0003DMG400002601	6973.42	1944.64	1.8424	3.2265e-13	4.0246e-12
PGSC0003DMG400012577	28477.4	8095.38	1.8146	3.2483e-13	4.0501e-12
Novel00663	291.61	42.1491	2.7905	3.2865e-13	4.0942e-12
PGSC0003DMG400008171	2523.23	674.233	1.904	3.2865e-13	4.0942e-12
PGSC0003DMG400010131	1183.09	29.7818	5.312	3.3831e-13	4.2072e-12
PGSC0003DMG400007960	2345.39	631.024	1.8941	3.6011e-13	4.4707e-12
PGSC0003DMG400028929	4816.9	1353.24	1.8317	3.6858e-13	4.5738e-12
PGSC0003DMG400041767	4036.68	1109.33	1.8635	3.7198e-13	4.614e-12
PGSC0003DMG400006976	2060.23	545.233	1.9179	3.7551e-13	4.6537e-12
PGSC0003DMG400003343	636.878	75.9679	3.0676	3.7615e-13	4.6577e-12
PGSC0003DMG400001924	228.875	17.2374	3.7309	3.8875e-13	4.8034e-12
PGSC0003DMG400021439	473.664	62.8375	2.9142	3.8935e-13	4.8088e-12
PGSC0003DMG400015264	280.391	41.7291	2.7483	3.8998e-13	4.8145e-12
PGSC0003DMG400002903	1926.56	507.311	1.9251	3.9288e-13	4.8472e-12
PGSC0003DMG400025005	456.574	88.4073	2.3686	4.1769e-13	5.1433e-12
Novel03093	4079.36	1145.49	1.8324	4.219e-13	5.193e-12
PGSC0003DMG400022742	5385.68	1490.32	1.8535	4.2277e-13	5.2015e-12
PGSC0003DMG400003792	1157.48	288.748	2.0031	4.5007e-13	5.5161e-12
PGSC0003DMG400029618	13695.7	3891.86	1.8152	4.5046e-13	5.5186e-12
PGSC0003DMG402024654	1248.59	315.764	1.9834	4.5513e-13	5.5711e-12
PGSC0003DMG400013879	5930.27	441.291	3.7483	4.5605e-13	5.58e-12
PGSC0003DMG400030788	4178.62	1155.23	1.8549	4.8311e-13	5.9061e-12
PGSC0003DMG400022377	274.96	42.2578	2.7019	4.92e-13	6.0096e-12
PGSC0003DMG400014173	1282.51	64.6743	4.3096	5.0234e-13	6.1256e-12
PGSC0003DMG400004643	369.343	56.1121	2.7186	5.0289e-13	6.1297e-12
PGSC0003DMG400033632	63.6147	0	Inf	5.0463e-13	6.1483e-12
PGSC0003DMG400033058	1134.91	151.436	2.9058	5.0676e-13	6.1707e-12
PGSC0003DMG402007414	503.837	102.61	2.2958	5.255e-13	6.3837e-12
PGSC0003DMG400022337	140.456	7.1812	4.2897	5.2644e-13	6.3924e-12
PGSC0003DMG402018143	358.286	62.3754	2.5221	5.3087e-13	6.4408e-12
Novel00539	326.758	32.0385	3.3503	5.397e-13	6.5404e-12
PGSC0003DMG400007833	1237.51	309.711	1.9984	5.3976e-13	6.5404e-12
PGSC0003DMG400004890	145.177	11.2491	3.6899	5.4278e-13	6.5714e-12
PGSC0003DMG400026069	3522.49	961.369	1.8734	5.434e-13	6.5734e-12
PGSC0003DMG400024618	501.572	100.312	2.322	5.4643e-13	6.6073e-12
PGSC0003DMG400026516	4671.65	1320.76	1.8226	5.5576e-13	6.7174e-12
PGSC0003DMG400001623	275.225	11.6523	4.5619	5.6506e-13	6.8241e-12
PGSC0003DMG401019826	99.7704	3.8064	4.7121	5.6878e-13	6.866e-12
PGSC0003DMG400022399	1300.21	94.3824	3.7841	5.7428e-13	6.9295e-12
Novel01909	293.042	31.9162	3.1987	5.938e-13	7.1561e-12
PGSC0003DMG402013278	176.313	7.71566	4.5142	5.9517e-13	7.1696e-12
Novel00909	568.368	123.234	2.2054	6.0466e-13	7.2778e-12
PGSC0003DMG402023118	136.51	10.3159	3.7261	6.0891e-13	7.326e-12
PGSC0003DMG400013294	340.495	57.2002	2.5735	6.1965e-13	7.449e-12
PGSC0003DMG400016149	548.916	98.103	2.4842	6.1996e-13	7.4496e-12
PGSC0003DMG400011792	196.061	2.35253	6.3809	6.2107e-13	7.4598e-12
PGSC0003DMG400010319	4036.25	1137.75	1.8268	6.2724e-13	7.5307e-12
PGSC0003DMG400020850	329.707	54.4027	2.5994	6.4997e-13	7.7875e-12
PGSC0003DMG400000119	589.194	126.673	2.2176	6.5439e-13	7.8371e-12
PGSC0003DMG400008169	472.249	92.8894	2.346	6.6243e-13	7.9302e-12
PGSC0003DMG400003318	1004.3	242.071	2.0527	6.7399e-13	8.0586e-12
PGSC0003DMG400019893	1151.87	286.158	2.0091	6.8543e-13	8.1817e-12
Novel03457	290.024	31.7052	3.1934	6.9563e-13	8.2967e-12
PGSC0003DMG400031313	7625.41	968.322	2.9773	7.0006e-13	8.346e-12
PGSC0003DMG400018666	186.742	9.41898	4.3093	7.0315e-13	8.3783e-12
PGSC0003DMG400028602	133.426	9.2683	3.8476	7.0334e-13	8.3783e-12
PGSC0003DMG400000363	237.752	20.9113	3.5071	7.0714e-13	8.42e-12
PGSC0003DMG400026167	68.0036	0.316384	7.7478	7.1135e-13	8.4666e-12
PGSC0003DMG400027315	577.645	123.683	2.2235	7.3163e-13	8.6972e-12
PGSC0003DMG400018800	1667.86	446.303	1.9019	7.384e-13	8.7741e-12
PGSC0003DMG400000672	1166.52	288.465	2.0157	7.6768e-13	9.107e-12
PGSC0003DMG400009037	67.8493	0.38064	7.4778	7.8516e-13	9.3048e-12
Novel01186	1220.36	249.109	2.2925	7.8532e-13	9.3048e-12
PGSC0003DMG400001307	173.858	17.9415	3.2765	7.868e-13	9.3161e-12
PGSC0003DMG400008598	394.006	16.8023	4.5515	7.9768e-13	9.4357e-12
PGSC0003DMG400016790	4358.08	1241.96	1.8111	8.0745e-13	9.5435e-12
PGSC0003DMG400002398	4086.24	1142.8	1.8382	8.2829e-13	9.7777e-12
PGSC0003DMG400032789	259.26	39.841	2.7021	8.3273e-13	9.8182e-12
PGSC0003DMG400029584	65.6255	0	Inf	8.4233e-13	9.9191e-12
PGSC0003DMG401017380	4527.16	1272.29	1.8312	8.5503e-13	1.0056e-11
PGSC0003DMG400015391	1884.23	511.155	1.8821	8.5539e-13	1.0057e-11
PGSC0003DMG400014543	2265.67	614.506	1.8824	8.7473e-13	1.0267e-11
PGSC0003DMG401029354	7810.27	2309.58	1.7577	9.0464e-13	1.0601e-11
PGSC0003DMG400016190	343.132	59.0706	2.5383	9.066e-13	1.062e-11
PGSC0003DMG400011238	592.352	124.877	2.2459	9.1216e-13	1.0672e-11
PGSC0003DMG400000248	6097.97	1724.9	1.8218	9.5143e-13	1.1113e-11
PGSC0003DMG400029421	398.462	72.6901	2.4546	9.535e-13	1.1133e-11
PGSC0003DMG400014898	226.057	30.6073	2.8847	9.7672e-13	1.1395e-11
PGSC0003DMG400023051	848.737	203.792	2.0582	9.836e-13	1.147e-11
PGSC0003DMG400022126	4958.32	1417.48	1.8065	9.8569e-13	1.149e-11
PGSC0003DMG400019260	209.935	24.1087	3.1223	9.8653e-13	1.1495e-11
PGSC0003DMG400025645	2634.15	709.181	1.8931	9.8864e-13	1.1515e-11
PGSC0003DMG400022024	574.702	123.993	2.2126	9.9212e-13	1.1551e-11
PGSC0003DMG400026565	11387.3	3369.33	1.7569	9.9641e-13	1.1592e-11
PGSC0003DMG400019120	201.923	0.697024	8.1784	9.9928e-13	1.162e-11
PGSC0003DMG400027193	3052.79	857.417	1.8321	1.0179e-12	1.1817e-11
PGSC0003DMG400009180	3788.58	1078.59	1.8125	1.0272e-12	1.1916e-11
PGSC0003DMG400015688	339.805	58.1449	2.547	1.0448e-12	1.2106e-11
PGSC0003DMG400012640	4527.69	76.4554	5.888	1.0553e-12	1.2222e-11
PGSC0003DMG400007080	368.716	65.6069	2.4906	1.0697e-12	1.2374e-11
PGSC0003DMG400021122	318.849	19.6497	4.0203	1.0854e-12	1.2546e-11
PGSC0003DMG400031818	874.069	211.212	2.0491	1.1517e-12	1.3291e-11
PGSC0003DMG400014544	1553.93	409.175	1.9251	1.2031e-12	1.3868e-11
PGSC0003DMG400002809	121.58	2.419	5.6514	1.2233e-12	1.4088e-11
PGSC0003DMG400030890	2983.58	834.776	1.8376	1.239e-12	1.4253e-11
PGSC0003DMG400028287	23019.1	2814.91	3.0317	1.2411e-12	1.4271e-11
PGSC0003DMG400027052	1029.16	82.5196	3.6406	1.2573e-12	1.4451e-11
PGSC0003DMG400020626	363.486	17.2307	4.3988	1.27e-12	1.4592e-11
PGSC0003DMG400018583	1041.82	261.509	1.9942	1.3218e-12	1.5163e-11
PGSC0003DMG400011973	719.506	165.299	2.1219	1.3255e-12	1.5199e-11
PGSC0003DMG400028663	75.1302	1.07766	6.1234	1.3275e-12	1.5216e-11
PGSC0003DMG400013579	2180.97	503.063	2.1162	1.379e-12	1.5788e-11
PGSC0003DMG400018350	1774.76	475.394	1.9004	1.424e-12	1.629e-11
PGSC0003DMG400011200	192.136	22.0523	3.1231	1.4275e-12	1.6317e-11
PGSC0003DMG400002868	2622.27	735.124	1.8348	1.4456e-12	1.6518e-11
PGSC0003DMG400024452	128.068	0.894225	7.1621	1.4729e-12	1.6816e-11
PGSC0003DMG400020336	237.326	0.447113	9.052	1.4759e-12	1.6843e-11
PGSC0003DMG400016193	199.75	24.4926	3.0278	1.51e-12	1.7219e-11
PGSC0003DMG401030517	249.19	1.7769	7.1317	1.5107e-12	1.722e-11
PGSC0003DMG400025299	4665.98	1351.89	1.7872	1.5634e-12	1.7786e-11
PGSC0003DMG400013018	127.332	1.84116	6.1118	1.5795e-12	1.7941e-11
PGSC0003DMG400025304	865.409	1.27487	9.4069	1.6045e-12	1.8217e-11
PGSC0003DMG402013561	3578.21	1029.14	1.7978	1.6101e-12	1.8274e-11
PGSC0003DMG400009703	1305.31	26.7876	5.6067	1.6819e-12	1.9051e-11
PGSC0003DMG400009743	416.071	79.5253	2.3873	1.7044e-12	1.9298e-11
PGSC0003DMG402006052	3938.12	641.407	2.6182	1.7261e-12	1.9529e-11
Novel01970	156.713	1.27487	6.9416	1.728e-12	1.9543e-11
PGSC0003DMG400001656	375.151	65.6547	2.5145	1.7355e-12	1.962e-11
PGSC0003DMG400026201	98.3738	3.8246	4.6849	1.7749e-12	2.0018e-11
PGSC0003DMG400026356	3019.97	728.723	2.0511	1.7858e-12	2.0134e-11
PGSC0003DMG400014656	452.447	89.1268	2.3438	1.8648e-12	2.099e-11
PGSC0003DMG400030594	545.235	118.415	2.203	1.8669e-12	2.1006e-11
PGSC0003DMG400025815	764.205	177.566	2.1056	2.0139e-12	2.2642e-11
PGSC0003DMG400006621	1055.72	273.635	1.9479	2.096e-12	2.3529e-11
PGSC0003DMG400004285	4266.38	1249.3	1.7719	2.1097e-12	2.3664e-11
PGSC0003DMG400020426	322.088	37.3154	3.1096	2.1117e-12	2.3678e-11
PGSC0003DMG400030422	3172.69	916.561	1.7914	2.1656e-12	2.4245e-11
PGSC0003DMG400000047	4314.18	854.188	2.3365	2.17e-12	2.4284e-11
PGSC0003DMG400027382	736.434	174.155	2.0802	2.2849e-12	2.5521e-11
PGSC0003DMG400002894	1677.1	452.046	1.8914	2.2894e-12	2.5561e-11
PGSC0003DMG400030509	2028.83	205.029	3.3067	2.2922e-12	2.5582e-11
PGSC0003DMG400010090	1260.1	331.862	1.9249	2.3219e-12	2.5884e-11
PGSC0003DMG400023912	698.912	162.832	2.1017	2.3386e-12	2.6059e-11
PGSC0003DMG400046813	409.521	11.2673	5.1837	2.4363e-12	2.7096e-11
PGSC0003DMG400013482	753.57	182.67	2.0445	2.4426e-12	2.7156e-11
PGSC0003DMG400029701	2161.63	610.017	1.8252	2.4722e-12	2.7464e-11
Novel02399	3223.46	517.021	2.6403	2.4989e-12	2.7728e-11
PGSC0003DMG400016257	114.168	6.41281	4.1541	2.586e-12	2.8673e-11
PGSC0003DMG400030337	341.034	62.2464	2.4539	2.6369e-12	2.9214e-11
PGSC0003DMG400017732	408.839	77.8016	2.3937	2.6836e-12	2.971e-11
PGSC0003DMG400001426	2207.82	49.6109	5.4758	2.6939e-12	2.9811e-11
PGSC0003DMG400000021	2074.17	580.102	1.8382	2.753e-12	3.0431e-11
PGSC0003DMG400014264	581.833	130.867	2.1525	2.8903e-12	3.19e-11
PGSC0003DMG400006458	90.4563	2.48547	5.1856	3.0655e-12	3.3782e-11
PGSC0003DMG401013304	235.345	32.2489	2.8675	3.1126e-12	3.4288e-11
PGSC0003DMG400011392	2848.37	799.803	1.8324	3.1209e-12	3.4366e-11
PGSC0003DMG400033691	692.85	161.495	2.1011	3.1449e-12	3.4609e-11
PGSC0003DMG400006348	452.913	92.6741	2.289	3.1454e-12	3.4609e-11
PGSC0003DMG400023376	544.438	121.966	2.1583	3.1698e-12	3.4851e-11
PGSC0003DMG400001685	2404.63	676.172	1.8304	3.2235e-12	3.5387e-11
PGSC0003DMG400025819	1687.92	447.666	1.9148	3.231e-12	3.5456e-11
PGSC0003DMG400027954	1319.25	257.852	2.3551	3.6258e-12	3.9668e-11
PGSC0003DMG400008461	72.4952	1.14414	5.9856	3.6428e-12	3.9823e-11
PGSC0003DMG400003410	1849.95	506.841	1.8679	3.667e-12	4.0073e-11
PGSC0003DMG400023428	3328.93	468.396	2.8293	3.9206e-12	4.278e-11
PGSC0003DMG400027771	5928.27	1545.43	1.9396	3.9319e-12	4.2887e-11
PGSC0003DMG400028151	10911.3	3260.95	1.7425	3.9893e-12	4.348e-11
PGSC0003DMG400018165	729.726	174.27	2.066	4.0847e-12	4.4418e-11
Novel01055	167.143	18.3824	3.1847	4.1573e-12	4.5124e-11
PGSC0003DMG400019728	2438.8	470.508	2.3739	4.1682e-12	4.5225e-11
PGSC0003DMG400026404	121.569	7.80464	3.9613	4.2283e-12	4.5842e-11
PGSC0003DMG400008481	2064.99	579.501	1.8333	4.2546e-12	4.6093e-11
PGSC0003DMG400004795	1192.78	188.943	2.6583	4.2761e-12	4.629e-11
PGSC0003DMG400013345	119.827	8.46983	3.8225	4.3131e-12	4.6672e-11
PGSC0003DMG400012543	794.495	144.669	2.4573	4.3145e-12	4.6672e-11
PGSC0003DMG401021239	757.001	128.766	2.5555	4.3203e-12	4.6717e-11
PGSC0003DMG400022311	373.198	73.2535	2.349	4.3973e-12	4.7532e-11
PGSC0003DMG400019578	1315.21	344.325	1.9334	4.4294e-12	4.7852e-11
PGSC0003DMG400009900	6413.04	1753.99	1.8704	4.4303e-12	4.7852e-11
PGSC0003DMG402021239	429.712	84.3958	2.3481	4.4717e-12	4.8263e-11
PGSC0003DMG400046427	379.186	71.722	2.4024	4.5224e-12	4.8792e-11
PGSC0003DMG400005155	18363.7	2111	3.1209	4.7124e-12	5.0691e-11
PGSC0003DMG400004900	222.074	18.5468	3.5818	4.7332e-12	5.0877e-11
PGSC0003DMG400006405	666.216	105.063	2.6647	4.8192e-12	5.1762e-11
PGSC0003DMG401030861	2052.4	585.087	1.8106	4.9409e-12	5.295e-11
PGSC0003DMG400015626	3968.33	1170.46	1.7615	5.0752e-12	5.4329e-11
PGSC0003DMG400004860	1620.29	440.104	1.8803	5.1095e-12	5.4676e-11
PGSC0003DMG400023949	162.969	17.6025	3.2107	5.2685e-12	5.6253e-11
Novel02409	63.5704	0.38064	7.3838	5.3265e-12	5.6788e-11
PGSC0003DMG400011055	3442.43	940.721	1.8716	5.3715e-12	5.7221e-11
PGSC0003DMG400006830	899.864	226.081	1.9929	5.4889e-12	5.8433e-11
PGSC0003DMG400009063	5887.93	1750	1.7504	5.5362e-12	5.8915e-11
PGSC0003DMG400020258	67.989	0.76128	6.4807	5.6729e-12	6.0347e-11
PGSC0003DMG400000807	490.959	55.2949	3.1504	5.7207e-12	6.0833e-11
PGSC0003DMG400004351	1383.34	385.978	1.8416	5.8602e-12	6.2247e-11
PGSC0003DMG402002659	701.874	169.962	2.046	5.879e-12	6.2424e-11
PGSC0003DMG400012642	1794.12	518.973	1.7895	5.9211e-12	6.2826e-11
PGSC0003DMG400023957	121.287	8.63507	3.8121	6.0542e-12	6.419e-11
PGSC0003DMG400002013	308.067	52.6917	2.5476	6.1688e-12	6.5309e-11
PGSC0003DMG400004936	846.188	115.065	2.8785	6.1758e-12	6.5359e-11
PGSC0003DMG403018293	7652.66	2312.45	1.7265	6.1924e-12	6.5511e-11
PGSC0003DMG400000347	1380.94	383.285	1.8492	6.4489e-12	6.8149e-11
PGSC0003DMG400002784	540.341	122.034	2.1466	6.454e-12	6.8178e-11
PGSC0003DMG400015597	1502.5	410.71	1.8712	6.4903e-12	6.8512e-11
PGSC0003DMG400006965	914.329	27.0902	5.0769	6.498e-12	6.8568e-11
Novel03624	4677.23	1377.6	1.7635	6.7406e-12	7.1075e-11
PGSC0003DMG400026531	506.322	108.193	2.2264	6.8654e-12	7.2313e-11
PGSC0003DMG400027684	37791	5823.72	2.698	6.876e-12	7.2397e-11
PGSC0003DMG400014429	4328.26	1282.92	1.7544	7.0198e-12	7.3858e-11
PGSC0003DMG400026389	352.06	67.2719	2.3877	7.2553e-12	7.6252e-11
PGSC0003DMG400029479	208.54	16.5342	3.6568	7.3018e-12	7.6684e-11
PGSC0003DMG400000587	552.658	127.048	2.121	7.3686e-12	7.7358e-11
PGSC0003DMG400005498	3939.6	133.607	4.882	7.5018e-12	7.867e-11
PGSC0003DMG400014466	111.212	7.32126	3.9251	7.6973e-12	8.0662e-11
PGSC0003DMG400046831	192.093	23.9626	3.0029	7.7975e-12	8.1623e-11
PGSC0003DMG400013176	66.3177	0.827752	6.3241	7.8113e-12	8.1738e-11
PGSC0003DMG400004943	1341.89	371.392	1.8533	7.8554e-12	8.214e-11
PGSC0003DMG400013982	1382.26	142.568	3.2773	7.8843e-12	8.2412e-11
Novel00804	1869.19	531.311	1.8148	8.1161e-12	8.4682e-11
PGSC0003DMG400012255	1189.73	306.615	1.9561	8.5016e-12	8.864e-11
PGSC0003DMG400024616	264.011	42.4269	2.6375	8.607e-12	8.9706e-11
PGSC0003DMG400024071	2092.84	604.788	1.791	8.7912e-12	9.1527e-11
PGSC0003DMG400010653	496.288	109.141	2.185	9.0428e-12	9.4112e-11
Novel01567	1470.97	404.444	1.8628	9.0868e-12	9.4537e-11
PGSC0003DMG400010437	1409.73	382.518	1.8818	9.3475e-12	9.7214e-11
PGSC0003DMG400019121	271.978	10.6783	4.6707	9.4776e-12	9.8495e-11
PGSC0003DMG400028213	174.123	20.2599	3.1034	9.4928e-12	9.8583e-11
PGSC0003DMG400021717	3515.16	1074.68	1.7097	9.6718e-12	1.0037e-10
Novel01793	1366.7	382.152	1.8385	9.7031e-12	1.0066e-10
PGSC0003DMG400026287	126.232	8.18796	3.9464	9.9615e-12	1.0312e-10
PGSC0003DMG400028349	1690.39	434.533	1.9598	1.0058e-11	1.0407e-10
PGSC0003DMG400026623	190.662	21.4266	3.1535	1.0238e-11	1.0586e-10
PGSC0003DMG400028310	694.79	90.3737	2.9426	1.0402e-11	1.0748e-10
PGSC0003DMG400002944	275.319	46.3844	2.5694	1.0409e-11	1.0752e-10
PGSC0003DMG400004977	6525.64	1329.85	2.2949	1.0494e-11	1.0836e-10
PGSC0003DMG400003988	1241.24	256.247	2.2762	1.0518e-11	1.0857e-10
PGSC0003DMG402023644	327.142	18.2283	4.1657	1.1007e-11	1.1337e-10
Novel02504	59.6685	0	Inf	1.1325e-11	1.166e-10
PGSC0003DMG400009042	913.045	19.3245	5.5622	1.1589e-11	1.1919e-10
Novel01578	58.9439	0	Inf	1.1772e-11	1.2094e-10
PGSC0003DMG400003755	9881.8	3008.86	1.7156	1.1832e-11	1.2152e-10
PGSC0003DMG402017934	55.7041	0	Inf	1.1922e-11	1.224e-10
PGSC0003DMG400021267	1114.67	300.622	1.8906	1.2186e-11	1.2484e-10
PGSC0003DMG400029151	200.88	26.8947	2.9009	1.2244e-11	1.2535e-10
PGSC0003DMG400019130	1906.29	559.481	1.7686	1.2419e-11	1.2705e-10
PGSC0003DMG400025608	577.846	136.203	2.0849	1.2428e-11	1.2709e-10
PGSC0003DMG400025134	5055.53	1571.98	1.6853	1.2607e-11	1.2888e-10
PGSC0003DMG400021493	1358.7	373.207	1.8642	1.271e-11	1.2988e-10
PGSC0003DMG400022749	149.082	13.8005	3.4333	1.3192e-11	1.3453e-10
Novel00490	1960.6	581.212	1.7542	1.3267e-11	1.352e-10
PGSC0003DMG400022129	246.56	39.5161	2.6414	1.3343e-11	1.3593e-10
PGSC0003DMG400000159	217.166	15.4427	3.8138	1.3581e-11	1.3815e-10
PGSC0003DMG400014051	521.272	121.38	2.1025	1.3941e-11	1.4171e-10
Novel01441	575.643	134.988	2.0923	1.3986e-11	1.4207e-10
PGSC0003DMG400019471	61.2027	0.316384	7.5958	1.4262e-11	1.4483e-10
PGSC0003DMG400026382	155.026	16.7265	3.2123	1.4361e-11	1.4573e-10
PGSC0003DMG400028681	1786.94	396.19	2.1732	1.4777e-11	1.4979e-10
PGSC0003DMG400004374	369.727	79.5487	2.2166	1.489e-11	1.5088e-10
PGSC0003DMG400020819	195.123	25.6775	2.9258	1.5055e-11	1.525e-10
PGSC0003DMG400017824	1322.98	372.884	1.827	1.5887e-11	1.607e-10
PGSC0003DMG400025866	727.069	181.896	1.999	1.6033e-11	1.6213e-10
PGSC0003DMG400002612	373.888	74.0448	2.3361	1.6124e-11	1.6298e-10
PGSC0003DMG400010530	1256.85	354.58	1.8256	1.6236e-11	1.64e-10
PGSC0003DMG402018963	3390.28	1030.7	1.7178	1.6527e-11	1.6682e-10
PGSC0003DMG400005175	792.288	202.638	1.9671	1.6532e-11	1.6682e-10
PGSC0003DMG400001976	720.892	155.165	2.216	1.7126e-11	1.7263e-10
PGSC0003DMG400003376	318.735	9.45793	5.0747	1.7236e-11	1.7368e-10
PGSC0003DMG400016412	5653.68	1735.12	1.7042	1.7259e-11	1.7385e-10
PGSC0003DMG400017221	6181.64	1286.25	2.2648	1.7719e-11	1.7818e-10
PGSC0003DMG400000291	7137.35	2178.31	1.7122	1.8508e-11	1.8571e-10
PGSC0003DMG401004334	4064.27	1245.42	1.7064	1.8556e-11	1.8607e-10
PGSC0003DMG403024882	1986.43	569.002	1.8037	1.8662e-11	1.8701e-10
PGSC0003DMG400001709	1531.39	444.821	1.7835	1.91e-11	1.912e-10
PGSC0003DMG400013275	592.94	149.284	1.9898	1.9558e-11	1.9565e-10
PGSC0003DMG400003293	120.059	9.7265	3.6257	1.9596e-11	1.9595e-10
Novel01692	1165.47	24.3499	5.5809	1.9924e-11	1.9917e-10
PGSC0003DMG400023187	544.019	126.754	2.1016	2.0216e-11	2.0194e-10
PGSC0003DMG400041963	3223.29	514.425	2.6475	2.0284e-11	2.0255e-10
PGSC0003DMG400030334	993.99	260.011	1.9347	2.0602e-11	2.0566e-10
PGSC0003DMG400032562	779.711	149.069	2.387	2.063e-11	2.0587e-10
PGSC0003DMG402023438	10769.3	3277.04	1.7165	2.08e-11	2.0749e-10
PGSC0003DMG400021506	2504.38	590.67	2.084	2.0859e-11	2.08e-10
PGSC0003DMG400001433	286.372	49.7915	2.5239	2.1349e-11	2.1274e-10
Novel01717	1853.07	496.163	1.901	2.1536e-11	2.1454e-10
PGSC0003DMG400007993	195.016	26.2411	2.8937	2.1619e-11	2.1529e-10
PGSC0003DMG400000340	80.9956	2.6667	4.9247	2.1719e-11	2.162e-10
PGSC0003DMG400006622	1250.69	344.478	1.8602	2.1808e-11	2.1702e-10
PGSC0003DMG400003007	411.728	88.8987	2.2115	2.1887e-11	2.1773e-10
PGSC0003DMG400013116	54083.4	7923.31	2.771	2.2015e-11	2.1893e-10
PGSC0003DMG400018342	434.278	94.6974	2.1972	2.2148e-11	2.2017e-10
Novel02752	2035.16	106.389	4.2577	2.3438e-11	2.326e-10
Novel01418	3197.07	991.636	1.6889	2.4031e-11	2.3815e-10
PGSC0003DMG400005500	1965.27	586.232	1.7452	2.4329e-11	2.4086e-10
PGSC0003DMG400012721	150.13	11.7825	3.6715	2.5609e-11	2.5293e-10
PGSC0003DMG400002904	5842.68	1835.72	1.6703	2.561e-11	2.5293e-10
PGSC0003DMG400002879	113.605	8.32534	3.7704	2.5838e-11	2.551e-10
PGSC0003DMG400016292	231.401	38.0548	2.6042	2.6093e-11	2.5753e-10
PGSC0003DMG400030607	351.466	69.2843	2.3428	2.6267e-11	2.5915e-10
PGSC0003DMG400018854	280.857	50.1266	2.4862	2.6432e-11	2.6069e-10
PGSC0003DMG401019176	3349.96	1014.37	1.7236	2.6483e-11	2.6111e-10
PGSC0003DMG400030219	2091.94	634.809	1.7204	2.6929e-11	2.6533e-10
PGSC0003DMG401002024	362.843	73.3137	2.3072	2.758e-11	2.7165e-10
PGSC0003DMG400023547	58.812	0.447113	7.0393	2.786e-11	2.7431e-10
PGSC0003DMG400009650	2566.65	767.082	1.7424	2.817e-11	2.7718e-10
PGSC0003DMG400006283	43054.6	12952	1.733	2.8385e-11	2.792e-10
PGSC0003DMG400017055	369.623	77.0151	2.2628	2.9515e-11	2.9001e-10
PGSC0003DMG400000334	207.281	9.35472	4.4697	2.9763e-11	2.9221e-10
PGSC0003DMG400008907	783.449	200.747	1.9645	2.9769e-11	2.9221e-10
PGSC0003DMG400000231	1667.88	493.74	1.7562	2.9825e-11	2.9266e-10
PGSC0003DMG400011446	1374.11	396.41	1.7934	3.0104e-11	2.953e-10
PGSC0003DMG400025171	8185.14	901.954	3.1819	3.0693e-11	3.0097e-10
PGSC0003DMG400021143	1152.35	299.294	1.9449	3.1603e-11	3.0937e-10
PGSC0003DMG400019873	290.262	53.0414	2.4522	3.183e-11	3.1138e-10
PGSC0003DMG400030919	124.862	9.90947	3.6554	3.2525e-11	3.1796e-10
PGSC0003DMG400022164	240.35	38.8611	2.6287	3.2599e-11	3.1858e-10
PGSC0003DMG400013215	614.549	135.613	2.18	3.2878e-11	3.212e-10
PGSC0003DMG400025038	490.921	111.954	2.1326	3.4227e-11	3.3358e-10
PGSC0003DMG400025523	673.28	164.537	2.0328	3.4752e-11	3.3841e-10
Novel02588	691.427	99.9815	2.7898	3.4758e-11	3.3841e-10
PGSC0003DMG400022568	262.707	45.8748	2.5177	3.4994e-11	3.406e-10
PGSC0003DMG400015203	590.241	144.887	2.0264	3.5107e-11	3.4159e-10
PGSC0003DMG400023337	5679.08	1772.89	1.6795	3.5293e-11	3.4316e-10
PGSC0003DMG400030880	1818.97	554.948	1.7127	3.5387e-11	3.4396e-10
PGSC0003DMG400013436	8056.79	137.284	5.875	3.6e-11	3.4969e-10
PGSC0003DMG400008834	143.457	14.6948	3.2872	3.6132e-11	3.5085e-10
PGSC0003DMG400028211	509.295	118.934	2.0983	3.6479e-11	3.541e-10
PGSC0003DMG400017756	2339.54	196.36	3.5746	3.656e-11	3.5476e-10
PGSC0003DMG400006235	62.2388	0.827752	6.2325	3.68e-11	3.5697e-10
PGSC0003DMG400002810	375.665	83.2128	2.1746	3.6852e-11	3.5736e-10
PGSC0003DMG400022103	75.8061	2.35031	5.0114	3.7057e-11	3.5923e-10
PGSC0003DMG400003050	4021.1	1090.24	1.883	3.7512e-11	3.6327e-10
Novel02023	2682.65	441.702	2.6025	3.8026e-11	3.6775e-10
PGSC0003DMG402000515	595.531	142.328	2.065	3.8207e-11	3.6937e-10
PGSC0003DMG400022632	266.36	44.6349	2.5771	3.8298e-11	3.7013e-10
PGSC0003DMG400026760	241.054	38.2837	2.6546	3.8782e-11	3.7456e-10
PGSC0003DMG400030842	6586.65	351.352	4.2286	3.9345e-11	3.7974e-10
PGSC0003DMG400026111	147.02	14.7909	3.3132	3.9717e-11	3.8308e-10
PGSC0003DMG400029466	110.767	7.61898	3.8618	3.9836e-11	3.8409e-10
PGSC0003DMG400019991	257.857	13.6374	4.2409	4.1018e-11	3.9457e-10
PGSC0003DMG400006148	255.211	42.7965	2.5761	4.3091e-11	4.1382e-10
PGSC0003DMG400028124	120.723	9.57536	3.6562	4.4067e-11	4.2277e-10
PGSC0003DMG400001459	723.96	170.05	2.0899	4.4152e-11	4.2345e-10
PGSC0003DMG400022747	1204.44	223.759	2.4283	4.419e-11	4.2367e-10
PGSC0003DMG400027269	1376.02	404.245	1.7672	4.5008e-11	4.3108e-10
PGSC0003DMG402020263	210.58	32.3012	2.7047	4.5094e-11	4.3176e-10
PGSC0003DMG400018248	1128.02	181.811	2.6333	4.5454e-11	4.3507e-10
PGSC0003DMG400007947	1536.85	452.531	1.7639	4.6208e-11	4.4213e-10
PGSC0003DMG400000508	940.338	260.256	1.8533	4.7575e-11	4.5446e-10
PGSC0003DMG400007899	14434	4701.77	1.6182	4.7602e-11	4.5457e-10
PGSC0003DMG400002497	2006.29	432.254	2.2146	4.8173e-11	4.5942e-10
PGSC0003DMG400005232	8425.36	2694.96	1.6445	4.9329e-11	4.7028e-10
PGSC0003DMG400014171	1588.96	459.107	1.7912	5.041e-11	4.7996e-10
Novel01890	116.498	9.67822	3.5894	5.0765e-11	4.8317e-10
PGSC0003DMG400003583	718.977	187.686	1.9376	5.1072e-11	4.8577e-10
PGSC0003DMG400008977	1063.42	281.357	1.9182	5.1221e-11	4.8703e-10
PGSC0003DMG400028633	57.2278	0.38064	7.2321	5.2411e-11	4.9769e-10
PGSC0003DMG400000534	1168.02	191.383	2.6095	5.3006e-11	5.0301e-10
PGSC0003DMG400012206	486.832	117.341	2.0527	5.4554e-11	5.1719e-10
PGSC0003DMG400005855	218.947	34.8953	2.6495	5.4634e-11	5.1778e-10
PGSC0003DMG400015564	2534.85	576.463	2.1366	5.9659e-11	5.6466e-10
PGSC0003DMG400030418	153.353	18.7737	3.0301	6.0086e-11	5.6851e-10
PGSC0003DMG400010987	71.8526	1.34134	5.7433	6.0463e-11	5.717e-10
PGSC0003DMG400018718	230.262	38.2683	2.5891	6.0506e-11	5.7193e-10
PGSC0003DMG400009235	1633.76	479.287	1.7692	6.0968e-11	5.7572e-10
PGSC0003DMG400024634	1569.46	11.0283	7.1529	6.3198e-11	5.96e-10
PGSC0003DMG400003604	621.358	156.269	1.9914	6.3315e-11	5.9691e-10
PGSC0003DMG400017350	1161.99	338.206	1.7806	6.3779e-11	6.0069e-10
PGSC0003DMG400017538	518.645	112.405	2.206	6.4194e-11	6.044e-10
PGSC0003DMG400021911	211.383	29.5668	2.8378	6.4253e-11	6.0476e-10
PGSC0003DMG401009429	324.469	65.6823	2.3045	6.5109e-11	6.1262e-10
PGSC0003DMG400023340	4197.38	1188.94	1.8198	6.6005e-11	6.2065e-10
PGSC0003DMG400014867	7463.99	107.48	6.1178	6.8548e-11	6.4371e-10
PGSC0003DMG400006931	425.069	95.4431	2.155	6.8934e-11	6.4713e-10
PGSC0003DMG400009177	295.638	53.4547	2.4674	6.9072e-11	6.4821e-10
PGSC0003DMG400014802	51.7179	0	Inf	6.9563e-11	6.524e-10
PGSC0003DMG400031091	696.546	59.5669	3.5476	7.5025e-11	7.0203e-10
PGSC0003DMG400023482	2804.32	816.353	1.7804	7.5777e-11	7.0838e-10
PGSC0003DMG400006871	2319.29	667.519	1.7968	7.7545e-11	7.2373e-10
PGSC0003DMG400003384	599.788	1.52699	8.6176	7.807e-11	7.2839e-10
PGSC0003DMG400005656	4233.81	739.709	2.5169	8.043e-11	7.4944e-10
PGSC0003DMG400027203	281.514	52.6754	2.418	8.3299e-11	7.7542e-10
PGSC0003DMG400027877	1676.76	510.81	1.7148	8.3867e-11	7.8046e-10
PGSC0003DMG400007247	139.568	2.73538	5.6731	8.4142e-11	7.8277e-10
PGSC0003DMG400016524	60.5067	0.76128	6.3125	8.4796e-11	7.8859e-10
PGSC0003DMG400001399	868.004	234.738	1.8867	8.5172e-11	7.9183e-10
PGSC0003DMG400019267	183.557	17.2808	3.409	8.6113e-11	8.0007e-10
PGSC0003DMG400023440	1303.65	387.757	1.7493	8.6794e-11	8.0587e-10
Novel01713	784.187	102.492	2.9357	8.7746e-11	8.1367e-10
PGSC0003DMG400011972	64.1781	1.07988	5.8931	8.868e-11	8.218e-10
PGSC0003DMG400031473	1738.97	531.085	1.7112	9.0594e-11	8.3899e-10
PGSC0003DMG400037583	10251.1	3337.38	1.619	9.0897e-11	8.4099e-10
PGSC0003DMG400025295	141.15	10.556	3.7411	9.1012e-11	8.4179e-10
PGSC0003DMG400011218	1783.73	541.033	1.7211	9.2764e-11	8.5689e-10
PGSC0003DMG400003723	1085.09	305.135	1.8303	9.3357e-11	8.6182e-10
PGSC0003DMG400023424	15895.1	5254.76	1.5969	9.4587e-11	8.7262e-10
PGSC0003DMG400028143	322.062	65.5595	2.2965	9.7064e-11	8.949e-10
PGSC0003DMG401021138	3629.84	1161.89	1.6434	9.7276e-11	8.9656e-10
PGSC0003DMG400026172	371.904	83.9532	2.1473	9.9878e-11	9.1967e-10
Novel02556	766.699	205.109	1.9023	1.0033e-10	9.2356e-10
PGSC0003DMG400017338	459.396	106.918	2.1032	1.0226e-10	9.4104e-10
PGSC0003DMG400006033	64.3598	1.07766	5.9002	1.0723e-10	9.8519e-10
PGSC0003DMG400016334	1952.14	596.582	1.7103	1.0767e-10	9.8871e-10
PGSC0003DMG400019300	466.565	40.158	3.5383	1.0943e-10	1.0038e-09
PGSC0003DMG400028815	2969.66	932.979	1.6704	1.1102e-10	1.0174e-09
PGSC0003DMG400001195	295.569	58.9514	2.3259	1.1126e-10	1.0192e-09
PGSC0003DMG400001096	1066.46	211.595	2.3334	1.1234e-10	1.0282e-09
PGSC0003DMG400004631	154.58	17.7075	3.1259	1.1503e-10	1.0525e-09
PGSC0003DMG400000523	220.644	37.5797	2.5537	1.1696e-10	1.0693e-09
PGSC0003DMG400025261	628.935	9.07729	6.1145	1.1968e-10	1.0929e-09
PGSC0003DMG400024749	2024.59	615.776	1.7172	1.2014e-10	1.0968e-09
PGSC0003DMG400013037	819.898	228.726	1.8418	1.2049e-10	1.0993e-09
PGSC0003DMG400011391	365.811	30.9515	3.563	1.2116e-10	1.1051e-09
PGSC0003DMG400035647	55.7286	0.38064	7.1938	1.2545e-10	1.1427e-09
PGSC0003DMG402003899	1983.09	618.825	1.6801	1.269e-10	1.1552e-09
PGSC0003DMG400002396	2567.72	658.452	1.9633	1.2854e-10	1.1697e-09
PGSC0003DMG400017948	809.306	221.445	1.8697	1.3059e-10	1.1877e-09
PGSC0003DMG400030443	93.0291	4.77375	4.2845	1.3291e-10	1.208e-09
PGSC0003DMG400002169	1026.33	258.51	1.9892	1.3297e-10	1.2081e-09
Novel01421	380.018	55.4273	2.7774	1.3358e-10	1.2125e-09
PGSC0003DMG400012136	1104.75	318.016	1.7966	1.3733e-10	1.2462e-09
PGSC0003DMG400002932	95.685	5.5784	4.1004	1.3777e-10	1.2494e-09
PGSC0003DMG400004922	388.578	88.7061	2.1311	1.3928e-10	1.2623e-09
PGSC0003DMG400006768	2098.29	651.791	1.6867	1.4022e-10	1.27e-09
PGSC0003DMG400012185	1803.17	339.561	2.4088	1.4051e-10	1.2723e-09
PGSC0003DMG400027201	2720.01	870.135	1.6443	1.4452e-10	1.3074e-09
PGSC0003DMG400026246	2901.77	917.552	1.6611	1.4502e-10	1.3111e-09
PGSC0003DMG400020365	1034.85	303.247	1.7709	1.4779e-10	1.3352e-09
PGSC0003DMG400025692	520.842	131.394	1.9869	1.507e-10	1.3603e-09
PGSC0003DMG400022599	72.5123	2.28827	4.9859	1.5144e-10	1.3665e-09
PGSC0003DMG400008313	1755.73	529.735	1.7287	1.5181e-10	1.3694e-09
PGSC0003DMG400008961	2575.96	810.554	1.6681	1.5682e-10	1.4128e-09
PGSC0003DMG400026035	128.988	13.6215	3.2433	1.5713e-10	1.4152e-09
PGSC0003DMG401000674	181.248	27.1748	2.7376	1.5717e-10	1.4152e-09
PGSC0003DMG400018353	97.2467	3.06332	4.9885	1.5858e-10	1.4269e-09
PGSC0003DMG400001718	2887.94	903.313	1.6767	1.5984e-10	1.4369e-09
PGSC0003DMG400009237	175.356	25.1666	2.8007	1.6049e-10	1.4419e-09
PGSC0003DMG400020286	1769.95	542.424	1.7062	1.6201e-10	1.4546e-09
PGSC0003DMG400022906	1191.2	348.955	1.7713	1.6335e-10	1.4662e-09
PGSC0003DMG400006233	902.257	35.3659	4.6731	1.699e-10	1.5221e-09
PGSC0003DMG400027109	350.202	76.5707	2.1933	1.7032e-10	1.525e-09
PGSC0003DMG400007858	70.5059	0.38064	7.5332	1.7033e-10	1.525e-09
PGSC0003DMG400029075	1158.56	247.814	2.225	1.7051e-10	1.5261e-09
PGSC0003DMG400005507	1985.91	635.66	1.6435	1.7107e-10	1.5302e-09
PGSC0003DMG400000898	1036.95	295.578	1.8107	1.7478e-10	1.5629e-09
PGSC0003DMG400002918	1557.05	280.59	2.4723	1.8145e-10	1.621e-09
PGSC0003DMG400004007	1271.99	377.509	1.7525	1.8598e-10	1.6595e-09
PGSC0003DMG400028642	3505.39	1072.25	1.7089	1.8945e-10	1.6889e-09
PGSC0003DMG400023592	4220.98	400.799	3.3966	1.8978e-10	1.6913e-09
Novel00676	679.515	181.171	1.9072	1.9167e-10	1.7071e-09
PGSC0003DMG400024615	1501.8	24.575	5.9334	1.927e-10	1.7158e-09
PGSC0003DMG400016390	413.947	95.1235	2.1216	1.936e-10	1.7227e-09
PGSC0003DMG400016498	95.4591	6.74342	3.8233	1.9934e-10	1.7721e-09
PGSC0003DMG400019894	429.595	22.2757	4.2694	2.0029e-10	1.7795e-09
Novel02031	4411.27	1439.31	1.6158	2.0072e-10	1.7822e-09
Novel01059	404.606	92.6048	2.1274	2.123e-10	1.8821e-09
PGSC0003DMG401026043	301.154	61.435	2.2934	2.2087e-10	1.9557e-09
PGSC0003DMG400030097	674.1	46.8365	3.8473	2.2108e-10	1.957e-09
PGSC0003DMG400007581	2005.3	139.165	3.849	2.2549e-10	1.9941e-09
PGSC0003DMG400022450	509.714	126.884	2.0062	2.3131e-10	2.0437e-09
PGSC0003DMG400023405	319.87	67.0652	2.2538	2.3361e-10	2.0633e-09
PGSC0003DMG400011015	615.763	21.7111	4.8259	2.3367e-10	2.0633e-09
PGSC0003DMG400024240	53.913	0.38064	7.1461	2.3806e-10	2.1014e-09
PGSC0003DMG400005079	2021.42	634.879	1.6708	2.5723e-10	2.2679e-09
PGSC0003DMG400013196	1848.76	588.227	1.6521	2.5871e-10	2.2802e-09
PGSC0003DMG400024631	2912.54	925.496	1.654	2.5999e-10	2.2909e-09
PGSC0003DMG400000412	380.285	43.4147	3.1308	2.6058e-10	2.2946e-09
PGSC0003DMG400018916	3634.51	199.686	4.186	2.6252e-10	2.311e-09
PGSC0003DMG400011909	4740.1	1371.86	1.7888	2.6416e-10	2.3247e-09
PGSC0003DMG400011821	125.198	3.10669	5.3327	2.7228e-10	2.3925e-09
PGSC0003DMG400011106	3638.91	1213.19	1.5847	2.8221e-10	2.4768e-09
PGSC0003DMG400015444	724.001	203.845	1.8285	2.8909e-10	2.5356e-09
PGSC0003DMG400000777	1453.24	27.0742	5.7462	2.9906e-10	2.6183e-09
PGSC0003DMG400028959	70.4128	2.02903	5.117	2.9995e-10	2.6252e-09
PGSC0003DMG402003112	520.169	137.12	1.9235	3.0623e-10	2.6786e-09
PGSC0003DMG400002156	27437	1024.93	4.7425	3.079e-10	2.6924e-09
PGSC0003DMG402024557	363.912	30.9108	3.5574	3.085e-10	2.6968e-09
PGSC0003DMG401023644	2218.9	565.795	1.9715	3.1539e-10	2.7546e-09
PGSC0003DMG400019789	1585.07	275.409	2.5249	3.221e-10	2.808e-09
PGSC0003DMG400022492	114.835	1.90763	5.9116	3.3144e-10	2.8877e-09
PGSC0003DMG402019416	414.461	102.086	2.0215	3.3671e-10	2.931e-09
PGSC0003DMG400028583	572.95	120.658	2.2475	3.3863e-10	2.9468e-09
PGSC0003DMG400007258	539.454	136.877	1.9786	3.4567e-10	3.0023e-09
PGSC0003DMG400013685	849.866	252.358	1.7518	3.5158e-10	3.0503e-09
PGSC0003DMG400009724	86.8662	0.38064	7.8342	3.5562e-10	3.0821e-09
PGSC0003DMG400003509	2460.57	158.12	3.9599	3.5745e-10	3.0957e-09
PGSC0003DMG402023841	2952.93	18.2557	7.3377	3.5861e-10	3.1048e-09
Novel01105	2267.48	723.883	1.6473	3.6425e-10	3.1498e-09
PGSC0003DMG400030703	1559.15	495.62	1.6534	3.7007e-10	3.1982e-09
PGSC0003DMG400001560	434.689	106.712	2.0263	3.7103e-10	3.2046e-09
PGSC0003DMG400030411	861.017	254.525	1.7582	3.7157e-10	3.2083e-09
PGSC0003DMG400010788	3045.53	988.498	1.6234	3.7595e-10	3.2432e-09
PGSC0003DMG402009727	1027.87	211.725	2.2794	3.8501e-10	3.3204e-09
PGSC0003DMG400026381	331.046	6.48639	5.6735	3.9725e-10	3.4239e-09
PGSC0003DMG400015015	991.711	251.231	1.9809	3.986e-10	3.4341e-09
PGSC0003DMG400008242	47.298	0	Inf	3.9868e-10	3.4341e-09
PGSC0003DMG400029591	3932.53	121.196	5.02	4.0112e-10	3.4541e-09
Novel01359	73.7306	3.1825	4.534	4.017e-10	3.457e-09
PGSC0003DMG401011368	584.49	157.278	1.8939	4.0528e-10	3.4858e-09
Novel02859	2745.42	823.579	1.737	4.0623e-10	3.4929e-09
PGSC0003DMG400029050	131.722	13.9104	3.2433	4.1764e-10	3.5878e-09
PGSC0003DMG400004853	1999.23	656.98	1.6055	4.1928e-10	3.5998e-09
PGSC0003DMG400013938	216.9	25.7422	3.0748	4.1983e-10	3.6034e-09
PGSC0003DMG400000530	56.7951	0.827752	6.1004	4.2948e-10	3.6829e-09
PGSC0003DMG400001402	101.315	2.10262	5.5905	4.3092e-10	3.6931e-09
Novel01067	46.84	0	Inf	4.3685e-10	3.7428e-09
PGSC0003DMG401028586	2593.93	853.083	1.6044	4.3935e-10	3.7631e-09
PGSC0003DMG403030312	3177.89	666.907	2.2525	4.3964e-10	3.764e-09
PGSC0003DMG400017652	689.647	190.902	1.853	4.4088e-10	3.7717e-09
PGSC0003DMG400010794	3932.01	1325.03	1.5692	4.4867e-10	3.8362e-09
Novel00428	85.8954	4.50074	4.2543	4.5211e-10	3.8644e-09
PGSC0003DMG400018291	470.903	121.541	1.954	4.6125e-10	3.9401e-09
PGSC0003DMG402028319	753.535	218.724	1.7846	4.6232e-10	3.9481e-09
PGSC0003DMG400011332	387.942	12.5744	4.9473	4.6735e-10	3.9887e-09
PGSC0003DMG401030515	520.24	23.1326	4.4912	4.6815e-10	3.9944e-09
PGSC0003DMG400017317	106.045	8.63017	3.6191	4.7048e-10	4.0131e-09
PGSC0003DMG400034369	3631.31	1200.99	1.5963	4.7299e-10	4.0321e-09
PGSC0003DMG401007955	119.342	11.6913	3.3516	4.7912e-10	4.0819e-09
PGSC0003DMG400030455	250.118	48.7436	2.3593	4.7933e-10	4.0825e-09
PGSC0003DMG400011254	1125.37	70.2911	4.0009	4.8274e-10	4.1104e-09
PGSC0003DMG400009913	121.779	1.52478	6.3195	4.8843e-10	4.1551e-09
PGSC0003DMG400026457	90.6316	1.01341	6.4827	5.0094e-10	4.254e-09
PGSC0003DMG400022703	1251.44	388.722	1.6868	5.1308e-10	4.352e-09
PGSC0003DMG400017627	450.893	112.582	2.0018	5.1903e-10	4.3985e-09
PGSC0003DMG400001524	4909.03	1678.54	1.5482	5.1977e-10	4.4023e-09
PGSC0003DMG400029934	63.0942	0.697024	6.5002	5.2078e-10	4.4095e-09
PGSC0003DMG400006160	1016.72	114.033	3.1564	5.24e-10	4.4355e-09
PGSC0003DMG400020158	2733.13	897.397	1.6067	5.263e-10	4.4536e-09
PGSC0003DMG400010126	1477.74	464.327	1.6702	5.323e-10	4.4991e-09
PGSC0003DMG400027384	6612.38	2211.2	1.5803	5.3344e-10	4.5074e-09
PGSC0003DMG402030815	4908.99	1655.89	1.5678	5.4101e-10	4.5701e-09
PGSC0003DMG400032195	155.067	22.0621	2.8132	5.4465e-10	4.5994e-09
PGSC0003DMG400012613	2082.36	675.999	1.6231	5.4654e-10	4.6141e-09
PGSC0003DMG400019283	656.518	74.1602	3.1461	5.4955e-10	4.6367e-09
PGSC0003DMG400030832	4434.97	1471.69	1.5914	5.5e-10	4.6392e-09
PGSC0003DMG400021709	328.056	73.4485	2.1591	5.5209e-10	4.6555e-09
PGSC0003DMG400008707	562.842	85.5071	2.7186	5.6666e-10	4.7741e-09
PGSC0003DMG402030499	2012.6	658.496	1.6118	5.6993e-10	4.7975e-09
PGSC0003DMG400010454	8807.66	2123.57	2.0523	5.7194e-10	4.813e-09
PGSC0003DMG400004593	1407.35	441.498	1.6725	5.7254e-10	4.8166e-09
PGSC0003DMG400011902	46.1591	0	Inf	5.7694e-10	4.8522e-09
PGSC0003DMG400020623	20398.5	4246.93	2.264	5.7717e-10	4.8528e-09
PGSC0003DMG400023566	8182.84	2847.28	1.523	5.8314e-10	4.9016e-09
PGSC0003DMG400030577	2257.12	727.979	1.6325	5.8634e-10	4.9256e-09
PGSC0003DMG400017346	486.937	128.15	1.9259	5.9179e-10	4.967e-09
PGSC0003DMG400026078	1257.69	390.658	1.6868	5.9798e-10	5.0116e-09
PGSC0003DMG400002796	1780.72	590.379	1.5927	6.0025e-10	5.0292e-09
PGSC0003DMG400001435	797.812	230.151	1.7935	6.0595e-10	5.0741e-09
PGSC0003DMG400008308	2901.96	30.4792	6.5731	6.381e-10	5.3324e-09
PGSC0003DMG400012931	1230.16	388.279	1.6637	6.4574e-10	5.3947e-09
PGSC0003DMG400024273	62.0189	1.46052	5.4082	6.4998e-10	5.4286e-09
PGSC0003DMG400029753	6464.66	2228.06	1.5368	6.5911e-10	5.5016e-09
PGSC0003DMG400006940	305.529	65.4328	2.2232	6.601e-10	5.5083e-09
PGSC0003DMG400030698	314.57	70.2367	2.1631	6.606e-10	5.5108e-09
PGSC0003DMG400028145	260.032	52.3728	2.3118	6.667e-10	5.5602e-09
PGSC0003DMG400012774	147.204	0.697024	7.7224	6.7241e-10	5.6061e-09
PGSC0003DMG400018433	1150.14	355.535	1.6938	6.9661e-10	5.8012e-09
PGSC0003DMG402022737	7209.83	2408.88	1.5816	7.0897e-10	5.899e-09
Novel01647	75.2521	3.10669	4.5983	7.1134e-10	5.917e-09
PGSC0003DMG400015529	1159.01	348.003	1.7357	7.1624e-10	5.9544e-09
PGSC0003DMG400012340	460.918	108.797	2.0829	7.195e-10	5.978e-09
PGSC0003DMG400013347	199.313	34.2709	2.54	7.1994e-10	5.9799e-09
PGSC0003DMG400031068	2378.58	790.902	1.5885	7.2902e-10	6.0518e-09
PGSC0003DMG400013339	1529.22	492.376	1.635	7.4304e-10	6.1558e-09
PGSC0003DMG400022152	440.414	103.015	2.096	7.5809e-10	6.2733e-09
Novel00545	221.975	41.1357	2.4319	7.6464e-10	6.3257e-09
PGSC0003DMG400023260	452.566	120.639	1.9074	7.717e-10	6.3805e-09
PGSC0003DMG400021944	130.726	11.7644	3.474	7.7201e-10	6.3812e-09
PGSC0003DMG400006668	540.455	79.471	2.7657	7.8645e-10	6.4968e-09
Novel01295	76.8289	0.447113	7.4249	7.8868e-10	6.5134e-09
PGSC0003DMG400025122	262.791	54.4209	2.2717	7.9045e-10	6.5261e-09
Novel01246	1570.91	43.0983	5.1878	7.9342e-10	6.5488e-09
PGSC0003DMG400012458	140.824	17.602	3.0001	7.9902e-10	6.5931e-09
PGSC0003DMG401014605	147.983	20.5373	2.8491	8.1723e-10	6.7414e-09
PGSC0003DMG400011273	399.63	102.517	1.9628	8.4229e-10	6.9363e-09
PGSC0003DMG400014379	475.346	125.754	1.9184	8.5601e-10	7.0432e-09
PGSC0003DMG400011558	336.093	76.7328	2.1309	8.6266e-10	7.0938e-09
PGSC0003DMG400025385	3272.64	1100.8	1.5719	8.8498e-10	7.2733e-09
PGSC0003DMG400026113	902.317	83.414	3.4353	8.9352e-10	7.3393e-09
PGSC0003DMG400010661	5525.25	982.001	2.4922	9.16e-10	7.5124e-09
PGSC0003DMG400018665	2669.68	802.245	1.7346	9.1616e-10	7.5124e-09
PGSC0003DMG400022149	1344.17	424.182	1.664	9.178e-10	7.5222e-09
PGSC0003DMG400022932	1215.92	377.693	1.6868	9.2337e-10	7.5608e-09
PGSC0003DMG400000124	307.445	9.80405	4.9708	9.289e-10	7.6017e-09
PGSC0003DMG400010682	602.275	165.077	1.8673	9.334e-10	7.6342e-09
PGSC0003DMG400009004	4340.14	498.746	3.1214	9.6489e-10	7.8828e-09
PGSC0003DMG400020828	658.872	129.729	2.3445	9.8485e-10	8.0368e-09
Novel01978	5929.5	1683.58	1.8164	9.8663e-10	8.049e-09
PGSC0003DMG400024779	169.033	25.4005	2.7344	9.9431e-10	8.1094e-09
PGSC0003DMG400008141	759.312	223.378	1.7652	1.0003e-09	8.1562e-09
Novel03607	150.419	19.7259	2.9308	1.0042e-09	8.1854e-09
PGSC0003DMG400001980	1287.3	406.315	1.6637	1.0146e-09	8.2677e-09
Novel02273	931.781	55.4587	4.0705	1.0149e-09	8.2679e-09
PGSC0003DMG400029325	265.384	47.1702	2.4921	1.0263e-09	8.3537e-09
PGSC0003DMG400028152	648.892	38.2267	4.0853	1.0337e-09	8.4114e-09
PGSC0003DMG400030158	3550.42	1224.81	1.5354	1.0455e-09	8.5049e-09
Novel03087	60.1269	1.4583	5.3656	1.0489e-09	8.5302e-09
PGSC0003DMG400016655	743.779	216.499	1.7805	1.0529e-09	8.5582e-09
PGSC0003DMG401025557	582.145	161.733	1.8478	1.0575e-09	8.5932e-09
PGSC0003DMG400002791	54.5202	0.632767	6.429	1.1e-09	8.9336e-09
PGSC0003DMG402028902	61.4017	1.4583	5.3959	1.1041e-09	8.9646e-09
PGSC0003DMG400016607	633.095	180.923	1.807	1.1205e-09	9.0947e-09
PGSC0003DMG400032556	529.006	127.257	2.0555	1.1438e-09	9.2785e-09
PGSC0003DMG400010781	1445.97	458.588	1.6568	1.161e-09	9.4052e-09
PGSC0003DMG400017168	596.296	162.945	1.8716	1.1619e-09	9.4098e-09
PGSC0003DMG400014473	163.756	24.0818	2.7655	1.1742e-09	9.4987e-09
PGSC0003DMG400008122	3617.92	780.58	2.2125	1.1883e-09	9.6029e-09
PGSC0003DMG400001410	1794.89	588.74	1.6082	1.1992e-09	9.6815e-09
PGSC0003DMG400008029	2453.74	836.669	1.5523	1.2389e-09	9.9885e-09
PGSC0003DMG400012994	552.804	109.293	2.3386	1.2413e-09	1.0005e-08
Novel01580	549.059	153.745	1.8364	1.2488e-09	1.006e-08
Novel02584	174.019	28.5512	2.6076	1.2645e-09	1.0184e-08
PGSC0003DMG400014594	137.138	16.8868	3.0217	1.3225e-09	1.0635e-08
PGSC0003DMG400022233	324.495	74.2261	2.1282	1.3231e-09	1.0637e-08
PGSC0003DMG400005808	97.1916	8.27041	3.5548	1.3453e-09	1.0813e-08
PGSC0003DMG400029329	1335.17	422.059	1.6615	1.358e-09	1.0912e-08
PGSC0003DMG400030628	4663.9	1521.76	1.6158	1.3708e-09	1.1005e-08
PGSC0003DMG400007634	1276.82	411.482	1.6336	1.3743e-09	1.103e-08
PGSC0003DMG400005019	1061.49	335.281	1.6627	1.3782e-09	1.1059e-08
PGSC0003DMG400027699	391.742	96.7078	2.0182	1.3853e-09	1.1113e-08
PGSC0003DMG400003345	168.03	3.04734	5.785	1.4319e-09	1.1471e-08
PGSC0003DMG400008163	563.646	42.0295	3.7453	1.4337e-09	1.1482e-08
PGSC0003DMG400012143	121.475	1.71043	6.1502	1.4692e-09	1.1763e-08
Novel03393	120.207	0.316384	8.5696	1.4953e-09	1.1968e-08
PGSC0003DMG400022222	261.596	55.624	2.2336	1.5e-09	1.2e-08
Novel02473	51.8793	0.447113	6.8584	1.5022e-09	1.2014e-08
PGSC0003DMG400013443	1107.04	41.7031	4.7304	1.5032e-09	1.2018e-08
PGSC0003DMG400031347	2983.99	1020.49	1.548	1.5072e-09	1.2047e-08
PGSC0003DMG400001565	2421.62	461.496	2.3916	1.5097e-09	1.2061e-08
PGSC0003DMG400011740	50628.8	5647.05	3.1644	1.5331e-09	1.224e-08
PGSC0003DMG401006099	113.65	11.2282	3.3394	1.5339e-09	1.2243e-08
PGSC0003DMG400022743	114.665	12.4021	3.2088	1.5653e-09	1.248e-08
PGSC0003DMG400022618	1126.13	296.512	1.9252	1.5694e-09	1.251e-08
PGSC0003DMG400014274	1760.15	580.059	1.6014	1.5891e-09	1.2656e-08
PGSC0003DMG400023335	6186.1	2165.58	1.5143	1.6196e-09	1.2885e-08
PGSC0003DMG400011189	12736.7	1921.9	2.7284	1.6254e-09	1.2917e-08
PGSC0003DMG400021519	156.401	0.447113	8.4504	1.6494e-09	1.3097e-08
PGSC0003DMG400017160	1894.13	616.401	1.6196	1.6623e-09	1.3181e-08
PGSC0003DMG400020401	227.526	44.9744	2.3389	1.724e-09	1.3659e-08
PGSC0003DMG400000302	4738.42	1648.94	1.5229	1.7502e-09	1.3859e-08
PGSC0003DMG400013282	915.183	35.1618	4.702	1.7636e-09	1.3953e-08
PGSC0003DMG400021614	814.595	251.687	1.6945	1.7683e-09	1.3987e-08
PGSC0003DMG400018657	2114.27	695.219	1.6046	1.7692e-09	1.399e-08
PGSC0003DMG400017387	3503.59	1219.33	1.5227	1.8447e-09	1.4567e-08
PGSC0003DMG400028113	345.624	24.1961	3.8364	1.8534e-09	1.4632e-08
PGSC0003DMG400027692	1147.1	328.588	1.8036	1.8694e-09	1.4746e-08
PGSC0003DMG400001719	70.9858	3.89328	4.1885	1.9251e-09	1.5156e-08
Novel03252	573.808	37.4388	3.938	1.9291e-09	1.5184e-08
PGSC0003DMG400026456	13350.8	2199.18	2.6019	1.9621e-09	1.5431e-08
PGSC0003DMG400002943	180.502	1.27487	7.1455	1.9891e-09	1.5631e-08
PGSC0003DMG400004609	1032.04	261.503	1.9806	2.0538e-09	1.6117e-08
Novel03041	1073.79	347.299	1.6285	2.1031e-09	1.6495e-08
PGSC0003DMG400012984	750.453	229.248	1.7109	2.1043e-09	1.65e-08
PGSC0003DMG400011880	1235.13	395.612	1.6425	2.1096e-09	1.6537e-08
PGSC0003DMG401031172	90.9273	6.41281	3.8257	2.1416e-09	1.6765e-08
PGSC0003DMG400010772	1177.59	383.656	1.6179	2.143e-09	1.6772e-08
PGSC0003DMG400014140	2304.04	775.503	1.571	2.1617e-09	1.6908e-08
PGSC0003DMG400009078	134.73	17.5316	2.942	2.219e-09	1.7333e-08
PGSC0003DMG400001408	2935.19	801.425	1.8728	2.2272e-09	1.7388e-08
Novel00189	4621.74	1105.7	2.0635	2.2285e-09	1.7393e-08
PGSC0003DMG400030165	700.281	30.3634	4.5275	2.2411e-09	1.7487e-08
Novel00588	4084.57	1423.39	1.5209	2.2768e-09	1.776e-08
PGSC0003DMG400026627	3329.17	845.387	1.9775	2.2809e-09	1.7788e-08
PGSC0003DMG400008447	126.186	15.9696	2.9821	2.2981e-09	1.7917e-08
PGSC0003DMG400017519	636.928	183.011	1.7992	2.3339e-09	1.8187e-08
PGSC0003DMG402029598	192.315	35.4182	2.4409	2.3862e-09	1.8554e-08
PGSC0003DMG400009985	882.377	36.4378	4.5979	2.3948e-09	1.8611e-08
PGSC0003DMG400033685	3805.05	1315.06	1.5328	2.421e-09	1.8806e-08
PGSC0003DMG400028998	1076.13	341.683	1.6551	2.443e-09	1.8965e-08
PGSC0003DMG400017943	108.88	11.0403	3.3019	2.4582e-09	1.9078e-08
Novel01399	1605.6	84.0088	4.2564	2.4602e-09	1.9088e-08
PGSC0003DMG400004972	199.529	36.7471	2.4409	2.4826e-09	1.9251e-08
PGSC0003DMG400010518	798.971	250.852	1.6713	2.5772e-09	1.9969e-08
PGSC0003DMG400008256	1359.14	444.033	1.614	2.594e-09	2.0088e-08
PGSC0003DMG400009956	1732.21	587.17	1.5608	2.6458e-09	2.0484e-08
PGSC0003DMG400010472	619.434	175.435	1.82	2.6889e-09	2.0784e-08
Novel02975	1603.19	46.8179	5.0977	2.6983e-09	2.0851e-08
PGSC0003DMG400004742	572.74	162.834	1.8145	2.7001e-09	2.086e-08
Novel00815	123.197	15.3213	3.0074	2.7142e-09	2.0963e-08
PGSC0003DMG400024040	3398.01	1194.9	1.5078	2.7458e-09	2.1196e-08
PGSC0003DMG400022409	1967.29	654.152	1.5885	2.7489e-09	2.1214e-08
PGSC0003DMG400009186	86.1982	5.77561	3.8996	2.8099e-09	2.1661e-08
PGSC0003DMG400019483	57.536	1.58903	5.1782	2.8166e-09	2.1707e-08
PGSC0003DMG400000812	880.837	270.775	1.7018	2.8176e-09	2.1709e-08
PGSC0003DMG400024653	971.839	311.184	1.6429	2.8229e-09	2.1738e-08
PGSC0003DMG400007505	237.995	45.743	2.3793	2.8262e-09	2.1752e-08
PGSC0003DMG401003517	42.8895	0	Inf	2.878e-09	2.2127e-08
PGSC0003DMG400016018	1530.17	365.567	2.0655	2.8895e-09	2.2204e-08
Novel03281	404.388	104.803	1.9481	2.8998e-09	2.2271e-08
PGSC0003DMG400019266	2067.68	568.013	1.864	2.9326e-09	2.2511e-08
PGSC0003DMG402004716	128.849	11.561	3.4783	2.9449e-09	2.2587e-08
PGSC0003DMG400015477	1168.2	42.6606	4.7752	2.9692e-09	2.2761e-08
PGSC0003DMG400011337	375.831	98.6682	1.9294	2.9778e-09	2.2822e-08
PGSC0003DMG400000776	33447.1	1293.65	4.6924	2.9803e-09	2.2834e-08
PGSC0003DMG400026628	43.0423	0	Inf	2.9981e-09	2.2959e-08
PGSC0003DMG400028364	448.079	118.949	1.9134	3.0227e-09	2.3129e-08
Novel01676	248.218	4.19369	5.8872	3.0282e-09	2.3158e-08
PGSC0003DMG400008211	161.332	26.4414	2.6092	3.0476e-09	2.3288e-08
PGSC0003DMG400013779	28446.1	10540.1	1.4323	3.0494e-09	2.3296e-08
PGSC0003DMG400047233	338.249	83.19	2.0236	3.0561e-09	2.3341e-08
PGSC0003DMG400021456	821.43	253.201	1.6979	3.0972e-09	2.3636e-08
PGSC0003DMG400022402	370.113	60.618	2.6101	3.153e-09	2.4043e-08
PGSC0003DMG400032249	102.901	0	Inf	3.1549e-09	2.4051e-08
PGSC0003DMG402010071	125.238	15.9581	2.9723	3.1584e-09	2.4065e-08
PGSC0003DMG400012900	1415.82	472.278	1.5839	3.161e-09	2.4078e-08
PGSC0003DMG400007519	501.039	122.293	2.0346	3.1765e-09	2.419e-08
PGSC0003DMG401003899	1439.76	479.398	1.5865	3.1903e-09	2.4282e-08
PGSC0003DMG400029636	6815.16	2079.2	1.7127	3.2685e-09	2.4864e-08
PGSC0003DMG400012201	713.869	116.811	2.6115	3.3004e-09	2.51e-08
PGSC0003DMG400016286	199.309	37.4862	2.4106	3.3066e-09	2.5141e-08
PGSC0003DMG401024041	339.803	84.67	2.0048	3.3357e-09	2.5356e-08
PGSC0003DMG400005895	892.967	284.246	1.6515	3.3705e-09	2.5606e-08
PGSC0003DMG402021564	9903.39	1448.81	2.7731	3.4027e-09	2.5844e-08
PGSC0003DMG400030131	95.8099	8.65992	3.4678	3.4564e-09	2.6218e-08
PGSC0003DMG400032257	2778.33	978.956	1.5049	3.4873e-09	2.6445e-08
PGSC0003DMG400024063	1984.77	427.62	2.2146	3.492e-09	2.6474e-08
PGSC0003DMG400016870	4292.54	1530.05	1.4883	3.5573e-09	2.6941e-08
PGSC0003DMG400012571	984.14	315.09	1.6431	3.6161e-09	2.7342e-08
PGSC0003DMG400020348	42.4918	0	Inf	3.6662e-09	2.7692e-08
PGSC0003DMG400003805	7631.97	1503.61	2.3436	3.6794e-09	2.7785e-08
PGSC0003DMG400032503	163.433	26.1862	2.6418	3.7411e-09	2.8228e-08
PGSC0003DMG400021807	597.95	168.522	1.8271	3.7927e-09	2.861e-08
Novel02244	1719.59	342.183	2.3292	3.8783e-09	2.9233e-08
PGSC0003DMG400010509	706.217	101.126	2.804	3.8803e-09	2.9241e-08
PGSC0003DMG400009154	3388.5	1204.26	1.4925	3.9574e-09	2.9814e-08
PGSC0003DMG400016313	273.07	14.8348	4.2022	3.972e-09	2.9916e-08
PGSC0003DMG400014504	504.919	145.002	1.8	3.9802e-09	2.997e-08
PGSC0003DMG402023929	2118.07	722.767	1.5511	4.0084e-09	3.0175e-08
PGSC0003DMG400012238	9210.44	3381.93	1.4454	4.0132e-09	3.0202e-08
PGSC0003DMG400016526	65.4992	1.64617	5.3143	4.0151e-09	3.0205e-08
PGSC0003DMG400025254	422.093	113.163	1.8992	4.0224e-09	3.0249e-08
PGSC0003DMG400028336	835.187	262.412	1.6703	4.0493e-09	3.0434e-08
PGSC0003DMG400023590	8388.56	1521.44	2.463	4.0512e-09	3.0441e-08
PGSC0003DMG400028180	1428.4	260.167	2.4569	4.0861e-09	3.0687e-08
PGSC0003DMG400027163	41.733	0	Inf	4.2053e-09	3.1558e-08
Novel00424	170.732	29.7613	2.5202	4.2244e-09	3.1693e-08
PGSC0003DMG400029322	3129.15	1111.29	1.4935	4.2493e-09	3.1863e-08
PGSC0003DMG400012593	269.708	58.5878	2.2027	4.2553e-09	3.1892e-08
PGSC0003DMG400005931	49947	6815.92	2.8734	4.2734e-09	3.2019e-08
PGSC0003DMG400003924	413.834	111.526	1.8917	4.3012e-09	3.2211e-08
PGSC0003DMG400015448	358.67	90.907	1.9802	4.3712e-09	3.2726e-08
PGSC0003DMG400001338	166.952	28.2848	2.5613	4.4246e-09	3.3108e-08
PGSC0003DMG400023788	125.536	14.6128	3.1028	4.4442e-09	3.324e-08
PGSC0003DMG400001233	3184.02	901.065	1.8211	4.576e-09	3.418e-08
PGSC0003DMG400025078	1565.32	542.446	1.5289	4.5804e-09	3.4204e-08
PGSC0003DMG400017560	98.544	9.27005	3.4101	4.6344e-09	3.458e-08
PGSC0003DMG400008610	120.517	0.316384	8.5733	4.6519e-09	3.4702e-08
PGSC0003DMG400023240	409.744	108.358	1.9189	4.6761e-09	3.4873e-08
PGSC0003DMG400000214	2673.88	951.548	1.4906	4.6947e-09	3.5003e-08
Novel01932	323.75	78.2358	2.049	4.7038e-09	3.5061e-08
PGSC0003DMG400007409	307.563	73.6869	2.0614	4.7468e-09	3.5364e-08
PGSC0003DMG402027116	41.0284	0	Inf	4.7808e-09	3.5599e-08
PGSC0003DMG400022368	2913.44	646.509	2.172	4.8297e-09	3.5944e-08
PGSC0003DMG400006589	281.313	3.3797	6.3791	4.8323e-09	3.5954e-08
PGSC0003DMG400021666	1639.59	143.879	3.5104	4.8702e-09	3.6218e-08
PGSC0003DMG400009790	188.477	36.6514	2.3624	4.9072e-09	3.6465e-08
Novel01806	413.305	112.726	1.8744	4.9323e-09	3.6632e-08
PGSC0003DMG400023663	305.247	74.1832	2.0408	4.9618e-09	3.6832e-08
PGSC0003DMG400018290	147.702	3.36372	5.4565	4.9769e-09	3.6935e-08
PGSC0003DMG400024802	971.374	199.791	2.2815	5.0583e-09	3.7519e-08
PGSC0003DMG400017533	701.13	220.469	1.6691	5.0631e-09	3.7545e-08
PGSC0003DMG400030615	455.026	122.011	1.8989	5.1505e-09	3.8174e-08
Novel01429	99.5971	9.97641	3.3195	5.2003e-09	3.8533e-08
PGSC0003DMG400006837	259.934	59.761	2.1209	5.2064e-09	3.8559e-08
PGSC0003DMG402001341	483.199	35.3163	3.7742	5.2414e-09	3.8808e-08
PGSC0003DMG400002989	4279.46	1526.33	1.4874	5.2466e-09	3.8837e-08
PGSC0003DMG400010228	440.248	121.973	1.8518	5.2876e-09	3.912e-08
PGSC0003DMG401016495	27984.7	1523.18	4.1995	5.2936e-09	3.9154e-08
PGSC0003DMG400023384	828.773	260.826	1.6679	5.3165e-09	3.9314e-08
PGSC0003DMG402013388	1105.88	59.1998	4.2235	5.3568e-09	3.9601e-08
PGSC0003DMG400013035	4642.84	1684.37	1.4628	5.428e-09	4.0087e-08
Novel02061	862.414	275.638	1.6456	5.503e-09	4.0611e-08
PGSC0003DMG400015661	150.266	21.376	2.8134	5.5167e-09	4.0699e-08
PGSC0003DMG400004746	388.792	102.789	1.9193	5.5824e-09	4.1164e-08
PGSC0003DMG400001368	841.918	271.397	1.6333	5.6894e-09	4.1899e-08
PGSC0003DMG400021554	357.07	91.3907	1.9661	5.7079e-09	4.2014e-08
PGSC0003DMG400031513	99.9457	1.07988	6.5322	5.7286e-09	4.2144e-08
PGSC0003DMG400010395	40.6781	0	Inf	5.7508e-09	4.2297e-08
PGSC0003DMG400004956	160.26	18.9961	3.0766	5.8257e-09	4.2783e-08
PGSC0003DMG400024120	360.529	7.88487	5.5149	5.9916e-09	4.3978e-08
PGSC0003DMG400007788	212.647	10.8657	4.2906	6.0027e-09	4.4049e-08
Novel01847	1539.36	530.102	1.538	6.0796e-09	4.4601e-08
Novel01443	921.735	292.974	1.6536	6.1502e-09	4.5074e-08
PGSC0003DMG400008151	935.176	311.721	1.585	6.1731e-09	4.5219e-08
PGSC0003DMG400027063	3889.88	1416.5	1.4574	6.2162e-09	4.5511e-08
PGSC0003DMG400002103	965.76	93.1267	3.3744	6.3953e-09	4.681e-08
PGSC0003DMG402016475	959.019	214.164	2.1628	6.4051e-09	4.6871e-08
PGSC0003DMG400022965	229.911	46.2758	2.3127	6.439e-09	4.7095e-08
PGSC0003DMG400019835	712.918	221.686	1.6852	6.5229e-09	4.7672e-08
PGSC0003DMG400000731	1042.42	340.059	1.6161	6.5483e-09	4.7845e-08
PGSC0003DMG400026946	557.54	163.155	1.7728	6.6204e-09	4.8348e-08
PGSC0003DMG400008201	90.4887	7.9447	3.5097	6.6649e-09	4.8661e-08
PGSC0003DMG400030413	78.8457	6.1931	3.6703	6.6788e-09	4.875e-08
PGSC0003DMG400030689	2029.76	407.08	2.3179	6.6955e-09	4.8846e-08
PGSC0003DMG400023731	152.064	22.7174	2.7428	6.698e-09	4.8853e-08
PGSC0003DMG400012322	7907.34	2910.02	1.4422	6.7368e-09	4.9123e-08
PGSC0003DMG400010353	89.8945	7.30482	3.6213	6.7634e-09	4.9292e-08
PGSC0003DMG400011236	946.1	215.234	2.1361	6.808e-09	4.9605e-08
PGSC0003DMG400026982	197.603	37.5956	2.394	6.8963e-09	5.021e-08
PGSC0003DMG400028371	1661.75	550.461	1.594	6.9289e-09	5.0435e-08
PGSC0003DMG400026360	4454	1641.86	1.4398	6.9311e-09	5.0438e-08
PGSC0003DMG400002898	948.262	77.6134	3.6109	6.9668e-09	5.0685e-08
PGSC0003DMG400023518	83.1681	1.39626	5.8964	6.9868e-09	5.0805e-08
PGSC0003DMG400030786	1321.09	448.23	1.5594	7.031e-09	5.1088e-08
PGSC0003DMG400012972	45.2978	0.447113	6.6627	7.0838e-09	5.1445e-08
PGSC0003DMG400002615	996.62	307.157	1.6981	7.1087e-09	5.1613e-08
PGSC0003DMG400013068	2040.09	729.338	1.484	7.2351e-09	5.25e-08
PGSC0003DMG400030439	3830.77	1375.03	1.4782	7.2363e-09	5.25e-08
PGSC0003DMG400010402	80.4697	2.16909	5.2133	7.2572e-09	5.2639e-08
PGSC0003DMG400022761	1825.05	644.478	1.5017	7.2771e-09	5.2743e-08
Novel00642	40.0234	0	Inf	7.2853e-09	5.2789e-08
PGSC0003DMG400022495	699.622	85.6559	3.03	7.3242e-09	5.3057e-08
PGSC0003DMG400004806	441.462	118.402	1.8986	7.3616e-09	5.3302e-08
PGSC0003DMG400017175	1326.37	154.55	3.1013	7.3765e-09	5.3396e-08
PGSC0003DMG400022607	8404.3	3070.39	1.4527	7.3795e-09	5.3404e-08
PGSC0003DMG402023631	1918.89	685.526	1.485	7.5784e-09	5.4816e-08
PGSC0003DMG400027249	1424.41	481.2	1.5657	7.6656e-09	5.5406e-08
PGSC0003DMG400000987	58.8341	0	Inf	7.7536e-09	5.6e-08
PGSC0003DMG400033090	2446.55	813.915	1.5878	7.7836e-09	5.6202e-08
PGSC0003DMG400003803	51.7312	1.07988	5.5821	7.8039e-09	5.632e-08
PGSC0003DMG402000722	3087.75	1104.98	1.4825	7.9841e-09	5.7563e-08
PGSC0003DMG400027496	1056.38	300.007	1.8161	8.0835e-09	5.8222e-08
PGSC0003DMG400008360	132.637	12.3125	3.4293	8.1987e-09	5.9007e-08
PGSC0003DMG400006919	815.02	260.186	1.6473	8.2133e-09	5.9083e-08
PGSC0003DMG400005048	974.567	323.521	1.5909	8.386e-09	6.028e-08
PGSC0003DMG400005653	432.941	122.088	1.8263	8.3976e-09	6.0335e-08
PGSC0003DMG400003309	2875.58	1037.01	1.4714	8.3978e-09	6.0335e-08
PGSC0003DMG400015462	635.879	195.024	1.7051	8.4869e-09	6.093e-08
PGSC0003DMG400023846	67.4495	1.96967	5.0978	8.5267e-09	6.117e-08
PGSC0003DMG400012124	1160.84	342.949	1.7591	8.7308e-09	6.2603e-08
PGSC0003DMG400017601	296.706	37.8961	2.9689	8.7359e-09	6.2623e-08
PGSC0003DMG400033906	383.291	76.8361	2.3186	8.757e-09	6.2759e-08
PGSC0003DMG400003952	1198.54	399.894	1.5836	8.8048e-09	6.3055e-08
PGSC0003DMG400042273	3031.61	694.979	2.125	8.8935e-09	6.3674e-08
PGSC0003DMG400026503	2903.05	668.186	2.1192	8.94e-09	6.3992e-08
PGSC0003DMG400021912	1449.76	27.4412	5.7233	8.9897e-09	6.4315e-08
PGSC0003DMG400009933	384.335	107.753	1.8346	9.0028e-09	6.4393e-08
PGSC0003DMG400022569	1256.01	425.537	1.5615	9.063e-09	6.477e-08
PGSC0003DMG400011781	1170.99	394.825	1.5684	9.1029e-09	6.5028e-08
Novel03516	1162.64	30.866	5.2352	9.1536e-09	6.5358e-08
PGSC0003DMG400027820	512.399	151.339	1.7595	9.1941e-09	6.5598e-08
PGSC0003DMG400003288	1273.05	382.918	1.7332	9.2803e-09	6.6181e-08
PGSC0003DMG400009233	39.2085	0	Inf	9.3296e-09	6.6515e-08
Novel01607	352.872	89.8083	1.9742	9.3321e-09	6.6517e-08
PGSC0003DMG401025083	2101.06	374.615	2.4876	9.434e-09	6.721e-08
PGSC0003DMG400010660	14463.9	5387.95	1.4247	9.6784e-09	6.89e-08
PGSC0003DMG400025429	180.816	3.51043	5.6867	9.7255e-09	6.9218e-08
PGSC0003DMG400004449	2749.21	1000.76	1.4579	9.7518e-09	6.9371e-08
PGSC0003DMG400022200	1385.39	423.985	1.7082	9.7731e-09	6.9506e-08
PGSC0003DMG400000591	190.955	3.48733	5.775	9.8599e-09	7.0088e-08
PGSC0003DMG402023626	40.0155	0	Inf	1.0141e-08	7.1997e-08
PGSC0003DMG400011701	300.135	75.9761	1.982	1.02e-08	7.2401e-08
PGSC0003DMG400009282	2684.11	521.438	2.3639	1.029e-08	7.302e-08
PGSC0003DMG400008876	173.648	0.632767	8.1003	1.0419e-08	7.3864e-08
PGSC0003DMG401007403	3818.46	1415.57	1.4316	1.0599e-08	7.5062e-08
PGSC0003DMG402001493	1044.24	351.7	1.57	1.0607e-08	7.5084e-08
PGSC0003DMG400027040	706.309	54.5799	3.6939	1.065e-08	7.5373e-08
PGSC0003DMG400030415	54.8817	1.46052	5.2318	1.0774e-08	7.6191e-08
PGSC0003DMG400003660	283.005	68.7218	2.042	1.1032e-08	7.7923e-08
PGSC0003DMG400024582	31581.2	11901.1	1.408	1.1038e-08	7.7943e-08
PGSC0003DMG400010428	410.249	114.04	1.847	1.1054e-08	7.8021e-08
PGSC0003DMG400012316	397.571	12.3334	5.0106	1.1156e-08	7.87e-08
PGSC0003DMG400002703	14370.9	5427.63	1.4048	1.1186e-08	7.8891e-08
PGSC0003DMG400009094	301.704	39.953	2.9168	1.1244e-08	7.9247e-08
PGSC0003DMG400019529	160.165	28.038	2.5141	1.1257e-08	7.9315e-08
PGSC0003DMG400015379	3298.53	1235.43	1.4168	1.1433e-08	8.05e-08
PGSC0003DMG400027906	4994.11	926.352	2.4306	1.1695e-08	8.226e-08
PGSC0003DMG400006462	10347.8	320.866	5.0112	1.1795e-08	8.2906e-08
PGSC0003DMG400025409	4701.98	1747.06	1.4283	1.1799e-08	8.2911e-08
PGSC0003DMG400023359	24463.9	1732.5	3.8197	1.1895e-08	8.3563e-08
PGSC0003DMG400028636	1848.46	652.977	1.5012	1.2028e-08	8.4482e-08
PGSC0003DMG400024619	1778.19	458.749	1.9546	1.2225e-08	8.5824e-08
PGSC0003DMG400004009	903.339	172.288	2.3904	1.2338e-08	8.6593e-08
PGSC0003DMG400002293	550.111	167.042	1.7195	1.2454e-08	8.7385e-08
PGSC0003DMG400005407	900.5	300.05	1.5855	1.2548e-08	8.8003e-08
PGSC0003DMG401008915	85.926	7.69479	3.4811	1.2569e-08	8.8126e-08
PGSC0003DMG400002678	243.63	57.0447	2.0945	1.2744e-08	8.9295e-08
PGSC0003DMG400012451	461.621	133.166	1.7935	1.2891e-08	9.0299e-08
PGSC0003DMG400007952	212.911	43.4123	2.2941	1.2915e-08	9.0445e-08
PGSC0003DMG400015835	58.7222	2.35253	4.6416	1.3022e-08	9.1172e-08
PGSC0003DMG400008676	2061.43	749.972	1.4587	1.3043e-08	9.128e-08
PGSC0003DMG400010869	768.308	120.87	2.6682	1.3044e-08	9.128e-08
PGSC0003DMG400024725	974.344	6.10575	7.3181	1.3232e-08	9.2521e-08
PGSC0003DMG400016159	569.068	179.497	1.6646	1.3274e-08	9.2779e-08
PGSC0003DMG400020999	82998.4	26398.2	1.6526	1.3308e-08	9.2995e-08
Novel01331	3460.84	942.301	1.8769	1.3356e-08	9.3309e-08
PGSC0003DMG400012569	145.337	25.0709	2.5353	1.3385e-08	9.349e-08
Novel00602	107.072	2.73317	5.2919	1.3581e-08	9.481e-08
PGSC0003DMG400025501	551.146	172.056	1.6796	1.36e-08	9.4914e-08
PGSC0003DMG400026976	471.825	24.9309	4.2422	1.3602e-08	9.4914e-08
PGSC0003DMG400011278	693.634	223.408	1.6345	1.3687e-08	9.5479e-08
PGSC0003DMG400025439	92.78	8.37583	3.4695	1.3993e-08	9.7519e-08
PGSC0003DMG400028234	7713.93	2950.93	1.3863	1.4418e-08	1.0037e-07
PGSC0003DMG400024979	802.235	226.023	1.8276	1.4419e-08	1.0037e-07
PGSC0003DMG400029288	392.057	49.975	2.9718	1.448e-08	1.0074e-07
PGSC0003DMG400013815	657.763	204.396	1.6862	1.4639e-08	1.0182e-07
PGSC0003DMG400008124	48.973	0.447113	6.7752	1.4782e-08	1.0274e-07
Novel03255	1563.24	393.612	1.9897	1.4991e-08	1.0413e-07
PGSC0003DMG400031752	811.301	269.986	1.5874	1.5044e-08	1.0447e-07
PGSC0003DMG400028301	107.223	12.2664	3.1278	1.5048e-08	1.0447e-07
PGSC0003DMG400031071	5192.9	1835.24	1.5006	1.5302e-08	1.0611e-07
PGSC0003DMG402021929	140.235	22.8827	2.6155	1.5398e-08	1.0674e-07
PGSC0003DMG400031793	1078.6	325.297	1.7293	1.557e-08	1.0785e-07
PGSC0003DMG400001646	901.498	264.213	1.7706	1.5572e-08	1.0785e-07
PGSC0003DMG402028101	1668.07	234.121	2.8329	1.5573e-08	1.0785e-07
Novel02831	400.001	110.997	1.8495	1.5636e-08	1.0826e-07
PGSC0003DMG400013856	18249.7	2087.82	3.1278	1.5647e-08	1.0832e-07
PGSC0003DMG400025959	154.178	28.9704	2.4119	1.5714e-08	1.0875e-07
PGSC0003DMG400012133	360.794	93.4843	1.9484	1.5837e-08	1.0958e-07
PGSC0003DMG400010017	267.449	57.9977	2.2052	1.5938e-08	1.1025e-07
PGSC0003DMG400025161	618.987	166.533	1.8941	1.6075e-08	1.1115e-07
PGSC0003DMG400035559	451.412	129.232	1.8045	1.6515e-08	1.1405e-07
PGSC0003DMG400015927	1803.2	635.196	1.5053	1.6528e-08	1.1411e-07
PGSC0003DMG400030454	133.812	20.5945	2.6999	1.6556e-08	1.1428e-07
PGSC0003DMG400005602	647.348	207.454	1.6417	1.6585e-08	1.1445e-07
PGSC0003DMG400007797	6346	2355.15	1.43	1.6784e-08	1.1575e-07
PGSC0003DMG400025492	284.477	68.155	2.0614	1.692e-08	1.166e-07
PGSC0003DMG400021142	133885	14466.6	3.2102	1.7588e-08	1.2103e-07
PGSC0003DMG400028393	1169.44	390.24	1.5834	1.7615e-08	1.2118e-07
PGSC0003DMG400021347	1040.26	361.592	1.5245	1.79e-08	1.2305e-07
PGSC0003DMG400017198	464.176	48.7893	3.25	1.7957e-08	1.2342e-07
PGSC0003DMG400028925	1827.1	658.434	1.4724	1.8275e-08	1.2549e-07
PGSC0003DMG400015933	586.3	182.005	1.6877	1.8396e-08	1.2629e-07
PGSC0003DMG400002171	46.9198	0.76128	5.9456	1.8576e-08	1.2737e-07
PGSC0003DMG400004437	894.033	304.963	1.5517	1.8772e-08	1.2862e-07
PGSC0003DMG400007488	1612.6	583.884	1.4656	1.8797e-08	1.2876e-07
PGSC0003DMG400002327	95.7411	9.58376	3.3205	1.8921e-08	1.2958e-07
PGSC0003DMG400013362	1830.84	450.044	2.0244	1.8989e-08	1.2998e-07
PGSC0003DMG400026129	2174.78	797.316	1.4476	1.8993e-08	1.2998e-07
PGSC0003DMG400031764	327.719	88.0157	1.8966	1.9109e-08	1.3069e-07
PGSC0003DMG400022063	408.326	19.2186	4.4091	1.9111e-08	1.3069e-07
PGSC0003DMG400007911	2036.36	738.829	1.4627	1.9274e-08	1.3175e-07
PGSC0003DMG400031111	1284.72	451.471	1.5087	1.9308e-08	1.3195e-07
PGSC0003DMG400025081	779.422	251.151	1.6339	1.9646e-08	1.3416e-07
PGSC0003DMG400043451	547.982	167.785	1.7075	1.9774e-08	1.3494e-07
PGSC0003DMG400009901	777.515	257.369	1.595	1.9797e-08	1.3506e-07
Novel00350	57.0673	1.83894	4.9557	1.9952e-08	1.3602e-07
PGSC0003DMG400020071	3741.92	1395.06	1.4235	2.0051e-08	1.3667e-07
PGSC0003DMG400019231	62.7486	0	Inf	2.0142e-08	1.3726e-07
PGSC0003DMG400027138	245.976	57.587	2.0947	2.0355e-08	1.3865e-07
PGSC0003DMG400011133	304.361	79.6544	1.934	2.0419e-08	1.3904e-07
PGSC0003DMG400030683	1841.9	447.835	2.0402	2.0549e-08	1.399e-07
PGSC0003DMG400005494	194.18	8.30889	4.5466	2.0857e-08	1.4183e-07
PGSC0003DMG400015442	207.689	24.1367	3.1051	2.0883e-08	1.4197e-07
PGSC0003DMG400005144	1300.45	462.386	1.4918	2.1021e-08	1.4285e-07
PGSC0003DMG400014322	49.2672	1.07766	5.5146	2.1071e-08	1.4315e-07
[truncated: 3,532 more rows]

## Sheet: X2_12_Down
TableS4 The down-regulated DEGs of X2 tuters at 12 h after cut-wounding
gene_id	12h_readcount	0h_readcount	log2FoldChange	pval	padj
PGSC0003DMG400021877	93.5035	10037.1	-6.7461	2.1201e-102	3.0571e-98
PGSC0003DMG400012631	42.2158	4129.83	-6.6122	6.749e-90	3.2439e-86
Novel01708	13.3687	1915.97	-7.1631	3.3499e-88	1.3801e-84
PGSC0003DMG400003984	6583.1	306857	-5.5427	6.4261e-80	1.6848e-76
PGSC0003DMG400028505	73.4183	3777.37	-5.6851	1.6953e-76	3.7608e-73
PGSC0003DMG400016842	792.504	29276.3	-5.2072	1.5628e-72	3.0047e-69
PGSC0003DMG400019106	40.0906	2192.91	-5.7734	7.678e-71	1.3025e-67
PGSC0003DMG400021891	1267.62	41720.7	-5.0406	4.0033e-70	6.4139e-67
PGSC0003DMG401020927	14.7053	1352.2	-6.5228	4.5387e-69	6.5445e-66
PGSC0003DMG400000364	3018.35	94231.6	-4.9644	8.2199e-69	1.0775e-65
Novel03642	1.71457	658.238	-8.5846	2.9753e-68	3.7306e-65
PGSC0003DMG400003863	2144.21	60979.6	-4.8298	3.9395e-65	4.2078e-62
PGSC0003DMG400030688	758.507	32622.9	-5.4266	1.732e-62	1.5136e-59
PGSC0003DMG400017957	414.761	10924.5	-4.7191	4.1361e-62	3.5083e-59
Novel03362	282.747	7386.77	-4.7074	5.7948e-61	4.3978e-58
Novel01823	73.3379	2471.82	-5.0749	4.8254e-59	3.2363e-56
PGSC0003DMG400009208	121.675	3417.41	-4.8118	4.3598e-58	2.7333e-55
PGSC0003DMG400023125	6.11784	626.371	-6.6779	1.9842e-57	1.2175e-54
PGSC0003DMG400023400	18388.8	365874	-4.3145	2.9494e-56	1.772e-53
PGSC0003DMG400008712	3842.93	79716.2	-4.3746	4.9498e-56	2.8549e-53
PGSC0003DMG400004662	1299.95	25557.4	-4.2972	1.4212e-55	7.7331e-53
PGSC0003DMG400006349	1334.31	25883.5	-4.2779	3.5133e-54	1.6736e-51
PGSC0003DMG400026938	1666.93	30969.2	-4.2156	3.54e-54	1.6736e-51
PGSC0003DMG400030513	653.835	12576.3	-4.2656	6.2994e-54	2.9301e-51
PGSC0003DMG400046756	2438.23	45085.5	-4.2088	1.9706e-53	9.0206e-51
PGSC0003DMG400019258	7479.77	137425	-4.1995	3.1829e-53	1.4342e-50
PGSC0003DMG400028791	1201.67	21112.6	-4.135	1.5395e-52	6.4345e-50
PGSC0003DMG400008145	1402.27	24651.3	-4.1358	1.6201e-51	6.1477e-49
PGSC0003DMG400019361	1051.89	18287.8	-4.1198	4.5106e-51	1.6677e-48
PGSC0003DMG400028094	5.63127	520.873	-6.5313	6.1869e-51	2.2303e-48
PGSC0003DMG400021056	1.05126	379.476	-8.4957	1.1424e-50	4.0675e-48
PGSC0003DMG400025502	1166.79	20066.4	-4.1042	1.4678e-50	5.162e-48
PGSC0003DMG400012110	4206.64	69998.4	-4.0566	1.7265e-50	5.999e-48
PGSC0003DMG400012664	50.3968	1372.91	-4.7678	2.3162e-50	7.952e-48
PGSC0003DMG400031761	1108.52	18175.1	-4.0353	5.1051e-50	1.7321e-47
PGSC0003DMG400000156	455.575	7876.56	-4.1118	8.6998e-50	2.8838e-47
PGSC0003DMG400019671	54.3763	1408.13	-4.6947	6.725e-49	2.1081e-46
PGSC0003DMG400014323	1838.37	28093.8	-3.9338	1.438e-48	4.4119e-46
PGSC0003DMG400002995	818.303	12784.3	-3.9656	7.0735e-48	2.0816e-45
PGSC0003DMG400008057	188.042	3396.36	-4.1749	1.6523e-47	4.7651e-45
PGSC0003DMG400000644	1389.73	21047.2	-3.9208	2.7729e-47	7.9175e-45
PGSC0003DMG400023146	2238.47	34174.1	-3.9323	5.6054e-47	1.5849e-44
PGSC0003DMG400021716	1881.77	30603	-4.0235	7.3313e-46	1.9221e-43
PGSC0003DMG400022432	3159.7	45573.5	-3.8503	1.1175e-45	2.8521e-43
Novel00899	384.358	5789.71	-3.913	1.202e-45	3.0408e-43
PGSC0003DMG400028257	120.371	2204.15	-4.1947	1.2213e-45	3.0627e-43
PGSC0003DMG400032243	197.274	3518.98	-4.1569	1.3812e-45	3.4044e-43
PGSC0003DMG400003649	25.123	790.445	-4.9756	1.4782e-45	3.6126e-43
PGSC0003DMG401029567	1982.23	27936.8	-3.817	2.6001e-45	6.1969e-43
PGSC0003DMG400017523	4722.49	62487	-3.7259	2.8579e-45	6.7556e-43
PGSC0003DMG402017944	107.624	1944.92	-4.1756	3.5225e-45	8.2589e-43
PGSC0003DMG400009044	1977.29	27104.6	-3.7769	6.7269e-45	1.5397e-42
PGSC0003DMG400007141	1171.5	16421.4	-3.8092	6.9674e-45	1.5821e-42
PGSC0003DMG400005151	914.271	13071.5	-3.8377	9.7133e-45	2.1715e-42
PGSC0003DMG400014507	569.761	7853.39	-3.7849	5.1427e-44	1.1236e-41
PGSC0003DMG401000056	1298.16	16975	-3.7089	9.3603e-44	2.0145e-41
PGSC0003DMG400017192	308.121	4492.87	-3.8661	1.2724e-43	2.6981e-41
PGSC0003DMG400003597	249.07	3783.89	-3.9252	1.8138e-43	3.8181e-41
PGSC0003DMG400014162	9.41633	481.177	-5.6753	2.0315e-43	4.2148e-41
PGSC0003DMG400033046	75.3884	1433.69	-4.2492	2.3605e-43	4.8625e-41
Novel00552	552.391	7272.59	-3.7187	2.4043e-43	4.9176e-41
PGSC0003DMG400007078	4748.81	59905.1	-3.657	3.0432e-43	6.1804e-41
PGSC0003DMG400030186	313.191	4653.97	-3.8933	3.2983e-43	6.6518e-41
PGSC0003DMG400012111	3080.32	39407.6	-3.6773	3.9408e-43	7.7313e-41
PGSC0003DMG400022171	3085.33	39422.5	-3.6755	4.333e-43	8.4432e-41
PGSC0003DMG400031139	755.592	9753.6	-3.6903	5.7247e-43	1.1006e-40
Novel02712	208.936	3199.67	-3.9368	6.1821e-43	1.1807e-40
PGSC0003DMG400029841	505.044	9514.71	-4.2357	9.4712e-43	1.7736e-40
PGSC0003DMG400019461	22.6221	683.609	-4.9174	1.0773e-42	2.0043e-40
Novel00564	809.543	10664.5	-3.7196	1.1091e-42	2.0503e-40
PGSC0003DMG400023521	1511.4	19107.4	-3.6602	1.377e-42	2.5293e-40
Novel02087	2756.47	34485.1	-3.6451	2.3865e-42	4.2224e-40
PGSC0003DMG400018104	1839.18	22132.3	-3.589	5.4845e-42	9.586e-40
PGSC0003DMG400024356	2108.99	26045.3	-3.6264	6.4086e-42	1.1067e-39
Novel02986	20.9532	631.027	-4.9125	7.3891e-42	1.2684e-39
PGSC0003DMG400012306	5503.7	68226.2	-3.6319	1.1863e-41	1.989e-39
PGSC0003DMG400023908	2301.28	28879.1	-3.6495	1.3013e-41	2.1567e-39
PGSC0003DMG400012049	5.21566	377.345	-6.1769	1.4265e-41	2.3508e-39
PGSC0003DMG400019208	21005.2	255438	-3.6042	3.2579e-41	5.2784e-39
Novel01052	1872.83	22364.5	-3.5779	6.5488e-41	1.0551e-38
Novel01563	721.579	9038.46	-3.6468	1.3233e-40	2.0968e-38
PGSC0003DMG401025958	1522.88	18614	-3.6115	2.1633e-40	3.4091e-38
PGSC0003DMG400030357	535.394	6465.4	-3.5941	2.5895e-40	4.0586e-38
PGSC0003DMG400028273	1574.48	18389.1	-3.5459	4.7452e-40	7.3574e-38
Novel01072	1223.19	14496.5	-3.567	5.212e-40	8.0379e-38
PGSC0003DMG400021191	2296.08	26967.8	-3.554	5.3748e-40	8.2449e-38
PGSC0003DMG400033134	233.482	3062.95	-3.7135	5.9925e-40	9.1437e-38
PGSC0003DMG400015238	3616.14	43129.4	-3.5761	6.8968e-40	1.0468e-37
PGSC0003DMG400011136	2738.56	30777.3	-3.4904	7.2217e-40	1.0904e-37
PGSC0003DMG400020572	30.5467	711.699	-4.5422	8.1268e-40	1.2207e-37
Novel02555	79.2099	1308.61	-4.0462	9.7839e-40	1.462e-37
PGSC0003DMG400026142	2880.31	32053.2	-3.4762	1.054e-39	1.5669e-37
PGSC0003DMG400011197	307.293	10133.1	-5.0433	1.1175e-39	1.6526e-37
Novel02459	3872.58	43886.7	-3.5024	1.5776e-39	2.3094e-37
PGSC0003DMG400026818	1699.91	19887.7	-3.5483	2.8149e-39	4.0388e-37
PGSC0003DMG400009125	880.163	10047.5	-3.5129	2.9843e-39	4.2606e-37
PGSC0003DMG400023837	3296.67	35624.4	-3.4338	4.0135e-39	5.6738e-37
PGSC0003DMG400015370	147.405	2054.31	-3.8008	4.2631e-39	5.9972e-37
PGSC0003DMG401031520	280.823	3373.55	-3.5865	4.3113e-39	6.0356e-37
PGSC0003DMG400017951	10.7828	444.164	-5.3643	4.3424e-39	6.0498e-37
PGSC0003DMG400029761	619.68	7254.94	-3.5494	5.8308e-39	8.0073e-37
PGSC0003DMG400024008	18146.4	200680	-3.4671	6.0245e-39	8.2341e-37
PGSC0003DMG400000104	2516.29	27754	-3.4633	6.2178e-39	8.4582e-37
PGSC0003DMG400001598	6837	73036.1	-3.4172	6.7688e-39	9.1646e-37
Novel01663	2439.88	26390.3	-3.4351	8.3449e-39	1.1246e-36
PGSC0003DMG400027943	2853.34	29978.7	-3.3932	1.0606e-38	1.4095e-36
PGSC0003DMG400022159	31397.9	422478	-3.7501	1.6465e-38	2.1781e-36
PGSC0003DMG400014487	5569.16	58038	-3.3815	1.8789e-38	2.4664e-36
PGSC0003DMG400026544	826.716	10136	-3.616	1.8815e-38	2.4664e-36
PGSC0003DMG400010128	6119.31	76220.5	-3.6387	2.3163e-38	3.0048e-36
PGSC0003DMG400028735	3000.61	33256.7	-3.4703	2.3235e-38	3.0048e-36
PGSC0003DMG402025662	421.6	4989.08	-3.5648	2.7532e-38	3.5446e-36
PGSC0003DMG400009337	318.805	3671.46	-3.5256	2.8976e-38	3.714e-36
PGSC0003DMG400020446	18048.6	193714	-3.424	4.3661e-38	5.5714e-36
PGSC0003DMG401025662	199.092	2521.63	-3.6629	6.8637e-38	8.6437e-36
PGSC0003DMG400031444	224.135	2755.53	-3.6199	8.6314e-38	1.0776e-35
PGSC0003DMG400030929	120.706	1659.87	-3.7815	8.9031e-38	1.1067e-35
PGSC0003DMG400019641	9403.1	97769	-3.3782	9.9851e-38	1.2359e-35
[truncated: 4,801 more rows]

## Sheet: X2_24_Up
TableS4 The up-regulated DEGs of X2 tuters at 24 h after cut-wounding
[truncated: 6,667 more rows]

[truncated: 1 more sheets: X2_24h_Down]
