# Supplementary material for: A Genome-Wide View of the Transcriptome Dynamics of Fresh-Cut Potato Tubers
Source: Genes (Basel). 2023 Jan 10;14(1):181. doi: 10.3390/genes14010181 (PMC9859442; doi:10.3390/genes14010181)
Supplement: Supplementary file 1 [file genes-14-00181-s001.zip › Table S5. GO and KEGG enrichment of common DEGs at different time after cut-wounding.xlsx]

## Sheet: GO enrichment_1
Table S5 GO enrichment of common up-regulated DEGs
GO_accession	Description	Term_type	Over_represented_pValue	Corrected_pValue	DEG_item	DEG_list	Bg_item	Bg_list	Gene_names
GO:0003824	catalytic activity	molecular_function	1.6369e-15	8.0533e-12	1683	2644	15776	29181	PGSC0003DMG400009040,Novel00528,PGSC0003DMG400011265,PGSC0003DMG402027394,PGSC0003DMG400030219,PGSC0003DMG400028266,PGSC0003DMG400030882,PGSC0003DMG400014869,PGSC0003DMG400026382,PGSC0003DMG400008091,PGSC0003DMG400002518,PGSC0003DMG400022815,PGSC0003DMG400004440,PGSC0003DMG400009405,PGSC0003DMG400009219,PGSC0003DMG400000227,PGSC0003DMG400022818,PGSC0003DMG400014512,PGSC0003DMG400004659,PGSC0003DM…
3DMG400011074,PGSC0003DMG402000722,PGSC0003DMG400006942,PGSC0003DMG400016880,PGSC0003DMG400006768,PGSC0003DMG401003899,PGSC0003DMG400022845,PGSC0003DMG400015015,PGSC0003DMG402014514,PGSC0003DMG400022492,PGSC0003DMG400027149,PGSC0003DMG400005007,Novel00351,PGSC0003DMG400010314,Novel00376,PGSC0003DMG400009743,PGSC0003DMG400014222,PGSC0003DMG400000511,PGSC0003DMG401017380,PGSC0003DMG400004629,PGSC00…
GO:0044699	single-organism process	biological_process	1.7832e-11	4.3867e-08	1397	2644	13227	29181	PGSC0003DMG400002703,PGSC0003DMG400000778,PGSC0003DMG401020908,PGSC0003DMG400020133,PGSC0003DMG400030394,PGSC0003DMG400002426,PGSC0003DMG400020335,PGSC0003DMG400029794,PGSC0003DMG400008163,PGSC0003DMG400021563,PGSC0003DMG400001096,PGSC0003DMG400031845,PGSC0003DMG401005194,PGSC0003DMG400006088,PGSC0003DMG400001444,Novel00283,PGSC0003DMG400012848,PGSC0003DMG400005284,Novel01806,Novel01713,PGSC0003D…
GO:0006629	lipid metabolic process	biological_process	1.5056e-09	1.6801e-06	213	2644	1481	29181	PGSC0003DMG400018670,PGSC0003DMG400026005,PGSC0003DMG400030950,PGSC0003DMG400012602,PGSC0003DMG400019873,PGSC0003DMG400022225,PGSC0003DMG400001363,PGSC0003DMG402013561,PGSC0003DMG400027188,PGSC0003DMG400023163,PGSC0003DMG402023841,PGSC0003DMG400004067,PGSC0003DMG400005507,PGSC0003DMG400000766,PGSC0003DMG400022749,PGSC0003DMG400004572,PGSC0003DMG400025098,PGSC0003DMG401018740,PGSC0003DMG400028538,…
GO:0044710	single-organism metabolic process	biological_process	1.9922e-09	1.6801e-06	841	2644	7534	29181	PGSC0003DMG400001528,PGSC0003DMG401017657,PGSC0003DMG400016395,PGSC0003DMG400020494,PGSC0003DMG400030630,PGSC0003DMG400004351,PGSC0003DMG400003417,PGSC0003DMG400006506,PGSC0003DMG400029022,PGSC0003DMG400000077,PGSC0003DMG400012593,PGSC0003DMG400004824,PGSC0003DMG400029788,PGSC0003DMG400027393,PGSC0003DMG400026074,PGSC0003DMG400024081,PGSC0003DMG401004603,PGSC0003DMG400027856,PGSC0003DMG400026114,…
GO:0016614	oxidoreductase activity, acting on CH-OH group of donors	molecular_function	2.0489e-09	1.6801e-06	85	2644	455	29181	PGSC0003DMG400028787,Novel00186,PGSC0003DMG400006765,PGSC0003DMG400025137,PGSC0003DMG400002777,PGSC0003DMG400007573,PGSC0003DMG401014396,PGSC0003DMG400024226,PGSC0003DMG400023566,PGSC0003DMG400027156,PGSC0003DMG404027324,PGSC0003DMG400017601,PGSC0003DMG400020334,PGSC0003DMG402007406,PGSC0003DMG400001448,PGSC0003DMG400007059,PGSC0003DMG400030121,PGSC0003DMG400025121,PGSC0003DMG400006214,PGSC0003DM…
GO:0016020	membrane	cellular_component	7.6507e-09	5.3773e-06	923	2644	8461	29181	PGSC0003DMG400027149,PGSC0003DMG400005007,PGSC0003DMG400029794,PGSC0003DMG400020335,PGSC0003DMG400012124,PGSC0003DMG400013213,PGSC0003DMG400005036,PGSC0003DMG400030058,PGSC0003DMG400012569,PGSC0003DMG400005494,PGSC0003DMG400000092,PGSC0003DMG401020908,PGSC0003DMG400019110,PGSC0003DMG400013481,PGSC0003DMG400010430,PGSC0003DMG400028200,PGSC0003DMG400025902,PGSC0003DMG400025117,PGSC0003DMG400024142,…
GO:0016491	oxidoreductase activity	molecular_function	1.4451e-08	8.5662e-06	441	2644	3729	29181	PGSC0003DMG400000433,PGSC0003DMG402001978,PGSC0003DMG400022149,PGSC0003DMG400007488,PGSC0003DMG400019320,PGSC0003DMG401007406,PGSC0003DMG400023428,Novel02153,PGSC0003DMG400022276,PGSC0003DMG400010509,PGSC0003DMG400030082,PGSC0003DMG400024860,PGSC0003DMG400028809,PGSC0003DMG400026069,PGSC0003DMG400011731,Novel02721,PGSC0003DMG400022163,PGSC0003DMG402002164,PGSC0003DMG400000684,PGSC0003DMG400026281…
GO:0016740	transferase activity	molecular_function	1.567e-08	8.5662e-06	806	2644	7096	29181	PGSC0003DMG400006396,PGSC0003DMG400021866,PGSC0003DMG402026272,PGSC0003DMG400001066,PGSC0003DMG402014186,PGSC0003DMG400013476,PGSC0003DMG400028301,PGSC0003DMG400034688,PGSC0003DMG400022742,PGSC0003DMG401013112,PGSC0003DMG400003574,PGSC0003DMG400011015,PGSC0003DMG400025471,PGSC0003DMG400023978,PGSC0003DMG400026128,PGSC0003DMG400011837,PGSC0003DMG400028406,PGSC0003DMG400000560,PGSC0003DMG400025560,…
GO:0008152	metabolic process	biological_process	2.3686e-08	1.1653e-05	1750	2644	17416	29181	PGSC0003DMG400001659,PGSC0003DMG400007634,PGSC0003DMG400030082,PGSC0003DMG400028448,Novel00931,PGSC0003DMG400021324,PGSC0003DMG400020383,PGSC0003DMG400000433,PGSC0003DMG400006589,PGSC0003DMG400010812,PGSC0003DMG400019320,PGSC0003DMG400007488,PGSC0003DMG400016149,PGSC0003DMG400029237,PGSC0003DMG400007288,Novel02721,PGSC0003DMG400004274,PGSC0003DMG400008000,PGSC0003DMG400030941,PGSC0003DMG400000684…
400012154,PGSC0003DMG400005975,PGSC0003DMG402009791,PGSC0003DMG400037250,PGSC0003DMG400027287,PGSC0003DMG401012862,PGSC0003DMG400004659,PGSC0003DMG400027392,PGSC0003DMG400011929,PGSC0003DMG400018793,PGSC0003DMG400009219,PGSC0003DMG400014512,PGSC0003DMG400022818,Novel02840,PGSC0003DMG400026382,PGSC0003DMG400030882,PGSC0003DMG400028162,PGSC0003DMG400028266,PGSC0003DMG400030219,PGSC0003DMG400004440,…
GO:0016616	oxidoreductase activity, acting on the CH-OH group of donors, NAD or NADP as acceptor	molecular_function	3.7226e-08	1.665e-05	75	2644	412	29181	PGSC0003DMG400017842,PGSC0003DMG400026246,PGSC0003DMG400019511,PGSC0003DMG400015444,PGSC0003DMG400027156,PGSC0003DMG400017601,PGSC0003DMG400020334,PGSC0003DMG400007059,PGSC0003DMG400030121,PGSC0003DMG402007406,PGSC0003DMG400001448,PGSC0003DMG400006214,PGSC0003DMG400025121,PGSC0003DMG400025137,PGSC0003DMG400007573,PGSC0003DMG400002777,PGSC0003DMG401014396,PGSC0003DMG400024226,PGSC0003DMG400006765,…
GO:0055114	oxidation-reduction process	biological_process	8.1024e-08	3.322e-05	423	2644	3591	29181	PGSC0003DMG402030469,PGSC0003DMG400031809,PGSC0003DMG400004572,PGSC0003DMG400016168,PGSC0003DMG400018876,PGSC0003DMG400014055,PGSC0003DMG402012803,PGSC0003DMG400003988,PGSC0003DMG400025098,PGSC0003DMG400010092,PGSC0003DMG400017246,PGSC0003DMG400007150,PGSC0003DMG400030890,PGSC0003DMG400030413,PGSC0003DMG400008447,PGSC0003DMG400007552,PGSC0003DMG400031071,PGSC0003DMG400014662,PGSC0003DMG400022225,…
GO:0048037	cofactor binding	molecular_function	9.6263e-08	3.6432e-05	159	2644	1106	29181	PGSC0003DMG400030121,PGSC0003DMG400007059,PGSC0003DMG400027156,PGSC0003DMG400020334,PGSC0003DMG400019511,PGSC0003DMG400022764,PGSC0003DMG400006815,PGSC0003DMG400010246,PGSC0003DMG400020618,PGSC0003DMG400021111,PGSC0003DMG400042005,PGSC0003DMG400006765,PGSC0003DMG400030880,PGSC0003DMG400033642,PGSC0003DMG400021109,PGSC0003DMG400010174,PGSC0003DMG400004828,PGSC0003DMG400025137,PGSC0003DMG400004922,…
GO:0015238	drug transmembrane transporter activity	molecular_function	1.9734e-06	0.00064729	29	2644	114	29181	PGSC0003DMG400024142,PGSC0003DMG400006378,PGSC0003DMG400014473,PGSC0003DMG402003112,PGSC0003DMG400008271,PGSC0003DMG400004962,PGSC0003DMG400018119,PGSC0003DMG400008676,PGSC0003DMG400016457,PGSC0003DMG400029931,Novel00641,PGSC0003DMG400002123,Novel01969,Novel01970,Novel01971,PGSC0003DMG400005967,PGSC0003DMG400010165,PGSC0003DMG402030515,PGSC0003DMG400025501,PGSC0003DMG400004474,Novel02018,PGSC0003…
GO:0090484	drug transporter activity	molecular_function	1.9734e-06	0.00064729	29	2644	114	29181	Novel01970,Novel01971,PGSC0003DMG400005967,Novel01969,Novel00641,PGSC0003DMG400002123,PGSC0003DMG400029931,PGSC0003DMG400016457,PGSC0003DMG400012634,PGSC0003DMG400030630,PGSC0003DMG400020391,PGSC0003DMG400006506,Novel00642,PGSC0003DMG400010166,Novel02018,PGSC0003DMG400018618,PGSC0003DMG400016143,PGSC0003DMG402030515,PGSC0003DMG400010165,PGSC0003DMG400025501,PGSC0003DMG400004474,PGSC0003DMG4000144…
GO:0006855	drug transmembrane transport	biological_process	3.0101e-06	0.00087116	28	2644	110	29181	PGSC0003DMG400024142,PGSC0003DMG400006378,PGSC0003DMG402003112,PGSC0003DMG400008271,PGSC0003DMG400004962,PGSC0003DMG400018119,PGSC0003DMG400008676,PGSC0003DMG400016457,PGSC0003DMG400029931,Novel00641,PGSC0003DMG400002123,Novel01969,Novel01970,Novel01971,PGSC0003DMG400005967,PGSC0003DMG400010165,PGSC0003DMG402030515,PGSC0003DMG400004474,PGSC0003DMG400025501,Novel02018,PGSC0003DMG400018618,PGSC0003…
GO:0015893	drug transport	biological_process	3.0101e-06	0.00087116	28	2644	110	29181	PGSC0003DMG400008271,PGSC0003DMG400004962,PGSC0003DMG400008676,PGSC0003DMG400018119,PGSC0003DMG400006378,PGSC0003DMG400024142,PGSC0003DMG402003112,Novel02018,PGSC0003DMG400018618,PGSC0003DMG400016143,PGSC0003DMG402030515,PGSC0003DMG400010165,PGSC0003DMG400025501,PGSC0003DMG400004474,PGSC0003DMG400012634,PGSC0003DMG400030630,PGSC0003DMG400020391,PGSC0003DMG400006506,PGSC0003DMG400010166,Novel00642…
GO:0031012	extracellular matrix	cellular_component	7.8311e-06	0.0021405	33	2644	167	29181	PGSC0003DMG400001924,PGSC0003DMG402028340,PGSC0003DMG400027692,PGSC0003DMG400014797,PGSC0003DMG400009004,PGSC0003DMG400033685,PGSC0003DMG400016313,PGSC0003DMG400012434,PGSC0003DMG400028787,PGSC0003DMG400018823,PGSC0003DMG400047233,PGSC0003DMG400001923,PGSC0003DMG400008692,PGSC0003DMG400014236,PGSC0003DMG400004818,PGSC0003DMG400008163,PGSC0003DMG400021068,PGSC0003DMG400017965,PGSC0003DMG400000890,…
GO:0042493	response to drug	biological_process	8.96e-06	0.0023202	28	2644	117	29181	PGSC0003DMG402003112,PGSC0003DMG400006378,PGSC0003DMG400024142,PGSC0003DMG400008676,PGSC0003DMG400018119,PGSC0003DMG400008271,PGSC0003DMG400004962,Novel01970,Novel01971,PGSC0003DMG400005967,Novel01969,PGSC0003DMG400002123,Novel00641,PGSC0003DMG400029931,PGSC0003DMG400016457,PGSC0003DMG400030630,PGSC0003DMG400012634,PGSC0003DMG400020391,PGSC0003DMG400006506,Novel00642,PGSC0003DMG400010166,Novel020…
GO:0044763	single-organism cellular process	biological_process	9.8799e-06	0.0024305	1023	2644	9739	29181	PGSC0003DMG400011649,PGSC0003DMG400011347,PGSC0003DMG400011195,PGSC0003DMG400032227,PGSC0003DMG400013924,Novel02599,PGSC0003DMG400036493,PGSC0003DMG400021023,PGSC0003DMG400000931,PGSC0003DMG400019612,PGSC0003DMG400002204,PGSC0003DMG400024615,PGSC0003DMG400010415,PGSC0003DMG400029753,PGSC0003DMG400013633,PGSC0003DMG400003927,PGSC0003DMG400031828,PGSC0003DMG400013474,PGSC0003DMG400016918,PGSC0003DM…
GO:0016746	transferase activity, transferring acyl groups	molecular_function	1.5562e-05	0.003646	118	2644	834	29181	PGSC0003DMG400007965,PGSC0003DMG400007171,PGSC0003DMG400029262,PGSC0003DMG400007800,PGSC0003DMG400012522,PGSC0003DMG400024511,PGSC0003DMG400022911,PGSC0003DMG400009405,PGSC0003DMG400002518,PGSC0003DMG400010819,PGSC0003DMG400008271,PGSC0003DMG400009219,PGSC0003DMG400027951,PGSC0003DMG402015686,PGSC0003DMG400014656,PGSC0003DMG400008977,PGSC0003DMG401021549,PGSC0003DMG400028374,PGSC0003DMG400014152,…
GO:0050662	coenzyme binding	molecular_function	1.7372e-05	0.0038849	123	2644	885	29181	PGSC0003DMG401007406,Novel01240,Novel03619,PGSC0003DMG400027012,PGSC0003DMG400006270,Novel00852,PGSC0003DMG400024860,PGSC0003DMG400000433,PGSC0003DMG402013561,PGSC0003DMG400009956,PGSC0003DMG402001978,PGSC0003DMG400026005,PGSC0003DMG400032121,PGSC0003DMG400009159,Novel00276,PGSC0003DMG400008356,PGSC0003DMG400002612,PGSC0003DMG400030890,PGSC0003DMG400026320,PGSC0003DMG400010092,PGSC0003DMG40002509…
GO:0031224	intrinsic component of membrane	cellular_component	2.5354e-05	0.0054235	494	2644	4432	29181	PGSC0003DMG400030229,PGSC0003DMG400001410,PGSC0003DMG400027080,PGSC0003DMG400030740,Novel01890,PGSC0003DMG400029164,PGSC0003DMG400014324,PGSC0003DMG400015599,PGSC0003DMG400030134,PGSC0003DMG400003889,PGSC0003DMG400015595,PGSC0003DMG400004470,PGSC0003DMG400015909,PGSC0003DMG400003531,PGSC0003DMG400022063,PGSC0003DMG400001632,PGSC0003DMG400000359,PGSC0003DMG400000608,PGSC0003DMG400001430,PGSC0003DM…
GO:0003810	protein-glutamine gamma-glutamyltransferase activity	molecular_function	3.1844e-05	0.006267	7	2644	11	29181	PGSC0003DMG400028234,Novel01899,PGSC0003DMG400013779,Novel01736,PGSC0003DMG400031457,PGSC0003DMG401021549,PGSC0003DMG402021564
GO:0018149	peptide cross-linking	biological_process	3.1844e-05	0.006267	7	2644	11	29181	PGSC0003DMG400028234,Novel01899,PGSC0003DMG400013779,PGSC0003DMG400031457,Novel01736,PGSC0003DMG401021549,PGSC0003DMG402021564
GO:0044765	single-organism transport	biological_process	3.3763e-05	0.006389	450	2644	3988	29181	PGSC0003DMG400015405,PGSC0003DMG400003122,PGSC0003DMG400011365,PGSC0003DMG400021394,PGSC0003DMG400000173,PGSC0003DMG400024120,PGSC0003DMG400005668,PGSC0003DMG400025523,PGSC0003DMG400020391,PGSC0003DMG400028310,PGSC0003DMG400018792,PGSC0003DMG400017824,PGSC0003DMG400007295,PGSC0003DMG400018618,Novel01055,PGSC0003DMG400015263,PGSC0003DMG400011167,PGSC0003DMG400024280,PGSC0003DMG400002190,PGSC0003DM…
GO:0016757	transferase activity, transferring glycosyl groups	molecular_function	3.6464e-05	0.0066445	149	2644	1098	29181	PGSC0003DMG400011347,PGSC0003DMG400016193,PGSC0003DMG400003067,PGSC0003DMG400025931,PGSC0003DMG400004427,PGSC0003DMG400001685,PGSC0003DMG400028267,PGSC0003DMG402029824,PGSC0003DMG400013177,PGSC0003DMG400029825,PGSC0003DMG400026516,PGSC0003DMG400031262,PGSC0003DMG400029348,PGSC0003DMG400029347,PGSC0003DMG400012551,Novel03255,PGSC0003DMG402027210,PGSC0003DMG400015749,PGSC0003DMG400027200,PGSC0003DM…
GO:0016021	integral component of membrane	cellular_component	3.8482e-05	0.0067618	487	2644	4381	29181	PGSC0003DMG400027392,PGSC0003DMG400021614,PGSC0003DMG400015496,PGSC0003DMG400010229,PGSC0003DMG400012680,PGSC0003DMG400007359,PGSC0003DMG400003509,PGSC0003DMG400016891,PGSC0003DMG400026225,PGSC0003DMG400021039,PGSC0003DMG400003993,PGSC0003DMG400006594,PGSC0003DMG400008936,PGSC0003DMG400016479,PGSC0003DMG400004318,PGSC0003DMG401028367,PGSC0003DMG400014134,PGSC0003DMG400010097,PGSC0003DMG400026516,…
GO:1902578	single-organism localization	biological_process	4.0079e-05	0.0067996	459	2644	4081	29181	PGSC0003DMG400023130,Novel01399,PGSC0003DMG400015575,PGSC0003DMG400001856,PGSC0003DMG400017020,PGSC0003DMG400014843,PGSC0003DMG400018515,PGSC0003DMG400031832,PGSC0003DMG400028842,PGSC0003DMG400019695,PGSC0003DMG400002133,PGSC0003DMG402008889,PGSC0003DMG400030701,PGSC0003DMG400028374,PGSC0003DMG400002123,PGSC0003DMG400011278,PGSC0003DMG400006919,PGSC0003DMG400009117,PGSC0003DMG400000385,PGSC0003DM…
GO:0006694	steroid biosynthetic process	biological_process	5.2775e-05	0.0086551	30	2644	144	29181	PGSC0003DMG400011038,PGSC0003DMG400017601,PGSC0003DMG400010076,PGSC0003DMG402007406,PGSC0003DMG400007059,PGSC0003DMG400003792,PGSC0003DMG400007665,PGSC0003DMG400017842,PGSC0003DMG400015379,PGSC0003DMG400033906,PGSC0003DMG400019511,PGSC0003DMG400004659,PGSC0003DMG400010092,PGSC0003DMG400015444,PGSC0003DMG400027735,PGSC0003DMG400006621,PGSC0003DMG401007406,PGSC0003DMG400028521,PGSC0003DMG400007017,…
GO:0008610	lipid biosynthetic process	biological_process	6.462e-05	0.010256	104	2644	733	29181	PGSC0003DMG400024860,PGSC0003DMG402023841,PGSC0003DMG400013443,PGSC0003DMG400022749,PGSC0003DMG400033650,PGSC0003DMG401007406,PGSC0003DMG400032121,PGSC0003DMG400018670,PGSC0003DMG400026005,PGSC0003DMG402001978,PGSC0003DMG400022225,PGSC0003DMG402013561,PGSC0003DMG400000433,PGSC0003DMG400017516,PGSC0003DMG401014249,PGSC0003DMG400025587,PGSC0003DMG400010076,PGSC0003DMG400008690,PGSC0003DMG400009965,…
GO:0015159	polysaccharide transmembrane transporter activity	molecular_function	7.8653e-05	0.011726	7	2644	15	29181	PGSC0003DMG400001459,PGSC0003DMG401014249,PGSC0003DMG400005540,PGSC0003DMG400047233,PGSC0003DMG400033685,PGSC0003DMG400021068,PGSC0003DMG400027384
GO:0006631	fatty acid metabolic process	biological_process	0.00011088	0.015525	53	2644	323	29181	PGSC0003DMG400022750,PGSC0003DMG400004608,PGSC0003DMG400029552,PGSC0003DMG400008551,PGSC0003DMG400025121,Novel01813,PGSC0003DMG400027156,PGSC0003DMG400020334,PGSC0003DMG400030422,PGSC0003DMG400006506,PGSC0003DMG400018583,PGSC0003DMG401024074,PGSC0003DMG400015678,PGSC0003DMG401017380,PGSC0003DMG400024204,PGSC0003DMG400010819,PGSC0003DMG400004253,PGSC0003DMG400004800,PGSC0003DMG400024591,PGSC0003DM…
GO:0044255	cellular lipid metabolic process	biological_process	0.00011859	0.015525	129	2644	957	29181	PGSC0003DMG400015749,Novel01813,PGSC0003DMG400025121,PGSC0003DMG400016121,PGSC0003DMG400026494,PGSC0003DMG400022911,PGSC0003DMG400009405,PGSC0003DMG400024591,PGSC0003DMG400015673,PGSC0003DMG400033029,PGSC0003DMG400024204,PGSC0003DMG400002204,PGSC0003DMG400002201,PGSC0003DMG400010415,PGSC0003DMG400000139,PGSC0003DMG400006410,PGSC0003DMG400016193,PGSC0003DMG400003509,PGSC0003DMG400026225,PGSC0003DM…
GO:0006810	transport	biological_process	0.00011906	0.015525	594	2644	5475	29181	PGSC0003DMG400029915,PGSC0003DMG400000468,PGSC0003DMG400012501,PGSC0003DMG400005967,PGSC0003DMG400011792,PGSC0003DMG400009401,PGSC0003DMG400004093,PGSC0003DMG400029362,PGSC0003DMG400023039,PGSC0003DMG400025501,PGSC0003DMG400014183,PGSC0003DMG400025616,PGSC0003DMG400017298,Novel01689,PGSC0003DMG400024754,PGSC0003DMG400001363,PGSC0003DMG400019873,PGSC0003DMG402003705,PGSC0003DMG400026784,PGSC0003DM…
GO:0003885	D-arabinono-1,4-lactone oxidase activity	molecular_function	0.00011991	0.015525	8	2644	16	29181	PGSC0003DMG400023566,PGSC0003DMG400024003,PGSC0003DMG400011957,PGSC0003DMG400008447,PGSC0003DMG404027324,PGSC0003DMG400005494,PGSC0003DMG400014250,PGSC0003DMG400028787
GO:0016899	oxidoreductase activity, acting on the CH-OH group of donors, oxygen as acceptor	molecular_function	0.00011991	0.015525	8	2644	16	29181	PGSC0003DMG400024003,PGSC0003DMG400023566,PGSC0003DMG400028787,PGSC0003DMG400014250,PGSC0003DMG400005494,PGSC0003DMG404027324,PGSC0003DMG400008447,PGSC0003DMG400011957
GO:0005578	proteinaceous extracellular matrix	cellular_component	0.00013715	0.01705	26	2644	137	29181	PGSC0003DMG400010704,PGSC0003DMG400014236,PGSC0003DMG400006385,PGSC0003DMG400019527,PGSC0003DMG400006233,PGSC0003DMG400008163,PGSC0003DMG400021068,PGSC0003DMG400047233,PGSC0003DMG400018823,PGSC0003DMG400023440,PGSC0003DMG400008692,PGSC0003DMG400017965,PGSC0003DMG400029833,PGSC0003DMG400000890,PGSC0003DMG400027384,PGSC0003DMG400009883,PGSC0003DMG400005540,PGSC0003DMG400033335,PGSC0003DMG400001333,…
GO:0008202	steroid metabolic process	biological_process	0.00014072	0.01705	31	2644	158	29181	PGSC0003DMG400004659,PGSC0003DMG400015444,PGSC0003DMG400010092,PGSC0003DMG400019511,PGSC0003DMG400030496,PGSC0003DMG400007665,PGSC0003DMG400017842,PGSC0003DMG400033906,PGSC0003DMG400015379,PGSC0003DMG402007406,PGSC0003DMG400003792,PGSC0003DMG400007059,PGSC0003DMG400017601,PGSC0003DMG400010076,PGSC0003DMG400011038,PGSC0003DMG400000521,PGSC0003DMG400009591,PGSC0003DMG400000433,PGSC0003DMG400026005,…
GO:0009055	electron carrier activity	molecular_function	0.00014208	0.01705	77	2644	581	29181	PGSC0003DMG400000621,PGSC0003DMG400001752,PGSC0003DMG400028642,PGSC0003DMG400026069,PGSC0003DMG400001437,PGSC0003DMG402030815,PGSC0003DMG400032506,PGSC0003DMG400007488,PGSC0003DMG400022318,PGSC0003DMG400009925,PGSC0003DMG400030839,PGSC0003DMG400031370,PGSC0003DMG400011391,PGSC0003DMG400015711,PGSC0003DMG400009887,PGSC0003DMG400011731,PGSC0003DMG402002164,PGSC0003DMG400011168,PGSC0003DMG400016401,…
GO:0003854	3-beta-hydroxy-delta5-steroid dehydrogenase activity	molecular_function	0.00015518	0.017352	27	2644	131	29181	PGSC0003DMG400000521,PGSC0003DMG400009591,PGSC0003DMG400000433,PGSC0003DMG400026005,PGSC0003DMG400000021,PGSC0003DMG400000404,PGSC0003DMG402023929,PGSC0003DMG400004996,PGSC0003DMG400032121,PGSC0003DMG401021138,PGSC0003DMG401007406,PGSC0003DMG400007017,PGSC0003DMG400028521,PGSC0003DMG400027735,PGSC0003DMG400006621,PGSC0003DMG400004659,PGSC0003DMG400010092,PGSC0003DMG400015444,PGSC0003DMG400019511,…
GO:0016229	steroid dehydrogenase activity	molecular_function	0.00015518	0.017352	27	2644	131	29181	PGSC0003DMG402007406,PGSC0003DMG400007059,PGSC0003DMG400011038,PGSC0003DMG400017601,PGSC0003DMG400019511,PGSC0003DMG400004659,PGSC0003DMG400015444,PGSC0003DMG400010092,PGSC0003DMG400017842,PGSC0003DMG400007665,PGSC0003DMG400015379,PGSC0003DMG400033906,PGSC0003DMG401007406,PGSC0003DMG400028521,PGSC0003DMG400007017,PGSC0003DMG400027735,PGSC0003DMG400006621,PGSC0003DMG400000433,PGSC0003DMG400009591,…
GO:0033764	steroid dehydrogenase activity, acting on the CH-OH group of donors, NAD or NADP as acceptor	molecular_function	0.00015518	0.017352	27	2644	131	29181	PGSC0003DMG400000521,PGSC0003DMG400009591,PGSC0003DMG400000433,PGSC0003DMG400026005,PGSC0003DMG400000021,PGSC0003DMG400000404,PGSC0003DMG400032121,PGSC0003DMG401021138,PGSC0003DMG400004996,PGSC0003DMG402023929,PGSC0003DMG400028521,PGSC0003DMG400007017,PGSC0003DMG401007406,PGSC0003DMG400006621,PGSC0003DMG400027735,PGSC0003DMG400010092,PGSC0003DMG400015444,PGSC0003DMG400004659,PGSC0003DMG400019511,…
GO:0019752	carboxylic acid metabolic process	biological_process	0.00016119	0.017623	172	2644	1353	29181	PGSC0003DMG400012997,PGSC0003DMG400000433,PGSC0003DMG400009956,PGSC0003DMG402028101,PGSC0003DMG400032121,PGSC0003DMG400011044,Novel01240,PGSC0003DMG400013443,PGSC0003DMG400033650,PGSC0003DMG400010485,PGSC0003DMG400024392,PGSC0003DMG400006965,PGSC0003DMG400016247,PGSC0003DMG400014379,PGSC0003DMG400008356,PGSC0003DMG400013273,PGSC0003DMG400002612,PGSC0003DMG400013331,PGSC0003DMG400025005,PGSC0003DM…
GO:0015291	secondary active transmembrane transporter activity	molecular_function	0.00016625	0.017782	42	2644	241	29181	Novel00641,Novel00909,PGSC0003DMG400002944,PGSC0003DMG400016457,Novel01971,PGSC0003DMG400005967,PGSC0003DMG400021614,PGSC0003DMG400021023,PGSC0003DMG400016505,Novel01969,PGSC0003DMG400016143,PGSC0003DMG400018618,PGSC0003DMG400016891,PGSC0003DMG400025501,PGSC0003DMG400009074,PGSC0003DMG400011649,PGSC0003DMG400020391,PGSC0003DMG400012634,PGSC0003DMG400011249,PGSC0003DMG402018143,PGSC0003DMG40001413…
GO:0044711	single-organism biosynthetic process	biological_process	0.00018153	0.019003	271	2644	2306	29181	Novel03619,PGSC0003DMG400006270,PGSC0003DMG400022225,PGSC0003DMG400002396,Novel03103,PGSC0003DMG400029938,PGSC0003DMG400008447,PGSC0003DMG400009477,PGSC0003DMG400025171,PGSC0003DMG400014622,PGSC0003DMG400029591,PGSC0003DMG400028538,PGSC0003DMG400026127,PGSC0003DMG400009887,PGSC0003DMG400010092,PGSC0003DMG401018740,PGSC0003DMG400016553,PGSC0003DMG400004572,PGSC0003DMG400047044,PGSC0003DMG400018763…
GO:0051234	establishment of localization	biological_process	0.00019117	0.019595	595	2644	5510	29181	PGSC0003DMG400007341,PGSC0003DMG402005074,PGSC0003DMG400028124,PGSC0003DMG400021785,PGSC0003DMG400019789,Novel01717,PGSC0003DMG400002789,PGSC0003DMG400007784,PGSC0003DMG400008311,PGSC0003DMG400012133,PGSC0003DMG400029074,PGSC0003DMG400004795,PGSC0003DMG400015218,PGSC0003DMG400018854,PGSC0003DMG400021091,PGSC0003DMG400009456,PGSC0003DMG400013896,PGSC0003DMG400026278,PGSC0003DMG400016433,PGSC0003DM…
GO:0015774	polysaccharide transport	biological_process	0.00023395	0.022671	7	2644	17	29181	PGSC0003DMG400001459,PGSC0003DMG400005540,PGSC0003DMG401014249,PGSC0003DMG400047233,PGSC0003DMG400033685,PGSC0003DMG400027384,PGSC0003DMG400021068
GO:0033037	polysaccharide localization	biological_process	0.00023395	0.022671	7	2644	17	29181	PGSC0003DMG400001459,PGSC0003DMG401014249,PGSC0003DMG400005540,PGSC0003DMG400047233,PGSC0003DMG400033685,PGSC0003DMG400021068,PGSC0003DMG400027384
GO:0032787	monocarboxylic acid metabolic process	biological_process	0.000235	0.022671	72	2644	488	29181	PGSC0003DMG400029620,PGSC0003DMG400002011,Novel00910,PGSC0003DMG400002201,PGSC0003DMG400005498,PGSC0003DMG400033906,PGSC0003DMG400010415,PGSC0003DMG400000139,PGSC0003DMG400012642,PGSC0003DMG400001684,PGSC0003DMG400007373,PGSC0003DMG400019247,PGSC0003DMG400011238,PGSC0003DMG400027025,PGSC0003DMG400012802,PGSC0003DMG400004996,PGSC0003DMG401021138,PGSC0003DMG400014134,PGSC0003DMG400020334,PGSC0003DM…
GO:0043436	oxoacid metabolic process	biological_process	0.00028481	0.026947	173	2644	1376	29181	PGSC0003DMG400013779,PGSC0003DMG400004253,PGSC0003DMG400021507,PGSC0003DMG400027014,PGSC0003DMG400027735,PGSC0003DMG400017627,PGSC0003DMG400006140,PGSC0003DMG400021441,PGSC0003DMG400015909,PGSC0003DMG400000404,PGSC0003DMG400026536,PGSC0003DMG400029552,PGSC0003DMG400001287,PGSC0003DMG400004351,PGSC0003DMG400011038,PGSC0003DMG400018583,PGSC0003DMG400006506,PGSC0003DMG400011837,PGSC0003DMG400029022,…
GO:0044281	small molecule metabolic process	biological_process	0.00030099	0.027941	274	2644	2351	29181	PGSC0003DMG400012634,PGSC0003DMG400025005,PGSC0003DMG400002612,PGSC0003DMG400013331,PGSC0003DMG400013273,PGSC0003DMG400016247,PGSC0003DMG400006965,PGSC0003DMG400001752,PGSC0003DMG400004744,PGSC0003DMG400024392,PGSC0003DMG400015276,PGSC0003DMG400010485,PGSC0003DMG400022200,PGSC0003DMG400028904,PGSC0003DMG400011044,Novel01240,PGSC0003DMG400013443,PGSC0003DMG400033650,PGSC0003DMG400010084,PGSC0003DM…
GO:0003857	3-hydroxyacyl-CoA dehydrogenase activity	molecular_function	0.00030679	0.027952	22	2644	106	29181	PGSC0003DMG400011238,PGSC0003DMG400004800,Novel01240,PGSC0003DMG400027025,PGSC0003DMG400000376,PGSC0003DMG400000433,PGSC0003DMG401014396,PGSC0003DMG400032121,PGSC0003DMG400004996,PGSC0003DMG401021138,PGSC0003DMG400025121,PGSC0003DMG400004608,Novel00910,PGSC0003DMG400006506,PGSC0003DMG400020334,PGSC0003DMG400027156,PGSC0003DMG400001932,PGSC0003DMG400015678,PGSC0003DMG400012642,PGSC0003DMG400004572…
GO:0051179	localization	biological_process	0.00038532	0.033988	610	2644	5703	29181	PGSC0003DMG400024998,PGSC0003DMG400014473,PGSC0003DMG400012802,PGSC0003DMG400022639,PGSC0003DMG400002190,PGSC0003DMG400024280,Novel01882,PGSC0003DMG400011245,PGSC0003DMG400024904,PGSC0003DMG401025764,PGSC0003DMG400014173,PGSC0003DMG400015405,PGSC0003DMG400003122,PGSC0003DMG401023644,PGSC0003DMG400011167,PGSC0003DMG400018618,PGSC0003DMG400017824,PGSC0003DMG400025523,PGSC0003DMG400020391,PGSC0003DM…
GO:0006082	organic acid metabolic process	biological_process	0.00038954	0.033988	173	2644	1386	29181	PGSC0003DMG400014543,Novel01813,PGSC0003DMG400019677,PGSC0003DMG400025121,PGSC0003DMG400012903,PGSC0003DMG400010826,PGSC0003DMG400026494,PGSC0003DMG400026382,PGSC0003DMG400024591,PGSC0003DMG400030219,PGSC0003DMG400026280,PGSC0003DMG401031064,PGSC0003DMG400000193,PGSC0003DMG400028127,PGSC0003DMG400033921,PGSC0003DMG400012186,PGSC0003DMG400003755,PGSC0003DMG400024204,PGSC0003DMG400018793,PGSC0003DM…
GO:0051287	NAD binding	molecular_function	0.00039377	0.033988	45	2644	276	29181	PGSC0003DMG400024226,PGSC0003DMG400003213,PGSC0003DMG400032556,PGSC0003DMG400007573,PGSC0003DMG400002777,PGSC0003DMG400005886,PGSC0003DMG400025137,PGSC0003DMG402023929,PGSC0003DMG400004800,PGSC0003DMG400006765,PGSC0003DMG400026278,PGSC0003DMG400012593,PGSC0003DMG400015678,PGSC0003DMG400019511,PGSC0003DMG400030683,PGSC0003DMG400026456,PGSC0003DMG400020618,PGSC0003DMG400015379,PGSC0003DMG400006214,…
GO:0016998	cell wall macromolecule catabolic process	biological_process	0.00042526	0.036073	9	2644	26	29181	PGSC0003DMG400026855,PGSC0003DMG400025063,PGSC0003DMG400008673,PGSC0003DMG400039856,PGSC0003DMG400019446,PGSC0003DMG400026854,PGSC0003DMG400026853,PGSC0003DMG400044116,PGSC0003DMG400001528
GO:0006820	anion transport	biological_process	0.00043408	0.036194	58	2644	384	29181	PGSC0003DMG400002539,PGSC0003DMG400032825,PGSC0003DMG400018515,PGSC0003DMG400020266,PGSC0003DMG400003574,PGSC0003DMG400020427,PGSC0003DMG400008360,PGSC0003DMG400008270,PGSC0003DMG400027381,PGSC0003DMG400014203,PGSC0003DMG400024981,PGSC0003DMG400004253,PGSC0003DMG400013886,PGSC0003DMG400019315,PGSC0003DMG400002730,PGSC0003DMG402017902,PGSC0003DMG400001410,PGSC0003DMG400023518,PGSC0003DMG400014312,…
GO:0016758	transferase activity, transferring hexosyl groups	molecular_function	0.00044139	0.036194	108	2644	801	29181	PGSC0003DMG400028632,PGSC0003DMG400011027,PGSC0003DMG400008472,PGSC0003DMG400030454,PGSC0003DMG400004824,PGSC0003DMG400021347,PGSC0003DMG400001567,PGSC0003DMG400000431,PGSC0003DMG402023186,PGSC0003DMG400008557,PGSC0003DMG400034632,PGSC0003DMG400017723,PGSC0003DMG401031070,PGSC0003DMG400001580,PGSC0003DMG400004253,PGSC0003DMG400019657,PGSC0003DMG402008915,PGSC0003DMG401003156,PGSC0003DMG400009529,…
GO:0016762	xyloglucan:xyloglucosyl transferase activity	molecular_function	0.00048491	0.03848	12	2644	45	29181	PGSC0003DMG400013975,PGSC0003DMG400024060,PGSC0003DMG400014823,PGSC0003DMG400024755,PGSC0003DMG400003866,PGSC0003DMG401018740,PGSC0003DMG400002545,PGSC0003DMG400004824,PGSC0003DMG400017299,PGSC0003DMG400014024,PGSC0003DMG400017298,PGSC0003DMG400031262
GO:0048046	apoplast	cellular_component	0.00048491	0.03848	12	2644	45	29181	PGSC0003DMG400017298,PGSC0003DMG400017299,PGSC0003DMG400014024,PGSC0003DMG400031262,PGSC0003DMG400024060,PGSC0003DMG400013975,PGSC0003DMG400002545,PGSC0003DMG401018740,PGSC0003DMG400004824,PGSC0003DMG400003866,PGSC0003DMG400024755,PGSC0003DMG400014823
GO:0071554	cell wall organization or biogenesis	biological_process	0.0005372	0.041952	39	2644	237	29181	PGSC0003DMG400025063,PGSC0003DMG400026855,PGSC0003DMG400023822,PGSC0003DMG400000783,PGSC0003DMG402028784,PGSC0003DMG400021603,PGSC0003DMG400006286,PGSC0003DMG400000779,PGSC0003DMG400009177,PGSC0003DMG400000778,PGSC0003DMG400001528,PGSC0003DMG400003574,PGSC0003DMG400026854,PGSC0003DMG400002074,PGSC0003DMG400011246,PGSC0003DMG400027954,PGSC0003DMG400028675,PGSC0003DMG400014662,PGSC0003DMG400025627,…
GO:0008509	anion transmembrane transporter activity	molecular_function	0.00054984	0.042269	38	2644	219	29181	PGSC0003DMG400018515,PGSC0003DMG400002539,PGSC0003DMG400012516,PGSC0003DMG400020427,PGSC0003DMG400004253,PGSC0003DMG400019315,PGSC0003DMG400013886,PGSC0003DMG400024981,PGSC0003DMG400007463,PGSC0003DMG400014312,PGSC0003DMG400002730,PGSC0003DMG400001410,PGSC0003DMG400009074,PGSC0003DMG400029074,PGSC0003DMG400032227,PGSC0003DMG400017298,PGSC0003DMG400007784,PGSC0003DMG400025523,PGSC0003DMG400008311,…
GO:0044425	membrane part	cellular_component	0.00061159	0.046292	596	2644	5635	29181	PGSC0003DMG400029967,PGSC0003DMG400027954,PGSC0003DMG400004437,PGSC0003DMG400020266,PGSC0003DMG401027116,PGSC0003DMG400004608,PGSC0003DMG403024882,PGSC0003DMG400013408,PGSC0003DMG400004449,PGSC0003DMG400020427,PGSC0003DMG400006663,Novel01243,PGSC0003DMG400009454,PGSC0003DMG400005160,PGSC0003DMG400021372,PGSC0003DMG400008831,PGSC0003DMG400028102,PGSC0003DMG400017723,PGSC0003DMG400001580,PGSC0003DM…
GO:0003993	acid phosphatase activity	molecular_function	0.00067442	0.050275	13	2644	50	29181	PGSC0003DMG400022221,PGSC0003DMG400009862,PGSC0003DMG402016495,PGSC0003DMG400017152,PGSC0003DMG400031296,PGSC0003DMG400030965,PGSC0003DMG400021596,PGSC0003DMG400020426,PGSC0003DMG400012910,PGSC0003DMG401016495,PGSC0003DMG400002696,PGSC0003DMG400028371,PGSC0003DMG400030964
GO:0016747	transferase activity, transferring acyl groups other than amino-acyl groups	molecular_function	0.00082505	0.060585	85	2644	626	29181	PGSC0003DMG402023631,PGSC0003DMG400019822,PGSC0003DMG400001525,PGSC0003DMG400016360,PGSC0003DMG400026632,PGSC0003DMG400013579,PGSC0003DMG400019110,PGSC0003DMG400015229,Novel00283,PGSC0003DMG400012848,PGSC0003DMG400018700,PGSC0003DMG400004253,PGSC0003DMG401017380,PGSC0003DMG400025881,PGSC0003DMG400015213,PGSC0003DMG400014770,PGSC0003DMG400026128,PGSC0003DMG400007155,PGSC0003DMG400016395,PGSC0003DM…
GO:0044036	cell wall macromolecule metabolic process	biological_process	0.00086447	0.062547	13	2644	53	29181	PGSC0003DMG400014662,PGSC0003DMG400025063,PGSC0003DMG400008673,PGSC0003DMG400033063,PGSC0003DMG400001059,PGSC0003DMG400026855,PGSC0003DMG400026853,PGSC0003DMG400044116,PGSC0003DMG400001528,PGSC0003DMG400029362,PGSC0003DMG400026854,PGSC0003DMG400039856,PGSC0003DMG400019446
GO:0016301	kinase activity	molecular_function	0.00088051	0.062784	294	2644	2447	29181	PGSC0003DMG400017943,PGSC0003DMG400001854,PGSC0003DMG400013928,PGSC0003DMG400010665,Novel03516,PGSC0003DMG400001709,PGSC0003DMG400010411,PGSC0003DMG400021265,PGSC0003DMG400023326,PGSC0003DMG400026155,PGSC0003DMG400006022,PGSC0003DMG400023608,PGSC0003DMG400017350,PGSC0003DMG400027124,PGSC0003DMG400021818,PGSC0003DMG400024575,PGSC0003DMG400009154,PGSC0003DMG400011251,PGSC0003DMG400027269,PGSC0003DM…
GO:0055085	transmembrane transport	biological_process	0.001023	0.071903	217	2644	1851	29181	PGSC0003DMG400005956,PGSC0003DMG400002730,PGSC0003DMG402003112,PGSC0003DMG402023631,PGSC0003DMG400002690,PGSC0003DMG400024142,Novel01806,PGSC0003DMG400001332,PGSC0003DMG400006378,PGSC0003DMG400002066,PGSC0003DMG400014203,PGSC0003DMG400003879,PGSC0003DMG400007886,PGSC0003DMG400001096,PGSC0003DMG400010617,PGSC0003DMG400017723,PGSC0003DMG400005160,Novel01970,PGSC0003DMG400029931,PGSC0003DMG400027149…
GO:0046912	transferase activity, transferring acyl groups, acyl groups converted into alkyl on transfer	molecular_function	0.0010383	0.071951	10	2644	33	29181	PGSC0003DMG400004696,PGSC0003DMG400014622,PGSC0003DMG400012522,PGSC0003DMG400024016,PGSC0003DMG400022402,PGSC0003DMG400014656,PGSC0003DMG400022750,PGSC0003DMG400028102,PGSC0003DMG400022749,PGSC0003DMG400004253
GO:0042440	pigment metabolic process	biological_process	0.001207	0.081729	43	2644	274	29181	PGSC0003DMG400028234,Novel03103,PGSC0003DMG400018665,PGSC0003DMG400022405,PGSC0003DMG402001978,PGSC0003DMG401021138,PGSC0003DMG402028101,PGSC0003DMG400011238,Novel01240,Novel03619,PGSC0003DMG400025813,PGSC0003DMG400028124,PGSC0003DMG400009887,PGSC0003DMG400002201,PGSC0003DMG400021128,PGSC0003DMG400004572,PGSC0003DMG400019347,PGSC0003DMG400024765,Novel00910,PGSC0003DMG400026225,PGSC0003DMG40000723…
GO:0015996	chlorophyll catabolic process	biological_process	0.0012293	0.081729	16	2644	73	29181	PGSC0003DMG400025814,PGSC0003DMG400022493,PGSC0003DMG400006709,PGSC0003DMG400025813,PGSC0003DMG400033029,PGSC0003DMG400031845,PGSC0003DMG400028124,Novel00283,PGSC0003DMG402023438,PGSC0003DMG400008308,PGSC0003DMG400004629,PGSC0003DMG400021128,PGSC0003DMG400007233,PGSC0003DMG400024765,PGSC0003DMG400019347,PGSC0003DMG400011038
GO:0047746	chlorophyllase activity	molecular_function	0.0012293	0.081729	16	2644	73	29181	PGSC0003DMG400022493,PGSC0003DMG400006709,PGSC0003DMG400025814,Novel00283,PGSC0003DMG400028124,PGSC0003DMG402023438,PGSC0003DMG400025813,PGSC0003DMG400031845,PGSC0003DMG400033029,PGSC0003DMG400004629,PGSC0003DMG400021128,PGSC0003DMG400008308,PGSC0003DMG400011038,PGSC0003DMG400007233,PGSC0003DMG400019347,PGSC0003DMG400024765
GO:0030154	cell differentiation	biological_process	0.0012665	0.082101	43	2644	282	29181	PGSC0003DMG400030902,PGSC0003DMG400015477,PGSC0003DMG400010999,PGSC0003DMG400013924,PGSC0003DMG400027523,PGSC0003DMG400011541,PGSC0003DMG400000723,PGSC0003DMG400002789,PGSC0003DMG400014614,PGSC0003DMG400030337,PGSC0003DMG402030499,PGSC0003DMG400006160,PGSC0003DMG400006022,PGSC0003DMG400008004,PGSC0003DMG400033650,PGSC0003DMG400033060,PGSC0003DMG400012966,PGSC0003DMG400025750,PGSC0003DMG400010097,…
GO:0015297	antiporter activity	molecular_function	0.0012682	0.082101	31	2644	176	29181	Novel00641,PGSC0003DMG400002123,PGSC0003DMG400016457,PGSC0003DMG400029931,PGSC0003DMG400002944,Novel01970,Novel01971,PGSC0003DMG400005967,Novel01969,PGSC0003DMG400016505,Novel02018,PGSC0003DMG400018618,PGSC0003DMG400016143,PGSC0003DMG400010165,PGSC0003DMG402030515,PGSC0003DMG400004474,PGSC0003DMG400025501,PGSC0003DMG400030630,PGSC0003DMG400012634,PGSC0003DMG400011649,PGSC0003DMG400020391,PGSC0003…
GO:0022857	transmembrane transporter activity	molecular_function	0.0013052	0.083395	273	2644	2427	29181	PGSC0003DMG400028842,PGSC0003DMG400031832,PGSC0003DMG400018515,PGSC0003DMG400014843,PGSC0003DMG400001856,PGSC0003DMG400001419,PGSC0003DMG400011578,PGSC0003DMG400009117,PGSC0003DMG400006919,PGSC0003DMG400011278,PGSC0003DMG400002123,PGSC0003DMG400030701,PGSC0003DMG400028374,PGSC0003DMG400002133,PGSC0003DMG400012434,PGSC0003DMG400028422,PGSC0003DMG400013886,PGSC0003DMG400010833,PGSC0003DMG400009277,…
GO:1901136	carbohydrate derivative catabolic process	biological_process	0.0015244	0.096152	18	2644	88	29181	PGSC0003DMG400026855,PGSC0003DMG400008673,PGSC0003DMG400025063,PGSC0003DMG400019446,PGSC0003DMG400006765,PGSC0003DMG400004800,PGSC0003DMG400000613,PGSC0003DMG400011238,PGSC0003DMG400030683,PGSC0003DMG400017753,PGSC0003DMG400006965,PGSC0003DMG400012712,PGSC0003DMG400020334,PGSC0003DMG400026853,PGSC0003DMG400001528,PGSC0003DMG400025668,Novel00276,PGSC0003DMG400026854
GO:0007281	germ cell development	biological_process	0.0015506	0.096571	12	2644	51	29181	PGSC0003DMG400021163,PGSC0003DMG400030902,PGSC0003DMG400025750,PGSC0003DMG400006088,PGSC0003DMG400012966,PGSC0003DMG400000723,PGSC0003DMG400030337,PGSC0003DMG400002613,PGSC0003DMG400030474,PGSC0003DMG400006160,PGSC0003DMG400030918,PGSC0003DMG400008004
GO:0015144	carbohydrate transmembrane transporter activity	molecular_function	0.0016395	0.099583	21	2644	117	29181	PGSC0003DMG401014249,PGSC0003DMG400005540,PGSC0003DMG400001459,PGSC0003DMG400014183,PGSC0003DMG400009074,PGSC0003DMG400023343,PGSC0003DMG400027384,PGSC0003DMG401003297,PGSC0003DMG400047233,PGSC0003DMG400021023,PGSC0003DMG400021614,PGSC0003DMG400016649,Novel00909,PGSC0003DMG400021068,PGSC0003DMG400028374,PGSC0003DMG400002133,PGSC0003DMG400013282,PGSC0003DMG400033685,PGSC0003DMG400016433,PGSC0003DM…
GO:1901476	carbohydrate transporter activity	molecular_function	0.0016395	0.099583	21	2644	117	29181	PGSC0003DMG400033685,PGSC0003DMG400016433,PGSC0003DMG400011249,PGSC0003DMG400009830,PGSC0003DMG400009074,PGSC0003DMG400014183,PGSC0003DMG400027384,PGSC0003DMG400023343,PGSC0003DMG400005540,PGSC0003DMG401014249,PGSC0003DMG400001459,PGSC0003DMG400016649,Novel00909,PGSC0003DMG400021068,PGSC0003DMG400013282,PGSC0003DMG400002133,PGSC0003DMG400028374,PGSC0003DMG401003297,PGSC0003DMG400047233,PGSC0003DM…
GO:0009095	aromatic amino acid family biosynthetic process, prephenate pathway	biological_process	0.0018539	0.11088	8	2644	25	29181	PGSC0003DMG400030683,PGSC0003DMG400007122,PGSC0003DMG400014543,PGSC0003DMG400016478,PGSC0003DMG400020334,PGSC0003DMG400026536,PGSC0003DMG400023957,PGSC0003DMG400013273
GO:0005215	transporter activity	molecular_function	0.0018706	0.11088	322	2644	2937	29181	PGSC0003DMG401007403,PGSC0003DMG400011937,PGSC0003DMG400011391,PGSC0003DMG400030413,PGSC0003DMG400019268,Novel01971,PGSC0003DMG400017753,PGSC0003DMG400025171,PGSC0003DMG400011768,PGSC0003DMG400021307,PGSC0003DMG400002134,PGSC0003DMG400031145,PGSC0003DMG401030861,PGSC0003DMG400032233,PGSC0003DMG400014467,Novel02668,PGSC0003DMG402030815,PGSC0003DMG400010869,PGSC0003DMG400001459,PGSC0003DMG400023802…
GO:0016755	transferase activity, transferring amino-acyl groups	molecular_function	0.0019485	0.11413	18	2644	89	29181	PGSC0003DMG400000288,Novel01899,PGSC0003DMG400012813,PGSC0003DMG400029803,PGSC0003DMG400005668,PGSC0003DMG400002613,PGSC0003DMG401021549,PGSC0003DMG400031457,PGSC0003DMG400033063,PGSC0003DMG400030097,PGSC0003DMG400013779,PGSC0003DMG400030715,PGSC0003DMG402021564,PGSC0003DMG400028234,PGSC0003DMG400015434,Novel01736,PGSC0003DMG400015607,PGSC0003DMG400005144
GO:0044264	cellular polysaccharide metabolic process	biological_process	0.0020016	0.11529	36	2644	228	29181	PGSC0003DMG402017902,PGSC0003DMG400024060,PGSC0003DMG400010833,PGSC0003DMG400002292,PGSC0003DMG401003156,PGSC0003DMG400007965,PGSC0003DMG400014823,PGSC0003DMG400024755,PGSC0003DMG400015214,PGSC0003DMG400004253,PGSC0003DMG400012852,PGSC0003DMG400004824,Novel03255,PGSC0003DMG400003417,PGSC0003DMG400024627,PGSC0003DMG400017299,PGSC0003DMG400012721,PGSC0003DMG400009883,PGSC0003DMG400029348,PGSC0003DM…
GO:0071704	organic substance metabolic process	biological_process	0.0021047	0.11529	1442	2644	14590	29181	PGSC0003DMG400012143,PGSC0003DMG400025796,PGSC0003DMG400022493,PGSC0003DMG400022026,PGSC0003DMG400012276,PGSC0003DMG400008472,PGSC0003DMG400007943,PGSC0003DMG400023802,PGSC0003DMG400022208,PGSC0003DMG400002927,PGSC0003DMG400000890,PGSC0003DMG400026300,PGSC0003DMG400007613,PGSC0003DMG400047233,PGSC0003DMG400014240,PGSC0003DMG400020294,PGSC0003DMG400026523,PGSC0003DMG400023850,PGSC0003DMG400041508,…
GO:0005976	polysaccharide metabolic process	biological_process	0.0021603	0.11529	43	2644	287	29181	PGSC0003DMG400008447,PGSC0003DMG400017516,PGSC0003DMG400001855,PGSC0003DMG400003067,PGSC0003DMG400017298,PGSC0003DMG400010794,PGSC0003DMG400028538,PGSC0003DMG400002545,PGSC0003DMG401018740,PGSC0003DMG400003866,PGSC0003DMG400027050,PGSC0003DMG400031262,PGSC0003DMG400026516,PGSC0003DMG400001549,PGSC0003DMG400013443,PGSC0003DMG400014024,PGSC0003DMG400002396,PGSC0003DMG400014662,PGSC0003DMG400029938,…
GO:0005750	mitochondrial respiratory chain complex III	cellular_component	0.0021803	0.11529	7	2644	22	29181	PGSC0003DMG400021686,PGSC0003DMG400018535,PGSC0003DMG400026342,PGSC0003DMG400029087,PGSC0003DMG400030941,PGSC0003DMG400016918,PGSC0003DMG400015276
GO:0006122	mitochondrial electron transport, ubiquinol to cytochrome c	biological_process	0.0021803	0.11529	7	2644	22	29181	PGSC0003DMG400015276,PGSC0003DMG400016918,PGSC0003DMG400030941,PGSC0003DMG400029087,PGSC0003DMG400026342,PGSC0003DMG400018535,PGSC0003DMG400021686
GO:0045275	respiratory chain complex III	cellular_component	0.0021803	0.11529	7	2644	22	29181	PGSC0003DMG400029087,PGSC0003DMG400030941,PGSC0003DMG400021686,PGSC0003DMG400026342,PGSC0003DMG400018535,PGSC0003DMG400015276,PGSC0003DMG400016918
GO:0052646	alditol phosphate metabolic process	biological_process	0.0021808	0.11529	10	2644	36	29181	PGSC0003DMG400006965,PGSC0003DMG400006021,PGSC0003DMG400030683,PGSC0003DMG400006765,PGSC0003DMG400004800,PGSC0003DMG400011238,Novel00276,PGSC0003DMG400012712,PGSC0003DMG400017627,PGSC0003DMG400020334
GO:0046149	pigment catabolic process	biological_process	0.0021998	0.11529	16	2644	77	29181	Novel00283,PGSC0003DMG400028124,PGSC0003DMG402023438,PGSC0003DMG400025813,PGSC0003DMG400031845,PGSC0003DMG400033029,PGSC0003DMG400022493,PGSC0003DMG400006709,PGSC0003DMG400025814,PGSC0003DMG400011038,PGSC0003DMG400007233,PGSC0003DMG400019347,PGSC0003DMG400024765,PGSC0003DMG400004629,PGSC0003DMG400021128,PGSC0003DMG400008308
GO:0006720	isoprenoid metabolic process	biological_process	0.0022261	0.11529	27	2644	152	29181	PGSC0003DMG400027856,PGSC0003DMG400022402,PGSC0003DMG400047044,PGSC0003DMG400024860,PGSC0003DMG400022749,PGSC0003DMG400012185,PGSC0003DMG400011238,PGSC0003DMG400004253,PGSC0003DMG400022026,PGSC0003DMG400005886,PGSC0003DMG402001978,PGSC0003DMG402013561,PGSC0003DMG400015673,PGSC0003DMG400012522,PGSC0003DMG400027156,PGSC0003DMG400030454,PGSC0003DMG401014249,PGSC0003DMG400014901,PGSC0003DMG400008690,…
GO:0008299	isoprenoid biosynthetic process	biological_process	0.0022261	0.11529	27	2644	152	29181	PGSC0003DMG400002201,PGSC0003DMG400002921,PGSC0003DMG400029788,PGSC0003DMG400041508,PGSC0003DMG400014901,PGSC0003DMG400030454,PGSC0003DMG401014249,PGSC0003DMG400027156,PGSC0003DMG400022750,PGSC0003DMG400026225,PGSC0003DMG400008690,Novel00910,PGSC0003DMG400004608,PGSC0003DMG402001978,PGSC0003DMG400005886,PGSC0003DMG400022026,PGSC0003DMG400012522,PGSC0003DMG400015673,PGSC0003DMG402013561,PGSC0003DM…
GO:0045333	cellular respiration	biological_process	0.0022424	0.11529	44	2644	299	29181	PGSC0003DMG400030941,PGSC0003DMG400007913,PGSC0003DMG400014624,PGSC0003DMG400018618,PGSC0003DMG400007295,PGSC0003DMG400014183,PGSC0003DMG400007488,PGSC0003DMG400007552,PGSC0003DMG400010084,PGSC0003DMG400021264,PGSC0003DMG400009956,PGSC0003DMG402013561,PGSC0003DMG400002497,PGSC0003DMG400001752,Novel03624,Novel00852,PGSC0003DMG400027086,PGSC0003DMG400006270,PGSC0003DMG400010097,PGSC0003DMG400016918…
GO:0004553	hydrolase activity, hydrolyzing O-glycosyl compounds	molecular_function	0.0022495	0.11529	97	2644	750	29181	PGSC0003DMG400009257,PGSC0003DMG400039856,PGSC0003DMG400019446,PGSC0003DMG400019719,PGSC0003DMG400001549,PGSC0003DMG402000722,PGSC0003DMG401029222,PGSC0003DMG400020321,PGSC0003DMG400003340,PGSC0003DMG400012940,PGSC0003DMG400020017,PGSC0003DMG400013975,PGSC0003DMG400015211,PGSC0003DMG400001209,PGSC0003DMG400012087,PGSC0003DMG400004317,PGSC0003DMG400025931,PGSC0003DMG400001855,PGSC0003DMG400001333,…
GO:0004568	chitinase activity	molecular_function	0.0022851	0.11591	7	2644	21	29181	PGSC0003DMG400008673,PGSC0003DMG400025063,PGSC0003DMG400026854,PGSC0003DMG400001528,PGSC0003DMG400026853,PGSC0003DMG400026855,PGSC0003DMG400017753
GO:0048869	cellular developmental process	biological_process	0.0025152	0.12627	52	2644	363	29181	PGSC0003DMG400027523,PGSC0003DMG400013924,PGSC0003DMG400011541,PGSC0003DMG400022888,PGSC0003DMG400030902,PGSC0003DMG400015477,PGSC0003DMG400010999,PGSC0003DMG400002789,PGSC0003DMG400000723,PGSC0003DMG402030499,PGSC0003DMG400014614,PGSC0003DMG400030337,PGSC0003DMG400008004,PGSC0003DMG400003122,PGSC0003DMG400006160,PGSC0003DMG400006022,PGSC0003DMG400012966,PGSC0003DMG400025750,PGSC0003DMG400033060,…
GO:0004421	hydroxymethylglutaryl-CoA synthase activity	molecular_function	0.0025443	0.12644	5	2644	11	29181	PGSC0003DMG400022402,PGSC0003DMG400004253,PGSC0003DMG400022749,PGSC0003DMG400012522,PGSC0003DMG400022750
GO:0016929	SUMO-specific protease activity	molecular_function	0.002761	0.13062	6	2644	16	29181	PGSC0003DMG400017516,PGSC0003DMG400017753,PGSC0003DMG400030814,PGSC0003DMG400028377,PGSC0003DMG400019587,PGSC0003DMG400023590
GO:0032183	SUMO binding	molecular_function	0.002761	0.13062	6	2644	16	29181	PGSC0003DMG400028377,PGSC0003DMG400019587,PGSC0003DMG400023590,PGSC0003DMG400017753,PGSC0003DMG400030814,PGSC0003DMG400017516
GO:0070122	isopeptidase activity	molecular_function	0.002761	0.13062	6	2644	16	29181	PGSC0003DMG400017516,PGSC0003DMG400030814,PGSC0003DMG400017753,PGSC0003DMG400023590,PGSC0003DMG400028377,PGSC0003DMG400019587
GO:0070138	ubiquitin-like protein-specific isopeptidase activity	molecular_function	0.002761	0.13062	6	2644	16	29181	PGSC0003DMG400028377,PGSC0003DMG400019587,PGSC0003DMG400023590,PGSC0003DMG400017753,PGSC0003DMG400030814,PGSC0003DMG400017516
GO:0070140	SUMO-specific isopeptidase activity	molecular_function	0.002761	0.13062	6	2644	16	29181	PGSC0003DMG400017753,PGSC0003DMG400030814,PGSC0003DMG400017516,PGSC0003DMG400023590,PGSC0003DMG400028377,PGSC0003DMG400019587
GO:0016798	hydrolase activity, acting on glycosyl bonds	molecular_function	0.0030452	0.14269	104	2644	822	29181	PGSC0003DMG400013975,PGSC0003DMG400020017,PGSC0003DMG400012940,PGSC0003DMG400003340,PGSC0003DMG401029222,PGSC0003DMG400020321,PGSC0003DMG400001209,PGSC0003DMG400012087,PGSC0003DMG400015211,PGSC0003DMG400019446,PGSC0003DMG400039856,PGSC0003DMG400009257,PGSC0003DMG402000722,PGSC0003DMG400001549,PGSC0003DMG400019719,PGSC0003DMG400030543,PGSC0003DMG400012288,PGSC0003DMG401012862,PGSC0003DMG400008242,…
GO:1901135	carbohydrate derivative metabolic process	biological_process	0.0032471	0.14939	152	2644	1297	29181	PGSC0003DMG401014605,PGSC0003DMG400001438,PGSC0003DMG400026456,PGSC0003DMG400026854,PGSC0003DMG400004449,PGSC0003DMG400029085,PGSC0003DMG400005494,PGSC0003DMG400008472,PGSC0003DMG400026229,PGSC0003DMG400030509,PGSC0003DMG400018763,PGSC0003DMG400002690,PGSC0003DMG400002904,PGSC0003DMG400012276,PGSC0003DMG400025336,PGSC0003DMG400022026,PGSC0003DMG400012550,PGSC0003DMG402023631,PGSC0003DMG400002291,…
GO:0030269	tetrahydromethanopterin S-methyltransferase activity	molecular_function	0.0032793	0.14939	14	2644	66	29181	PGSC0003DMG400027168,PGSC0003DMG400000896,PGSC0003DMG400025902,PGSC0003DMG400003889,PGSC0003DMG402013561,PGSC0003DMG400010097,PGSC0003DMG400030630,PGSC0003DMG400005668,PGSC0003DMG400019991,PGSC0003DMG400000839,PGSC0003DMG400013408,PGSC0003DMG400014183,PGSC0003DMG400018618,PGSC0003DMG400007295
GO:0042086	5-methyl-5,6,7,8-tetrahydromethanopterin-dependent methyltransferase activity	molecular_function	0.0032793	0.14939	14	2644	66	29181	PGSC0003DMG400019991,PGSC0003DMG400005668,PGSC0003DMG400030630,PGSC0003DMG400010097,PGSC0003DMG400018618,PGSC0003DMG400007295,PGSC0003DMG400000839,PGSC0003DMG400013408,PGSC0003DMG400014183,PGSC0003DMG400027168,PGSC0003DMG400025902,PGSC0003DMG400003889,PGSC0003DMG402013561,PGSC0003DMG400000896
GO:1901565	organonitrogen compound catabolic process	biological_process	0.0033912	0.15236	34	2644	218	29181	PGSC0003DMG400001528,PGSC0003DMG400026854,PGSC0003DMG400025668,PGSC0003DMG400011038,PGSC0003DMG400025471,PGSC0003DMG400023115,PGSC0003DMG400008308,PGSC0003DMG400004629,PGSC0003DMG400031845,PGSC0003DMG400033029,Novel00283,PGSC0003DMG402023438,PGSC0003DMG400025814,PGSC0003DMG400025063,PGSC0003DMG400022493,PGSC0003DMG400006709,PGSC0003DMG400026855,PGSC0003DMG400013879,PGSC0003DMG400026853,PGSC0003DM…
GO:0006787	porphyrin-containing compound catabolic process	biological_process	0.0034373	0.15236	16	2644	80	29181	PGSC0003DMG402023438,Novel00283,PGSC0003DMG400028124,PGSC0003DMG400031845,PGSC0003DMG400033029,PGSC0003DMG400025813,PGSC0003DMG400022493,PGSC0003DMG400006709,PGSC0003DMG400025814,PGSC0003DMG400011038,PGSC0003DMG400019347,PGSC0003DMG400024765,PGSC0003DMG400007233,PGSC0003DMG400021128,PGSC0003DMG400004629,PGSC0003DMG400008308
GO:0033015	tetrapyrrole catabolic process	biological_process	0.0034373	0.15236	16	2644	80	29181	PGSC0003DMG400011038,PGSC0003DMG400019347,PGSC0003DMG400024765,PGSC0003DMG400007233,PGSC0003DMG400021128,PGSC0003DMG400004629,PGSC0003DMG400008308,PGSC0003DMG402023438,Novel00283,PGSC0003DMG400028124,PGSC0003DMG400031845,PGSC0003DMG400033029,PGSC0003DMG400025813,PGSC0003DMG400022493,PGSC0003DMG400006709,PGSC0003DMG400025814
GO:0007128	meiotic prophase I	biological_process	0.0037153	0.15895	6	2644	17	29181	PGSC0003DMG400011655,PGSC0003DMG400015015,PGSC0003DMG400016441,PGSC0003DMG400028633,PGSC0003DMG400022063,PGSC0003DMG400000227
GO:0051324	prophase	biological_process	0.0037153	0.15895	6	2644	17	29181	PGSC0003DMG400028633,PGSC0003DMG400000227,PGSC0003DMG400022063,PGSC0003DMG400011655,PGSC0003DMG400016441,PGSC0003DMG400015015
GO:0098762	meiotic cell cycle phase	biological_process	0.0037153	0.15895	6	2644	17	29181	PGSC0003DMG400028633,PGSC0003DMG400000227,PGSC0003DMG400022063,PGSC0003DMG400011655,PGSC0003DMG400016441,PGSC0003DMG400015015
GO:0098764	meiosis I cell cycle phase	biological_process	0.0037153	0.15895	6	2644	17	29181	PGSC0003DMG400011655,PGSC0003DMG400015015,PGSC0003DMG400016441,PGSC0003DMG400028633,PGSC0003DMG400022063,PGSC0003DMG400000227
GO:0060429	epithelium development	biological_process	0.0038247	0.16222	11	2644	48	29181	PGSC0003DMG400000723,PGSC0003DMG401020908,PGSC0003DMG400006088,PGSC0003DMG400012966,PGSC0003DMG400030902,PGSC0003DMG400008004,PGSC0003DMG400030918,PGSC0003DMG400006160,PGSC0003DMG400030474,PGSC0003DMG400001461,PGSC0003DMG400020906
GO:0005739	mitochondrion	cellular_component	0.0039406	0.16343	116	2644	987	29181	PGSC0003DMG400031755,PGSC0003DMG400008961,PGSC0003DMG400022358,PGSC0003DMG400025134,PGSC0003DMG400008270,PGSC0003DMG400029788,PGSC0003DMG400018430,PGSC0003DMG400029794,PGSC0003DMG400029803,PGSC0003DMG400029967,PGSC0003DMG400030630,PGSC0003DMG400030439,PGSC0003DMG400004449,PGSC0003DMG400030058,PGSC0003DMG400000864,PGSC0003DMG401017657,PGSC0003DMG400015599,PGSC0003DMG400015909,PGSC0003DMG400020819,…
GO:0004672	protein kinase activity	molecular_function	0.0039558	0.16343	225	2644	1869	29181	PGSC0003DMG400009068,PGSC0003DMG401022117,PGSC0003DMG400012903,PGSC0003DMG400012451,PGSC0003DMG400022815,PGSC0003DMG403005720,PGSC0003DMG400006639,PGSC0003DMG400030219,PGSC0003DMG400001566,PGSC0003DMG400016015,PGSC0003DMG400009985,PGSC0003DMG400008907,PGSC0003DMG400015391,PGSC0003DMG400025848,PGSC0003DMG400047346,PGSC0003DMG401031064,PGSC0003DMG400000227,PGSC0003DMG400016709,PGSC0003DMG400037460,…
GO:0015711	organic anion transport	biological_process	0.0039788	0.16343	33	2644	218	29181	PGSC0003DMG400001410,PGSC0003DMG400023518,PGSC0003DMG400014203,PGSC0003DMG400013886,PGSC0003DMG400008270,PGSC0003DMG400008360,PGSC0003DMG400020427,PGSC0003DMG400002539,PGSC0003DMG400003574,PGSC0003DMG400020266,PGSC0003DMG400006021,PGSC0003DMG400011771,PGSC0003DMG400032226,PGSC0003DMG400030568,PGSC0003DMG400016803,PGSC0003DMG400026982,PGSC0003DMG400021102,PGSC0003DMG400012255,PGSC0003DMG400024998,…
GO:0016679	oxidoreductase activity, acting on diphenols and related substances as donors	molecular_function	0.0039976	0.16343	22	2644	124	29181	PGSC0003DMG401009709,PGSC0003DMG400007614,PGSC0003DMG400002703,PGSC0003DMG400008447,PGSC0003DMG400015711,PGSC0003DMG400007613,PGSC0003DMG400000464,PGSC0003DMG400029575,PGSC0003DMG400018914,PGSC0003DMG400018916,PGSC0003DMG400006405,PGSC0003DMG400029576,PGSC0003DMG400010231,PGSC0003DMG400032789,PGSC0003DMG400026494,PGSC0003DMG400002730,PGSC0003DMG400010833,PGSC0003DMG400020426,PGSC0003DMG400002678,…
GO:0006040	amino sugar metabolic process	biological_process	0.0040194	0.16343	13	2644	61	29181	PGSC0003DMG400012721,PGSC0003DMG400026854,PGSC0003DMG400001528,PGSC0003DMG400026853,PGSC0003DMG400005896,PGSC0003DMG400008673,PGSC0003DMG400002904,PGSC0003DMG400025063,PGSC0003DMG400026855,PGSC0003DMG400032789,PGSC0003DMG400017753,PGSC0003DMG400001438,PGSC0003DMG400012550
GO:0045229	external encapsulating structure organization	biological_process	0.0040845	0.16472	29	2644	181	29181	PGSC0003DMG400011238,PGSC0003DMG400031816,PGSC0003DMG400000783,PGSC0003DMG400028904,PGSC0003DMG402023533,PGSC0003DMG400002292,PGSC0003DMG400025627,PGSC0003DMG400028675,PGSC0003DMG400007965,PGSC0003DMG400002075,PGSC0003DMG400002085,PGSC0003DMG400023822,PGSC0003DMG400010833,PGSC0003DMG400011246,PGSC0003DMG400002074,PGSC0003DMG400000778,PGSC0003DMG400000776,PGSC0003DMG400003574,PGSC0003DMG400027954,…
GO:0031967	organelle envelope	cellular_component	0.0041183	0.16473	91	2644	750	29181	PGSC0003DMG400028214,PGSC0003DMG400007552,PGSC0003DMG402028101,PGSC0003DMG400010869,Novel02679,PGSC0003DMG400012255,PGSC0003DMG400022391,PGSC0003DMG400030814,PGSC0003DMG402031322,PGSC0003DMG400015276,PGSC0003DMG400012616,PGSC0003DMG400006896,PGSC0003DMG400013268,PGSC0003DMG400030941,PGSC0003DMG401022600,PGSC0003DMG400011731,PGSC0003DMG400024763,PGSC0003DMG402003179,PGSC0003DMG400025587,Novel01266…
GO:0008198	ferrous iron binding	molecular_function	0.0042445	0.16841	4	2644	8	29181	PGSC0003DMG400021563,PGSC0003DMG400025377,PGSC0003DMG400019456,PGSC0003DMG400042273
GO:0015980	energy derivation by oxidation of organic compounds	biological_process	0.0044784	0.17627	47	2644	333	29181	PGSC0003DMG400018618,PGSC0003DMG400007295,PGSC0003DMG400014183,PGSC0003DMG400007913,PGSC0003DMG400014624,PGSC0003DMG400018987,PGSC0003DMG400030941,PGSC0003DMG400015276,PGSC0003DMG400016918,PGSC0003DMG400000839,Novel03624,PGSC0003DMG400001752,Novel00852,PGSC0003DMG400027086,PGSC0003DMG400010097,PGSC0003DMG400006270,PGSC0003DMG402013561,PGSC0003DMG400002497,PGSC0003DMG400007488,PGSC0003DMG400010084…
GO:0006026	aminoglycan catabolic process	biological_process	0.0047875	0.18694	9	2644	36	29181	PGSC0003DMG400019446,PGSC0003DMG400026853,PGSC0003DMG400001528,PGSC0003DMG400025668,PGSC0003DMG400026854,PGSC0003DMG400026855,PGSC0003DMG400017753,PGSC0003DMG400008673,PGSC0003DMG400025063
GO:0022412	cellular process involved in reproduction in multicellular organism	biological_process	0.0048615	0.18833	16	2644	86	29181	PGSC0003DMG400012966,PGSC0003DMG400006088,PGSC0003DMG400025750,PGSC0003DMG400020622,PGSC0003DMG400021163,PGSC0003DMG400020158,PGSC0003DMG400030902,PGSC0003DMG400000723,PGSC0003DMG400030474,PGSC0003DMG400002613,PGSC0003DMG400030337,PGSC0003DMG400008004,PGSC0003DMG400036493,PGSC0003DMG400006160,PGSC0003DMG400030918,PGSC0003DMG400005426
GO:0019773	proteasome core complex, alpha-subunit complex	cellular_component	0.0049587	0.18978	10	2644	43	29181	PGSC0003DMG400022391,PGSC0003DMG402019187,PGSC0003DMG400021163,PGSC0003DMG400022748,PGSC0003DMG400000330,PGSC0003DMG400009650,PGSC0003DMG400002904,PGSC0003DMG400020441,PGSC0003DMG401021929,PGSC0003DMG400015462
GO:0051187	cofactor catabolic process	biological_process	0.0049759	0.18978	16	2644	83	29181	PGSC0003DMG400006709,PGSC0003DMG400022493,PGSC0003DMG400025814,PGSC0003DMG402023438,Novel00283,PGSC0003DMG400028124,PGSC0003DMG400031845,PGSC0003DMG400033029,PGSC0003DMG400025813,PGSC0003DMG400021128,PGSC0003DMG400004629,PGSC0003DMG400008308,PGSC0003DMG400011038,PGSC0003DMG400019347,PGSC0003DMG400024765,PGSC0003DMG400007233
GO:0071555	cell wall organization	biological_process	0.0051747	0.19451	26	2644	159	29181	PGSC0003DMG400028904,PGSC0003DMG400011238,PGSC0003DMG400031816,PGSC0003DMG400000783,PGSC0003DMG402023533,PGSC0003DMG400028675,PGSC0003DMG400025627,PGSC0003DMG400002075,PGSC0003DMG400023822,PGSC0003DMG400002085,PGSC0003DMG400000778,PGSC0003DMG400000776,PGSC0003DMG400003574,PGSC0003DMG400011246,PGSC0003DMG400002074,PGSC0003DMG400027954,PGSC0003DMG401024899,PGSC0003DMG402028784,PGSC0003DMG400015933,…
GO:1901564	organonitrogen compound metabolic process	biological_process	0.0052018	0.19451	391	2644	3713	29181	PGSC0003DMG400014592,PGSC0003DMG400027030,PGSC0003DMG400031065,PGSC0003DMG400008751,Novel02061,PGSC0003DMG400023975,PGSC0003DMG400000301,PGSC0003DMG400025931,PGSC0003DMG400011195,PGSC0003DMG400012813,PGSC0003DMG400007707,PGSC0003DMG400023667,PGSC0003DMG400020720,PGSC0003DMG402000669,PGSC0003DMG400012034,PGSC0003DMG400016918,PGSC0003DMG400002852,PGSC0003DMG400019247,PGSC0003DMG401012965,PGSC0003DM…
GO:0006030	chitin metabolic process	biological_process	0.005258	0.19451	10	2644	43	29181	PGSC0003DMG400026854,PGSC0003DMG400026853,PGSC0003DMG400001528,PGSC0003DMG400005896,PGSC0003DMG400008673,PGSC0003DMG400025063,PGSC0003DMG400026855,PGSC0003DMG400032789,PGSC0003DMG400017753,PGSC0003DMG400001438
GO:1901071	glucosamine-containing compound metabolic process	biological_process	0.005258	0.19451	10	2644	43	29181	PGSC0003DMG400026853,PGSC0003DMG400001528,PGSC0003DMG400026854,PGSC0003DMG400005896,PGSC0003DMG400025063,PGSC0003DMG400008673,PGSC0003DMG400001438,PGSC0003DMG400026855,PGSC0003DMG400032789,PGSC0003DMG400017753
GO:0030955	potassium ion binding	molecular_function	0.0053489	0.19494	8	2644	30	29181	PGSC0003DMG400023512,PGSC0003DMG400019247,PGSC0003DMG400001780,PGSC0003DMG400030373,PGSC0003DMG400008936,PGSC0003DMG400028177,PGSC0003DMG401004716,PGSC0003DMG400002690
GO:0031420	alkali metal ion binding	molecular_function	0.0053489	0.19494	8	2644	30	29181	PGSC0003DMG400008936,PGSC0003DMG400030373,PGSC0003DMG400028177,PGSC0003DMG401004716,PGSC0003DMG400002690,PGSC0003DMG400023512,PGSC0003DMG400019247,PGSC0003DMG400001780
GO:0006778	porphyrin-containing compound metabolic process	biological_process	0.0054033	0.19495	37	2644	248	29181	Novel01240,PGSC0003DMG400025813,Novel03619,PGSC0003DMG400028124,Novel03103,PGSC0003DMG402001978,PGSC0003DMG400022405,PGSC0003DMG400018665,PGSC0003DMG402028101,PGSC0003DMG401021138,PGSC0003DMG400024765,PGSC0003DMG400019347,PGSC0003DMG400023975,PGSC0003DMG400007233,PGSC0003DMG400017756,PGSC0003DMG400009887,PGSC0003DMG400029591,PGSC0003DMG400004572,PGSC0003DMG400002201,PGSC0003DMG400021128,PGSC0003D…
GO:0006796	phosphate-containing compound metabolic process	biological_process	0.0054284	0.19495	327	2644	2888	29181	PGSC0003DMG400012997,PGSC0003DMG400012659,PGSC0003DMG400022507,PGSC0003DMG400010084,PGSC0003DMG402028101,PGSC0003DMG400022318,PGSC0003DMG400030462,PGSC0003DMG400033650,PGSC0003DMG400011044,PGSC0003DMG400004401,PGSC0003DMG400022200,PGSC0003DMG400028904,PGSC0003DMG400010485,PGSC0003DMG400015276,PGSC0003DMG400028124,PGSC0003DMG400026384,PGSC0003DMG400001752,Novel01632,PGSC0003DMG402019416,PGSC0003DM…
GO:0016310	phosphorylation	biological_process	0.0055431	0.19625	218	2644	1817	29181	PGSC0003DMG400003429,PGSC0003DMG400025471,PGSC0003DMG400018672,Novel00663,PGSC0003DMG400011015,PGSC0003DMG401033880,PGSC0003DMG400025668,PGSC0003DMG400008404,PGSC0003DMG400018184,PGSC0003DMG400012910,PGSC0003DMG400001066,PGSC0003DMG402014186,PGSC0003DMG400015021,PGSC0003DMG400010032,PGSC0003DMG400009180,PGSC0003DMG400029075,PGSC0003DMG400041071,Novel01647,PGSC0003DMG400021034,Novel03146,PGSC0003D…
GO:0039624	viral outer capsid	cellular_component	0.0055744	0.19625	4	2644	8	29181	PGSC0003DMG400025587,PGSC0003DMG403018293,PGSC0003DMG400013485,PGSC0003DMG400003574
GO:0050664	oxidoreductase activity, acting on NAD(P)H, oxygen as acceptor	molecular_function	0.0055842	0.19625	6	2644	17	29181	PGSC0003DMG400019991,PGSC0003DMG400014168,Novel02552,Novel03252,Novel02721,PGSC0003DMG400024754
GO:0006072	glycerol-3-phosphate metabolic process	biological_process	0.0058001	0.20096	8	2644	29	29181	PGSC0003DMG400012712,PGSC0003DMG400020334,PGSC0003DMG400006765,PGSC0003DMG400004800,PGSC0003DMG400011238,Novel00276,PGSC0003DMG400030683,PGSC0003DMG400006965
GO:0046168	glycerol-3-phosphate catabolic process	biological_process	0.0058001	0.20096	8	2644	29	29181	PGSC0003DMG400006965,PGSC0003DMG400030683,PGSC0003DMG400006765,PGSC0003DMG400004800,PGSC0003DMG400011238,Novel00276,PGSC0003DMG400020334,PGSC0003DMG400012712
GO:0008643	carbohydrate transport	biological_process	0.0062327	0.21444	28	2644	189	29181	PGSC0003DMG400016649,PGSC0003DMG400004824,PGSC0003DMG400002133,PGSC0003DMG400013282,PGSC0003DMG400028374,Novel00909,PGSC0003DMG400021068,PGSC0003DMG400047233,PGSC0003DMG401003297,PGSC0003DMG400021614,PGSC0003DMG400026246,PGSC0003DMG400021023,PGSC0003DMG400009074,PGSC0003DMG400014183,PGSC0003DMG400027384,PGSC0003DMG400023343,PGSC0003DMG400004437,PGSC0003DMG400005540,PGSC0003DMG401014249,PGSC0003DM…
GO:0051186	cofactor metabolic process	biological_process	0.0064754	0.21688	88	2644	699	29181	PGSC0003DMG400005961,PGSC0003DMG401021138,PGSC0003DMG400006594,PGSC0003DMG400005246,PGSC0003DMG400018665,PGSC0003DMG401011372,PGSC0003DMG401029222,PGSC0003DMG400022405,PGSC0003DMG400022268,PGSC0003DMG400025813,PGSC0003DMG400019247,PGSC0003DMG400028287,PGSC0003DMG400023608,PGSC0003DMG400018793,PGSC0003DMG400002201,PGSC0003DMG400012900,PGSC0003DMG400016535,PGSC0003DMG400006871,PGSC0003DMG400023975,…
GO:0040007	growth	biological_process	0.0064826	0.21688	16	2644	82	29181	Novel01842,PGSC0003DMG400006286,PGSC0003DMG400026565,PGSC0003DMG400020335,PGSC0003DMG400024617,PGSC0003DMG400000890,PGSC0003DMG400030229,PGSC0003DMG400014013,PGSC0003DMG400002075,PGSC0003DMG400030134,PGSC0003DMG400025627,PGSC0003DMG400004470,PGSC0003DMG400000936,PGSC0003DMG401014218,PGSC0003DMG400024616,PGSC0003DMG400033650
GO:0016773	phosphotransferase activity, alcohol group as acceptor	molecular_function	0.0065192	0.21688	264	2644	2266	29181	PGSC0003DMG400027149,PGSC0003DMG400009743,PGSC0003DMG400029941,PGSC0003DMG400006391,PGSC0003DMG400030058,PGSC0003DMG400012569,PGSC0003DMG400005494,PGSC0003DMG400027954,PGSC0003DMG400002690,PGSC0003DMG400002904,PGSC0003DMG400025808,PGSC0003DMG400004930,Novel00545,PGSC0003DMG402023631,PGSC0003DMG401028570,PGSC0003DMG400006088,PGSC0003DMG400013714,PGSC0003DMG400005896,PGSC0003DMG400023440,PGSC0003DM…
GO:0008172	S-methyltransferase activity	molecular_function	0.006959	0.21688	16	2644	87	29181	PGSC0003DMG400010097,PGSC0003DMG400028127,PGSC0003DMG400019991,PGSC0003DMG400000839,PGSC0003DMG400006955,PGSC0003DMG400027168,PGSC0003DMG400025902,PGSC0003DMG400003889,PGSC0003DMG402013561,PGSC0003DMG400005668,PGSC0003DMG400030630,PGSC0003DMG400013408,PGSC0003DMG400014183,PGSC0003DMG400018618,PGSC0003DMG400007295,PGSC0003DMG400000896
GO:0004664	prephenate dehydratase activity	molecular_function	0.0070012	0.21688	5	2644	14	29181	PGSC0003DMG400007122,PGSC0003DMG400016478,PGSC0003DMG400013273,PGSC0003DMG400014543,PGSC0003DMG400026536
GO:0009094	L-phenylalanine biosynthetic process	biological_process	0.0070012	0.21688	5	2644	14	29181	PGSC0003DMG400014543,PGSC0003DMG400026536,PGSC0003DMG400013273,PGSC0003DMG400016478,PGSC0003DMG400007122
GO:1902223	erythrose 4-phosphate/phosphoenolpyruvate family amino acid biosynthetic process	biological_process	0.0070012	0.21688	5	2644	14	29181	PGSC0003DMG400013273,PGSC0003DMG400014543,PGSC0003DMG400026536,PGSC0003DMG400007122,PGSC0003DMG400016478
GO:0002064	epithelial cell development	biological_process	0.007009	0.21688	8	2644	32	29181	PGSC0003DMG400000723,PGSC0003DMG400030902,PGSC0003DMG400012966,PGSC0003DMG400006088,PGSC0003DMG400006160,PGSC0003DMG400030918,PGSC0003DMG400008004,PGSC0003DMG400030474
GO:0002065	columnar/cuboidal epithelial cell differentiation	biological_process	0.007009	0.21688	8	2644	32	29181	PGSC0003DMG400030918,PGSC0003DMG400006160,PGSC0003DMG400008004,PGSC0003DMG400030474,PGSC0003DMG400000723,PGSC0003DMG400030902,PGSC0003DMG400006088,PGSC0003DMG400012966
GO:0002066	columnar/cuboidal epithelial cell development	biological_process	0.007009	0.21688	8	2644	32	29181	PGSC0003DMG400000723,PGSC0003DMG400030902,PGSC0003DMG400006088,PGSC0003DMG400012966,PGSC0003DMG400030918,PGSC0003DMG400006160,PGSC0003DMG400008004,PGSC0003DMG400030474
GO:0005213	structural constituent of chorion	molecular_function	0.007009	0.21688	8	2644	32	29181	PGSC0003DMG400030902,PGSC0003DMG400012966,PGSC0003DMG400006088,PGSC0003DMG400000723,PGSC0003DMG400030474,PGSC0003DMG400030918,PGSC0003DMG400006160,PGSC0003DMG400008004
GO:0007292	female gamete generation	biological_process	0.007009	0.21688	8	2644	32	29181	PGSC0003DMG400030474,PGSC0003DMG400030918,PGSC0003DMG400006160,PGSC0003DMG400008004,PGSC0003DMG400030902,PGSC0003DMG400012966,PGSC0003DMG400006088,PGSC0003DMG400000723
GO:0007304	chorion-containing eggshell formation	biological_process	0.007009	0.21688	8	2644	32	29181	PGSC0003DMG400030474,PGSC0003DMG400006160,PGSC0003DMG400030918,PGSC0003DMG400008004,PGSC0003DMG400030902,PGSC0003DMG400006088,PGSC0003DMG400012966,PGSC0003DMG400000723
GO:0030703	eggshell formation	biological_process	0.007009	0.21688	8	2644	32	29181	PGSC0003DMG400006160,PGSC0003DMG400030918,PGSC0003DMG400008004,PGSC0003DMG400030474,PGSC0003DMG400000723,PGSC0003DMG400030902,PGSC0003DMG400006088,PGSC0003DMG400012966
GO:0030707	ovarian follicle cell development	biological_process	0.007009	0.21688	8	2644	32	29181	PGSC0003DMG400030474,PGSC0003DMG400008004,PGSC0003DMG400030918,PGSC0003DMG400006160,PGSC0003DMG400006088,PGSC0003DMG400012966,PGSC0003DMG400030902,PGSC0003DMG400000723
GO:0048477	oogenesis	biological_process	0.007009	0.21688	8	2644	32	29181	PGSC0003DMG400006088,PGSC0003DMG400012966,PGSC0003DMG400030902,PGSC0003DMG400000723,PGSC0003DMG400030474,PGSC0003DMG400008004,PGSC0003DMG400030918,PGSC0003DMG400006160
GO:0008514	organic anion transmembrane transporter activity	molecular_function	0.0072363	0.22252	19	2644	108	29181	PGSC0003DMG400013886,PGSC0003DMG400000129,PGSC0003DMG400021102,PGSC0003DMG400032226,PGSC0003DMG400030568,PGSC0003DMG400007597,PGSC0003DMG400024754,PGSC0003DMG400024998,PGSC0003DMG400001410,PGSC0003DMG400009074,PGSC0003DMG400032227,PGSC0003DMG400002539,PGSC0003DMG400017298,PGSC0003DMG400008311,PGSC0003DMG400007784,PGSC0003DMG400012516,PGSC0003DMG400025523,PGSC0003DMG400013282,PGSC0003DMG400020427
GO:0006793	phosphorus metabolic process	biological_process	0.0073496	0.2246	327	2644	2904	29181	PGSC0003DMG400027771,PGSC0003DMG400002327,Novel02377,PGSC0003DMG400026342,PGSC0003DMG400037460,PGSC0003DMG400021686,PGSC0003DMG400026246,PGSC0003DMG400022139,PGSC0003DMG400033029,PGSC0003DMG400020253,PGSC0003DMG400009985,PGSC0003DMG400018535,PGSC0003DMG400016015,PGSC0003DMG400025848,PGSC0003DMG403005720,PGSC0003DMG400024591,PGSC0003DMG401022117,PGSC0003DMG400009405,PGSC0003DMG400022911,PGSC0003DM…
GO:0009888	tissue development	biological_process	0.0074053	0.2249	19	2644	110	29181	PGSC0003DMG400030902,PGSC0003DMG400000723,PGSC0003DMG401020908,PGSC0003DMG400003266,PGSC0003DMG400030474,PGSC0003DMG400020335,PGSC0003DMG400030918,PGSC0003DMG400006160,PGSC0003DMG400008004,PGSC0003DMG400033650,PGSC0003DMG400006088,PGSC0003DMG400027012,PGSC0003DMG400012966,PGSC0003DMG401014218,PGSC0003DMG400004470,PGSC0003DMG400020906,PGSC0003DMG400001461,PGSC0003DMG400030134,PGSC0003DMG400030229
GO:0004800	thyroxine 5'-deiodinase activity	molecular_function	0.007654	0.23103	4	2644	9	29181	PGSC0003DMG400001410,PGSC0003DMG400001823,PGSC0003DMG400015607,PGSC0003DMG400016843
GO:0015994	chlorophyll metabolic process	biological_process	0.0077295	0.23188	20	2644	116	29181	PGSC0003DMG400025814,PGSC0003DMG400022493,PGSC0003DMG400006709,PGSC0003DMG400025813,PGSC0003DMG400033029,PGSC0003DMG400031845,PGSC0003DMG400026114,PGSC0003DMG400028124,Novel00283,PGSC0003DMG402023438,PGSC0003DMG400008308,PGSC0003DMG400009887,PGSC0003DMG400004629,PGSC0003DMG400021128,PGSC0003DMG400017020,PGSC0003DMG400007233,PGSC0003DMG400024765,PGSC0003DMG400019347,PGSC0003DMG400011038,PGSC0003DM…
GO:0031090	organelle membrane	cellular_component	0.0077789	0.23195	154	2644	1372	29181	PGSC0003DMG400027509,PGSC0003DMG400012640,PGSC0003DMG400003487,PGSC0003DMG400029087,PGSC0003DMG400004924,PGSC0003DMG400022139,PGSC0003DMG400004696,PGSC0003DMG400021686,PGSC0003DMG400026342,PGSC0003DMG400007316,Novel01580,PGSC0003DMG400016015,PGSC0003DMG400018535,PGSC0003DMG400024591,Novel03389,PGSC0003DMG400025747,PGSC0003DMG400009405,PGSC0003DMG400025931,PGSC0003DMG400000301,PGSC0003DMG400012807…
GO:0044877	macromolecular complex binding	molecular_function	0.0079666	0.23499	67	2644	518	29181	PGSC0003DMG400023964,PGSC0003DMG400013645,PGSC0003DMG400033906,PGSC0003DMG400028925,PGSC0003DMG400007295,PGSC0003DMG400011167,PGSC0003DMG400001077,PGSC0003DMG400029298,PGSC0003DMG400025931,PGSC0003DMG400030000,PGSC0003DMG400030006,PGSC0003DMG400027269,PGSC0003DMG400008029,PGSC0003DMG400018509,PGSC0003DMG400008945,PGSC0003DMG400013514,PGSC0003DMG400006621,PGSC0003DMG400001307,PGSC0003DMG400028374,…
GO:0043229	intracellular organelle	cellular_component	0.0079764	0.23499	681	2644	6835	29181	PGSC0003DMG402013278,PGSC0003DMG400021143,PGSC0003DMG400008961,PGSC0003DMG400013334,PGSC0003DMG400013485,PGSC0003DMG400002807,PGSC0003DMG400004422,PGSC0003DMG400029803,PGSC0003DMG400008079,PGSC0003DMG400000231,PGSC0003DMG400028388,PGSC0003DMG400022399,PGSC0003DMG400011168,PGSC0003DMG400014854,PGSC0003DMG400001326,PGSC0003DMG400002796,PGSC0003DMG400017627,PGSC0003DMG400008000,PGSC0003DMG400014614,…
GO:0009856	pollination	biological_process	0.0081532	0.23515	18	2644	89	29181	PGSC0003DMG400026155,PGSC0003DMG400013885,Novel01985,PGSC0003DMG400017330,PGSC0003DMG400024260,Novel00663,Novel01501,PGSC0003DMG400024998,PGSC0003DMG400011251,PGSC0003DMG400004930,PGSC0003DMG400017331,PGSC0003DMG400001059,PGSC0003DMG400013886,Novel00172,PGSC0003DMG401028902,PGSC0003DMG400026154,PGSC0003DMG400003313,PGSC0003DMG400022391
GO:0009875	pollen-pistil interaction	biological_process	0.0081532	0.23515	18	2644	89	29181	PGSC0003DMG400013885,PGSC0003DMG400026155,Novel01985,PGSC0003DMG400024260,PGSC0003DMG400017330,Novel00663,Novel01501,PGSC0003DMG400024998,PGSC0003DMG400004930,PGSC0003DMG400011251,PGSC0003DMG400001059,PGSC0003DMG400017331,PGSC0003DMG400013886,Novel00172,PGSC0003DMG400026154,PGSC0003DMG401028902,PGSC0003DMG400003313,PGSC0003DMG400022391
GO:0048544	recognition of pollen	biological_process	0.0081532	0.23515	18	2644	89	29181	PGSC0003DMG400003313,PGSC0003DMG400022391,Novel00172,PGSC0003DMG400013886,PGSC0003DMG400026154,PGSC0003DMG401028902,PGSC0003DMG400017331,PGSC0003DMG400001059,PGSC0003DMG400024998,PGSC0003DMG400011251,PGSC0003DMG400004930,Novel00663,Novel01501,PGSC0003DMG400024260,PGSC0003DMG400017330,Novel01985,PGSC0003DMG400026155,PGSC0003DMG400013885
GO:0000795	synaptonemal complex	cellular_component	0.0082063	0.23515	6	2644	20	29181	PGSC0003DMG400016441,PGSC0003DMG400015015,PGSC0003DMG400011655,PGSC0003DMG400000227,PGSC0003DMG400022063,PGSC0003DMG400028633
GO:0009987	cellular process	biological_process	0.0082361	0.23515	1687	2644	17514	29181	PGSC0003DMG400020080,PGSC0003DMG400014560,PGSC0003DMG400021034,PGSC0003DMG400033685,PGSC0003DMG400021507,PGSC0003DMG400003803,PGSC0003DMG400012290,Novel01890,PGSC0003DMG400030134,PGSC0003DMG400015599,PGSC0003DMG400003889,PGSC0003DMG400004285,PGSC0003DMG400016003,PGSC0003DMG400032135,PGSC0003DMG400007503,PGSC0003DMG400018583,PGSC0003DMG400025668,PGSC0003DMG400000791,PGSC0003DMG400002921,PGSC0003DM…
400025743,PGSC0003DMG401004033,PGSC0003DMG400026035,PGSC0003DMG400000728,PGSC0003DMG400018331,PGSC0003DMG400021264,PGSC0003DMG400008169,PGSC0003DMG400035836,PGSC0003DMG400005418,PGSC0003DMG400003343,PGSC0003DMG400030568,PGSC0003DMG400032498,PGSC0003DMG400025055,PGSC0003DMG401014249,PGSC0003DMG402003179,PGSC0003DMG400030662,PGSC0003DMG401030725,PGSC0003DMG400009965,Novel01842,PGSC0003DMG400006176,…
GO:1902495	transmembrane transporter complex	cellular_component	0.00833	0.23515	14	2644	75	29181	PGSC0003DMG400011721,PGSC0003DMG400015276,PGSC0003DMG400016918,PGSC0003DMG400018535,PGSC0003DMG402024734,PGSC0003DMG401009709,PGSC0003DMG401028367,PGSC0003DMG400029915,PGSC0003DMG400005160,PGSC0003DMG400021686,PGSC0003DMG400026342,PGSC0003DMG400029087,PGSC0003DMG400018131,PGSC0003DMG400030941
GO:1990351	transporter complex	cellular_component	0.00833	0.23515	14	2644	75	29181	PGSC0003DMG400016918,PGSC0003DMG400015276,PGSC0003DMG400011721,PGSC0003DMG401009709,PGSC0003DMG400018535,PGSC0003DMG402024734,PGSC0003DMG401028367,PGSC0003DMG400029915,PGSC0003DMG400030941,PGSC0003DMG400018131,PGSC0003DMG400029087,PGSC0003DMG400026342,PGSC0003DMG400021686,PGSC0003DMG400005160
GO:0022891	substrate-specific transmembrane transporter activity	molecular_function	0.0083642	0.23515	214	2644	1957	29181	PGSC0003DMG400009277,PGSC0003DMG400001508,PGSC0003DMG400010833,PGSC0003DMG400017226,PGSC0003DMG400025035,PGSC0003DMG400014312,PGSC0003DMG400010174,PGSC0003DMG400024981,PGSC0003DMG400012434,PGSC0003DMG400028422,PGSC0003DMG400013886,PGSC0003DMG400011578,PGSC0003DMG400009117,PGSC0003DMG400009177,PGSC0003DMG400011278,PGSC0003DMG400002133,PGSC0003DMG400030701,PGSC0003DMG400028374,PGSC0003DMG400006919,…
GO:0044283	small molecule biosynthetic process	biological_process	0.0084745	0.2369	93	2644	755	29181	PGSC0003DMG400012522,PGSC0003DMG400024591,PGSC0003DMG400026494,PGSC0003DMG400012903,PGSC0003DMG400032250,PGSC0003DMG400020601,PGSC0003DMG400010819,PGSC0003DMG400024204,PGSC0003DMG400003755,PGSC0003DMG400019432,PGSC0003DMG400028127,PGSC0003DMG400026132,PGSC0003DMG400014543,PGSC0003DMG400021456,PGSC0003DMG400007122,PGSC0003DMG400011218,PGSC0003DMG400008551,PGSC0003DMG400022750,PGSC0003DMG400019677,…
GO:0009061	anaerobic respiration	biological_process	0.0087063	0.242	20	2644	119	29181	PGSC0003DMG400001854,PGSC0003DMG400000896,PGSC0003DMG400007295,PGSC0003DMG400018618,PGSC0003DMG400014183,PGSC0003DMG400013408,PGSC0003DMG400030630,PGSC0003DMG402013561,PGSC0003DMG400003889,PGSC0003DMG400015909,PGSC0003DMG400007488,PGSC0003DMG400028406,PGSC0003DMG400009956,PGSC0003DMG400024081,PGSC0003DMG400000839,PGSC0003DMG400019991,Novel00852,PGSC0003DMG400001752,PGSC0003DMG400006270,PGSC0003DM…
GO:0005509	calcium ion binding	molecular_function	0.008962	0.24755	62	2644	494	29181	Novel01446,PGSC0003DMG400012602,PGSC0003DMG400022318,PGSC0003DMG400027527,PGSC0003DMG400029348,PGSC0003DMG400014168,PGSC0003DMG400022405,PGSC0003DMG400024754,Novel03103,PGSC0003DMG400019446,PGSC0003DMG400013231,PGSC0003DMG400011044,PGSC0003DMG400023440,PGSC0003DMG400027392,PGSC0003DMG400011792,PGSC0003DMG400004078,Novel02721,PGSC0003DMG400019527,PGSC0003DMG400010704,PGSC0003DMG400032788,PGSC0003D…
GO:0048856	anatomical structure development	biological_process	0.0090411	0.24755	57	2644	440	29181	PGSC0003DMG400017100,PGSC0003DMG401014218,PGSC0003DMG400006088,PGSC0003DMG403020240,PGSC0003DMG400016293,PGSC0003DMG400021163,PGSC0003DMG400001433,PGSC0003DMG400030229,PGSC0003DMG400001565,PGSC0003DMG401023118,PGSC0003DMG400030134,PGSC0003DMG400030405,PGSC0003DMG400001461,PGSC0003DMG400025866,PGSC0003DMG400004470,PGSC0003DMG400020906,PGSC0003DMG400027699,PGSC0003DMG400008956,PGSC0003DMG401020908,…
GO:0019867	outer membrane	cellular_component	0.0091694	0.24755	61	2644	487	29181	PGSC0003DMG400022391,PGSC0003DMG401025764,PGSC0003DMG400010177,PGSC0003DMG400025161,PGSC0003DMG400011036,PGSC0003DMG400006896,PGSC0003DMG400013975,PGSC0003DMG402028101,PGSC0003DMG400006593,Novel02679,PGSC0003DMG400013894,PGSC0003DMG400029938,PGSC0003DMG400008673,PGSC0003DMG400008029,PGSC0003DMG400007597,PGSC0003DMG401023504,PGSC0003DMG400024662,PGSC0003DMG400017309,PGSC0003DMG400025616,PGSC0003DM…
GO:0016787	hydrolase activity	molecular_function	0.0091997	0.24755	666	2644	6450	29181	PGSC0003DMG400002085,PGSC0003DMG400006594,PGSC0003DMG400014134,PGSC0003DMG400007126,PGSC0003DMG400012087,PGSC0003DMG400004318,PGSC0003DMG400006462,PGSC0003DMG400022502,PGSC0003DMG400001549,PGSC0003DMG400017152,PGSC0003DMG400019719,PGSC0003DMG400007947,PGSC0003DMG400025813,PGSC0003DMG400005611,PGSC0003DMG400027590,PGSC0003DMG400007913,PGSC0003DMG400027893,PGSC0003DMG400015477,PGSC0003DMG400021039,…
GO:0005244	voltage-gated ion channel activity	molecular_function	0.0092075	0.24755	17	2644	97	29181	PGSC0003DMG400001780,PGSC0003DMG400023512,PGSC0003DMG402003297,PGSC0003DMG402031322,PGSC0003DMG400031145,PGSC0003DMG400024904,PGSC0003DMG401030861,PGSC0003DMG402018143,PGSC0003DMG401004716,PGSC0003DMG400003993,PGSC0003DMG400002730,PGSC0003DMG400008936,Novel01055,PGSC0003DMG400009177,PGSC0003DMG400030373,PGSC0003DMG400005160,PGSC0003DMG401003297
GO:0022832	voltage-gated channel activity	molecular_function	0.0092075	0.24755	17	2644	97	29181	PGSC0003DMG400001780,PGSC0003DMG402031322,PGSC0003DMG402003297,PGSC0003DMG400023512,PGSC0003DMG400031145,PGSC0003DMG401030861,PGSC0003DMG400024904,PGSC0003DMG402018143,PGSC0003DMG401004716,PGSC0003DMG400003993,PGSC0003DMG400002730,PGSC0003DMG400008936,Novel01055,PGSC0003DMG400005160,PGSC0003DMG401003297,PGSC0003DMG400030373,PGSC0003DMG400009177
GO:0003006	developmental process involved in reproduction	biological_process	0.009428	0.24961	16	2644	93	29181	PGSC0003DMG401023504,PGSC0003DMG400000723,PGSC0003DMG400023833,PGSC0003DMG400030902,PGSC0003DMG400008004,PGSC0003DMG400006160,PGSC0003DMG400030918,PGSC0003DMG400002613,PGSC0003DMG400030474,PGSC0003DMG400030337,PGSC0003DMG400021676,PGSC0003DMG400007199,PGSC0003DMG400025750,PGSC0003DMG400006088,PGSC0003DMG400012966,PGSC0003DMG400021163
GO:0042287	MHC protein binding	molecular_function	0.0094365	0.24961	7	2644	26	29181	PGSC0003DMG400028393,PGSC0003DMG400009529,PGSC0003DMG400013556,PGSC0003DMG400020287,PGSC0003DMG400002852,PGSC0003DMG400042273,PGSC0003DMG400024300
GO:0042289	MHC class II protein binding	molecular_function	0.0094365	0.24961	7	2644	26	29181	PGSC0003DMG400020287,PGSC0003DMG400002852,PGSC0003DMG400042273,PGSC0003DMG400024300,PGSC0003DMG400013556,PGSC0003DMG400009529,PGSC0003DMG400028393
GO:0016053	organic acid biosynthetic process	biological_process	0.0095873	0.2509	70	2644	543	29181	PGSC0003DMG400007122,PGSC0003DMG400011218,PGSC0003DMG400014543,PGSC0003DMG400020334,Novel01813,PGSC0003DMG400008551,PGSC0003DMG400022750,PGSC0003DMG400019677,PGSC0003DMG400026494,PGSC0003DMG400012903,PGSC0003DMG400012522,PGSC0003DMG400024591,PGSC0003DMG400003755,PGSC0003DMG400028127,PGSC0003DMG400032250,PGSC0003DMG400020601,PGSC0003DMG400010819,PGSC0003DMG400024204,PGSC0003DMG400018793,PGSC0003DM…
GO:0046394	carboxylic acid biosynthetic process	biological_process	0.0095873	0.2509	70	2644	543	29181	PGSC0003DMG400010485,Novel01240,PGSC0003DMG400013443,PGSC0003DMG400033650,PGSC0003DMG400024392,PGSC0003DMG402023841,PGSC0003DMG400012997,PGSC0003DMG400022225,PGSC0003DMG400029938,PGSC0003DMG402028101,PGSC0003DMG400014379,PGSC0003DMG400013273,PGSC0003DMG400025587,PGSC0003DMG400014622,PGSC0003DMG400026127,PGSC0003DMG400004572,PGSC0003DMG400028102,PGSC0003DMG400021507,PGSC0003DMG400004800,PGSC0003DM…
GO:0005523	tropomyosin binding	molecular_function	0.0097447	0.25209	3	2644	5	29181	PGSC0003DMG400009883,Novel01446,PGSC0003DMG400022318
GO:0051694	pointed-end actin filament capping	biological_process	0.0097447	0.25209	3	2644	5	29181	PGSC0003DMG400009883,PGSC0003DMG400022318,Novel01446
GO:0016628	oxidoreductase activity, acting on the CH-CH group of donors, NAD or NADP as acceptor	molecular_function	0.0097863	0.25209	23	2644	141	29181	PGSC0003DMG402028101,PGSC0003DMG401021138,PGSC0003DMG400000404,PGSC0003DMG402001978,PGSC0003DMG400022405,PGSC0003DMG400018665,Novel03103,PGSC0003DMG400029938,Novel02719,PGSC0003DMG400023424,PGSC0003DMG400003755,PGSC0003DMG400027735,Novel03619,PGSC0003DMG400004800,Novel01240,PGSC0003DMG400023957,PGSC0003DMG400032250,PGSC0003DMG400015379,PGSC0003DMG400004572,PGSC0003DMG400030683,PGSC0003DMG40001567…
GO:0005249	voltage-gated potassium channel activity	molecular_function	0.010123	0.25822	9	2644	40	29181	PGSC0003DMG401030861,PGSC0003DMG400001780,Novel01055,PGSC0003DMG400023512,PGSC0003DMG400003993,PGSC0003DMG400008936,PGSC0003DMG400030373,PGSC0003DMG402018143,PGSC0003DMG401004716
GO:0005746	mitochondrial respiratory chain	cellular_component	0.010132	0.25822	18	2644	106	29181	PGSC0003DMG400031832,PGSC0003DMG400012640,PGSC0003DMG400030941,PGSC0003DMG400029087,PGSC0003DMG400026342,PGSC0003DMG400021686,PGSC0003DMG400008961,PGSC0003DMG400029794,PGSC0003DMG400018535,PGSC0003DMG401011681,PGSC0003DMG400012434,PGSC0003DMG400015276,PGSC0003DMG400016918,PGSC0003DMG400025747,PGSC0003DMG400026323,PGSC0003DMG400028214,PGSC0003DMG400025035,PGSC0003DMG400020819
GO:0015002	heme-copper terminal oxidase activity	molecular_function	0.010182	0.25822	22	2644	139	29181	PGSC0003DMG400009277,PGSC0003DMG400002678,PGSC0003DMG400025747,PGSC0003DMG400022318,PGSC0003DMG400017226,PGSC0003DMG400010430,PGSC0003DMG402030815,PGSC0003DMG400010174,PGSC0003DMG400026069,PGSC0003DMG400012434,PGSC0003DMG400010231,PGSC0003DMG400013886,PGSC0003DMG400011168,PGSC0003DMG400008211,PGSC0003DMG400008961,PGSC0003DMG400006871,PGSC0003DMG400029794,PGSC0003DMG400029788,PGSC0003DMG400031832,…
GO:0008746	NAD(P)+ transhydrogenase activity	molecular_function	0.010683	0.25968	3	2644	5	29181	PGSC0003DMG400030882,PGSC0003DMG400006270,PGSC0003DMG400004899
GO:0008750	NAD(P)+ transhydrogenase (AB-specific) activity	molecular_function	0.010683	0.25968	3	2644	5	29181	PGSC0003DMG400004899,PGSC0003DMG400006270,PGSC0003DMG400030882
GO:0016652	oxidoreductase activity, acting on NAD(P)H, NAD(P) as acceptor	molecular_function	0.010683	0.25968	3	2644	5	29181	PGSC0003DMG400006270,PGSC0003DMG400004899,PGSC0003DMG400030882
GO:0006468	protein phosphorylation	biological_process	0.010718	0.25968	190	2644	1572	29181	PGSC0003DMG400010411,PGSC0003DMG401000057,PGSC0003DMG400006830,PGSC0003DMG400026748,PGSC0003DMG400005352,Novel01650,PGSC0003DMG400013886,PGSC0003DMG400017167,PGSC0003DMG400010665,PGSC0003DMG400017943,PGSC0003DMG400013928,PGSC0003DMG401029032,PGSC0003DMG400025771,PGSC0003DMG400024513,PGSC0003DMG400001059,PGSC0003DMG400018024,PGSC0003DMG400029797,PGSC0003DMG400011251,PGSC0003DMG400024998,PGSC0003DM…
GO:0006848	pyruvate transport	biological_process	0.010852	0.25968	5	2644	18	29181	PGSC0003DMG400026982,PGSC0003DMG400024763,PGSC0003DMG400012255,PGSC0003DMG400013268,PGSC0003DMG400008270
GO:0006850	mitochondrial pyruvate transport	biological_process	0.010852	0.25968	5	2644	18	29181	PGSC0003DMG400013268,PGSC0003DMG400008270,PGSC0003DMG400026982,PGSC0003DMG400024763,PGSC0003DMG400012255
GO:0030855	epithelial cell differentiation	biological_process	0.010869	0.25968	8	2644	34	29181	PGSC0003DMG400000723,PGSC0003DMG400030902,PGSC0003DMG400012966,PGSC0003DMG400006088,PGSC0003DMG400006160,PGSC0003DMG400030918,PGSC0003DMG400008004,PGSC0003DMG400030474
GO:0009664	plant-type cell wall organization	biological_process	0.010917	0.25968	10	2644	46	29181	Novel01842,PGSC0003DMG400021603,PGSC0003DMG400000779,PGSC0003DMG400006286,PGSC0003DMG400002075,PGSC0003DMG400026565,PGSC0003DMG400025627,PGSC0003DMG400000776,PGSC0003DMG400000778,PGSC0003DMG400000783
GO:0071669	plant-type cell wall organization or biogenesis	biological_process	0.010917	0.25968	10	2644	46	29181	PGSC0003DMG400000778,PGSC0003DMG400000776,PGSC0003DMG400000783,Novel01842,PGSC0003DMG400021603,PGSC0003DMG400002075,PGSC0003DMG400006286,PGSC0003DMG400026565,PGSC0003DMG400000779,PGSC0003DMG400025627
GO:0004367	glycerol-3-phosphate dehydrogenase [NAD+] activity	molecular_function	0.010924	0.25968	3	2644	5	29181	PGSC0003DMG400006765,PGSC0003DMG400006965,PGSC0003DMG400012712
GO:0070838	divalent metal ion transport	biological_process	0.011007	0.25968	32	2644	210	29181	PGSC0003DMG400030630,PGSC0003DMG401013112,PGSC0003DMG400006663,PGSC0003DMG400001419,PGSC0003DMG400005160,PGSC0003DMG402008889,PGSC0003DMG400013442,PGSC0003DMG400009180,PGSC0003DMG400014512,PGSC0003DMG402023438,PGSC0003DMG400028102,PGSC0003DMG400028422,PGSC0003DMG400010617,PGSC0003DMG400024909,PGSC0003DMG402007810,PGSC0003DMG400030882,PGSC0003DMG400006378,PGSC0003DMG402002542,PGSC0003DMG401029631,…
GO:0006098	pentose-phosphate shunt	biological_process	0.01102	0.25968	4	2644	10	29181	PGSC0003DMG400001932,PGSC0003DMG400025121,PGSC0003DMG400030509,PGSC0003DMG400005961
GO:0006032	chitin catabolic process	biological_process	0.011031	0.25968	7	2644	27	29181	PGSC0003DMG400025063,PGSC0003DMG400026854,PGSC0003DMG400008673,PGSC0003DMG400026853,PGSC0003DMG400001528,PGSC0003DMG400017753,PGSC0003DMG400026855
GO:0046348	amino sugar catabolic process	biological_process	0.011031	0.25968	7	2644	27	29181	PGSC0003DMG400026855,PGSC0003DMG400017753,PGSC0003DMG400008673,PGSC0003DMG400026854,PGSC0003DMG400025063,PGSC0003DMG400001528,PGSC0003DMG400026853
GO:1901072	glucosamine-containing compound catabolic process	biological_process	0.011031	0.25968	7	2644	27	29181	PGSC0003DMG400026853,PGSC0003DMG400001528,PGSC0003DMG400026854,PGSC0003DMG400025063,PGSC0003DMG400008673,PGSC0003DMG400026855,PGSC0003DMG400017753
GO:0005740	mitochondrial envelope	cellular_component	0.011591	0.27156	81	2644	686	29181	PGSC0003DMG400030439,PGSC0003DMG400004449,PGSC0003DMG400030058,PGSC0003DMG401017657,PGSC0003DMG400000864,PGSC0003DMG400029803,PGSC0003DMG400029967,PGSC0003DMG400030630,PGSC0003DMG400029788,PGSC0003DMG400029794,PGSC0003DMG400031755,PGSC0003DMG400008961,PGSC0003DMG400022358,PGSC0003DMG400008270,PGSC0003DMG400011133,Novel03146,PGSC0003DMG400002066,PGSC0003DMG400020819,PGSC0003DMG400002690,PGSC0003DM…
GO:0043226	organelle	cellular_component	0.012229	0.28514	689	2644	6962	29181	PGSC0003DMG400002545,PGSC0003DMG400029915,PGSC0003DMG400030551,PGSC0003DMG400033063,PGSC0003DMG400026073,Novel01266,PGSC0003DMG400023039,PGSC0003DMG400006312,PGSC0003DMG401009709,PGSC0003DMG400004685,PGSC0003DMG400014714,PGSC0003DMG400018670,PGSC0003DMG400009063,PGSC0003DMG400026339,PGSC0003DMG400024208,PGSC0003DMG400022391,PGSC0003DMG400026784,PGSC0003DMG400012124,PGSC0003DMG400013213,PGSC0003DM…
GO:0048468	cell development	biological_process	0.012319	0.28532	20	2644	121	29181	PGSC0003DMG400030337,PGSC0003DMG400002613,PGSC0003DMG402030499,PGSC0003DMG400003756,PGSC0003DMG400030474,PGSC0003DMG400030918,PGSC0003DMG400006160,PGSC0003DMG400021563,PGSC0003DMG400008004,PGSC0003DMG400030902,PGSC0003DMG400011541,PGSC0003DMG400027523,PGSC0003DMG400000723,PGSC0003DMG400022225,PGSC0003DMG400021163,PGSC0003DMG400025750,PGSC0003DMG400006088,PGSC0003DMG400012966,PGSC0003DMG400016293,…
GO:0019030	icosahedral viral capsid	cellular_component	0.012373	0.28532	4	2644	10	29181	PGSC0003DMG400025587,PGSC0003DMG400013485,PGSC0003DMG403018293,PGSC0003DMG400003574
GO:1901575	organic substance catabolic process	biological_process	0.01241	0.28532	124	2644	1076	29181	PGSC0003DMG400005494,PGSC0003DMG400025471,PGSC0003DMG400011038,PGSC0003DMG400025668,PGSC0003DMG400020286,PGSC0003DMG402019187,PGSC0003DMG400026854,PGSC0003DMG400025384,PGSC0003DMG400027283,PGSC0003DMG400001528,PGSC0003DMG400030683,PGSC0003DMG400004629,PGSC0003DMG400012910,PGSC0003DMG400026523,PGSC0003DMG400005339,PGSC0003DMG400002613,PGSC0003DMG400008308,PGSC0003DMG402023438,PGSC0003DMG400014560,…
GO:0030170	pyridoxal phosphate binding	molecular_function	0.013288	0.30408	27	2644	171	29181	Novel00136,PGSC0003DMG400029938,PGSC0003DMG400026280,PGSC0003DMG400027919,PGSC0003DMG400020720,PGSC0003DMG400012186,PGSC0003DMG400000193,PGSC0003DMG400027014,PGSC0003DMG400021582,PGSC0003DMG400015745,PGSC0003DMG400018110,PGSC0003DMG400004899,PGSC0003DMG400004643,Novel02031,PGSC0003DMG400022742,PGSC0003DMG400025134,Novel02023,PGSC0003DMG400022764,PGSC0003DMG400029591,PGSC0003DMG400021866,PGSC0003D…
GO:0006865	amino acid transport	biological_process	0.013487	0.3072	17	2644	95	29181	PGSC0003DMG400011538,PGSC0003DMG400008360,PGSC0003DMG400032227,PGSC0003DMG400020266,PGSC0003DMG400002539,PGSC0003DMG400025523,PGSC0003DMG400007784,PGSC0003DMG400011771,PGSC0003DMG400032226,PGSC0003DMG400030568,PGSC0003DMG400021102,PGSC0003DMG400024998,PGSC0003DMG400007597,PGSC0003DMG400006021,PGSC0003DMG400001410,PGSC0003DMG400013886,PGSC0003DMG400014203
GO:0008037	cell recognition	biological_process	0.014032	0.31432	18	2644	94	29181	PGSC0003DMG400026155,PGSC0003DMG400013885,Novel01985,PGSC0003DMG400024260,PGSC0003DMG400017330,Novel00663,Novel01501,PGSC0003DMG400024998,PGSC0003DMG400011251,PGSC0003DMG400004930,PGSC0003DMG400017331,PGSC0003DMG400001059,Novel00172,PGSC0003DMG400013886,PGSC0003DMG400026154,PGSC0003DMG401028902,PGSC0003DMG400003313,PGSC0003DMG400022391
GO:0004129	cytochrome-c oxidase activity	molecular_function	0.014055	0.31432	20	2644	128	29181	PGSC0003DMG400029794,PGSC0003DMG400029788,PGSC0003DMG400008211,PGSC0003DMG400008961,PGSC0003DMG400006871,PGSC0003DMG400011391,PGSC0003DMG400012640,PGSC0003DMG400031832,PGSC0003DMG400000723,PGSC0003DMG400010430,PGSC0003DMG402030815,PGSC0003DMG400010174,PGSC0003DMG400009277,PGSC0003DMG400025747,PGSC0003DMG400022318,PGSC0003DMG400017226,PGSC0003DMG400013886,PGSC0003DMG400011168,PGSC0003DMG400026069,…
GO:0016675	oxidoreductase activity, acting on a heme group of donors	molecular_function	0.014055	0.31432	20	2644	128	29181	PGSC0003DMG400017226,PGSC0003DMG400009277,PGSC0003DMG400025747,PGSC0003DMG400022318,PGSC0003DMG400010174,PGSC0003DMG400010430,PGSC0003DMG402030815,PGSC0003DMG400012434,PGSC0003DMG400026069,PGSC0003DMG400011168,PGSC0003DMG400013886,PGSC0003DMG400008211,PGSC0003DMG400008961,PGSC0003DMG400006871,PGSC0003DMG400029788,PGSC0003DMG400029794,PGSC0003DMG400000723,PGSC0003DMG400031832,PGSC0003DMG400012640,…
GO:0016676	oxidoreductase activity, acting on a heme group of donors, oxygen as acceptor	molecular_function	0.014055	0.31432	20	2644	128	29181	PGSC0003DMG400031832,PGSC0003DMG400000723,PGSC0003DMG400011391,PGSC0003DMG400012640,PGSC0003DMG400006871,PGSC0003DMG400008211,PGSC0003DMG400008961,PGSC0003DMG400029794,PGSC0003DMG400029788,PGSC0003DMG400026069,PGSC0003DMG400012434,PGSC0003DMG400013886,PGSC0003DMG400011168,PGSC0003DMG400025747,PGSC0003DMG400022318,PGSC0003DMG400009277,PGSC0003DMG400017226,PGSC0003DMG402030815,PGSC0003DMG400010430,…
GO:0008171	O-methyltransferase activity	molecular_function	0.01455	0.32392	22	2644	144	29181	PGSC0003DMG400000850,PGSC0003DMG400017020,PGSC0003DMG400002387,PGSC0003DMG400005749,PGSC0003DMG400006214,PGSC0003DMG400025882,Novel01690,PGSC0003DMG402028784,PGSC0003DMG400012593,PGSC0003DMG400000851,PGSC0003DMG400000839,Novel01691,PGSC0003DMG400030131,PGSC0003DMG400011266,PGSC0003DMG400008591,PGSC0003DMG400020160,Novel01689,PGSC0003DMG401004586,PGSC0003DMG400029476,PGSC0003DMG400000289,PGSC0003D…
GO:0004185	serine-type carboxypeptidase activity	molecular_function	0.014619	0.32396	14	2644	77	29181	PGSC0003DMG402010623,PGSC0003DMG400003241,PGSC0003DMG400021866,PGSC0003DMG400007137,Novel02259,PGSC0003DMG400001455,PGSC0003DMG400005668,Novel00298,PGSC0003DMG400028787,PGSC0003DMG400014250,PGSC0003DMG400012133,PGSC0003DMG400022103,PGSC0003DMG400024802,PGSC0003DMG400027263
GO:0019682	glyceraldehyde-3-phosphate metabolic process	biological_process	0.014684	0.32396	5	2644	17	29181	PGSC0003DMG400002201,PGSC0003DMG400025121,PGSC0003DMG400001932,PGSC0003DMG400005961,PGSC0003DMG400030509
GO:0046700	heterocycle catabolic process	biological_process	0.015534	0.34019	34	2644	243	29181	PGSC0003DMG400022493,PGSC0003DMG400006709,PGSC0003DMG400013879,PGSC0003DMG400025814,PGSC0003DMG400000376,Novel00283,PGSC0003DMG402023438,PGSC0003DMG400014560,PGSC0003DMG401028570,PGSC0003DMG400031845,PGSC0003DMG400033029,PGSC0003DMG400004629,PGSC0003DMG400008308,PGSC0003DMG400011038,PGSC0003DMG400025471,PGSC0003DMG400023115,PGSC0003DMG400027283,PGSC0003DMG400007126,PGSC0003DMG400001976,PGSC0003DM…
GO:0008238	exopeptidase activity	molecular_function	0.015557	0.34019	34	2644	245	29181	PGSC0003DMG401026984,PGSC0003DMG400011436,PGSC0003DMG400023362,PGSC0003DMG400012133,PGSC0003DMG400024802,PGSC0003DMG400022103,Novel00298,PGSC0003DMG400005668,PGSC0003DMG400017516,PGSC0003DMG400020866,PGSC0003DMG400012997,PGSC0003DMG400003241,PGSC0003DMG402010623,PGSC0003DMG400026516,PGSC0003DMG400027012,PGSC0003DMG400022749,PGSC0003DMG400019130,PGSC0003DMG400001455,PGSC0003DMG400030082,PGSC0003DM…
GO:0007224	smoothened signaling pathway	biological_process	0.01577	0.34332	8	2644	35	29181	PGSC0003DMG400015391,PGSC0003DMG400007614,PGSC0003DMG400001854,PGSC0003DMG400018361,PGSC0003DMG400023483,PGSC0003DMG400014324,PGSC0003DMG400030134,PGSC0003DMG400002678
GO:0070008	serine-type exopeptidase activity	molecular_function	0.015878	0.34415	20	2644	125	29181	PGSC0003DMG400011436,PGSC0003DMG400023362,PGSC0003DMG400021866,PGSC0003DMG400007137,PGSC0003DMG400005668,Novel00298,PGSC0003DMG400012133,PGSC0003DMG400022103,PGSC0003DMG400024802,PGSC0003DMG400015489,PGSC0003DMG400001525,PGSC0003DMG402010623,PGSC0003DMG400003241,PGSC0003DMG400001455,PGSC0003DMG400014250,PGSC0003DMG400028787,Novel02259,PGSC0003DMG400027263,PGSC0003DMG400022749,PGSC0003DMG400006157
GO:0044238	primary metabolic process	biological_process	0.016119	0.34784	1365	2644	13934	29181	PGSC0003DMG400000174,PGSC0003DMG400035092,PGSC0003DMG400030121,PGSC0003DMG400005092,PGSC0003DMG400007122,PGSC0003DMG400013438,PGSC0003DMG402012324,PGSC0003DMG400022361,PGSC0003DMG400017678,PGSC0003DMG400006815,PGSC0003DMG401012439,PGSC0003DMG400019511,PGSC0003DMG400010819,PGSC0003DMG400014157,PGSC0003DMG400020287,PGSC0003DMG401014396,PGSC0003DMG400008829,PGSC0003DMG400031778,PGSC0003DMG400007899,…
GO:0022804	active transmembrane transporter activity	molecular_function	0.016424	0.34882	70	2644	566	29181	PGSC0003DMG400003889,PGSC0003DMG400006378,PGSC0003DMG401029631,PGSC0003DMG400024142,PGSC0003DMG402023631,PGSC0003DMG400001410,PGSC0003DMG402003112,PGSC0003DMG400009529,PGSC0003DMG400013196,PGSC0003DMG400016433,PGSC0003DMG400002613,PGSC0003DMG400029931,Novel01970,Novel02018,PGSC0003DMG400004474,PGSC0003DMG400030630,PGSC0003DMG400006506,PGSC0003DMG402018143,PGSC0003DMG400012659,PGSC0003DMG400012616…
GO:0070469	respiratory chain	cellular_component	0.016599	0.34882	19	2644	121	29181	PGSC0003DMG400020819,PGSC0003DMG400020649,PGSC0003DMG400025035,PGSC0003DMG400026323,PGSC0003DMG400028214,PGSC0003DMG400025747,PGSC0003DMG400016918,PGSC0003DMG400015276,PGSC0003DMG400018535,PGSC0003DMG400012434,PGSC0003DMG401011681,PGSC0003DMG400029794,PGSC0003DMG400026342,PGSC0003DMG400008961,PGSC0003DMG400021686,PGSC0003DMG400030941,PGSC0003DMG400029087,PGSC0003DMG400012640,PGSC0003DMG400031832
GO:0006558	L-phenylalanine metabolic process	biological_process	0.016645	0.34882	5	2644	17	29181	PGSC0003DMG400026536,PGSC0003DMG400014543,PGSC0003DMG400013273,PGSC0003DMG400007122,PGSC0003DMG400016478
GO:1902221	erythrose 4-phosphate/phosphoenolpyruvate family amino acid metabolic process	biological_process	0.016645	0.34882	5	2644	17	29181	PGSC0003DMG400016478,PGSC0003DMG400007122,PGSC0003DMG400026536,PGSC0003DMG400014543,PGSC0003DMG400013273
GO:0043385	mycotoxin metabolic process	biological_process	0.016874	0.34882	3	2644	7	29181	PGSC0003DMG400029591,PGSC0003DMG401029032,PGSC0003DMG401011372
GO:0043386	mycotoxin biosynthetic process	biological_process	0.016874	0.34882	3	2644	7	29181	PGSC0003DMG401029032,PGSC0003DMG400029591,PGSC0003DMG401011372
GO:0045122	aflatoxin biosynthetic process	biological_process	0.016874	0.34882	3	2644	7	29181	PGSC0003DMG401011372,PGSC0003DMG400029591,PGSC0003DMG401029032
GO:0046222	aflatoxin metabolic process	biological_process	0.016874	0.34882	3	2644	7	29181	PGSC0003DMG401011372,PGSC0003DMG401029032,PGSC0003DMG400029591
GO:1901376	organic heteropentacyclic compound metabolic process	biological_process	0.016874	0.34882	3	2644	7	29181	PGSC0003DMG401029032,PGSC0003DMG400029591,PGSC0003DMG401011372
GO:1901378	organic heteropentacyclic compound biosynthetic process	biological_process	0.016874	0.34882	3	2644	7	29181	PGSC0003DMG401011372,PGSC0003DMG401029032,PGSC0003DMG400029591
GO:0031683	G-protein beta/gamma-subunit complex binding	molecular_function	0.017303	0.35619	16	2644	92	29181	PGSC0003DMG400013514,PGSC0003DMG400003089,Novel00629,PGSC0003DMG402002542,PGSC0003DMG400003889,PGSC0003DMG400027520,PGSC0003DMG400025931,PGSC0003DMG400019677,PGSC0003DMG400007288,PGSC0003DMG400007295,PGSC0003DMG400012995,PGSC0003DMG400010314,PGSC0003DMG400021456,PGSC0003DMG400001419,PGSC0003DMG400028925,PGSC0003DMG400013442
GO:0051015	actin filament binding	molecular_function	0.017571	0.3602	8	2644	36	29181	PGSC0003DMG400007713,PGSC0003DMG400030006,PGSC0003DMG400001077,PGSC0003DMG400029298,PGSC0003DMG400014055,PGSC0003DMG400008553,PGSC0003DMG400001307,PGSC0003DMG400022500
GO:0032797	SMN complex	cellular_component	0.01778	0.36297	4	2644	11	29181	PGSC0003DMG400006589,PGSC0003DMG400031793,PGSC0003DMG400005092,PGSC0003DMG400004853
GO:0008080	N-acetyltransferase activity	molecular_function	0.018152	0.36903	23	2644	156	29181	PGSC0003DMG400014778,PGSC0003DMG400008977,PGSC0003DMG400014774,PGSC0003DMG400014772,PGSC0003DMG400015229,PGSC0003DMG400031145,PGSC0003DMG400008852,PGSC0003DMG400012848,PGSC0003DMG400026301,PGSC0003DMG400019822,PGSC0003DMG400006777,PGSC0003DMG400026128,PGSC0003DMG400004975,PGSC0003DMG400000729,PGSC0003DMG400014776,PGSC0003DMG400008956,PGSC0003DMG400032272,PGSC0003DMG400014771,PGSC0003DMG400016395,…
GO:0006091	generation of precursor metabolites and energy	biological_process	0.018352	0.37041	74	2644	607	29181	Novel00852,PGSC0003DMG400000766,PGSC0003DMG400001752,PGSC0003DMG400006270,PGSC0003DMG400015276,PGSC0003DMG400011044,PGSC0003DMG400021264,PGSC0003DMG400010084,PGSC0003DMG400007488,PGSC0003DMG400007552,PGSC0003DMG400028214,PGSC0003DMG400009956,PGSC0003DMG400002497,PGSC0003DMG402013561,PGSC0003DMG400014183,PGSC0003DMG400030941,PGSC0003DMG400028177,PGSC0003DMG400025171,PGSC0003DMG400018635,PGSC0003DM…
GO:0098803	respiratory chain complex	cellular_component	0.01837	0.37041	15	2644	89	29181	PGSC0003DMG400015276,PGSC0003DMG400016918,PGSC0003DMG400018535,PGSC0003DMG401011681,PGSC0003DMG400020819,PGSC0003DMG400025035,PGSC0003DMG400029794,PGSC0003DMG400026342,PGSC0003DMG400026323,PGSC0003DMG400021686,PGSC0003DMG400008961,PGSC0003DMG400028214,PGSC0003DMG400030941,PGSC0003DMG400025747,PGSC0003DMG400029087
GO:0042180	cellular ketone metabolic process	biological_process	0.01849	0.37131	11	2644	56	29181	PGSC0003DMG400025792,PGSC0003DMG400007614,PGSC0003DMG400023115,PGSC0003DMG400030814,PGSC0003DMG400000723,PGSC0003DMG400007613,PGSC0003DMG400004922,PGSC0003DMG402003112,PGSC0003DMG400006871,PGSC0003DMG400029794,PGSC0003DMG400014134
GO:0009403	toxin biosynthetic process	biological_process	0.0186	0.37194	7	2644	31	29181	PGSC0003DMG402023841,PGSC0003DMG401011372,PGSC0003DMG400009925,PGSC0003DMG400025616,PGSC0003DMG401029032,PGSC0003DMG400029591,PGSC0003DMG400014295
GO:0010563	negative regulation of phosphorus metabolic process	biological_process	0.018856	0.37194	4	2644	11	29181	PGSC0003DMG400022507,PGSC0003DMG400018119,PGSC0003DMG400007819,PGSC0003DMG400027771
GO:0045936	negative regulation of phosphate metabolic process	biological_process	0.018856	0.37194	4	2644	11	29181	PGSC0003DMG400018119,PGSC0003DMG400022507,PGSC0003DMG400007819,PGSC0003DMG400027771
GO:0044262	cellular carbohydrate metabolic process	biological_process	0.018883	0.37194	47	2644	358	29181	PGSC0003DMG400014024,PGSC0003DMG402014514,PGSC0003DMG400013443,PGSC0003DMG400031262,PGSC0003DMG400020321,PGSC0003DMG400029348,PGSC0003DMG400013975,PGSC0003DMG400029938,PGSC0003DMG400001976,PGSC0003DMG400002396,PGSC0003DMG402005942,PGSC0003DMG400010794,PGSC0003DMG400017298,PGSC0003DMG400003067,PGSC0003DMG400017516,PGSC0003DMG400012634,PGSC0003DMG400008447,PGSC0003DMG400009477,PGSC0003DMG400027050,…
GO:0044270	cellular nitrogen compound catabolic process	biological_process	0.018928	0.37194	34	2644	246	29181	PGSC0003DMG400021128,Novel03093,PGSC0003DMG400031809,PGSC0003DMG400030840,PGSC0003DMG400015933,PGSC0003DMG400019347,PGSC0003DMG400024765,PGSC0003DMG400007233,PGSC0003DMG400007126,PGSC0003DMG400001976,PGSC0003DMG400028124,PGSC0003DMG400001752,PGSC0003DMG400000613,PGSC0003DMG400018331,PGSC0003DMG400028904,PGSC0003DMG400010231,PGSC0003DMG400025813,PGSC0003DMG400004629,PGSC0003DMG400008308,PGSC0003DM…
GO:0006733	oxidoreduction coenzyme metabolic process	biological_process	0.018975	0.37194	20	2644	124	29181	PGSC0003DMG402023631,PGSC0003DMG402003112,PGSC0003DMG400030509,PGSC0003DMG400005961,PGSC0003DMG400002690,Novel00931,PGSC0003DMG400010485,PGSC0003DMG400011044,PGSC0003DMG400019247,PGSC0003DMG400028177,PGSC0003DMG400012910,PGSC0003DMG400006871,PGSC0003DMG400029794,PGSC0003DMG400025171,PGSC0003DMG400001932,PGSC0003DMG400007614,PGSC0003DMG400005494,PGSC0003DMG400007613,PGSC0003DMG400025121,PGSC0003DM…
GO:0044550	secondary metabolite biosynthetic process	biological_process	0.019345	0.37768	10	2644	51	29181	PGSC0003DMG400029803,PGSC0003DMG402023841,PGSC0003DMG400025616,PGSC0003DMG400014295,PGSC0003DMG401011372,PGSC0003DMG400029730,PGSC0003DMG400015607,PGSC0003DMG400009925,PGSC0003DMG400029591,PGSC0003DMG401029032
GO:0044429	mitochondrial part	cellular_component	0.019811	0.38526	86	2644	750	29181	PGSC0003DMG400000301,PGSC0003DMG400010794,PGSC0003DMG400015263,PGSC0003DMG400008751,PGSC0003DMG400033637,PGSC0003DMG400015405,PGSC0003DMG400024615,PGSC0003DMG401025764,PGSC0003DMG400000421,PGSC0003DMG400016918,PGSC0003DMG400025038,PGSC0003DMG400025161,PGSC0003DMG400021701,PGSC0003DMG400007597,PGSC0003DMG400026982,PGSC0003DMG400013894,PGSC0003DMG400020649,PGSC0003DMG400031832,PGSC0003DMG400028842,…
GO:0005402	cation:sugar symporter activity	molecular_function	0.020072	0.38534	7	2644	31	29181	PGSC0003DMG400021023,PGSC0003DMG400021614,PGSC0003DMG400009074,PGSC0003DMG400016649,Novel00909,PGSC0003DMG400011249,PGSC0003DMG400002133
GO:0044422	organelle part	cellular_component	0.020215	0.38534	367	2644	3586	29181	PGSC0003DMG400028787,PGSC0003DMG402018777,Novel01580,PGSC0003DMG400003755,PGSC0003DMG400033921,PGSC0003DMG400028145,PGSC0003DMG400007199,PGSC0003DMG400007316,PGSC0003DMG403006826,PGSC0003DMG400025747,PGSC0003DMG400024511,PGSC0003DMG400023518,PGSC0003DMG400006622,PGSC0003DMG402017902,PGSC0003DMG401004716,PGSC0003DMG400009823,PGSC0003DMG400016441,PGSC0003DMG400000248,PGSC0003DMG400001719,PGSC0003DM…
GO:0072511	divalent inorganic cation transport	biological_process	0.020233	0.38534	36	2644	254	29181	PGSC0003DMG400010794,PGSC0003DMG400017824,PGSC0003DMG400012984,PGSC0003DMG400009401,PGSC0003DMG401024899,PGSC0003DMG400032233,PGSC0003DMG400013474,PGSC0003DMG400031145,PGSC0003DMG400002134,PGSC0003DMG400014173,PGSC0003DMG402003705,PGSC0003DMG400004439,PGSC0003DMG400022639,PGSC0003DMG400026304,Novel01511,PGSC0003DMG400012516,PGSC0003DMG400030630,PGSC0003DMG400014843,PGSC0003DMG401013112,PGSC0003DM…
GO:0022884	macromolecule transmembrane transporter activity	molecular_function	0.020261	0.38534	9	2644	46	29181	PGSC0003DMG402000722,PGSC0003DMG400027384,PGSC0003DMG400033685,PGSC0003DMG400005540,PGSC0003DMG401014249,PGSC0003DMG400012760,PGSC0003DMG400001459,PGSC0003DMG400021068,PGSC0003DMG400047233
GO:0016829	lyase activity	molecular_function	0.020287	0.38534	107	2644	922	29181	PGSC0003DMG400012185,PGSC0003DMG401031070,PGSC0003DMG400001444,PGSC0003DMG400027014,PGSC0003DMG400003531,PGSC0003DMG400005284,PGSC0003DMG400007070,PGSC0003DMG400010444,PGSC0003DMG400025336,PGSC0003DMG400000376,PGSC0003DMG402003112,PGSC0003DMG400028406,PGSC0003DMG400030134,Novel00136,PGSC0003DMG400004153,PGSC0003DMG400001206,PGSC0003DMG400001287,PGSC0003DMG400026300,PGSC0003DMG400016285,PGSC0003DM…
GO:0043227	membrane-bounded organelle	cellular_component	0.020318	0.38534	553	2644	5502	29181	PGSC0003DMG401011681,PGSC0003DMG400002624,PGSC0003DMG401017590,PGSC0003DMG401022411,PGSC0003DMG400027168,PGSC0003DMG400013345,PGSC0003DMG400027736,PGSC0003DMG401025150,PGSC0003DMG400001656,PGSC0003DMG400006447,PGSC0003DMG400018823,PGSC0003DMG400004853,PGSC0003DMG400009955,PGSC0003DMG400016649,PGSC0003DMG400006169,PGSC0003DMG400025038,PGSC0003DMG400004439,PGSC0003DMG400014791,PGSC0003DMG400027269,…
GO:0005507	copper ion binding	molecular_function	0.020435	0.38534	30	2644	212	29181	PGSC0003DMG402028101,PGSC0003DMG400029730,PGSC0003DMG400000761,PGSC0003DMG400027168,PGSC0003DMG400009472,PGSC0003DMG402023951,PGSC0003DMG400025038,PGSC0003DMG400033650,PGSC0003DMG400029325,PGSC0003DMG400000608,PGSC0003DMG400030082,PGSC0003DMG400027766,PGSC0003DMG400012418,PGSC0003DMG400010704,PGSC0003DMG400009887,PGSC0003DMG400029931,PGSC0003DMG400003988,PGSC0003DMG400013855,PGSC0003DMG400030551,…
GO:0004298	threonine-type endopeptidase activity	molecular_function	0.020572	0.38534	7	2644	32	29181	PGSC0003DMG400015462,PGSC0003DMG400021163,PGSC0003DMG400020441,PGSC0003DMG402019187,PGSC0003DMG400002904,PGSC0003DMG400009650,PGSC0003DMG400022569
GO:0070003	threonine-type peptidase activity	molecular_function	0.020572	0.38534	7	2644	32	29181	PGSC0003DMG400022569,PGSC0003DMG400009650,PGSC0003DMG400015462,PGSC0003DMG400020441,PGSC0003DMG400021163,PGSC0003DMG402019187,PGSC0003DMG400002904
GO:0006839	mitochondrial transport	biological_process	0.020662	0.38534	15	2644	94	29181	Novel01580,PGSC0003DMG400030630,PGSC0003DMG400016015,PGSC0003DMG400029803,PGSC0003DMG400008270,PGSC0003DMG400033637,PGSC0003DMG400013268,PGSC0003DMG400007597,PGSC0003DMG400012255,PGSC0003DMG400026982,PGSC0003DMG400011731,PGSC0003DMG400024615,Novel03389,PGSC0003DMG400024763,PGSC0003DMG400013894
GO:0031966	mitochondrial membrane	cellular_component	0.020677	0.38534	76	2644	655	29181	PGSC0003DMG400011133,PGSC0003DMG400002066,Novel03146,PGSC0003DMG400020819,PGSC0003DMG400018763,PGSC0003DMG400002690,PGSC0003DMG400015599,PGSC0003DMG400030058,PGSC0003DMG400000864,PGSC0003DMG401017657,PGSC0003DMG400030439,PGSC0003DMG400004449,PGSC0003DMG400029967,PGSC0003DMG400030630,PGSC0003DMG400029803,PGSC0003DMG400029794,PGSC0003DMG400008270,PGSC0003DMG400031755,PGSC0003DMG400008961,PGSC0003DM…
GO:0044446	intracellular organelle part	cellular_component	0.02104	0.38897	361	2644	3525	29181	PGSC0003DMG400023359,PGSC0003DMG401023644,PGSC0003DMG400010999,PGSC0003DMG400015263,PGSC0003DMG400011167,PGSC0003DMG400028310,PGSC0003DMG400011655,PGSC0003DMG400030000,PGSC0003DMG400011365,PGSC0003DMG400000173,PGSC0003DMG400015405,PGSC0003DMG400013434,PGSC0003DMG400003122,Novel01882,PGSC0003DMG400043827,PGSC0003DMG400015015,PGSC0003DMG400014173,PGSC0003DMG400001684,PGSC0003DMG400006621,PGSC0003DM…
GO:0031505	fungal-type cell wall organization	biological_process	0.021242	0.38897	5	2644	18	29181	PGSC0003DMG400011238,PGSC0003DMG402028784,PGSC0003DMG401024899,PGSC0003DMG400028904,PGSC0003DMG402023533
GO:0071852	fungal-type cell wall organization or biogenesis	biological_process	0.021242	0.38897	5	2644	18	29181	PGSC0003DMG402023533,PGSC0003DMG400028904,PGSC0003DMG402028784,PGSC0003DMG401024899,PGSC0003DMG400011238
GO:0042775	mitochondrial ATP synthesis coupled electron transport	biological_process	0.021247	0.38897	12	2644	66	29181	PGSC0003DMG400030941,PGSC0003DMG400010084,PGSC0003DMG400029087,PGSC0003DMG400026342,PGSC0003DMG400018150,PGSC0003DMG400021686,Novel02377,PGSC0003DMG400002497,PGSC0003DMG400018535,PGSC0003DMG400015276,PGSC0003DMG400016918,PGSC0003DMG401033880
GO:0003924	GTPase activity	molecular_function	0.02157	0.38897	71	2644	553	29181	PGSC0003DMG401013112,PGSC0003DMG400020850,Novel01614,PGSC0003DMG400002613,PGSC0003DMG400013442,PGSC0003DMG400034688,PGSC0003DMG400010314,PGSC0003DMG400026456,PGSC0003DMG400024909,PGSC0003DMG400014248,PGSC0003DMG400001326,PGSC0003DMG400024273,PGSC0003DMG401029631,PGSC0003DMG400003889,PGSC0003DMG402007810,PGSC0003DMG400017317,Novel01266,PGSC0003DMG400007288,PGSC0003DMG400002612,PGSC0003DMG400017309…
GO:0015171	amino acid transmembrane transporter activity	molecular_function	0.021654	0.38897	12	2644	64	29181	PGSC0003DMG400001410,PGSC0003DMG400007597,PGSC0003DMG400024998,PGSC0003DMG400021102,PGSC0003DMG400030568,PGSC0003DMG400032226,PGSC0003DMG400007784,PGSC0003DMG400012516,PGSC0003DMG400025523,PGSC0003DMG400002539,PGSC0003DMG400013886,PGSC0003DMG400032227
GO:0016973	poly(A)+ mRNA export from nucleus	biological_process	0.021814	0.38897	4	2644	11	29181	PGSC0003DMG400030405,PGSC0003DMG400012613,PGSC0003DMG400010444,PGSC0003DMG400003122
GO:1903825	organic acid transmembrane transport	biological_process	0.021984	0.38897	15	2644	83	29181	PGSC0003DMG400014203,PGSC0003DMG400007784,PGSC0003DMG400032227,PGSC0003DMG400013886,PGSC0003DMG400020266,PGSC0003DMG400008360,PGSC0003DMG400006021,PGSC0003DMG400011538,PGSC0003DMG400024998,PGSC0003DMG400007597,PGSC0003DMG400013282,PGSC0003DMG400032226,PGSC0003DMG400011771,PGSC0003DMG400030568,PGSC0003DMG400021102
GO:0000977	RNA polymerase II regulatory region sequence-specific DNA binding	molecular_function	0.022022	0.38897	2	2644	3	29181	PGSC0003DMG400004746,PGSC0003DMG400031267
GO:0000978	RNA polymerase II core promoter proximal region sequence-specific DNA binding	molecular_function	0.022022	0.38897	2	2644	3	29181	PGSC0003DMG400031267,PGSC0003DMG400004746
GO:0000982	transcription factor activity, RNA polymerase II core promoter proximal region sequence-specific binding	molecular_function	0.022022	0.38897	2	2644	3	29181	PGSC0003DMG400031267,PGSC0003DMG400004746
GO:0000987	core promoter proximal region sequence-specific DNA binding	molecular_function	0.022022	0.38897	2	2644	3	29181	PGSC0003DMG400031267,PGSC0003DMG400004746
GO:0001012	RNA polymerase II regulatory region DNA binding	molecular_function	0.022022	0.38897	2	2644	3	29181	PGSC0003DMG400004746,PGSC0003DMG400031267
GO:0001159	core promoter proximal region DNA binding	molecular_function	0.022022	0.38897	2	2644	3	29181	PGSC0003DMG400031267,PGSC0003DMG400004746
GO:1901361	organic cyclic compound catabolic process	biological_process	0.022057	0.38897	35	2644	257	29181	PGSC0003DMG401028570,PGSC0003DMG400031845,PGSC0003DMG400033029,Novel00283,PGSC0003DMG400014560,PGSC0003DMG402023438,PGSC0003DMG400025814,PGSC0003DMG400000376,PGSC0003DMG400022493,PGSC0003DMG400006709,PGSC0003DMG400013879,PGSC0003DMG400027283,PGSC0003DMG400011038,PGSC0003DMG400025471,PGSC0003DMG400023115,PGSC0003DMG400008308,PGSC0003DMG400004629,PGSC0003DMG400028904,PGSC0003DMG400010231,PGSC0003DM…
GO:0005839	proteasome core complex	cellular_component	0.022314	0.39095	11	2644	62	29181	PGSC0003DMG401021929,PGSC0003DMG400015462,PGSC0003DMG400002904,PGSC0003DMG400020441,PGSC0003DMG400022569,PGSC0003DMG400009650,PGSC0003DMG400000330,PGSC0003DMG400022748,PGSC0003DMG400021163,PGSC0003DMG402019187,PGSC0003DMG400022391
GO:0003779	actin binding	molecular_function	0.022357	0.39095	37	2644	273	29181	PGSC0003DMG400010859,PGSC0003DMG400008553,PGSC0003DMG400010466,PGSC0003DMG400000376,PGSC0003DMG400022500,PGSC0003DMG401003156,PGSC0003DMG400029713,PGSC0003DMG400023424,PGSC0003DMG400003036,PGSC0003DMG400006088,PGSC0003DMG400015213,PGSC0003DMG400025743,PGSC0003DMG400001307,PGSC0003DMG400000912,PGSC0003DMG400018800,PGSC0003DMG400026001,PGSC0003DMG400001399,PGSC0003DMG400007059,PGSC0003DMG400004900,…
GO:0019236	response to pheromone	biological_process	0.022408	0.39095	5	2644	17	29181	PGSC0003DMG400003221,PGSC0003DMG403016434,PGSC0003DMG400011055,PGSC0003DMG400008579,PGSC0003DMG400030229
GO:0006464	cellular protein modification process	biological_process	0.023123	0.40059	291	2644	2599	29181	PGSC0003DMG400029075,PGSC0003DMG400015021,PGSC0003DMG400010032,PGSC0003DMG400013334,PGSC0003DMG400006286,PGSC0003DMG400018184,PGSC0003DMG400008404,Novel01899,PGSC0003DMG400018672,PGSC0003DMG400003429,PGSC0003DMG400030450,PGSC0003DMG400005103,PGSC0003DMG400024596,PGSC0003DMG400014854,PGSC0003DMG401031070,PGSC0003DMG400001326,PGSC0003DMG401004603,Novel01647,Novel03146,PGSC0003DMG400041071,PGSC0003D…
GO:0036211	protein modification process	biological_process	0.023123	0.40059	291	2644	2599	29181	PGSC0003DMG400022026,PGSC0003DMG400003213,PGSC0003DMG400020819,Novel03437,PGSC0003DMG401005729,PGSC0003DMG400028393,PGSC0003DMG400028073,PGSC0003DMG400013545,PGSC0003DMG400012143,PGSC0003DMG401014605,PGSC0003DMG400015213,PGSC0003DMG400026456,PGSC0003DMG400030474,PGSC0003DMG400002613,PGSC0003DMG401005733,PGSC0003DMG400001368,PGSC0003DMG400032825,PGSC0003DMG400009114,PGSC0003DMG400000890,PGSC0003DM…
GO:0004312	fatty acid synthase activity	molecular_function	0.024334	0.41811	11	2644	54	29181	PGSC0003DMG400013443,PGSC0003DMG400004253,PGSC0003DMG400010819,PGSC0003DMG400022750,PGSC0003DMG400025587,PGSC0003DMG400029620,Novel02719,Novel01813,PGSC0003DMG400012522,PGSC0003DMG400019110,PGSC0003DMG401017380
GO:0052689	carboxylic ester hydrolase activity	molecular_function	0.024405	0.41811	36	2644	268	29181	PGSC0003DMG400022493,PGSC0003DMG400006709,PGSC0003DMG400001382,PGSC0003DMG400022911,PGSC0003DMG400023822,PGSC0003DMG400025814,Novel02921,PGSC0003DMG400025808,Novel00283,PGSC0003DMG402023438,PGSC0003DMG400020365,PGSC0003DMG400031845,PGSC0003DMG400033029,PGSC0003DMG400004629,PGSC0003DMG400009177,PGSC0003DMG400008308,PGSC0003DMG400014543,PGSC0003DMG400011038,PGSC0003DMG400002074,PGSC0003DMG400012602…
GO:0044767	single-organism developmental process	biological_process	0.024462	0.41811	91	2644	786	29181	PGSC0003DMG400017152,PGSC0003DMG400033060,PGSC0003DMG400021676,PGSC0003DMG400010772,PGSC0003DMG400010097,PGSC0003DMG400012176,PGSC0003DMG400003805,PGSC0003DMG400013924,PGSC0003DMG400030902,PGSC0003DMG400015477,PGSC0003DMG400010999,PGSC0003DMG400033335,PGSC0003DMG400000723,PGSC0003DMG400021394,PGSC0003DMG402030499,PGSC0003DMG400011365,PGSC0003DMG400013633,PGSC0003DMG400030337,PGSC0003DMG400008004,…
GO:0098656	anion transmembrane transport	biological_process	0.024506	0.41811	15	2644	84	29181	PGSC0003DMG400008360,PGSC0003DMG400006021,PGSC0003DMG400011538,PGSC0003DMG400024998,PGSC0003DMG400007597,PGSC0003DMG400013282,PGSC0003DMG400032226,PGSC0003DMG400011771,PGSC0003DMG400030568,PGSC0003DMG400021102,PGSC0003DMG400007784,PGSC0003DMG400014203,PGSC0003DMG400032227,PGSC0003DMG400013886,PGSC0003DMG400020266
GO:0051119	sugar transmembrane transporter activity	molecular_function	0.02456	0.41811	7	2644	32	29181	PGSC0003DMG400021023,PGSC0003DMG400021614,Novel00909,PGSC0003DMG400002133,PGSC0003DMG400011249,PGSC0003DMG400009074,PGSC0003DMG400016649
GO:0015075	ion transmembrane transporter activity	molecular_function	0.024862	0.41943	197	2644	1839	29181	PGSC0003DMG400003993,PGSC0003DMG400003340,PGSC0003DMG400008936,PGSC0003DMG400011249,PGSC0003DMG400004318,PGSC0003DMG400021102,PGSC0003DMG401028367,PGSC0003DMG400032226,PGSC0003DMG400023464,PGSC0003DMG400013474,PGSC0003DMG400004753,PGSC0003DMG400028137,PGSC0003DMG400002852,PGSC0003DMG400013108,PGSC0003DMG400021614,PGSC0003DMG400000931,PGSC0003DMG400008751,PGSC0003DMG400021023,PGSC0003DMG400006871,…
GO:0044237	cellular metabolic process	biological_process	0.024951	0.41943	1314	2644	13511	29181	PGSC0003DMG400032498,PGSC0003DMG400025055,PGSC0003DMG401014249,PGSC0003DMG400009965,PGSC0003DMG402008890,Novel02003,PGSC0003DMG400009051,PGSC0003DMG400031457,PGSC0003DMG400004571,PGSC0003DMG400016159,PGSC0003DMG400011087,PGSC0003DMG400007626,PGSC0003DMG400026411,PGSC0003DMG401004033,PGSC0003DMG400026035,PGSC0003DMG400000728,PGSC0003DMG400018331,PGSC0003DMG400021264,PGSC0003DMG400035836,PGSC0003DM…
GO:0034219	carbohydrate transmembrane transport	biological_process	0.02498	0.41943	4	2644	13	29181	PGSC0003DMG400028374,PGSC0003DMG400013282,PGSC0003DMG401003297,PGSC0003DMG400009830
GO:0005975	carbohydrate metabolic process	biological_process	0.025047	0.41943	190	2644	1710	29181	PGSC0003DMG400032510,PGSC0003DMG402012862,Novel03255,PGSC0003DMG400009883,PGSC0003DMG400016121,PGSC0003DMG400000060,PGSC0003DMG400011246,PGSC0003DMG402016475,PGSC0003DMG400018338,PGSC0003DMG402017902,PGSC0003DMG400001566,PGSC0003DMG400024755,PGSC0003DMG400014823,PGSC0003DMG401031064,Novel01463,PGSC0003DMG400014540,PGSC0003DMG400014600,PGSC0003DMG400012852,PGSC0003DMG400022104,PGSC0003DMG400006157…
GO:0044444	cytoplasmic part	cellular_component	0.025175	0.41943	354	2644	3499	29181	Novel01266,PGSC0003DMG400023039,PGSC0003DMG400025587,PGSC0003DMG401009709,PGSC0003DMG400026411,PGSC0003DMG400024763,PGSC0003DMG400016457,PGSC0003DMG400016159,PGSC0003DMG400004571,PGSC0003DMG400033063,PGSC0003DMG400031787,PGSC0003DMG400023512,PGSC0003DMG400018331,PGSC0003DMG400022391,PGSC0003DMG400026784,PGSC0003DMG400031812,PGSC0003DMG400002756,PGSC0003DMG400004685,PGSC0003DMG400009063,PGSC0003DM…
GO:0008653	lipopolysaccharide metabolic process	biological_process	0.025234	0.41943	9	2644	45	29181	PGSC0003DMG400004253,PGSC0003DMG400008447,PGSC0003DMG400012721,PGSC0003DMG400013443,PGSC0003DMG400015214,PGSC0003DMG400003417,PGSC0003DMG400017516,PGSC0003DMG400028538,PGSC0003DMG400027050
GO:0009103	lipopolysaccharide biosynthetic process	biological_process	0.025234	0.41943	9	2644	45	29181	PGSC0003DMG400013443,PGSC0003DMG400008447,PGSC0003DMG400004253,PGSC0003DMG400012721,PGSC0003DMG400015214,PGSC0003DMG400017516,PGSC0003DMG400003417,PGSC0003DMG400028538,PGSC0003DMG400027050
GO:0015948	methanogenesis	biological_process	0.025561	0.41965	18	2644	116	29181	PGSC0003DMG400000896,PGSC0003DMG400030630,PGSC0003DMG400013408,PGSC0003DMG400014183,PGSC0003DMG400018618,PGSC0003DMG400007295,PGSC0003DMG400009956,PGSC0003DMG400028406,PGSC0003DMG400007488,PGSC0003DMG400015909,PGSC0003DMG400003889,PGSC0003DMG402013561,PGSC0003DMG400010097,PGSC0003DMG400006270,PGSC0003DMG400001752,PGSC0003DMG400019991,Novel00852,PGSC0003DMG400000839
GO:0015975	energy derivation by oxidation of reduced inorganic compounds	biological_process	0.025561	0.41965	18	2644	116	29181	PGSC0003DMG400030630,PGSC0003DMG400018618,PGSC0003DMG400007295,PGSC0003DMG400013408,PGSC0003DMG400014183,PGSC0003DMG400000896,PGSC0003DMG400001752,PGSC0003DMG400019991,Novel00852,PGSC0003DMG400006270,PGSC0003DMG400010097,PGSC0003DMG400000839,PGSC0003DMG400007488,PGSC0003DMG400028406,PGSC0003DMG400009956,PGSC0003DMG400003889,PGSC0003DMG402013561,PGSC0003DMG400015909
GO:0043447	alkane biosynthetic process	biological_process	0.025561	0.41965	18	2644	116	29181	PGSC0003DMG400007295,PGSC0003DMG400018618,PGSC0003DMG400014183,PGSC0003DMG400013408,PGSC0003DMG400030630,PGSC0003DMG400000896,PGSC0003DMG400000839,PGSC0003DMG400019991,Novel00852,PGSC0003DMG400001752,PGSC0003DMG400006270,PGSC0003DMG400010097,PGSC0003DMG402013561,PGSC0003DMG400003889,PGSC0003DMG400015909,PGSC0003DMG400007488,PGSC0003DMG400009956,PGSC0003DMG400028406
GO:0032502	developmental process	biological_process	0.025589	0.41965	97	2644	844	29181	PGSC0003DMG400012176,PGSC0003DMG400003805,PGSC0003DMG400021102,PGSC0003DMG400010772,PGSC0003DMG400010097,PGSC0003DMG400021676,PGSC0003DMG400017152,PGSC0003DMG400033060,PGSC0003DMG400003122,PGSC0003DMG400006022,PGSC0003DMG400008004,PGSC0003DMG400030337,PGSC0003DMG400013633,PGSC0003DMG400021394,PGSC0003DMG402030499,PGSC0003DMG400011365,PGSC0003DMG400000723,PGSC0003DMG400033335,PGSC0003DMG400011640,…
GO:0051156	glucose 6-phosphate metabolic process	biological_process	0.026239	0.42842	4	2644	13	29181	PGSC0003DMG400001932,PGSC0003DMG400025121,PGSC0003DMG400005961,PGSC0003DMG400030509
GO:0005618	cell wall	cellular_component	0.026297	0.42842	25	2644	177	29181	PGSC0003DMG400002074,PGSC0003DMG400026385,PGSC0003DMG401009709,PGSC0003DMG400017299,PGSC0003DMG400017298,PGSC0003DMG400015933,PGSC0003DMG400003866,PGSC0003DMG400002545,PGSC0003DMG400004824,PGSC0003DMG401018740,PGSC0003DMG400009178,PGSC0003DMG400009177,PGSC0003DMG400031262,PGSC0003DMG400031816,PGSC0003DMG400014024,PGSC0003DMG400014823,PGSC0003DMG400012997,PGSC0003DMG400024755,PGSC0003DMG400027188,…
GO:0017013	protein flavinylation	biological_process	0.026643	0.42934	2	2644	3	29181	PGSC0003DMG400024300,PGSC0003DMG400028393
GO:0006783	heme biosynthetic process	biological_process	0.026875	0.42934	14	2644	84	29181	Novel01240,PGSC0003DMG400023975,Novel03619,PGSC0003DMG400027156,PGSC0003DMG400023424,PGSC0003DMG400015678,Novel03103,PGSC0003DMG402001978,PGSC0003DMG400022405,PGSC0003DMG400004572,PGSC0003DMG400002201,PGSC0003DMG400018665,PGSC0003DMG402028101,PGSC0003DMG401021138
GO:0043231	intracellular membrane-bounded organelle	cellular_component	0.026976	0.42934	549	2644	5486	29181	Novel02732,PGSC0003DMG400029576,PGSC0003DMG400018509,PGSC0003DMG400025161,PGSC0003DMG400023464,PGSC0003DMG400012034,PGSC0003DMG400007073,PGSC0003DMG400020885,PGSC0003DMG400012984,PGSC0003DMG400000301,PGSC0003DMG400025931,PGSC0003DMG400033335,PGSC0003DMG400024310,PGSC0003DMG400030337,PGSC0003DMG401024899,PGSC0003DMG400008751,PGSC0003DMG400030840,PGSC0003DMG400022038,PGSC0003DMG400007316,PGSC0003DM…
GO:0006811	ion transport	biological_process	0.027002	0.42934	214	2644	2011	29181	Novel02588,Novel01055,PGSC0003DMG400009074,PGSC0003DMG400015263,PGSC0003DMG400025523,PGSC0003DMG400005668,PGSC0003DMG400009154,PGSC0003DMG400030453,PGSC0003DMG400018792,PGSC0003DMG400017824,PGSC0003DMG400010794,PGSC0003DMG400021394,PGSC0003DMG400017976,PGSC0003DMG400017350,PGSC0003DMG400015405,PGSC0003DMG400016505,PGSC0003DMG400004439,PGSC0003DMG400025038,PGSC0003DMG400015015,PGSC0003DMG400021322…
GO:0009832	plant-type cell wall biogenesis	biological_process	0.027052	0.42934	5	2644	18	29181	Novel01842,PGSC0003DMG400002075,PGSC0003DMG400026565,PGSC0003DMG400006286,PGSC0003DMG400025627
GO:0010215	cellulose microfibril organization	biological_process	0.027052	0.42934	5	2644	18	29181	PGSC0003DMG400026565,PGSC0003DMG400002075,PGSC0003DMG400006286,Novel01842,PGSC0003DMG400025627
GO:0070726	cell wall assembly	biological_process	0.027052	0.42934	5	2644	18	29181	PGSC0003DMG400025627,PGSC0003DMG400006286,PGSC0003DMG400002075,PGSC0003DMG400026565,Novel01842
GO:0071668	plant-type cell wall assembly	biological_process	0.027052	0.42934	5	2644	18	29181	Novel01842,PGSC0003DMG400002075,PGSC0003DMG400006286,PGSC0003DMG400026565,PGSC0003DMG400025627
GO:0015718	monocarboxylic acid transport	biological_process	0.027292	0.43039	8	2644	42	29181	PGSC0003DMG400009074,PGSC0003DMG400008270,PGSC0003DMG400013268,PGSC0003DMG400012255,PGSC0003DMG400013282,PGSC0003DMG400024763,PGSC0003DMG400016803,PGSC0003DMG400026982
GO:0016682	oxidoreductase activity, acting on diphenols and related substances as donors, oxygen as acceptor	molecular_function	0.027293	0.43039	9	2644	44	29181	PGSC0003DMG400018914,PGSC0003DMG400029575,PGSC0003DMG400018916,PGSC0003DMG400002678,PGSC0003DMG400007614,PGSC0003DMG400029576,PGSC0003DMG400010231,PGSC0003DMG400007613,PGSC0003DMG400000464
GO:0003333	amino acid transmembrane transport	biological_process	0.027406	0.43079	14	2644	78	29181	PGSC0003DMG400011538,PGSC0003DMG400006021,PGSC0003DMG400008360,PGSC0003DMG400032226,PGSC0003DMG400011771,PGSC0003DMG400030568,PGSC0003DMG400021102,PGSC0003DMG400024998,PGSC0003DMG400007597,PGSC0003DMG400007784,PGSC0003DMG400014203,PGSC0003DMG400032227,PGSC0003DMG400020266,PGSC0003DMG400013886
GO:0016836	hydro-lyase activity	molecular_function	0.027512	0.43108	27	2644	191	29181	PGSC0003DMG400005284,PGSC0003DMG402000722,PGSC0003DMG400011044,PGSC0003DMG400001444,PGSC0003DMG400028406,PGSC0003DMG400012802,PGSC0003DMG400022568,PGSC0003DMG400005246,PGSC0003DMG400001206,PGSC0003DMG400028234,PGSC0003DMG400000376,PGSC0003DMG400008827,PGSC0003DMG400014624,PGSC0003DMG400016478,PGSC0003DMG400013273,Novel00276,PGSC0003DMG400016285,PGSC0003DMG400026536,PGSC0003DMG400025384,PGSC0003DM…
GO:0009653	anatomical structure morphogenesis	biological_process	0.02772	0.43215	38	2644	289	29181	PGSC0003DMG400020292,PGSC0003DMG400000723,PGSC0003DMG400013924,PGSC0003DMG400030662,PGSC0003DMG400027523,PGSC0003DMG400011541,PGSC0003DMG400022888,PGSC0003DMG400015477,PGSC0003DMG400030902,PGSC0003DMG400010999,PGSC0003DMG400008004,PGSC0003DMG400023440,PGSC0003DMG400003122,PGSC0003DMG400006160,PGSC0003DMG400021394,PGSC0003DMG400010092,PGSC0003DMG400010772,PGSC0003DMG400010097,PGSC0003DMG400012966,…
GO:0008092	cytoskeletal protein binding	molecular_function	0.027756	0.43215	73	2644	609	29181	PGSC0003DMG400022749,Novel01960,PGSC0003DMG400022759,PGSC0003DMG400004900,PGSC0003DMG400022318,Novel01446,PGSC0003DMG400008437,PGSC0003DMG400002396,PGSC0003DMG402003179,PGSC0003DMG400007713,PGSC0003DMG400007614,PGSC0003DMG400011322,PGSC0003DMG400010998,PGSC0003DMG400005572,PGSC0003DMG400017494,PGSC0003DMG400030551,PGSC0003DMG400014055,PGSC0003DMG400007626,PGSC0003DMG400011768,PGSC0003DMG400029713…
GO:0006012	galactose metabolic process	biological_process	0.028008	0.43222	5	2644	18	29181	PGSC0003DMG400006270,PGSC0003DMG400017309,PGSC0003DMG400022276,PGSC0003DMG400001459,PGSC0003DMG400032510
GO:0015293	symporter activity	molecular_function	0.028299	0.43222	9	2644	48	29181	PGSC0003DMG400021614,PGSC0003DMG400001410,PGSC0003DMG400021023,PGSC0003DMG400016649,PGSC0003DMG400002133,PGSC0003DMG400011249,Novel00909,PGSC0003DMG400009074,PGSC0003DMG400016891
GO:0015294	solute:cation symporter activity	molecular_function	0.028299	0.43222	9	2644	48	29181	PGSC0003DMG400001410,PGSC0003DMG400021023,PGSC0003DMG400021614,PGSC0003DMG400016649,Novel00909,PGSC0003DMG400002133,PGSC0003DMG400011249,PGSC0003DMG400009074,PGSC0003DMG400016891
GO:0019783	ubiquitin-like protein-specific protease activity	molecular_function	0.028531	0.43222	8	2644	37	29181	PGSC0003DMG400026229,PGSC0003DMG400017753,PGSC0003DMG400023440,PGSC0003DMG400023590,PGSC0003DMG400019587,PGSC0003DMG400028377,PGSC0003DMG400030814,PGSC0003DMG400017516
GO:0055076	transition metal ion homeostasis	biological_process	0.028774	0.43222	8	2644	41	29181	PGSC0003DMG400033637,PGSC0003DMG400016247,PGSC0003DMG400008437,PGSC0003DMG402020908,PGSC0003DMG400020906,PGSC0003DMG401020908,PGSC0003DMG400008358,PGSC0003DMG400009472
GO:0006743	ubiquinone metabolic process	biological_process	0.028788	0.43222	5	2644	18	29181	PGSC0003DMG400029794,PGSC0003DMG400007613,PGSC0003DMG400007614,PGSC0003DMG400006871,PGSC0003DMG402003112
GO:0006744	ubiquinone biosynthetic process	biological_process	0.028788	0.43222	5	2644	18	29181	PGSC0003DMG400029794,PGSC0003DMG400007613,PGSC0003DMG400007614,PGSC0003DMG400006871,PGSC0003DMG402003112
GO:0007289	spermatid nucleus differentiation	biological_process	0.028833	0.43222	3	2644	9	29181	PGSC0003DMG400002613,PGSC0003DMG400030337,PGSC0003DMG400021163
GO:0035092	sperm chromatin condensation	biological_process	0.028833	0.43222	3	2644	9	29181	PGSC0003DMG400021163,PGSC0003DMG400030337,PGSC0003DMG400002613
GO:0001933	negative regulation of protein phosphorylation	biological_process	0.02899	0.43222	3	2644	7	29181	PGSC0003DMG400007819,PGSC0003DMG400022507,PGSC0003DMG400027771
GO:0004862	cAMP-dependent protein kinase inhibitor activity	molecular_function	0.02899	0.43222	3	2644	7	29181	PGSC0003DMG400027771,PGSC0003DMG400007819,PGSC0003DMG400022507
GO:0006469	negative regulation of protein kinase activity	biological_process	0.02899	0.43222	3	2644	7	29181	PGSC0003DMG400027771,PGSC0003DMG400022507,PGSC0003DMG400007819
GO:0033673	negative regulation of kinase activity	biological_process	0.02899	0.43222	3	2644	7	29181	PGSC0003DMG400007819,PGSC0003DMG400022507,PGSC0003DMG400027771
GO:0042326	negative regulation of phosphorylation	biological_process	0.02899	0.43222	3	2644	7	29181	PGSC0003DMG400027771,PGSC0003DMG400007819,PGSC0003DMG400022507
GO:0004180	carboxypeptidase activity	molecular_function	0.029733	0.44065	15	2644	91	29181	PGSC0003DMG400021866,PGSC0003DMG400007137,PGSC0003DMG400003241,PGSC0003DMG402010623,PGSC0003DMG400027012,PGSC0003DMG400027263,PGSC0003DMG400012133,PGSC0003DMG400022103,PGSC0003DMG400024802,PGSC0003DMG400001455,Novel00298,PGSC0003DMG400005668,PGSC0003DMG400014250,PGSC0003DMG400028787,Novel02259
GO:0004315	3-oxoacyl-[acyl-carrier-protein] synthase activity	molecular_function	0.029997	0.44065	10	2644	49	29181	PGSC0003DMG400019110,PGSC0003DMG400012522,PGSC0003DMG401017380,PGSC0003DMG400022750,PGSC0003DMG400010819,PGSC0003DMG400004253,PGSC0003DMG400013443,Novel01813,PGSC0003DMG400029620,PGSC0003DMG400025587
GO:0004620	phospholipase activity	molecular_function	0.030002	0.44065	8	2644	41	29181	PGSC0003DMG400012602,PGSC0003DMG400006622,PGSC0003DMG400028214,Novel02921,PGSC0003DMG400009025,PGSC0003DMG400006621,PGSC0003DMG400020264,PGSC0003DMG400011937
GO:0009271	phage shock	biological_process	0.03012	0.44065	8	2644	40	29181	PGSC0003DMG401005729,PGSC0003DMG400026278,PGSC0003DMG400019587,PGSC0003DMG400013886,PGSC0003DMG400023590,PGSC0003DMG400020626,PGSC0003DMG400004900,PGSC0003DMG400016221
GO:0098586	cellular response to virus	biological_process	0.03012	0.44065	8	2644	40	29181	PGSC0003DMG400023590,PGSC0003DMG400013886,PGSC0003DMG400019587,PGSC0003DMG400026278,PGSC0003DMG401005729,PGSC0003DMG400016221,PGSC0003DMG400004900,PGSC0003DMG400020626
GO:0005741	mitochondrial outer membrane	cellular_component	0.030183	0.44065	30	2644	230	29181	PGSC0003DMG400006896,PGSC0003DMG400025161,PGSC0003DMG400007316,PGSC0003DMG400011133,Novel01580,PGSC0003DMG401025764,PGSC0003DMG400022391,Novel03146,PGSC0003DMG400016015,PGSC0003DMG400002066,PGSC0003DMG401000057,PGSC0003DMG400007597,Novel03389,PGSC0003DMG400013894,Novel02679,PGSC0003DMG402028101,PGSC0003DMG400000864,PGSC0003DMG400023130,PGSC0003DMG400030058,Novel01266,PGSC0003DMG400029967,PGSC0003…
GO:0031968	organelle outer membrane	cellular_component	0.030183	0.44065	30	2644	230	29181	PGSC0003DMG400011731,PGSC0003DMG400024615,PGSC0003DMG401022600,PGSC0003DMG400009093,PGSC0003DMG400022358,PGSC0003DMG400033637,PGSC0003DMG400018823,Novel01266,PGSC0003DMG400000864,PGSC0003DMG400023130,PGSC0003DMG400030058,PGSC0003DMG400029803,PGSC0003DMG400030630,PGSC0003DMG400029967,Novel03389,Novel02679,PGSC0003DMG400013894,PGSC0003DMG401000057,PGSC0003DMG400007597,PGSC0003DMG402028101,PGSC0003D…
GO:0000981	RNA polymerase II transcription factor activity, sequence-specific DNA binding	molecular_function	0.030782	0.44806	7	2644	33	29181	PGSC0003DMG400004746,PGSC0003DMG400000931,PGSC0003DMG400005956,PGSC0003DMG400011365,PGSC0003DMG400031267,PGSC0003DMG400010788,PGSC0003DMG400030551
GO:0009073	aromatic amino acid family biosynthetic process	biological_process	0.031743	0.4607	9	2644	45	29181	PGSC0003DMG400023957,PGSC0003DMG400013273,PGSC0003DMG400026536,PGSC0003DMG400016478,PGSC0003DMG400020334,PGSC0003DMG400024392,PGSC0003DMG400014543,PGSC0003DMG400030683,PGSC0003DMG400007122
GO:0022904	respiratory electron transport chain	biological_process	0.031922	0.46194	19	2644	130	29181	PGSC0003DMG400030439,PGSC0003DMG401033880,PGSC0003DMG400007913,PGSC0003DMG400001854,Novel02377,PGSC0003DMG400018150,PGSC0003DMG400021686,PGSC0003DMG400026342,PGSC0003DMG400029087,PGSC0003DMG400030941,PGSC0003DMG400024081,PGSC0003DMG400016918,PGSC0003DMG400015276,PGSC0003DMG400018535,PGSC0003DMG400018635,PGSC0003DMG400002497,PGSC0003DMG400015599,PGSC0003DMG400007552,PGSC0003DMG400010084
GO:0016209	antioxidant activity	molecular_function	0.032018	0.46196	34	2644	267	29181	PGSC0003DMG400022103,PGSC0003DMG400011640,PGSC0003DMG400017948,PGSC0003DMG401029613,Novel02721,PGSC0003DMG400014055,PGSC0003DMG400021685,PGSC0003DMG400026281,PGSC0003DMG401025083,Novel02698,Novel01675,PGSC0003DMG400002848,PGSC0003DMG402005074,PGSC0003DMG400024754,PGSC0003DMG400025084,PGSC0003DMG400003241,PGSC0003DMG400014867,PGSC0003DMG400002190,PGSC0003DMG400014168,PGSC0003DMG400020494,PGSC0003D…
GO:0032403	protein complex binding	molecular_function	0.032398	0.46535	47	2644	368	29181	PGSC0003DMG400004253,PGSC0003DMG400003089,PGSC0003DMG400027381,PGSC0003DMG400012522,PGSC0003DMG402002542,PGSC0003DMG400012206,PGSC0003DMG400022500,PGSC0003DMG400003889,PGSC0003DMG400008553,Novel00629,PGSC0003DMG400012451,PGSC0003DMG400004943,PGSC0003DMG400019677,PGSC0003DMG400022750,PGSC0003DMG400002539,PGSC0003DMG400000248,PGSC0003DMG400024955,PGSC0003DMG400025428,PGSC0003DMG400029788,PGSC0003DM…
GO:0031975	envelope	cellular_component	0.03247	0.46535	94	2644	858	29181	PGSC0003DMG400007597,PGSC0003DMG400026982,PGSC0003DMG400013894,PGSC0003DMG400020649,PGSC0003DMG400013975,PGSC0003DMG400016918,PGSC0003DMG400025038,PGSC0003DMG400025161,PGSC0003DMG400010177,PGSC0003DMG400000421,PGSC0003DMG401025764,PGSC0003DMG400005662,PGSC0003DMG400024615,PGSC0003DMG400008751,PGSC0003DMG400003122,PGSC0003DMG400015405,PGSC0003DMG400033637,PGSC0003DMG400015263,PGSC0003DMG400000301,…
GO:0019645	anaerobic electron transport chain	biological_process	0.03254	0.46535	2	2644	3	29181	PGSC0003DMG400001854,PGSC0003DMG400024081
GO:0008081	phosphoric diester hydrolase activity	molecular_function	0.032631	0.46535	15	2644	98	29181	PGSC0003DMG400004067,PGSC0003DMG400006621,PGSC0003DMG400001752,PGSC0003DMG400005284,Novel01884,PGSC0003DMG403020240,PGSC0003DMG400011937,PGSC0003DMG400020264,PGSC0003DMG400029552,PGSC0003DMG400006622,PGSC0003DMG400028214,PGSC0003DMG400022294,PGSC0003DMG400009025,PGSC0003DMG400024591,PGSC0003DMG400015230
GO:0042181	ketone biosynthetic process	biological_process	0.033127	0.47096	8	2644	39	29181	PGSC0003DMG400007613,PGSC0003DMG400007614,PGSC0003DMG400025792,PGSC0003DMG400030814,PGSC0003DMG400000723,PGSC0003DMG400029794,PGSC0003DMG400006871,PGSC0003DMG402003112
GO:0016627	oxidoreductase activity, acting on the CH-CH group of donors	molecular_function	0.033487	0.47096	34	2644	255	29181	PGSC0003DMG400018665,PGSC0003DMG402001978,PGSC0003DMG400022405,PGSC0003DMG401021138,PGSC0003DMG402028101,PGSC0003DMG400019202,PGSC0003DMG400015211,Novel03103,PGSC0003DMG400029938,Novel02719,PGSC0003DMG400023957,PGSC0003DMG400023428,Novel01240,Novel03619,PGSC0003DMG400004572,PGSC0003DMG400023975,PGSC0003DMG400000404,PGSC0003DMG400004828,PGSC0003DMG400012550,PGSC0003DMG400027735,PGSC0003DMG40000375…
GO:0015947	methane metabolic process	biological_process	0.033539	0.47096	18	2644	120	29181	PGSC0003DMG400000896,PGSC0003DMG400007295,PGSC0003DMG400018618,PGSC0003DMG400014183,PGSC0003DMG400013408,PGSC0003DMG400030630,PGSC0003DMG402013561,PGSC0003DMG400003889,PGSC0003DMG400015909,PGSC0003DMG400007488,PGSC0003DMG400009956,PGSC0003DMG400028406,PGSC0003DMG400000839,Novel00852,PGSC0003DMG400019991,PGSC0003DMG400001752,PGSC0003DMG400010097,PGSC0003DMG400006270
GO:0043446	cellular alkane metabolic process	biological_process	0.033539	0.47096	18	2644	120	29181	PGSC0003DMG400014183,PGSC0003DMG400013408,PGSC0003DMG400007295,PGSC0003DMG400018618,PGSC0003DMG400030630,PGSC0003DMG400000896,PGSC0003DMG400000839,PGSC0003DMG400006270,PGSC0003DMG400010097,Novel00852,PGSC0003DMG400019991,PGSC0003DMG400001752,PGSC0003DMG400015909,PGSC0003DMG402013561,PGSC0003DMG400003889,PGSC0003DMG400009956,PGSC0003DMG400028406,PGSC0003DMG400007488
GO:0006551	leucine metabolic process	biological_process	0.033599	0.47096	5	2644	18	29181	PGSC0003DMG400004351,PGSC0003DMG400020321,PGSC0003DMG400014622,PGSC0003DMG400028102,PGSC0003DMG400021507
GO:0009098	leucine biosynthetic process	biological_process	0.033599	0.47096	5	2644	18	29181	PGSC0003DMG400004351,PGSC0003DMG400020321,PGSC0003DMG400028102,PGSC0003DMG400014622,PGSC0003DMG400021507
GO:1901607	alpha-amino acid biosynthetic process	biological_process	0.033865	0.47334	40	2644	306	29181	PGSC0003DMG400016478,PGSC0003DMG400025931,PGSC0003DMG400013273,PGSC0003DMG400014379,PGSC0003DMG400018793,PGSC0003DMG400023608,PGSC0003DMG400004572,PGSC0003DMG400014592,PGSC0003DMG400014622,PGSC0003DMG400008852,PGSC0003DMG400023957,PGSC0003DMG400012297,PGSC0003DMG400010674,Novel01240,PGSC0003DMG400010485,PGSC0003DMG400013235,PGSC0003DMG400020321,PGSC0003DMG402028101,PGSC0003DMG400029938,PGSC0003DM…
GO:0052736	beta-glucanase activity	molecular_function	0.034358	0.47617	2	2644	3	29181	PGSC0003DMG400044116,PGSC0003DMG400039856
GO:0052861	glucan endo-1,3-beta-glucanase activity, C-3 substituted reducing group	molecular_function	0.034358	0.47617	2	2644	3	29181	PGSC0003DMG400044116,PGSC0003DMG400039856
GO:0052862	glucan endo-1,4-beta-glucanase activity, C-3 substituted reducing group	molecular_function	0.034358	0.47617	2	2644	3	29181	PGSC0003DMG400039856,PGSC0003DMG400044116
GO:0044455	mitochondrial membrane part	cellular_component	0.034689	0.4794	51	2644	427	29181	PGSC0003DMG400031832,PGSC0003DMG400029967,PGSC0003DMG400030630,PGSC0003DMG400028842,PGSC0003DMG400029803,PGSC0003DMG400023130,PGSC0003DMG400001656,PGSC0003DMG401017657,PGSC0003DMG400012640,PGSC0003DMG400004449,PGSC0003DMG400029087,PGSC0003DMG400011578,PGSC0003DMG400018823,PGSC0003DMG400026342,PGSC0003DMG400031755,PGSC0003DMG400022358,PGSC0003DMG400008961,PGSC0003DMG400021686,PGSC0003DMG400030701,…
GO:0008237	metallopeptidase activity	molecular_function	0.035017	0.48259	35	2644	263	29181	PGSC0003DMG400022026,PGSC0003DMG400009822,PGSC0003DMG400001924,PGSC0003DMG402028340,PGSC0003DMG400021558,PGSC0003DMG400009004,PGSC0003DMG400028787,PGSC0003DMG400047346,PGSC0003DMG400019991,PGSC0003DMG400007562,PGSC0003DMG400012340,PGSC0003DMG400027735,Novel01650,PGSC0003DMG400013779,PGSC0003DMG400012910,PGSC0003DMG400001923,PGSC0003DMG400004818,PGSC0003DMG400001122,Novel01649,PGSC0003DMG400001399…
GO:0006073	cellular glucan metabolic process	biological_process	0.035589	0.48774	23	2644	160	29181	PGSC0003DMG400029938,PGSC0003DMG401003156,PGSC0003DMG400002396,PGSC0003DMG400014823,PGSC0003DMG400024755,PGSC0003DMG400029348,PGSC0003DMG400024060,PGSC0003DMG400020321,PGSC0003DMG400013975,PGSC0003DMG400031262,PGSC0003DMG400012852,PGSC0003DMG400014024,PGSC0003DMG400002545,PGSC0003DMG400004824,PGSC0003DMG401018740,PGSC0003DMG400003866,PGSC0003DMG400009883,PGSC0003DMG400017298,PGSC0003DMG400010794,…
GO:0044042	glucan metabolic process	biological_process	0.035589	0.48774	23	2644	160	29181	PGSC0003DMG400012852,PGSC0003DMG400031262,PGSC0003DMG400014024,PGSC0003DMG400029938,PGSC0003DMG400014823,PGSC0003DMG400024755,PGSC0003DMG401003156,PGSC0003DMG400002396,PGSC0003DMG400020321,PGSC0003DMG400024060,PGSC0003DMG400029348,PGSC0003DMG400013975,PGSC0003DMG400009883,PGSC0003DMG400010794,Novel03255,PGSC0003DMG400017298,PGSC0003DMG400024627,PGSC0003DMG400017299,PGSC0003DMG400003067,PGSC0003DM…
GO:1903509	liposaccharide metabolic process	biological_process	0.036005	0.48913	38	2644	293	29181	PGSC0003DMG400008447,PGSC0003DMG400009965,PGSC0003DMG400003509,PGSC0003DMG400006410,PGSC0003DMG400017516,PGSC0003DMG400005668,PGSC0003DMG401018740,PGSC0003DMG400028538,PGSC0003DMG400004274,PGSC0003DMG400002204,PGSC0003DMG400027050,PGSC0003DMG400013443,PGSC0003DMG400026516,PGSC0003DMG400028124,PGSC0003DMG400019873,PGSC0003DMG401028367,PGSC0003DMG400001363,PGSC0003DMG400004318,PGSC0003DMG400018670,…
GO:0098588	bounding membrane of organelle	cellular_component	0.036109	0.48913	103	2644	926	29181	PGSC0003DMG400007819,Novel01266,PGSC0003DMG400015448,PGSC0003DMG400019274,PGSC0003DMG400011768,PGSC0003DMG400005019,Novel00909,PGSC0003DMG400009887,PGSC0003DMG400011731,PGSC0003DMG401018740,PGSC0003DMG400008000,PGSC0003DMG400026411,PGSC0003DMG401022600,PGSC0003DMG400026784,PGSC0003DMG400001808,PGSC0003DMG400030082,PGSC0003DMG400024860,PGSC0003DMG400022391,PGSC0003DMG400022200,PGSC0003DMG400006896…
GO:0005351	sugar:proton symporter activity	molecular_function	0.036393	0.48913	6	2644	28	29181	Novel00909,PGSC0003DMG400002133,PGSC0003DMG400011249,PGSC0003DMG400016649,PGSC0003DMG400021023,PGSC0003DMG400021614
GO:0015295	solute:proton symporter activity	molecular_function	0.036393	0.48913	6	2644	28	29181	PGSC0003DMG400021023,PGSC0003DMG400021614,PGSC0003DMG400016649,Novel00909,PGSC0003DMG400011249,PGSC0003DMG400002133
GO:0019354	siroheme biosynthetic process	biological_process	0.036426	0.48913	12	2644	71	29181	Novel03103,PGSC0003DMG400015678,PGSC0003DMG401021138,PGSC0003DMG402028101,PGSC0003DMG400018665,PGSC0003DMG402001978,PGSC0003DMG400022405,PGSC0003DMG400004572,Novel03619,Novel01240,PGSC0003DMG400023424,PGSC0003DMG400027156
GO:0043115	precorrin-2 dehydrogenase activity	molecular_function	0.036426	0.48913	12	2644	71	29181	PGSC0003DMG400004572,PGSC0003DMG402001978,PGSC0003DMG400022405,PGSC0003DMG400018665,PGSC0003DMG402028101,PGSC0003DMG401021138,Novel03103,PGSC0003DMG400015678,PGSC0003DMG400027156,PGSC0003DMG400023424,Novel01240,Novel03619
GO:0046156	siroheme metabolic process	biological_process	0.036426	0.48913	12	2644	71	29181	PGSC0003DMG400015678,Novel03103,PGSC0003DMG400018665,PGSC0003DMG400022405,PGSC0003DMG402001978,PGSC0003DMG400004572,PGSC0003DMG401021138,PGSC0003DMG402028101,Novel01240,Novel03619,PGSC0003DMG400023424,PGSC0003DMG400027156
GO:0005136	interleukin-4 receptor binding	molecular_function	0.036486	0.48913	3	2644	8	29181	PGSC0003DMG400018792,PGSC0003DMG400006286,PGSC0003DMG400018259
GO:0008250	oligosaccharyltransferase complex	cellular_component	0.036671	0.48918	5	2644	22	29181	PGSC0003DMG401014605,PGSC0003DMG400027080,PGSC0003DMG400026456,PGSC0003DMG400027509,PGSC0003DMG400025078
GO:0006816	calcium ion transport	biological_process	0.036688	0.48918	12	2644	70	29181	PGSC0003DMG400010617,PGSC0003DMG400013474,PGSC0003DMG400014173,Novel01511,PGSC0003DMG400009180,PGSC0003DMG400030882,PGSC0003DMG402008889,PGSC0003DMG400005160,PGSC0003DMG400001419,PGSC0003DMG400026304,PGSC0003DMG400022639,PGSC0003DMG400006663
GO:0008652	cellular amino acid biosynthetic process	biological_process	0.036816	0.48955	45	2644	351	29181	PGSC0003DMG400021441,PGSC0003DMG400006140,PGSC0003DMG400000404,PGSC0003DMG400006955,PGSC0003DMG400032250,PGSC0003DMG400021507,PGSC0003DMG400004800,PGSC0003DMG400020601,PGSC0003DMG400028102,PGSC0003DMG400028127,PGSC0003DMG400027735,PGSC0003DMG400003755,PGSC0003DMG400014543,PGSC0003DMG400006286,PGSC0003DMG400007122,PGSC0003DMG400030683,PGSC0003DMG400015379,PGSC0003DMG400011218,PGSC0003DMG400026536,…
GO:1901605	alpha-amino acid metabolic process	biological_process	0.037263	0.49021	55	2644	442	29181	Novel01240,PGSC0003DMG400012297,PGSC0003DMG400010674,PGSC0003DMG400023957,PGSC0003DMG400013235,PGSC0003DMG400010485,PGSC0003DMG400008852,PGSC0003DMG400029938,PGSC0003DMG400012997,PGSC0003DMG400012802,PGSC0003DMG400020321,PGSC0003DMG402028101,PGSC0003DMG400006021,PGSC0003DMG400014379,PGSC0003DMG400013273,PGSC0003DMG400002612,PGSC0003DMG400016478,PGSC0003DMG400025005,PGSC0003DMG400025931,PGSC0003DM…
GO:0015849	organic acid transport	biological_process	0.037405	0.49021	28	2644	211	29181	PGSC0003DMG400011538,PGSC0003DMG400013268,PGSC0003DMG400008360,PGSC0003DMG400008270,PGSC0003DMG400024763,PGSC0003DMG400013282,PGSC0003DMG400027213,PGSC0003DMG400002539,PGSC0003DMG400007784,PGSC0003DMG400025523,PGSC0003DMG400009074,PGSC0003DMG400020266,PGSC0003DMG400003574,PGSC0003DMG400032227,PGSC0003DMG400006021,PGSC0003DMG400023518,PGSC0003DMG400001410,PGSC0003DMG400021102,PGSC0003DMG400026982,…
GO:0046942	carboxylic acid transport	biological_process	0.037405	0.49021	28	2644	211	29181	PGSC0003DMG400013282,PGSC0003DMG400024763,PGSC0003DMG400008360,PGSC0003DMG400008270,PGSC0003DMG400011538,PGSC0003DMG400013268,PGSC0003DMG400003574,PGSC0003DMG400020266,PGSC0003DMG400032227,PGSC0003DMG400009074,PGSC0003DMG400007784,PGSC0003DMG400025523,PGSC0003DMG400027213,PGSC0003DMG400002539,PGSC0003DMG400007597,PGSC0003DMG400024998,PGSC0003DMG400012255,PGSC0003DMG400026982,PGSC0003DMG400021102,…
GO:0033013	tetrapyrrole metabolic process	biological_process	0.037471	0.49021	54	2644	445	29181	PGSC0003DMG400017020,PGSC0003DMG401026555,PGSC0003DMG400011038,PGSC0003DMG400027156,PGSC0003DMG400012109,PGSC0003DMG400026132,PGSC0003DMG400008308,PGSC0003DMG400015678,PGSC0003DMG400004629,PGSC0003DMG400020294,PGSC0003DMG400027602,PGSC0003DMG400021456,PGSC0003DMG400034688,PGSC0003DMG400031845,PGSC0003DMG400033029,Novel00283,PGSC0003DMG400023424,PGSC0003DMG400026114,PGSC0003DMG400019432,PGSC0003DM…
GO:0050497	transferase activity, transferring alkylthio groups	molecular_function	0.037482	0.49021	4	2644	13	29181	PGSC0003DMG400007488,PGSC0003DMG400028406,PGSC0003DMG400021456,PGSC0003DMG400019719
GO:0050524	coenzyme-B sulfoethylthiotransferase activity	molecular_function	0.037482	0.49021	4	2644	13	29181	PGSC0003DMG400019719,PGSC0003DMG400007488,PGSC0003DMG400021456,PGSC0003DMG400028406
GO:0005742	mitochondrial outer membrane translocase complex	cellular_component	0.037639	0.49021	14	2644	92	29181	PGSC0003DMG400018823,PGSC0003DMG400033637,PGSC0003DMG400022358,PGSC0003DMG400007597,PGSC0003DMG400024615,PGSC0003DMG400013894,Novel03389,Novel01580,PGSC0003DMG400029967,PGSC0003DMG400030630,PGSC0003DMG400016015,PGSC0003DMG400029803,PGSC0003DMG400023130,PGSC0003DMG400025161
GO:0009254	peptidoglycan turnover	biological_process	0.037662	0.49021	2	2644	4	29181	PGSC0003DMG400002904,PGSC0003DMG400008673
GO:0008918	lipopolysaccharide 3-alpha-galactosyltransferase activity	molecular_function	0.038208	0.49469	4	2644	13	29181	PGSC0003DMG400008447,PGSC0003DMG400004253,PGSC0003DMG400012721,PGSC0003DMG400017516
GO:0035250	UDP-galactosyltransferase activity	molecular_function	0.038208	0.49469	4	2644	13	29181	PGSC0003DMG400012721,PGSC0003DMG400008447,PGSC0003DMG400004253,PGSC0003DMG400017516
GO:0030150	protein import into mitochondrial matrix	biological_process	0.038761	0.50053	8	2644	42	29181	PGSC0003DMG400024615,PGSC0003DMG400013894,PGSC0003DMG400007597,PGSC0003DMG400033637,PGSC0003DMG400029803,PGSC0003DMG400016015,PGSC0003DMG400030630,Novel01580
GO:0016887	ATPase activity	molecular_function	0.039366	0.50702	105	2644	891	29181	PGSC0003DMG400021265,PGSC0003DMG400019913,PGSC0003DMG400007791,PGSC0003DMG402002542,PGSC0003DMG400030560,PGSC0003DMG400007976,Novel00629,PGSC0003DMG400006622,PGSC0003DMG400022183,PGSC0003DMG400028422,PGSC0003DMG400003089,PGSC0003DMG400024981,PGSC0003DMG401031064,PGSC0003DMG400030968,PGSC0003DMG400011278,PGSC0003DMG400009040,PGSC0003DMG400017678,Novel01730,PGSC0003DMG400018259,PGSC0003DMG400021456…
GO:0005787	signal peptidase complex	cellular_component	0.039581	0.50714	9	2644	48	29181	PGSC0003DMG400015448,PGSC0003DMG400022139,PGSC0003DMG400031065,PGSC0003DMG400025078,PGSC0003DMG400028606,PGSC0003DMG400003537,PGSC0003DMG400019360,PGSC0003DMG400022200,Novel01882
GO:0006465	signal peptide processing	biological_process	0.039581	0.50714	9	2644	48	29181	PGSC0003DMG400022200,Novel01882,PGSC0003DMG400019360,PGSC0003DMG400028606,PGSC0003DMG400003537,PGSC0003DMG400031065,PGSC0003DMG400025078,PGSC0003DMG400015448,PGSC0003DMG400022139
GO:0005643	nuclear pore	cellular_component	0.04072	0.52037	9	2644	47	29181	PGSC0003DMG400030814,PGSC0003DMG400005662,PGSC0003DMG402003179,PGSC0003DMG400003122,PGSC0003DMG400020335,PGSC0003DMG400030405,PGSC0003DMG400010869,PGSC0003DMG400010444,PGSC0003DMG400012613
GO:0006739	NADP metabolic process	biological_process	0.041019	0.52283	6	2644	26	29181	Novel00931,PGSC0003DMG400001932,PGSC0003DMG400025121,PGSC0003DMG400005961,PGSC0003DMG400010485,PGSC0003DMG400030509
GO:0017022	myosin binding	molecular_function	0.041449	0.52667	2	2644	4	29181	Novel01960,PGSC0003DMG400003889
GO:0006633	fatty acid biosynthetic process	biological_process	0.041683	0.52667	23	2644	160	29181	PGSC0003DMG400025587,PGSC0003DMG400030422,PGSC0003DMG400029620,Novel01813,PGSC0003DMG400008551,PGSC0003DMG400029552,PGSC0003DMG400022750,PGSC0003DMG401017380,PGSC0003DMG400010415,PGSC0003DMG400026127,PGSC0003DMG400000139,PGSC0003DMG402023841,PGSC0003DMG400007373,PGSC0003DMG400033650,PGSC0003DMG400013443,PGSC0003DMG400004253,PGSC0003DMG400024204,PGSC0003DMG400010819,PGSC0003DMG400026494,PGSC0003DM…
GO:0016772	transferase activity, transferring phosphorus-containing groups	molecular_function	0.041704	0.52667	403	2644	3781	29181	PGSC0003DMG400013514,PGSC0003DMG400021322,PGSC0003DMG400024661,PGSC0003DMG400007462,PGSC0003DMG400033049,PGSC0003DMG400003805,PGSC0003DMG400001059,PGSC0003DMG400011251,PGSC0003DMG400027269,PGSC0003DMG400001965,PGSC0003DMG400009154,PGSC0003DMG400015488,PGSC0003DMG400021818,PGSC0003DMG400017151,PGSC0003DMG400027769,PGSC0003DMG400024575,PGSC0003DMG400006022,PGSC0003DMG400023608,PGSC0003DMG400017350,…
GO:0046434	organophosphate catabolic process	biological_process	0.041748	0.52667	10	2644	56	29181	PGSC0003DMG400030683,PGSC0003DMG400006965,PGSC0003DMG400012712,PGSC0003DMG400001752,PGSC0003DMG400020334,PGSC0003DMG400028904,PGSC0003DMG400006765,PGSC0003DMG400004800,PGSC0003DMG400011238,Novel00276
GO:0070069	cytochrome complex	cellular_component	0.042659	0.53678	14	2644	90	29181	PGSC0003DMG400000301,PGSC0003DMG400018535,PGSC0003DMG400005577,PGSC0003DMG400015276,PGSC0003DMG400016918,PGSC0003DMG400030941,PGSC0003DMG400025747,PGSC0003DMG400029087,PGSC0003DMG400014168,PGSC0003DMG400026342,PGSC0003DMG400008961,PGSC0003DMG400021686,PGSC0003DMG400029794,PGSC0003DMG400031365
GO:0044706	multi-multicellular organism process	biological_process	0.0429	0.53843	18	2644	109	29181	PGSC0003DMG400017331,PGSC0003DMG400001059,PGSC0003DMG400004930,PGSC0003DMG400011251,PGSC0003DMG400024998,PGSC0003DMG400022391,PGSC0003DMG400003313,PGSC0003DMG401028902,PGSC0003DMG400026154,Novel00172,PGSC0003DMG400013886,Novel01985,PGSC0003DMG400026155,PGSC0003DMG400013885,Novel01501,Novel00663,PGSC0003DMG400024260,PGSC0003DMG400017330
GO:0032182	ubiquitin-like protein binding	molecular_function	0.043301	0.54208	11	2644	64	29181	PGSC0003DMG400023590,PGSC0003DMG400028377,PGSC0003DMG400019587,PGSC0003DMG400001326,PGSC0003DMG400017516,PGSC0003DMG400017100,PGSC0003DMG400001719,PGSC0003DMG400030814,PGSC0003DMG402022117,PGSC0003DMG400001382,PGSC0003DMG400017753
GO:0008233	peptidase activity	molecular_function	0.043902	0.54822	198	2644	1848	29181	PGSC0003DMG400030840,PGSC0003DMG400005611,PGSC0003DMG400005748,PGSC0003DMG400010704,PGSC0003DMG400031065,PGSC0003DMG400006027,PGSC0003DMG400000139,PGSC0003DMG400006410,PGSC0003DMG400011347,PGSC0003DMG400004891,PGSC0003DMG400033335,PGSC0003DMG400011640,PGSC0003DMG400024802,PGSC0003DMG400003509,PGSC0003DMG400012034,PGSC0003DMG400014134,PGSC0003DMG400013108,PGSC0003DMG400028729,PGSC0003DMG400019130,…
GO:0044703	multi-organism reproductive process	biological_process	0.044096	0.54925	42	2644	330	29181	PGSC0003DMG400036493,PGSC0003DMG400008004,PGSC0003DMG400007581,PGSC0003DMG400005426,Novel01985,PGSC0003DMG400006160,PGSC0003DMG400026155,PGSC0003DMG400013885,PGSC0003DMG400030337,PGSC0003DMG400000723,Novel01501,PGSC0003DMG400020158,PGSC0003DMG400017330,PGSC0003DMG400024260,PGSC0003DMG400030902,PGSC0003DMG400017331,PGSC0003DMG400001059,PGSC0003DMG400024998,PGSC0003DMG400023923,PGSC0003DMG400011251…
GO:0003840	gamma-glutamyltransferase activity	molecular_function	0.044687	0.55469	3	2644	9	29181	PGSC0003DMG400000288,PGSC0003DMG400012813,PGSC0003DMG400030097
GO:0003941	L-serine ammonia-lyase activity	molecular_function	0.044897	0.55469	2	2644	4	29181	PGSC0003DMG400019719,PGSC0003DMG400030453
GO:0016841	ammonia-lyase activity	molecular_function	0.044897	0.55469	2	2644	4	29181	PGSC0003DMG400030453,PGSC0003DMG400019719
GO:0048646	anatomical structure formation involved in morphogenesis	biological_process	0.044984	0.55469	18	2644	126	29181	PGSC0003DMG400025866,PGSC0003DMG400027188,PGSC0003DMG400001433,PGSC0003DMG400025750,PGSC0003DMG400006088,PGSC0003DMG400012966,PGSC0003DMG400030474,PGSC0003DMG400006160,PGSC0003DMG400030918,PGSC0003DMG400008004,PGSC0003DMG400010999,PGSC0003DMG400015477,PGSC0003DMG400030902,PGSC0003DMG400022888,PGSC0003DMG400013924,PGSC0003DMG400000723,PGSC0003DMG400008956,PGSC0003DMG400027699
GO:0019882	antigen processing and presentation	biological_process	0.045314	0.5567	8	2644	43	29181	PGSC0003DMG400009529,PGSC0003DMG400013556,PGSC0003DMG400042273,PGSC0003DMG400020287,PGSC0003DMG400028393,PGSC0003DMG400002852,PGSC0003DMG400024300,PGSC0003DMG400010674
GO:0006022	aminoglycan metabolic process	biological_process	0.045373	0.5567	15	2644	100	29181	PGSC0003DMG400025063,PGSC0003DMG400002904,PGSC0003DMG400008673,PGSC0003DMG400001438,PGSC0003DMG400026855,PGSC0003DMG400033063,PGSC0003DMG400032789,PGSC0003DMG400017753,PGSC0003DMG400026853,PGSC0003DMG400001528,PGSC0003DMG400026854,PGSC0003DMG400025668,PGSC0003DMG400019446,PGSC0003DMG400005896,PGSC0003DMG400023326
GO:0022892	substrate-specific transporter activity	molecular_function	0.045656	0.55878	220	2644	2116	29181	PGSC0003DMG402000722,PGSC0003DMG400004439,PGSC0003DMG400000129,PGSC0003DMG400024904,PGSC0003DMG400015015,PGSC0003DMG400020649,PGSC0003DMG400007597,PGSC0003DMG400024998,PGSC0003DMG400014473,PGSC0003DMG402020132,Novel01055,PGSC0003DMG400009074,Novel02588,PGSC0003DMG400010794,PGSC0003DMG400017824,PGSC0003DMG400018792,PGSC0003DMG400000723,PGSC0003DMG400009154,PGSC0003DMG400030453,PGSC0003DMG400025523…
GO:0016684	oxidoreductase activity, acting on peroxide as acceptor	molecular_function	0.045968	0.5612	26	2644	201	29181	PGSC0003DMG400024967,PGSC0003DMG400019991,Novel02698,Novel01675,PGSC0003DMG400002848,PGSC0003DMG400025084,PGSC0003DMG400024754,PGSC0003DMG400003241,PGSC0003DMG400001774,PGSC0003DMG400014867,PGSC0003DMG400002190,PGSC0003DMG400001570,Novel03252,Novel02552,PGSC0003DMG400014168,PGSC0003DMG400020494,PGSC0003DMG400022103,PGSC0003DMG400011640,PGSC0003DMG401029613,PGSC0003DMG400015548,Novel02721,PGSC0003…
GO:0046488	phosphatidylinositol metabolic process	biological_process	0.046271	0.56279	32	2644	243	29181	PGSC0003DMG400021558,PGSC0003DMG400007965,PGSC0003DMG400023321,PGSC0003DMG400022026,PGSC0003DMG400022911,PGSC0003DMG400002291,PGSC0003DMG400009405,PGSC0003DMG400033029,PGSC0003DMG401031070,PGSC0003DMG400001580,PGSC0003DMG400022370,PGSC0003DMG400016649,Novel02831,PGSC0003DMG400008568,PGSC0003DMG400015749,PGSC0003DMG400019873,PGSC0003DMG401028367,PGSC0003DMG400001363,PGSC0003DMG400027269,PGSC0003DM…
GO:0003682	chromatin binding	molecular_function	0.046327	0.56279	16	2644	108	29181	PGSC0003DMG400006621,PGSC0003DMG400007199,PGSC0003DMG400008029,PGSC0003DMG400004285,PGSC0003DMG402018559,PGSC0003DMG400027269,PGSC0003DMG400006622,PGSC0003DMG400030000,PGSC0003DMG400025989,PGSC0003DMG400025897,PGSC0003DMG400010319,PGSC0003DMG400010246,PGSC0003DMG400009955,PGSC0003DMG400008434,PGSC0003DMG400030941,Novel01916
GO:0022843	voltage-gated cation channel activity	molecular_function	0.047979	0.5799	10	2644	60	29181	PGSC0003DMG402018143,PGSC0003DMG401004716,PGSC0003DMG400003993,PGSC0003DMG400008936,PGSC0003DMG400030373,PGSC0003DMG400005160,PGSC0003DMG400001780,PGSC0003DMG400023512,Novel01055,PGSC0003DMG401030861
GO:0030198	extracellular matrix organization	biological_process	0.04819	0.5799	5	2644	21	29181	PGSC0003DMG400002075,PGSC0003DMG400026565,PGSC0003DMG400006286,Novel01842,PGSC0003DMG400025627
GO:0043062	extracellular structure organization	biological_process	0.04819	0.5799	5	2644	21	29181	PGSC0003DMG400025627,PGSC0003DMG400026565,PGSC0003DMG400002075,PGSC0003DMG400006286,Novel01842
GO:0045149	acetoin metabolic process	biological_process	0.04858	0.5799	2	2644	4	29181	PGSC0003DMG400030814,PGSC0003DMG400000723
GO:0045151	acetoin biosynthetic process	biological_process	0.04858	0.5799	2	2644	4	29181	PGSC0003DMG400030814,PGSC0003DMG400000723
GO:0047605	acetolactate decarboxylase activity	molecular_function	0.04858	0.5799	2	2644	4	29181	PGSC0003DMG400030814,PGSC0003DMG400000723
GO:0004222	metalloendopeptidase activity	molecular_function	0.048646	0.5799	30	2644	227	29181	Novel01649,PGSC0003DMG400009900,PGSC0003DMG401014249,PGSC0003DMG400001122,PGSC0003DMG400024377,PGSC0003DMG400006312,PGSC0003DMG400006027,PGSC0003DMG400004818,PGSC0003DMG400007019,PGSC0003DMG400003122,PGSC0003DMG400001923,PGSC0003DMG400012910,PGSC0003DMG400005498,PGSC0003DMG400013108,PGSC0003DMG400028729,Novel01650,PGSC0003DMG400031793,PGSC0003DMG400007562,PGSC0003DMG400012340,PGSC0003DMG400027735…
GO:0046834	lipid phosphorylation	biological_process	0.049072	0.5799	5	2644	24	29181	PGSC0003DMG400022370,PGSC0003DMG400008568,PGSC0003DMG400030950,PGSC0003DMG400023321,PGSC0003DMG400013285
GO:0046854	phosphatidylinositol phosphorylation	biological_process	0.049072	0.5799	5	2644	24	29181	PGSC0003DMG400022370,PGSC0003DMG400008568,PGSC0003DMG400030950,PGSC0003DMG400023321,PGSC0003DMG400013285
GO:0005694	chromosome	cellular_component	0.049111	0.5799	84	2644	756	29181	PGSC0003DMG400006312,PGSC0003DMG400004374,PGSC0003DMG400008690,PGSC0003DMG400008434,Novel02473,PGSC0003DMG400001057,PGSC0003DMG402012803,PGSC0003DMG400022276,PGSC0003DMG400003422,PGSC0003DMG400016529,PGSC0003DMG400005494,PGSC0003DMG400018583,PGSC0003DMG400025384,PGSC0003DMG400030965,Novel01916,PGSC0003DMG400014222,PGSC0003DMG400030470,PGSC0003DMG400030432,PGSC0003DMG400002613,Novel01002,PGSC0003D…
GO:0006576	cellular biogenic amine metabolic process	biological_process	0.04915	0.5799	20	2644	138	29181	PGSC0003DMG400002613,PGSC0003DMG400010314,PGSC0003DMG400009401,PGSC0003DMG400007288,PGSC0003DMG401013112,PGSC0003DMG400002789,PGSC0003DMG400019449,PGSC0003DMG400025587,PGSC0003DMG400023115,PGSC0003DMG400025005,PGSC0003DMG400017824,PGSC0003DMG402007810,PGSC0003DMG401029631,PGSC0003DMG402002542,PGSC0003DMG400006594,PGSC0003DMG400002190,PGSC0003DMG400022183,PGSC0003DMG400028422,PGSC0003DMG400022268,…
GO:0044106	cellular amine metabolic process	biological_process	0.04915	0.5799	20	2644	138	29181	PGSC0003DMG400002613,PGSC0003DMG400009401,PGSC0003DMG400010314,PGSC0003DMG400007288,PGSC0003DMG401013112,PGSC0003DMG400002789,PGSC0003DMG400019449,PGSC0003DMG400025587,PGSC0003DMG400017824,PGSC0003DMG400023115,PGSC0003DMG400025005,PGSC0003DMG402007810,PGSC0003DMG401029631,PGSC0003DMG402002542,PGSC0003DMG400006594,PGSC0003DMG400002190,PGSC0003DMG400028422,PGSC0003DMG400022183,PGSC0003DMG400022268,…
GO:0008203	cholesterol metabolic process	biological_process	0.049433	0.58046	3	2644	9	29181	PGSC0003DMG400003792,PGSC0003DMG400030496,PGSC0003DMG400010076
GO:1902652	secondary alcohol metabolic process	biological_process	0.049433	0.58046	3	2644	9	29181	PGSC0003DMG400010076,PGSC0003DMG400030496,PGSC0003DMG400003792
GO:0042168	heme metabolic process	biological_process	0.0499	0.58454	14	2644	91	29181	Novel01240,PGSC0003DMG400023975,Novel03619,PGSC0003DMG400027156,PGSC0003DMG400023424,PGSC0003DMG400015678,Novel03103,PGSC0003DMG400022405,PGSC0003DMG402001978,PGSC0003DMG400004572,PGSC0003DMG400018665,PGSC0003DMG400002201,PGSC0003DMG402028101,PGSC0003DMG401021138
GO:0016989	sigma factor antagonist activity	molecular_function	0.050073	0.58518	2	2644	4	29181	PGSC0003DMG400016909,PGSC0003DMG400023462
GO:0007264	small GTPase mediated signal transduction	biological_process	0.050276	0.58615	38	2644	306	29181	PGSC0003DMG400017824,PGSC0003DMG400020828,PGSC0003DMG400012984,PGSC0003DMG400021039,PGSC0003DMG400007288,PGSC0003DMG400009401,PGSC0003DMG400029753,PGSC0003DMG400013514,PGSC0003DMG400015015,PGSC0003DMG400010612,PGSC0003DMG400019719,PGSC0003DMG400008659,PGSC0003DMG400006594,PGSC0003DMG400016607,Novel01614,PGSC0003DMG400023506,PGSC0003DMG400002703,PGSC0003DMG403024882,PGSC0003DMG401013112,PGSC0003DM…
GO:0022414	reproductive process	biological_process	0.050722	0.58996	46	2644	372	29181	PGSC0003DMG400004930,PGSC0003DMG400019991,PGSC0003DMG400021535,PGSC0003DMG400007199,PGSC0003DMG400006088,PGSC0003DMG400013886,PGSC0003DMG400021163,PGSC0003DMG400020622,PGSC0003DMG400008270,PGSC0003DMG400009650,PGSC0003DMG400030918,PGSC0003DMG400030496,PGSC0003DMG400002613,PGSC0003DMG400030474,Novel00663,PGSC0003DMG400023833,PGSC0003DMG400015575,PGSC0003DMG400017331,PGSC0003DMG400001059,PGSC0003DM…
GO:0044421	extracellular region part	cellular_component	0.051287	0.59375	50	2644	449	29181	PGSC0003DMG400002932,PGSC0003DMG400025117,PGSC0003DMG400014797,PGSC0003DMG400024226,PGSC0003DMG400027692,PGSC0003DMG400012434,PGSC0003DMG400016313,PGSC0003DMG400033685,PGSC0003DMG400001326,PGSC0003DMG400004007,PGSC0003DMG400014854,PGSC0003DMG400018823,PGSC0003DMG400047233,PGSC0003DMG400008692,PGSC0003DMG400023555,PGSC0003DMG400012910,PGSC0003DMG400013298,PGSC0003DMG400014236,PGSC0003DMG400008163,…
GO:0006650	glycerophospholipid metabolic process	biological_process	0.051295	0.59375	34	2644	261	29181	PGSC0003DMG400008568,PGSC0003DMG400015749,Novel02831,PGSC0003DMG400016649,PGSC0003DMG400022370,PGSC0003DMG400017627,PGSC0003DMG401031070,PGSC0003DMG400001580,PGSC0003DMG400033029,PGSC0003DMG400002291,PGSC0003DMG400022911,PGSC0003DMG400022026,PGSC0003DMG400009405,PGSC0003DMG400023321,PGSC0003DMG400007965,PGSC0003DMG400021558,PGSC0003DMG400005668,PGSC0003DMG400006410,PGSC0003DMG400003509,PGSC0003DM…
GO:0072330	monocarboxylic acid biosynthetic process	biological_process	0.05141	0.59375	25	2644	182	29181	PGSC0003DMG400026127,PGSC0003DMG400010415,PGSC0003DMG400000139,PGSC0003DMG401017380,PGSC0003DMG400008551,PGSC0003DMG400029552,PGSC0003DMG400002011,PGSC0003DMG400022750,PGSC0003DMG400025587,PGSC0003DMG400030422,PGSC0003DMG400029620,Novel01813,PGSC0003DMG400012522,PGSC0003DMG400019110,PGSC0003DMG400022225,PGSC0003DMG400024591,PGSC0003DMG400026494,PGSC0003DMG400012903,PGSC0003DMG400013443,PGSC0003DM…
GO:0046148	pigment biosynthetic process	biological_process	0.051626	0.59485	26	2644	190	29181	Novel03619,Novel01240,PGSC0003DMG400011238,PGSC0003DMG400026114,PGSC0003DMG400023424,Novel03103,PGSC0003DMG402028101,PGSC0003DMG400022026,PGSC0003DMG401021138,PGSC0003DMG400022405,PGSC0003DMG402001978,PGSC0003DMG400005886,PGSC0003DMG400029730,PGSC0003DMG400018665,PGSC0003DMG400023975,PGSC0003DMG400004608,PGSC0003DMG400026225,PGSC0003DMG400017020,Novel00910,PGSC0003DMG400027156,PGSC0003DMG40001490…
GO:0015103	inorganic anion transmembrane transporter activity	molecular_function	0.052097	0.59627	15	2644	92	29181	PGSC0003DMG400002730,PGSC0003DMG400008537,Novel02668,PGSC0003DMG400013282,PGSC0003DMG400021394,PGSC0003DMG400004318,PGSC0003DMG400007463,PGSC0003DMG400024904,PGSC0003DMG400031145,PGSC0003DMG400004253,PGSC0003DMG400029074,PGSC0003DMG402031322,PGSC0003DMG400018515,PGSC0003DMG400019315,PGSC0003DMG400022377
GO:0004879	RNA polymerase II transcription factor activity, ligand-activated sequence-specific DNA binding	molecular_function	0.052355	0.59627	4	2644	14	29181	PGSC0003DMG400000931,PGSC0003DMG400005956,PGSC0003DMG400011365,PGSC0003DMG400030551
GO:0004882	androgen receptor activity	molecular_function	0.052355	0.59627	4	2644	14	29181	PGSC0003DMG400000931,PGSC0003DMG400005956,PGSC0003DMG400011365,PGSC0003DMG400030551
GO:0030521	androgen receptor signaling pathway	biological_process	0.052355	0.59627	4	2644	14	29181	PGSC0003DMG400030551,PGSC0003DMG400011365,PGSC0003DMG400005956,PGSC0003DMG400000931
GO:0098531	transcription factor activity, direct ligand regulated sequence-specific DNA binding	molecular_function	0.052355	0.59627	4	2644	14	29181	PGSC0003DMG400011365,PGSC0003DMG400030551,PGSC0003DMG400000931,PGSC0003DMG400005956
GO:0008771	[citrate (pro-3S)-lyase] ligase activity	molecular_function	0.052567	0.5973	2	2644	4	29181	PGSC0003DMG400011721,PGSC0003DMG401012961
GO:0005342	organic acid transmembrane transporter activity	molecular_function	0.053016	0.59963	14	2644	91	29181	PGSC0003DMG400001410,PGSC0003DMG400021102,PGSC0003DMG400032226,PGSC0003DMG400030568,PGSC0003DMG400013282,PGSC0003DMG400007597,PGSC0003DMG400024998,PGSC0003DMG400002539,PGSC0003DMG400007784,PGSC0003DMG400012516,PGSC0003DMG400025523,PGSC0003DMG400009074,PGSC0003DMG400013886,PGSC0003DMG400032227
GO:0046943	carboxylic acid transmembrane transporter activity	molecular_function	0.053016	0.59963	14	2644	91	29181	PGSC0003DMG400001410,PGSC0003DMG400021102,PGSC0003DMG400030568,PGSC0003DMG400032226,PGSC0003DMG400007597,PGSC0003DMG400013282,PGSC0003DMG400024998,PGSC0003DMG400002539,PGSC0003DMG400012516,PGSC0003DMG400025523,PGSC0003DMG400007784,PGSC0003DMG400009074,PGSC0003DMG400013886,PGSC0003DMG400032227
GO:0008242	omega peptidase activity	molecular_function	0.054502	0.6133	6	2644	29	29181	PGSC0003DMG400026516,PGSC0003DMG400015252,PGSC0003DMG400019130,PGSC0003DMG400020866,PGSC0003DMG400017516,PGSC0003DMG400002327
GO:0004616	phosphogluconate dehydrogenase (decarboxylating) activity	molecular_function	0.054758	0.6133	11	2644	65	29181	PGSC0003DMG400001448,PGSC0003DMG400025121,PGSC0003DMG400031364,PGSC0003DMG400020334,PGSC0003DMG400001932,PGSC0003DMG400015678,PGSC0003DMG400023264,PGSC0003DMG400025137,PGSC0003DMG400009159,PGSC0003DMG400007573,PGSC0003DMG400030683
GO:0030029	actin filament-based process	biological_process	0.054793	0.6133	19	2644	132	29181	PGSC0003DMG400013816,PGSC0003DMG400003036,PGSC0003DMG402004570,PGSC0003DMG400001549,Novel01446,PGSC0003DMG400022318,PGSC0003DMG400026042,PGSC0003DMG401003156,PGSC0003DMG400002396,PGSC0003DMG400000376,PGSC0003DMG400001566,PGSC0003DMG400018800,PGSC0003DMG400007614,PGSC0003DMG402003179,PGSC0003DMG400009883,PGSC0003DMG400027769,PGSC0003DMG401012339,PGSC0003DMG400011768,PGSC0003DMG400022120
GO:0030036	actin cytoskeleton organization	biological_process	0.054793	0.6133	19	2644	132	29181	PGSC0003DMG400001566,PGSC0003DMG401003156,PGSC0003DMG400026042,PGSC0003DMG400000376,PGSC0003DMG400002396,PGSC0003DMG400022318,Novel01446,PGSC0003DMG400001549,PGSC0003DMG402004570,PGSC0003DMG400003036,PGSC0003DMG400013816,PGSC0003DMG400022120,PGSC0003DMG400011768,PGSC0003DMG401012339,PGSC0003DMG400027769,PGSC0003DMG400009883,PGSC0003DMG402003179,PGSC0003DMG400007614,PGSC0003DMG400018800
GO:0016407	acetyltransferase activity	molecular_function	0.054848	0.6133	27	2644	207	29181	PGSC0003DMG401026984,PGSC0003DMG400015213,PGSC0003DMG400014770,PGSC0003DMG400007288,PGSC0003DMG400016395,PGSC0003DMG400014379,PGSC0003DMG400014771,PGSC0003DMG400008956,PGSC0003DMG400032272,PGSC0003DMG400014776,PGSC0003DMG400000729,PGSC0003DMG400026128,PGSC0003DMG400004975,PGSC0003DMG400006777,PGSC0003DMG400026301,PGSC0003DMG400024511,PGSC0003DMG400019822,PGSC0003DMG400009219,PGSC0003DMG400012848,…
GO:0015698	inorganic anion transport	biological_process	0.055155	0.61533	20	2644	136	29181	PGSC0003DMG400008537,PGSC0003DMG400013282,PGSC0003DMG400021394,PGSC0003DMG400032825,PGSC0003DMG400029074,PGSC0003DMG400018515,PGSC0003DMG400002730,Novel02668,PGSC0003DMG400014134,PGSC0003DMG400026042,PGSC0003DMG400007463,PGSC0003DMG400004318,PGSC0003DMG400027381,PGSC0003DMG400024904,PGSC0003DMG400022677,PGSC0003DMG400031145,PGSC0003DMG400004253,PGSC0003DMG402031322,PGSC0003DMG400019315,PGSC0003DM…
GO:0005885	Arp2/3 protein complex	cellular_component	0.055548	0.61742	5	2644	24	29181	PGSC0003DMG400013816,PGSC0003DMG401012339,PGSC0003DMG400001549,PGSC0003DMG400026042,PGSC0003DMG402004570
GO:0016410	N-acyltransferase activity	molecular_function	0.055593	0.61742	24	2644	181	29181	PGSC0003DMG400012848,PGSC0003DMG400031145,PGSC0003DMG400008852,PGSC0003DMG400015229,PGSC0003DMG400014774,PGSC0003DMG400014772,PGSC0003DMG400008977,PGSC0003DMG400014778,PGSC0003DMG400006777,PGSC0003DMG400019822,PGSC0003DMG400026301,PGSC0003DMG400007288,PGSC0003DMG400016395,PGSC0003DMG400014771,PGSC0003DMG400008956,PGSC0003DMG400032272,PGSC0003DMG400014776,PGSC0003DMG400000729,PGSC0003DMG400004975,…
GO:0016049	cell growth	biological_process	0.05597	0.62021	6	2644	28	29181	PGSC0003DMG400000890,PGSC0003DMG400025627,PGSC0003DMG400006286,PGSC0003DMG400002075,PGSC0003DMG400026565,Novel01842
GO:0008813	chorismate lyase activity	molecular_function	0.057522	0.63499	2	2644	4	29181	PGSC0003DMG402003112,PGSC0003DMG400006871
GO:0006997	nucleus organization	biological_process	0.057621	0.63499	4	2644	18	29181	PGSC0003DMG400002613,PGSC0003DMG400030337,PGSC0003DMG400021163,PGSC0003DMG400013975
GO:0005783	endoplasmic reticulum	cellular_component	0.057692	0.63499	70	2644	631	29181	PGSC0003DMG400031065,PGSC0003DMG400024615,PGSC0003DMG400014847,PGSC0003DMG400002204,PGSC0003DMG400023359,Novel02599,PGSC0003DMG400015665,PGSC0003DMG400028606,PGSC0003DMG400002190,PGSC0003DMG400012034,PGSC0003DMG400001680,Novel01882,PGSC0003DMG400007462,PGSC0003DMG400043827,PGSC0003DMG400014173,PGSC0003DMG400013474,PGSC0003DMG400018250,PGSC0003DMG400003487,PGSC0003DMG400016649,PGSC0003DMG400022139…
GO:0098799	outer mitochondrial membrane protein complex	cellular_component	0.058437	0.64177	14	2644	98	29181	PGSC0003DMG400025161,PGSC0003DMG400023130,Novel01580,PGSC0003DMG400029967,PGSC0003DMG400030630,PGSC0003DMG400029803,PGSC0003DMG400016015,PGSC0003DMG400007597,Novel03389,PGSC0003DMG400024615,PGSC0003DMG400013894,PGSC0003DMG400022358,PGSC0003DMG400033637,PGSC0003DMG400018823
GO:0043232	intracellular non-membrane-bounded organelle	cellular_component	0.059986	0.65731	226	2644	2267	29181	PGSC0003DMG400000227,PGSC0003DMG400028145,PGSC0003DMG400007199,PGSC0003DMG400016313,PGSC0003DMG400001566,PGSC0003DMG400008091,PGSC0003DMG400028953,PGSC0003DMG400028162,PGSC0003DMG400001774,PGSC0003DMG400006639,PGSC0003DMG400028633,PGSC0003DMG400009823,PGSC0003DMG400024511,PGSC0003DMG400012451,PGSC0003DMG400004628,PGSC0003DMG400006622,PGSC0003DMG400007573,PGSC0003DMG400019835,PGSC0003DMG400009883,…
GO:0098798	mitochondrial protein complex	cellular_component	0.060516	0.66164	46	2644	397	29181	PGSC0003DMG400018535,PGSC0003DMG400016015,PGSC0003DMG401011681,Novel01580,PGSC0003DMG400020819,Novel03389,PGSC0003DMG400018763,PGSC0003DMG400002690,PGSC0003DMG400025035,PGSC0003DMG400026323,PGSC0003DMG400025747,PGSC0003DMG400030560,PGSC0003DMG400004449,PGSC0003DMG400023130,PGSC0003DMG400001656,PGSC0003DMG401017657,PGSC0003DMG400029803,PGSC0003DMG400028842,PGSC0003DMG400029967,PGSC0003DMG400030630…
GO:0033926	glycopeptide alpha-N-acetylgalactosaminidase activity	molecular_function	0.062563	0.6825	4	2644	15	29181	PGSC0003DMG400009257,PGSC0003DMG400030968,PGSC0003DMG400002756,PGSC0003DMG400026107
GO:0030030	cell projection organization	biological_process	0.063333	0.68938	23	2644	173	29181	PGSC0003DMG400022063,PGSC0003DMG400011036,PGSC0003DMG400016293,PGSC0003DMG400010097,PGSC0003DMG400023326,PGSC0003DMG400008437,PGSC0003DMG400000376,PGSC0003DMG400022225,PGSC0003DMG400001433,PGSC0003DMG400022888,PGSC0003DMG400002927,Novel00078,PGSC0003DMG400011541,PGSC0003DMG400027523,PGSC0003DMG400008956,PGSC0003DMG400014614,PGSC0003DMG400009094,PGSC0003DMG402030499,PGSC0003DMG400003756,PGSC0003DM…
GO:0003956	NAD(P)+-protein-arginine ADP-ribosyltransferase activity	molecular_function	0.063868	0.69334	2	2644	4	29181	Novel01511,PGSC0003DMG400011347
GO:0005198	structural molecule activity	molecular_function	0.063979	0.69334	192	2644	1919	29181	PGSC0003DMG400020470,PGSC0003DMG400028124,PGSC0003DMG400030082,PGSC0003DMG400028331,PGSC0003DMG400012238,PGSC0003DMG400027675,PGSC0003DMG400012966,PGSC0003DMG400016149,PGSC0003DMG400009956,PGSC0003DMG400019789,PGSC0003DMG400000433,Novel01717,PGSC0003DMG401023504,PGSC0003DMG400011840,PGSC0003DMG400027213,PGSC0003DMG400003291,PGSC0003DMG400020158,PGSC0003DMG400029237,PGSC0003DMG400006160,PGSC0003DM…
GO:0016298	lipase activity	molecular_function	0.064412	0.6965	12	2644	77	29181	PGSC0003DMG400011937,PGSC0003DMG400020264,PGSC0003DMG400006621,PGSC0003DMG400030496,Novel02921,PGSC0003DMG400025808,PGSC0003DMG400009025,PGSC0003DMG400022911,PGSC0003DMG400012602,PGSC0003DMG400001382,PGSC0003DMG400006622,PGSC0003DMG400028214
GO:0004579	dolichyl-diphosphooligosaccharide-protein glycotransferase activity	molecular_function	0.064996	0.69998	4	2644	18	29181	PGSC0003DMG400023340,PGSC0003DMG400027509,PGSC0003DMG400014847,PGSC0003DMG400025078
GO:0019838	growth factor binding	molecular_function	0.065019	0.69998	3	2644	10	29181	PGSC0003DMG400000890,Novel02061,PGSC0003DMG400022311
GO:0006081	cellular aldehyde metabolic process	biological_process	0.066086	0.70992	7	2644	40	29181	PGSC0003DMG400025121,PGSC0003DMG400001932,PGSC0003DMG400030509,PGSC0003DMG400005961,PGSC0003DMG400016535,PGSC0003DMG400014656,PGSC0003DMG400002201
GO:0044432	endoplasmic reticulum part	cellular_component	0.066628	0.71418	48	2644	418	29181	PGSC0003DMG402013278,PGSC0003DMG400003487,PGSC0003DMG400012124,PGSC0003DMG400016649,PGSC0003DMG400009180,PGSC0003DMG400022139,PGSC0003DMG400006663,PGSC0003DMG401014605,PGSC0003DMG400026074,PGSC0003DMG400004696,PGSC0003DMG400009454,PGSC0003DMG400026456,PGSC0003DMG400027509,PGSC0003DMG400003417,PGSC0003DMG400000092,PGSC0003DMG400024591,PGSC0003DMG400027080,PGSC0003DMG400022026,PGSC0003DMG400009405,…
GO:0004623	phospholipase A2 activity	molecular_function	0.067012	0.71494	2	2644	5	29181	Novel02921,PGSC0003DMG400012602
GO:0008108	UDP-glucose:hexose-1-phosphate uridylyltransferase activity	molecular_function	0.06711	0.71494	3	2644	10	29181	PGSC0003DMG400022276,PGSC0003DMG400017309,PGSC0003DMG400032510
GO:0046486	glycerolipid metabolic process	biological_process	0.067135	0.71494	35	2644	276	29181	PGSC0003DMG401018740,PGSC0003DMG400002204,PGSC0003DMG400013285,PGSC0003DMG400003509,PGSC0003DMG400006410,PGSC0003DMG400005668,PGSC0003DMG401028367,PGSC0003DMG400019873,PGSC0003DMG400027269,PGSC0003DMG400001363,PGSC0003DMG400004318,PGSC0003DMG400018670,PGSC0003DMG400030950,PGSC0003DMG400006021,PGSC0003DMG400005696,PGSC0003DMG400026516,PGSC0003DMG401003899,PGSC0003DMG400028124,PGSC0003DMG400016649,…
GO:0051321	meiotic cell cycle	biological_process	0.067308	0.71524	15	2644	102	29181	PGSC0003DMG400022164,PGSC0003DMG400022063,PGSC0003DMG400000227,PGSC0003DMG400011655,PGSC0003DMG400011195,PGSC0003DMG400015015,PGSC0003DMG400016441,PGSC0003DMG400009823,PGSC0003DMG400028633,PGSC0003DMG402012803,PGSC0003DMG400014010,PGSC0003DMG400000523,PGSC0003DMG400021911,PGSC0003DMG400014013,PGSC0003DMG400009822
GO:0012505	endomembrane system	cellular_component	0.06764	0.7157	115	2644	1070	29181	PGSC0003DMG400027080,Novel00545,PGSC0003DMG400022026,PGSC0003DMG400001382,PGSC0003DMG400000231,PGSC0003DMG400014324,PGSC0003DMG400010430,PGSC0003DMG400013481,PGSC0003DMG400010444,PGSC0003DMG400012206,PGSC0003DMG400016790,PGSC0003DMG400024081,PGSC0003DMG400024967,PGSC0003DMG400014854,PGSC0003DMG400001326,PGSC0003DMG400001632,PGSC0003DMG401014605,PGSC0003DMG400006663,PGSC0003DMG400000511,PGSC0003DM…
GO:0004176	ATP-dependent peptidase activity	molecular_function	0.067643	0.7157	3	2644	10	29181	Novel02003,Novel00189,PGSC0003DMG400014134
GO:0033692	cellular polysaccharide biosynthetic process	biological_process	0.06801	0.71805	23	2644	169	29181	PGSC0003DMG400029348,PGSC0003DMG402017902,PGSC0003DMG400010833,PGSC0003DMG400002292,PGSC0003DMG400029938,PGSC0003DMG401003156,PGSC0003DMG400002396,PGSC0003DMG400007965,PGSC0003DMG400015214,PGSC0003DMG400013443,PGSC0003DMG400004253,PGSC0003DMG400012852,PGSC0003DMG400027050,PGSC0003DMG400028538,PGSC0003DMG400010794,Novel03255,PGSC0003DMG400017516,PGSC0003DMG400003417,PGSC0003DMG400003067,PGSC0003DM…
GO:0022900	electron transport chain	biological_process	0.068528	0.72089	29	2644	236	29181	PGSC0003DMG400015276,PGSC0003DMG400016918,PGSC0003DMG400010231,PGSC0003DMG400024081,PGSC0003DMG400018535,PGSC0003DMG400001752,PGSC0003DMG400018635,PGSC0003DMG400020649,PGSC0003DMG400025035,PGSC0003DMG400002497,PGSC0003DMG400014010,PGSC0003DMG400015599,PGSC0003DMG400028214,PGSC0003DMG400002678,PGSC0003DMG400012451,PGSC0003DMG400010084,PGSC0003DMG400007552,PGSC0003DMG401033880,PGSC0003DMG400030439,…
GO:0007127	meiosis I	biological_process	0.068572	0.72089	12	2644	78	29181	PGSC0003DMG400000227,PGSC0003DMG400022063,PGSC0003DMG400011195,PGSC0003DMG400011655,PGSC0003DMG400016441,PGSC0003DMG400015015,PGSC0003DMG402012803,PGSC0003DMG400028633,PGSC0003DMG400009823,PGSC0003DMG400014010,PGSC0003DMG400009822,PGSC0003DMG400014013
GO:0008833	deoxyribonuclease IV (phage-T4-induced) activity	molecular_function	0.068788	0.72161	2	2644	5	29181	PGSC0003DMG400007945,PGSC0003DMG400000321
GO:0072348	sulfur compound transport	biological_process	0.069961	0.73236	7	2644	35	29181	PGSC0003DMG400014473,PGSC0003DMG400008537,PGSC0003DMG400016803,PGSC0003DMG400029074,PGSC0003DMG400021394,PGSC0003DMG400007463,PGSC0003DMG400019315
GO:0006879	cellular iron ion homeostasis	biological_process	0.070908	0.73912	6	2644	32	29181	PGSC0003DMG400016247,PGSC0003DMG401020908,PGSC0003DMG400008437,PGSC0003DMG400020906,PGSC0003DMG402020908,PGSC0003DMG400008358
GO:0055072	iron ion homeostasis	biological_process	0.070908	0.73912	6	2644	32	29181	PGSC0003DMG400008437,PGSC0003DMG400008358,PGSC0003DMG402020908,PGSC0003DMG400020906,PGSC0003DMG400016247,PGSC0003DMG401020908
GO:0071705	nitrogen compound transport	biological_process	0.071262	0.74043	49	2644	417	29181	PGSC0003DMG400028374,PGSC0003DMG400016649,PGSC0003DMG400008360,PGSC0003DMG400001067,PGSC0003DMG400009955,PGSC0003DMG400020266,PGSC0003DMG400017020,PGSC0003DMG400012569,PGSC0003DMG400025668,PGSC0003DMG400006447,PGSC0003DMG400002539,PGSC0003DMG400030405,PGSC0003DMG400010444,PGSC0003DMG400012613,PGSC0003DMG401015894,PGSC0003DMG400001410,PGSC0003DMG400023822,PGSC0003DMG400001508,PGSC0003DMG400009830,…
GO:0006575	cellular modified amino acid metabolic process	biological_process	0.071334	0.74043	22	2644	163	29181	PGSC0003DMG400023608,PGSC0003DMG400018793,PGSC0003DMG400004572,PGSC0003DMG400026456,PGSC0003DMG400030097,PGSC0003DMG400037250,PGSC0003DMG400012813,PGSC0003DMG400004374,PGSC0003DMG400023115,PGSC0003DMG400011038,PGSC0003DMG400000288,PGSC0003DMG400030121,PGSC0003DMG400002612,PGSC0003DMG400002011,PGSC0003DMG400006382,PGSC0003DMG400006021,PGSC0003DMG402028101,PGSC0003DMG400030219,PGSC0003DMG400028287,…
GO:0004629	phospholipase C activity	molecular_function	0.072524	0.75119	5	2644	25	29181	PGSC0003DMG400006621,PGSC0003DMG400028214,PGSC0003DMG400006622,PGSC0003DMG400020264,PGSC0003DMG400011937
GO:0031225	anchored component of membrane	cellular_component	0.072871	0.7532	6	2644	32	29181	PGSC0003DMG400025627,PGSC0003DMG400026565,PGSC0003DMG400002075,PGSC0003DMG400006286,PGSC0003DMG400030968,Novel01842
GO:0004797	thymidine kinase activity	molecular_function	0.073704	0.75703	7	2644	38	29181	PGSC0003DMG400020618,PGSC0003DMG400018535,PGSC0003DMG400023608,PGSC0003DMG400021818,PGSC0003DMG400015211,PGSC0003DMG400013779,PGSC0003DMG400003803
GO:0019136	deoxynucleoside kinase activity	molecular_function	0.073704	0.75703	7	2644	38	29181	PGSC0003DMG400021818,PGSC0003DMG400015211,PGSC0003DMG400013779,PGSC0003DMG400003803,PGSC0003DMG400020618,PGSC0003DMG400018535,PGSC0003DMG400023608
GO:0019206	nucleoside kinase activity	molecular_function	0.073704	0.75703	7	2644	38	29181	PGSC0003DMG400021818,PGSC0003DMG400003803,PGSC0003DMG400013779,PGSC0003DMG400015211,PGSC0003DMG400020618,PGSC0003DMG400023608,PGSC0003DMG400018535
GO:0015035	protein disulfide oxidoreductase activity	molecular_function	0.07401	0.75703	17	2644	141	29181	PGSC0003DMG400023359,PGSC0003DMG400031370,PGSC0003DMG400025255,PGSC0003DMG400015749,PGSC0003DMG400014627,PGSC0003DMG400011731,PGSC0003DMG402002164,PGSC0003DMG400021856,PGSC0003DMG400014322,PGSC0003DMG400016401,PGSC0003DMG400020080,PGSC0003DMG400003755,PGSC0003DMG400000521,PGSC0003DMG400002169,PGSC0003DMG400001410,PGSC0003DMG400007488,PGSC0003DMG400002167
GO:0015036	disulfide oxidoreductase activity	molecular_function	0.07401	0.75703	17	2644	141	29181	PGSC0003DMG400016401,PGSC0003DMG400014322,PGSC0003DMG400021856,PGSC0003DMG400003755,PGSC0003DMG400020080,PGSC0003DMG400002169,PGSC0003DMG400000521,PGSC0003DMG400002167,PGSC0003DMG400007488,PGSC0003DMG400001410,PGSC0003DMG400031370,PGSC0003DMG400023359,PGSC0003DMG400015749,PGSC0003DMG400025255,PGSC0003DMG400011731,PGSC0003DMG400014627,PGSC0003DMG402002164
GO:0019842	vitamin binding	molecular_function	0.07506	0.76617	15	2644	101	29181	PGSC0003DMG400006270,PGSC0003DMG400012578,PGSC0003DMG400024860,Novel00852,PGSC0003DMG401029222,PGSC0003DMG402008890,PGSC0003DMG401011372,PGSC0003DMG400032556,PGSC0003DMG400002921,PGSC0003DMG400002427,PGSC0003DMG401008890,PGSC0003DMG400014847,PGSC0003DMG400001100,PGSC0003DMG400013896,PGSC0003DMG402013561
GO:0042578	phosphoric ester hydrolase activity	molecular_function	0.076348	0.77323	67	2644	572	29181	PGSC0003DMG400009154,PGSC0003DMG400017824,PGSC0003DMG402016495,PGSC0003DMG400010439,PGSC0003DMG400009178,PGSC0003DMG400030418,PGSC0003DMG400009422,PGSC0003DMG400022221,PGSC0003DMG402014514,PGSC0003DMG400000421,PGSC0003DMG400027086,PGSC0003DMG400006621,PGSC0003DMG400017152,PGSC0003DMG400006594,PGSC0003DMG400020426,PGSC0003DMG400002696,PGSC0003DMG400029618,PGSC0003DMG400023506,PGSC0003DMG400009862,…
GO:0043412	macromolecule modification	biological_process	0.07642	0.77323	333	2644	3105	29181	PGSC0003DMG400031145,PGSC0003DMG400003958,PGSC0003DMG400017278,PGSC0003DMG402021564,PGSC0003DMG400015162,PGSC0003DMG401015433,PGSC0003DMG401028902,PGSC0003DMG400004860,Novel01446,PGSC0003DMG400020648,Novel01511,PGSC0003DMG400007819,PGSC0003DMG400011937,PGSC0003DMG400017330,PGSC0003DMG400004037,PGSC0003DMG400016168,PGSC0003DMG400013803,PGSC0003DMG400013885,PGSC0003DMG400016553,PGSC0003DMG401018740…
GO:0000030	mannosyltransferase activity	molecular_function	0.076535	0.77323	4	2644	18	29181	PGSC0003DMG400020351,PGSC0003DMG400021558,PGSC0003DMG400015211,PGSC0003DMG400017723
GO:0007286	spermatid development	biological_process	0.076577	0.77323	4	2644	19	29181	PGSC0003DMG400025750,PGSC0003DMG400002613,PGSC0003DMG400021163,PGSC0003DMG400030337
GO:0048515	spermatid differentiation	biological_process	0.076577	0.77323	4	2644	19	29181	PGSC0003DMG400002613,PGSC0003DMG400025750,PGSC0003DMG400030337,PGSC0003DMG400021163
GO:0005788	endoplasmic reticulum lumen	cellular_component	0.077057	0.77323	3	2644	10	29181	Novel02599,PGSC0003DMG402005074,PGSC0003DMG400026074
GO:0005875	microtubule associated complex	cellular_component	0.077451	0.77323	9	2644	58	29181	PGSC0003DMG400010999,PGSC0003DMG400019247,PGSC0003DMG401023504,PGSC0003DMG400002545,PGSC0003DMG400024462,PGSC0003DMG400015909,Novel03103,PGSC0003DMG400033063,PGSC0003DMG400020321
GO:0046916	cellular transition metal ion homeostasis	biological_process	0.077638	0.77323	6	2644	33	29181	PGSC0003DMG400020906,PGSC0003DMG402020908,PGSC0003DMG400008358,PGSC0003DMG400008437,PGSC0003DMG401020908,PGSC0003DMG400016247
GO:0019439	aromatic compound catabolic process	biological_process	0.077957	0.77323	33	2644	266	29181	PGSC0003DMG400025814,PGSC0003DMG400000376,PGSC0003DMG400001100,PGSC0003DMG400006709,PGSC0003DMG400022493,PGSC0003DMG401028570,PGSC0003DMG400033029,PGSC0003DMG400031845,Novel00283,PGSC0003DMG402023438,PGSC0003DMG400014560,PGSC0003DMG400008308,PGSC0003DMG400004629,PGSC0003DMG400027283,PGSC0003DMG400011038,PGSC0003DMG400023115,PGSC0003DMG400001976,PGSC0003DMG400007126,PGSC0003DMG400025813,PGSC0003DM…
GO:0018836	alkylmercury lyase activity	molecular_function	0.079033	0.77323	2	2644	5	29181	PGSC0003DMG400007070,PGSC0003DMG400014408
GO:0018941	organomercury metabolic process	biological_process	0.079033	0.77323	2	2644	5	29181	PGSC0003DMG400007070,PGSC0003DMG400014408
GO:0018942	organometal metabolic process	biological_process	0.079033	0.77323	2	2644	5	29181	PGSC0003DMG400014408,PGSC0003DMG400007070
GO:0046413	organomercury catabolic process	biological_process	0.079033	0.77323	2	2644	5	29181	PGSC0003DMG400007070,PGSC0003DMG400014408
GO:0071702	organic substance transport	biological_process	0.079174	0.77323	244	2644	2355	29181	PGSC0003DMG400011133,PGSC0003DMG400024967,PGSC0003DMG400001444,PGSC0003DMG400005163,PGSC0003DMG400028393,PGSC0003DMG400013714,PGSC0003DMG400014203,PGSC0003DMG400010444,PGSC0003DMG400025117,PGSC0003DMG400024142,PGSC0003DMG400013481,PGSC0003DMG400002291,PGSC0003DMG400012569,PGSC0003DMG401027116,PGSC0003DMG400030058,PGSC0003DMG400020266,PGSC0003DMG400004437,PGSC0003DMG400029518,PGSC0003DMG400030454,…
GO:0000735	removal of nonhomologous ends	biological_process	0.079366	0.77323	3	2644	12	29181	PGSC0003DMG400007199,PGSC0003DMG400023833,PGSC0003DMG400021676
GO:0000736	double-strand break repair via single-strand annealing, removal of nonhomologous ends	biological_process	0.079366	0.77323	3	2644	12	29181	PGSC0003DMG400021676,PGSC0003DMG400007199,PGSC0003DMG400023833
GO:0006312	mitotic recombination	biological_process	0.079366	0.77323	3	2644	12	29181	PGSC0003DMG400021676,PGSC0003DMG400023833,PGSC0003DMG400007199
GO:0007533	mating type switching	biological_process	0.079366	0.77323	3	2644	12	29181	PGSC0003DMG400021676,PGSC0003DMG400023833,PGSC0003DMG400007199
GO:0007534	gene conversion at mating-type locus	biological_process	0.079366	0.77323	3	2644	12	29181	PGSC0003DMG400021676,PGSC0003DMG400023833,PGSC0003DMG400007199
GO:0022413	reproductive process in single-celled organism	biological_process	0.079366	0.77323	3	2644	12	29181	PGSC0003DMG400021676,PGSC0003DMG400007199,PGSC0003DMG400023833
GO:0035822	gene conversion	biological_process	0.079366	0.77323	3	2644	12	29181	PGSC0003DMG400021676,PGSC0003DMG400023833,PGSC0003DMG400007199
GO:0045002	double-strand break repair via single-strand annealing	biological_process	0.079366	0.77323	3	2644	12	29181	PGSC0003DMG400021676,PGSC0003DMG400007199,PGSC0003DMG400023833
GO:0070336	flap-structured DNA binding	molecular_function	0.079366	0.77323	3	2644	12	29181	PGSC0003DMG400007199,PGSC0003DMG400023833,PGSC0003DMG400021676
GO:0006732	coenzyme metabolic process	biological_process	0.079677	0.77473	51	2644	430	29181	PGSC0003DMG400028287,Novel00931,Novel01240,PGSC0003DMG400019247,PGSC0003DMG400011044,PGSC0003DMG400022200,PGSC0003DMG400022268,PGSC0003DMG400010485,PGSC0003DMG401029222,PGSC0003DMG401011372,PGSC0003DMG400005246,PGSC0003DMG400006594,PGSC0003DMG402028101,PGSC0003DMG400023663,PGSC0003DMG400005961,PGSC0003DMG402018143,PGSC0003DMG400037250,PGSC0003DMG400011840,PGSC0003DMG400007614,PGSC0003DMG400001965…
GO:0009058	biosynthetic process	biological_process	0.080123	0.77752	839	2644	8649	29181	PGSC0003DMG400022985,PGSC0003DMG400018546,PGSC0003DMG400026516,PGSC0003DMG400022268,PGSC0003DMG400013177,PGSC0003DMG400019130,PGSC0003DMG400028729,PGSC0003DMG401021138,PGSC0003DMG400018665,PGSC0003DMG400001685,PGSC0003DMG400006410,PGSC0003DMG400037250,PGSC0003DMG400016891,PGSC0003DMG400026225,PGSC0003DMG400012154,PGSC0003DMG400002350,PGSC0003DMG400011932,PGSC0003DMG400018793,PGSC0003DMG400004659,…
GO:0004037	allantoicase activity	molecular_function	0.081789	0.79213	2	2644	6	29181	PGSC0003DMG400013879,PGSC0003DMG400010231
GO:0006505	GPI anchor metabolic process	biological_process	0.083187	0.80409	25	2644	192	29181	PGSC0003DMG401018740,PGSC0003DMG400016649,PGSC0003DMG400002204,Novel02831,PGSC0003DMG400003509,PGSC0003DMG400006410,PGSC0003DMG400015749,PGSC0003DMG400005668,PGSC0003DMG401028367,PGSC0003DMG400019873,PGSC0003DMG400021558,PGSC0003DMG400004318,PGSC0003DMG400001363,PGSC0003DMG400007965,PGSC0003DMG400018670,PGSC0003DMG400005696,PGSC0003DMG400022026,PGSC0003DMG400009405,PGSC0003DMG400002291,PGSC0003DM…
GO:0044723	single-organism carbohydrate metabolic process	biological_process	0.084773	0.81781	95	2644	852	29181	PGSC0003DMG400025384,PGSC0003DMG400016395,PGSC0003DMG400005494,PGSC0003DMG400003417,PGSC0003DMG400024627,PGSC0003DMG400001459,PGSC0003DMG400008472,PGSC0003DMG400026523,PGSC0003DMG400021347,PGSC0003DMG401014605,PGSC0003DMG400012910,PGSC0003DMG400026456,PGSC0003DMG400006391,PGSC0003DMG400017723,PGSC0003DMG400004253,Novel01261,PGSC0003DMG400005163,PGSC0003DMG400015214,PGSC0003DMG400026229,PGSC0003DM…
GO:0006493	protein O-linked glycosylation	biological_process	0.08557	0.82388	3	2644	12	29181	PGSC0003DMG400020351,PGSC0003DMG400017723,PGSC0003DMG400015211
GO:0004478	methionine adenosyltransferase activity	molecular_function	0.086081	0.82397	3	2644	10	29181	PGSC0003DMG400037250,PGSC0003DMG400028287,PGSC0003DMG400006382
GO:0006556	S-adenosylmethionine biosynthetic process	biological_process	0.086081	0.82397	3	2644	10	29181	PGSC0003DMG400037250,PGSC0003DMG400028287,PGSC0003DMG400006382
GO:0046500	S-adenosylmethionine metabolic process	biological_process	0.086081	0.82397	3	2644	10	29181	PGSC0003DMG400037250,PGSC0003DMG400028287,PGSC0003DMG400006382
GO:0008168	methyltransferase activity	molecular_function	0.08673	0.82856	94	2644	859	29181	PGSC0003DMG400019191,PGSC0003DMG400010097,PGSC0003DMG400030131,PGSC0003DMG400031262,PGSC0003DMG400000839,PGSC0003DMG400032503,PGSC0003DMG400020720,PGSC0003DMG400009591,PGSC0003DMG400010428,PGSC0003DMG400005668,PGSC0003DMG400003067,PGSC0003DMG400019267,PGSC0003DMG400007295,PGSC0003DMG400027769,PGSC0003DMG400018618,PGSC0003DMG400008710,PGSC0003DMG400002809,PGSC0003DMG400016412,PGSC0003DMG400002201,…
GO:0004857	enzyme inhibitor activity	molecular_function	0.087051	0.83002	55	2644	523	29181	PGSC0003DMG400001438,PGSC0003DMG400027052,PGSC0003DMG400002898,PGSC0003DMG400009177,PGSC0003DMG400001419,PGSC0003DMG402008889,PGSC0003DMG401019427,PGSC0003DMG400001373,PGSC0003DMG400000912,PGSC0003DMG400027771,PGSC0003DMG401013112,PGSC0003DMG400002074,PGSC0003DMG400011246,PGSC0003DMG400002703,PGSC0003DMG400010809,PGSC0003DMG401022117,PGSC0003DMG400014660,PGSC0003DMG400010388,PGSC0003DMG400030882,…
GO:0000270	peptidoglycan metabolic process	biological_process	0.088072	0.83814	5	2644	28	29181	PGSC0003DMG400033063,PGSC0003DMG400019446,PGSC0003DMG400002904,PGSC0003DMG400008673,PGSC0003DMG400025668
GO:0008378	galactosyltransferase activity	molecular_function	0.088275	0.83845	8	2644	46	29181	PGSC0003DMG400021307,PGSC0003DMG400000060,PGSC0003DMG400028961,PGSC0003DMG400012721,PGSC0003DMG400008447,PGSC0003DMG400004253,PGSC0003DMG400009066,PGSC0003DMG400017516
GO:0019082	viral protein processing	biological_process	0.088503	0.83899	4	2644	18	29181	PGSC0003DMG400011218,PGSC0003DMG404027324,PGSC0003DMG400027954,PGSC0003DMG400022368
GO:0009072	aromatic amino acid family metabolic process	biological_process	0.088924	0.84006	13	2644	88	29181	PGSC0003DMG400004643,PGSC0003DMG400030683,PGSC0003DMG400023608,PGSC0003DMG400007122,PGSC0003DMG400014543,PGSC0003DMG400025005,PGSC0003DMG400016478,PGSC0003DMG400020334,PGSC0003DMG400023115,PGSC0003DMG400024392,PGSC0003DMG400026536,PGSC0003DMG400013273,PGSC0003DMG400023957
GO:0006814	sodium ion transport	biological_process	0.088957	0.84006	17	2644	129	29181	PGSC0003DMG400027954,PGSC0003DMG400005668,PGSC0003DMG400011937,PGSC0003DMG400016505,PGSC0003DMG400021307,PGSC0003DMG400007359,PGSC0003DMG400013282,PGSC0003DMG400013474,PGSC0003DMG400033054,PGSC0003DMG402031322,PGSC0003DMG400012543,PGSC0003DMG400004753,PGSC0003DMG400030134,PGSC0003DMG400003340,PGSC0003DMG400027168,PGSC0003DMG401028367,PGSC0003DMG400025902
GO:0003942	N-acetyl-gamma-glutamyl-phosphate reductase activity	molecular_function	0.091129	0.85858	2	2644	5	29181	PGSC0003DMG400019677,PGSC0003DMG400006286
GO:0043752	adenosylcobinamide kinase activity	molecular_function	0.091268	0.85858	3	2644	12	29181	PGSC0003DMG400020294,PGSC0003DMG400012900,PGSC0003DMG400026132
GO:0005622	intracellular	cellular_component	0.091549	0.85959	831	2644	8670	29181	PGSC0003DMG400013434,PGSC0003DMG400009049,PGSC0003DMG400021394,PGSC0003DMG400011365,PGSC0003DMG400000173,PGSC0003DMG400030029,PGSC0003DMG400005668,PGSC0003DMG400030000,PGSC0003DMG400023359,PGSC0003DMG400015263,PGSC0003DMG400022405,PGSC0003DMG400021701,PGSC0003DMG400007597,PGSC0003DMG400019283,PGSC0003DMG400026982,PGSC0003DMG400015211,PGSC0003DMG400029797,PGSC0003DMG400001684,PGSC0003DMG400015015,…
GO:0004665	prephenate dehydrogenase (NADP+) activity	molecular_function	0.092157	0.86037	3	2644	11	29181	PGSC0003DMG400030683,PGSC0003DMG400020334,PGSC0003DMG400023957
GO:0006571	tyrosine biosynthetic process	biological_process	0.092157	0.86037	3	2644	11	29181	PGSC0003DMG400023957,PGSC0003DMG400030683,PGSC0003DMG400020334
GO:0008977	prephenate dehydrogenase activity	molecular_function	0.092157	0.86037	3	2644	11	29181	PGSC0003DMG400020334,PGSC0003DMG400030683,PGSC0003DMG400023957
GO:0042175	nuclear outer membrane-endoplasmic reticulum membrane network	cellular_component	0.09296	0.86503	46	2644	410	29181	PGSC0003DMG400002204,PGSC0003DMG400019274,PGSC0003DMG400015448,PGSC0003DMG400031065,PGSC0003DMG400024615,PGSC0003DMG401018740,PGSC0003DMG400005019,PGSC0003DMG400023359,PGSC0003DMG400001680,PGSC0003DMG400018670,PGSC0003DMG400012034,PGSC0003DMG400002190,PGSC0003DMG400002388,PGSC0003DMG400028606,PGSC0003DMG400003537,PGSC0003DMG400004442,PGSC0003DMG400025078,PGSC0003DMG400020383,PGSC0003DMG400013474,…
GO:0019080	viral gene expression	biological_process	0.093009	0.86503	13	2644	89	29181	PGSC0003DMG400022368,PGSC0003DMG402007406,PGSC0003DMG400011015,PGSC0003DMG400014166,PGSC0003DMG404027324,PGSC0003DMG400027954,PGSC0003DMG400004274,PGSC0003DMG400020364,PGSC0003DMG400015793,PGSC0003DMG400011218,PGSC0003DMG400010721,PGSC0003DMG400000468,PGSC0003DMG400028925
GO:0000271	polysaccharide biosynthetic process	biological_process	0.093737	0.86579	24	2644	186	29181	PGSC0003DMG400029938,PGSC0003DMG400002292,PGSC0003DMG400007965,PGSC0003DMG401003156,PGSC0003DMG400002396,PGSC0003DMG400010833,PGSC0003DMG402017902,PGSC0003DMG400001570,PGSC0003DMG400029348,PGSC0003DMG400004253,PGSC0003DMG400013443,PGSC0003DMG400012852,PGSC0003DMG400015214,PGSC0003DMG400028538,PGSC0003DMG400027050,PGSC0003DMG400012721,PGSC0003DMG400008447,PGSC0003DMG400009883,PGSC0003DMG400010794,…
GO:1901682	sulfur compound transmembrane transporter activity	molecular_function	0.094752	0.86579	6	2644	30	29181	PGSC0003DMG400029074,PGSC0003DMG400019315,PGSC0003DMG400021394,PGSC0003DMG400007463,PGSC0003DMG400008537,PGSC0003DMG400014473
GO:0004631	phosphomevalonate kinase activity	molecular_function	0.095244	0.86579	2	2644	6	29181	PGSC0003DMG400003792,PGSC0003DMG400010076
GO:0006695	cholesterol biosynthetic process	biological_process	0.095244	0.86579	2	2644	6	29181	PGSC0003DMG400003792,PGSC0003DMG400010076
GO:0016126	sterol biosynthetic process	biological_process	0.095244	0.86579	2	2644	6	29181	PGSC0003DMG400003792,PGSC0003DMG400010076
GO:1902653	secondary alcohol biosynthetic process	biological_process	0.095244	0.86579	2	2644	6	29181	PGSC0003DMG400010076,PGSC0003DMG400003792
GO:0016851	magnesium chelatase activity	molecular_function	0.095467	0.86579	3	2644	11	29181	PGSC0003DMG404026043,PGSC0003DMG400024802,PGSC0003DMG400032152
GO:0051002	ligase activity, forming nitrogen-metal bonds	molecular_function	0.095467	0.86579	3	2644	11	29181	PGSC0003DMG404026043,PGSC0003DMG400024802,PGSC0003DMG400032152
GO:0051003	ligase activity, forming nitrogen-metal bonds, forming coordination complexes	molecular_function	0.095467	0.86579	3	2644	11	29181	PGSC0003DMG400032152,PGSC0003DMG400024802,PGSC0003DMG404026043
GO:0019362	pyridine nucleotide metabolic process	biological_process	0.095484	0.86579	15	2644	106	29181	PGSC0003DMG400012910,PGSC0003DMG400028177,PGSC0003DMG402023631,PGSC0003DMG400025171,PGSC0003DMG400005961,PGSC0003DMG400030509,PGSC0003DMG400002690,PGSC0003DMG400001932,PGSC0003DMG400005494,Novel00931,PGSC0003DMG400010485,PGSC0003DMG400002675,PGSC0003DMG400019247,PGSC0003DMG400025121,PGSC0003DMG400011044
GO:0046496	nicotinamide nucleotide metabolic process	biological_process	0.095484	0.86579	15	2644	106	29181	PGSC0003DMG400010485,PGSC0003DMG400011044,PGSC0003DMG400019247,PGSC0003DMG400025121,PGSC0003DMG400002675,Novel00931,PGSC0003DMG400005494,PGSC0003DMG400030509,PGSC0003DMG400005961,PGSC0003DMG400025171,PGSC0003DMG400001932,PGSC0003DMG400002690,PGSC0003DMG400028177,PGSC0003DMG402023631,PGSC0003DMG400012910
GO:0033743	peptide-methionine (R)-S-oxide reductase activity	molecular_function	0.095557	0.86579	3	2644	14	29181	PGSC0003DMG400026323,PGSC0003DMG400007084,PGSC0003DMG400002190
GO:0008236	serine-type peptidase activity	molecular_function	0.09572	0.86579	62	2644	538	29181	PGSC0003DMG400007562,Novel02259,PGSC0003DMG400008831,PGSC0003DMG400029323,PGSC0003DMG400031811,PGSC0003DMG400028787,PGSC0003DMG400031845,PGSC0003DMG400006157,PGSC0003DMG400001247,PGSC0003DMG400027263,PGSC0003DMG400001525,PGSC0003DMG400001382,PGSC0003DMG400014515,PGSC0003DMG400022911,PGSC0003DMG400027954,PGSC0003DMG400015489,PGSC0003DMG400015575,PGSC0003DMG400004899,PGSC0003DMG400014594,PGSC0003DM…
GO:0017171	serine hydrolase activity	molecular_function	0.09572	0.86579	62	2644	538	29181	PGSC0003DMG400001382,PGSC0003DMG400014515,PGSC0003DMG400022911,PGSC0003DMG400001525,PGSC0003DMG400028787,PGSC0003DMG400008831,PGSC0003DMG400029323,PGSC0003DMG400031811,PGSC0003DMG400007562,Novel02259,PGSC0003DMG400027263,PGSC0003DMG400001247,PGSC0003DMG400006157,PGSC0003DMG400031845,PGSC0003DMG400004899,PGSC0003DMG400007137,PGSC0003DMG400021866,PGSC0003DMG400002613,PGSC0003DMG400014543,PGSC0003DM…
GO:0070085	glycosylation	biological_process	0.09573	0.86579	27	2644	210	29181	PGSC0003DMG400015211,Novel01511,PGSC0003DMG400026229,PGSC0003DMG402017902,PGSC0003DMG400009529,PGSC0003DMG400026323,PGSC0003DMG400027080,PGSC0003DMG400020351,PGSC0003DMG401030822,PGSC0003DMG400017723,PGSC0003DMG400031360,PGSC0003DMG400005667,PGSC0003DMG400003313,PGSC0003DMG400021785,PGSC0003DMG400014847,PGSC0003DMG400021307,PGSC0003DMG400023340,PGSC0003DMG400026456,PGSC0003DMG400021116,PGSC0003DM…
GO:0030976	thiamine pyrophosphate binding	molecular_function	0.095953	0.86622	7	2644	38	29181	PGSC0003DMG400032556,PGSC0003DMG400006270,PGSC0003DMG400024860,PGSC0003DMG400002921,Novel00852,PGSC0003DMG400001100,PGSC0003DMG402013561
GO:0051920	peroxiredoxin activity	molecular_function	0.096289	0.86766	4	2644	20	29181	PGSC0003DMG400003241,PGSC0003DMG400022103,PGSC0003DMG401029613,PGSC0003DMG400002190
GO:0000150	recombinase activity	molecular_function	0.096814	0.8707	6	2644	34	29181	PGSC0003DMG400013633,PGSC0003DMG400014442,PGSC0003DMG400018637,PGSC0003DMG400039508,PGSC0003DMG400029618,PGSC0003DMG400014010
GO:1990542	mitochondrial transmembrane transport	biological_process	0.097305	0.8707	9	2644	59	29181	PGSC0003DMG400029803,PGSC0003DMG400016015,Novel01580,PGSC0003DMG400030630,PGSC0003DMG400024615,PGSC0003DMG400013894,Novel03389,PGSC0003DMG400007597,PGSC0003DMG400033637
GO:0005789	endoplasmic reticulum membrane	cellular_component	0.097426	0.8707	45	2644	402	29181	PGSC0003DMG400004696,PGSC0003DMG400026456,PGSC0003DMG400009454,PGSC0003DMG400022139,PGSC0003DMG400006663,PGSC0003DMG401014605,PGSC0003DMG400003487,PGSC0003DMG400012124,PGSC0003DMG400009180,PGSC0003DMG400016649,PGSC0003DMG402013278,PGSC0003DMG400000092,PGSC0003DMG400003417,PGSC0003DMG400027509,PGSC0003DMG400001924,PGSC0003DMG400027080,PGSC0003DMG400009405,PGSC0003DMG400022026,PGSC0003DMG400024591,…
GO:0005737	cytoplasm	cellular_component	0.097463	0.8707	428	2644	4387	29181	PGSC0003DMG400005749,PGSC0003DMG400014379,PGSC0003DMG400029237,PGSC0003DMG400027213,PGSC0003DMG400021787,PGSC0003DMG400011731,PGSC0003DMG400008000,PGSC0003DMG400014614,Novel00909,PGSC0003DMG400005019,PGSC0003DMG400023340,PGSC0003DMG400027182,PGSC0003DMG400030941,PGSC0003DMG400023428,PGSC0003DMG402031322,PGSC0003DMG400026393,PGSC0003DMG400006896,PGSC0003DMG400027675,PGSC0003DMG400012616,PGSC0003DM…
GO:0009186	deoxyribonucleoside diphosphate metabolic process	biological_process	0.097511	0.8707	3	2644	12	29181	PGSC0003DMG400027315,PGSC0003DMG400020253,Novel00282
GO:0009496	plastoquinol--plastocyanin reductase activity	molecular_function	0.098968	0.8777	3	2644	12	29181	PGSC0003DMG400020426,PGSC0003DMG400003702,PGSC0003DMG400008447
GO:0052880	oxidoreductase activity, acting on diphenols and related substances as donors, with copper protein as acceptor	molecular_function	0.098968	0.8777	3	2644	12	29181	PGSC0003DMG400008447,PGSC0003DMG400003702,PGSC0003DMG400020426
GO:0004097	catechol oxidase activity	molecular_function	0.099152	0.8777	5	2644	25	29181	PGSC0003DMG400018916,PGSC0003DMG400018914,PGSC0003DMG400029575,PGSC0003DMG400000464,PGSC0003DMG400029576
GO:0044424	intracellular part	cellular_component	0.099216	0.8777	809	2644	8445	29181	PGSC0003DMG400025835,PGSC0003DMG400024591,PGSC0003DMG400022500,PGSC0003DMG400001774,PGSC0003DMG400028633,PGSC0003DMG400005641,PGSC0003DMG400011687,PGSC0003DMG400030514,PGSC0003DMG400018535,PGSC0003DMG400016015,PGSC0003DMG400020338,PGSC0003DMG400028127,PGSC0003DMG400027099,PGSC0003DMG400026342,PGSC0003DMG400008211,PGSC0003DMG401012339,PGSC0003DMG400004696,PGSC0003DMG400018250,PGSC0003DMG400021373,…
GO:0044087	regulation of cellular component biogenesis	biological_process	0.099473	0.8777	13	2644	92	29181	PGSC0003DMG400026042,PGSC0003DMG400013345,PGSC0003DMG400000376,PGSC0003DMG400031813,PGSC0003DMG401012339,PGSC0003DMG400022318,Novel01446,PGSC0003DMG400001549,PGSC0003DMG400002927,PGSC0003DMG400009883,Novel00078,PGSC0003DMG402004570,PGSC0003DMG400013816
GO:0006066	alcohol metabolic process	biological_process	0.099882	0.8777	12	2644	80	29181	PGSC0003DMG400035836,PGSC0003DMG400001976,PGSC0003DMG400030496,PGSC0003DMG400010415,PGSC0003DMG400016878,PGSC0003DMG400009219,PGSC0003DMG400026225,PGSC0003DMG400003792,PGSC0003DMG402015686,PGSC0003DMG400012634,PGSC0003DMG402014514,PGSC0003DMG400010076
GO:0030545	receptor regulator activity	molecular_function	0.10011	0.8777	5	2644	28	29181	PGSC0003DMG400010578,PGSC0003DMG400012434,PGSC0003DMG400004972,PGSC0003DMG400001438,PGSC0003DMG400021322
GO:0030547	receptor inhibitor activity	molecular_function	0.10011	0.8777	5	2644	28	29181	PGSC0003DMG400001438,PGSC0003DMG400021322,PGSC0003DMG400004972,PGSC0003DMG400012434,PGSC0003DMG400010578
GO:0030548	acetylcholine receptor regulator activity	molecular_function	0.10011	0.8777	5	2644	28	29181	PGSC0003DMG400004972,PGSC0003DMG400012434,PGSC0003DMG400001438,PGSC0003DMG400021322,PGSC0003DMG400010578
GO:0030550	acetylcholine receptor inhibitor activity	molecular_function	0.10011	0.8777	5	2644	28	29181	PGSC0003DMG400010578,PGSC0003DMG400012434,PGSC0003DMG400004972,PGSC0003DMG400001438,PGSC0003DMG400021322
GO:0030312	external encapsulating structure	cellular_component	0.10066	0.8777	36	2644	321	29181	PGSC0003DMG400031816,PGSC0003DMG400031262,PGSC0003DMG400012966,PGSC0003DMG400010177,PGSC0003DMG400014024,PGSC0003DMG400028675,PGSC0003DMG400027188,PGSC0003DMG400012997,PGSC0003DMG400002085,PGSC0003DMG400013975,PGSC0003DMG400030902,PGSC0003DMG400017298,PGSC0003DMG400000723,PGSC0003DMG401009709,PGSC0003DMG401018740,PGSC0003DMG400002545,PGSC0003DMG400003866,PGSC0003DMG400015933,PGSC0003DMG400006160,…
GO:0016741	transferase activity, transferring one-carbon groups	molecular_function	0.10068	0.8777	97	2644	895	29181	PGSC0003DMG400003889,PGSC0003DMG400025902,PGSC0003DMG400008591,Novel01713,PGSC0003DMG400009822,PGSC0003DMG400018937,PGSC0003DMG400002932,PGSC0003DMG400000560,PGSC0003DMG400017221,PGSC0003DMG400031473,PGSC0003DMG400013779,PGSC0003DMG400024934,PGSC0003DMG400006955,PGSC0003DMG400011266,PGSC0003DMG400012564,PGSC0003DMG400012593,PGSC0003DMG400013856,PGSC0003DMG400026074,PGSC0003DMG400026456,PGSC0003DM…
GO:0045454	cell redox homeostasis	biological_process	0.10082	0.8777	23	2644	202	29181	PGSC0003DMG400014627,PGSC0003DMG400021685,PGSC0003DMG400011731,PGSC0003DMG400026074,PGSC0003DMG402002164,PGSC0003DMG400031370,PGSC0003DMG400024095,PGSC0003DMG400004608,PGSC0003DMG400023359,PGSC0003DMG400025255,PGSC0003DMG400027156,PGSC0003DMG400002169,PGSC0003DMG400002167,PGSC0003DMG400007488,PGSC0003DMG400001410,PGSC0003DMG400009956,PGSC0003DMG400002777,PGSC0003DMG400021856,PGSC0003DMG400016401,…
GO:0008312	7S RNA binding	molecular_function	0.10098	0.8777	7	2644	41	29181	PGSC0003DMG400027769,PGSC0003DMG400015575,PGSC0003DMG400012133,PGSC0003DMG400013494,PGSC0003DMG400021787,PGSC0003DMG400021785,PGSC0003DMG400005163
GO:0048500	signal recognition particle	cellular_component	0.10098	0.8777	7	2644	41	29181	PGSC0003DMG400005163,PGSC0003DMG400021785,PGSC0003DMG400021787,PGSC0003DMG400013494,PGSC0003DMG400012133,PGSC0003DMG400015575,PGSC0003DMG400027769
GO:0042600	chorion	cellular_component	0.1012	0.8777	8	2644	51	29181	PGSC0003DMG400000723,PGSC0003DMG400030902,PGSC0003DMG400006088,PGSC0003DMG400012966,PGSC0003DMG400006160,PGSC0003DMG400030918,PGSC0003DMG400008004,PGSC0003DMG400030474
GO:0006119	oxidative phosphorylation	biological_process	0.10153	0.8777	14	2644	103	29181	Novel02377,PGSC0003DMG400002497,PGSC0003DMG400029087,PGSC0003DMG400030941,PGSC0003DMG400010084,PGSC0003DMG400018150,PGSC0003DMG400021686,PGSC0003DMG400026342,PGSC0003DMG400016918,PGSC0003DMG400015276,PGSC0003DMG401033880,PGSC0003DMG400018635,PGSC0003DMG400007913,PGSC0003DMG400018535
GO:0042773	ATP synthesis coupled electron transport	biological_process	0.10153	0.8777	14	2644	103	29181	PGSC0003DMG400016918,PGSC0003DMG400015276,PGSC0003DMG401033880,PGSC0003DMG400018635,PGSC0003DMG400018535,PGSC0003DMG400007913,Novel02377,PGSC0003DMG400002497,PGSC0003DMG400029087,PGSC0003DMG400010084,PGSC0003DMG400030941,PGSC0003DMG400021686,PGSC0003DMG400018150,PGSC0003DMG400026342
GO:0007126	meiotic nuclear division	biological_process	0.10186	0.8777	13	2644	92	29181	PGSC0003DMG400015015,PGSC0003DMG400016441,PGSC0003DMG400011655,PGSC0003DMG400011195,PGSC0003DMG400022063,PGSC0003DMG400000227,PGSC0003DMG400022164,PGSC0003DMG400014013,PGSC0003DMG400009822,PGSC0003DMG400014010,PGSC0003DMG400009823,PGSC0003DMG400028633,PGSC0003DMG402012803
GO:1903046	meiotic cell cycle process	biological_process	0.10186	0.8777	13	2644	92	29181	PGSC0003DMG402012803,PGSC0003DMG400009823,PGSC0003DMG400028633,PGSC0003DMG400009822,PGSC0003DMG400014013,PGSC0003DMG400014010,PGSC0003DMG400000227,PGSC0003DMG400022063,PGSC0003DMG400022164,PGSC0003DMG400016441,PGSC0003DMG400015015,PGSC0003DMG400011195,PGSC0003DMG400011655
GO:0021549	cerebellum development	biological_process	0.10314	0.88407	1	2644	2	29181	PGSC0003DMG400020133
GO:0022037	metencephalon development	biological_process	0.10314	0.88407	1	2644	2	29181	PGSC0003DMG400020133
GO:0030902	hindbrain development	biological_process	0.10314	0.88407	1	2644	2	29181	PGSC0003DMG400020133
GO:0006582	melanin metabolic process	biological_process	0.10362	0.88665	2	2644	6	29181	PGSC0003DMG400029730,PGSC0003DMG400028234
GO:0043066	negative regulation of apoptotic process	biological_process	0.10425	0.88737	8	2644	52	29181	PGSC0003DMG400000421,PGSC0003DMG400002789,PGSC0003DMG400001752,PGSC0003DMG400027699,PGSC0003DMG400030839,PGSC0003DMG400008000,PGSC0003DMG402030499,PGSC0003DMG400027269
GO:0043069	negative regulation of programmed cell death	biological_process	0.10425	0.88737	8	2644	52	29181	PGSC0003DMG400000421,PGSC0003DMG400002789,PGSC0003DMG400001752,PGSC0003DMG400027699,PGSC0003DMG400008000,PGSC0003DMG402030499,PGSC0003DMG400027269,PGSC0003DMG400030839
GO:0060548	negative regulation of cell death	biological_process	0.10425	0.88737	8	2644	52	29181	PGSC0003DMG400002789,PGSC0003DMG400027699,PGSC0003DMG400001752,PGSC0003DMG400000421,PGSC0003DMG400030839,PGSC0003DMG402030499,PGSC0003DMG400027269,PGSC0003DMG400008000
GO:0017134	fibroblast growth factor binding	molecular_function	0.10449	0.88791	2	2644	6	29181	Novel02061,PGSC0003DMG400022311
GO:0004733	pyridoxamine-phosphate oxidase activity	molecular_function	0.10501	0.89017	3	2644	13	29181	PGSC0003DMG400001525,PGSC0003DMG400007008,PGSC0003DMG400010999
GO:0042221	response to chemical	biological_process	0.10512	0.89017	79	2644	759	29181	PGSC0003DMG400030630,PGSC0003DMG400029803,PGSC0003DMG400006506,PGSC0003DMG400014442,Novel02018,PGSC0003DMG400027283,PGSC0003DMG400004474,PGSC0003DMG400001438,Novel01970,PGSC0003DMG400004899,PGSC0003DMG400021563,PGSC0003DMG400006391,PGSC0003DMG400029931,PGSC0003DMG400003531,PGSC0003DMG400008579,PGSC0003DMG400030229,PGSC0003DMG402003112,PGSC0003DMG400015607,PGSC0003DMG400006378,PGSC0003DMG400007070…
GO:0005635	nuclear envelope	cellular_component	0.10565	0.89199	10	2644	67	29181	PGSC0003DMG400030814,PGSC0003DMG400005662,PGSC0003DMG402003179,PGSC0003DMG400013975,PGSC0003DMG400003122,PGSC0003DMG400020335,PGSC0003DMG400030405,PGSC0003DMG400010869,PGSC0003DMG400012613,PGSC0003DMG400010444
GO:0006542	glutamine biosynthetic process	biological_process	0.10622	0.89199	4	2644	18	29181	PGSC0003DMG400013235,PGSC0003DMG400012997,PGSC0003DMG400010485,PGSC0003DMG400014592
GO:0000279	M phase	biological_process	0.10624	0.89199	9	2644	62	29181	PGSC0003DMG400018509,PGSC0003DMG400022063,PGSC0003DMG400000227,PGSC0003DMG400011655,PGSC0003DMG400015015,PGSC0003DMG400016441,PGSC0003DMG400000248,PGSC0003DMG400028633,PGSC0003DMG400009422
GO:0022403	cell cycle phase	biological_process	0.10624	0.89199	9	2644	62	29181	PGSC0003DMG400015015,PGSC0003DMG400000248,PGSC0003DMG400016441,PGSC0003DMG400011655,PGSC0003DMG400022063,PGSC0003DMG400000227,PGSC0003DMG400018509,PGSC0003DMG400009422,PGSC0003DMG400028633
GO:0044848	biological phase	biological_process	0.10624	0.89199	9	2644	62	29181	PGSC0003DMG400009422,PGSC0003DMG400028633,PGSC0003DMG400022063,PGSC0003DMG400000227,PGSC0003DMG400018509,PGSC0003DMG400015015,PGSC0003DMG400016441,PGSC0003DMG400000248,PGSC0003DMG400011655
GO:0032269	negative regulation of cellular protein metabolic process	biological_process	0.10688	0.89304	14	2644	103	29181	PGSC0003DMG400022507,PGSC0003DMG400008000,PGSC0003DMG400001854,PGSC0003DMG400006815,PGSC0003DMG400030551,PGSC0003DMG400027269,PGSC0003DMG400018119,PGSC0003DMG400007819,PGSC0003DMG400005577,PGSC0003DMG400008945,PGSC0003DMG400001326,PGSC0003DMG400015575,PGSC0003DMG400027771,PGSC0003DMG400014854
GO:0051248	negative regulation of protein metabolic process	biological_process	0.10688	0.89304	14	2644	103	29181	PGSC0003DMG400006815,PGSC0003DMG400030551,PGSC0003DMG400008000,PGSC0003DMG400001854,PGSC0003DMG400027269,PGSC0003DMG400022507,PGSC0003DMG400001326,PGSC0003DMG400014854,PGSC0003DMG400027771,PGSC0003DMG400015575,PGSC0003DMG400007819,PGSC0003DMG400005577,PGSC0003DMG400008945,PGSC0003DMG400018119
GO:0036128	CatSper complex	cellular_component	0.10691	0.89304	2	2644	6	29181	PGSC0003DMG401009709,PGSC0003DMG400018131
GO:0002764	immune response-regulating signaling pathway	biological_process	0.10762	0.89741	5	2644	27	29181	PGSC0003DMG400000421,PGSC0003DMG400027086,PGSC0003DMG400009900,PGSC0003DMG400011246,PGSC0003DMG400027590
GO:0006790	sulfur compound metabolic process	biological_process	0.10892	0.90674	28	2644	222	29181	PGSC0003DMG400012813,PGSC0003DMG400004374,PGSC0003DMG400037250,PGSC0003DMG400023506,PGSC0003DMG400000288,PGSC0003DMG400014379,PGSC0003DMG400011167,PGSC0003DMG400017151,PGSC0003DMG400028925,PGSC0003DMG400030097,PGSC0003DMG400016553,PGSC0003DMG400028732,PGSC0003DMG400016168,PGSC0003DMG400033921,PGSC0003DMG400028127,PGSC0003DMG400013514,PGSC0003DMG400028287,PGSC0003DMG400010674,PGSC0003DMG400003089,…
GO:0006520	cellular amino acid metabolic process	biological_process	0.10968	0.91102	90	2644	808	29181	PGSC0003DMG400006140,PGSC0003DMG400021441,PGSC0003DMG400015909,PGSC0003DMG400004911,PGSC0003DMG400000404,PGSC0003DMG400028102,PGSC0003DMG400013779,PGSC0003DMG400006955,PGSC0003DMG400004800,PGSC0003DMG400021507,PGSC0003DMG400027014,PGSC0003DMG400027735,PGSC0003DMG400017627,PGSC0003DMG400006396,PGSC0003DMG400021866,PGSC0003DMG400023850,PGSC0003DMG400015379,PGSC0003DMG400004660,PGSC0003DMG400021143,…
GO:0031400	negative regulation of protein modification process	biological_process	0.10992	0.91102	8	2644	51	29181	PGSC0003DMG400006815,PGSC0003DMG400022507,PGSC0003DMG400001326,PGSC0003DMG400015575,PGSC0003DMG400014854,PGSC0003DMG400027771,PGSC0003DMG400018119,PGSC0003DMG400007819
GO:0071949	FAD binding	molecular_function	0.10999	0.91102	14	2644	98	29181	PGSC0003DMG400014901,PGSC0003DMG400027156,PGSC0003DMG400011238,Novel03619,Novel00910,PGSC0003DMG400022618,PGSC0003DMG400004608,PGSC0003DMG400026225,PGSC0003DMG400005886,PGSC0003DMG400018665,PGSC0003DMG402001978,PGSC0003DMG400022026,PGSC0003DMG400025098,PGSC0003DMG401024074
GO:0010181	FMN binding	molecular_function	0.11076	0.91475	11	2644	79	29181	PGSC0003DMG400030890,PGSC0003DMG402018777,PGSC0003DMG400013779,PGSC0003DMG400007008,PGSC0003DMG400002567,PGSC0003DMG400010999,PGSC0003DMG400007462,PGSC0003DMG400001326,PGSC0003DMG400001525,PGSC0003DMG400013879,PGSC0003DMG400004828
GO:0016878	acid-thiol ligase activity	molecular_function	0.11081	0.91475	3	2644	12	29181	PGSC0003DMG401012961,PGSC0003DMG400011721,PGSC0003DMG400012903
GO:0006541	glutamine metabolic process	biological_process	0.11109	0.9155	7	2644	41	29181	PGSC0003DMG400010674,PGSC0003DMG400014592,PGSC0003DMG400013235,PGSC0003DMG400026382,PGSC0003DMG400012997,PGSC0003DMG400007227,PGSC0003DMG400010485
GO:0046870	cadmium ion binding	molecular_function	0.11143	0.91678	4	2644	19	29181	PGSC0003DMG400025628,PGSC0003DMG400008437,PGSC0003DMG400025808,PGSC0003DMG400002539
GO:0044781	bacterial-type flagellum organization	biological_process	0.11169	0.91738	9	2644	61	29181	PGSC0003DMG400023326,PGSC0003DMG400002927,Novel00078,PGSC0003DMG400022063,PGSC0003DMG400006588,PGSC0003DMG400006871,PGSC0003DMG400014614,PGSC0003DMG400008437,PGSC0003DMG400000376
GO:0090066	regulation of anatomical structure size	biological_process	0.11218	0.91903	13	2644	93	29181	PGSC0003DMG400001549,PGSC0003DMG402004570,PGSC0003DMG400009883,PGSC0003DMG400013816,PGSC0003DMG400032778,PGSC0003DMG400013579,PGSC0003DMG400026042,PGSC0003DMG400032789,PGSC0003DMG400014168,PGSC0003DMG401012339,Novel01446,PGSC0003DMG400012550,PGSC0003DMG400022318
GO:0004601	peroxidase activity	molecular_function	0.11226	0.91903	22	2644	182	29181	PGSC0003DMG400024967,Novel01675,PGSC0003DMG400019991,Novel02698,PGSC0003DMG400002848,PGSC0003DMG400024754,PGSC0003DMG400025084,PGSC0003DMG400001774,PGSC0003DMG400014867,PGSC0003DMG400014168,Novel02552,PGSC0003DMG400001570,Novel03252,PGSC0003DMG400020494,PGSC0003DMG400011640,Novel02721,PGSC0003DMG400015548,PGSC0003DMG400014055,PGSC0003DMG400032147,PGSC0003DMG400000511,PGSC0003DMG400026281,PGSC0003…
GO:0009200	deoxyribonucleoside triphosphate metabolic process	biological_process	0.11299	0.92036	3	2644	12	29181	PGSC0003DMG400008676,PGSC0003DMG400022200,PGSC0003DMG400022502
GO:0009211	pyrimidine deoxyribonucleoside triphosphate metabolic process	biological_process	0.11299	0.92036	3	2644	12	29181	PGSC0003DMG400022502,PGSC0003DMG400022200,PGSC0003DMG400008676
GO:0046080	dUTP metabolic process	biological_process	0.11299	0.92036	3	2644	12	29181	PGSC0003DMG400008676,PGSC0003DMG400022200,PGSC0003DMG400022502
GO:0005246	calcium channel regulator activity	molecular_function	0.11352	0.92315	10	2644	68	29181	PGSC0003DMG400026393,PGSC0003DMG400014173,PGSC0003DMG400030882,PGSC0003DMG400014627,PGSC0003DMG402008889,Novel01511,PGSC0003DMG400026304,PGSC0003DMG400022639,PGSC0003DMG400024511,PGSC0003DMG400001419
GO:0005743	mitochondrial inner membrane	cellular_component	0.11394	0.92509	46	2644	416	29181	PGSC0003DMG400029794,PGSC0003DMG400030701,PGSC0003DMG400008270,PGSC0003DMG400029087,PGSC0003DMG400011578,PGSC0003DMG400008961,PGSC0003DMG400021686,PGSC0003DMG400031755,PGSC0003DMG400026342,PGSC0003DMG401017657,PGSC0003DMG400001656,PGSC0003DMG400004449,PGSC0003DMG400012640,PGSC0003DMG400030439,PGSC0003DMG400031832,PGSC0003DMG400028842,PGSC0003DMG400025035,PGSC0003DMG400002690,PGSC0003DMG400018763,…
GO:0019901	protein kinase binding	molecular_function	0.11485	0.92997	8	2644	50	29181	PGSC0003DMG400015015,PGSC0003DMG400003701,PGSC0003DMG400016441,PGSC0003DMG400016790,PGSC0003DMG400022063,PGSC0003DMG401025510,Novel01257,PGSC0003DMG400009051
GO:0043086	negative regulation of catalytic activity	biological_process	0.11521	0.92997	13	2644	97	29181	PGSC0003DMG400012451,PGSC0003DMG400022507,PGSC0003DMG400026356,PGSC0003DMG400027269,PGSC0003DMG400006815,PGSC0003DMG400008000,PGSC0003DMG400007819,PGSC0003DMG400018119,PGSC0003DMG400027771,PGSC0003DMG400002612,PGSC0003DMG400014854,PGSC0003DMG400015575,PGSC0003DMG400001326
GO:0044092	negative regulation of molecular function	biological_process	0.11521	0.92997	13	2644	97	29181	PGSC0003DMG400018119,PGSC0003DMG400007819,PGSC0003DMG400015575,PGSC0003DMG400014854,PGSC0003DMG400002612,PGSC0003DMG400027771,PGSC0003DMG400001326,PGSC0003DMG400012451,PGSC0003DMG400026356,PGSC0003DMG400022507,PGSC0003DMG400027269,PGSC0003DMG400008000,PGSC0003DMG400006815
GO:0019637	organophosphate metabolic process	biological_process	0.11541	0.92997	132	2644	1255	29181	PGSC0003DMG400026225,PGSC0003DMG400003509,PGSC0003DMG400000301,PGSC0003DMG400006410,PGSC0003DMG400007913,PGSC0003DMG400027590,PGSC0003DMG400008751,PGSC0003DMG400016535,PGSC0003DMG400002204,PGSC0003DMG400002201,PGSC0003DMG400026516,PGSC0003DMG400016918,PGSC0003DMG400022268,PGSC0003DMG400002852,PGSC0003DMG400019247,PGSC0003DMG400011238,PGSC0003DMG400023464,PGSC0003DMG400022502,PGSC0003DMG400004318,…
GO:0005758	mitochondrial intermembrane space	cellular_component	0.11623	0.92997	3	2644	14	29181	PGSC0003DMG400015263,PGSC0003DMG400025038,PGSC0003DMG400012418
GO:0016530	metallochaperone activity	molecular_function	0.11623	0.92997	3	2644	14	29181	PGSC0003DMG400012418,PGSC0003DMG400015263,PGSC0003DMG400025038
GO:0016531	copper chaperone activity	molecular_function	0.11623	0.92997	3	2644	14	29181	PGSC0003DMG400015263,PGSC0003DMG400025038,PGSC0003DMG400012418
GO:0031970	organelle envelope lumen	cellular_component	0.11623	0.92997	3	2644	14	29181	PGSC0003DMG400025038,PGSC0003DMG400015263,PGSC0003DMG400012418
GO:0005751	mitochondrial respiratory chain complex IV	cellular_component	0.11656	0.92997	3	2644	13	29181	PGSC0003DMG400029794,PGSC0003DMG400025747,PGSC0003DMG400008961
GO:0045277	respiratory chain complex IV	cellular_component	0.11656	0.92997	3	2644	13	29181	PGSC0003DMG400025747,PGSC0003DMG400008961,PGSC0003DMG400029794
GO:0043566	structure-specific DNA binding	molecular_function	0.11662	0.92997	28	2644	226	29181	PGSC0003DMG400015340,PGSC0003DMG400020426,PGSC0003DMG402003586,PGSC0003DMG400021331,PGSC0003DMG401021929,PGSC0003DMG401029631,PGSC0003DMG400027539,PGSC0003DMG400001461,PGSC0003DMG400020720,PGSC0003DMG400006621,PGSC0003DMG400028145,PGSC0003DMG400007199,PGSC0003DMG400004340,PGSC0003DMG400021676,PGSC0003DMG402018530,PGSC0003DMG400007874,PGSC0003DMG400028925,PGSC0003DMG400018453,PGSC0003DMG400018430,…
GO:0004673	protein histidine kinase activity	molecular_function	0.11777	0.93607	20	2644	159	29181	PGSC0003DMG400024909,PGSC0003DMG400027065,PGSC0003DMG400000227,PGSC0003DMG400031250,PGSC0003DMG402020263,PGSC0003DMG401031064,PGSC0003DMG400030219,PGSC0003DMG400026982,PGSC0003DMG400028213,PGSC0003DMG400014183,PGSC0003DMG400011246,PGSC0003DMG400014442,PGSC0003DMG400003574,PGSC0003DMG400017824,PGSC0003DMG400027954,PGSC0003DMG400027699,PGSC0003DMG400001854,PGSC0003DMG400000415,PGSC0003DMG400029941,…
GO:0016775	phosphotransferase activity, nitrogenous group as acceptor	molecular_function	0.11777	0.93607	20	2644	159	29181	PGSC0003DMG400000227,PGSC0003DMG400024909,PGSC0003DMG400027065,PGSC0003DMG401031064,PGSC0003DMG402020263,PGSC0003DMG400031250,PGSC0003DMG400030219,PGSC0003DMG400026982,PGSC0003DMG400028213,PGSC0003DMG400014442,PGSC0003DMG400003574,PGSC0003DMG400014183,PGSC0003DMG400011246,PGSC0003DMG400027699,PGSC0003DMG400017824,PGSC0003DMG400027954,PGSC0003DMG400000415,PGSC0003DMG400001854,PGSC0003DMG400029941,…
GO:0003855	3-dehydroquinate dehydratase activity	molecular_function	0.11839	0.93946	4	2644	19	29181	Novel00276,PGSC0003DMG400022568,PGSC0003DMG400005284,PGSC0003DMG400012802
GO:1901576	organic substance biosynthetic process	biological_process	0.1188	0.94123	802	2644	8310	29181	Novel03619,PGSC0003DMG400021895,PGSC0003DMG400034101,PGSC0003DMG400031071,PGSC0003DMG400006991,PGSC0003DMG400022225,PGSC0003DMG400030428,PGSC0003DMG400002396,PGSC0003DMG400017439,PGSC0003DMG400023663,PGSC0003DMG400029938,Novel01511,PGSC0003DMG401007403,PGSC0003DMG400006190,PGSC0003DMG400007150,PGSC0003DMG400019333,PGSC0003DMG400008447,PGSC0003DMG400009477,PGSC0003DMG400005162,PGSC0003DMG400019274…
GO:0008882	[glutamate-ammonia-ligase] adenylyltransferase activity	molecular_function	0.11998	0.949	2	2644	7	29181	PGSC0003DMG400011015,PGSC0003DMG400029288
GO:0070569	uridylyltransferase activity	molecular_function	0.1208	0.95117	4	2644	19	29181	PGSC0003DMG400007626,PGSC0003DMG400032510,PGSC0003DMG400017309,PGSC0003DMG400022276
GO:0006298	mismatch repair	biological_process	0.12102	0.95117	11	2644	78	29181	PGSC0003DMG400021331,PGSC0003DMG402003586,PGSC0003DMG400000077,PGSC0003DMG400016159,PGSC0003DMG400001461,PGSC0003DMG401017380,PGSC0003DMG400015340,PGSC0003DMG400007462,PGSC0003DMG400016054,PGSC0003DMG400028145,PGSC0003DMG400004340
GO:0009056	catabolic process	biological_process	0.1216	0.95117	148	2644	1447	29181	PGSC0003DMG400017494,PGSC0003DMG400006965,PGSC0003DMG400021128,PGSC0003DMG400019347,Novel00276,PGSC0003DMG400020158,PGSC0003DMG401023504,PGSC0003DMG401029613,PGSC0003DMG400008673,PGSC0003DMG400012997,PGSC0003DMG400028214,PGSC0003DMG400005144,PGSC0003DMG400011044,PGSC0003DMG400044116,PGSC0003DMG400028904,PGSC0003DMG400022276,PGSC0003DMG400030715,PGSC0003DMG400001752,PGSC0003DMG400028124,PGSC0003DM…
GO:0005242	inward rectifier potassium channel activity	molecular_function	0.12162	0.95117	2	2644	7	29181	Novel01055,PGSC0003DMG400003993
GO:0000502	proteasome complex	cellular_component	0.12206	0.95117	13	2644	97	29181	PGSC0003DMG400004609,PGSC0003DMG400015462,PGSC0003DMG401021929,PGSC0003DMG400020441,PGSC0003DMG400002904,PGSC0003DMG400009650,PGSC0003DMG400022569,PGSC0003DMG400000330,PGSC0003DMG400022748,PGSC0003DMG400028729,PGSC0003DMG400021163,PGSC0003DMG402019187,PGSC0003DMG400022391
GO:0009405	pathogenesis	biological_process	0.12244	0.95117	88	2644	826	29181	PGSC0003DMG400010704,Novel01126,PGSC0003DMG400014627,PGSC0003DMG400009460,PGSC0003DMG400009178,PGSC0003DMG400010229,PGSC0003DMG400000037,PGSC0003DMG400004009,PGSC0003DMG400013894,PGSC0003DMG400024998,PGSC0003DMG400026016,PGSC0003DMG400007783,PGSC0003DMG400013975,PGSC0003DMG400004996,PGSC0003DMG400025161,PGSC0003DMG400032195,PGSC0003DMG401010218,PGSC0003DMG400028119,PGSC0003DMG400021322,PGSC0003DM…
GO:0005768	endosome	cellular_component	0.12267	0.95117	5	2644	27	29181	PGSC0003DMG400001326,PGSC0003DMG400008000,PGSC0003DMG400027269,PGSC0003DMG400007819,PGSC0003DMG400001382
GO:0044440	endosomal part	cellular_component	0.12267	0.95117	5	2644	27	29181	PGSC0003DMG400007819,PGSC0003DMG400001382,PGSC0003DMG400001326,PGSC0003DMG400008000,PGSC0003DMG400027269
GO:0004751	ribose-5-phosphate isomerase activity	molecular_function	0.12273	0.95117	2	2644	7	29181	PGSC0003DMG400005961,PGSC0003DMG400030509
GO:0009052	pentose-phosphate shunt, non-oxidative branch	biological_process	0.12273	0.95117	2	2644	7	29181	PGSC0003DMG400030509,PGSC0003DMG400005961
GO:0030021	extracellular matrix structural constituent conferring compression resistance	molecular_function	0.12274	0.95117	2	2644	8	29181	PGSC0003DMG400018583,PGSC0003DMG400010092
GO:0030345	structural constituent of tooth enamel	molecular_function	0.12274	0.95117	2	2644	8	29181	PGSC0003DMG400018583,PGSC0003DMG400010092
GO:0030258	lipid modification	biological_process	0.12276	0.95117	16	2644	117	29181	PGSC0003DMG400005667,PGSC0003DMG400022370,PGSC0003DMG400021785,PGSC0003DMG400031360,PGSC0003DMG400026323,PGSC0003DMG400009529,PGSC0003DMG400030950,PGSC0003DMG401030822,PGSC0003DMG400004828,PGSC0003DMG400023321,PGSC0003DMG400016193,PGSC0003DMG400008568,PGSC0003DMG400013285,PGSC0003DMG400016121,PGSC0003DMG400021116,PGSC0003DMG400021347
GO:0003707	steroid hormone receptor activity	molecular_function	0.12395	0.95704	6	2644	34	29181	PGSC0003DMG400011365,PGSC0003DMG400030551,PGSC0003DMG400000931,PGSC0003DMG400030840,PGSC0003DMG400004899,PGSC0003DMG400005956
GO:1901661	quinone metabolic process	biological_process	0.1241	0.95704	6	2644	35	29181	PGSC0003DMG400007613,PGSC0003DMG400029794,PGSC0003DMG400006871,PGSC0003DMG402003112,PGSC0003DMG400025792,PGSC0003DMG400007614
GO:1901663	quinone biosynthetic process	biological_process	0.1241	0.95704	6	2644	35	29181	PGSC0003DMG402003112,PGSC0003DMG400006871,PGSC0003DMG400007614,PGSC0003DMG400025792,PGSC0003DMG400007613,PGSC0003DMG400029794
GO:0016805	dipeptidase activity	molecular_function	0.12443	0.95806	4	2644	20	29181	PGSC0003DMG401026984,PGSC0003DMG402008996,PGSC0003DMG400012997,PGSC0003DMG400030082
GO:0016573	histone acetylation	biological_process	0.12565	0.9636	4	2644	22	29181	PGSC0003DMG400026382,PGSC0003DMG400015213,PGSC0003DMG400031145,PGSC0003DMG400012286
GO:0015658	branched-chain amino acid transmembrane transporter activity	molecular_function	0.1265	0.9636	2	2644	8	29181	PGSC0003DMG400002539,PGSC0003DMG400025523
GO:0015803	branched-chain amino acid transport	biological_process	0.1265	0.9636	2	2644	8	29181	PGSC0003DMG400025523,PGSC0003DMG400002539
GO:0016830	carbon-carbon lyase activity	molecular_function	0.12675	0.9636	35	2644	301	29181	PGSC0003DMG401027186,PGSC0003DMG400021307,PGSC0003DMG402008890,PGSC0003DMG400006871,PGSC0003DMG400007019,PGSC0003DMG400002612,PGSC0003DMG400011937,PGSC0003DMG400013331,PGSC0003DMG400024278,PGSC0003DMG400000723,PGSC0003DMG400012571,PGSC0003DMG400002190,PGSC0003DMG400021264,PGSC0003DMG400003340,PGSC0003DMG402031322,PGSC0003DMG400015015,PGSC0003DMG400030814,PGSC0003DMG400013474,PGSC0003DMG400029050,…
GO:0010565	regulation of cellular ketone metabolic process	biological_process	0.12681	0.9636	2	2644	6	29181	PGSC0003DMG400004922,PGSC0003DMG400014134
GO:0019216	regulation of lipid metabolic process	biological_process	0.12681	0.9636	2	2644	6	29181	PGSC0003DMG400014134,PGSC0003DMG400004922
GO:0019217	regulation of fatty acid metabolic process	biological_process	0.12681	0.9636	2	2644	6	29181	PGSC0003DMG400004922,PGSC0003DMG400014134
GO:0002200	somatic diversification of immune receptors	biological_process	0.12757	0.9636	2	2644	6	29181	PGSC0003DMG403020240,PGSC0003DMG400017100
GO:0002562	somatic diversification of immune receptors via germline recombination within a single locus	biological_process	0.12757	0.9636	2	2644	6	29181	PGSC0003DMG400017100,PGSC0003DMG403020240
GO:0016444	somatic cell DNA recombination	biological_process	0.12757	0.9636	2	2644	6	29181	PGSC0003DMG400017100,PGSC0003DMG403020240
GO:0033151	V(D)J recombination	biological_process	0.12757	0.9636	2	2644	6	29181	PGSC0003DMG400017100,PGSC0003DMG403020240
GO:0045444	fat cell differentiation	biological_process	0.12817	0.9636	4	2644	23	29181	PGSC0003DMG400012176,PGSC0003DMG400006022,PGSC0003DMG400004442,PGSC0003DMG400001632
GO:0007129	synapsis	biological_process	0.12856	0.9636	6	2644	35	29181	PGSC0003DMG400011655,PGSC0003DMG400015015,PGSC0003DMG400016441,PGSC0003DMG400028633,PGSC0003DMG400022063,PGSC0003DMG400000227
GO:0007130	synaptonemal complex assembly	biological_process	0.12856	0.9636	6	2644	35	29181	PGSC0003DMG400015015,PGSC0003DMG400016441,PGSC0003DMG400011655,PGSC0003DMG400022063,PGSC0003DMG400000227,PGSC0003DMG400028633
GO:0045143	homologous chromosome segregation	biological_process	0.12856	0.9636	6	2644	35	29181	PGSC0003DMG400000227,PGSC0003DMG400022063,PGSC0003DMG400028633,PGSC0003DMG400016441,PGSC0003DMG400015015,PGSC0003DMG400011655
GO:0070192	chromosome organization involved in meiosis	biological_process	0.12856	0.9636	6	2644	35	29181	PGSC0003DMG400028633,PGSC0003DMG400000227,PGSC0003DMG400022063,PGSC0003DMG400011655,PGSC0003DMG400016441,PGSC0003DMG400015015
GO:0070193	synaptonemal complex organization	biological_process	0.12856	0.9636	6	2644	35	29181	PGSC0003DMG400011655,PGSC0003DMG400015015,PGSC0003DMG400016441,PGSC0003DMG400028633,PGSC0003DMG400022063,PGSC0003DMG400000227
GO:0005506	iron ion binding	molecular_function	0.12894	0.9636	81	2644	756	29181	PGSC0003DMG402012803,PGSC0003DMG400018876,PGSC0003DMG400003289,PGSC0003DMG400024643,PGSC0003DMG402030469,PGSC0003DMG400005276,PGSC0003DMG400030941,PGSC0003DMG400016247,PGSC0003DMG400046813,PGSC0003DMG400014238,PGSC0003DMG400030413,PGSC0003DMG400014108,PGSC0003DMG400001976,PGSC0003DMG400022225,PGSC0003DMG400019320,PGSC0003DMG400021157,PGSC0003DMG400033650,Novel02153,PGSC0003DMG402023841,PGSC0003DM…
GO:0008914	leucyltransferase activity	molecular_function	0.12896	0.9636	2	2644	6	29181	PGSC0003DMG400005144,PGSC0003DMG400030715
GO:0009219	pyrimidine deoxyribonucleotide metabolic process	biological_process	0.12919	0.9636	7	2644	46	29181	PGSC0003DMG400003803,PGSC0003DMG400022502,PGSC0003DMG400021818,PGSC0003DMG400022200,PGSC0003DMG400002932,PGSC0003DMG400008676,PGSC0003DMG400020618
GO:0016485	protein processing	biological_process	0.12946	0.9636	16	2644	125	29181	PGSC0003DMG400020287,PGSC0003DMG400025078,PGSC0003DMG400003537,PGSC0003DMG400028606,PGSC0003DMG400019360,PGSC0003DMG400022200,Novel01882,PGSC0003DMG400022139,PGSC0003DMG400015448,PGSC0003DMG400011218,PGSC0003DMG400031065,PGSC0003DMG404027324,PGSC0003DMG400024627,PGSC0003DMG400027954,PGSC0003DMG400022368,PGSC0003DMG400008356
GO:0051604	protein maturation	biological_process	0.12946	0.9636	16	2644	125	29181	PGSC0003DMG400031065,PGSC0003DMG400011218,PGSC0003DMG400022139,PGSC0003DMG400015448,PGSC0003DMG400022368,PGSC0003DMG400008356,PGSC0003DMG400024627,PGSC0003DMG404027324,PGSC0003DMG400027954,PGSC0003DMG400003537,PGSC0003DMG400028606,PGSC0003DMG400020287,PGSC0003DMG400025078,PGSC0003DMG400022200,Novel01882,PGSC0003DMG400019360
GO:0000228	nuclear chromosome	cellular_component	0.12968	0.96376	39	2644	347	29181	PGSC0003DMG400015015,PGSC0003DMG400022276,PGSC0003DMG400004439,PGSC0003DMG400016529,PGSC0003DMG400020426,PGSC0003DMG400021701,PGSC0003DMG400021331,PGSC0003DMG400001965,PGSC0003DMG400011655,PGSC0003DMG400004374,PGSC0003DMG401023644,PGSC0003DMG400001057,PGSC0003DMG401024899,PGSC0003DMG400024309,PGSC0003DMG400030337,PGSC0003DMG402012803,PGSC0003DMG400000173,PGSC0003DMG400028145,PGSC0003DMG400000227,…
GO:0005521	lamin binding	molecular_function	0.13036	0.96738	2	2644	7	29181	PGSC0003DMG400002789,PGSC0003DMG400000421
GO:0008817	cob(I)yrinic acid a,c-diamide adenosyltransferase activity	molecular_function	0.13084	0.96771	2	2644	6	29181	PGSC0003DMG400021456,PGSC0003DMG402018143
GO:0008272	sulfate transport	biological_process	0.13101	0.96771	5	2644	25	29181	PGSC0003DMG400008537,PGSC0003DMG400029074,PGSC0003DMG400019315,PGSC0003DMG400021394,PGSC0003DMG400007463
GO:0015116	sulfate transmembrane transporter activity	molecular_function	0.13101	0.96771	5	2644	25	29181	PGSC0003DMG400029074,PGSC0003DMG400019315,PGSC0003DMG400007463,PGSC0003DMG400021394,PGSC0003DMG400008537
GO:0016861	intramolecular oxidoreductase activity, interconverting aldoses and ketoses	molecular_function	0.13119	0.96771	10	2644	70	29181	PGSC0003DMG400027745,PGSC0003DMG400024998,PGSC0003DMG400025171,PGSC0003DMG400005961,PGSC0003DMG400030509,PGSC0003DMG400000211,PGSC0003DMG400021264,PGSC0003DMG400012910,PGSC0003DMG400026393,PGSC0003DMG400025005
GO:0008121	ubiquinol-cytochrome-c reductase activity	molecular_function	0.13231	0.97174	10	2644	70	29181	PGSC0003DMG400026494,PGSC0003DMG400032789,PGSC0003DMG400010833,PGSC0003DMG400002730,PGSC0003DMG400023697,PGSC0003DMG400020649,PGSC0003DMG400006405,PGSC0003DMG401009709,PGSC0003DMG400002703,PGSC0003DMG400015711
GO:0016681	oxidoreductase activity, acting on diphenols and related substances as donors, cytochrome as acceptor	molecular_function	0.13231	0.97174	10	2644	70	29181	PGSC0003DMG400006405,PGSC0003DMG401009709,PGSC0003DMG400002703,PGSC0003DMG400015711,PGSC0003DMG400002730,PGSC0003DMG400026494,PGSC0003DMG400032789,PGSC0003DMG400010833,PGSC0003DMG400020649,PGSC0003DMG400023697
GO:0070011	peptidase activity, acting on L-amino acid peptides	molecular_function	0.13233	0.97174	173	2644	1668	29181	PGSC0003DMG400022103,PGSC0003DMG400024377,PGSC0003DMG400005668,Novel01387,PGSC0003DMG400023357,PGSC0003DMG400014901,PGSC0003DMG400038332,PGSC0003DMG400005031,PGSC0003DMG400011436,PGSC0003DMG400008004,PGSC0003DMG400005498,PGSC0003DMG400007019,PGSC0003DMG400023362,PGSC0003DMG400003122,PGSC0003DMG400009460,PGSC0003DMG400006768,PGSC0003DMG400003050,PGSC0003DMG400001455,PGSC0003DMG400005667,PGSC0003DM…
GO:0005199	structural constituent of cell wall	molecular_function	0.13264	0.97259	6	2644	37	29181	PGSC0003DMG400000776,PGSC0003DMG400000778,PGSC0003DMG400000783,PGSC0003DMG401009709,PGSC0003DMG400021603,PGSC0003DMG400000779
GO:0005496	steroid binding	molecular_function	0.13302	0.97389	6	2644	35	29181	PGSC0003DMG400030840,PGSC0003DMG400000931,PGSC0003DMG400005956,PGSC0003DMG400004899,PGSC0003DMG400011365,PGSC0003DMG400030551
GO:0030246	carbohydrate binding	molecular_function	0.13491	0.98624	33	2644	267	29181	PGSC0003DMG400001077,Novel01504,PGSC0003DMG400008822,Novel01842,PGSC0003DMG400011792,PGSC0003DMG400012288,PGSC0003DMG400012642,PGSC0003DMG400026384,PGSC0003DMG401015433,PGSC0003DMG401009415,PGSC0003DMG400004401,PGSC0003DMG400013977,PGSC0003DMG400002075,PGSC0003DMG402018143,PGSC0003DMG400003537,PGSC0003DMG400015211,PGSC0003DMG400003343,PGSC0003DMG400014867,PGSC0003DMG400004009,PGSC0003DMG400025627…
GO:0046417	chorismate metabolic process	biological_process	0.13551	0.9892	3	2644	13	29181	PGSC0003DMG401023644,PGSC0003DMG400001438,PGSC0003DMG400009237
GO:0044033	multi-organism metabolic process	biological_process	0.13599	0.98986	16	2644	122	29181	PGSC0003DMG400027954,PGSC0003DMG400014901,PGSC0003DMG400014166,PGSC0003DMG404027324,PGSC0003DMG400011015,PGSC0003DMG400022368,PGSC0003DMG402007406,PGSC0003DMG400028925,PGSC0003DMG400010721,PGSC0003DMG400011218,PGSC0003DMG400000468,PGSC0003DMG400023440,PGSC0003DMG400020364,PGSC0003DMG400004274,PGSC0003DMG400026494,PGSC0003DMG400015793
GO:1990204	oxidoreductase complex	cellular_component	0.13601	0.98986	17	2644	138	29181	PGSC0003DMG400025035,PGSC0003DMG400020819,PGSC0003DMG400002868,PGSC0003DMG400028214,PGSC0003DMG400026323,PGSC0003DMG400016918,PGSC0003DMG400015276,PGSC0003DMG401011681,PGSC0003DMG400018535,PGSC0003DMG400010032,PGSC0003DMG400029087,PGSC0003DMG400030941,PGSC0003DMG400021686,PGSC0003DMG400026342,PGSC0003DMG400016039,PGSC0003DMG400032788,PGSC0003DMG400032538
GO:0030031	cell projection assembly	biological_process	0.13674	0.99371	12	2644	92	29181	PGSC0003DMG400008956,PGSC0003DMG400022888,PGSC0003DMG400002927,PGSC0003DMG400022063,PGSC0003DMG400011036,Novel00078,PGSC0003DMG401027676,PGSC0003DMG400006871,PGSC0003DMG400001433,PGSC0003DMG400008437,PGSC0003DMG400014614,PGSC0003DMG400000376
GO:0006779	porphyrin-containing compound biosynthetic process	biological_process	0.13732	0.99645	20	2644	159	29181	PGSC0003DMG400004572,PGSC0003DMG400027602,PGSC0003DMG400002201,PGSC0003DMG400015678,PGSC0003DMG400009887,PGSC0003DMG400017756,PGSC0003DMG400027156,PGSC0003DMG401026555,PGSC0003DMG400023975,PGSC0003DMG400017020,PGSC0003DMG402001978,PGSC0003DMG400022405,PGSC0003DMG400018665,PGSC0003DMG402028101,PGSC0003DMG401021138,Novel03103,PGSC0003DMG400026114,PGSC0003DMG400023424,Novel01240,Novel03619
GO:0046906	tetrapyrrole binding	molecular_function	0.13754	0.99645	90	2644	848	29181	PGSC0003DMG400023130,PGSC0003DMG400021439,PGSC0003DMG400015183,PGSC0003DMG400003304,PGSC0003DMG400014274,Novel02218,PGSC0003DMG400009788,PGSC0003DMG400021542,PGSC0003DMG400009825,PGSC0003DMG400028096,PGSC0003DMG400017538,PGSC0003DMG400016960,PGSC0003DMG400028953,PGSC0003DMG400009823,PGSC0003DMG400010578,PGSC0003DMG400010174,PGSC0003DMG400001774,PGSC0003DMG400018744,PGSC0003DMG401030469,PGSC0003DM…
GO:0042558	pteridine-containing compound metabolic process	biological_process	0.13776	0.99645	13	2644	99	29181	PGSC0003DMG402028101,PGSC0003DMG400005246,PGSC0003DMG400004572,PGSC0003DMG400026456,PGSC0003DMG400023608,PGSC0003DMG400018793,PGSC0003DMG400030219,PGSC0003DMG400011038,PGSC0003DMG400002612,PGSC0003DMG400001444,PGSC0003DMG400030121,Novel01240,PGSC0003DMG400019316
GO:0004932	mating-type factor pheromone receptor activity	molecular_function	0.13829	0.99645	4	2644	20	29181	PGSC0003DMG400017204,PGSC0003DMG400006945,PGSC0003DMG400016655,PGSC0003DMG400006088
GO:0061630	ubiquitin protein ligase activity	molecular_function	0.13833	0.99645	14	2644	104	29181	PGSC0003DMG400033921,PGSC0003DMG400022845,PGSC0003DMG400012151,PGSC0003DMG400009405,PGSC0003DMG400013334,Novel02003,PGSC0003DMG400015661,PGSC0003DMG400014714,PGSC0003DMG401012339,PGSC0003DMG400012034,PGSC0003DMG400017055,PGSC0003DMG400028200,PGSC0003DMG400004571,PGSC0003DMG400020819
GO:0061659	ubiquitin-like protein ligase activity	molecular_function	0.13833	0.99645	14	2644	104	29181	PGSC0003DMG400022845,PGSC0003DMG400033921,PGSC0003DMG400012151,PGSC0003DMG400009405,PGSC0003DMG400014714,PGSC0003DMG400015661,PGSC0003DMG401012339,PGSC0003DMG400012034,Novel02003,PGSC0003DMG400013334,PGSC0003DMG400017055,PGSC0003DMG400028200,PGSC0003DMG400004571,PGSC0003DMG400020819
GO:0006471	protein ADP-ribosylation	biological_process	0.13963	1	3	2644	13	29181	PGSC0003DMG400011347,PGSC0003DMG400026229,Novel01511
GO:0009308	amine metabolic process	biological_process	0.14007	1	23	2644	187	29181	PGSC0003DMG400028422,PGSC0003DMG400022183,PGSC0003DMG400022268,PGSC0003DMG400024909,PGSC0003DMG400030082,PGSC0003DMG402007810,PGSC0003DMG402002542,PGSC0003DMG401029631,PGSC0003DMG402028101,PGSC0003DMG400002190,PGSC0003DMG400006594,PGSC0003DMG400031836,PGSC0003DMG401013112,PGSC0003DMG400007288,PGSC0003DMG400019449,PGSC0003DMG400002789,PGSC0003DMG400025005,PGSC0003DMG400017824,PGSC0003DMG400023115,…
GO:0030838	positive regulation of actin filament polymerization	biological_process	0.14037	1	5	2644	30	29181	PGSC0003DMG400001549,PGSC0003DMG402004570,PGSC0003DMG400026042,PGSC0003DMG401012339,PGSC0003DMG400013816
GO:0034314	Arp2/3 complex-mediated actin nucleation	biological_process	0.14037	1	5	2644	30	29181	PGSC0003DMG400013816,PGSC0003DMG401012339,PGSC0003DMG402004570,PGSC0003DMG400026042,PGSC0003DMG400001549
GO:0045010	actin nucleation	biological_process	0.14037	1	5	2644	30	29181	PGSC0003DMG400001549,PGSC0003DMG402004570,PGSC0003DMG400026042,PGSC0003DMG400013816,PGSC0003DMG401012339
GO:0042030	ATPase inhibitor activity	molecular_function	0.14053	1	8	2644	55	29181	Novel01511,PGSC0003DMG402008889,PGSC0003DMG400030882,PGSC0003DMG400001419,PGSC0003DMG400026356,PGSC0003DMG400022639,PGSC0003DMG400026304,PGSC0003DMG400014173
GO:0044780	bacterial-type flagellum assembly	biological_process	0.14227	1	7	2644	47	29181	PGSC0003DMG400006871,PGSC0003DMG400014614,PGSC0003DMG400002927,PGSC0003DMG400008437,PGSC0003DMG400000376,Novel00078,PGSC0003DMG400022063
GO:0043228	non-membrane-bounded organelle	cellular_component	0.14241	1	229	2644	2372	29181	Novel01002,PGSC0003DMG400013334,PGSC0003DMG400006588,PGSC0003DMG400007973,PGSC0003DMG400030470,PGSC0003DMG400030432,PGSC0003DMG400006861,PGSC0003DMG400030965,PGSC0003DMG400021927,PGSC0003DMG400002541,PGSC0003DMG400007503,PGSC0003DMG400018583,PGSC0003DMG400008079,PGSC0003DMG400015909,PGSC0003DMG400004285,PGSC0003DMG402002121,PGSC0003DMG400031813,PGSC0003DMG400028388,PGSC0003DMG400027080,Novel00804…
GO:0031344	regulation of cell projection organization	biological_process	0.14256	1	3	2644	14	29181	PGSC0003DMG400002927,PGSC0003DMG400000376,Novel00078
GO:0060491	regulation of cell projection assembly	biological_process	0.14256	1	3	2644	14	29181	PGSC0003DMG400002927,PGSC0003DMG400000376,Novel00078
GO:1902115	regulation of organelle assembly	biological_process	0.14256	1	3	2644	14	29181	PGSC0003DMG400002927,PGSC0003DMG400000376,Novel00078
GO:1902208	regulation of bacterial-type flagellum assembly	biological_process	0.14256	1	3	2644	14	29181	PGSC0003DMG400002927,Novel00078,PGSC0003DMG400000376
GO:0003735	structural constituent of ribosome	molecular_function	0.14311	1	102	2644	1055	29181	PGSC0003DMG400007707,PGSC0003DMG400016891,PGSC0003DMG400017151,PGSC0003DMG400039508,PGSC0003DMG400017350,PGSC0003DMG400015850,PGSC0003DMG400011932,PGSC0003DMG400000634,PGSC0003DMG400027030,PGSC0003DMG401016434,PGSC0003DMG400024661,PGSC0003DMG400009380,PGSC0003DMG400022985,PGSC0003DMG400022845,PGSC0003DMG400018546,PGSC0003DMG400000421,PGSC0003DMG400027086,PGSC0003DMG400017812,PGSC0003DMG400029466,…
GO:0004674	protein serine/threonine kinase activity	molecular_function	0.14432	1	43	2644	365	29181	PGSC0003DMG400029797,PGSC0003DMG400011251,PGSC0003DMG400005418,PGSC0003DMG400020720,PGSC0003DMG400024998,PGSC0003DMG400010067,PGSC0003DMG400022507,PGSC0003DMG400013977,PGSC0003DMG400001059,PGSC0003DMG400009925,PGSC0003DMG400033650,PGSC0003DMG400033060,PGSC0003DMG401015433,PGSC0003DMG400022391,PGSC0003DMG400001752,PGSC0003DMG400025098,PGSC0003DMG400026155,PGSC0003DMG400013885,PGSC0003DMG400014055,…
GO:0005813	centrosome	cellular_component	0.1445	1	1	2644	2	29181	PGSC0003DMG400019835
GO:0019866	organelle inner membrane	cellular_component	0.14475	1	46	2644	426	29181	PGSC0003DMG400018535,PGSC0003DMG400012434,PGSC0003DMG401011681,PGSC0003DMG400025035,PGSC0003DMG400020819,PGSC0003DMG400018763,PGSC0003DMG400002690,PGSC0003DMG400025747,PGSC0003DMG400030560,PGSC0003DMG400026323,PGSC0003DMG400015599,PGSC0003DMG400001656,PGSC0003DMG401017657,PGSC0003DMG400030439,PGSC0003DMG400012640,PGSC0003DMG400004449,PGSC0003DMG400031832,PGSC0003DMG400028842,PGSC0003DMG400030701,…
GO:0005996	monosaccharide metabolic process	biological_process	0.14525	1	22	2644	182	29181	PGSC0003DMG400017309,PGSC0003DMG400001459,PGSC0003DMG400030453,PGSC0003DMG400025384,PGSC0003DMG400000211,PGSC0003DMG400006391,PGSC0003DMG400012910,PGSC0003DMG400032510,PGSC0003DMG400025171,PGSC0003DMG400012642,PGSC0003DMG400006270,PGSC0003DMG400013514,PGSC0003DMG400022276,PGSC0003DMG402014514,Novel01261,PGSC0003DMG400022164,PGSC0003DMG400019719,PGSC0003DMG400026393,PGSC0003DMG400006157,PGSC0003DM…
GO:0016651	oxidoreductase activity, acting on NAD(P)H	molecular_function	0.14603	1	30	2644	262	29181	PGSC0003DMG400014168,PGSC0003DMG400003309,Novel03252,PGSC0003DMG400015599,Novel02552,PGSC0003DMG400007552,Novel02244,PGSC0003DMG400024754,PGSC0003DMG400030882,PGSC0003DMG400022276,PGSC0003DMG400010509,PGSC0003DMG400006270,PGSC0003DMG400033054,PGSC0003DMG400019991,PGSC0003DMG400018635,PGSC0003DMG400031752,PGSC0003DMG400004899,PGSC0003DMG400018150,PGSC0003DMG400021614,Novel02721,PGSC0003DMG40000970…
GO:0031099	regeneration	biological_process	0.14655	1	6	2644	36	29181	PGSC0003DMG400030229,PGSC0003DMG400030134,PGSC0003DMG401014218,PGSC0003DMG400020335,PGSC0003DMG400004470,PGSC0003DMG400033650
GO:0042246	tissue regeneration	biological_process	0.14655	1	6	2644	36	29181	PGSC0003DMG400030229,PGSC0003DMG401014218,PGSC0003DMG400030134,PGSC0003DMG400020335,PGSC0003DMG400033650,PGSC0003DMG400004470
GO:0048589	developmental growth	biological_process	0.14655	1	6	2644	36	29181	PGSC0003DMG400030229,PGSC0003DMG400030134,PGSC0003DMG401014218,PGSC0003DMG400020335,PGSC0003DMG400004470,PGSC0003DMG400033650
GO:0019900	kinase binding	molecular_function	0.14701	1	9	2644	62	29181	PGSC0003DMG401025510,Novel01257,PGSC0003DMG400021507,PGSC0003DMG400022063,PGSC0003DMG400015015,PGSC0003DMG400016790,PGSC0003DMG400016441,PGSC0003DMG400003701,PGSC0003DMG400009051
GO:0004150	dihydroneopterin aldolase activity	molecular_function	0.14722	1	3	2644	13	29181	PGSC0003DMG400030121,PGSC0003DMG400002612,PGSC0003DMG400026456
GO:0008094	DNA-dependent ATPase activity	molecular_function	0.14927	1	17	2644	134	29181	PGSC0003DMG400026278,PGSC0003DMG400024981,PGSC0003DMG400021554,PGSC0003DMG400028102,PGSC0003DMG401009415,PGSC0003DMG400007976,PGSC0003DMG400002190,PGSC0003DMG400004470,PGSC0003DMG400000243,PGSC0003DMG400023802,PGSC0003DMG400030965,PGSC0003DMG400029871,PGSC0003DMG400016505,PGSC0003DMG400033063,PGSC0003DMG400026073,PGSC0003DMG400020474,PGSC0003DMG400017678
GO:0043190	ATP-binding cassette (ABC) transporter complex	cellular_component	0.14948	1	3	2644	14	29181	PGSC0003DMG402024734,PGSC0003DMG400029915,PGSC0003DMG400011721
GO:0098805	whole membrane	cellular_component	0.15019	1	52	2644	474	29181	PGSC0003DMG400001382,PGSC0003DMG401000057,Novel03389,Novel01580,Novel03146,PGSC0003DMG400002066,PGSC0003DMG400016015,PGSC0003DMG400007316,PGSC0003DMG400011133,PGSC0003DMG400001326,PGSC0003DMG400022358,PGSC0003DMG400018823,PGSC0003DMG400009093,PGSC0003DMG400028374,PGSC0003DMG400029967,PGSC0003DMG400030630,PGSC0003DMG400029803,PGSC0003DMG400000864,PGSC0003DMG400015575,PGSC0003DMG400023130,PGSC0003D…
GO:0000976	transcription regulatory region sequence-specific DNA binding	molecular_function	0.15072	1	2	2644	8	29181	PGSC0003DMG400004746,PGSC0003DMG400031267
GO:0005623	cell	cellular_component	0.15095	1	896	2644	9447	29181	PGSC0003DMG400027174,PGSC0003DMG400027168,PGSC0003DMG400027736,PGSC0003DMG400013037,PGSC0003DMG400013345,PGSC0003DMG401011681,PGSC0003DMG400023326,PGSC0003DMG400002624,PGSC0003DMG401017590,PGSC0003DMG401022411,PGSC0003DMG400009177,PGSC0003DMG400004853,PGSC0003DMG400014898,PGSC0003DMG400018823,PGSC0003DMG400009955,PGSC0003DMG400006169,PGSC0003DMG400016649,PGSC0003DMG400006447,PGSC0003DMG400001656,…
GO:0044464	cell part	cellular_component	0.15095	1	896	2644	9447	29181	PGSC0003DMG400010165,PGSC0003DMG400011721,PGSC0003DMG400014148,PGSC0003DMG400027372,PGSC0003DMG400009883,Novel01649,PGSC0003DMG400024524,PGSC0003DMG402027210,PGSC0003DMG400016441,PGSC0003DMG401008915,PGSC0003DMG400000248,PGSC0003DMG400024462,PGSC0003DMG400030496,PGSC0003DMG400009650,PGSC0003DMG400030401,PGSC0003DMG400029087,PGSC0003DMG400018259,PGSC0003DMG400032510,PGSC0003DMG400022038,PGSC0003DM…
GO:0003918	DNA topoisomerase type II (ATP-hydrolyzing) activity	molecular_function	0.1511	1	8	2644	58	29181	PGSC0003DMG400020474,PGSC0003DMG400026073,PGSC0003DMG400007976,PGSC0003DMG400033063,PGSC0003DMG400017678,PGSC0003DMG400004470,PGSC0003DMG400026278,PGSC0003DMG400030965
GO:0061505	DNA topoisomerase II activity	molecular_function	0.1511	1	8	2644	58	29181	PGSC0003DMG400030965,PGSC0003DMG400026278,PGSC0003DMG400004470,PGSC0003DMG400017678,PGSC0003DMG400033063,PGSC0003DMG400007976,PGSC0003DMG400026073,PGSC0003DMG400020474
GO:0044712	single-organism catabolic process	biological_process	0.15165	1	56	2644	505	29181	PGSC0003DMG400021128,PGSC0003DMG400004643,PGSC0003DMG400028177,PGSC0003DMG400018987,PGSC0003DMG400025171,PGSC0003DMG400007819,PGSC0003DMG400019347,PGSC0003DMG400024765,PGSC0003DMG400007233,PGSC0003DMG400020264,PGSC0003DMG400028214,PGSC0003DMG400012802,PGSC0003DMG400012602,PGSC0003DMG400029938,PGSC0003DMG400019873,PGSC0003DMG400001363,PGSC0003DMG400012997,PGSC0003DMG400001976,PGSC0003DMG400001752,…
GO:0015077	monovalent inorganic cation transmembrane transporter activity	molecular_function	0.15169	1	96	2644	953	29181	PGSC0003DMG400011649,PGSC0003DMG400030453,PGSC0003DMG400009154,PGSC0003DMG400000301,PGSC0003DMG400000723,PGSC0003DMG400018792,PGSC0003DMG400016891,Novel01055,PGSC0003DMG400009074,PGSC0003DMG400008751,PGSC0003DMG400016505,PGSC0003DMG400006871,PGSC0003DMG400015405,PGSC0003DMG400027590,PGSC0003DMG400015015,PGSC0003DMG400023464,PGSC0003DMG400013474,PGSC0003DMG400004753,PGSC0003DMG400028137,PGSC0003DM…
GO:0007186	G-protein coupled receptor signaling pathway	biological_process	0.15235	1	49	2644	433	29181	PGSC0003DMG400004509,PGSC0003DMG402002542,PGSC0003DMG400006945,PGSC0003DMG401014396,PGSC0003DMG400003889,Novel00629,PGSC0003DMG400030229,PGSC0003DMG400003089,PGSC0003DMG400008579,PGSC0003DMG400006088,PGSC0003DMG400018651,PGSC0003DMG400016655,PGSC0003DMG400029289,Novel03146,PGSC0003DMG400017204,PGSC0003DMG400023326,PGSC0003DMG400014125,PGSC0003DMG400013442,PGSC0003DMG400028371,PGSC0003DMG400021456…
GO:0004576	oligosaccharyl transferase activity	molecular_function	0.15239	1	4	2644	23	29181	PGSC0003DMG400023340,PGSC0003DMG400025078,PGSC0003DMG400014847,PGSC0003DMG400027509
GO:0008061	chitin binding	molecular_function	0.1525	1	7	2644	55	29181	PGSC0003DMG400026855,PGSC0003DMG400032789,PGSC0003DMG400005896,PGSC0003DMG400001438,PGSC0003DMG400025063,PGSC0003DMG400026854,PGSC0003DMG400026853
GO:0000746	conjugation	biological_process	0.15361	1	9	2644	63	29181	PGSC0003DMG400014134,PGSC0003DMG400031365,PGSC0003DMG400024585,PGSC0003DMG400008537,PGSC0003DMG400029252,PGSC0003DMG400015391,PGSC0003DMG400025616,PGSC0003DMG400025848,PGSC0003DMG400032135
GO:0004743	pyruvate kinase activity	molecular_function	0.15431	1	3	2644	14	29181	PGSC0003DMG400028177,PGSC0003DMG400019247,PGSC0003DMG400002690
GO:0005381	iron ion transmembrane transporter activity	molecular_function	0.15439	1	16	2644	119	29181	PGSC0003DMG400009401,PGSC0003DMG400013442,PGSC0003DMG400017824,PGSC0003DMG400012984,PGSC0003DMG400030630,PGSC0003DMG401013112,PGSC0003DMG401029631,PGSC0003DMG400010869,PGSC0003DMG402002542,PGSC0003DMG400006378,PGSC0003DMG400025035,PGSC0003DMG402007810,PGSC0003DMG400014512,PGSC0003DMG402003705,PGSC0003DMG400024909,PGSC0003DMG400028422
GO:0006570	tyrosine metabolic process	biological_process	0.1546	1	3	2644	14	29181	PGSC0003DMG400023957,PGSC0003DMG400030683,PGSC0003DMG400020334
GO:0019205	nucleobase-containing compound kinase activity	molecular_function	0.15461	1	19	2644	150	29181	PGSC0003DMG400021818,PGSC0003DMG400001709,PGSC0003DMG400016553,PGSC0003DMG400020294,PGSC0003DMG400020618,PGSC0003DMG400028925,PGSC0003DMG400023608,PGSC0003DMG400001247,PGSC0003DMG400022268,PGSC0003DMG400027906,PGSC0003DMG400003803,PGSC0003DMG400013779,PGSC0003DMG400015745,PGSC0003DMG400026784,PGSC0003DMG400018535,PGSC0003DMG400021265,PGSC0003DMG400015211,PGSC0003DMG400012276,PGSC0003DMG401029631
GO:0006555	methionine metabolic process	biological_process	0.15484	1	5	2644	30	29181	PGSC0003DMG400033921,PGSC0003DMG400028127,PGSC0003DMG400016168,PGSC0003DMG400010674,PGSC0003DMG400028732
GO:0050852	T cell receptor signaling pathway	biological_process	0.15591	1	4	2644	22	29181	PGSC0003DMG400011246,PGSC0003DMG400009900,PGSC0003DMG400000421,PGSC0003DMG400027086
GO:0044380	protein localization to cytoskeleton	biological_process	0.15646	1	4	2644	25	29181	PGSC0003DMG400024754,PGSC0003DMG400011322,PGSC0003DMG400017350,PGSC0003DMG400018921
GO:0071988	protein localization to spindle pole body	biological_process	0.15646	1	4	2644	25	29181	PGSC0003DMG400017350,PGSC0003DMG400018921,PGSC0003DMG400024754,PGSC0003DMG400011322
GO:0072698	protein localization to microtubule cytoskeleton	biological_process	0.15646	1	4	2644	25	29181	PGSC0003DMG400017350,PGSC0003DMG400018921,PGSC0003DMG400024754,PGSC0003DMG400011322
GO:1901615	organic hydroxy compound metabolic process	biological_process	0.15689	1	16	2644	132	29181	PGSC0003DMG400003792,PGSC0003DMG400026225,PGSC0003DMG400010076,PGSC0003DMG400012634,PGSC0003DMG400010415,PGSC0003DMG400016878,PGSC0003DMG400030496,PGSC0003DMG400016535,PGSC0003DMG400013645,PGSC0003DMG400009219,PGSC0003DMG402014514,PGSC0003DMG402015686,PGSC0003DMG400028234,PGSC0003DMG400001976,PGSC0003DMG400035836,PGSC0003DMG400029730
GO:0003852	2-isopropylmalate synthase activity	molecular_function	0.15757	1	2	2644	7	29181	PGSC0003DMG400014622,PGSC0003DMG400028102
GO:0006664	glycolipid metabolic process	biological_process	0.15827	1	29	2644	248	29181	PGSC0003DMG400018670,PGSC0003DMG402023631,PGSC0003DMG400009405,PGSC0003DMG400022026,PGSC0003DMG400022911,PGSC0003DMG400002291,PGSC0003DMG400005696,PGSC0003DMG400021558,PGSC0003DMG400019873,PGSC0003DMG401028367,PGSC0003DMG400007965,PGSC0003DMG400001363,PGSC0003DMG400004318,PGSC0003DMG400028124,PGSC0003DMG400033029,PGSC0003DMG400026516,PGSC0003DMG400001580,PGSC0003DMG401031070,PGSC0003DMG400002204,…
GO:0044212	transcription regulatory region DNA binding	molecular_function	0.15861	1	3	2644	15	29181	PGSC0003DMG400004746,PGSC0003DMG400004285,PGSC0003DMG400031267
GO:0051348	negative regulation of transferase activity	biological_process	0.15933	1	7	2644	47	29181	PGSC0003DMG400027771,PGSC0003DMG400014854,PGSC0003DMG400015575,PGSC0003DMG400006815,PGSC0003DMG400001326,PGSC0003DMG400007819,PGSC0003DMG400022507
GO:0004564	beta-fructofuranosidase activity	molecular_function	0.15962	1	3	2644	14	29181	PGSC0003DMG400014869,PGSC0003DMG401022600,PGSC0003DMG400013856
GO:0004575	sucrose alpha-glucosidase activity	molecular_function	0.15962	1	3	2644	14	29181	PGSC0003DMG400013856,PGSC0003DMG400014869,PGSC0003DMG401022600
GO:0090599	alpha-glucosidase activity	molecular_function	0.15962	1	3	2644	14	29181	PGSC0003DMG401022600,PGSC0003DMG400014869,PGSC0003DMG400013856
GO:0016503	pheromone receptor activity	molecular_function	0.15965	1	4	2644	21	29181	PGSC0003DMG400006945,PGSC0003DMG400006088,PGSC0003DMG400016655,PGSC0003DMG400017204
GO:0020037	heme binding	molecular_function	0.16046	1	85	2644	806	29181	PGSC0003DMG400019274,PGSC0003DMG401025083,PGSC0003DMG402030469,PGSC0003DMG400024643,PGSC0003DMG402012803,PGSC0003DMG400018876,PGSC0003DMG400003289,PGSC0003DMG400014055,PGSC0003DMG400030413,PGSC0003DMG400046813,PGSC0003DMG400019320,PGSC0003DMG402030815,PGSC0003DMG400014867,PGSC0003DMG400004442,Novel01675,PGSC0003DMG400028642,PGSC0003DMG400001752,Novel02153,PGSC0003DMG400021157,PGSC0003DMG400000511…
GO:0034637	cellular carbohydrate biosynthetic process	biological_process	0.16117	1	28	2644	234	29181	PGSC0003DMG400015214,PGSC0003DMG400012852,PGSC0003DMG400013443,PGSC0003DMG400004253,PGSC0003DMG400029348,PGSC0003DMG400010833,PGSC0003DMG402017902,PGSC0003DMG400002396,PGSC0003DMG401003156,PGSC0003DMG402005942,PGSC0003DMG400007965,PGSC0003DMG400002292,PGSC0003DMG400020287,PGSC0003DMG400029938,PGSC0003DMG400017516,PGSC0003DMG400003067,PGSC0003DMG400003417,PGSC0003DMG400024627,Novel03255,PGSC0003DM…
GO:0006658	phosphatidylserine metabolic process	biological_process	0.16146	1	2	2644	7	29181	PGSC0003DMG400017627,PGSC0003DMG400006021
GO:0006659	phosphatidylserine biosynthetic process	biological_process	0.16146	1	2	2644	7	29181	PGSC0003DMG400006021,PGSC0003DMG400017627
GO:0030518	intracellular steroid hormone receptor signaling pathway	biological_process	0.16172	1	4	2644	21	29181	PGSC0003DMG400000931,PGSC0003DMG400005956,PGSC0003DMG400011365,PGSC0003DMG400030551
GO:0030522	intracellular receptor signaling pathway	biological_process	0.16172	1	4	2644	21	29181	PGSC0003DMG400030551,PGSC0003DMG400011365,PGSC0003DMG400005956,PGSC0003DMG400000931
GO:0008827	cytochrome o ubiquinol oxidase activity	molecular_function	0.16261	1	2	2644	7	29181	PGSC0003DMG400002678,PGSC0003DMG400010231
GO:0015093	ferrous iron transmembrane transporter activity	molecular_function	0.16385	1	14	2644	102	29181	PGSC0003DMG400006378,PGSC0003DMG402007810,PGSC0003DMG400013442,PGSC0003DMG401029631,PGSC0003DMG402002542,PGSC0003DMG400009401,PGSC0003DMG401013112,PGSC0003DMG400028422,PGSC0003DMG402003705,PGSC0003DMG400024909,PGSC0003DMG400030630,PGSC0003DMG400012984,PGSC0003DMG400017824,PGSC0003DMG400014512
GO:0015684	ferrous iron transport	biological_process	0.16385	1	14	2644	102	29181	PGSC0003DMG400030630,PGSC0003DMG400012984,PGSC0003DMG400017824,PGSC0003DMG400014512,PGSC0003DMG401013112,PGSC0003DMG400028422,PGSC0003DMG400024909,PGSC0003DMG402003705,PGSC0003DMG400009401,PGSC0003DMG402007810,PGSC0003DMG400013442,PGSC0003DMG400006378,PGSC0003DMG402002542,PGSC0003DMG401029631
GO:0006626	protein targeting to mitochondrion	biological_process	0.16408	1	10	2644	76	29181	PGSC0003DMG400007597,Novel03389,PGSC0003DMG400011731,PGSC0003DMG400024615,PGSC0003DMG400013894,PGSC0003DMG400033637,Novel01580,PGSC0003DMG400030630,PGSC0003DMG400029803,PGSC0003DMG400016015
GO:0051235	maintenance of location	biological_process	0.16423	1	11	2644	82	29181	PGSC0003DMG400012543,PGSC0003DMG400024081,Novel01650,PGSC0003DMG400028904,PGSC0003DMG400003417,PGSC0003DMG400004746,PGSC0003DMG400004437,PGSC0003DMG400030474,PGSC0003DMG400029948,PGSC0003DMG400002190,PGSC0003DMG400020169
GO:0015095	magnesium ion transmembrane transporter activity	molecular_function	0.16473	1	6	2644	38	29181	PGSC0003DMG400002134,PGSC0003DMG400031145,PGSC0003DMG402023438,PGSC0003DMG400004439,PGSC0003DMG400028102,PGSC0003DMG401024899
GO:0015693	magnesium ion transport	biological_process	0.16473	1	6	2644	38	29181	PGSC0003DMG400004439,PGSC0003DMG401024899,PGSC0003DMG400028102,PGSC0003DMG402023438,PGSC0003DMG400002134,PGSC0003DMG400031145
GO:0009132	nucleoside diphosphate metabolic process	biological_process	0.16654	1	13	2644	100	29181	PGSC0003DMG400028177,PGSC0003DMG402023631,PGSC0003DMG400027315,PGSC0003DMG400012910,PGSC0003DMG400025171,PGSC0003DMG400002690,PGSC0003DMG400012276,PGSC0003DMG400005494,PGSC0003DMG400020253,PGSC0003DMG400011044,Novel00282,PGSC0003DMG400019247,PGSC0003DMG400002675
GO:0046677	response to antibiotic	biological_process	0.167	1	9	2644	64	29181	PGSC0003DMG400006391,PGSC0003DMG400017350,PGSC0003DMG400023264,PGSC0003DMG400017494,PGSC0003DMG400019201,PGSC0003DMG400022276,PGSC0003DMG400011195,PGSC0003DMG400022506,PGSC0003DMG400007288
GO:0005840	ribosome	cellular_component	0.1672	1	100	2644	1041	29181	PGSC0003DMG400016891,PGSC0003DMG400039508,PGSC0003DMG400017151,PGSC0003DMG400007707,PGSC0003DMG400027030,PGSC0003DMG400000634,PGSC0003DMG400015850,PGSC0003DMG400012288,PGSC0003DMG400011932,PGSC0003DMG400017350,PGSC0003DMG401012965,PGSC0003DMG400019130,PGSC0003DMG400013177,PGSC0003DMG400029466,PGSC0003DMG400031043,PGSC0003DMG400018546,PGSC0003DMG400022845,PGSC0003DMG400000421,PGSC0003DMG400017812,…
GO:0055070	copper ion homeostasis	biological_process	0.16788	1	2	2644	9	29181	PGSC0003DMG400009472,PGSC0003DMG400033637
GO:0008064	regulation of actin polymerization or depolymerization	biological_process	0.1681	1	8	2644	57	29181	PGSC0003DMG400013816,PGSC0003DMG400009883,PGSC0003DMG402004570,PGSC0003DMG400001549,Novel01446,PGSC0003DMG400022318,PGSC0003DMG401012339,PGSC0003DMG400026042
GO:0008154	actin polymerization or depolymerization	biological_process	0.1681	1	8	2644	57	29181	PGSC0003DMG401012339,PGSC0003DMG400022318,Novel01446,PGSC0003DMG400026042,PGSC0003DMG400013816,PGSC0003DMG400001549,PGSC0003DMG400009883,PGSC0003DMG402004570
GO:0030041	actin filament polymerization	biological_process	0.1681	1	8	2644	57	29181	PGSC0003DMG400009883,PGSC0003DMG402004570,PGSC0003DMG400001549,PGSC0003DMG400013816,PGSC0003DMG400026042,Novel01446,PGSC0003DMG400022318,PGSC0003DMG401012339
GO:0030832	regulation of actin filament length	biological_process	0.1681	1	8	2644	57	29181	PGSC0003DMG401012339,Novel01446,PGSC0003DMG400022318,PGSC0003DMG400026042,PGSC0003DMG400013816,PGSC0003DMG400001549,PGSC0003DMG400009883,PGSC0003DMG402004570
GO:0030833	regulation of actin filament polymerization	biological_process	0.1681	1	8	2644	57	29181	PGSC0003DMG400013816,PGSC0003DMG402004570,PGSC0003DMG400009883,PGSC0003DMG400001549,PGSC0003DMG400022318,Novel01446,PGSC0003DMG401012339,PGSC0003DMG400026042
GO:0032535	regulation of cellular component size	biological_process	0.1681	1	8	2644	57	29181	PGSC0003DMG400001549,PGSC0003DMG400009883,PGSC0003DMG402004570,PGSC0003DMG400013816,PGSC0003DMG400026042,PGSC0003DMG401012339,Novel01446,PGSC0003DMG400022318
GO:0032956	regulation of actin cytoskeleton organization	biological_process	0.1681	1	8	2644	57	29181	PGSC0003DMG400026042,PGSC0003DMG400022318,Novel01446,PGSC0003DMG401012339,PGSC0003DMG400009883,PGSC0003DMG402004570,PGSC0003DMG400001549,PGSC0003DMG400013816
GO:0032970	regulation of actin filament-based process	biological_process	0.1681	1	8	2644	57	29181	PGSC0003DMG400009883,PGSC0003DMG402004570,PGSC0003DMG400001549,PGSC0003DMG400013816,PGSC0003DMG400026042,PGSC0003DMG400022318,Novel01446,PGSC0003DMG401012339
GO:0048598	embryonic morphogenesis	biological_process	0.16829	1	1	2644	2	29181	PGSC0003DMG400023440
GO:0072669	tRNA-splicing ligase complex	cellular_component	0.16829	1	1	2644	2	29181	PGSC0003DMG400023440
GO:0019318	hexose metabolic process	biological_process	0.16926	1	18	2644	149	29181	PGSC0003DMG400001566,PGSC0003DMG400024998,PGSC0003DMG400006157,PGSC0003DMG400019719,PGSC0003DMG400026393,PGSC0003DMG400029825,PGSC0003DMG400013514,PGSC0003DMG400022276,PGSC0003DMG400006270,PGSC0003DMG402014514,PGSC0003DMG400025171,PGSC0003DMG400006391,PGSC0003DMG400000211,PGSC0003DMG400032510,PGSC0003DMG400012910,PGSC0003DMG400017309,PGSC0003DMG400001459,PGSC0003DMG400030453
GO:0016667	oxidoreductase activity, acting on a sulfur group of donors	molecular_function	0.17043	1	22	2644	210	29181	PGSC0003DMG400023359,PGSC0003DMG400031370,PGSC0003DMG400005668,PGSC0003DMG400025255,PGSC0003DMG400015749,PGSC0003DMG400014627,PGSC0003DMG400011731,PGSC0003DMG402002164,PGSC0003DMG400021856,PGSC0003DMG401003899,PGSC0003DMG400014322,PGSC0003DMG400016401,PGSC0003DMG400007084,PGSC0003DMG400020080,PGSC0003DMG400003755,PGSC0003DMG400000521,PGSC0003DMG400002169,PGSC0003DMG400001410,PGSC0003DMG400002167,…
GO:0031399	regulation of protein modification process	biological_process	0.17087	1	12	2644	93	29181	PGSC0003DMG400011246,PGSC0003DMG400001326,PGSC0003DMG400002852,PGSC0003DMG400015575,PGSC0003DMG400014854,PGSC0003DMG400027771,PGSC0003DMG400018119,PGSC0003DMG400007819,PGSC0003DMG400006815,PGSC0003DMG400020383,PGSC0003DMG400022507,PGSC0003DMG400009051
GO:0008745	N-acetylmuramoyl-L-alanine amidase activity	molecular_function	0.17125	1	1	2644	2	29181	PGSC0003DMG400025668
GO:0072524	pyridine-containing compound metabolic process	biological_process	0.17207	1	16	2644	127	29181	PGSC0003DMG400011044,PGSC0003DMG400019247,PGSC0003DMG400010485,Novel00931,PGSC0003DMG400002690,PGSC0003DMG400005961,PGSC0003DMG400030509,PGSC0003DMG402023631,PGSC0003DMG400002675,PGSC0003DMG400025121,PGSC0003DMG400005494,PGSC0003DMG400001932,PGSC0003DMG400025171,PGSC0003DMG400016535,PGSC0003DMG400012910,PGSC0003DMG400028177
GO:0042438	melanin biosynthetic process	biological_process	0.17217	1	1	2644	2	29181	PGSC0003DMG400029730
GO:0046189	phenol-containing compound biosynthetic process	biological_process	0.17217	1	1	2644	2	29181	PGSC0003DMG400029730
GO:0006821	chloride transport	biological_process	0.17217	1	5	2644	30	29181	PGSC0003DMG400002730,PGSC0003DMG400024904,PGSC0003DMG400031145,PGSC0003DMG400032825,PGSC0003DMG402031322
GO:0004402	histone acetyltransferase activity	molecular_function	0.17342	1	6	2644	39	29181	PGSC0003DMG400000729,PGSC0003DMG400031145,PGSC0003DMG400015229,PGSC0003DMG400015213,PGSC0003DMG401026984,PGSC0003DMG400016395
GO:0009892	negative regulation of metabolic process	biological_process	0.17406	1	35	2644	308	29181	PGSC0003DMG400008945,PGSC0003DMG400028234,PGSC0003DMG400027269,PGSC0003DMG400022405,PGSC0003DMG400026356,PGSC0003DMG400022507,PGSC0003DMG400015477,PGSC0003DMG400025501,PGSC0003DMG400024698,PGSC0003DMG400002612,PGSC0003DMG400007150,PGSC0003DMG400014901,PGSC0003DMG400007819,PGSC0003DMG400030551,PGSC0003DMG400008000,PGSC0003DMG400003122,PGSC0003DMG400001326,PGSC0003DMG401004603,PGSC0003DMG400014854,…
GO:0000255	allantoin metabolic process	biological_process	0.17427	1	3	2644	16	29181	PGSC0003DMG400013879,PGSC0003DMG400025471,PGSC0003DMG400010231
GO:0000256	allantoin catabolic process	biological_process	0.17427	1	3	2644	16	29181	PGSC0003DMG400025471,PGSC0003DMG400013879,PGSC0003DMG400010231
GO:0004764	shikimate 3-dehydrogenase (NADP+) activity	molecular_function	0.17471	1	2	2644	8	29181	PGSC0003DMG400005284,Novel00276
GO:0002115	store-operated calcium entry	biological_process	0.17551	1	3	2644	16	29181	PGSC0003DMG400006663,PGSC0003DMG400013474,PGSC0003DMG400009180
GO:0051924	regulation of calcium ion transport	biological_process	0.17551	1	3	2644	16	29181	PGSC0003DMG400009180,PGSC0003DMG400013474,PGSC0003DMG400006663
GO:2001256	regulation of store-operated calcium entry	biological_process	0.17551	1	3	2644	16	29181	PGSC0003DMG400009180,PGSC0003DMG400006663,PGSC0003DMG400013474
GO:0051260	protein homooligomerization	biological_process	0.17573	1	6	2644	37	29181	PGSC0003DMG400018701,PGSC0003DMG401030517,PGSC0003DMG400011195,PGSC0003DMG400019695,PGSC0003DMG400027532,PGSC0003DMG400012201
GO:0009081	branched-chain amino acid metabolic process	biological_process	0.17586	1	6	2644	37	29181	PGSC0003DMG400014622,PGSC0003DMG400028102,PGSC0003DMG400020601,PGSC0003DMG400021507,PGSC0003DMG400004351,PGSC0003DMG400020321
GO:0009082	branched-chain amino acid biosynthetic process	biological_process	0.17586	1	6	2644	37	29181	PGSC0003DMG400020321,PGSC0003DMG400004351,PGSC0003DMG400021507,PGSC0003DMG400028102,PGSC0003DMG400020601,PGSC0003DMG400014622
GO:0015098	molybdate ion transmembrane transporter activity	molecular_function	0.1765	1	5	2644	29	29181	Novel02668,PGSC0003DMG400022377,PGSC0003DMG400004318,PGSC0003DMG400004253,PGSC0003DMG400018515
GO:0015689	molybdate ion transport	biological_process	0.1765	1	5	2644	29	29181	Novel02668,PGSC0003DMG400022377,PGSC0003DMG400004318,PGSC0003DMG400018515,PGSC0003DMG400004253
GO:0045261	proton-transporting ATP synthase complex, catalytic core F(1)	cellular_component	0.17697	1	8	2644	64	29181	PGSC0003DMG400012616,PGSC0003DMG400000421,PGSC0003DMG400028842,PGSC0003DMG400027590,PGSC0003DMG400018763,PGSC0003DMG402023631,PGSC0003DMG400030560,PGSC0003DMG400006622
GO:0031419	cobalamin binding	molecular_function	0.17806	1	5	2644	31	29181	PGSC0003DMG400002427,PGSC0003DMG400012578,PGSC0003DMG401008890,PGSC0003DMG402008890,PGSC0003DMG400013896
GO:0007530	sex determination	biological_process	0.1796	1	3	2644	16	29181	PGSC0003DMG400007199,PGSC0003DMG400023833,PGSC0003DMG400021676
GO:0007531	mating type determination	biological_process	0.1796	1	3	2644	16	29181	PGSC0003DMG400021676,PGSC0003DMG400023833,PGSC0003DMG400007199
GO:0045165	cell fate commitment	biological_process	0.1796	1	3	2644	16	29181	PGSC0003DMG400021676,PGSC0003DMG400023833,PGSC0003DMG400007199
GO:0006230	TMP biosynthetic process	biological_process	0.18099	1	3	2644	15	29181	PGSC0003DMG400003803,PGSC0003DMG400021818,PGSC0003DMG400020618
GO:0009173	pyrimidine ribonucleoside monophosphate metabolic process	biological_process	0.18099	1	3	2644	15	29181	PGSC0003DMG400003803,PGSC0003DMG400021818,PGSC0003DMG400020618
GO:0009174	pyrimidine ribonucleoside monophosphate biosynthetic process	biological_process	0.18099	1	3	2644	15	29181	PGSC0003DMG400020618,PGSC0003DMG400003803,PGSC0003DMG400021818
GO:0046044	TMP metabolic process	biological_process	0.18099	1	3	2644	15	29181	PGSC0003DMG400003803,PGSC0003DMG400021818,PGSC0003DMG400020618
GO:0000989	transcription factor activity, transcription factor binding	molecular_function	0.18109	1	39	2644	359	29181	PGSC0003DMG400003309,PGSC0003DMG400022405,Novel01031,PGSC0003DMG400022507,PGSC0003DMG400015211,PGSC0003DMG400008437,PGSC0003DMG400031145,PGSC0003DMG400001684,PGSC0003DMG400007462,PGSC0003DMG400029466,PGSC0003DMG400001659,PGSC0003DMG400013434,PGSC0003DMG400003122,PGSC0003DMG401026984,PGSC0003DMG400017298,PGSC0003DMG400028961,PGSC0003DMG400015711,PGSC0003DMG400023462,PGSC0003DMG402017902,PGSC0003DM…
GO:0019385	methanogenesis, from acetate	biological_process	0.18148	1	3	2644	14	29181	Novel00852,PGSC0003DMG400009956,PGSC0003DMG400006270
GO:0015749	monosaccharide transport	biological_process	0.18239	1	4	2644	24	29181	PGSC0003DMG400026246,PGSC0003DMG402005074,PGSC0003DMG400032789,PGSC0003DMG400009074
GO:0009147	pyrimidine nucleoside triphosphate metabolic process	biological_process	0.1824	1	4	2644	23	29181	PGSC0003DMG400008676,PGSC0003DMG400012276,PGSC0003DMG400022200,PGSC0003DMG400022502
GO:0004869	cysteine-type endopeptidase inhibitor activity	molecular_function	0.18252	1	6	2644	46	29181	PGSC0003DMG400007626,PGSC0003DMG402030499,PGSC0003DMG400002690,PGSC0003DMG400008460,PGSC0003DMG400029323,PGSC0003DMG401029222
GO:0008770	[acyl-carrier-protein] phosphodiesterase activity	molecular_function	0.18284	1	2	2644	8	29181	PGSC0003DMG400029552,PGSC0003DMG400024591
GO:0030259	lipid glycosylation	biological_process	0.18378	1	10	2644	70	29181	PGSC0003DMG400016121,PGSC0003DMG400031360,PGSC0003DMG400021785,PGSC0003DMG400005667,PGSC0003DMG400016193,PGSC0003DMG400021347,PGSC0003DMG401030822,PGSC0003DMG400021116,PGSC0003DMG400026323,PGSC0003DMG400009529
GO:0050830	defense response to Gram-positive bacterium	biological_process	0.18428	1	5	2644	33	29181	PGSC0003DMG400006995,PGSC0003DMG400007008,PGSC0003DMG401016434,PGSC0003DMG400011541,PGSC0003DMG400028406
GO:0004308	exo-alpha-sialidase activity	molecular_function	0.18462	1	2	2644	8	29181	PGSC0003DMG400019719,PGSC0003DMG400025931
GO:0016997	alpha-sialidase activity	molecular_function	0.18462	1	2	2644	8	29181	PGSC0003DMG400019719,PGSC0003DMG400025931
GO:0042113	B cell activation	biological_process	0.18471	1	1	2644	2	29181	PGSC0003DMG400027590
GO:0010008	endosome membrane	cellular_component	0.18474	1	4	2644	23	29181	PGSC0003DMG400001382,PGSC0003DMG400001326,PGSC0003DMG400008000,PGSC0003DMG400027269
GO:0033821	DNA beta-glucosyltransferase activity	molecular_function	0.1849	1	4	2644	24	29181	PGSC0003DMG400028214,PGSC0003DMG400001567,PGSC0003DMG400026132,PGSC0003DMG400011106
GO:0044782	cilium organization	biological_process	0.18507	1	4	2644	25	29181	PGSC0003DMG400022888,PGSC0003DMG400009094,PGSC0003DMG400008956,PGSC0003DMG400001433
GO:0006027	glycosaminoglycan catabolic process	biological_process	0.18508	1	2	2644	9	29181	PGSC0003DMG400019446,PGSC0003DMG400025668
GO:0009253	peptidoglycan catabolic process	biological_process	0.18508	1	2	2644	9	29181	PGSC0003DMG400025668,PGSC0003DMG400019446
GO:0008013	beta-catenin binding	molecular_function	0.18642	1	6	2644	38	29181	PGSC0003DMG400017439,PGSC0003DMG401028367,PGSC0003DMG400020494,PGSC0003DMG403024882,PGSC0003DMG400033335,PGSC0003DMG400008961
GO:0008484	sulfuric ester hydrolase activity	molecular_function	0.18669	1	2	2644	8	29181	PGSC0003DMG400020158,PGSC0003DMG400030124
GO:0005267	potassium channel activity	molecular_function	0.18704	1	13	2644	104	29181	Novel01055,PGSC0003DMG400023512,PGSC0003DMG400001780,PGSC0003DMG401030861,PGSC0003DMG401007403,PGSC0003DMG401004716,PGSC0003DMG402018143,PGSC0003DMG400009703,PGSC0003DMG400015607,Novel00232,PGSC0003DMG400030373,PGSC0003DMG400008936,PGSC0003DMG400003993
GO:0046812	host cell surface binding	molecular_function	0.18711	1	6	2644	40	29181	PGSC0003DMG400025587,PGSC0003DMG400020648,PGSC0003DMG400003574,PGSC0003DMG400013485,PGSC0003DMG403018293,Novel01266
GO:0006544	glycine metabolic process	biological_process	0.18746	1	2	2644	8	29181	PGSC0003DMG400029938,PGSC0003DMG400006140
GO:0005669	transcription factor TFIID complex	cellular_component	0.18747	1	5	2644	36	29181	PGSC0003DMG403030312,PGSC0003DMG401024842,PGSC0003DMG401008565,PGSC0003DMG403020240,PGSC0003DMG400027364
GO:0008384	IkappaB kinase activity	molecular_function	0.1881	1	3	2644	16	29181	Novel00545,PGSC0003DMG400013977,PGSC0003DMG400029263
GO:0031334	positive regulation of protein complex assembly	biological_process	0.18816	1	6	2644	41	29181	PGSC0003DMG400013816,PGSC0003DMG400031813,PGSC0003DMG401012339,PGSC0003DMG400001549,PGSC0003DMG402004570,PGSC0003DMG400026042
GO:0032273	positive regulation of protein polymerization	biological_process	0.18816	1	6	2644	41	29181	PGSC0003DMG400031813,PGSC0003DMG400013816,PGSC0003DMG401012339,PGSC0003DMG400001549,PGSC0003DMG400026042,PGSC0003DMG402004570
GO:0044089	positive regulation of cellular component biogenesis	biological_process	0.18816	1	6	2644	41	29181	PGSC0003DMG401012339,PGSC0003DMG400013816,PGSC0003DMG400031813,PGSC0003DMG400001549,PGSC0003DMG402004570,PGSC0003DMG400026042
GO:0051495	positive regulation of cytoskeleton organization	biological_process	0.18816	1	6	2644	41	29181	PGSC0003DMG400013816,PGSC0003DMG400031813,PGSC0003DMG401012339,PGSC0003DMG400001549,PGSC0003DMG402004570,PGSC0003DMG400026042
GO:0008544	epidermis development	biological_process	0.1888	1	3	2644	16	29181	PGSC0003DMG400001461,PGSC0003DMG400020906,PGSC0003DMG401020908
GO:0006729	tetrahydrobiopterin biosynthetic process	biological_process	0.18893	1	2	2644	9	29181	PGSC0003DMG400005246,PGSC0003DMG400001444
GO:0008124	4-alpha-hydroxytetrahydrobiopterin dehydratase activity	molecular_function	0.18893	1	2	2644	9	29181	PGSC0003DMG400005246,PGSC0003DMG400001444
GO:0046146	tetrahydrobiopterin metabolic process	biological_process	0.18893	1	2	2644	9	29181	PGSC0003DMG400001444,PGSC0003DMG400005246
GO:0030474	spindle pole body duplication	biological_process	0.18907	1	5	2644	38	29181	PGSC0003DMG400023555,PGSC0003DMG400017350,PGSC0003DMG400018921,PGSC0003DMG400024754,PGSC0003DMG400011322
GO:0051300	spindle pole body organization	biological_process	0.18907	1	5	2644	38	29181	PGSC0003DMG400024754,PGSC0003DMG400011322,PGSC0003DMG400017350,PGSC0003DMG400023555,PGSC0003DMG400018921
GO:0042274	ribosomal small subunit biogenesis	biological_process	0.18985	1	3	2644	15	29181	PGSC0003DMG400026565,PGSC0003DMG400028364,PGSC0003DMG400000046
GO:0042301	phosphate ion binding	molecular_function	0.19004	1	4	2644	24	29181	PGSC0003DMG400021307,PGSC0003DMG400030964,PGSC0003DMG400022507,PGSC0003DMG400028127
GO:0005157	macrophage colony-stimulating factor receptor binding	molecular_function	0.19019	1	1	2644	2	29181	PGSC0003DMG400002852
GO:0009394	2'-deoxyribonucleotide metabolic process	biological_process	0.19021	1	7	2644	51	29181	PGSC0003DMG400003803,PGSC0003DMG400021818,PGSC0003DMG400022200,PGSC0003DMG400022502,PGSC0003DMG400002932,PGSC0003DMG400020618,PGSC0003DMG400008676
GO:0019692	deoxyribose phosphate metabolic process	biological_process	0.19021	1	7	2644	51	29181	PGSC0003DMG400002932,PGSC0003DMG400020618,PGSC0003DMG400008676,PGSC0003DMG400003803,PGSC0003DMG400022200,PGSC0003DMG400021818,PGSC0003DMG400022502
GO:0006473	protein acetylation	biological_process	0.19078	1	4	2644	25	29181	PGSC0003DMG400026382,PGSC0003DMG400015213,PGSC0003DMG400031145,PGSC0003DMG400012286
GO:0006475	internal protein amino acid acetylation	biological_process	0.19078	1	4	2644	25	29181	PGSC0003DMG400026382,PGSC0003DMG400012286,PGSC0003DMG400015213,PGSC0003DMG400031145
GO:0018393	internal peptidyl-lysine acetylation	biological_process	0.19078	1	4	2644	25	29181	PGSC0003DMG400026382,PGSC0003DMG400012286,PGSC0003DMG400031145,PGSC0003DMG400015213
GO:0018394	peptidyl-lysine acetylation	biological_process	0.19078	1	4	2644	25	29181	PGSC0003DMG400026382,PGSC0003DMG400012286,PGSC0003DMG400015213,PGSC0003DMG400031145
GO:0043543	protein acylation	biological_process	0.19078	1	4	2644	25	29181	PGSC0003DMG400026382,PGSC0003DMG400012286,PGSC0003DMG400015213,PGSC0003DMG400031145
GO:0032990	cell part morphogenesis	biological_process	0.19115	1	10	2644	74	29181	PGSC0003DMG400027523,PGSC0003DMG400016293,PGSC0003DMG400011541,PGSC0003DMG400022888,PGSC0003DMG400008956,PGSC0003DMG400010097,PGSC0003DMG400003756,PGSC0003DMG400022225,PGSC0003DMG400001433,PGSC0003DMG400021563
GO:0048858	cell projection morphogenesis	biological_process	0.19115	1	10	2644	74	29181	PGSC0003DMG400021563,PGSC0003DMG400001433,PGSC0003DMG400022225,PGSC0003DMG400003756,PGSC0003DMG400010097,PGSC0003DMG400008956,PGSC0003DMG400022888,PGSC0003DMG400011541,PGSC0003DMG400027523,PGSC0003DMG400016293
GO:0030244	cellulose biosynthetic process	biological_process	0.1912	1	9	2644	63	29181	PGSC0003DMG400002396,PGSC0003DMG401003156,PGSC0003DMG400029938,PGSC0003DMG400029348,PGSC0003DMG400012852,PGSC0003DMG400003067,PGSC0003DMG400024627,Novel03255,PGSC0003DMG400010794
GO:0000103	sulfate assimilation	biological_process	0.19164	1	8	2644	54	29181	PGSC0003DMG400006157,PGSC0003DMG400003089,PGSC0003DMG400013514,PGSC0003DMG400023506,PGSC0003DMG400023663,PGSC0003DMG400016553,PGSC0003DMG400003889,PGSC0003DMG400028925
GO:0004020	adenylylsulfate kinase activity	molecular_function	0.19164	1	8	2644	54	29181	PGSC0003DMG400023506,PGSC0003DMG400013514,PGSC0003DMG400006157,PGSC0003DMG400003089,PGSC0003DMG400028925,PGSC0003DMG400003889,PGSC0003DMG400023663,PGSC0003DMG400016553
GO:0007276	gamete generation	biological_process	0.19327	1	15	2644	124	29181	PGSC0003DMG400000723,PGSC0003DMG400006088,PGSC0003DMG400015575,PGSC0003DMG400025750,PGSC0003DMG400012966,PGSC0003DMG400021163,PGSC0003DMG400030902,PGSC0003DMG400008004,PGSC0003DMG400007581,PGSC0003DMG400006160,PGSC0003DMG400030918,PGSC0003DMG400030496,PGSC0003DMG400002613,PGSC0003DMG400030474,PGSC0003DMG400030337
GO:0015232	heme transporter activity	molecular_function	0.19407	1	5	2644	34	29181	PGSC0003DMG400017020,PGSC0003DMG400024754,PGSC0003DMG400012569,PGSC0003DMG400016649,PGSC0003DMG400006022
GO:0016835	carbon-oxygen lyase activity	molecular_function	0.19472	1	40	2644	364	29181	PGSC0003DMG400007122,PGSC0003DMG400014543,PGSC0003DMG401024074,PGSC0003DMG400005339,PGSC0003DMG400007849,PGSC0003DMG400030454,Novel00385,PGSC0003DMG400016285,PGSC0003DMG400008551,PGSC0003DMG400026536,PGSC0003DMG400025384,PGSC0003DMG400028406,PGSC0003DMG400001206,PGSC0003DMG400010444,PGSC0003DMG400022500,PGSC0003DMG400000376,PGSC0003DMG400005284,PGSC0003DMG400005595,PGSC0003DMG400014600,PGSC0003DM…
GO:0016759	cellulose synthase activity	molecular_function	0.19538	1	7	2644	46	29181	PGSC0003DMG400002396,PGSC0003DMG401003156,PGSC0003DMG400012852,PGSC0003DMG400003067,PGSC0003DMG400029348,Novel03255,PGSC0003DMG400010794
GO:0016760	cellulose synthase (UDP-forming) activity	molecular_function	0.19538	1	7	2644	46	29181	PGSC0003DMG400029348,Novel03255,PGSC0003DMG400010794,PGSC0003DMG400003067,PGSC0003DMG400002396,PGSC0003DMG401003156,PGSC0003DMG400012852
GO:0046782	regulation of viral transcription	biological_process	0.19558	1	4	2644	25	29181	PGSC0003DMG400004274,PGSC0003DMG400020364,PGSC0003DMG402007406,PGSC0003DMG400011015
GO:1903900	regulation of viral life cycle	biological_process	0.19558	1	4	2644	25	29181	PGSC0003DMG400011015,PGSC0003DMG402007406,PGSC0003DMG400004274,PGSC0003DMG400020364
GO:0008948	oxaloacetate decarboxylase activity	molecular_function	0.19718	1	6	2644	46	29181	PGSC0003DMG402031322,PGSC0003DMG400021307,PGSC0003DMG400011937,PGSC0003DMG400003340,PGSC0003DMG400013474,PGSC0003DMG400030134
GO:0035725	sodium ion transmembrane transport	biological_process	0.19718	1	6	2644	46	29181	PGSC0003DMG400003340,PGSC0003DMG400030134,PGSC0003DMG400013474,PGSC0003DMG400011937,PGSC0003DMG400021307,PGSC0003DMG402031322
GO:0071436	sodium ion export	biological_process	0.19718	1	6	2644	46	29181	PGSC0003DMG400003340,PGSC0003DMG400030134,PGSC0003DMG400013474,PGSC0003DMG400011937,PGSC0003DMG402031322,PGSC0003DMG400021307
GO:0020002	host cell plasma membrane	cellular_component	0.19754	1	1	2644	3	29181	PGSC0003DMG400017561
GO:0044156	host cell junction	cellular_component	0.19754	1	1	2644	3	29181	PGSC0003DMG400017561
GO:0006094	gluconeogenesis	biological_process	0.19807	1	6	2644	42	29181	PGSC0003DMG400025171,PGSC0003DMG400019719,PGSC0003DMG402014514,PGSC0003DMG400012910,PGSC0003DMG400030453,PGSC0003DMG400006391
GO:0019319	hexose biosynthetic process	biological_process	0.19807	1	6	2644	42	29181	PGSC0003DMG400006391,PGSC0003DMG402014514,PGSC0003DMG400012910,PGSC0003DMG400030453,PGSC0003DMG400019719,PGSC0003DMG400025171
GO:0046364	monosaccharide biosynthetic process	biological_process	0.19807	1	6	2644	42	29181	PGSC0003DMG400025171,PGSC0003DMG400019719,PGSC0003DMG402014514,PGSC0003DMG400012910,PGSC0003DMG400030453,PGSC0003DMG400006391
GO:0006644	phospholipid metabolic process	biological_process	0.19836	1	40	2644	361	29181	Novel02831,PGSC0003DMG400008568,PGSC0003DMG400015749,PGSC0003DMG400008472,PGSC0003DMG400016649,PGSC0003DMG400001580,PGSC0003DMG401031070,PGSC0003DMG400033029,PGSC0003DMG400022370,PGSC0003DMG400017627,PGSC0003DMG400007965,PGSC0003DMG400023321,PGSC0003DMG400021558,PGSC0003DMG402023631,PGSC0003DMG400002291,PGSC0003DMG400022026,PGSC0003DMG400009405,PGSC0003DMG400022911,PGSC0003DMG400003509,PGSC0003DM…
GO:0032271	regulation of protein polymerization	biological_process	0.19867	1	9	2644	68	29181	PGSC0003DMG400026042,Novel01446,PGSC0003DMG400022318,PGSC0003DMG400031813,PGSC0003DMG401012339,PGSC0003DMG400009883,PGSC0003DMG402004570,PGSC0003DMG400001549,PGSC0003DMG400013816
GO:0043254	regulation of protein complex assembly	biological_process	0.19867	1	9	2644	68	29181	PGSC0003DMG400013816,PGSC0003DMG402004570,PGSC0003DMG400009883,PGSC0003DMG400001549,PGSC0003DMG400022318,Novel01446,PGSC0003DMG400031813,PGSC0003DMG401012339,PGSC0003DMG400026042
GO:0051181	cofactor transport	biological_process	0.19963	1	10	2644	79	29181	PGSC0003DMG400012569,PGSC0003DMG400021039,PGSC0003DMG400017020,PGSC0003DMG400001965,PGSC0003DMG400016803,PGSC0003DMG400001042,PGSC0003DMG400016649,PGSC0003DMG400024754,PGSC0003DMG400016159,PGSC0003DMG400006022
GO:0006826	iron ion transport	biological_process	0.20095	1	16	2644	125	29181	PGSC0003DMG402003705,PGSC0003DMG400024909,PGSC0003DMG400028422,PGSC0003DMG400014512,PGSC0003DMG402002542,PGSC0003DMG400010869,PGSC0003DMG401029631,PGSC0003DMG402007810,PGSC0003DMG400025035,PGSC0003DMG400006378,PGSC0003DMG401013112,PGSC0003DMG400017824,PGSC0003DMG400030630,PGSC0003DMG400012984,PGSC0003DMG400013442,PGSC0003DMG400009401
GO:0044427	chromosomal part	cellular_component	0.2015	1	63	2644	613	29181	Novel00804,PGSC0003DMG400024511,PGSC0003DMG400006622,PGSC0003DMG400028633,PGSC0003DMG400025117,PGSC0003DMG400007199,PGSC0003DMG400028145,PGSC0003DMG400021717,PGSC0003DMG400022063,PGSC0003DMG400000227,PGSC0003DMG400022164,Novel01257,PGSC0003DMG400019910,PGSC0003DMG400009363,PGSC0003DMG400030470,Novel01916,PGSC0003DMG400030432,PGSC0003DMG400009955,PGSC0003DMG400007849,PGSC0003DMG400010246,PGSC0003D…
GO:0008839	4-hydroxy-tetrahydrodipicolinate reductase	molecular_function	0.20241	1	7	2644	48	29181	PGSC0003DMG400032250,PGSC0003DMG400004800,PGSC0003DMG400029938,PGSC0003DMG400000404,PGSC0003DMG400027735,PGSC0003DMG400003755,PGSC0003DMG400015379
GO:0019220	regulation of phosphate metabolic process	biological_process	0.20346	1	8	2644	60	29181	PGSC0003DMG400011246,PGSC0003DMG400002852,PGSC0003DMG400027771,PGSC0003DMG400018119,PGSC0003DMG400007819,PGSC0003DMG400020383,PGSC0003DMG400022507,PGSC0003DMG400009051
GO:0051174	regulation of phosphorus metabolic process	biological_process	0.20346	1	8	2644	60	29181	PGSC0003DMG400018119,PGSC0003DMG400007819,PGSC0003DMG400027771,PGSC0003DMG400011246,PGSC0003DMG400002852,PGSC0003DMG400022507,PGSC0003DMG400009051,PGSC0003DMG400020383
GO:0008519	ammonium transmembrane transporter activity	molecular_function	0.20365	1	5	2644	32	29181	PGSC0003DMG400016891,PGSC0003DMG400028137,PGSC0003DMG400001508,PGSC0003DMG400030453,PGSC0003DMG401015894
GO:0045132	meiotic chromosome segregation	biological_process	0.20366	1	7	2644	49	29181	PGSC0003DMG400028633,PGSC0003DMG400022164,PGSC0003DMG400000227,PGSC0003DMG400022063,PGSC0003DMG400011655,PGSC0003DMG400016441,PGSC0003DMG400015015
GO:0004022	alcohol dehydrogenase (NAD) activity	molecular_function	0.20389	1	1	2644	2	29181	PGSC0003DMG400010415
GO:0015945	methanol metabolic process	biological_process	0.20389	1	1	2644	2	29181	PGSC0003DMG400010415
GO:0015946	methanol oxidation	biological_process	0.20389	1	1	2644	2	29181	PGSC0003DMG400010415
GO:0034308	primary alcohol metabolic process	biological_process	0.20389	1	1	2644	2	29181	PGSC0003DMG400010415
GO:0008488	gamma-glutamyl carboxylase activity	molecular_function	0.20407	1	2	2644	8	29181	PGSC0003DMG400026303,PGSC0003DMG402008890
GO:0017187	peptidyl-glutamic acid carboxylation	biological_process	0.20407	1	2	2644	8	29181	PGSC0003DMG402008890,PGSC0003DMG400026303
GO:0018200	peptidyl-glutamic acid modification	biological_process	0.20407	1	2	2644	8	29181	PGSC0003DMG402008890,PGSC0003DMG400026303
GO:0018214	protein carboxylation	biological_process	0.20407	1	2	2644	8	29181	PGSC0003DMG402008890,PGSC0003DMG400026303
GO:0017048	Rho GTPase binding	molecular_function	0.20467	1	3	2644	16	29181	PGSC0003DMG400011768,PGSC0003DMG400003036,PGSC0003DMG400007614
GO:0016778	diphosphotransferase activity	molecular_function	0.20479	1	4	2644	26	29181	PGSC0003DMG401011372,PGSC0003DMG400025055,PGSC0003DMG400017151,PGSC0003DMG400024226
GO:0004375	glycine dehydrogenase (decarboxylating) activity	molecular_function	0.20555	1	1	2644	2	29181	PGSC0003DMG400029938
GO:0006546	glycine catabolic process	biological_process	0.20555	1	1	2644	2	29181	PGSC0003DMG400029938
GO:0009071	serine family amino acid catabolic process	biological_process	0.20555	1	1	2644	2	29181	PGSC0003DMG400029938
GO:0016642	oxidoreductase activity, acting on the CH-NH2 group of donors, disulfide as acceptor	molecular_function	0.20555	1	1	2644	2	29181	PGSC0003DMG400029938
GO:0031324	negative regulation of cellular metabolic process	biological_process	0.20612	1	28	2644	245	29181	PGSC0003DMG400018119,PGSC0003DMG400008945,PGSC0003DMG400014854,PGSC0003DMG400001326,PGSC0003DMG401004603,PGSC0003DMG400022507,PGSC0003DMG400022405,PGSC0003DMG400027269,PGSC0003DMG400001566,PGSC0003DMG400001100,PGSC0003DMG400003213,PGSC0003DMG400007150,PGSC0003DMG400005577,PGSC0003DMG400007819,PGSC0003DMG400014901,PGSC0003DMG401013112,PGSC0003DMG400015575,PGSC0003DMG400027771,PGSC0003DMG400022343,…
GO:0004057	arginyltransferase activity	molecular_function	0.20685	1	3	2644	15	29181	PGSC0003DMG400015434,PGSC0003DMG400002613,PGSC0003DMG400005668
GO:0016598	protein arginylation	biological_process	0.20685	1	3	2644	15	29181	PGSC0003DMG400005668,PGSC0003DMG400002613,PGSC0003DMG400015434
GO:0046165	alcohol biosynthetic process	biological_process	0.20723	1	3	2644	17	29181	PGSC0003DMG400016878,PGSC0003DMG400003792,PGSC0003DMG400010076
GO:0002429	immune response-activating cell surface receptor signaling pathway	biological_process	0.20866	1	4	2644	25	29181	PGSC0003DMG400011246,PGSC0003DMG400000421,PGSC0003DMG400027086,PGSC0003DMG400009900
GO:0002757	immune response-activating signal transduction	biological_process	0.20866	1	4	2644	25	29181	PGSC0003DMG400027086,PGSC0003DMG400000421,PGSC0003DMG400009900,PGSC0003DMG400011246
GO:0002768	immune response-regulating cell surface receptor signaling pathway	biological_process	0.20866	1	4	2644	25	29181	PGSC0003DMG400011246,PGSC0003DMG400009900,PGSC0003DMG400027086,PGSC0003DMG400000421
GO:0050851	antigen receptor-mediated signaling pathway	biological_process	0.20866	1	4	2644	25	29181	PGSC0003DMG400009900,PGSC0003DMG400027086,PGSC0003DMG400000421,PGSC0003DMG400011246
GO:0044702	single organism reproductive process	biological_process	0.20884	1	22	2644	195	29181	PGSC0003DMG400020622,PGSC0003DMG400021163,PGSC0003DMG400012966,PGSC0003DMG400006088,PGSC0003DMG400025750,PGSC0003DMG400007199,PGSC0003DMG400021676,PGSC0003DMG400030902,PGSC0003DMG400020158,PGSC0003DMG400015575,PGSC0003DMG400023833,PGSC0003DMG400000723,PGSC0003DMG400030337,PGSC0003DMG400030474,PGSC0003DMG400002613,PGSC0003DMG400030496,PGSC0003DMG400030918,PGSC0003DMG400006160,PGSC0003DMG400007581,…
GO:0006730	one-carbon metabolic process	biological_process	0.20896	1	3	2644	18	29181	PGSC0003DMG400004572,PGSC0003DMG400000376,PGSC0003DMG400001528
GO:0098533	ATPase dependent transmembrane transport complex	cellular_component	0.20936	1	4	2644	25	29181	PGSC0003DMG400029915,PGSC0003DMG401028367,PGSC0003DMG400011721,PGSC0003DMG402024734
GO:1904564	Nbp35-Cfd1 ATPase complex	cellular_component	0.20936	1	4	2644	25	29181	PGSC0003DMG401028367,PGSC0003DMG400011721,PGSC0003DMG400029915,PGSC0003DMG402024734
GO:0004788	thiamine diphosphokinase activity	molecular_function	0.21053	1	2	2644	10	29181	PGSC0003DMG400017151,PGSC0003DMG401011372
GO:0006813	potassium ion transport	biological_process	0.21209	1	25	2644	218	29181	PGSC0003DMG400004800,PGSC0003DMG400023512,Novel02732,PGSC0003DMG400001780,PGSC0003DMG400014467,Novel03619,PGSC0003DMG400022618,PGSC0003DMG400027735,PGSC0003DMG400005284,PGSC0003DMG401004716,PGSC0003DMG401028367,PGSC0003DMG402001978,PGSC0003DMG400000404,PGSC0003DMG400008936,PGSC0003DMG400005886,PGSC0003DMG400003993,PGSC0003DMG402023929,PGSC0003DMG401021138,Novel01055,PGSC0003DMG400029362,PGSC0003D…
GO:0003953	NAD+ nucleosidase activity	molecular_function	0.21292	1	1	2644	2	29181	PGSC0003DMG401017657
GO:0004366	glycerol-3-phosphate O-acyltransferase activity	molecular_function	0.21293	1	1	2644	2	29181	PGSC0003DMG400027951
GO:0031221	arabinan metabolic process	biological_process	0.21293	1	1	2644	2	29181	PGSC0003DMG400018544
GO:0007016	cytoskeletal anchoring at plasma membrane	biological_process	0.21398	1	4	2644	25	29181	PGSC0003DMG400028904,Novel01650,PGSC0003DMG400030474,PGSC0003DMG400029948
GO:0050151	oleate hydratase activity	molecular_function	0.21403	1	2	2644	8	29181	PGSC0003DMG400025098,PGSC0003DMG401024074
GO:0009306	protein secretion	biological_process	0.21512	1	17	2644	140	29181	PGSC0003DMG400030455,PGSC0003DMG402000722,PGSC0003DMG400026794,PGSC0003DMG400012760,PGSC0003DMG402005074,PGSC0003DMG400007463,Novel01689,PGSC0003DMG400009925,PGSC0003DMG401023118,Novel02599,PGSC0003DMG400022311,PGSC0003DMG400030454,PGSC0003DMG400018792,PGSC0003DMG400029591,PGSC0003DMG400026074,PGSC0003DMG400004696,PGSC0003DMG400008537
GO:0006721	terpenoid metabolic process	biological_process	0.21603	1	14	2644	110	29181	PGSC0003DMG400005886,PGSC0003DMG402001978,PGSC0003DMG400002921,PGSC0003DMG400022026,PGSC0003DMG402013561,PGSC0003DMG400030454,PGSC0003DMG400014901,PGSC0003DMG400027156,PGSC0003DMG400024860,PGSC0003DMG400012185,PGSC0003DMG400011238,PGSC0003DMG400004608,Novel00910,PGSC0003DMG400026225
GO:0016114	terpenoid biosynthetic process	biological_process	0.21603	1	14	2644	110	29181	PGSC0003DMG400022026,PGSC0003DMG400002921,PGSC0003DMG400005886,PGSC0003DMG402001978,PGSC0003DMG402013561,PGSC0003DMG400024860,PGSC0003DMG400027156,PGSC0003DMG400030454,PGSC0003DMG400014901,PGSC0003DMG400026225,Novel00910,PGSC0003DMG400004608,PGSC0003DMG400012185,PGSC0003DMG400011238
GO:0019538	protein metabolic process	biological_process	0.21628	1	566	2644	5730	29181	PGSC0003DMG400008256,PGSC0003DMG400019347,PGSC0003DMG400012133,PGSC0003DMG400021091,Novel00490,PGSC0003DMG400041402,PGSC0003DMG400003537,PGSC0003DMG400012997,Novel01717,PGSC0003DMG402010623,PGSC0003DMG400009956,PGSC0003DMG400004401,PGSC0003DMG400015276,PGSC0003DMG400022200,PGSC0003DMG400026384,PGSC0003DMG402019416,PGSC0003DMG400011132,PGSC0003DMG400003707,PGSC0003DMG402014186,PGSC0003DMG400001066…
GO:0016788	hydrolase activity, acting on ester bonds	molecular_function	0.21666	1	199	2644	1974	29181	PGSC0003DMG400026494,PGSC0003DMG400006622,PGSC0003DMG401016495,PGSC0003DMG400022911,PGSC0003DMG400025672,PGSC0003DMG400024226,PGSC0003DMG400019913,PGSC0003DMG400024591,PGSC0003DMG400001566,PGSC0003DMG400015230,PGSC0003DMG400025814,Novel01580,PGSC0003DMG400033029,PGSC0003DMG400020365,PGSC0003DMG400021596,Novel01884,PGSC0003DMG400022183,PGSC0003DMG400008271,PGSC0003DMG400007505,PGSC0003DMG400009040…
GO:0007172	signal complex assembly	biological_process	0.2168	1	2	2644	10	29181	PGSC0003DMG400007462,PGSC0003DMG400024596
GO:0016832	aldehyde-lyase activity	molecular_function	0.217	1	6	2644	42	29181	PGSC0003DMG400002675,PGSC0003DMG400002612,PGSC0003DMG400030121,PGSC0003DMG400029645,PGSC0003DMG400026456,PGSC0003DMG400007019
GO:0051188	cofactor biosynthetic process	biological_process	0.21715	1	53	2644	490	29181	PGSC0003DMG400022268,Novel03619,PGSC0003DMG400010485,Novel01240,Novel00931,PGSC0003DMG400028287,PGSC0003DMG402018143,PGSC0003DMG400023663,Novel03103,PGSC0003DMG400006594,PGSC0003DMG400005246,PGSC0003DMG401021138,PGSC0003DMG402028101,PGSC0003DMG400018665,PGSC0003DMG401029222,PGSC0003DMG401011372,PGSC0003DMG402001978,PGSC0003DMG400022405,PGSC0003DMG400007288,PGSC0003DMG400023975,PGSC0003DMG40001715…
GO:0070070	proton-transporting V-type ATPase complex assembly	biological_process	0.21745	1	4	2644	28	29181	PGSC0003DMG400026155,PGSC0003DMG400014183,PGSC0003DMG400000090,PGSC0003DMG400008141
GO:0070072	vacuolar proton-transporting V-type ATPase complex assembly	biological_process	0.21745	1	4	2644	28	29181	PGSC0003DMG400026155,PGSC0003DMG400014183,PGSC0003DMG400008141,PGSC0003DMG400000090
GO:0009887	organ morphogenesis	biological_process	0.21757	1	2	2644	11	29181	PGSC0003DMG400018583,PGSC0003DMG400010092
GO:0042475	odontogenesis of dentin-containing tooth	biological_process	0.21757	1	2	2644	11	29181	PGSC0003DMG400010092,PGSC0003DMG400018583
GO:0042476	odontogenesis	biological_process	0.21757	1	2	2644	11	29181	PGSC0003DMG400018583,PGSC0003DMG400010092
GO:0009898	cytoplasmic side of plasma membrane	cellular_component	0.21793	1	4	2644	27	29181	PGSC0003DMG400032814,PGSC0003DMG400015211,PGSC0003DMG400021373,PGSC0003DMG400030259
GO:0098552	side of membrane	cellular_component	0.21793	1	4	2644	27	29181	PGSC0003DMG400032814,PGSC0003DMG400021373,PGSC0003DMG400015211,PGSC0003DMG400030259
GO:0098562	cytoplasmic side of membrane	cellular_component	0.21793	1	4	2644	27	29181	PGSC0003DMG400030259,PGSC0003DMG400021373,PGSC0003DMG400015211,PGSC0003DMG400032814
GO:0035257	nuclear hormone receptor binding	molecular_function	0.21841	1	3	2644	16	29181	PGSC0003DMG400011687,PGSC0003DMG400012087,PGSC0003DMG400029466
GO:0051427	hormone receptor binding	molecular_function	0.21841	1	3	2644	16	29181	PGSC0003DMG400011687,PGSC0003DMG400029466,PGSC0003DMG400012087
GO:0000975	regulatory region DNA binding	molecular_function	0.21865	1	3	2644	18	29181	PGSC0003DMG400004746,PGSC0003DMG400004285,PGSC0003DMG400031267
GO:0001067	regulatory region nucleic acid binding	molecular_function	0.21865	1	3	2644	18	29181	PGSC0003DMG400031267,PGSC0003DMG400004285,PGSC0003DMG400004746
GO:0042398	cellular modified amino acid biosynthetic process	biological_process	0.21887	1	14	2644	114	29181	PGSC0003DMG402028101,PGSC0003DMG400006021,PGSC0003DMG400004572,PGSC0003DMG400006382,PGSC0003DMG400018793,PGSC0003DMG400023608,PGSC0003DMG400002011,PGSC0003DMG400022200,Novel01240,PGSC0003DMG400011038,PGSC0003DMG400028287,PGSC0003DMG400017627,PGSC0003DMG400004374,PGSC0003DMG400037250
GO:0098800	inner mitochondrial membrane protein complex	cellular_component	0.21915	1	32	2644	300	29181	PGSC0003DMG400028214,PGSC0003DMG400012616,PGSC0003DMG400015276,PGSC0003DMG400016918,PGSC0003DMG402031322,PGSC0003DMG400000421,PGSC0003DMG400008751,PGSC0003DMG400030941,PGSC0003DMG400015405,PGSC0003DMG400023039,PGSC0003DMG400000301,PGSC0003DMG400025035,PGSC0003DMG400018763,PGSC0003DMG400002690,PGSC0003DMG400020819,PGSC0003DMG400030560,PGSC0003DMG400025747,PGSC0003DMG400026323,PGSC0003DMG401011681,…
GO:0044743	intracellular protein transmembrane import	biological_process	0.21955	1	10	2644	82	29181	PGSC0003DMG400013894,PGSC0003DMG400024615,Novel03389,PGSC0003DMG400028374,PGSC0003DMG400007597,PGSC0003DMG400033637,PGSC0003DMG400029803,PGSC0003DMG400016015,Novel01580,PGSC0003DMG400030630
GO:0065002	intracellular protein transmembrane transport	biological_process	0.21955	1	10	2644	82	29181	PGSC0003DMG400007597,PGSC0003DMG400028374,PGSC0003DMG400024615,Novel03389,PGSC0003DMG400013894,PGSC0003DMG400033637,Novel01580,PGSC0003DMG400030630,PGSC0003DMG400029803,PGSC0003DMG400016015
GO:0030001	metal ion transport	biological_process	0.22089	1	92	2644	903	29181	PGSC0003DMG400012516,PGSC0003DMG400014843,PGSC0003DMG400012559,PGSC0003DMG400000385,Novel02243,PGSC0003DMG400001419,PGSC0003DMG400030701,PGSC0003DMG402008889,PGSC0003DMG400012418,PGSC0003DMG400033054,PGSC0003DMG400028145,PGSC0003DMG400014512,PGSC0003DMG400028422,PGSC0003DMG400005886,PGSC0003DMG400027168,PGSC0003DMG400030882,PGSC0003DMG400025035,PGSC0003DMG401004716,PGSC0003DMG402002542,PGSC0003DM…
GO:0030435	sporulation resulting in formation of a cellular spore	biological_process	0.22121	1	5	2644	34	29181	PGSC0003DMG400013924,PGSC0003DMG400027188,PGSC0003DMG400015477,PGSC0003DMG400025866,PGSC0003DMG400010999
GO:0001932	regulation of protein phosphorylation	biological_process	0.22166	1	5	2644	34	29181	PGSC0003DMG400022507,PGSC0003DMG400009051,PGSC0003DMG400007819,PGSC0003DMG400027771,PGSC0003DMG400002852
GO:0019001	guanyl nucleotide binding	molecular_function	0.22277	1	89	2644	817	29181	PGSC0003DMG400013514,PGSC0003DMG400011810,PGSC0003DMG400022268,PGSC0003DMG400008659,PGSC0003DMG402023433,PGSC0003DMG400019719,PGSC0003DMG400006594,PGSC0003DMG400016607,PGSC0003DMG400012984,PGSC0003DMG400025931,PGSC0003DMG400027893,PGSC0003DMG400014624,PGSC0003DMG400017824,PGSC0003DMG400020828,PGSC0003DMG400021039,PGSC0003DMG400007295,PGSC0003DMG400028925,PGSC0003DMG400003122,PGSC0003DMG400029753,…
GO:0008661	1-deoxy-D-xylulose-5-phosphate synthase activity	molecular_function	0.22316	1	3	2644	16	29181	PGSC0003DMG400002921,PGSC0003DMG400024860,PGSC0003DMG402013561
GO:0016744	transferase activity, transferring aldehyde or ketonic groups	molecular_function	0.22316	1	3	2644	16	29181	PGSC0003DMG402013561,PGSC0003DMG400002921,PGSC0003DMG400024860
GO:0030182	neuron differentiation	biological_process	0.22336	1	9	2644	67	29181	PGSC0003DMG400003756,PGSC0003DMG402030499,PGSC0003DMG400022225,PGSC0003DMG400020133,PGSC0003DMG400021563,PGSC0003DMG400016293,PGSC0003DMG400027523,PGSC0003DMG400011541,PGSC0003DMG400010097
GO:0048699	generation of neurons	biological_process	0.22336	1	9	2644	67	29181	PGSC0003DMG400010097,PGSC0003DMG400016293,PGSC0003DMG400027523,PGSC0003DMG400011541,PGSC0003DMG400021563,PGSC0003DMG400003756,PGSC0003DMG400022225,PGSC0003DMG402030499,PGSC0003DMG400020133
GO:0008320	protein transmembrane transporter activity	molecular_function	0.2238	1	2	2644	9	29181	PGSC0003DMG400012760,PGSC0003DMG402000722
GO:0015450	P-P-bond-hydrolysis-driven protein transmembrane transporter activity	molecular_function	0.2238	1	2	2644	9	29181	PGSC0003DMG402000722,PGSC0003DMG400012760
GO:0015078	hydrogen ion transmembrane transporter activity	molecular_function	0.22493	1	69	2644	701	29181	PGSC0003DMG402031322,PGSC0003DMG400012616,PGSC0003DMG400006405,PGSC0003DMG400026069,PGSC0003DMG400023697,PGSC0003DMG402018143,PGSC0003DMG402030815,PGSC0003DMG400021264,PGSC0003DMG400022318,PGSC0003DMG400011322,PGSC0003DMG400011391,PGSC0003DMG400015711,PGSC0003DMG400023039,PGSC0003DMG401009709,PGSC0003DMG400002944,PGSC0003DMG400009456,PGSC0003DMG400011168,Novel01261,PGSC0003DMG400002690,PGSC0003DM…
GO:0009399	nitrogen fixation	biological_process	0.22557	1	6	2644	42	29181	PGSC0003DMG400007059,PGSC0003DMG400014442,PGSC0003DMG400024310,PGSC0003DMG400029061,PGSC0003DMG400027014,PGSC0003DMG400020361
GO:0015128	gluconate transmembrane transporter activity	molecular_function	0.22623	1	2	2644	9	29181	PGSC0003DMG400009074,PGSC0003DMG400013282
GO:0042873	aldonate transport	biological_process	0.22623	1	2	2644	9	29181	PGSC0003DMG400013282,PGSC0003DMG400009074
GO:0042879	aldonate transmembrane transporter activity	molecular_function	0.22623	1	2	2644	9	29181	PGSC0003DMG400009074,PGSC0003DMG400013282
GO:0034212	peptide N-acetyltransferase activity	molecular_function	0.22675	1	6	2644	42	29181	PGSC0003DMG400016395,PGSC0003DMG401026984,PGSC0003DMG400031145,PGSC0003DMG400015229,PGSC0003DMG400015213,PGSC0003DMG400000729
GO:0061733	peptide-lysine-N-acetyltransferase activity	molecular_function	0.22675	1	6	2644	42	29181	PGSC0003DMG401026984,PGSC0003DMG400016395,PGSC0003DMG400000729,PGSC0003DMG400015229,PGSC0003DMG400031145,PGSC0003DMG400015213
GO:0010638	positive regulation of organelle organization	biological_process	0.22749	1	6	2644	44	29181	PGSC0003DMG400031813,PGSC0003DMG400013816,PGSC0003DMG401012339,PGSC0003DMG400001549,PGSC0003DMG400026042,PGSC0003DMG402004570
GO:0019915	lipid storage	biological_process	0.22871	1	4	2644	27	29181	PGSC0003DMG400003417,PGSC0003DMG400002190,PGSC0003DMG400024081,PGSC0003DMG400012543
GO:0009262	deoxyribonucleotide metabolic process	biological_process	0.23019	1	7	2644	54	29181	PGSC0003DMG400021818,PGSC0003DMG400022200,PGSC0003DMG400022502,PGSC0003DMG400003803,PGSC0003DMG400020618,PGSC0003DMG400008676,PGSC0003DMG400002932
GO:0017080	sodium channel regulator activity	molecular_function	0.23032	1	9	2644	71	29181	PGSC0003DMG402018777,PGSC0003DMG400021091,PGSC0003DMG400014163,PGSC0003DMG400020443,PGSC0003DMG400028238,PGSC0003DMG400022026,PGSC0003DMG400030229,PGSC0003DMG400023340,PGSC0003DMG400031755
GO:0019871	sodium channel inhibitor activity	molecular_function	0.23032	1	9	2644	71	29181	PGSC0003DMG400014163,PGSC0003DMG400020443,PGSC0003DMG400021091,PGSC0003DMG402018777,PGSC0003DMG400031755,PGSC0003DMG400023340,PGSC0003DMG400022026,PGSC0003DMG400028238,PGSC0003DMG400030229
GO:0000794	condensed nuclear chromosome	cellular_component	0.2306	1	27	2644	251	29181	PGSC0003DMG400021331,PGSC0003DMG400009823,PGSC0003DMG400025117,PGSC0003DMG400028633,PGSC0003DMG400016529,PGSC0003DMG400014013,PGSC0003DMG400009822,PGSC0003DMG400014010,PGSC0003DMG400000227,PGSC0003DMG400004439,PGSC0003DMG400022063,PGSC0003DMG400015015,PGSC0003DMG400028145,PGSC0003DMG400001057,PGSC0003DMG401024899,PGSC0003DMG400007849,PGSC0003DMG402012803,PGSC0003DMG400000173,PGSC0003DMG400000896,…
GO:0019605	butyrate metabolic process	biological_process	0.23146	1	1	2644	3	29181	PGSC0003DMG400001684
GO:0046459	short-chain fatty acid metabolic process	biological_process	0.23146	1	1	2644	3	29181	PGSC0003DMG400001684
GO:0047989	hydroxybutyrate-dimer hydrolase activity	molecular_function	0.23146	1	1	2644	3	29181	PGSC0003DMG400001684
GO:0030243	cellulose metabolic process	biological_process	0.23199	1	10	2644	77	29181	PGSC0003DMG400020321,PGSC0003DMG400029348,PGSC0003DMG400002396,PGSC0003DMG401003156,PGSC0003DMG400029938,PGSC0003DMG400024627,PGSC0003DMG400003067,Novel03255,PGSC0003DMG400010794,PGSC0003DMG400012852
GO:0005811	lipid particle	cellular_component	0.23397	1	3	2644	20	29181	PGSC0003DMG400007908,PGSC0003DMG400015169,PGSC0003DMG400002204
GO:0012511	monolayer-surrounded lipid storage body	cellular_component	0.23397	1	3	2644	20	29181	PGSC0003DMG400002204,PGSC0003DMG400015169,PGSC0003DMG400007908
GO:0005247	voltage-gated chloride channel activity	molecular_function	0.23399	1	4	2644	25	29181	PGSC0003DMG400031145,PGSC0003DMG400002730,PGSC0003DMG400024904,PGSC0003DMG402031322
GO:0005254	chloride channel activity	molecular_function	0.23399	1	4	2644	25	29181	PGSC0003DMG400031145,PGSC0003DMG400024904,PGSC0003DMG400002730,PGSC0003DMG402031322
GO:0008308	voltage-gated anion channel activity	molecular_function	0.23399	1	4	2644	25	29181	PGSC0003DMG402031322,PGSC0003DMG400031145,PGSC0003DMG400024904,PGSC0003DMG400002730
GO:0015108	chloride transmembrane transporter activity	molecular_function	0.23399	1	4	2644	25	29181	PGSC0003DMG402031322,PGSC0003DMG400024904,PGSC0003DMG400002730,PGSC0003DMG400031145
GO:0010605	negative regulation of macromolecule metabolic process	biological_process	0.23448	1	31	2644	277	29181	PGSC0003DMG400001566,PGSC0003DMG400027269,PGSC0003DMG400003213,PGSC0003DMG400001100,PGSC0003DMG400028234,PGSC0003DMG400022405,PGSC0003DMG400022507,PGSC0003DMG400014854,PGSC0003DMG401004603,PGSC0003DMG400001326,PGSC0003DMG400001907,PGSC0003DMG400008945,PGSC0003DMG400018119,PGSC0003DMG400031371,PGSC0003DMG400030551,PGSC0003DMG400006815,PGSC0003DMG400028303,PGSC0003DMG400001854,PGSC0003DMG400008000,…
GO:0000813	ESCRT I complex	cellular_component	0.2345	1	2	2644	9	29181	PGSC0003DMG400001326,PGSC0003DMG400001382
GO:0032509	endosome transport via multivesicular body sorting pathway	biological_process	0.2345	1	2	2644	9	29181	PGSC0003DMG400001326,PGSC0003DMG400001382
GO:0036452	ESCRT complex	cellular_component	0.2345	1	2	2644	9	29181	PGSC0003DMG400001326,PGSC0003DMG400001382
GO:0004565	beta-galactosidase activity	molecular_function	0.23512	1	6	2644	41	29181	PGSC0003DMG400015211,PGSC0003DMG400003537,PGSC0003DMG400008553,PGSC0003DMG400006270,PGSC0003DMG400024060,PGSC0003DMG400001459
GO:0005576	extracellular region	cellular_component	0.23576	1	206	2644	2138	29181	PGSC0003DMG400006405,PGSC0003DMG400014024,PGSC0003DMG400015622,Novel00734,PGSC0003DMG400026393,PGSC0003DMG400012966,PGSC0003DMG400013977,PGSC0003DMG400024946,PGSC0003DMG400022318,PGSC0003DMG400015132,PGSC0003DMG400008437,Novel01717,PGSC0003DMG402018143,PGSC0003DMG400004972,PGSC0003DMG401023504,PGSC0003DMG400005540,PGSC0003DMG400007614,PGSC0003DMG400003266,PGSC0003DMG400032788,PGSC0003DMG400021091…
GO:0006760	folic acid-containing compound metabolic process	biological_process	0.23577	1	10	2644	81	29181	Novel01240,PGSC0003DMG400030121,PGSC0003DMG400002612,PGSC0003DMG400011038,PGSC0003DMG400030219,PGSC0003DMG400023608,PGSC0003DMG400018793,PGSC0003DMG400004572,PGSC0003DMG400026456,PGSC0003DMG402028101
GO:0009246	enterobacterial common antigen biosynthetic process	biological_process	0.23802	1	1	2644	3	29181	PGSC0003DMG402017902
GO:0036065	fucosylation	biological_process	0.23802	1	1	2644	3	29181	PGSC0003DMG402017902
GO:0046378	enterobacterial common antigen metabolic process	biological_process	0.23802	1	1	2644	3	29181	PGSC0003DMG402017902
GO:0000793	condensed chromosome	cellular_component	0.23834	1	32	2644	302	29181	PGSC0003DMG400011655,PGSC0003DMG400004374,PGSC0003DMG400001077,PGSC0003DMG401023644,PGSC0003DMG400000173,PGSC0003DMG402012803,PGSC0003DMG400001057,PGSC0003DMG401024899,PGSC0003DMG400015015,PGSC0003DMG400018509,PGSC0003DMG400004439,PGSC0003DMG400032195,PGSC0003DMG400016529,PGSC0003DMG400021331,PGSC0003DMG400016441,PGSC0003DMG400005494,PGSC0003DMG400000248,PGSC0003DMG400014148,PGSC0003DMG400019835,…
GO:0008677	2-dehydropantoate 2-reductase activity	molecular_function	0.2394	1	7	2644	50	29181	PGSC0003DMG400006765,PGSC0003DMG400025098,PGSC0003DMG400011238,Novel03619,PGSC0003DMG400012712,PGSC0003DMG401021138,PGSC0003DMG400033906
GO:0031023	microtubule organizing center organization	biological_process	0.23961	1	7	2644	59	29181	PGSC0003DMG400017350,PGSC0003DMG400023555,PGSC0003DMG400018921,PGSC0003DMG400027381,PGSC0003DMG400019835,PGSC0003DMG400024754,PGSC0003DMG400011322
GO:0009066	aspartate family amino acid metabolic process	biological_process	0.24011	1	14	2644	112	29181	PGSC0003DMG400004800,PGSC0003DMG400010674,PGSC0003DMG400032250,PGSC0003DMG400027735,PGSC0003DMG400003755,PGSC0003DMG400028127,PGSC0003DMG400033921,PGSC0003DMG400016168,PGSC0003DMG400029938,PGSC0003DMG400028732,PGSC0003DMG400011218,PGSC0003DMG400015379,PGSC0003DMG400000404,PGSC0003DMG400012802
GO:0009141	nucleoside triphosphate metabolic process	biological_process	0.24176	1	49	2644	476	29181	PGSC0003DMG400009154,PGSC0003DMG400000301,PGSC0003DMG400007913,PGSC0003DMG400023039,PGSC0003DMG400030941,PGSC0003DMG400028177,PGSC0003DMG400008751,PGSC0003DMG400015405,PGSC0003DMG400027590,PGSC0003DMG400025171,PGSC0003DMG400008676,PGSC0003DMG400023464,PGSC0003DMG400021322,PGSC0003DMG400000421,PGSC0003DMG400016918,PGSC0003DMG400015276,PGSC0003DMG400012616,PGSC0003DMG400022200,PGSC0003DMG400019247,…
GO:0019748	secondary metabolic process	biological_process	0.24191	1	15	2644	130	29181	PGSC0003DMG400014295,PGSC0003DMG400025616,PGSC0003DMG400029803,PGSC0003DMG402023841,PGSC0003DMG400006270,PGSC0003DMG400029591,PGSC0003DMG401029032,PGSC0003DMG400007791,PGSC0003DMG400028234,PGSC0003DMG400026074,PGSC0003DMG400009925,PGSC0003DMG401011372,PGSC0003DMG400006391,PGSC0003DMG400029730,PGSC0003DMG400015607
GO:0070585	protein localization to mitochondrion	biological_process	0.24262	1	10	2644	83	29181	PGSC0003DMG400033637,PGSC0003DMG400007597,PGSC0003DMG400013894,PGSC0003DMG400011731,PGSC0003DMG400024615,Novel03389,PGSC0003DMG400030630,Novel01580,PGSC0003DMG400016015,PGSC0003DMG400029803
GO:0072655	establishment of protein localization to mitochondrion	biological_process	0.24262	1	10	2644	83	29181	PGSC0003DMG400033637,PGSC0003DMG400011731,PGSC0003DMG400013894,PGSC0003DMG400024615,Novel03389,PGSC0003DMG400007597,PGSC0003DMG400016015,PGSC0003DMG400029803,Novel01580,PGSC0003DMG400030630
GO:0009218	pyrimidine ribonucleotide metabolic process	biological_process	0.24288	1	4	2644	26	29181	PGSC0003DMG400020618,PGSC0003DMG400012276,PGSC0003DMG400003803,PGSC0003DMG400021818
GO:0009220	pyrimidine ribonucleotide biosynthetic process	biological_process	0.24288	1	4	2644	26	29181	PGSC0003DMG400021818,PGSC0003DMG400012276,PGSC0003DMG400003803,PGSC0003DMG400020618
GO:0043648	dicarboxylic acid metabolic process	biological_process	0.24327	1	13	2644	103	29181	PGSC0003DMG400029938,PGSC0003DMG400018987,PGSC0003DMG400009237,PGSC0003DMG400000404,PGSC0003DMG400001438,PGSC0003DMG400010826,PGSC0003DMG400015379,PGSC0003DMG400004800,PGSC0003DMG400032250,PGSC0003DMG401023644,PGSC0003DMG400027735,PGSC0003DMG400003755,PGSC0003DMG400003927
GO:0003690	double-stranded DNA binding	molecular_function	0.24353	1	17	2644	141	29181	PGSC0003DMG400018430,PGSC0003DMG400009887,PGSC0003DMG400018453,PGSC0003DMG400027558,PGSC0003DMG400027538,PGSC0003DMG400008710,PGSC0003DMG400027954,PGSC0003DMG402003179,PGSC0003DMG400027539,PGSC0003DMG400001461,PGSC0003DMG400020720,PGSC0003DMG402003586,PGSC0003DMG400021331,PGSC0003DMG400015340,PGSC0003DMG400007874,PGSC0003DMG400004340,PGSC0003DMG400028145
GO:0022008	neurogenesis	biological_process	0.24365	1	9	2644	69	29181	PGSC0003DMG400010097,PGSC0003DMG400027523,PGSC0003DMG400016293,PGSC0003DMG400011541,PGSC0003DMG400021563,PGSC0003DMG400020133,PGSC0003DMG400003756,PGSC0003DMG400022225,PGSC0003DMG402030499
GO:0031412	gas vesicle organization	biological_process	0.24412	1	5	2644	36	29181	PGSC0003DMG400004628,PGSC0003DMG400008434,PGSC0003DMG400010859,PGSC0003DMG400008945,PGSC0003DMG400006861
GO:0004334	fumarylacetoacetase activity	molecular_function	0.24502	1	2	2644	10	29181	PGSC0003DMG400023608,PGSC0003DMG400013273
GO:0016822	hydrolase activity, acting on acid carbon-carbon bonds	molecular_function	0.24502	1	2	2644	10	29181	PGSC0003DMG400013273,PGSC0003DMG400023608
GO:0016823	hydrolase activity, acting on acid carbon-carbon bonds, in ketonic substances	molecular_function	0.24502	1	2	2644	10	29181	PGSC0003DMG400023608,PGSC0003DMG400013273
GO:0042546	cell wall biogenesis	biological_process	0.24507	1	8	2644	63	29181	PGSC0003DMG400025627,Novel01842,PGSC0003DMG400001059,PGSC0003DMG400033063,PGSC0003DMG400002075,PGSC0003DMG400026565,PGSC0003DMG400006286,PGSC0003DMG400029362
GO:0005216	ion channel activity	molecular_function	0.24606	1	45	2644	423	29181	PGSC0003DMG400006919,PGSC0003DMG401003297,PGSC0003DMG400005160,PGSC0003DMG400009177,PGSC0003DMG400009117,PGSC0003DMG400001066,PGSC0003DMG400020286,PGSC0003DMG400029552,PGSC0003DMG401027116,PGSC0003DMG400023978,Novel02833,PGSC0003DMG400027699,PGSC0003DMG401004716,Novel01806,PGSC0003DMG400024591,PGSC0003DMG400015607,PGSC0003DMG400002730,Novel00232,PGSC0003DMG400031845,PGSC0003DMG400010617,PGSC0003D…
GO:0022838	substrate-specific channel activity	molecular_function	0.24606	1	45	2644	423	29181	PGSC0003DMG400008936,PGSC0003DMG400003993,PGSC0003DMG400024623,PGSC0003DMG402018143,PGSC0003DMG401030861,PGSC0003DMG400024904,PGSC0003DMG400031145,PGSC0003DMG400023512,PGSC0003DMG402003297,PGSC0003DMG402031322,PGSC0003DMG400004753,PGSC0003DMG400030373,PGSC0003DMG400019612,PGSC0003DMG400017350,PGSC0003DMG400008371,PGSC0003DMG400004659,PGSC0003DMG400024763,PGSC0003DMG400009703,PGSC0003DMG401007403,…
GO:0006406	mRNA export from nucleus	biological_process	0.24607	1	6	2644	44	29181	PGSC0003DMG400012613,PGSC0003DMG400010444,PGSC0003DMG400025668,PGSC0003DMG400030405,PGSC0003DMG400003122,PGSC0003DMG400013975
GO:0071166	ribonucleoprotein complex localization	biological_process	0.24607	1	6	2644	44	29181	PGSC0003DMG400013975,PGSC0003DMG400003122,PGSC0003DMG400030405,PGSC0003DMG400010444,PGSC0003DMG400012613,PGSC0003DMG400025668
GO:0071426	ribonucleoprotein complex export from nucleus	biological_process	0.24607	1	6	2644	44	29181	PGSC0003DMG400030405,PGSC0003DMG400012613,PGSC0003DMG400010444,PGSC0003DMG400025668,PGSC0003DMG400013975,PGSC0003DMG400003122
GO:0071427	mRNA-containing ribonucleoprotein complex export from nucleus	biological_process	0.24607	1	6	2644	44	29181	PGSC0003DMG400030405,PGSC0003DMG400025668,PGSC0003DMG400010444,PGSC0003DMG400012613,PGSC0003DMG400013975,PGSC0003DMG400003122
GO:0008452	RNA ligase activity	molecular_function	0.24646	1	3	2644	17	29181	PGSC0003DMG400007295,PGSC0003DMG400010060,PGSC0003DMG400033921
GO:0003847	1-alkyl-2-acetylglycerophosphocholine esterase activity	molecular_function	0.24679	1	4	2644	27	29181	PGSC0003DMG400014543,PGSC0003DMG400001363,PGSC0003DMG400019873,PGSC0003DMG400019347
GO:0051183	vitamin transporter activity	molecular_function	0.24775	1	2	2644	10	29181	PGSC0003DMG400014473,PGSC0003DMG400016803
GO:0007015	actin filament organization	biological_process	0.24825	1	10	2644	83	29181	PGSC0003DMG400001549,PGSC0003DMG402004570,PGSC0003DMG400027769,PGSC0003DMG400009883,PGSC0003DMG400013816,PGSC0003DMG400018800,PGSC0003DMG400026042,PGSC0003DMG401012339,Novel01446,PGSC0003DMG400022318
GO:0015886	heme transport	biological_process	0.24887	1	9	2644	74	29181	PGSC0003DMG400001965,PGSC0003DMG400012569,PGSC0003DMG400017020,PGSC0003DMG400021039,PGSC0003DMG400006022,PGSC0003DMG400001042,PGSC0003DMG400016649,PGSC0003DMG400024754,PGSC0003DMG400016159
GO:1901678	iron coordination entity transport	biological_process	0.24887	1	9	2644	74	29181	PGSC0003DMG400001965,PGSC0003DMG400012569,PGSC0003DMG400021039,PGSC0003DMG400017020,PGSC0003DMG400006022,PGSC0003DMG400001042,PGSC0003DMG400016649,PGSC0003DMG400016159,PGSC0003DMG400024754
GO:0030414	peptidase inhibitor activity	molecular_function	0.24902	1	23	2644	238	29181	PGSC0003DMG400027053,PGSC0003DMG400027052,PGSC0003DMG400001438,PGSC0003DMG400008460,PGSC0003DMG400001373,PGSC0003DMG402030499,PGSC0003DMG400007626,PGSC0003DMG401019427,PGSC0003DMG400028310,PGSC0003DMG400000912,PGSC0003DMG400002703,PGSC0003DMG400002567,PGSC0003DMG400010131,PGSC0003DMG401029222,PGSC0003DMG400010747,PGSC0003DMG400003537,PGSC0003DMG400002690,PGSC0003DMG400031075,PGSC0003DMG400008945,…
GO:0061134	peptidase regulator activity	molecular_function	0.24902	1	23	2644	238	29181	PGSC0003DMG400001438,PGSC0003DMG400027052,PGSC0003DMG400027053,PGSC0003DMG400007626,PGSC0003DMG402030499,PGSC0003DMG401019427,PGSC0003DMG400008460,PGSC0003DMG400001373,PGSC0003DMG400000912,PGSC0003DMG400028310,PGSC0003DMG400010131,PGSC0003DMG400002567,PGSC0003DMG400002703,PGSC0003DMG401029222,PGSC0003DMG400031075,PGSC0003DMG400002690,PGSC0003DMG400010747,PGSC0003DMG400003537,PGSC0003DMG400029323,…
GO:0006605	protein targeting	biological_process	0.24924	1	47	2644	446	29181	PGSC0003DMG400011731,PGSC0003DMG400024615,PGSC0003DMG400033637,PGSC0003DMG400012133,PGSC0003DMG400011322,PGSC0003DMG400011167,PGSC0003DMG400027769,PGSC0003DMG401023504,PGSC0003DMG400022495,PGSC0003DMG400002789,PGSC0003DMG400021787,PGSC0003DMG400013894,PGSC0003DMG400023663,PGSC0003DMG402018143,PGSC0003DMG400007597,PGSC0003DMG400006594,PGSC0003DMG400022268,PGSC0003DMG400028137,PGSC0003DMG400008945,…
GO:0048519	negative regulation of biological process	biological_process	0.24937	1	58	2644	555	29181	PGSC0003DMG400030839,PGSC0003DMG400022405,PGSC0003DMG400022507,PGSC0003DMG400026356,Novel01446,PGSC0003DMG400022318,PGSC0003DMG400028234,PGSC0003DMG400027269,PGSC0003DMG400008945,PGSC0003DMG402005074,PGSC0003DMG400000421,PGSC0003DMG400001752,PGSC0003DMG400003122,PGSC0003DMG400030551,PGSC0003DMG400008000,PGSC0003DMG402030499,PGSC0003DMG400014901,PGSC0003DMG400007150,PGSC0003DMG400007819,PGSC0003DM…
GO:0019054	modulation by virus of host process	biological_process	0.24988	1	7	2644	54	29181	PGSC0003DMG400028145,PGSC0003DMG400030839,PGSC0003DMG400031145,PGSC0003DMG400011044,PGSC0003DMG400021331,PGSC0003DMG400014854,PGSC0003DMG400010388
GO:0044068	modulation by symbiont of host cellular process	biological_process	0.24988	1	7	2644	54	29181	PGSC0003DMG400031145,PGSC0003DMG400030839,PGSC0003DMG400028145,PGSC0003DMG400014854,PGSC0003DMG400010388,PGSC0003DMG400021331,PGSC0003DMG400011044
GO:0051184	cofactor transporter activity	molecular_function	0.25212	1	6	2644	47	29181	PGSC0003DMG400016803,PGSC0003DMG400012569,PGSC0003DMG400016649,PGSC0003DMG400017020,PGSC0003DMG400024754,PGSC0003DMG400006022
GO:0010827	regulation of glucose transport	biological_process	0.25251	1	3	2644	19	29181	PGSC0003DMG402005074,PGSC0003DMG400032789,PGSC0003DMG400026246
GO:0010829	negative regulation of glucose transport	biological_process	0.25251	1	3	2644	19	29181	PGSC0003DMG400026246,PGSC0003DMG400032789,PGSC0003DMG402005074
GO:0015758	glucose transport	biological_process	0.25251	1	3	2644	19	29181	PGSC0003DMG402005074,PGSC0003DMG400032789,PGSC0003DMG400026246
GO:0046323	glucose import	biological_process	0.25251	1	3	2644	19	29181	PGSC0003DMG400026246,PGSC0003DMG402005074,PGSC0003DMG400032789
GO:0046324	regulation of glucose import	biological_process	0.25251	1	3	2644	19	29181	PGSC0003DMG400026246,PGSC0003DMG400032789,PGSC0003DMG402005074
GO:0046325	negative regulation of glucose import	biological_process	0.25251	1	3	2644	19	29181	PGSC0003DMG400032789,PGSC0003DMG402005074,PGSC0003DMG400026246
GO:0051180	vitamin transport	biological_process	0.25305	1	3	2644	18	29181	PGSC0003DMG400013896,PGSC0003DMG400016803,PGSC0003DMG400014473
GO:0030990	intraciliary transport particle	cellular_component	0.25387	1	1	2644	3	29181	PGSC0003DMG400009956
GO:0030991	intraciliary transport particle A	cellular_component	0.25387	1	1	2644	3	29181	PGSC0003DMG400009956
GO:0042132	fructose 1,6-bisphosphate 1-phosphatase activity	molecular_function	0.25482	1	3	2644	18	29181	PGSC0003DMG400010788,PGSC0003DMG400030950,PGSC0003DMG402014514
GO:2000574	regulation of microtubule motor activity	biological_process	0.25502	1	1	2644	3	29181	PGSC0003DMG400012451
GO:2000575	negative regulation of microtubule motor activity	biological_process	0.25502	1	1	2644	3	29181	PGSC0003DMG400012451
GO:0006643	membrane lipid metabolic process	biological_process	0.25615	1	29	2644	263	29181	PGSC0003DMG400002204,PGSC0003DMG400016649,PGSC0003DMG401018740,PGSC0003DMG400004274,PGSC0003DMG400015749,PGSC0003DMG400006410,PGSC0003DMG400008472,PGSC0003DMG400005668,PGSC0003DMG400009965,Novel02831,PGSC0003DMG400003509,PGSC0003DMG400018670,PGSC0003DMG400022026,PGSC0003DMG400009405,PGSC0003DMG402023631,PGSC0003DMG400022911,PGSC0003DMG400002291,PGSC0003DMG400005696,PGSC0003DMG400021558,PGSC0003DM…
GO:0044267	cellular protein metabolic process	biological_process	0.25674	1	455	2644	4602	29181	PGSC0003DMG400000330,PGSC0003DMG400000728,PGSC0003DMG400020848,PGSC0003DMG400023512,PGSC0003DMG400015361,PGSC0003DMG400022391,Novel02521,PGSC0003DMG402020263,PGSC0003DMG400012334,PGSC0003DMG400002497,PGSC0003DMG400005418,PGSC0003DMG400003343,PGSC0003DMG400031812,PGSC0003DMG400026339,PGSC0003DMG400013178,PGSC0003DMG400009063,PGSC0003DMG400018670,PGSC0003DMG400014714,PGSC0003DMG400010067,PGSC0003DM…
GO:0004040	amidase activity	molecular_function	0.25742	1	1	2644	3	29181	PGSC0003DMG400003537
GO:0009791	post-embryonic development	biological_process	0.25759	1	5	2644	42	29181	PGSC0003DMG400021394,PGSC0003DMG400027012,PGSC0003DMG400030662,PGSC0003DMG400017152,PGSC0003DMG400020292
GO:0072527	pyrimidine-containing compound metabolic process	biological_process	0.25799	1	17	2644	152	29181	PGSC0003DMG400008676,PGSC0003DMG400033054,PGSC0003DMG400022200,PGSC0003DMG400011790,PGSC0003DMG400000613,PGSC0003DMG400003803,PGSC0003DMG401029222,PGSC0003DMG400002932,PGSC0003DMG400020321,PGSC0003DMG401011372,PGSC0003DMG400028165,PGSC0003DMG400022502,PGSC0003DMG400012276,PGSC0003DMG400017151,PGSC0003DMG400021818,PGSC0003DMG400011167,PGSC0003DMG400020618
GO:0016717	oxidoreductase activity, acting on paired donors, with oxidation of a pair of donors resulting in the reduction of molecular oxygen to two molecules of water	molecular_function	0.25866	1	6	2644	43	29181	PGSC0003DMG400016247,PGSC0003DMG400032204,PGSC0003DMG400002943,PGSC0003DMG400005507,PGSC0003DMG400023833,PGSC0003DMG400008472
GO:0016641	oxidoreductase activity, acting on the CH-NH2 group of donors, oxygen as acceptor	molecular_function	0.25992	1	6	2644	45	29181	PGSC0003DMG400031836,PGSC0003DMG400010999,PGSC0003DMG400007008,PGSC0003DMG400030082,PGSC0003DMG402028101,PGSC0003DMG400001525
GO:0019083	viral transcription	biological_process	0.26084	1	9	2644	71	29181	PGSC0003DMG400015793,PGSC0003DMG400004274,PGSC0003DMG400020364,PGSC0003DMG400028925,PGSC0003DMG400010721,PGSC0003DMG400000468,PGSC0003DMG400011015,PGSC0003DMG402007406,PGSC0003DMG400014166
GO:0016791	phosphatase activity	molecular_function	0.26088	1	51	2644	466	29181	PGSC0003DMG400023506,PGSC0003DMG401013112,PGSC0003DMG400009862,PGSC0003DMG400030965,PGSC0003DMG400011246,PGSC0003DMG401026043,PGSC0003DMG400012910,Novel03516,PGSC0003DMG400002613,PGSC0003DMG400028371,PGSC0003DMG400009040,PGSC0003DMG400010788,PGSC0003DMG400030964,Novel01869,PGSC0003DMG400022183,PGSC0003DMG400008271,PGSC0003DMG400024909,PGSC0003DMG400021596,PGSC0003DMG400031296,PGSC0003DMG400017317…
GO:0003743	translation initiation factor activity	molecular_function	0.26381	1	16	2644	145	29181	PGSC0003DMG400001752,PGSC0003DMG400025619,PGSC0003DMG400010986,PGSC0003DMG400003803,PGSC0003DMG400015361,PGSC0003DMG400008029,PGSC0003DMG400014429,PGSC0003DMG400025055,Novel00276,PGSC0003DMG401033880,PGSC0003DMG400015477,PGSC0003DMG400000523,PGSC0003DMG400032510,PGSC0003DMG400026456,PGSC0003DMG400031809,PGSC0003DMG400016457
GO:0003712	transcription cofactor activity	molecular_function	0.26394	1	37	2644	355	29181	PGSC0003DMG401026984,PGSC0003DMG400003122,PGSC0003DMG400013434,PGSC0003DMG400028961,PGSC0003DMG400015711,PGSC0003DMG400017298,PGSC0003DMG400008437,PGSC0003DMG400015211,Novel01031,PGSC0003DMG400022507,PGSC0003DMG400003309,PGSC0003DMG400022405,PGSC0003DMG400007462,PGSC0003DMG400029466,PGSC0003DMG400001659,PGSC0003DMG400031145,PGSC0003DMG400001684,PGSC0003DMG400000985,PGSC0003DMG401012439,PGSC0003DM…
GO:0009878	nodule morphogenesis	biological_process	0.26425	1	4	2644	32	29181	PGSC0003DMG400030662,PGSC0003DMG400021394,PGSC0003DMG400017152,PGSC0003DMG400020292
GO:0009886	post-embryonic morphogenesis	biological_process	0.26425	1	4	2644	32	29181	PGSC0003DMG400020292,PGSC0003DMG400021394,PGSC0003DMG400030662,PGSC0003DMG400017152
GO:0044111	development involved in symbiotic interaction	biological_process	0.26425	1	4	2644	32	29181	PGSC0003DMG400020292,PGSC0003DMG400017152,PGSC0003DMG400021394,PGSC0003DMG400030662
GO:0010628	positive regulation of gene expression	biological_process	0.26505	1	17	2644	152	29181	PGSC0003DMG400033906,PGSC0003DMG400022569,PGSC0003DMG400024310,Novel00078,PGSC0003DMG400028929,PGSC0003DMG401033880,PGSC0003DMG400008358,PGSC0003DMG400002927,PGSC0003DMG400024511,PGSC0003DMG400030560,PGSC0003DMG400027168,PGSC0003DMG400022507,PGSC0003DMG400028234,PGSC0003DMG400001907,Novel01580,PGSC0003DMG400022063,PGSC0003DMG400022038
GO:0043605	cellular amide catabolic process	biological_process	0.26585	1	3	2644	19	29181	PGSC0003DMG400025471,PGSC0003DMG400013879,PGSC0003DMG400010231
GO:0006090	pyruvate metabolic process	biological_process	0.26587	1	10	2644	83	29181	PGSC0003DMG400002675,PGSC0003DMG400019247,PGSC0003DMG400011044,PGSC0003DMG400005494,PGSC0003DMG400002690,PGSC0003DMG400025171,PGSC0003DMG400002201,PGSC0003DMG400012910,PGSC0003DMG400028177,PGSC0003DMG402023631
GO:0010207	photosystem II assembly	biological_process	0.26591	1	2	2644	10	29181	PGSC0003DMG400024310,PGSC0003DMG400021555
GO:0048523	negative regulation of cellular process	biological_process	0.26618	1	46	2644	436	29181	PGSC0003DMG400021091,PGSC0003DMG400015477,PGSC0003DMG400025501,PGSC0003DMG400024698,PGSC0003DMG400002789,PGSC0003DMG400014901,PGSC0003DMG400007150,PGSC0003DMG400007819,PGSC0003DMG402030499,PGSC0003DMG400030551,PGSC0003DMG400008000,PGSC0003DMG400001752,PGSC0003DMG400000421,PGSC0003DMG400008945,PGSC0003DMG400027269,PGSC0003DMG400028234,PGSC0003DMG400022318,Novel01446,PGSC0003DMG400030839,PGSC0003DM…
GO:0016052	carbohydrate catabolic process	biological_process	0.26658	1	21	2644	186	29181	PGSC0003DMG400026523,PGSC0003DMG400005339,PGSC0003DMG400025171,PGSC0003DMG400028177,PGSC0003DMG400012910,PGSC0003DMG400011246,PGSC0003DMG400002675,PGSC0003DMG400025384,PGSC0003DMG400017309,PGSC0003DMG400005494,PGSC0003DMG400001855,PGSC0003DMG400002690,PGSC0003DMG400001976,PGSC0003DMG400014662,PGSC0003DMG400020321,PGSC0003DMG402023631,PGSC0003DMG400019247,PGSC0003DMG400011044,PGSC0003DMG400001549,…
GO:0017148	negative regulation of translation	biological_process	0.26661	1	4	2644	29	29181	PGSC0003DMG400005577,PGSC0003DMG400008945,PGSC0003DMG400030551,PGSC0003DMG400001854
GO:0034249	negative regulation of cellular amide metabolic process	biological_process	0.26661	1	4	2644	29	29181	PGSC0003DMG400030551,PGSC0003DMG400001854,PGSC0003DMG400005577,PGSC0003DMG400008945
GO:0050660	flavin adenine dinucleotide binding	molecular_function	0.26673	1	29	2644	263	29181	PGSC0003DMG400005886,PGSC0003DMG400018665,PGSC0003DMG400002777,PGSC0003DMG402001978,PGSC0003DMG400004828,PGSC0003DMG400012550,PGSC0003DMG400022026,PGSC0003DMG400010174,PGSC0003DMG400021109,PGSC0003DMG400002067,PGSC0003DMG400005284,PGSC0003DMG400011238,PGSC0003DMG400022618,Novel03619,PGSC0003DMG400024003,PGSC0003DMG400021111,PGSC0003DMG400025098,PGSC0003DMG400021216,PGSC0003DMG400017976,PGSC0003DM…
GO:0010970	microtubule-based transport	biological_process	0.26684	1	1	2644	4	29181	PGSC0003DMG400009094
GO:0030705	cytoskeleton-dependent intracellular transport	biological_process	0.26684	1	1	2644	4	29181	PGSC0003DMG400009094
GO:0042073	intraciliary transport	biological_process	0.26684	1	1	2644	4	29181	PGSC0003DMG400009094
GO:0004749	ribose phosphate diphosphokinase activity	molecular_function	0.26775	1	2	2644	11	29181	PGSC0003DMG400025055,PGSC0003DMG400024226
GO:0005525	GTP binding	molecular_function	0.26791	1	86	2644	799	29181	PGSC0003DMG400023506,PGSC0003DMG400005468,PGSC0003DMG400019677,PGSC0003DMG400030121,PGSC0003DMG400021456,PGSC0003DMG400001419,Novel01730,PGSC0003DMG400009040,PGSC0003DMG400014512,PGSC0003DMG401031064,PGSC0003DMG400000124,PGSC0003DMG400003089,PGSC0003DMG400022183,PGSC0003DMG400028422,PGSC0003DMG400000227,Novel00629,PGSC0003DMG400023882,PGSC0003DMG400030560,PGSC0003DMG400026082,PGSC0003DMG400019913…
GO:0044038	cell wall macromolecule biosynthetic process	biological_process	0.26855	1	3	2644	20	29181	PGSC0003DMG400001059,PGSC0003DMG400033063,PGSC0003DMG400029362
GO:0070589	cellular component macromolecule biosynthetic process	biological_process	0.26855	1	3	2644	20	29181	PGSC0003DMG400001059,PGSC0003DMG400033063,PGSC0003DMG400029362
GO:0035303	regulation of dephosphorylation	biological_process	0.2702	1	3	2644	19	29181	PGSC0003DMG400018119,PGSC0003DMG400020383,PGSC0003DMG400011246
GO:0035304	regulation of protein dephosphorylation	biological_process	0.2702	1	3	2644	19	29181	PGSC0003DMG400018119,PGSC0003DMG400020383,PGSC0003DMG400011246
GO:0045116	protein neddylation	biological_process	0.27031	1	3	2644	20	29181	PGSC0003DMG400026385,PGSC0003DMG400023428,PGSC0003DMG401025083
GO:0055086	nucleobase-containing small molecule metabolic process	biological_process	0.2723	1	83	2644	825	29181	PGSC0003DMG400001932,PGSC0003DMG400016553,PGSC0003DMG400009782,PGSC0003DMG400025171,PGSC0003DMG400030941,PGSC0003DMG400028177,Novel00282,PGSC0003DMG400023039,PGSC0003DMG400025055,PGSC0003DMG400002497,PGSC0003DMG400028165,PGSC0003DMG400021264,PGSC0003DMG400027315,PGSC0003DMG400010084,PGSC0003DMG402028101,PGSC0003DMG402031322,PGSC0003DMG400011790,PGSC0003DMG400011044,PGSC0003DMG400022200,PGSC0003DM…
GO:0072509	divalent inorganic cation transmembrane transporter activity	molecular_function	0.27239	1	30	2644	277	29181	PGSC0003DMG401013112,PGSC0003DMG400014843,PGSC0003DMG400012516,PGSC0003DMG400030630,PGSC0003DMG400012984,PGSC0003DMG400017824,PGSC0003DMG400010794,PGSC0003DMG401024899,PGSC0003DMG400013442,PGSC0003DMG400009177,PGSC0003DMG400009401,PGSC0003DMG401003297,PGSC0003DMG400005160,PGSC0003DMG400028102,PGSC0003DMG400028422,PGSC0003DMG400004439,PGSC0003DMG400010617,PGSC0003DMG402003705,PGSC0003DMG400024909,…
GO:0001501	skeletal system development	biological_process	0.27268	1	1	2644	3	29181	PGSC0003DMG400033650
GO:0002062	chondrocyte differentiation	biological_process	0.27268	1	1	2644	3	29181	PGSC0003DMG400033650
GO:0035988	chondrocyte proliferation	biological_process	0.27268	1	1	2644	3	29181	PGSC0003DMG400033650
GO:0051216	cartilage development	biological_process	0.27268	1	1	2644	3	29181	PGSC0003DMG400033650
GO:0061448	connective tissue development	biological_process	0.27268	1	1	2644	3	29181	PGSC0003DMG400033650
GO:0007399	nervous system development	biological_process	0.27324	1	9	2644	72	29181	PGSC0003DMG400010097,PGSC0003DMG400016293,PGSC0003DMG400027523,PGSC0003DMG400011541,PGSC0003DMG400021563,PGSC0003DMG400003756,PGSC0003DMG402030499,PGSC0003DMG400022225,PGSC0003DMG400020133
GO:0003887	DNA-directed DNA polymerase activity	molecular_function	0.27337	1	28	2644	271	29181	PGSC0003DMG400027784,PGSC0003DMG400017439,PGSC0003DMG400013494,PGSC0003DMG400012522,PGSC0003DMG400016845,PGSC0003DMG400027083,PGSC0003DMG402028101,PGSC0003DMG400012034,PGSC0003DMG400020488,PGSC0003DMG400018338,Novel01692,PGSC0003DMG400009472,PGSC0003DMG400007316,PGSC0003DMG400031043,PGSC0003DMG400022749,PGSC0003DMG400004253,PGSC0003DMG400021322,PGSC0003DMG400007199,PGSC0003DMG402026272,PGSC0003DM…
GO:0098657	import into cell	biological_process	0.27392	1	1	2644	3	29181	PGSC0003DMG400002012
GO:0006486	protein glycosylation	biological_process	0.27467	1	16	2644	139	29181	PGSC0003DMG401014605,PGSC0003DMG400023340,PGSC0003DMG400026456,PGSC0003DMG400014847,PGSC0003DMG400021307,PGSC0003DMG400011347,PGSC0003DMG400009066,PGSC0003DMG400000060,PGSC0003DMG400028961,PGSC0003DMG400027080,PGSC0003DMG400020351,PGSC0003DMG400026229,PGSC0003DMG400015211,Novel01511,PGSC0003DMG400003313,PGSC0003DMG400017723
GO:0043413	macromolecule glycosylation	biological_process	0.27467	1	16	2644	139	29181	PGSC0003DMG400003313,PGSC0003DMG400017723,PGSC0003DMG400027080,PGSC0003DMG400020351,PGSC0003DMG400015211,Novel01511,PGSC0003DMG400026229,PGSC0003DMG400011347,PGSC0003DMG400028961,PGSC0003DMG400000060,PGSC0003DMG400009066,PGSC0003DMG400026456,PGSC0003DMG400023340,PGSC0003DMG401014605,PGSC0003DMG400021307,PGSC0003DMG400014847
GO:0015926	glucosidase activity	molecular_function	0.2752	1	3	2644	18	29181	PGSC0003DMG401022600,PGSC0003DMG400014869,PGSC0003DMG400013856
GO:0016108	tetraterpenoid metabolic process	biological_process	0.27527	1	9	2644	70	29181	PGSC0003DMG400027156,PGSC0003DMG400014901,PGSC0003DMG400026225,Novel00910,PGSC0003DMG400004608,PGSC0003DMG400011238,PGSC0003DMG400022026,PGSC0003DMG402001978,PGSC0003DMG400005886
GO:0016109	tetraterpenoid biosynthetic process	biological_process	0.27527	1	9	2644	70	29181	PGSC0003DMG400022026,PGSC0003DMG402001978,PGSC0003DMG400005886,PGSC0003DMG400026225,Novel00910,PGSC0003DMG400004608,PGSC0003DMG400011238,PGSC0003DMG400027156,PGSC0003DMG400014901
GO:0016116	carotenoid metabolic process	biological_process	0.27527	1	9	2644	70	29181	PGSC0003DMG400022026,PGSC0003DMG402001978,PGSC0003DMG400005886,PGSC0003DMG400026225,PGSC0003DMG400004608,Novel00910,PGSC0003DMG400011238,PGSC0003DMG400027156,PGSC0003DMG400014901
GO:0016117	carotenoid biosynthetic process	biological_process	0.27527	1	9	2644	70	29181	PGSC0003DMG402001978,PGSC0003DMG400005886,PGSC0003DMG400022026,PGSC0003DMG400011238,PGSC0003DMG400026225,PGSC0003DMG400004608,Novel00910,PGSC0003DMG400014901,PGSC0003DMG400027156
GO:0008483	transaminase activity	molecular_function	0.27538	1	4	2644	25	29181	PGSC0003DMG400021866,PGSC0003DMG400022742,PGSC0003DMG400004899,PGSC0003DMG400004643
GO:0006071	glycerol metabolic process	biological_process	0.27587	1	2	2644	11	29181	PGSC0003DMG400012634,PGSC0003DMG402014514
GO:0016776	phosphotransferase activity, phosphate group as acceptor	molecular_function	0.27674	1	7	2644	55	29181	PGSC0003DMG400001247,PGSC0003DMG400003792,PGSC0003DMG400012276,PGSC0003DMG400027906,PGSC0003DMG400015745,PGSC0003DMG400026784,PGSC0003DMG400010076
GO:0043154	negative regulation of cysteine-type endopeptidase activity involved in apoptotic process	biological_process	0.27685	1	2	2644	11	29181	PGSC0003DMG400008000,PGSC0003DMG400027269
GO:2000117	negative regulation of cysteine-type endopeptidase activity	biological_process	0.27685	1	2	2644	11	29181	PGSC0003DMG400027269,PGSC0003DMG400008000
GO:0004488	methylenetetrahydrofolate dehydrogenase (NADP+) activity	molecular_function	0.27705	1	6	2644	48	29181	Novel01240,PGSC0003DMG400023608,PGSC0003DMG400018793,PGSC0003DMG400004572,PGSC0003DMG400011038,PGSC0003DMG402028101
GO:0006858	extracellular transport	biological_process	0.27894	1	3	2644	18	29181	PGSC0003DMG400008308,PGSC0003DMG400026385,PGSC0003DMG400032124
GO:0005326	neurotransmitter transporter activity	molecular_function	0.27917	1	1	2644	3	29181	PGSC0003DMG400016891
GO:0005328	neurotransmitter:sodium symporter activity	molecular_function	0.27917	1	1	2644	3	29181	PGSC0003DMG400016891
GO:0005335	serotonin:sodium symporter activity	molecular_function	0.27917	1	1	2644	3	29181	PGSC0003DMG400016891
GO:0008504	monoamine transmembrane transporter activity	molecular_function	0.27917	1	1	2644	3	29181	PGSC0003DMG400016891
GO:0015222	serotonin transmembrane transporter activity	molecular_function	0.27917	1	1	2644	3	29181	PGSC0003DMG400016891
GO:0019751	polyol metabolic process	biological_process	0.27982	1	6	2644	45	29181	PGSC0003DMG400026225,PGSC0003DMG400035836,PGSC0003DMG400001976,PGSC0003DMG400016878,PGSC0003DMG402014514,PGSC0003DMG400012634
GO:0015649	2-keto-3-deoxygluconate:proton symporter activity	molecular_function	0.27987	1	1	2644	3	29181	PGSC0003DMG400009074
GO:0046411	2-keto-3-deoxygluconate transport	biological_process	0.27987	1	1	2644	3	29181	PGSC0003DMG400009074
GO:0016051	carbohydrate biosynthetic process	biological_process	0.28045	1	41	2644	387	29181	PGSC0003DMG400027050,PGSC0003DMG400025171,PGSC0003DMG400004274,PGSC0003DMG400028538,PGSC0003DMG400016878,PGSC0003DMG400009887,PGSC0003DMG400003067,PGSC0003DMG400030453,PGSC0003DMG400017516,PGSC0003DMG400010794,PGSC0003DMG400008447,PGSC0003DMG400009477,PGSC0003DMG400009965,PGSC0003DMG400005749,PGSC0003DMG400029348,PGSC0003DMG402005942,PGSC0003DMG400002396,PGSC0003DMG400029938,PGSC0003DMG402014514,…
GO:0005891	voltage-gated calcium channel complex	cellular_component	0.28119	1	3	2644	19	29181	PGSC0003DMG401009709,PGSC0003DMG400018131,PGSC0003DMG400005160
GO:0034704	calcium channel complex	cellular_component	0.28119	1	3	2644	19	29181	PGSC0003DMG400005160,PGSC0003DMG400018131,PGSC0003DMG401009709
GO:0008374	O-acyltransferase activity	molecular_function	0.28134	1	13	2644	109	29181	PGSC0003DMG402015686,PGSC0003DMG400005668,Novel00283,PGSC0003DMG400014379,PGSC0003DMG400010674,PGSC0003DMG400027951,PGSC0003DMG400009219,PGSC0003DMG400022911,PGSC0003DMG400025881,PGSC0003DMG401028367,PGSC0003DMG400007965,PGSC0003DMG400023163,PGSC0003DMG400001363
GO:0071771	aldehyde decarbonylase activity	molecular_function	0.28144	1	1	2644	3	29181	PGSC0003DMG400015015
GO:0042710	biofilm formation	biological_process	0.28148	1	6	2644	48	29181	PGSC0003DMG400001854,PGSC0003DMG400030551,PGSC0003DMG400024998,PGSC0003DMG400003896,PGSC0003DMG400012123,PGSC0003DMG400008945
GO:0042555	MCM complex	cellular_component	0.28157	1	1	2644	3	29181	PGSC0003DMG400002190
GO:0015267	channel activity	molecular_function	0.28257	1	46	2644	439	29181	Novel01055,Novel02588,PGSC0003DMG400021091,PGSC0003DMG400007784,PGSC0003DMG401007403,PGSC0003DMG400024763,PGSC0003DMG400008371,PGSC0003DMG400004659,PGSC0003DMG400009703,PGSC0003DMG400019612,PGSC0003DMG400003778,PGSC0003DMG400030373,PGSC0003DMG400017350,PGSC0003DMG402003297,PGSC0003DMG402031322,PGSC0003DMG400023512,PGSC0003DMG400004753,PGSC0003DMG400024904,PGSC0003DMG401030861,PGSC0003DMG400031145…
GO:0022803	passive transmembrane transporter activity	molecular_function	0.28257	1	46	2644	439	29181	PGSC0003DMG400009703,PGSC0003DMG400024763,PGSC0003DMG400008371,PGSC0003DMG400004659,PGSC0003DMG400017350,PGSC0003DMG400019612,PGSC0003DMG400003778,PGSC0003DMG400030373,Novel02588,PGSC0003DMG400021091,Novel01055,PGSC0003DMG400007784,PGSC0003DMG401007403,PGSC0003DMG402018143,PGSC0003DMG400024623,PGSC0003DMG400003993,PGSC0003DMG400008936,PGSC0003DMG400004753,PGSC0003DMG402031322,PGSC0003DMG402003297…
GO:0015179	L-amino acid transmembrane transporter activity	molecular_function	0.28287	1	2	2644	11	29181	PGSC0003DMG400001410,PGSC0003DMG400012516
GO:0007409	axonogenesis	biological_process	0.28334	1	7	2644	53	29181	PGSC0003DMG400016293,PGSC0003DMG400003756,PGSC0003DMG400027523,PGSC0003DMG400011541,PGSC0003DMG400022225,PGSC0003DMG400021563,PGSC0003DMG400010097
GO:0007411	axon guidance	biological_process	0.28334	1	7	2644	53	29181	PGSC0003DMG400021563,PGSC0003DMG400010097,PGSC0003DMG400027523,PGSC0003DMG400016293,PGSC0003DMG400003756,PGSC0003DMG400022225,PGSC0003DMG400011541
GO:0048667	cell morphogenesis involved in neuron differentiation	biological_process	0.28334	1	7	2644	53	29181	PGSC0003DMG400010097,PGSC0003DMG400021563,PGSC0003DMG400011541,PGSC0003DMG400022225,PGSC0003DMG400016293,PGSC0003DMG400003756,PGSC0003DMG400027523
GO:0048812	neuron projection morphogenesis	biological_process	0.28334	1	7	2644	53	29181	PGSC0003DMG400011541,PGSC0003DMG400022225,PGSC0003DMG400027523,PGSC0003DMG400016293,PGSC0003DMG400003756,PGSC0003DMG400010097,PGSC0003DMG400021563
GO:0061564	axon development	biological_process	0.28334	1	7	2644	53	29181	PGSC0003DMG400027523,PGSC0003DMG400016293,PGSC0003DMG400003756,PGSC0003DMG400011541,PGSC0003DMG400022225,PGSC0003DMG400021563,PGSC0003DMG400010097
GO:0097485	neuron projection guidance	biological_process	0.28334	1	7	2644	53	29181	PGSC0003DMG400016293,PGSC0003DMG400003756,PGSC0003DMG400027523,PGSC0003DMG400022225,PGSC0003DMG400011541,PGSC0003DMG400021563,PGSC0003DMG400010097
GO:0010921	regulation of phosphatase activity	biological_process	0.28367	1	2	2644	11	29181	PGSC0003DMG400018119,PGSC0003DMG400011246
GO:0007417	central nervous system development	biological_process	0.28373	1	1	2644	5	29181	PGSC0003DMG400020133
GO:0007420	brain development	biological_process	0.28373	1	1	2644	5	29181	PGSC0003DMG400020133
GO:0060322	head development	biological_process	0.28373	1	1	2644	5	29181	PGSC0003DMG400020133
GO:0008284	positive regulation of cell proliferation	biological_process	0.28561	1	4	2644	31	29181	PGSC0003DMG400012543,PGSC0003DMG400025117,PGSC0003DMG400002852,PGSC0003DMG400015850
GO:0000275	mitochondrial proton-transporting ATP synthase complex, catalytic core F(1)	cellular_component	0.28753	1	5	2644	42	29181	PGSC0003DMG400000421,PGSC0003DMG400028842,PGSC0003DMG400030560,PGSC0003DMG400018763,PGSC0003DMG400012616
GO:0000154	rRNA modification	biological_process	0.28762	1	4	2644	28	29181	PGSC0003DMG400016412,PGSC0003DMG400016210,PGSC0003DMG400032503,PGSC0003DMG400012593
GO:0031167	rRNA methylation	biological_process	0.28762	1	4	2644	28	29181	PGSC0003DMG400016412,PGSC0003DMG400016210,PGSC0003DMG400012593,PGSC0003DMG400032503
GO:0005125	cytokine activity	molecular_function	0.28841	1	9	2644	85	29181	PGSC0003DMG400006861,PGSC0003DMG402018530,PGSC0003DMG400027024,PGSC0003DMG400002398,PGSC0003DMG400024981,PGSC0003DMG400028732,PGSC0003DMG400002777,PGSC0003DMG400012034,PGSC0003DMG400032789
GO:0034061	DNA polymerase activity	molecular_function	0.28854	1	33	2644	324	29181	PGSC0003DMG400025989,PGSC0003DMG400023802,PGSC0003DMG400022750,PGSC0003DMG400018259,PGSC0003DMG402026272,PGSC0003DMG400010246,PGSC0003DMG400007199,PGSC0003DMG400007316,PGSC0003DMG400009472,Novel01692,PGSC0003DMG400022038,PGSC0003DMG400004253,PGSC0003DMG400016845,PGSC0003DMG400018338,PGSC0003DMG400013494,PGSC0003DMG400012522,PGSC0003DMG400002789,PGSC0003DMG400030000,PGSC0003DMG400001303,PGSC0003DM…
GO:0004435	phosphatidylinositol phospholipase C activity	molecular_function	0.28874	1	3	2644	19	29181	PGSC0003DMG400011937,PGSC0003DMG400006622,PGSC0003DMG400006621
GO:0005852	eukaryotic translation initiation factor 3 complex	cellular_component	0.28875	1	5	2644	35	29181	PGSC0003DMG400001752,PGSC0003DMG400000523,PGSC0003DMG400008029,PGSC0003DMG400016457,PGSC0003DMG400003803
GO:0008716	D-alanine-D-alanine ligase activity	molecular_function	0.28898	1	2	2644	10	29181	PGSC0003DMG400016395,PGSC0003DMG400008551
GO:0031490	chromatin DNA binding	molecular_function	0.28904	1	1	2644	3	29181	PGSC0003DMG400006621
GO:0031492	nucleosomal DNA binding	molecular_function	0.28904	1	1	2644	3	29181	PGSC0003DMG400006621
GO:0046729	viral procapsid	cellular_component	0.28995	1	1	2644	4	29181	PGSC0003DMG400016395
GO:0003713	transcription coactivator activity	molecular_function	0.2907	1	6	2644	48	29181	PGSC0003DMG400029466,PGSC0003DMG400017298,PGSC0003DMG400022507,PGSC0003DMG400015213,PGSC0003DMG400011687,PGSC0003DMG400031145
GO:0042302	structural constituent of cuticle	molecular_function	0.29088	1	7	2644	58	29181	PGSC0003DMG400031145,PGSC0003DMG400017965,PGSC0003DMG400022749,PGSC0003DMG400001456,PGSC0003DMG401029631,PGSC0003DMG400022750,PGSC0003DMG400001247
GO:0006265	DNA topological change	biological_process	0.29106	1	13	2644	118	29181	PGSC0003DMG400027954,PGSC0003DMG400026278,PGSC0003DMG400016655,PGSC0003DMG400030965,PGSC0003DMG400008710,PGSC0003DMG401015894,PGSC0003DMG400022318,PGSC0003DMG400020474,PGSC0003DMG400014222,PGSC0003DMG400033063,PGSC0003DMG400004470,PGSC0003DMG400006639,PGSC0003DMG400017678
GO:0016831	carboxy-lyase activity	molecular_function	0.29127	1	24	2644	224	29181	PGSC0003DMG400009033,PGSC0003DMG400026280,PGSC0003DMG400021264,PGSC0003DMG400002190,Novel00136,PGSC0003DMG400030134,PGSC0003DMG400003340,PGSC0003DMG402031322,PGSC0003DMG400026303,PGSC0003DMG400013474,PGSC0003DMG400030814,PGSC0003DMG400029050,PGSC0003DMG401027186,PGSC0003DMG400021307,PGSC0003DMG400022764,PGSC0003DMG400027602,PGSC0003DMG402008890,PGSC0003DMG400006391,PGSC0003DMG400013331,PGSC0003DM…
GO:0051168	nuclear export	biological_process	0.29138	1	7	2644	57	29181	PGSC0003DMG400030405,PGSC0003DMG400010444,PGSC0003DMG400012613,PGSC0003DMG400025668,PGSC0003DMG400013975,PGSC0003DMG400023555,PGSC0003DMG400003122
GO:0009057	macromolecule catabolic process	biological_process	0.29222	1	59	2644	590	29181	Novel03093,PGSC0003DMG400031809,PGSC0003DMG400017753,PGSC0003DMG400030763,PGSC0003DMG400030840,PGSC0003DMG400015933,PGSC0003DMG400015462,PGSC0003DMG400011365,PGSC0003DMG400032124,PGSC0003DMG400001855,PGSC0003DMG400005668,PGSC0003DMG400026853,PGSC0003DMG401029345,PGSC0003DMG400005144,PGSC0003DMG400012034,PGSC0003DMG400020321,PGSC0003DMG400015434,PGSC0003DMG400008673,PGSC0003DMG400007126,PGSC0003DM…
GO:0033691	sialic acid binding	molecular_function	0.29275	1	1	2644	5	29181	PGSC0003DMG400022749
GO:0008134	transcription factor binding	molecular_function	0.29283	1	35	2644	317	29181	PGSC0003DMG400009040,PGSC0003DMG400008308,PGSC0003DMG400020294,PGSC0003DMG401008136,PGSC0003DMG400011837,PGSC0003DMG400010454,PGSC0003DMG402002542,PGSC0003DMG400021556,PGSC0003DMG400014854,Novel01257,PGSC0003DMG400014248,PGSC0003DMG400014163,PGSC0003DMG400024909,PGSC0003DMG401031064,PGSC0003DMG401030517,PGSC0003DMG400030968,PGSC0003DMG400013633,PGSC0003DMG400017494,PGSC0003DMG400000173,PGSC0003DM…
GO:0008418	protein-N-terminal asparagine amidohydrolase activity	molecular_function	0.29355	1	1	2644	3	29181	PGSC0003DMG400006312
GO:0043549	regulation of kinase activity	biological_process	0.29365	1	4	2644	29	29181	PGSC0003DMG400007819,PGSC0003DMG400009051,PGSC0003DMG400022507,PGSC0003DMG400027771
GO:0045859	regulation of protein kinase activity	biological_process	0.29365	1	4	2644	29	29181	PGSC0003DMG400027771,PGSC0003DMG400009051,PGSC0003DMG400007819,PGSC0003DMG400022507
GO:0004427	inorganic diphosphatase activity	molecular_function	0.29398	1	4	2644	28	29181	PGSC0003DMG400007913,PGSC0003DMG400008932,PGSC0003DMG400023912,PGSC0003DMG400026784
GO:0005882	intermediate filament	cellular_component	0.29525	1	11	2644	92	29181	PGSC0003DMG400017100,PGSC0003DMG400013714,PGSC0003DMG401023504,PGSC0003DMG400000729,PGSC0003DMG400014854,PGSC0003DMG400004800,PGSC0003DMG400011322,PGSC0003DMG400022026,PGSC0003DMG400009177,PGSC0003DMG402002121,Novel01717
GO:0045111	intermediate filament cytoskeleton	cellular_component	0.29525	1	11	2644	92	29181	Novel01717,PGSC0003DMG402002121,PGSC0003DMG400009177,PGSC0003DMG400022026,PGSC0003DMG400011322,PGSC0003DMG400004800,PGSC0003DMG400014854,PGSC0003DMG400000729,PGSC0003DMG401023504,PGSC0003DMG400013714,PGSC0003DMG400017100
GO:0043015	gamma-tubulin binding	molecular_function	0.29657	1	2	2644	12	29181	PGSC0003DMG400014854,PGSC0003DMG400001326
GO:0045226	extracellular polysaccharide biosynthetic process	biological_process	0.29736	1	3	2644	21	29181	PGSC0003DMG400002292,PGSC0003DMG400007965,PGSC0003DMG400010833
GO:0045227	capsule polysaccharide biosynthetic process	biological_process	0.29736	1	3	2644	21	29181	PGSC0003DMG400002292,PGSC0003DMG400007965,PGSC0003DMG400010833
GO:0045230	capsule organization	biological_process	0.29736	1	3	2644	21	29181	PGSC0003DMG400007965,PGSC0003DMG400002292,PGSC0003DMG400010833
GO:0046379	extracellular polysaccharide metabolic process	biological_process	0.29736	1	3	2644	21	29181	PGSC0003DMG400010833,PGSC0003DMG400002292,PGSC0003DMG400007965
GO:0004866	endopeptidase inhibitor activity	molecular_function	0.29856	1	21	2644	225	29181	PGSC0003DMG400030593,PGSC0003DMG400006157,PGSC0003DMG400010149,PGSC0003DMG400008945,PGSC0003DMG400029323,PGSC0003DMG400002690,PGSC0003DMG400003537,PGSC0003DMG400031075,PGSC0003DMG401029222,PGSC0003DMG400002567,PGSC0003DMG400002703,PGSC0003DMG400010131,PGSC0003DMG400000912,PGSC0003DMG400028310,PGSC0003DMG400008460,PGSC0003DMG400007626,PGSC0003DMG401019427,PGSC0003DMG402030499,PGSC0003DMG400027053,…
GO:0061135	endopeptidase regulator activity	molecular_function	0.29856	1	21	2644	225	29181	PGSC0003DMG401029222,PGSC0003DMG400003537,PGSC0003DMG400002690,PGSC0003DMG400031075,PGSC0003DMG400008945,PGSC0003DMG400010149,PGSC0003DMG400029323,PGSC0003DMG400006157,PGSC0003DMG400030593,PGSC0003DMG400027053,PGSC0003DMG400001438,PGSC0003DMG400027052,PGSC0003DMG400008460,PGSC0003DMG402030499,PGSC0003DMG400007626,PGSC0003DMG401019427,PGSC0003DMG400028310,PGSC0003DMG400000912,PGSC0003DMG400002703,…
GO:0000726	non-recombinational repair	biological_process	0.29869	1	5	2644	39	29181	PGSC0003DMG400007199,PGSC0003DMG400023833,PGSC0003DMG400021676,PGSC0003DMG400014055,PGSC0003DMG400029871
GO:0046474	glycerophospholipid biosynthetic process	biological_process	0.29925	1	13	2644	113	29181	PGSC0003DMG400002204,PGSC0003DMG400018670,PGSC0003DMG400022026,PGSC0003DMG400009405,PGSC0003DMG400006021,PGSC0003DMG400021558,PGSC0003DMG400016649,PGSC0003DMG401018740,PGSC0003DMG400017627,PGSC0003DMG400015749,PGSC0003DMG400026516,PGSC0003DMG401031070,PGSC0003DMG400001580
GO:0006836	neurotransmitter transport	biological_process	0.29951	1	2	2644	11	29181	PGSC0003DMG400030422,PGSC0003DMG400016891
GO:0000139	Golgi membrane	cellular_component	0.29954	1	15	2644	132	29181	PGSC0003DMG400029576,PGSC0003DMG400015575,Novel01399,PGSC0003DMG400012807,PGSC0003DMG400025931,PGSC0003DMG400016790,PGSC0003DMG400030082,PGSC0003DMG400028234,PGSC0003DMG400009887,PGSC0003DMG400016649,Novel00909,PGSC0003DMG400002133,PGSC0003DMG400011249,PGSC0003DMG400021023,PGSC0003DMG400021614
GO:0019075	virus maturation	biological_process	0.30015	1	1	2644	3	29181	PGSC0003DMG400022311
GO:0046797	viral procapsid maturation	biological_process	0.30015	1	1	2644	3	29181	PGSC0003DMG400022311
GO:0044249	cellular biosynthetic process	biological_process	0.30017	1	768	2644	8109	29181	PGSC0003DMG400017824,PGSC0003DMG400031778,PGSC0003DMG400030399,PGSC0003DMG400018618,PGSC0003DMG400011167,PGSC0003DMG400022103,PGSC0003DMG401023644,PGSC0003DMG400010999,PGSC0003DMG400008538,PGSC0003DMG400033906,PGSC0003DMG400003122,PGSC0003DMG400015850,PGSC0003DMG400015405,PGSC0003DMG400022120,PGSC0003DMG400005737,PGSC0003DMG400018081,PGSC0003DMG400007373,PGSC0003DMG400027086,PGSC0003DMG400011810,…
GO:0032507	maintenance of protein location in cell	biological_process	0.30032	1	7	2644	55	29181	PGSC0003DMG400004437,PGSC0003DMG400004746,PGSC0003DMG400020169,PGSC0003DMG400030474,PGSC0003DMG400029948,PGSC0003DMG400028904,Novel01650
GO:0045185	maintenance of protein location	biological_process	0.30032	1	7	2644	55	29181	PGSC0003DMG400030474,PGSC0003DMG400029948,Novel01650,PGSC0003DMG400028904,PGSC0003DMG400004437,PGSC0003DMG400004746,PGSC0003DMG400020169
GO:0051651	maintenance of location in cell	biological_process	0.30032	1	7	2644	55	29181	PGSC0003DMG400004437,PGSC0003DMG400004746,PGSC0003DMG400020169,PGSC0003DMG400029948,PGSC0003DMG400030474,Novel01650,PGSC0003DMG400028904
GO:0050532	2-phosphosulfolactate phosphatase activity	molecular_function	0.30044	1	1	2644	4	29181	PGSC0003DMG400026384
GO:0030176	integral component of endoplasmic reticulum membrane	cellular_component	0.3016	1	12	2644	111	29181	PGSC0003DMG400043827,PGSC0003DMG400013474,PGSC0003DMG400014173,PGSC0003DMG400009180,PGSC0003DMG400003487,PGSC0003DMG400024615,PGSC0003DMG402013278,PGSC0003DMG400024591,PGSC0003DMG400009454,PGSC0003DMG400001924,PGSC0003DMG400004696,PGSC0003DMG400006663
GO:0031227	intrinsic component of endoplasmic reticulum membrane	cellular_component	0.3016	1	12	2644	111	29181	PGSC0003DMG400024591,PGSC0003DMG402013278,PGSC0003DMG400009180,PGSC0003DMG400024615,PGSC0003DMG400003487,PGSC0003DMG400006663,PGSC0003DMG400009454,PGSC0003DMG400004696,PGSC0003DMG400001924,PGSC0003DMG400043827,PGSC0003DMG400014173,PGSC0003DMG400013474
GO:0070071	proton-transporting two-sector ATPase complex assembly	biological_process	0.30233	1	4	2644	32	29181	PGSC0003DMG400008141,PGSC0003DMG400000090,PGSC0003DMG400014183,PGSC0003DMG400026155
GO:0002253	activation of immune response	biological_process	0.30328	1	4	2644	30	29181	PGSC0003DMG400011246,PGSC0003DMG400000421,PGSC0003DMG400027086,PGSC0003DMG400009900
GO:0003864	3-methyl-2-oxobutanoate hydroxymethyltransferase activity	molecular_function	0.3035	1	1	2644	4	29181	PGSC0003DMG400002011
GO:0006083	acetate metabolic process	biological_process	0.30353	1	4	2644	26	29181	Novel00852,PGSC0003DMG400012802,PGSC0003DMG400006270,PGSC0003DMG400009956
GO:0005185	neurohypophyseal hormone activity	molecular_function	0.30424	1	3	2644	21	29181	PGSC0003DMG400027168,PGSC0003DMG400021582,PGSC0003DMG400008371
GO:0042559	pteridine-containing compound biosynthetic process	biological_process	0.30505	1	8	2644	69	29181	PGSC0003DMG400004572,PGSC0003DMG400023608,PGSC0003DMG400018793,PGSC0003DMG402028101,PGSC0003DMG400005246,Novel01240,PGSC0003DMG400001444,PGSC0003DMG400011038
GO:0008645	hexose transport	biological_process	0.30524	1	3	2644	21	29181	PGSC0003DMG400026246,PGSC0003DMG400032789,PGSC0003DMG402005074
GO:0001653	peptide receptor activity	molecular_function	0.3061	1	4	2644	28	29181	PGSC0003DMG400017204,PGSC0003DMG400006945,PGSC0003DMG400006088,PGSC0003DMG400016655
GO:0008528	G-protein coupled peptide receptor activity	molecular_function	0.3061	1	4	2644	28	29181	PGSC0003DMG400006945,PGSC0003DMG400016655,PGSC0003DMG400006088,PGSC0003DMG400017204
GO:0005253	anion channel activity	molecular_function	0.30622	1	4	2644	28	29181	PGSC0003DMG400031145,PGSC0003DMG400024904,PGSC0003DMG400002730,PGSC0003DMG402031322
GO:0008009	chemokine activity	molecular_function	0.30635	1	2	2644	12	29181	PGSC0003DMG400012034,PGSC0003DMG402018530
GO:0042379	chemokine receptor binding	molecular_function	0.30635	1	2	2644	12	29181	PGSC0003DMG402018530,PGSC0003DMG400012034
GO:0030284	estrogen receptor activity	molecular_function	0.30738	1	2	2644	11	29181	PGSC0003DMG400004899,PGSC0003DMG400030840
GO:0000155	phosphorelay sensor kinase activity	molecular_function	0.30842	1	13	2644	117	29181	PGSC0003DMG401031064,PGSC0003DMG400027954,PGSC0003DMG400017824,PGSC0003DMG400031250,PGSC0003DMG400014442,PGSC0003DMG400003574,PGSC0003DMG400011246,PGSC0003DMG400014183,PGSC0003DMG400024909,PGSC0003DMG400004643,PGSC0003DMG400028213,PGSC0003DMG400000415,PGSC0003DMG400001854
GO:0032561	guanyl ribonucleotide binding	molecular_function	0.30882	1	86	2644	810	29181	PGSC0003DMG400002613,PGSC0003DMG400005048,PGSC0003DMG400013442,PGSC0003DMG400001430,PGSC0003DMG400020294,PGSC0003DMG400010314,PGSC0003DMG400026456,PGSC0003DMG401013112,PGSC0003DMG400016395,PGSC0003DMG400002703,PGSC0003DMG403024882,PGSC0003DMG400010126,Novel01614,PGSC0003DMG402007810,PGSC0003DMG400003889,PGSC0003DMG400003583,PGSC0003DMG401029631,PGSC0003DMG400017317,PGSC0003DMG400024909,PGSC0003DM…
GO:0015925	galactosidase activity	molecular_function	0.30883	1	6	2644	45	29181	PGSC0003DMG400008553,PGSC0003DMG400015211,PGSC0003DMG400003537,PGSC0003DMG400001459,PGSC0003DMG400006270,PGSC0003DMG400024060
GO:0016247	channel regulator activity	molecular_function	0.3089	1	24	2644	236	29181	PGSC0003DMG402018777,PGSC0003DMG400014173,PGSC0003DMG400026393,PGSC0003DMG400014163,PGSC0003DMG400020443,PGSC0003DMG400013977,PGSC0003DMG400002518,PGSC0003DMG400028238,PGSC0003DMG400024511,PGSC0003DMG400022026,PGSC0003DMG400030229,PGSC0003DMG400022639,PGSC0003DMG400026304,Novel01511,PGSC0003DMG400015132,PGSC0003DMG400030882,PGSC0003DMG400020742,PGSC0003DMG400021091,PGSC0003DMG400031755,PGSC0003DM…
GO:0016853	isomerase activity	molecular_function	0.30905	1	56	2644	548	29181	PGSC0003DMG400022318,PGSC0003DMG400021264,PGSC0003DMG400005961,PGSC0003DMG400024998,PGSC0003DMG402001316,PGSC0003DMG400018081,PGSC0003DMG400003896,PGSC0003DMG400026393,PGSC0003DMG400026073,PGSC0003DMG400020474,PGSC0003DMG400033063,PGSC0003DMG402008890,PGSC0003DMG400012440,PGSC0003DMG400000211,PGSC0003DMG400002903,PGSC0003DMG400023964,PGSC0003DMG400018987,PGSC0003DMG400012642,PGSC0003DMG400025171,…
GO:0031647	regulation of protein stability	biological_process	0.3091	1	4	2644	29	29181	PGSC0003DMG400021307,PGSC0003DMG400030964,PGSC0003DMG400022507,PGSC0003DMG400028127
GO:0050821	protein stabilization	biological_process	0.3091	1	4	2644	29	29181	PGSC0003DMG400022507,PGSC0003DMG400028127,PGSC0003DMG400030964,PGSC0003DMG400021307
GO:0003013	circulatory system process	biological_process	0.30916	1	5	2644	37	29181	PGSC0003DMG400013579,PGSC0003DMG400032778,PGSC0003DMG400012550,PGSC0003DMG400032789,PGSC0003DMG400014168
GO:0003018	vascular process in circulatory system	biological_process	0.30916	1	5	2644	37	29181	PGSC0003DMG400013579,PGSC0003DMG400032778,PGSC0003DMG400012550,PGSC0003DMG400032789,PGSC0003DMG400014168
GO:0008015	blood circulation	biological_process	0.30916	1	5	2644	37	29181	PGSC0003DMG400013579,PGSC0003DMG400032778,PGSC0003DMG400012550,PGSC0003DMG400032789,PGSC0003DMG400014168
GO:0035150	regulation of tube size	biological_process	0.30916	1	5	2644	37	29181	PGSC0003DMG400014168,PGSC0003DMG400032789,PGSC0003DMG400012550,PGSC0003DMG400032778,PGSC0003DMG400013579
GO:0050880	regulation of blood vessel size	biological_process	0.30916	1	5	2644	37	29181	PGSC0003DMG400012550,PGSC0003DMG400014168,PGSC0003DMG400032789,PGSC0003DMG400013579,PGSC0003DMG400032778
GO:1903522	regulation of blood circulation	biological_process	0.30916	1	5	2644	37	29181	PGSC0003DMG400014168,PGSC0003DMG400032789,PGSC0003DMG400012550,PGSC0003DMG400032778,PGSC0003DMG400013579
GO:0016818	hydrolase activity, acting on acid anhydrides, in phosphorus-containing anhydrides	molecular_function	0.31089	1	187	2644	1853	29181	PGSC0003DMG400011837,PGSC0003DMG400020850,PGSC0003DMG400010454,PGSC0003DMG400030965,PGSC0003DMG400015489,PGSC0003DMG400007999,PGSC0003DMG401013112,PGSC0003DMG400003890,PGSC0003DMG400034688,PGSC0003DMG401026043,PGSC0003DMG400029788,PGSC0003DMG400008308,PGSC0003DMG400026278,PGSC0003DMG400014248,PGSC0003DMG400001326,PGSC0003DMG400022399,PGSC0003DMG400009529,PGSC0003DMG402002121,PGSC0003DMG400001525,…
GO:0004113	2',3'-cyclic-nucleotide 3'-phosphodiesterase activity	molecular_function	0.31111	1	1	2644	4	29181	PGSC0003DMG400001752
GO:0006302	double-strand break repair	biological_process	0.31153	1	10	2644	90	29181	PGSC0003DMG400029871,PGSC0003DMG400021676,PGSC0003DMG400030029,PGSC0003DMG400007199,PGSC0003DMG400007150,PGSC0003DMG400023833,PGSC0003DMG400014055,PGSC0003DMG400026523,PGSC0003DMG400011042,PGSC0003DMG400033637
GO:0010927	cellular component assembly involved in morphogenesis	biological_process	0.31186	1	3	2644	21	29181	PGSC0003DMG400008956,PGSC0003DMG400001433,PGSC0003DMG400022888
GO:0042384	cilium assembly	biological_process	0.31186	1	3	2644	21	29181	PGSC0003DMG400022888,PGSC0003DMG400001433,PGSC0003DMG400008956
GO:0060271	cilium morphogenesis	biological_process	0.31186	1	3	2644	21	29181	PGSC0003DMG400001433,PGSC0003DMG400008956,PGSC0003DMG400022888
GO:1901617	organic hydroxy compound biosynthetic process	biological_process	0.31228	1	5	2644	40	29181	PGSC0003DMG400010076,PGSC0003DMG400029730,PGSC0003DMG400016535,PGSC0003DMG400016878,PGSC0003DMG400003792
GO:0005201	extracellular matrix structural constituent	molecular_function	0.31249	1	4	2644	32	29181	PGSC0003DMG400010092,PGSC0003DMG400031262,PGSC0003DMG400018583,PGSC0003DMG400028124
GO:0030054	cell junction	cellular_component	0.31281	1	7	2644	57	29181	PGSC0003DMG400007462,PGSC0003DMG401003156,PGSC0003DMG400009282,PGSC0003DMG400002396,PGSC0003DMG400000376,PGSC0003DMG400024596,PGSC0003DMG402003179
GO:0004470	malic enzyme activity	molecular_function	0.3131	1	3	2644	19	29181	PGSC0003DMG400002612,PGSC0003DMG400030121,PGSC0003DMG400026456
GO:0004471	malate dehydrogenase (decarboxylating) (NAD+) activity	molecular_function	0.3131	1	3	2644	19	29181	PGSC0003DMG400026456,PGSC0003DMG400002612,PGSC0003DMG400030121
GO:0031411	gas vesicle	cellular_component	0.31413	1	3	2644	21	29181	PGSC0003DMG400006861,PGSC0003DMG400010859,PGSC0003DMG400004628
GO:0009636	response to toxic substance	biological_process	0.31497	1	14	2644	123	29181	PGSC0003DMG400014843,PGSC0003DMG400022506,PGSC0003DMG400007288,PGSC0003DMG400012516,PGSC0003DMG400011195,PGSC0003DMG400022276,PGSC0003DMG400019201,PGSC0003DMG400032233,PGSC0003DMG400010794,PGSC0003DMG400017494,PGSC0003DMG400017678,PGSC0003DMG400017350,PGSC0003DMG400023264,PGSC0003DMG400006391
GO:0042262	DNA protection	biological_process	0.31545	1	3	2644	21	29181	PGSC0003DMG400020720,PGSC0003DMG400009887,PGSC0003DMG401009684
GO:0051346	negative regulation of hydrolase activity	biological_process	0.31615	1	5	2644	41	29181	PGSC0003DMG400008000,PGSC0003DMG400027269,PGSC0003DMG400026356,PGSC0003DMG400018119,PGSC0003DMG400012451
GO:0015696	ammonium transport	biological_process	0.31654	1	4	2644	29	29181	PGSC0003DMG400028137,PGSC0003DMG400001508,PGSC0003DMG400030453,PGSC0003DMG401015894
GO:0009916	alternative oxidase activity	molecular_function	0.31689	1	2	2644	12	29181	PGSC0003DMG400007613,PGSC0003DMG400007614
GO:0016125	sterol metabolic process	biological_process	0.31711	1	3	2644	20	29181	PGSC0003DMG400010076,PGSC0003DMG400030496,PGSC0003DMG400003792
GO:0006487	protein N-linked glycosylation	biological_process	0.31756	1	3	2644	20	29181	PGSC0003DMG401014605,PGSC0003DMG400027080,PGSC0003DMG400026456
GO:0009289	pilus	cellular_component	0.31823	1	4	2644	28	29181	PGSC0003DMG400024208,PGSC0003DMG400004318,PGSC0003DMG400022276,PGSC0003DMG400016529
GO:0045893	positive regulation of transcription, DNA-templated	biological_process	0.31918	1	14	2644	128	29181	PGSC0003DMG400022507,PGSC0003DMG400022569,PGSC0003DMG400027168,PGSC0003DMG400030560,PGSC0003DMG400024511,PGSC0003DMG400024310,Novel01580,PGSC0003DMG400002927,PGSC0003DMG400022038,PGSC0003DMG401033880,PGSC0003DMG400008358,PGSC0003DMG400022063,PGSC0003DMG400028929,Novel00078
GO:0045935	positive regulation of nucleobase-containing compound metabolic process	biological_process	0.31918	1	14	2644	128	29181	PGSC0003DMG400024310,PGSC0003DMG400030560,PGSC0003DMG400024511,PGSC0003DMG400022569,PGSC0003DMG400022507,PGSC0003DMG400027168,Novel00078,PGSC0003DMG400028929,PGSC0003DMG400022063,PGSC0003DMG400002927,PGSC0003DMG400008358,PGSC0003DMG400022038,PGSC0003DMG401033880,Novel01580
GO:0051254	positive regulation of RNA metabolic process	biological_process	0.31918	1	14	2644	128	29181	PGSC0003DMG400030560,PGSC0003DMG400024511,PGSC0003DMG400022507,PGSC0003DMG400022569,PGSC0003DMG400027168,PGSC0003DMG400024310,Novel01580,PGSC0003DMG400022063,PGSC0003DMG400028929,Novel00078,PGSC0003DMG401033880,PGSC0003DMG400002927,PGSC0003DMG400022038,PGSC0003DMG400008358
GO:1902680	positive regulation of RNA biosynthetic process	biological_process	0.31918	1	14	2644	128	29181	PGSC0003DMG400024310,PGSC0003DMG400024511,PGSC0003DMG400030560,PGSC0003DMG400027168,PGSC0003DMG400022569,PGSC0003DMG400022507,PGSC0003DMG400022063,Novel00078,PGSC0003DMG400028929,PGSC0003DMG400022038,PGSC0003DMG400002927,PGSC0003DMG401033880,PGSC0003DMG400008358,Novel01580
GO:1903508	positive regulation of nucleic acid-templated transcription	biological_process	0.31918	1	14	2644	128	29181	PGSC0003DMG400024310,PGSC0003DMG400027168,PGSC0003DMG400022569,PGSC0003DMG400022507,PGSC0003DMG400024511,PGSC0003DMG400030560,PGSC0003DMG400002927,PGSC0003DMG401033880,PGSC0003DMG400008358,PGSC0003DMG400022038,PGSC0003DMG400028929,PGSC0003DMG400022063,Novel00078,Novel01580
GO:0009161	ribonucleoside monophosphate metabolic process	biological_process	0.31966	1	49	2644	491	29181	PGSC0003DMG400021322,PGSC0003DMG400023464,PGSC0003DMG400000421,PGSC0003DMG400012616,PGSC0003DMG400015276,PGSC0003DMG400016918,PGSC0003DMG402031322,PGSC0003DMG400019247,PGSC0003DMG400002852,PGSC0003DMG400011044,PGSC0003DMG400021264,PGSC0003DMG400010084,PGSC0003DMG400002497,PGSC0003DMG400000301,PGSC0003DMG400009154,PGSC0003DMG400007913,PGSC0003DMG400021818,PGSC0003DMG400023039,PGSC0003DMG400008751,…
GO:0051051	negative regulation of transport	biological_process	0.32071	1	4	2644	30	29181	PGSC0003DMG400026246,PGSC0003DMG402005074,PGSC0003DMG400032789,PGSC0003DMG400021091
GO:0009116	nucleoside metabolic process	biological_process	0.32141	1	59	2644	593	29181	PGSC0003DMG400005494,PGSC0003DMG400029085,PGSC0003DMG400028842,PGSC0003DMG400001656,PGSC0003DMG401017657,PGSC0003DMG401033880,PGSC0003DMG400004449,PGSC0003DMG400002675,PGSC0003DMG400029087,PGSC0003DMG400011578,PGSC0003DMG400012910,PGSC0003DMG400026342,PGSC0003DMG400018150,PGSC0003DMG400021686,Novel02377,PGSC0003DMG400018635,PGSC0003DMG400018535,PGSC0003DMG400030968,PGSC0003DMG400033054,PGSC0003DM…
GO:0019203	carbohydrate phosphatase activity	molecular_function	0.32141	1	4	2644	29	29181	PGSC0003DMG400010788,PGSC0003DMG400020287,PGSC0003DMG402014514,PGSC0003DMG400030950
GO:0050308	sugar-phosphatase activity	molecular_function	0.32141	1	4	2644	29	29181	PGSC0003DMG400020287,PGSC0003DMG400010788,PGSC0003DMG400030950,PGSC0003DMG402014514
GO:0004506	squalene monooxygenase activity	molecular_function	0.32209	1	2	2644	14	29181	PGSC0003DMG400004608,PGSC0003DMG400026225
GO:0034464	BBSome	cellular_component	0.32231	1	3	2644	21	29181	PGSC0003DMG400001433,PGSC0003DMG400008956,PGSC0003DMG400022888
GO:0006508	proteolysis	biological_process	0.32237	1	151	2644	1534	29181	PGSC0003DMG400003656,PGSC0003DMG400027954,PGSC0003DMG402019187,Novel00376,PGSC0003DMG400000431,PGSC0003DMG400004899,PGSC0003DMG400005339,PGSC0003DMG400002613,PGSC0003DMG400029323,PGSC0003DMG400013714,Novel02259,PGSC0003DMG400028102,PGSC0003DMG400020622,PGSC0003DMG400021163,PGSC0003DMG400031845,PGSC0003DMG400022026,PGSC0003DMG400008182,PGSC0003DMG400026229,PGSC0003DMG400020441,PGSC0003DMG400002904…
GO:0009372	quorum sensing	biological_process	0.32246	1	5	2644	39	29181	PGSC0003DMG400030551,PGSC0003DMG400001854,PGSC0003DMG400024998,PGSC0003DMG401017590,PGSC0003DMG400008945
GO:0048872	homeostasis of number of cells	biological_process	0.32246	1	5	2644	39	29181	PGSC0003DMG400008945,PGSC0003DMG400030551,PGSC0003DMG400001854,PGSC0003DMG401017590,PGSC0003DMG400024998
GO:0048874	homeostasis of number of cells in a free-living population	biological_process	0.32246	1	5	2644	39	29181	PGSC0003DMG400008945,PGSC0003DMG400030551,PGSC0003DMG400001854,PGSC0003DMG400024998,PGSC0003DMG401017590
GO:0010923	negative regulation of phosphatase activity	biological_process	0.32421	1	1	2644	4	29181	PGSC0003DMG400018119
GO:0035305	negative regulation of dephosphorylation	biological_process	0.32421	1	1	2644	4	29181	PGSC0003DMG400018119
GO:0035308	negative regulation of protein dephosphorylation	biological_process	0.32421	1	1	2644	4	29181	PGSC0003DMG400018119
GO:0016877	ligase activity, forming carbon-sulfur bonds	molecular_function	0.32437	1	7	2644	56	29181	PGSC0003DMG400006965,PGSC0003DMG400011721,PGSC0003DMG400015678,PGSC0003DMG400022200,Novel03619,PGSC0003DMG401012961,PGSC0003DMG400012903
GO:0032994	protein-lipid complex	cellular_component	0.32526	1	2	2644	12	29181	PGSC0003DMG400002932,PGSC0003DMG400018792
GO:0034358	plasma lipoprotein particle	cellular_component	0.32526	1	2	2644	12	29181	PGSC0003DMG400002932,PGSC0003DMG400018792
GO:0042627	chylomicron	cellular_component	0.32526	1	2	2644	12	29181	PGSC0003DMG400018792,PGSC0003DMG400002932
GO:1990777	lipoprotein particle	cellular_component	0.32526	1	2	2644	12	29181	PGSC0003DMG400002932,PGSC0003DMG400018792
GO:0006405	RNA export from nucleus	biological_process	0.32552	1	6	2644	49	29181	PGSC0003DMG400030405,PGSC0003DMG400012613,PGSC0003DMG400010444,PGSC0003DMG400025668,PGSC0003DMG400013975,PGSC0003DMG400003122
GO:0051338	regulation of transferase activity	biological_process	0.32636	1	8	2644	69	29181	PGSC0003DMG400006815,PGSC0003DMG400009051,PGSC0003DMG400022507,PGSC0003DMG400001326,PGSC0003DMG400027771,PGSC0003DMG400014854,PGSC0003DMG400015575,PGSC0003DMG400007819
GO:0000014	single-stranded DNA endodeoxyribonuclease activity	molecular_function	0.32648	1	1	2644	4	29181	PGSC0003DMG400006815
GO:0050829	defense response to Gram-negative bacterium	biological_process	0.32652	1	4	2644	31	29181	PGSC0003DMG400008938,PGSC0003DMG400006995,PGSC0003DMG401016434,PGSC0003DMG400011541
GO:0006948	induction by virus of host cell-cell fusion	biological_process	0.32717	1	2	2644	13	29181	PGSC0003DMG400028145,PGSC0003DMG400021331
GO:0006308	DNA catabolic process	biological_process	0.32795	1	4	2644	32	29181	PGSC0003DMG400031809,Novel03093,PGSC0003DMG400014560,PGSC0003DMG400007126
GO:0009891	positive regulation of biosynthetic process	biological_process	0.32837	1	15	2644	140	29181	PGSC0003DMG400027168,PGSC0003DMG400022507,PGSC0003DMG400022569,PGSC0003DMG400024511,PGSC0003DMG400030560,PGSC0003DMG400033906,PGSC0003DMG400024310,Novel01580,PGSC0003DMG400022038,PGSC0003DMG400002927,PGSC0003DMG400008358,PGSC0003DMG401033880,PGSC0003DMG400028929,Novel00078,PGSC0003DMG400022063
GO:0010557	positive regulation of macromolecule biosynthetic process	biological_process	0.32837	1	15	2644	140	29181	PGSC0003DMG400028929,Novel00078,PGSC0003DMG400022063,PGSC0003DMG400022038,PGSC0003DMG400002927,PGSC0003DMG400008358,PGSC0003DMG401033880,Novel01580,PGSC0003DMG400024310,PGSC0003DMG400030560,PGSC0003DMG400033906,PGSC0003DMG400024511,PGSC0003DMG400022507,PGSC0003DMG400022569,PGSC0003DMG400027168
GO:0031328	positive regulation of cellular biosynthetic process	biological_process	0.32837	1	15	2644	140	29181	PGSC0003DMG400024310,PGSC0003DMG400027168,PGSC0003DMG400022507,PGSC0003DMG400022569,PGSC0003DMG400024511,PGSC0003DMG400033906,PGSC0003DMG400030560,PGSC0003DMG401033880,PGSC0003DMG400002927,PGSC0003DMG400022038,PGSC0003DMG400008358,Novel00078,PGSC0003DMG400022063,PGSC0003DMG400028929,Novel01580
GO:0051173	positive regulation of nitrogen compound metabolic process	biological_process	0.32837	1	15	2644	140	29181	PGSC0003DMG400002927,PGSC0003DMG400008358,PGSC0003DMG400022038,PGSC0003DMG401033880,Novel00078,PGSC0003DMG400022063,PGSC0003DMG400028929,Novel01580,PGSC0003DMG400024310,PGSC0003DMG400022569,PGSC0003DMG400022507,PGSC0003DMG400027168,PGSC0003DMG400033906,PGSC0003DMG400030560,PGSC0003DMG400024511
GO:0002520	immune system development	biological_process	0.32953	1	2	2644	11	29181	PGSC0003DMG400017100,PGSC0003DMG403020240
GO:0046034	ATP metabolic process	biological_process	0.33028	1	45	2644	453	29181	Novel02377,PGSC0003DMG400011578,PGSC0003DMG400012910,PGSC0003DMG400029087,PGSC0003DMG400026342,PGSC0003DMG400021686,PGSC0003DMG400018150,PGSC0003DMG400001656,PGSC0003DMG401017657,PGSC0003DMG401033880,PGSC0003DMG400004449,PGSC0003DMG400002675,PGSC0003DMG400005494,PGSC0003DMG400028842,PGSC0003DMG400002690,PGSC0003DMG400018763,PGSC0003DMG402023631,PGSC0003DMG400030560,PGSC0003DMG400009529,PGSC0003DM…
GO:0032504	multicellular organism reproduction	biological_process	0.33217	1	19	2644	179	29181	PGSC0003DMG400021163,PGSC0003DMG400020622,PGSC0003DMG400006088,PGSC0003DMG400025750,PGSC0003DMG400012966,PGSC0003DMG400030337,PGSC0003DMG400030496,PGSC0003DMG400002613,PGSC0003DMG400030474,PGSC0003DMG400005426,PGSC0003DMG400007581,PGSC0003DMG400030918,PGSC0003DMG400006160,PGSC0003DMG400036493,PGSC0003DMG400008004,PGSC0003DMG400030902,PGSC0003DMG400015575,PGSC0003DMG400020158,PGSC0003DMG400000723
GO:0007167	enzyme linked receptor protein signaling pathway	biological_process	0.33234	1	3	2644	22	29181	PGSC0003DMG400006378,PGSC0003DMG400003248,PGSC0003DMG400017309
GO:0007169	transmembrane receptor protein tyrosine kinase signaling pathway	biological_process	0.33234	1	3	2644	22	29181	PGSC0003DMG400017309,PGSC0003DMG400003248,PGSC0003DMG400006378
GO:0000151	ubiquitin ligase complex	cellular_component	0.33281	1	39	2644	390	29181	PGSC0003DMG400029401,PGSC0003DMG400009025,PGSC0003DMG400015661,PGSC0003DMG400016326,PGSC0003DMG400017179,PGSC0003DMG400011326,PGSC0003DMG400000301,PGSC0003DMG400017055,PGSC0003DMG400012997,PGSC0003DMG400008916,PGSC0003DMG400004900,PGSC0003DMG400012034,PGSC0003DMG400032503,PGSC0003DMG400008945,PGSC0003DMG400010772,PGSC0003DMG400025033,PGSC0003DMG401012439,PGSC0003DMG400021373,PGSC0003DMG400021143,…
GO:0016813	hydrolase activity, acting on carbon-nitrogen (but not peptide) bonds, in linear amidines	molecular_function	0.33293	1	3	2644	22	29181	PGSC0003DMG400010231,PGSC0003DMG400002190,PGSC0003DMG400013879
GO:0008028	monocarboxylic acid transmembrane transporter activity	molecular_function	0.33312	1	2	2644	12	29181	PGSC0003DMG400013282,PGSC0003DMG400009074
GO:1901657	glycosyl compound metabolic process	biological_process	0.33343	1	59	2644	596	29181	PGSC0003DMG400030560,PGSC0003DMG402023631,PGSC0003DMG400006622,PGSC0003DMG400009529,PGSC0003DMG400006382,PGSC0003DMG400018763,PGSC0003DMG400002690,PGSC0003DMG400012276,PGSC0003DMG400024226,PGSC0003DMG400018635,PGSC0003DMG400033054,PGSC0003DMG400030968,PGSC0003DMG400018535,PGSC0003DMG400029087,PGSC0003DMG400011578,PGSC0003DMG400012910,PGSC0003DMG400018150,PGSC0003DMG400021686,PGSC0003DMG400026342,…
GO:0030411	scytalone dehydratase activity	molecular_function	0.33422	1	1	2644	4	29181	PGSC0003DMG400028234
GO:0009144	purine nucleoside triphosphate metabolic process	biological_process	0.33446	1	46	2644	464	29181	PGSC0003DMG400000301,PGSC0003DMG400009154,PGSC0003DMG400007913,PGSC0003DMG400023039,PGSC0003DMG400008751,PGSC0003DMG400030941,PGSC0003DMG400028177,PGSC0003DMG400015405,PGSC0003DMG400025171,PGSC0003DMG400027590,PGSC0003DMG400023464,PGSC0003DMG400021322,PGSC0003DMG400000421,PGSC0003DMG400015276,PGSC0003DMG400012616,PGSC0003DMG400016918,PGSC0003DMG402031322,PGSC0003DMG400019247,PGSC0003DMG400002852,…
GO:0009199	ribonucleoside triphosphate metabolic process	biological_process	0.33446	1	46	2644	464	29181	PGSC0003DMG400015276,PGSC0003DMG400012616,PGSC0003DMG400016918,PGSC0003DMG400002852,PGSC0003DMG400019247,PGSC0003DMG400011044,PGSC0003DMG402031322,PGSC0003DMG400021322,PGSC0003DMG400023464,PGSC0003DMG400000421,PGSC0003DMG400002497,PGSC0003DMG400010084,PGSC0003DMG400021264,PGSC0003DMG400023039,PGSC0003DMG400009154,PGSC0003DMG400000301,PGSC0003DMG400007913,PGSC0003DMG400027590,PGSC0003DMG400025171,…
GO:0009205	purine ribonucleoside triphosphate metabolic process	biological_process	0.33446	1	46	2644	464	29181	PGSC0003DMG400025171,PGSC0003DMG400027590,PGSC0003DMG400008751,PGSC0003DMG400028177,PGSC0003DMG400030941,PGSC0003DMG400015405,PGSC0003DMG400023039,PGSC0003DMG400000301,PGSC0003DMG400009154,PGSC0003DMG400007913,PGSC0003DMG400002497,PGSC0003DMG400021264,PGSC0003DMG400010084,PGSC0003DMG400015276,PGSC0003DMG400016918,PGSC0003DMG400012616,PGSC0003DMG402031322,PGSC0003DMG400002852,PGSC0003DMG400019247,…
GO:0005886	plasma membrane	cellular_component	0.33468	1	62	2644	609	29181	PGSC0003DMG400011721,PGSC0003DMG400015575,PGSC0003DMG400003792,Novel01649,PGSC0003DMG400027509,PGSC0003DMG400027699,PGSC0003DMG400014594,PGSC0003DMG400013213,PGSC0003DMG400021373,PGSC0003DMG402020908,PGSC0003DMG400027149,PGSC0003DMG400030474,PGSC0003DMG400001388,PGSC0003DMG400005160,PGSC0003DMG400020622,PGSC0003DMG400000359,Novel01650,PGSC0003DMG400013886,PGSC0003DMG400027381,PGSC0003DMG400012067…
GO:0042974	retinoic acid receptor binding	molecular_function	0.33502	1	1	2644	4	29181	PGSC0003DMG400012087
GO:0007340	acrosome reaction	biological_process	0.33532	1	4	2644	31	29181	PGSC0003DMG400020158,PGSC0003DMG400020622,PGSC0003DMG400036493,PGSC0003DMG400005426
GO:0017156	calcium ion-dependent exocytosis	biological_process	0.33532	1	4	2644	31	29181	PGSC0003DMG400005426,PGSC0003DMG400036493,PGSC0003DMG400020622,PGSC0003DMG400020158
GO:0048731	system development	biological_process	0.33561	1	16	2644	145	29181	PGSC0003DMG400022225,PGSC0003DMG400033650,PGSC0003DMG400016293,PGSC0003DMG403020240,PGSC0003DMG400010097,PGSC0003DMG400017100,PGSC0003DMG400020133,PGSC0003DMG400010092,PGSC0003DMG400003756,PGSC0003DMG402030499,PGSC0003DMG400021563,PGSC0003DMG400027523,PGSC0003DMG400011541,PGSC0003DMG400018583,PGSC0003DMG400027699,PGSC0003DMG400003266
GO:0031175	neuron projection development	biological_process	0.33674	1	8	2644	65	29181	PGSC0003DMG400010097,PGSC0003DMG400016293,PGSC0003DMG400027523,PGSC0003DMG400011541,PGSC0003DMG400021563,PGSC0003DMG400003756,PGSC0003DMG400022225,PGSC0003DMG402030499
GO:0048666	neuron development	biological_process	0.33674	1	8	2644	65	29181	PGSC0003DMG400021563,PGSC0003DMG400003756,PGSC0003DMG400022225,PGSC0003DMG402030499,PGSC0003DMG400010097,PGSC0003DMG400016293,PGSC0003DMG400027523,PGSC0003DMG400011541
GO:0006275	regulation of DNA replication	biological_process	0.3374	1	9	2644	76	29181	PGSC0003DMG400030432,PGSC0003DMG400031371,PGSC0003DMG400023975,PGSC0003DMG400022343,PGSC0003DMG400011044,PGSC0003DMG401004603,PGSC0003DMG401033880,PGSC0003DMG400028729,PGSC0003DMG400008358
GO:0005313	L-glutamate transmembrane transporter activity	molecular_function	0.3376	1	1	2644	4	29181	PGSC0003DMG400001410
GO:0015172	acidic amino acid transmembrane transporter activity	molecular_function	0.3376	1	1	2644	4	29181	PGSC0003DMG400001410
GO:0015501	glutamate:sodium symporter activity	molecular_function	0.3376	1	1	2644	4	29181	PGSC0003DMG400001410
GO:0015800	acidic amino acid transport	biological_process	0.3376	1	1	2644	4	29181	PGSC0003DMG400001410
GO:0015807	L-amino acid transport	biological_process	0.3376	1	1	2644	4	29181	PGSC0003DMG400001410
GO:0015813	L-glutamate transport	biological_process	0.3376	1	1	2644	4	29181	PGSC0003DMG400001410
GO:0017006	protein-tetrapyrrole linkage	biological_process	0.33816	1	2	2644	13	29181	PGSC0003DMG400011132,PGSC0003DMG400031043
GO:0070206	protein trimerization	biological_process	0.33823	1	7	2644	64	29181	PGSC0003DMG400024524,PGSC0003DMG400002539,PGSC0003DMG400018081,PGSC0003DMG400023555,PGSC0003DMG400001326,Novel01266,PGSC0003DMG400011167
GO:0004127	cytidylate kinase activity	molecular_function	0.33878	1	8	2644	66	29181	PGSC0003DMG400020294,PGSC0003DMG400028925,PGSC0003DMG400021265,PGSC0003DMG400016553,PGSC0003DMG401029631,PGSC0003DMG400001709,PGSC0003DMG400022268,PGSC0003DMG400001247
GO:0006886	intracellular protein transport	biological_process	0.3389	1	129	2644	1278	29181	PGSC0003DMG400013975,PGSC0003DMG400005696,PGSC0003DMG402020132,PGSC0003DMG400002190,PGSC0003DMG400012802,PGSC0003DMG400007597,PGSC0003DMG400028234,PGSC0003DMG400029797,PGSC0003DMG400021331,Novel02719,PGSC0003DMG400008945,PGSC0003DMG401025764,PGSC0003DMG400009049,PGSC0003DMG400033637,PGSC0003DMG400011365,PGSC0003DMG400028656,PGSC0003DMG400005668,PGSC0003DMG400016279,PGSC0003DMG400028310,PGSC0003DM…
GO:0009986	cell surface	cellular_component	0.33912	1	5	2644	36	29181	PGSC0003DMG400025668,PGSC0003DMG400010032,PGSC0003DMG400020335,PGSC0003DMG400011792,PGSC0003DMG400027014
GO:0051766	inositol trisphosphate kinase activity	molecular_function	0.33983	1	3	2644	20	29181	PGSC0003DMG400035836,PGSC0003DMG400014467,PGSC0003DMG400026225
GO:0006753	nucleoside phosphate metabolic process	biological_process	0.34103	1	72	2644	731	29181	PGSC0003DMG400002497,PGSC0003DMG400010084,PGSC0003DMG402028101,PGSC0003DMG400021264,PGSC0003DMG400027315,PGSC0003DMG400011044,PGSC0003DMG402031322,PGSC0003DMG400012616,PGSC0003DMG400015276,PGSC0003DMG400010485,PGSC0003DMG400022200,PGSC0003DMG400028904,Novel00931,PGSC0003DMG400001752,PGSC0003DMG400016553,PGSC0003DMG400001932,PGSC0003DMG400025171,PGSC0003DMG400030941,PGSC0003DMG400028177,Novel00282…
GO:0042325	regulation of phosphorylation	biological_process	0.34225	1	5	2644	41	29181	PGSC0003DMG400009051,PGSC0003DMG400007819,PGSC0003DMG400022507,PGSC0003DMG400027771,PGSC0003DMG400002852
GO:0006480	N-terminal protein amino acid methylation	biological_process	0.34237	1	4	2644	30	29181	PGSC0003DMG400008591,PGSC0003DMG400005749,PGSC0003DMG400000560,PGSC0003DMG400011266
GO:0031365	N-terminal protein amino acid modification	biological_process	0.34237	1	4	2644	30	29181	PGSC0003DMG400000560,PGSC0003DMG400011266,PGSC0003DMG400008591,PGSC0003DMG400005749
GO:0004061	arylformamidase activity	molecular_function	0.3435	1	1	2644	5	29181	PGSC0003DMG400023115
GO:0006096	glycolytic process	biological_process	0.34355	1	9	2644	78	29181	PGSC0003DMG400019247,PGSC0003DMG400011044,PGSC0003DMG400002675,PGSC0003DMG400005494,PGSC0003DMG400002690,PGSC0003DMG400025171,PGSC0003DMG400028177,PGSC0003DMG402023631,PGSC0003DMG400012910
GO:0006757	ATP generation from ADP	biological_process	0.34355	1	9	2644	78	29181	PGSC0003DMG400025171,PGSC0003DMG400002690,PGSC0003DMG400012910,PGSC0003DMG402023631,PGSC0003DMG400028177,PGSC0003DMG400002675,PGSC0003DMG400019247,PGSC0003DMG400011044,PGSC0003DMG400005494
GO:0009135	purine nucleoside diphosphate metabolic process	biological_process	0.34355	1	9	2644	78	29181	PGSC0003DMG400025171,PGSC0003DMG400002690,PGSC0003DMG402023631,PGSC0003DMG400028177,PGSC0003DMG400012910,PGSC0003DMG400019247,PGSC0003DMG400011044,PGSC0003DMG400002675,PGSC0003DMG400005494
GO:0009179	purine ribonucleoside diphosphate metabolic process	biological_process	0.34355	1	9	2644	78	29181	PGSC0003DMG402023631,PGSC0003DMG400028177,PGSC0003DMG400012910,PGSC0003DMG400025171,PGSC0003DMG400002690,PGSC0003DMG400005494,PGSC0003DMG400011044,PGSC0003DMG400019247,PGSC0003DMG400002675
GO:0009185	ribonucleoside diphosphate metabolic process	biological_process	0.34355	1	9	2644	78	29181	PGSC0003DMG400002690,PGSC0003DMG400025171,PGSC0003DMG400028177,PGSC0003DMG402023631,PGSC0003DMG400012910,PGSC0003DMG400011044,PGSC0003DMG400019247,PGSC0003DMG400002675,PGSC0003DMG400005494
GO:0046031	ADP metabolic process	biological_process	0.34355	1	9	2644	78	29181	PGSC0003DMG400012910,PGSC0003DMG402023631,PGSC0003DMG400028177,PGSC0003DMG400025171,PGSC0003DMG400002690,PGSC0003DMG400005494,PGSC0003DMG400002675,PGSC0003DMG400019247,PGSC0003DMG400011044
GO:0005520	insulin-like growth factor binding	molecular_function	0.34372	1	1	2644	4	29181	PGSC0003DMG400000890
GO:0001733	galactosylceramide sulfotransferase activity	molecular_function	0.34389	1	1	2644	4	29181	PGSC0003DMG400010430
GO:0050694	galactose 3-O-sulfotransferase activity	molecular_function	0.34389	1	1	2644	4	29181	PGSC0003DMG400010430
GO:0003910	DNA ligase (ATP) activity	molecular_function	0.34424	1	4	2644	34	29181	PGSC0003DMG400033685,PGSC0003DMG400016313,PGSC0003DMG403020240,Novel01126
GO:0009404	toxin metabolic process	biological_process	0.34483	1	10	2644	93	29181	PGSC0003DMG402023841,PGSC0003DMG400006270,PGSC0003DMG400025616,PGSC0003DMG400014295,PGSC0003DMG401011372,PGSC0003DMG400009925,PGSC0003DMG400026074,PGSC0003DMG400007791,PGSC0003DMG401029032,PGSC0003DMG400029591
GO:0009084	glutamine family amino acid biosynthetic process	biological_process	0.34555	1	5	2644	37	29181	PGSC0003DMG400008852,PGSC0003DMG400013235,PGSC0003DMG400012997,PGSC0003DMG400010485,PGSC0003DMG400014592
GO:0008324	cation transmembrane transporter activity	molecular_function	0.34558	1	147	2644	1538	29181	PGSC0003DMG400031832,PGSC0003DMG400028842,PGSC0003DMG400001656,PGSC0003DMG400001856,PGSC0003DMG400014843,PGSC0003DMG400011578,PGSC0003DMG400009177,PGSC0003DMG400030701,PGSC0003DMG400002133,PGSC0003DMG400016649,PGSC0003DMG400012434,PGSC0003DMG400013886,PGSC0003DMG400028422,PGSC0003DMG400009277,PGSC0003DMG400017226,PGSC0003DMG400010833,PGSC0003DMG400001508,PGSC0003DMG400025035,PGSC0003DMG400010174,…
GO:0017111	nucleoside-triphosphatase activity	molecular_function	0.34641	1	163	2644	1605	29181	PGSC0003DMG401026043,PGSC0003DMG400034688,PGSC0003DMG400008308,PGSC0003DMG400029788,PGSC0003DMG400020850,PGSC0003DMG400010454,PGSC0003DMG400011837,PGSC0003DMG401013112,PGSC0003DMG400007999,PGSC0003DMG400015489,PGSC0003DMG400030965,PGSC0003DMG400021556,PGSC0003DMG400001525,PGSC0003DMG400009529,PGSC0003DMG400003889,PGSC0003DMG402007810,PGSC0003DMG400004470,PGSC0003DMG400012206,PGSC0003DMG400026278,…
GO:0015708	silicate transport	biological_process	0.34658	1	1	2644	4	29181	PGSC0003DMG400026042
GO:0010833	telomere maintenance via telomere lengthening	biological_process	0.34698	1	1	2644	5	29181	PGSC0003DMG400020426
GO:0046933	proton-transporting ATP synthase activity, rotational mechanism	molecular_function	0.34752	1	6	2644	58	29181	PGSC0003DMG402023631,PGSC0003DMG400009529,PGSC0003DMG400006622,PGSC0003DMG400028842,PGSC0003DMG400027590,PGSC0003DMG400012616
GO:0008430	selenium binding	molecular_function	0.34761	1	1	2644	4	29181	PGSC0003DMG400006140
GO:0050661	NADP binding	molecular_function	0.34762	1	13	2644	121	29181	PGSC0003DMG400022026,PGSC0003DMG400004899,PGSC0003DMG400000404,PGSC0003DMG400030882,PGSC0003DMG400001932,Novel00385,PGSC0003DMG400027735,PGSC0003DMG400011195,PGSC0003DMG400012109,PGSC0003DMG400006270,Novel03619,PGSC0003DMG400025121,PGSC0003DMG400011238
GO:0000152	nuclear ubiquitin ligase complex	cellular_component	0.3478	1	37	2644	372	29181	PGSC0003DMG400008091,PGSC0003DMG400028200,PGSC0003DMG400020819,PGSC0003DMG400009405,PGSC0003DMG400030821,PGSC0003DMG400000359,PGSC0003DMG400012151,PGSC0003DMG400001677,PGSC0003DMG400005163,PGSC0003DMG402018777,PGSC0003DMG400033921,PGSC0003DMG401012439,PGSC0003DMG400025033,PGSC0003DMG400021373,PGSC0003DMG400009117,PGSC0003DMG400043193,PGSC0003DMG400021143,PGSC0003DMG400027099,PGSC0003DMG400042968,…
GO:0005680	anaphase-promoting complex	cellular_component	0.3478	1	37	2644	372	29181	PGSC0003DMG400032503,PGSC0003DMG400010772,PGSC0003DMG400008945,PGSC0003DMG400017055,PGSC0003DMG400012997,PGSC0003DMG400008916,PGSC0003DMG400004900,PGSC0003DMG400017179,PGSC0003DMG400016326,PGSC0003DMG400011326,PGSC0003DMG400000301,PGSC0003DMG400029401,PGSC0003DMG400009025,PGSC0003DMG400015661,PGSC0003DMG400000359,PGSC0003DMG400012151,PGSC0003DMG400001677,PGSC0003DMG402018777,PGSC0003DMG400005163,…
GO:0031461	cullin-RING ubiquitin ligase complex	cellular_component	0.3478	1	37	2644	372	29181	PGSC0003DMG400042968,PGSC0003DMG400043193,PGSC0003DMG400009117,PGSC0003DMG400021143,PGSC0003DMG400027099,PGSC0003DMG400021373,PGSC0003DMG401012439,PGSC0003DMG400025033,PGSC0003DMG400001719,PGSC0003DMG400012421,PGSC0003DMG400012569,PGSC0003DMG400015575,PGSC0003DMG400009405,PGSC0003DMG400030821,PGSC0003DMG400020819,PGSC0003DMG400028200,PGSC0003DMG400008091,PGSC0003DMG400033921,PGSC0003DMG400001677,…
GO:0016462	pyrophosphatase activity	molecular_function	0.34848	1	167	2644	1646	29181	PGSC0003DMG401013112,PGSC0003DMG400015489,PGSC0003DMG400030965,PGSC0003DMG400007999,PGSC0003DMG400011837,PGSC0003DMG400010454,PGSC0003DMG400020850,PGSC0003DMG400008308,PGSC0003DMG400029788,PGSC0003DMG401026043,PGSC0003DMG400034688,PGSC0003DMG400001326,PGSC0003DMG400014248,PGSC0003DMG400026278,PGSC0003DMG402007810,PGSC0003DMG400003889,PGSC0003DMG400004470,PGSC0003DMG400012206,PGSC0003DMG400021556,…
GO:0050792	regulation of viral process	biological_process	0.34858	1	5	2644	42	29181	PGSC0003DMG400028321,PGSC0003DMG400011015,PGSC0003DMG400020364,PGSC0003DMG400004274,PGSC0003DMG402007406
GO:0009101	glycoprotein biosynthetic process	biological_process	0.34893	1	16	2644	146	29181	PGSC0003DMG400017723,PGSC0003DMG400003313,PGSC0003DMG400015211,Novel01511,PGSC0003DMG400026229,PGSC0003DMG400027080,PGSC0003DMG400020351,PGSC0003DMG400028961,PGSC0003DMG400000060,PGSC0003DMG400009066,PGSC0003DMG400011347,PGSC0003DMG400021307,PGSC0003DMG400014847,PGSC0003DMG400023340,PGSC0003DMG400026456,PGSC0003DMG401014605
GO:0043240	Fanconi anaemia nuclear complex	cellular_component	0.34961	1	1	2644	4	29181	PGSC0003DMG400010415
GO:0008176	tRNA (guanine-N7-)-methyltransferase activity	molecular_function	0.34993	1	5	2644	39	29181	PGSC0003DMG400016168,PGSC0003DMG402030499,PGSC0003DMG400000850,PGSC0003DMG400005749,PGSC0003DMG400010428
GO:0000775	chromosome, centromeric region	cellular_component	0.3503	1	43	2644	443	29181	PGSC0003DMG400030000,PGSC0003DMG400004374,PGSC0003DMG400011167,PGSC0003DMG401023644,PGSC0003DMG400008434,Novel02473,PGSC0003DMG400000173,PGSC0003DMG400001057,PGSC0003DMG401024899,PGSC0003DMG400006621,PGSC0003DMG400018509,PGSC0003DMG400003422,PGSC0003DMG400004439,PGSC0003DMG400016529,PGSC0003DMG400008029,PGSC0003DMG400021331,PGSC0003DMG400027269,PGSC0003DMG400025989,PGSC0003DMG400000248,PGSC0003DM…
GO:0004013	adenosylhomocysteinase activity	molecular_function	0.3508	1	1	2644	5	29181	PGSC0003DMG400004572
GO:0016801	hydrolase activity, acting on ether bonds	molecular_function	0.3508	1	1	2644	5	29181	PGSC0003DMG400004572
GO:0016802	trialkylsulfonium hydrolase activity	molecular_function	0.3508	1	1	2644	5	29181	PGSC0003DMG400004572
GO:0016860	intramolecular oxidoreductase activity	molecular_function	0.35191	1	10	2644	89	29181	PGSC0003DMG400012910,PGSC0003DMG400021264,PGSC0003DMG400000211,PGSC0003DMG400025171,PGSC0003DMG400024998,PGSC0003DMG400030509,PGSC0003DMG400005961,PGSC0003DMG400027745,PGSC0003DMG400025005,PGSC0003DMG400026393
GO:0006621	protein retention in ER lumen	biological_process	0.35239	1	2	2644	13	29181	PGSC0003DMG400020169,PGSC0003DMG400004437
GO:0035437	maintenance of protein localization in endoplasmic reticulum	biological_process	0.35239	1	2	2644	13	29181	PGSC0003DMG400004437,PGSC0003DMG400020169
GO:0046923	ER retention sequence binding	molecular_function	0.35239	1	2	2644	13	29181	PGSC0003DMG400004437,PGSC0003DMG400020169
GO:0072595	maintenance of protein localization in organelle	biological_process	0.35239	1	2	2644	13	29181	PGSC0003DMG400020169,PGSC0003DMG400004437
GO:0003689	DNA clamp loader activity	molecular_function	0.3525	1	1	2644	4	29181	PGSC0003DMG400002190
GO:0005657	replication fork	cellular_component	0.3525	1	1	2644	4	29181	PGSC0003DMG400002190
GO:0005663	DNA replication factor C complex	cellular_component	0.3525	1	1	2644	4	29181	PGSC0003DMG400002190
GO:0033170	protein-DNA loading ATPase activity	molecular_function	0.3525	1	1	2644	4	29181	PGSC0003DMG400002190
GO:0010324	membrane invagination	biological_process	0.35294	1	1	2644	4	29181	PGSC0003DMG400007819
GO:0016237	microautophagy	biological_process	0.35294	1	1	2644	4	29181	PGSC0003DMG400007819
GO:0034448	EGO complex	cellular_component	0.35294	1	1	2644	4	29181	PGSC0003DMG400007819
GO:1902534	single-organism membrane invagination	biological_process	0.35294	1	1	2644	4	29181	PGSC0003DMG400007819
GO:0005057	receptor signaling protein activity	molecular_function	0.35339	1	15	2644	142	29181	PGSC0003DMG400014442,PGSC0003DMG400016143,PGSC0003DMG400003574,PGSC0003DMG400024909,PGSC0003DMG400014183,PGSC0003DMG400002567,PGSC0003DMG400011246,PGSC0003DMG401031064,PGSC0003DMG400031250,PGSC0003DMG400017824,PGSC0003DMG400027954,PGSC0003DMG400000415,PGSC0003DMG400001854,PGSC0003DMG400028213,PGSC0003DMG400004643
GO:0034613	cellular protein localization	biological_process	0.35359	1	142	2644	1415	29181	PGSC0003DMG400020287,PGSC0003DMG401000057,PGSC0003DMG400029948,PGSC0003DMG400007965,PGSC0003DMG400018921,PGSC0003DMG400001924,PGSC0003DMG400004007,Novel01650,PGSC0003DMG400021717,PGSC0003DMG400004746,PGSC0003DMG400010246,PGSC0003DMG400028374,PGSC0003DMG400014898,PGSC0003DMG400017167,PGSC0003DMG400021603,PGSC0003DMG400023130,PGSC0003DMG400015575,PGSC0003DMG400021331,PGSC0003DMG400029797,PGSC0003DM…
GO:0070727	cellular macromolecule localization	biological_process	0.35359	1	142	2644	1415	29181	PGSC0003DMG400000511,PGSC0003DMG400020294,PGSC0003DMG400010314,PGSC0003DMG400026456,PGSC0003DMG400005048,PGSC0003DMG400030474,PGSC0003DMG400013442,PGSC0003DMG400013213,PGSC0003DMG400004437,PGSC0003DMG400030058,PGSC0003DMG401027116,PGSC0003DMG400002291,PGSC0003DMG400013481,PGSC0003DMG400025117,PGSC0003DMG400028393,PGSC0003DMG400005163,PGSC0003DMG400024967,PGSC0003DMG400011133,PGSC0003DMG400018578,…
GO:0009539	photosystem II reaction center	cellular_component	0.35389	1	13	2644	118	29181	PGSC0003DMG400003707,PGSC0003DMG400003865,PGSC0003DMG400024586,PGSC0003DMG400012571,PGSC0003DMG400006021,PGSC0003DMG400003537,PGSC0003DMG401008816,PGSC0003DMG400030568,PGSC0003DMG400000161,PGSC0003DMG400024904,PGSC0003DMG400000766,PGSC0003DMG400010165,PGSC0003DMG400003574
GO:0045926	negative regulation of growth	biological_process	0.35414	1	1	2644	5	29181	PGSC0003DMG400000936
GO:0009294	DNA mediated transformation	biological_process	0.3543	1	2	2644	13	29181	PGSC0003DMG400022311,Novel03281
GO:0005388	calcium-transporting ATPase activity	molecular_function	0.3548	1	1	2644	4	29181	PGSC0003DMG400007300
GO:0008283	cell proliferation	biological_process	0.35485	1	6	2644	59	29181	PGSC0003DMG400015850,PGSC0003DMG400025117,PGSC0003DMG400033650,PGSC0003DMG400028267,PGSC0003DMG400002852,PGSC0003DMG400012543
GO:0051049	regulation of transport	biological_process	0.35615	1	9	2644	82	29181	PGSC0003DMG400026246,PGSC0003DMG400006663,PGSC0003DMG400000511,PGSC0003DMG400032789,PGSC0003DMG400029591,PGSC0003DMG400009180,PGSC0003DMG402005074,PGSC0003DMG400013474,PGSC0003DMG400021091
GO:0008907	integrase activity	molecular_function	0.3567	1	2	2644	12	29181	PGSC0003DMG400029837,PGSC0003DMG400006591
GO:0030291	protein serine/threonine kinase inhibitor activity	molecular_function	0.3569	1	4	2644	31	29181	PGSC0003DMG401013112,PGSC0003DMG400027771,PGSC0003DMG400022507,PGSC0003DMG400007819
GO:0006165	nucleoside diphosphate phosphorylation	biological_process	0.35774	1	10	2644	89	29181	PGSC0003DMG402023631,PGSC0003DMG400028177,PGSC0003DMG400012910,PGSC0003DMG400012276,PGSC0003DMG400002690,PGSC0003DMG400025171,PGSC0003DMG400005494,PGSC0003DMG400019247,PGSC0003DMG400011044,PGSC0003DMG400002675
GO:0046939	nucleotide phosphorylation	biological_process	0.35774	1	10	2644	89	29181	PGSC0003DMG400005494,PGSC0003DMG400019247,PGSC0003DMG400011044,PGSC0003DMG400002675,PGSC0003DMG402023631,PGSC0003DMG400028177,PGSC0003DMG400012910,PGSC0003DMG400025171,PGSC0003DMG400002690,PGSC0003DMG400012276
GO:0008241	peptidyl-dipeptidase activity	molecular_function	0.35798	1	1	2644	4	29181	PGSC0003DMG400022026
GO:0060966	regulation of gene silencing by RNA	biological_process	0.35811	1	2	2644	12	29181	PGSC0003DMG400001907,PGSC0003DMG400028234
GO:0060967	negative regulation of gene silencing by RNA	biological_process	0.35811	1	2	2644	12	29181	PGSC0003DMG400028234,PGSC0003DMG400001907
GO:0060968	regulation of gene silencing	biological_process	0.35811	1	2	2644	12	29181	PGSC0003DMG400001907,PGSC0003DMG400028234
GO:0060969	negative regulation of gene silencing	biological_process	0.35811	1	2	2644	12	29181	PGSC0003DMG400001907,PGSC0003DMG400028234
GO:0017025	TBP-class protein binding	molecular_function	0.359	1	3	2644	22	29181	PGSC0003DMG400024698,PGSC0003DMG401008136,PGSC0003DMG400022318
GO:0006325	chromatin organization	biological_process	0.35943	1	31	2644	315	29181	PGSC0003DMG400003890,PGSC0003DMG400008690,PGSC0003DMG400008685,PGSC0003DMG400038913,PGSC0003DMG400000729,PGSC0003DMG400023405,PGSC0003DMG401014249,PGSC0003DMG400002613,PGSC0003DMG400030337,PGSC0003DMG400028732,PGSC0003DMG400015213,PGSC0003DMG400006176,PGSC0003DMG400012286,PGSC0003DMG400027077,PGSC0003DMG400005092,PGSC0003DMG400022399,PGSC0003DMG400019535,PGSC0003DMG400019910,PGSC0003DMG400024208,…
GO:0098687	chromosomal region	cellular_component	0.35993	1	45	2644	466	29181	PGSC0003DMG400006621,PGSC0003DMG400018509,PGSC0003DMG400003422,PGSC0003DMG400004439,PGSC0003DMG400016529,PGSC0003DMG400020426,PGSC0003DMG400008029,PGSC0003DMG400021331,PGSC0003DMG400027269,PGSC0003DMG400030000,PGSC0003DMG400004374,PGSC0003DMG400011167,PGSC0003DMG401023644,PGSC0003DMG400008690,Novel02473,PGSC0003DMG400008434,PGSC0003DMG400000173,PGSC0003DMG400001057,PGSC0003DMG401024899,PGSC0003DM…
GO:0009123	nucleoside monophosphate metabolic process	biological_process	0.36006	1	50	2644	511	29181	PGSC0003DMG400025171,PGSC0003DMG400027590,PGSC0003DMG400008751,PGSC0003DMG400030941,PGSC0003DMG400028177,PGSC0003DMG400015405,PGSC0003DMG400021818,PGSC0003DMG400023039,PGSC0003DMG400000301,PGSC0003DMG400009154,PGSC0003DMG400007913,PGSC0003DMG400002497,PGSC0003DMG400021264,PGSC0003DMG400010084,PGSC0003DMG400015276,PGSC0003DMG400016918,PGSC0003DMG400012616,PGSC0003DMG402031322,PGSC0003DMG400011044,…
GO:0016624	oxidoreductase activity, acting on the aldehyde or oxo group of donors, disulfide as acceptor	molecular_function	0.36076	1	3	2644	22	29181	PGSC0003DMG402013561,PGSC0003DMG400002921,PGSC0003DMG400024860
GO:0051641	cellular localization	biological_process	0.36081	1	192	2644	1932	29181	PGSC0003DMG400018250,PGSC0003DMG400014543,PGSC0003DMG400042273,PGSC0003DMG400025428,PGSC0003DMG400027063,PGSC0003DMG400004696,PGSC0003DMG400021439,PGSC0003DMG400023506,PGSC0003DMG400015749,PGSC0003DMG400024591,PGSC0003DMG400028633,Novel03389,PGSC0003DMG400013494,PGSC0003DMG400022911,PGSC0003DMG401023118,PGSC0003DMG400007316,PGSC0003DMG400015203,PGSC0003DMG400033029,PGSC0003DMG403006826,PGSC0003DM…
GO:0005581	collagen trimer	cellular_component	0.3609	1	2	2644	13	29181	PGSC0003DMG400031262,PGSC0003DMG400028124
GO:0009067	aspartate family amino acid biosynthetic process	biological_process	0.36196	1	10	2644	86	29181	PGSC0003DMG400028127,PGSC0003DMG400003755,PGSC0003DMG400027735,PGSC0003DMG400032250,PGSC0003DMG400010674,PGSC0003DMG400004800,PGSC0003DMG400015379,PGSC0003DMG400011218,PGSC0003DMG400000404,PGSC0003DMG400029938
GO:0045017	glycerolipid biosynthetic process	biological_process	0.36223	1	14	2644	128	29181	PGSC0003DMG400015749,PGSC0003DMG400017627,PGSC0003DMG400026516,PGSC0003DMG400001580,PGSC0003DMG401031070,PGSC0003DMG400022026,PGSC0003DMG400009405,PGSC0003DMG400025881,PGSC0003DMG400006021,PGSC0003DMG400002204,PGSC0003DMG400018670,PGSC0003DMG400021558,PGSC0003DMG400016649,PGSC0003DMG401018740
GO:0016769	transferase activity, transferring nitrogenous groups	molecular_function	0.3628	1	4	2644	29	29181	PGSC0003DMG400021866,PGSC0003DMG400004899,PGSC0003DMG400004643,PGSC0003DMG400022742
GO:0031345	negative regulation of cell projection organization	biological_process	0.36296	1	1	2644	4	29181	PGSC0003DMG400000376
GO:0048027	mRNA 5'-UTR binding	molecular_function	0.36296	1	1	2644	4	29181	PGSC0003DMG400000376
GO:1902116	negative regulation of organelle assembly	biological_process	0.36296	1	1	2644	4	29181	PGSC0003DMG400000376
GO:1902209	negative regulation of bacterial-type flagellum assembly	biological_process	0.36296	1	1	2644	4	29181	PGSC0003DMG400000376
GO:0008686	3,4-dihydroxy-2-butanone-4-phosphate synthase activity	molecular_function	0.36385	1	1	2644	4	29181	PGSC0003DMG400012571
GO:0009129	pyrimidine nucleoside monophosphate metabolic process	biological_process	0.36421	1	4	2644	34	29181	PGSC0003DMG400003803,PGSC0003DMG400021818,PGSC0003DMG400002932,PGSC0003DMG400020618
GO:0009130	pyrimidine nucleoside monophosphate biosynthetic process	biological_process	0.36421	1	4	2644	34	29181	PGSC0003DMG400003803,PGSC0003DMG400021818,PGSC0003DMG400002932,PGSC0003DMG400020618
GO:0009157	deoxyribonucleoside monophosphate biosynthetic process	biological_process	0.36421	1	4	2644	34	29181	PGSC0003DMG400003803,PGSC0003DMG400021818,PGSC0003DMG400002932,PGSC0003DMG400020618
GO:0009176	pyrimidine deoxyribonucleoside monophosphate metabolic process	biological_process	0.36421	1	4	2644	34	29181	PGSC0003DMG400020618,PGSC0003DMG400002932,PGSC0003DMG400021818,PGSC0003DMG400003803
GO:0009177	pyrimidine deoxyribonucleoside monophosphate biosynthetic process	biological_process	0.36421	1	4	2644	34	29181	PGSC0003DMG400002932,PGSC0003DMG400020618,PGSC0003DMG400003803,PGSC0003DMG400021818
GO:0009221	pyrimidine deoxyribonucleotide biosynthetic process	biological_process	0.36421	1	4	2644	34	29181	PGSC0003DMG400002932,PGSC0003DMG400020618,PGSC0003DMG400003803,PGSC0003DMG400021818
GO:0009263	deoxyribonucleotide biosynthetic process	biological_process	0.36421	1	4	2644	34	29181	PGSC0003DMG400003803,PGSC0003DMG400021818,PGSC0003DMG400002932,PGSC0003DMG400020618
GO:0009265	2'-deoxyribonucleotide biosynthetic process	biological_process	0.36421	1	4	2644	34	29181	PGSC0003DMG400002932,PGSC0003DMG400020618,PGSC0003DMG400003803,PGSC0003DMG400021818
GO:0046385	deoxyribose phosphate biosynthetic process	biological_process	0.36421	1	4	2644	34	29181	PGSC0003DMG400020618,PGSC0003DMG400002932,PGSC0003DMG400021818,PGSC0003DMG400003803
GO:0016160	amylase activity	molecular_function	0.36484	1	5	2644	40	29181	PGSC0003DMG400017309,Novel01463,PGSC0003DMG400001855,PGSC0003DMG400011246,PGSC0003DMG400001549
GO:0071941	nitrogen cycle metabolic process	biological_process	0.36562	1	8	2644	67	29181	PGSC0003DMG400027014,PGSC0003DMG400020361,PGSC0003DMG400014442,PGSC0003DMG400007059,PGSC0003DMG400001680,PGSC0003DMG400029061,PGSC0003DMG400024310,PGSC0003DMG400017678
GO:0030865	cortical cytoskeleton organization	biological_process	0.36584	1	2	2644	13	29181	PGSC0003DMG400022120,PGSC0003DMG400001566
GO:0030866	cortical actin cytoskeleton organization	biological_process	0.36584	1	2	2644	13	29181	PGSC0003DMG400022120,PGSC0003DMG400001566
GO:0022890	inorganic cation transmembrane transporter activity	molecular_function	0.36633	1	133	2644	1399	29181	PGSC0003DMG402030815,PGSC0003DMG400010869,PGSC0003DMG400021264,PGSC0003DMG402003705,PGSC0003DMG400023512,PGSC0003DMG400007300,PGSC0003DMG400002134,PGSC0003DMG400023912,PGSC0003DMG400031145,PGSC0003DMG401030861,PGSC0003DMG400032233,PGSC0003DMG400021307,PGSC0003DMG400002944,PGSC0003DMG400009401,PGSC0003DMG400017753,PGSC0003DMG400015711,PGSC0003DMG400011937,PGSC0003DMG400011391,PGSC0003DMG400023039,…
GO:0060962	regulation of ribosomal protein gene transcription from RNA polymerase II promoter	biological_process	0.36644	1	1	2644	5	29181	PGSC0003DMG400011811
GO:0005923	bicellular tight junction	cellular_component	0.36649	1	1	2644	4	29181	PGSC0003DMG400009282
GO:0043296	apical junction complex	cellular_component	0.36649	1	1	2644	4	29181	PGSC0003DMG400009282
GO:0070160	occluding junction	cellular_component	0.36649	1	1	2644	4	29181	PGSC0003DMG400009282
GO:0017003	protein-heme linkage	biological_process	0.36659	1	1	2644	4	29181	PGSC0003DMG400031043
GO:0006768	biotin metabolic process	biological_process	0.36681	1	1	2644	4	29181	PGSC0003DMG400012903
GO:0009102	biotin biosynthetic process	biological_process	0.36681	1	1	2644	4	29181	PGSC0003DMG400012903
GO:0042410	6-carboxyhexanoate-CoA ligase activity	molecular_function	0.36681	1	1	2644	4	29181	PGSC0003DMG400012903
GO:0003916	DNA topoisomerase activity	molecular_function	0.36715	1	14	2644	136	29181	PGSC0003DMG400017678,PGSC0003DMG400006639,PGSC0003DMG400004470,PGSC0003DMG400026073,PGSC0003DMG400014222,PGSC0003DMG400020474,PGSC0003DMG401015894,PGSC0003DMG400022318,PGSC0003DMG400007976,PGSC0003DMG400033063,PGSC0003DMG400016655,PGSC0003DMG400030965,PGSC0003DMG400012340,PGSC0003DMG400026278
GO:0009445	putrescine metabolic process	biological_process	0.3677	1	1	2644	4	29181	PGSC0003DMG400002190
GO:0009446	putrescine biosynthetic process	biological_process	0.3677	1	1	2644	4	29181	PGSC0003DMG400002190
GO:1901137	carbohydrate derivative biosynthetic process	biological_process	0.36773	1	80	2644	818	29181	PGSC0003DMG401031070,PGSC0003DMG400001580,PGSC0003DMG400017723,PGSC0003DMG400003803,PGSC0003DMG400004253,PGSC0003DMG400015214,PGSC0003DMG400017627,PGSC0003DMG400026229,PGSC0003DMG400018763,PGSC0003DMG400002690,PGSC0003DMG400012276,PGSC0003DMG400025336,PGSC0003DMG400027080,PGSC0003DMG402023631,PGSC0003DMG400022026,PGSC0003DMG400002932,PGSC0003DMG400009529,PGSC0003DMG401017657,PGSC0003DMG400004449,…
GO:0005024	transforming growth factor beta-activated receptor activity	molecular_function	0.36793	1	1	2644	4	29181	PGSC0003DMG402023631
GO:0005026	transforming growth factor beta receptor activity, type II	molecular_function	0.36793	1	1	2644	4	29181	PGSC0003DMG402023631
GO:0016625	oxidoreductase activity, acting on the aldehyde or oxo group of donors, iron-sulfur protein as acceptor	molecular_function	0.36814	1	2	2644	13	29181	PGSC0003DMG400022436,PGSC0003DMG400016918
[truncated: 2,329 more rows]

## Sheet: GO enrichment_2
Table S5 GO enrichment of common Down-regulated DEGs
GO_accession	Description	Term_type	Over_represented_pValue	Corrected_pValue	DEG_item	DEG_list	Bg_item	Bg_list	Gene_names
[truncated: 3,745 more rows]

## Sheet: KEGG analysis_1
Table S5 KEGG enrichment of common up-regulated DEGs
#Term	Database	ID	Input number	Background number	P-Value	Corrected P-Value	Input	KEGG_ID/KO	Entrez_ID	Hyperlink
[truncated: 121 more rows]

## Sheet: KEGG analysis_2
Table S5 KEGG enrichment of common Down-regulated DEGs
[truncated: 115 more rows]
