# Supplementary material for: A Genome-Wide View of the Transcriptome Dynamics of Fresh-Cut Potato Tubers
Source: Genes (Basel). 2023 Jan 10;14(1):181. doi: 10.3390/genes14010181 (PMC9859442; doi:10.3390/genes14010181)
Supplement: Supplementary file 1 [file genes-14-00181-s001.zip › Table S6. The GO enrichment of specific DEGs at different time after cut-wounding.xlsx]

## Sheet: 4h specific
Table S6 The GO enrichment of specific DEGs at different time after cut-wounding
GO_accession	Description	Term_type	Over_represented_pValue	Corrected_pValue	DEG_item	DEG_list	Bg_item	Bg_list	Gene_names
GO:0043531	ADP binding	molecular_function	4.4395e-05	0.15252	95	2387	641	29181	PGSC0003DMG400020749,PGSC0003DMG400017061,Novel02402,PGSC0003DMG400010287,Novel02411,PGSC0003DMG400019803,PGSC0003DMG400037159,PGSC0003DMG400009307,PGSC0003DMG402000927,PGSC0003DMG400018693,Novel02258,PGSC0003DMG400028001,PGSC0003DMG401016933,PGSC0003DMG400013090,Novel02246,PGSC0003DMG400006785,PGSC0003DMG400020740,PGSC0003DMG401002242,PGSC0003DMG400019669,PGSC0003DMG401018696,PGSC0003DMG40102926…
GO:0004842	ubiquitin-protein transferase activity	molecular_function	9.3001e-05	0.15252	72	2387	525	29181	PGSC0003DMG400029626,PGSC0003DMG402016574,PGSC0003DMG400022347,PGSC0003DMG400005823,Novel01818,PGSC0003DMG400017312,PGSC0003DMG400030407,PGSC0003DMG400021327,PGSC0003DMG400000070,PGSC0003DMG400019332,PGSC0003DMG400002153,PGSC0003DMG400027759,PGSC0003DMG400021358,PGSC0003DMG401009663,PGSC0003DMG400021684,PGSC0003DMG400011399,PGSC0003DMG400013880,PGSC0003DMG400021325,PGSC0003DMG400031194,Novel01779…
GO:0019787	ubiquitin-like protein transferase activity	molecular_function	9.3001e-05	0.15252	72	2387	525	29181	PGSC0003DMG400001329,PGSC0003DMG400012196,PGSC0003DMG400021359,PGSC0003DMG400018182,PGSC0003DMG400030617,PGSC0003DMG400028687,PGSC0003DMG400018432,PGSC0003DMG400031194,Novel01779,PGSC0003DMG400019406,PGSC0003DMG400000180,PGSC0003DMG400012437,PGSC0003DMG400023634,Novel03007,PGSC0003DMG400007954,PGSC0003DMG400047336,PGSC0003DMG400003072,PGSC0003DMG400001708,PGSC0003DMG400005928,PGSC0003DMG400003661…
GO:0005164	tumor necrosis factor receptor binding	molecular_function	0.00021955	0.18796	5	2387	8	29181	PGSC0003DMG400014316,PGSC0003DMG401014575,PGSC0003DMG400005976,PGSC0003DMG402021124,PGSC0003DMG400015742
GO:0032813	tumor necrosis factor receptor superfamily binding	molecular_function	0.00021955	0.18796	5	2387	8	29181	PGSC0003DMG400005976,PGSC0003DMG402021124,PGSC0003DMG400015742,PGSC0003DMG400014316,PGSC0003DMG401014575
GO:0016567	protein ubiquitination	biological_process	0.00022921	0.18796	34	2387	195	29181	PGSC0003DMG400009182,PGSC0003DMG400026185,PGSC0003DMG400006102,PGSC0003DMG400015378,PGSC0003DMG400021684,PGSC0003DMG400021325,PGSC0003DMG400013880,PGSC0003DMG400030407,Novel00015,PGSC0003DMG400022061,PGSC0003DMG400008259,PGSC0003DMG400029626,PGSC0003DMG400027759,PGSC0003DMG400021358,PGSC0003DMG402013013,PGSC0003DMG400010710,PGSC0003DMG400021326,PGSC0003DMG400021327,PGSC0003DMG400021359,PGSC0003DM…
GO:0016972	thiol oxidase activity	molecular_function	0.0002904	0.1888	10	2387	35	29181	PGSC0003DMG400004061,PGSC0003DMG400003581,PGSC0003DMG400006428,PGSC0003DMG400019124,PGSC0003DMG400024986,PGSC0003DMG401025427,PGSC0003DMG400031310,PGSC0003DMG400010461,PGSC0003DMG400004750,PGSC0003DMG400030311
GO:0098519	nucleotide phosphatase activity, acting on free nucleotides	molecular_function	0.00030698	0.1888	35	2387	194	29181	PGSC0003DMG401000923,PGSC0003DMG400009303,PGSC0003DMG400016797,Novel02589,PGSC0003DMG400021986,PGSC0003DMG400003647,PGSC0003DMG400025028,PGSC0003DMG400010619,PGSC0003DMG401005337,PGSC0003DMG400002217,PGSC0003DMG400006034,PGSC0003DMG401013522,PGSC0003DMG400018903,PGSC0003DMG400024365,PGSC0003DMG400031248,PGSC0003DMG400009699,PGSC0003DMG401007575,Novel01267,PGSC0003DMG400020749,PGSC0003DMG400007496…
GO:0016670	oxidoreductase activity, acting on a sulfur group of donors, oxygen as acceptor	molecular_function	0.00051571	0.26406	11	2387	43	29181	PGSC0003DMG400003747,PGSC0003DMG400006428,PGSC0003DMG400019124,PGSC0003DMG400004061,PGSC0003DMG400003581,PGSC0003DMG400024986,PGSC0003DMG400004750,PGSC0003DMG400010461,PGSC0003DMG400030311,PGSC0003DMG401025427,PGSC0003DMG400031310
GO:0043167	ion binding	molecular_function	0.00053671	0.26406	906	2387	9429	29181	PGSC0003DMG400003380,PGSC0003DMG400030625,PGSC0003DMG400025166,PGSC0003DMG400015168,PGSC0003DMG400027759,PGSC0003DMG402006561,PGSC0003DMG400007030,PGSC0003DMG400010913,PGSC0003DMG400014217,PGSC0003DMG400013329,PGSC0003DMG400005745,PGSC0003DMG401001381,PGSC0003DMG400011160,PGSC0003DMG400003725,PGSC0003DMG400029626,PGSC0003DMG402016574,PGSC0003DMG400002400,PGSC0003DMG400030115,PGSC0003DMG400030578,…
GO:0043934	sporulation	biological_process	0.00078677	0.35182	19	2387	96	29181	PGSC0003DMG402005733,PGSC0003DMG400027323,PGSC0003DMG400031248,PGSC0003DMG402009663,PGSC0003DMG400001544,PGSC0003DMG400021255,PGSC0003DMG400012653,PGSC0003DMG401009663,PGSC0003DMG400004704,PGSC0003DMG400022299,PGSC0003DMG400027002,PGSC0003DMG400010041,PGSC0003DMG401018599,PGSC0003DMG400026989,PGSC0003DMG400000570,PGSC0003DMG400006846,PGSC0003DMG402024549,PGSC0003DMG400010866,PGSC0003DMG400004980
GO:0070647	protein modification by small protein conjugation or removal	biological_process	0.00085811	0.35182	40	2387	263	29181	PGSC0003DMG400016646,PGSC0003DMG400021327,PGSC0003DMG400021326,PGSC0003DMG400010710,PGSC0003DMG402013013,PGSC0003DMG400027759,PGSC0003DMG400021358,PGSC0003DMG400029626,PGSC0003DMG400008259,PGSC0003DMG400022061,PGSC0003DMG400030407,Novel00015,PGSC0003DMG400013880,PGSC0003DMG401012197,PGSC0003DMG400021325,PGSC0003DMG400021684,PGSC0003DMG400015378,PGSC0003DMG400013186,PGSC0003DMG400006102,PGSC0003DM…
GO:0032446	protein modification by small protein conjugation	biological_process	0.0010493	0.3859	34	2387	214	29181	PGSC0003DMG402013013,PGSC0003DMG400010710,PGSC0003DMG400027759,PGSC0003DMG400021358,PGSC0003DMG400021327,PGSC0003DMG400021326,PGSC0003DMG400030407,Novel00015,PGSC0003DMG400008259,PGSC0003DMG400029626,PGSC0003DMG400022061,PGSC0003DMG400013880,PGSC0003DMG400021325,PGSC0003DMG400026185,PGSC0003DMG400006102,PGSC0003DMG400009182,PGSC0003DMG400021684,PGSC0003DMG400015378,PGSC0003DMG400018516,PGSC0003DM…
GO:0009967	positive regulation of signal transduction	biological_process	0.0012549	0.3859	14	2387	66	29181	PGSC0003DMG402002053,PGSC0003DMG400032118,PGSC0003DMG400020089,PGSC0003DMG400008259,PGSC0003DMG400027204,PGSC0003DMG400031007,PGSC0003DMG400025174,PGSC0003DMG400000399,PGSC0003DMG401027561,PGSC0003DMG400030663,Novel00308,PGSC0003DMG400016820,PGSC0003DMG400023467,Novel03299
GO:0010647	positive regulation of cell communication	biological_process	0.0012549	0.3859	14	2387	66	29181	PGSC0003DMG400000399,PGSC0003DMG400025174,PGSC0003DMG400031007,PGSC0003DMG401027561,PGSC0003DMG400023467,PGSC0003DMG400016820,Novel03299,PGSC0003DMG400030663,Novel00308,PGSC0003DMG402002053,PGSC0003DMG400020089,PGSC0003DMG400032118,PGSC0003DMG400008259,PGSC0003DMG400027204
GO:0023056	positive regulation of signaling	biological_process	0.0012549	0.3859	14	2387	66	29181	Novel00308,PGSC0003DMG400030663,Novel03299,PGSC0003DMG400023467,PGSC0003DMG400016820,PGSC0003DMG401027561,PGSC0003DMG400000399,PGSC0003DMG400025174,PGSC0003DMG400031007,PGSC0003DMG400027204,PGSC0003DMG400008259,PGSC0003DMG400032118,PGSC0003DMG400020089,PGSC0003DMG402002053
GO:0000152	nuclear ubiquitin ligase complex	cellular_component	0.0017368	0.44973	48	2387	372	29181	PGSC0003DMG400031194,PGSC0003DMG400009420,PGSC0003DMG400012437,PGSC0003DMG400017762,PGSC0003DMG400000180,PGSC0003DMG400019406,Novel01779,PGSC0003DMG400047336,PGSC0003DMG400007954,Novel03007,PGSC0003DMG400023634,PGSC0003DMG400008931,PGSC0003DMG400012193,PGSC0003DMG400028579,PGSC0003DMG400001708,PGSC0003DMG400003661,PGSC0003DMG400007837,PGSC0003DMG400002007,PGSC0003DMG400014316,PGSC0003DMG400012196…
GO:0005680	anaphase-promoting complex	cellular_component	0.0017368	0.44973	48	2387	372	29181	PGSC0003DMG400002007,PGSC0003DMG400007837,PGSC0003DMG400003661,Novel03007,PGSC0003DMG400007954,PGSC0003DMG400023634,PGSC0003DMG400047336,PGSC0003DMG400001708,PGSC0003DMG400012193,PGSC0003DMG400028579,PGSC0003DMG400008931,PGSC0003DMG400031194,PGSC0003DMG400000180,PGSC0003DMG400017762,PGSC0003DMG400019406,Novel01779,PGSC0003DMG400012437,PGSC0003DMG400009420,PGSC0003DMG400023881,PGSC0003DMG400005742…
GO:0031461	cullin-RING ubiquitin ligase complex	cellular_component	0.0017368	0.44973	48	2387	372	29181	PGSC0003DMG400047336,PGSC0003DMG400007954,Novel03007,PGSC0003DMG400023634,PGSC0003DMG400008931,PGSC0003DMG400012193,PGSC0003DMG400028579,PGSC0003DMG400001708,PGSC0003DMG400031194,PGSC0003DMG400009420,PGSC0003DMG400012437,Novel01779,PGSC0003DMG400017762,PGSC0003DMG400000180,PGSC0003DMG400019406,PGSC0003DMG400002007,PGSC0003DMG400003661,PGSC0003DMG400007837,PGSC0003DMG400012196,PGSC0003DMG400001329…
GO:0005402	cation:sugar symporter activity	molecular_function	0.0028264	0.65191	8	2387	31	29181	PGSC0003DMG400023402,PGSC0003DMG400017751,PGSC0003DMG400000209,PGSC0003DMG400017572,Novel03303,PGSC0003DMG400002132,PGSC0003DMG400018781,PGSC0003DMG400012523
GO:0042254	ribosome biogenesis	biological_process	0.0029461	0.65191	44	2387	329	29181	PGSC0003DMG400020740,PGSC0003DMG402029631,PGSC0003DMG400019135,PGSC0003DMG400000112,PGSC0003DMG401019352,PGSC0003DMG400004687,PGSC0003DMG400014430,PGSC0003DMG400001766,PGSC0003DMG402008019,PGSC0003DMG400018405,PGSC0003DMG400043560,PGSC0003DMG400003614,PGSC0003DMG400007496,PGSC0003DMG402002977,PGSC0003DMG400017401,PGSC0003DMG400033569,PGSC0003DMG400019861,PGSC0003DMG400014208,PGSC0003DMG400038720,…
GO:0005801	cis-Golgi network	cellular_component	0.0029833	0.65191	10	2387	45	29181	PGSC0003DMG400001378,PGSC0003DMG400025968,PGSC0003DMG400030843,PGSC0003DMG400030849,PGSC0003DMG400024394,PGSC0003DMG400022061,PGSC0003DMG400016203,PGSC0003DMG400019455,PGSC0003DMG401002606,PGSC0003DMG400029549
GO:0022613	ribonucleoprotein complex biogenesis	biological_process	0.0030476	0.65191	46	2387	347	29181	PGSC0003DMG400022345,PGSC0003DMG400010007,PGSC0003DMG400000711,PGSC0003DMG400030365,PGSC0003DMG400009279,PGSC0003DMG400025975,PGSC0003DMG400003073,PGSC0003DMG400038720,PGSC0003DMG400014208,PGSC0003DMG400019861,PGSC0003DMG400033569,PGSC0003DMG400017401,PGSC0003DMG400007496,PGSC0003DMG402002977,PGSC0003DMG400003614,PGSC0003DMG400043560,PGSC0003DMG400018405,PGSC0003DMG402008019,PGSC0003DMG400001766,…
GO:0016791	phosphatase activity	molecular_function	0.0035974	0.68032	61	2387	466	29181	PGSC0003DMG401007575,PGSC0003DMG400009873,PGSC0003DMG400024365,PGSC0003DMG400031248,PGSC0003DMG400009699,PGSC0003DMG400015253,PGSC0003DMG400018903,PGSC0003DMG400006034,PGSC0003DMG401013522,PGSC0003DMG400010619,PGSC0003DMG400025028,PGSC0003DMG400006217,PGSC0003DMG400030092,PGSC0003DMG401005337,PGSC0003DMG400002217,PGSC0003DMG400006555,PGSC0003DMG400003647,PGSC0003DMG400021986,PGSC0003DMG400027427,…
GO:0015018	galactosylgalactosylxylosylprotein 3-beta-glucuronosyltransferase activity	molecular_function	0.0036188	0.68032	4	2387	8	29181	PGSC0003DMG400006379,PGSC0003DMG402017555,Novel03212,PGSC0003DMG400018584
GO:0015020	glucuronosyltransferase activity	molecular_function	0.0036188	0.68032	4	2387	8	29181	PGSC0003DMG400018584,Novel03212,PGSC0003DMG400006379,PGSC0003DMG402017555
GO:0051119	sugar transmembrane transporter activity	molecular_function	0.0037334	0.68032	8	2387	32	29181	PGSC0003DMG400002132,PGSC0003DMG400018781,PGSC0003DMG400012523,PGSC0003DMG400000209,PGSC0003DMG400017572,Novel03303,PGSC0003DMG400023402,PGSC0003DMG400017751
GO:0019001	guanyl nucleotide binding	molecular_function	0.0040246	0.70718	99	2387	817	29181	PGSC0003DMG400016797,PGSC0003DMG400009303,PGSC0003DMG400003319,PGSC0003DMG400030507,Novel02589,PGSC0003DMG400002275,PGSC0003DMG400016613,PGSC0003DMG400026211,PGSC0003DMG400002980,PGSC0003DMG400010619,PGSC0003DMG400003465,PGSC0003DMG401013522,PGSC0003DMG400021863,PGSC0003DMG400002231,PGSC0003DMG400027791,PGSC0003DMG400026226,PGSC0003DMG400003564,PGSC0003DMG400009699,PGSC0003DMG400025545,PGSC0003DM…
GO:0000151	ubiquitin ligase complex	cellular_component	0.0045531	0.70792	48	2387	390	29181	PGSC0003DMG400015075,PGSC0003DMG400001707,PGSC0003DMG400020061,PGSC0003DMG400003404,PGSC0003DMG400011399,PGSC0003DMG400028194,PGSC0003DMG400000460,PGSC0003DMG400021684,PGSC0003DMG400021778,PGSC0003DMG400030714,PGSC0003DMG400002153,PGSC0003DMG400029328,PGSC0003DMG400023339,PGSC0003DMG400000070,PGSC0003DMG400011007,PGSC0003DMG400017312,Novel01818,Novel02312,PGSC0003DMG400005823,PGSC0003DMG400022347…
GO:0001071	nucleic acid binding transcription factor activity	molecular_function	0.0046549	0.70792	155	2387	1513	29181	PGSC0003DMG400022027,PGSC0003DMG400017334,PGSC0003DMG400034289,PGSC0003DMG400019693,PGSC0003DMG402032501,PGSC0003DMG400023341,PGSC0003DMG401020784,PGSC0003DMG400022209,PGSC0003DMG400000064,PGSC0003DMG400019824,PGSC0003DMG400012305,PGSC0003DMG400001434,PGSC0003DMG400023525,PGSC0003DMG402024252,PGSC0003DMG400007408,PGSC0003DMG400016769,PGSC0003DMG400025751,PGSC0003DMG400027594,PGSC0003DMG400027167,…
GO:0003700	transcription factor activity, sequence-specific DNA binding	molecular_function	0.0046549	0.70792	155	2387	1513	29181	PGSC0003DMG400015549,PGSC0003DMG400025582,PGSC0003DMG400026261,PGSC0003DMG400030843,PGSC0003DMG400025465,PGSC0003DMG400002235,PGSC0003DMG400030507,Novel03367,PGSC0003DMG400017485,PGSC0003DMG400027770,PGSC0003DMG400017116,PGSC0003DMG401006771,PGSC0003DMG400027208,PGSC0003DMG400001544,PGSC0003DMG400004723,PGSC0003DMG400026821,PGSC0003DMG400003536,PGSC0003DMG400030071,PGSC0003DMG400001960,PGSC0003DM…
GO:0015293	symporter activity	molecular_function	0.0048117	0.70792	10	2387	48	29181	PGSC0003DMG400017751,PGSC0003DMG400023402,PGSC0003DMG400018781,PGSC0003DMG400004061,PGSC0003DMG400012523,PGSC0003DMG400002132,PGSC0003DMG400030519,Novel03303,PGSC0003DMG400000209,PGSC0003DMG400017572
GO:0015294	solute:cation symporter activity	molecular_function	0.0048117	0.70792	10	2387	48	29181	PGSC0003DMG400002132,PGSC0003DMG400018781,PGSC0003DMG400012523,PGSC0003DMG400004061,PGSC0003DMG400000209,PGSC0003DMG400017572,Novel03303,PGSC0003DMG400030519,PGSC0003DMG400023402,PGSC0003DMG400017751
GO:0005351	sugar:proton symporter activity	molecular_function	0.0055705	0.7613	7	2387	28	29181	PGSC0003DMG400017751,PGSC0003DMG400017572,PGSC0003DMG400000209,PGSC0003DMG400023402,Novel03303,PGSC0003DMG400018781,PGSC0003DMG400002132
GO:0015295	solute:proton symporter activity	molecular_function	0.0055705	0.7613	7	2387	28	29181	PGSC0003DMG400018781,PGSC0003DMG400002132,PGSC0003DMG400017751,Novel03303,PGSC0003DMG400000209,PGSC0003DMG400017572,PGSC0003DMG400023402
GO:0035556	intracellular signal transduction	biological_process	0.0059943	0.76926	85	2387	761	29181	PGSC0003DMG401008903,PGSC0003DMG400009098,PGSC0003DMG400012554,PGSC0003DMG400003319,PGSC0003DMG400030714,PGSC0003DMG400007242,Novel01323,PGSC0003DMG400016820,Novel00308,PGSC0003DMG400036536,PGSC0003DMG400002980,PGSC0003DMG400028972,PGSC0003DMG400026226,PGSC0003DMG400009699,PGSC0003DMG400025262,Novel02038,PGSC0003DMG400014302,PGSC0003DMG400008840,Novel02744,PGSC0003DMG400028520,PGSC0003DMG40001982…
GO:0005525	GTP binding	molecular_function	0.0060759	0.76926	96	2387	799	29181	PGSC0003DMG400001714,PGSC0003DMG400020172,PGSC0003DMG400018461,PGSC0003DMG401003154,PGSC0003DMG400008393,PGSC0003DMG400010127,PGSC0003DMG400010677,PGSC0003DMG400018590,PGSC0003DMG402002262,Novel01267,PGSC0003DMG400021343,Novel01118,PGSC0003DMG400022345,PGSC0003DMG400008801,PGSC0003DMG402029631,PGSC0003DMG401008349,PGSC0003DMG400024571,PGSC0003DMG403026842,PGSC0003DMG400025259,Novel02118,PGSC0003D…
GO:0032561	guanyl ribonucleotide binding	molecular_function	0.0060978	0.76926	97	2387	810	29181	PGSC0003DMG400022893,PGSC0003DMG401000923,PGSC0003DMG400005839,Novel00814,PGSC0003DMG400015330,PGSC0003DMG400027204,PGSC0003DMG402029267,Novel00273,PGSC0003DMG400004704,PGSC0003DMG402028565,PGSC0003DMG400003380,PGSC0003DMG400002992,PGSC0003DMG400007353,PGSC0003DMG400010944,PGSC0003DMG400004579,PGSC0003DMG400007013,PGSC0003DMG400035738,PGSC0003DMG400003647,PGSC0003DMG400024365,PGSC0003DMG400031248…
GO:0034470	ncRNA processing	biological_process	0.0064324	0.77621	93	2387	827	29181	PGSC0003DMG401003285,PGSC0003DMG400001123,PGSC0003DMG400009699,Novel01333,PGSC0003DMG400014431,PGSC0003DMG400021659,PGSC0003DMG400015226,PGSC0003DMG400002980,PGSC0003DMG400009571,PGSC0003DMG400020086,PGSC0003DMG400006854,PGSC0003DMG400033668,PGSC0003DMG400030838,Novel03182,PGSC0003DMG400027328,PGSC0003DMG400023836,PGSC0003DMG400014873,PGSC0003DMG400009303,PGSC0003DMG400019734,PGSC0003DMG402003505…
GO:0030436	asexual sporulation	biological_process	0.0070816	0.77621	11	2387	54	29181	PGSC0003DMG402009663,PGSC0003DMG400022299,PGSC0003DMG400027002,PGSC0003DMG400004704,PGSC0003DMG402005733,PGSC0003DMG400004980,PGSC0003DMG400012653,PGSC0003DMG401009663,PGSC0003DMG400026989,PGSC0003DMG400000570,PGSC0003DMG400010866
GO:0006364	rRNA processing	biological_process	0.0072158	0.77621	32	2387	236	29181	PGSC0003DMG400030758,Novel03182,PGSC0003DMG400027328,PGSC0003DMG400010119,PGSC0003DMG400013424,PGSC0003DMG400018199,PGSC0003DMG400014431,PGSC0003DMG400014268,PGSC0003DMG400001123,PGSC0003DMG401003285,PGSC0003DMG400000343,PGSC0003DMG401031045,PGSC0003DMG400018243,PGSC0003DMG400015226,PGSC0003DMG400009571,PGSC0003DMG402008019,PGSC0003DMG400018405,PGSC0003DMG400043560,PGSC0003DMG400003614,PGSC0003DM…
GO:0016072	rRNA metabolic process	biological_process	0.0072158	0.77621	32	2387	236	29181	PGSC0003DMG400013424,PGSC0003DMG400030758,Novel03182,PGSC0003DMG400027328,PGSC0003DMG400010119,PGSC0003DMG400018199,PGSC0003DMG401003285,PGSC0003DMG400001123,PGSC0003DMG400000343,PGSC0003DMG400014268,PGSC0003DMG400014431,PGSC0003DMG400009571,PGSC0003DMG401031045,PGSC0003DMG400015226,PGSC0003DMG400018243,PGSC0003DMG402002977,PGSC0003DMG400018405,PGSC0003DMG400043560,PGSC0003DMG400003614,PGSC0003DM…
GO:0008135	translation factor activity, RNA binding	molecular_function	0.0073856	0.77621	34	2387	258	29181	Novel01234,PGSC0003DMG402028565,Novel00814,PGSC0003DMG400022893,PGSC0003DMG400007016,PGSC0003DMG400030519,PGSC0003DMG400022713,PGSC0003DMG400010478,PGSC0003DMG400031271,PGSC0003DMG400029694,PGSC0003DMG400026534,PGSC0003DMG400001378,PGSC0003DMG400010664,PGSC0003DMG400025373,PGSC0003DMG400003564,PGSC0003DMG402002977,PGSC0003DMG400041027,PGSC0003DMG400022942,PGSC0003DMG400018811,PGSC0003DMG400007717…
GO:0002143	tRNA wobble position uridine thiolation	biological_process	0.0080948	0.77621	3	2387	5	29181	PGSC0003DMG400012408,PGSC0003DMG400001543,PGSC0003DMG400011479
GO:0006305	DNA alkylation	biological_process	0.0084331	0.77621	8	2387	38	29181	PGSC0003DMG402029795,PGSC0003DMG402002262,PGSC0003DMG400013424,Novel01584,PGSC0003DMG400032269,PGSC0003DMG400027051,PGSC0003DMG400017691,PGSC0003DMG400009321
GO:0006306	DNA methylation	biological_process	0.0084331	0.77621	8	2387	38	29181	PGSC0003DMG400032269,PGSC0003DMG400027051,PGSC0003DMG400017691,PGSC0003DMG400009321,PGSC0003DMG402029795,PGSC0003DMG400013424,PGSC0003DMG402002262,Novel01584
GO:0044728	DNA methylation or demethylation	biological_process	0.0084331	0.77621	8	2387	38	29181	PGSC0003DMG400027051,PGSC0003DMG400032269,PGSC0003DMG400017691,PGSC0003DMG400009321,PGSC0003DMG402029795,Novel01584,PGSC0003DMG400013424,PGSC0003DMG402002262
GO:0006096	glycolytic process	biological_process	0.0085193	0.77621	14	2387	78	29181	PGSC0003DMG400010007,PGSC0003DMG400027321,PGSC0003DMG400019734,PGSC0003DMG402027860,PGSC0003DMG400010691,PGSC0003DMG400015766,PGSC0003DMG400010913,Novel01389,PGSC0003DMG400027925,PGSC0003DMG400024701,PGSC0003DMG400003882,PGSC0003DMG400015392,PGSC0003DMG400024220,PGSC0003DMG400014944
GO:0006757	ATP generation from ADP	biological_process	0.0085193	0.77621	14	2387	78	29181	PGSC0003DMG400010913,PGSC0003DMG400024701,PGSC0003DMG400027925,Novel01389,PGSC0003DMG400015392,PGSC0003DMG400003882,PGSC0003DMG400024220,PGSC0003DMG400014944,PGSC0003DMG400010007,PGSC0003DMG400019734,PGSC0003DMG400027321,PGSC0003DMG400010691,PGSC0003DMG402027860,PGSC0003DMG400015766
GO:0009135	purine nucleoside diphosphate metabolic process	biological_process	0.0085193	0.77621	14	2387	78	29181	PGSC0003DMG400024701,PGSC0003DMG400027925,Novel01389,PGSC0003DMG400010913,PGSC0003DMG400024220,PGSC0003DMG400014944,PGSC0003DMG400003882,PGSC0003DMG400015392,PGSC0003DMG400019734,PGSC0003DMG400027321,PGSC0003DMG400010007,PGSC0003DMG400015766,PGSC0003DMG400010691,PGSC0003DMG402027860
GO:0009179	purine ribonucleoside diphosphate metabolic process	biological_process	0.0085193	0.77621	14	2387	78	29181	PGSC0003DMG400010913,PGSC0003DMG400024701,PGSC0003DMG400027925,Novel01389,PGSC0003DMG400015392,PGSC0003DMG400003882,PGSC0003DMG400024220,PGSC0003DMG400014944,PGSC0003DMG400010007,PGSC0003DMG400027321,PGSC0003DMG400019734,PGSC0003DMG402027860,PGSC0003DMG400010691,PGSC0003DMG400015766
GO:0009185	ribonucleoside diphosphate metabolic process	biological_process	0.0085193	0.77621	14	2387	78	29181	PGSC0003DMG400015766,PGSC0003DMG400010691,PGSC0003DMG402027860,PGSC0003DMG400019734,PGSC0003DMG400027321,PGSC0003DMG400010007,PGSC0003DMG400014944,PGSC0003DMG400024220,PGSC0003DMG400015392,PGSC0003DMG400003882,PGSC0003DMG400024701,PGSC0003DMG400027925,Novel01389,PGSC0003DMG400010913
GO:0046031	ADP metabolic process	biological_process	0.0085193	0.77621	14	2387	78	29181	PGSC0003DMG400010913,Novel01389,PGSC0003DMG400027925,PGSC0003DMG400024701,PGSC0003DMG400015392,PGSC0003DMG400003882,PGSC0003DMG400014944,PGSC0003DMG400024220,PGSC0003DMG400010007,PGSC0003DMG400027321,PGSC0003DMG400019734,PGSC0003DMG402027860,PGSC0003DMG400010691,PGSC0003DMG400015766
GO:0072524	pyridine-containing compound metabolic process	biological_process	0.0089264	0.78708	20	2387	127	29181	PGSC0003DMG400027925,Novel01389,PGSC0003DMG400019717,PGSC0003DMG400014944,PGSC0003DMG400003882,PGSC0003DMG400018194,PGSC0003DMG400027321,PGSC0003DMG400000112,PGSC0003DMG400010691,PGSC0003DMG400024701,PGSC0003DMG400006483,PGSC0003DMG400010913,PGSC0003DMG400024220,PGSC0003DMG400015392,PGSC0003DMG400018369,PGSC0003DMG400021199,PGSC0003DMG400019734,PGSC0003DMG400010007,PGSC0003DMG400015766,PGSC0003DM…
GO:0016715	oxidoreductase activity, acting on paired donors, with incorporation or reduction of molecular oxygen, reduced ascorbate as one donor, and incorporation of one atom of oxygen	molecular_function	0.0089586	0.78708	4	2387	9	29181	PGSC0003DMG400019523,PGSC0003DMG400012437,PGSC0003DMG401026514,PGSC0003DMG400019466
GO:0051082	unfolded protein binding	molecular_function	0.0091867	0.79296	31	2387	244	29181	PGSC0003DMG400028158,PGSC0003DMG400022061,PGSC0003DMG400005361,PGSC0003DMG400014405,PGSC0003DMG400016203,PGSC0003DMG400025245,PGSC0003DMG400022352,PGSC0003DMG400027438,PGSC0003DMG400012711,PGSC0003DMG400012523,PGSC0003DMG400017440,PGSC0003DMG400008149,PGSC0003DMG400019647,PGSC0003DMG400030843,PGSC0003DMG400024481,PGSC0003DMG401032143,PGSC0003DMG400024609,PGSC0003DMG400022419,PGSC0003DMG400010710,…
GO:0043169	cation binding	molecular_function	0.00936	0.79398	477	2387	5111	29181	PGSC0003DMG400005675,PGSC0003DMG400001398,PGSC0003DMG400030069,PGSC0003DMG400017762,PGSC0003DMG400022093,PGSC0003DMG400025515,PGSC0003DMG402029813,PGSC0003DMG400003103,PGSC0003DMG400024490,PGSC0003DMG400033932,PGSC0003DMG400008438,PGSC0003DMG400012041,PGSC0003DMG400019647,PGSC0003DMG400002383,Novel02891,PGSC0003DMG400001246,PGSC0003DMG400011022,PGSC0003DMG400014709,PGSC0003DMG400005673,PGSC0003DM…
GO:0050896	response to stimulus	biological_process	0.0097316	0.81151	465	2387	5028	29181	PGSC0003DMG400032509,PGSC0003DMG402006561,PGSC0003DMG400010913,PGSC0003DMG400021719,PGSC0003DMG400014589,PGSC0003DMG400030243,PGSC0003DMG402023851,PGSC0003DMG400003380,PGSC0003DMG400017053,PGSC0003DMG400030115,PGSC0003DMG400025162,PGSC0003DMG400005745,PGSC0003DMG400021214,PGSC0003DMG400025433,PGSC0003DMG400022157,PGSC0003DMG400042669,PGSC0003DMG400017186,PGSC0003DMG402010657,PGSC0003DMG400016647,…
GO:0048584	positive regulation of response to stimulus	biological_process	0.0099706	0.81154	16	2387	100	29181	PGSC0003DMG402002053,PGSC0003DMG400023467,PGSC0003DMG400020170,PGSC0003DMG400015253,PGSC0003DMG400025174,PGSC0003DMG400000399,PGSC0003DMG400027204,PGSC0003DMG400008259,PGSC0003DMG400020089,PGSC0003DMG400032118,Novel00308,PGSC0003DMG400030663,Novel03299,PGSC0003DMG400016820,PGSC0003DMG401027561,PGSC0003DMG400031007
GO:0046872	metal ion binding	molecular_function	0.010062	0.81154	473	2387	5075	29181	PGSC0003DMG400001398,PGSC0003DMG400005675,PGSC0003DMG400030069,PGSC0003DMG400022093,PGSC0003DMG400017762,PGSC0003DMG402029813,PGSC0003DMG400003103,PGSC0003DMG400025515,PGSC0003DMG400008438,PGSC0003DMG400012041,PGSC0003DMG400002383,PGSC0003DMG400019647,PGSC0003DMG400033932,PGSC0003DMG400024490,PGSC0003DMG400011022,Novel02891,PGSC0003DMG400001246,PGSC0003DMG400028347,PGSC0003DMG400013090,PGSC0003DM…
GO:0016860	intramolecular oxidoreductase activity	molecular_function	0.010701	0.8422	15	2387	89	29181	PGSC0003DMG400003564,PGSC0003DMG400015766,Novel02763,PGSC0003DMG400007379,PGSC0003DMG400024889,PGSC0003DMG400021199,PGSC0003DMG400004436,PGSC0003DMG400014944,PGSC0003DMG400003411,PGSC0003DMG400011772,PGSC0003DMG400018369,PGSC0003DMG400015392,PGSC0003DMG400028826,PGSC0003DMG400027925,PGSC0003DMG400024701
GO:0034660	ncRNA metabolic process	biological_process	0.010784	0.8422	110	2387	1016	29181	PGSC0003DMG400022027,PGSC0003DMG400006822,PGSC0003DMG400019135,PGSC0003DMG400007678,PGSC0003DMG400014694,PGSC0003DMG402031196,PGSC0003DMG400014430,PGSC0003DMG401029267,PGSC0003DMG400003882,Novel02246,PGSC0003DMG400014709,PGSC0003DMG400022209,PGSC0003DMG400013638,PGSC0003DMG400027514,PGSC0003DMG400019861,PGSC0003DMG400001398,PGSC0003DMG400010007,PGSC0003DMG400004020,PGSC0003DMG400009279,PGSC0003DM…
GO:0005991	trehalose metabolic process	biological_process	0.011585	0.89063	11	2387	55	29181	PGSC0003DMG400013857,PGSC0003DMG400009279,PGSC0003DMG400027449,PGSC0003DMG400022352,PGSC0003DMG400010556,PGSC0003DMG400013809,PGSC0003DMG401017546,PGSC0003DMG400021341,PGSC0003DMG400030849,Novel02532,PGSC0003DMG400020619
GO:0006090	pyruvate metabolic process	biological_process	0.012606	0.90636	14	2387	83	29181	PGSC0003DMG400027321,PGSC0003DMG400019734,PGSC0003DMG400010007,PGSC0003DMG400015766,PGSC0003DMG402027860,PGSC0003DMG400010691,PGSC0003DMG400027925,PGSC0003DMG400024701,Novel01389,PGSC0003DMG400010913,PGSC0003DMG400014944,PGSC0003DMG400024220,PGSC0003DMG400015392,PGSC0003DMG400003882
GO:0009451	RNA modification	biological_process	0.01302	0.90636	48	2387	375	29181	PGSC0003DMG400007496,PGSC0003DMG400001543,PGSC0003DMG400033569,PGSC0003DMG400011479,PGSC0003DMG401003154,PGSC0003DMG400003614,PGSC0003DMG400023319,Novel01267,PGSC0003DMG400022209,PGSC0003DMG402029631,PGSC0003DMG400018107,PGSC0003DMG400012408,PGSC0003DMG400008801,PGSC0003DMG400003882,PGSC0003DMG401029267,PGSC0003DMG400015506,PGSC0003DMG402016772,PGSC0003DMG402031196,PGSC0003DMG400008871,PGSC0003DM…
GO:0016073	snRNA metabolic process	biological_process	0.01308	0.90636	2	2387	3	29181	Novel01048,PGSC0003DMG400008328
GO:0016180	snRNA processing	biological_process	0.01308	0.90636	2	2387	3	29181	Novel01048,PGSC0003DMG400008328
GO:0034472	snRNA 3'-end processing	biological_process	0.01308	0.90636	2	2387	3	29181	PGSC0003DMG400008328,Novel01048
GO:0034477	U6 snRNA 3'-end processing	biological_process	0.01308	0.90636	2	2387	3	29181	PGSC0003DMG400008328,Novel01048
GO:0043628	ncRNA 3'-end processing	biological_process	0.01308	0.90636	2	2387	3	29181	PGSC0003DMG400008328,Novel01048
GO:0042578	phosphoric ester hydrolase activity	molecular_function	0.013639	0.93199	68	2387	572	29181	PGSC0003DMG400027427,Novel02589,PGSC0003DMG400021986,PGSC0003DMG400021341,PGSC0003DMG400003757,PGSC0003DMG400016797,PGSC0003DMG400009303,PGSC0003DMG400031130,Novel01424,PGSC0003DMG400010493,PGSC0003DMG400015253,PGSC0003DMG400009699,PGSC0003DMG401013522,PGSC0003DMG401005337,PGSC0003DMG400025028,PGSC0003DMG400010619,PGSC0003DMG400006735,PGSC0003DMG400007496,PGSC0003DMG400020749,PGSC0003DMG400018838…
GO:0005992	trehalose biosynthetic process	biological_process	0.014428	0.93945	9	2387	42	29181	PGSC0003DMG400020619,PGSC0003DMG400030849,PGSC0003DMG400010556,PGSC0003DMG400013809,PGSC0003DMG401017546,PGSC0003DMG400021341,PGSC0003DMG400027449,PGSC0003DMG400013857,PGSC0003DMG400009279
GO:0019362	pyridine nucleotide metabolic process	biological_process	0.01451	0.93945	17	2387	106	29181	PGSC0003DMG400014944,PGSC0003DMG400003882,PGSC0003DMG400018194,PGSC0003DMG400027925,Novel01389,PGSC0003DMG400010691,PGSC0003DMG400027321,PGSC0003DMG400024220,PGSC0003DMG400015392,PGSC0003DMG400018369,PGSC0003DMG400024701,PGSC0003DMG400010913,PGSC0003DMG400015766,PGSC0003DMG402027860,PGSC0003DMG400021199,PGSC0003DMG400019734,PGSC0003DMG400010007
GO:0046496	nicotinamide nucleotide metabolic process	biological_process	0.01451	0.93945	17	2387	106	29181	PGSC0003DMG400027925,Novel01389,PGSC0003DMG400014944,PGSC0003DMG400003882,PGSC0003DMG400018194,PGSC0003DMG400027321,PGSC0003DMG400010691,PGSC0003DMG400024701,PGSC0003DMG400010913,PGSC0003DMG400024220,PGSC0003DMG400015392,PGSC0003DMG400018369,PGSC0003DMG400021199,PGSC0003DMG400019734,PGSC0003DMG400010007,PGSC0003DMG400015766,PGSC0003DMG402027860
GO:0009132	nucleoside diphosphate metabolic process	biological_process	0.014512	0.93945	16	2387	100	29181	PGSC0003DMG400027321,PGSC0003DMG400023557,PGSC0003DMG400010691,PGSC0003DMG400027925,Novel01389,PGSC0003DMG400014944,PGSC0003DMG400023569,PGSC0003DMG400003882,PGSC0003DMG400019734,PGSC0003DMG400010007,PGSC0003DMG400015766,PGSC0003DMG402027860,PGSC0003DMG400024701,PGSC0003DMG400010913,PGSC0003DMG400024220,PGSC0003DMG400015392
GO:0043565	sequence-specific DNA binding	molecular_function	0.015817	1	81	2387	758	29181	PGSC0003DMG400019824,PGSC0003DMG400000064,PGSC0003DMG400028520,PGSC0003DMG400023478,PGSC0003DMG400001434,PGSC0003DMG400026252,PGSC0003DMG401013540,PGSC0003DMG400012711,PGSC0003DMG400027036,PGSC0003DMG400016769,PGSC0003DMG400017334,PGSC0003DMG400022027,PGSC0003DMG400018781,PGSC0003DMG400027599,PGSC0003DMG402002771,PGSC0003DMG400018222,PGSC0003DMG402032501,PGSC0003DMG400007099,PGSC0003DMG400023341,…
GO:0004719	protein-L-isoaspartate (D-aspartate) O-methyltransferase activity	molecular_function	0.016702	1	9	2387	42	29181	PGSC0003DMG400015226,PGSC0003DMG400023836,PGSC0003DMG401026272,PGSC0003DMG401003285,PGSC0003DMG400000343,PGSC0003DMG400002773,PGSC0003DMG400010119,Novel03182,PGSC0003DMG400003614
GO:0006733	oxidoreduction coenzyme metabolic process	biological_process	0.016708	1	19	2387	124	29181	PGSC0003DMG400027321,PGSC0003DMG400010691,PGSC0003DMG400028666,PGSC0003DMG400027925,Novel01389,PGSC0003DMG400018194,PGSC0003DMG400003882,PGSC0003DMG400014944,PGSC0003DMG400010007,PGSC0003DMG400019734,PGSC0003DMG400021199,PGSC0003DMG402027860,PGSC0003DMG400015766,PGSC0003DMG400010913,Novel03614,PGSC0003DMG400024701,PGSC0003DMG400018369,PGSC0003DMG400015392,PGSC0003DMG400024220
GO:0019068	virion assembly	biological_process	0.01738	1	19	2387	135	29181	PGSC0003DMG400005197,PGSC0003DMG400010897,PGSC0003DMG403003025,PGSC0003DMG400025126,PGSC0003DMG400023636,PGSC0003DMG400001378,PGSC0003DMG400004167,PGSC0003DMG400030849,PGSC0003DMG400011728,PGSC0003DMG400016203,Novel03367,PGSC0003DMG400006835,PGSC0003DMG400031833,PGSC0003DMG400000566,PGSC0003DMG400024772,PGSC0003DMG400008438,PGSC0003DMG400009939,PGSC0003DMG400029165,PGSC0003DMG400018283
GO:0004411	homogentisate 1,2-dioxygenase activity	molecular_function	0.018419	1	2	2387	3	29181	PGSC0003DMG400015330,PGSC0003DMG402000914
GO:0006559	L-phenylalanine catabolic process	biological_process	0.018419	1	2	2387	3	29181	PGSC0003DMG400015330,PGSC0003DMG402000914
GO:1902222	erythrose 4-phosphate/phosphoenolpyruvate family amino acid catabolic process	biological_process	0.018419	1	2	2387	3	29181	PGSC0003DMG400015330,PGSC0003DMG402000914
GO:0016861	intramolecular oxidoreductase activity, interconverting aldoses and ketoses	molecular_function	0.018546	1	12	2387	70	29181	PGSC0003DMG400018369,PGSC0003DMG400011772,PGSC0003DMG400015392,PGSC0003DMG400014944,PGSC0003DMG400004436,PGSC0003DMG400027925,PGSC0003DMG400024701,PGSC0003DMG400028826,Novel02763,PGSC0003DMG400015766,PGSC0003DMG400024889,PGSC0003DMG400021199
GO:0071705	nitrogen compound transport	biological_process	0.018706	1	49	2387	417	29181	PGSC0003DMG400017743,PGSC0003DMG400003540,PGSC0003DMG400023710,Novel03229,PGSC0003DMG400019455,PGSC0003DMG400005799,PGSC0003DMG400004162,PGSC0003DMG400009821,PGSC0003DMG400007012,PGSC0003DMG400025029,PGSC0003DMG400011089,PGSC0003DMG400027534,PGSC0003DMG400010866,PGSC0003DMG400013457,PGSC0003DMG400000001,PGSC0003DMG400023478,PGSC0003DMG400017762,PGSC0003DMG400027514,PGSC0003DMG400003103,PGSC0003DM…
GO:0000123	histone acetyltransferase complex	cellular_component	0.01872	1	9	2387	47	29181	PGSC0003DMG400009433,PGSC0003DMG400000180,Novel01118,PGSC0003DMG400000566,PGSC0003DMG400012196,PGSC0003DMG400031248,PGSC0003DMG400030246,PGSC0003DMG400031798,PGSC0003DMG400032104
GO:0031248	protein acetyltransferase complex	cellular_component	0.01872	1	9	2387	47	29181	PGSC0003DMG400031248,PGSC0003DMG400030246,PGSC0003DMG400031798,PGSC0003DMG400032104,PGSC0003DMG400009433,PGSC0003DMG400000180,PGSC0003DMG400000566,Novel01118,PGSC0003DMG400012196
GO:1902493	acetyltransferase complex	cellular_component	0.01872	1	9	2387	47	29181	PGSC0003DMG400000180,PGSC0003DMG400009433,PGSC0003DMG400000566,Novel01118,PGSC0003DMG400012196,PGSC0003DMG400031798,PGSC0003DMG400032104,PGSC0003DMG400031248,PGSC0003DMG400030246
GO:0000062	fatty-acyl-CoA binding	molecular_function	0.019429	1	5	2387	18	29181	PGSC0003DMG400022312,PGSC0003DMG400030867,PGSC0003DMG400012193,PGSC0003DMG400024701,PGSC0003DMG401003285
GO:0005515	protein binding	molecular_function	0.019492	1	766	2387	8164	29181	PGSC0003DMG400005742,PGSC0003DMG400011058,PGSC0003DMG400023881,PGSC0003DMG402011367,PGSC0003DMG400020740,PGSC0003DMG404012723,PGSC0003DMG402032501,PGSC0003DMG400004289,PGSC0003DMG400000062,Novel02718,PGSC0003DMG400000663,Novel01065,PGSC0003DMG400005828,PGSC0003DMG400022027,PGSC0003DMG400028578,PGSC0003DMG400029165,PGSC0003DMG400009308,PGSC0003DMG402012256,PGSC0003DMG400016822,PGSC0003DMG400021409…
GO:0051716	cellular response to stimulus	biological_process	0.019663	1	296	2387	3061	29181	PGSC0003DMG402031196,PGSC0003DMG401002242,PGSC0003DMG400018222,PGSC0003DMG402005259,PGSC0003DMG400026403,PGSC0003DMG400028967,PGSC0003DMG400024604,PGSC0003DMG400020039,PGSC0003DMG401020784,PGSC0003DMG400002821,PGSC0003DMG400030425,PGSC0003DMG400018939,PGSC0003DMG400018693,PGSC0003DMG400023569,PGSC0003DMG400030910,PGSC0003DMG400014302,Novel02744,PGSC0003DMG400020089,PGSC0003DMG400028579,PGSC0003DM…
GO:0040029	regulation of gene expression, epigenetic	biological_process	0.019688	1	9	2387	50	29181	PGSC0003DMG400008149,PGSC0003DMG402029795,PGSC0003DMG402002262,PGSC0003DMG400013424,Novel01584,PGSC0003DMG400032269,PGSC0003DMG400027051,PGSC0003DMG400017691,PGSC0003DMG400009321
GO:0030177	positive regulation of Wnt signaling pathway	biological_process	0.01991	1	4	2387	13	29181	PGSC0003DMG400008259,PGSC0003DMG402002053,PGSC0003DMG400020089,PGSC0003DMG400032118
GO:0060070	canonical Wnt signaling pathway	biological_process	0.01991	1	4	2387	13	29181	PGSC0003DMG402002053,PGSC0003DMG400032118,PGSC0003DMG400020089,PGSC0003DMG400008259
GO:0060828	regulation of canonical Wnt signaling pathway	biological_process	0.01991	1	4	2387	13	29181	PGSC0003DMG400008259,PGSC0003DMG400032118,PGSC0003DMG400020089,PGSC0003DMG402002053
GO:0090263	positive regulation of canonical Wnt signaling pathway	biological_process	0.01991	1	4	2387	13	29181	PGSC0003DMG400008259,PGSC0003DMG400020089,PGSC0003DMG400032118,PGSC0003DMG402002053
GO:0006457	protein folding	biological_process	0.020954	1	33	2387	264	29181	PGSC0003DMG400008149,PGSC0003DMG400019647,PGSC0003DMG400010338,PGSC0003DMG400031007,PGSC0003DMG400005361,PGSC0003DMG400014405,PGSC0003DMG400019824,PGSC0003DMG400012696,PGSC0003DMG400002929,PGSC0003DMG400027438,PGSC0003DMG402007138,PGSC0003DMG400012711,PGSC0003DMG400012523,PGSC0003DMG402020115,PGSC0003DMG401020784,PGSC0003DMG400017570,PGSC0003DMG400025806,PGSC0003DMG400029787,PGSC0003DMG400023593,…
GO:0004347	glucose-6-phosphate isomerase activity	molecular_function	0.021348	1	5	2387	19	29181	PGSC0003DMG400027925,PGSC0003DMG400024701,PGSC0003DMG400015392,PGSC0003DMG400014944,PGSC0003DMG400015766
GO:0009378	four-way junction helicase activity	molecular_function	0.021482	1	34	2387	240	29181	PGSC0003DMG402004578,PGSC0003DMG400014225,Novel02174,PGSC0003DMG400024365,PGSC0003DMG400031271,PGSC0003DMG400025545,PGSC0003DMG400003647,PGSC0003DMG400038020,PGSC0003DMG400012653,PGSC0003DMG400020086,PGSC0003DMG400006034,PGSC0003DMG400004149,PGSC0003DMG401013522,PGSC0003DMG400004579,PGSC0003DMG401005337,PGSC0003DMG400003380,Novel02234,PGSC0003DMG400003069,PGSC0003DMG400015492,PGSC0003DMG402029631…
GO:0005507	copper ion binding	molecular_function	0.021716	1	28	2387	212	29181	PGSC0003DMG400004723,PGSC0003DMG400014709,PGSC0003DMG400025436,PGSC0003DMG403003025,PGSC0003DMG402005729,Novel00141,PGSC0003DMG400005515,PGSC0003DMG400019466,Novel00631,PGSC0003DMG400018650,PGSC0003DMG400019523,PGSC0003DMG400016890,PGSC0003DMG400017157,PGSC0003DMG400033566,PGSC0003DMG401026514,PGSC0003DMG400015241,PGSC0003DMG400008882,PGSC0003DMG401008903,PGSC0003DMG400027914,PGSC0003DMG400022713…
GO:0016153	urocanate hydratase activity	molecular_function	0.02192	1	2	2387	3	29181	PGSC0003DMG400031375,PGSC0003DMG401029813
GO:0048472	threonine-phosphate decarboxylase activity	molecular_function	0.022632	1	3	2387	7	29181	PGSC0003DMG400007012,PGSC0003DMG400029879,PGSC0003DMG400024336
GO:0045182	translation regulator activity	molecular_function	0.023194	1	18	2387	105	29181	PGSC0003DMG400001336,PGSC0003DMG401010181,PGSC0003DMG400006026,PGSC0003DMG400016465,PGSC0003DMG400029364,PGSC0003DMG400015232,PGSC0003DMG400039862,PGSC0003DMG400029725,PGSC0003DMG400002145,PGSC0003DMG400014444,PGSC0003DMG402012933,PGSC0003DMG400002757,PGSC0003DMG400006128,PGSC0003DMG400025475,PGSC0003DMG400013693,PGSC0003DMG400011207,PGSC0003DMG400019475,PGSC0003DMG400000099
GO:0044724	single-organism carbohydrate catabolic process	biological_process	0.023414	1	18	2387	122	29181	PGSC0003DMG400010691,PGSC0003DMG401000287,PGSC0003DMG400027321,PGSC0003DMG400014944,PGSC0003DMG400010334,PGSC0003DMG400003882,PGSC0003DMG400027925,Novel01389,PGSC0003DMG400015766,PGSC0003DMG402027860,PGSC0003DMG400001998,PGSC0003DMG400019734,PGSC0003DMG400022352,PGSC0003DMG400010007,PGSC0003DMG400024220,PGSC0003DMG400015392,PGSC0003DMG400024701,PGSC0003DMG400010913
GO:0006165	nucleoside diphosphate phosphorylation	biological_process	0.024467	1	14	2387	89	29181	PGSC0003DMG400027321,PGSC0003DMG400019734,PGSC0003DMG400010007,PGSC0003DMG400015766,PGSC0003DMG402027860,PGSC0003DMG400010691,PGSC0003DMG400027925,PGSC0003DMG400024701,Novel01389,PGSC0003DMG400010913,PGSC0003DMG400024220,PGSC0003DMG400014944,PGSC0003DMG400003882,PGSC0003DMG400015392
GO:0046939	nucleotide phosphorylation	biological_process	0.024467	1	14	2387	89	29181	PGSC0003DMG400003882,PGSC0003DMG400015392,PGSC0003DMG400014944,PGSC0003DMG400024220,PGSC0003DMG400010913,PGSC0003DMG400027925,PGSC0003DMG400024701,Novel01389,PGSC0003DMG402027860,PGSC0003DMG400010691,PGSC0003DMG400015766,PGSC0003DMG400010007,PGSC0003DMG400027321,PGSC0003DMG400019734
GO:0042173	regulation of sporulation resulting in formation of a cellular spore	biological_process	0.025393	1	4	2387	13	29181	PGSC0003DMG400027323,PGSC0003DMG402024549,PGSC0003DMG400021255,PGSC0003DMG400001544
GO:0043937	regulation of sporulation	biological_process	0.025393	1	4	2387	13	29181	PGSC0003DMG402024549,PGSC0003DMG400027323,PGSC0003DMG400001544,PGSC0003DMG400021255
GO:0016052	carbohydrate catabolic process	biological_process	0.025975	1	25	2387	186	29181	PGSC0003DMG400015766,PGSC0003DMG400030684,PGSC0003DMG402027860,PGSC0003DMG400001998,PGSC0003DMG400019734,PGSC0003DMG400040684,PGSC0003DMG400022352,PGSC0003DMG400010007,PGSC0003DMG402020509,PGSC0003DMG400019332,PGSC0003DMG400024220,PGSC0003DMG400015392,PGSC0003DMG400006048,PGSC0003DMG400024701,PGSC0003DMG400010913,PGSC0003DMG400010691,PGSC0003DMG400010897,PGSC0003DMG400010664,PGSC0003DMG400027321,…
GO:0043938	positive regulation of sporulation	biological_process	0.026578	1	2	2387	3	29181	PGSC0003DMG400021255,PGSC0003DMG402024549
GO:0045597	positive regulation of cell differentiation	biological_process	0.026578	1	2	2387	3	29181	PGSC0003DMG402024549,PGSC0003DMG400021255
GO:0045881	positive regulation of sporulation resulting in formation of a cellular spore	biological_process	0.026578	1	2	2387	3	29181	PGSC0003DMG400021255,PGSC0003DMG402024549
GO:0006400	tRNA modification	biological_process	0.026635	1	37	2387	282	29181	PGSC0003DMG400022027,Novel02713,PGSC0003DMG400026493,PGSC0003DMG400008871,PGSC0003DMG402031196,PGSC0003DMG402016772,PGSC0003DMG401029267,PGSC0003DMG400015506,PGSC0003DMG400003882,PGSC0003DMG400008801,PGSC0003DMG400012408,PGSC0003DMG400022209,PGSC0003DMG402029631,Novel01267,PGSC0003DMG400023319,PGSC0003DMG400003614,PGSC0003DMG401003154,PGSC0003DMG400011479,PGSC0003DMG400001543,PGSC0003DMG400007496…
GO:0003747	translation release factor activity	molecular_function	0.02681	1	7	2387	36	29181	PGSC0003DMG400031271,PGSC0003DMG402005733,PGSC0003DMG400008719,PGSC0003DMG400028158,PGSC0003DMG400023478,Novel01234,PGSC0003DMG400003882
GO:0008079	translation termination factor activity	molecular_function	0.02681	1	7	2387	36	29181	PGSC0003DMG402005733,PGSC0003DMG400031271,PGSC0003DMG400003882,PGSC0003DMG400023478,PGSC0003DMG400028158,Novel01234,PGSC0003DMG400008719
GO:0005984	disaccharide metabolic process	biological_process	0.026959	1	13	2387	77	29181	PGSC0003DMG400010556,PGSC0003DMG400013809,PGSC0003DMG401017546,PGSC0003DMG400026428,PGSC0003DMG400021341,PGSC0003DMG400006509,PGSC0003DMG400013857,PGSC0003DMG400009279,PGSC0003DMG400027449,PGSC0003DMG400022352,Novel02532,PGSC0003DMG400020619,PGSC0003DMG400030849
GO:0006614	SRP-dependent cotranslational protein targeting to membrane	biological_process	0.027825	1	23	2387	160	29181	PGSC0003DMG400010619,PGSC0003DMG400008871,PGSC0003DMG401029267,PGSC0003DMG400020587,PGSC0003DMG400003647,PGSC0003DMG400026493,PGSC0003DMG400031248,PGSC0003DMG400024365,Novel02118,PGSC0003DMG401016933,PGSC0003DMG402029631,PGSC0003DMG402000927,PGSC0003DMG400010007,PGSC0003DMG400024126,Novel01267,PGSC0003DMG400021343,PGSC0003DMG402029267,PGSC0003DMG400018116,PGSC0003DMG401015043,PGSC0003DMG400010127…
GO:0045047	protein targeting to ER	biological_process	0.027825	1	23	2387	160	29181	PGSC0003DMG400003647,PGSC0003DMG400020587,PGSC0003DMG400026493,PGSC0003DMG401029267,PGSC0003DMG400010619,PGSC0003DMG400008871,PGSC0003DMG402029631,PGSC0003DMG402000927,PGSC0003DMG400024365,PGSC0003DMG400031248,Novel02118,PGSC0003DMG401016933,PGSC0003DMG400021343,Novel01267,PGSC0003DMG400024126,PGSC0003DMG400010007,PGSC0003DMG401003154,PGSC0003DMG401015043,PGSC0003DMG400010127,PGSC0003DMG400007496…
GO:0072599	establishment of protein localization to endoplasmic reticulum	biological_process	0.027825	1	23	2387	160	29181	PGSC0003DMG402000927,PGSC0003DMG402029631,PGSC0003DMG400024365,PGSC0003DMG400031248,Novel02118,PGSC0003DMG401016933,PGSC0003DMG401029267,PGSC0003DMG400008871,PGSC0003DMG400010619,PGSC0003DMG400020587,PGSC0003DMG400003647,PGSC0003DMG400026493,PGSC0003DMG401015043,PGSC0003DMG400010127,PGSC0003DMG400007496,PGSC0003DMG400021177,PGSC0003DMG402029267,PGSC0003DMG400018116,PGSC0003DMG401003154,PGSC0003DM…
GO:0003993	acid phosphatase activity	molecular_function	0.028564	1	9	2387	50	29181	PGSC0003DMG400018838,PGSC0003DMG400027427,PGSC0003DMG402008019,PGSC0003DMG400018839,PGSC0003DMG400009075,PGSC0003DMG400017958,PGSC0003DMG400003757,PGSC0003DMG400031194,PGSC0003DMG402016574
GO:0007249	I-kappaB kinase/NF-kappaB signaling	biological_process	0.028588	1	5	2387	20	29181	PGSC0003DMG401027561,Novel03299,PGSC0003DMG400016820,PGSC0003DMG400030663,PGSC0003DMG400031007
GO:0043122	regulation of I-kappaB kinase/NF-kappaB signaling	biological_process	0.028588	1	5	2387	20	29181	PGSC0003DMG400031007,PGSC0003DMG400030663,PGSC0003DMG400016820,Novel03299,PGSC0003DMG401027561
GO:0043123	positive regulation of I-kappaB kinase/NF-kappaB signaling	biological_process	0.028588	1	5	2387	20	29181	PGSC0003DMG400031007,PGSC0003DMG401027561,PGSC0003DMG400016820,Novel03299,PGSC0003DMG400030663
GO:0010608	posttranscriptional regulation of gene expression	biological_process	0.028978	1	27	2387	189	29181	PGSC0003DMG400030519,PGSC0003DMG400025475,PGSC0003DMG400026641,PGSC0003DMG400013693,PGSC0003DMG400025847,PGSC0003DMG400022893,PGSC0003DMG400019475,PGSC0003DMG400011207,PGSC0003DMG400000716,Novel00814,PGSC0003DMG400000099,PGSC0003DMG400014444,PGSC0003DMG402028565,PGSC0003DMG402012933,PGSC0003DMG400002757,PGSC0003DMG400006128,PGSC0003DMG400039862,PGSC0003DMG400003564,PGSC0003DMG400002145,PGSC0003DM…
GO:0003879	ATP phosphoribosyltransferase activity	molecular_function	0.029327	1	4	2387	13	29181	PGSC0003DMG400018421,PGSC0003DMG400005675,PGSC0003DMG400024926,PGSC0003DMG400020344
GO:1902533	positive regulation of intracellular signal transduction	biological_process	0.029417	1	8	2387	42	29181	Novel03299,PGSC0003DMG400016820,PGSC0003DMG400030663,Novel00308,PGSC0003DMG401027561,PGSC0003DMG400000399,PGSC0003DMG400031007,PGSC0003DMG400027204
GO:0009235	cobalamin metabolic process	biological_process	0.029566	1	18	2387	132	29181	PGSC0003DMG400003540,PGSC0003DMG400032110,PGSC0003DMG401000287,PGSC0003DMG400022418,PGSC0003DMG402004423,PGSC0003DMG400027323,PGSC0003DMG400019717,PGSC0003DMG400032104,PGSC0003DMG400007012,PGSC0003DMG400009122,PGSC0003DMG400026577,PGSC0003DMG400024336,PGSC0003DMG400026534,PGSC0003DMG400023636,PGSC0003DMG402003505,PGSC0003DMG400029879,PGSC0003DMG400007496,PGSC0003DMG400010413
GO:0015889	cobalamin transport	biological_process	0.029833	1	3	2387	8	29181	PGSC0003DMG400032792,PGSC0003DMG400000583,PGSC0003DMG400020708
GO:0019069	viral capsid assembly	biological_process	0.029947	1	11	2387	74	29181	PGSC0003DMG400031833,PGSC0003DMG400000566,PGSC0003DMG400006835,Novel03367,PGSC0003DMG400016203,PGSC0003DMG400030849,PGSC0003DMG400029165,PGSC0003DMG400023636,PGSC0003DMG400001378,PGSC0003DMG400024772,PGSC0003DMG400025126
GO:0005777	peroxisome	cellular_component	0.030068	1	13	2387	88	29181	PGSC0003DMG400029165,PGSC0003DMG400027002,PGSC0003DMG400020620,PGSC0003DMG400020619,PGSC0003DMG400026436,PGSC0003DMG400020119,Novel02174,PGSC0003DMG400005328,PGSC0003DMG401010181,PGSC0003DMG400020136,PGSC0003DMG400001391,PGSC0003DMG400006457,PGSC0003DMG400027850
GO:0042579	microbody	cellular_component	0.030068	1	13	2387	88	29181	PGSC0003DMG400001391,PGSC0003DMG400006457,PGSC0003DMG400020136,PGSC0003DMG400027850,PGSC0003DMG400027002,PGSC0003DMG400029165,PGSC0003DMG400020619,PGSC0003DMG400026436,PGSC0003DMG400020620,PGSC0003DMG401010181,PGSC0003DMG400005328,Novel02174,PGSC0003DMG400020119
GO:0004133	glycogen debranching enzyme activity	molecular_function	0.030102	1	2	2387	3	29181	Novel01414,PGSC0003DMG400016589
GO:0004134	4-alpha-glucanotransferase activity	molecular_function	0.030102	1	2	2387	3	29181	Novel01414,PGSC0003DMG400016589
GO:0003864	3-methyl-2-oxobutanoate hydroxymethyltransferase activity	molecular_function	0.03094	1	2	2387	4	29181	PGSC0003DMG400025194,PGSC0003DMG400003882
GO:0008097	5S rRNA binding	molecular_function	0.031724	1	3	2387	9	29181	PGSC0003DMG400035769,PGSC0003DMG402027032,PGSC0003DMG401010657
GO:0000103	sulfate assimilation	biological_process	0.032078	1	10	2387	54	29181	PGSC0003DMG400005786,Novel01787,PGSC0003DMG400024571,PGSC0003DMG400007496,PGSC0003DMG402029267,PGSC0003DMG400024365,PGSC0003DMG400003078,PGSC0003DMG401029267,PGSC0003DMG400008871,PGSC0003DMG401005337
GO:0004020	adenylylsulfate kinase activity	molecular_function	0.032078	1	10	2387	54	29181	PGSC0003DMG401029267,PGSC0003DMG400008871,PGSC0003DMG401005337,PGSC0003DMG400003078,PGSC0003DMG400024571,Novel01787,PGSC0003DMG400007496,PGSC0003DMG400024365,PGSC0003DMG402029267,PGSC0003DMG400005786
GO:0009607	response to biotic stimulus	biological_process	0.032108	1	55	2387	543	29181	PGSC0003DMG400030243,PGSC0003DMG402021193,PGSC0003DMG400001858,PGSC0003DMG400022094,PGSC0003DMG400013857,PGSC0003DMG400030115,PGSC0003DMG400018875,PGSC0003DMG400021421,PGSC0003DMG400001099,PGSC0003DMG400042669,PGSC0003DMG400004723,PGSC0003DMG400024926,PGSC0003DMG400015075,PGSC0003DMG400003647,PGSC0003DMG400011033,PGSC0003DMG400013022,PGSC0003DMG400014532,PGSC0003DMG400007760,PGSC0003DMG400008545,…
GO:0009074	aromatic amino acid family catabolic process	biological_process	0.032412	1	5	2387	21	29181	PGSC0003DMG401002654,Novel00393,PGSC0003DMG402000914,PGSC0003DMG400005361,PGSC0003DMG400015330
GO:0070461	SAGA-type complex	cellular_component	0.032424	1	6	2387	27	29181	PGSC0003DMG400009433,PGSC0003DMG400030246,PGSC0003DMG400000566,PGSC0003DMG400031248,PGSC0003DMG400032104,PGSC0003DMG400031798
GO:0006417	regulation of translation	biological_process	0.032619	1	26	2387	183	29181	PGSC0003DMG400025475,PGSC0003DMG400013693,PGSC0003DMG400030519,PGSC0003DMG400025847,PGSC0003DMG400022893,PGSC0003DMG400011207,PGSC0003DMG400019475,PGSC0003DMG400000099,Novel00814,PGSC0003DMG400000716,PGSC0003DMG402028565,PGSC0003DMG400014444,PGSC0003DMG400002757,PGSC0003DMG402012933,PGSC0003DMG400006128,PGSC0003DMG400039862,PGSC0003DMG400003564,PGSC0003DMG400002145,PGSC0003DMG401010181,PGSC0003DM…
GO:0034248	regulation of cellular amide metabolic process	biological_process	0.032619	1	26	2387	183	29181	PGSC0003DMG400002145,PGSC0003DMG400003564,PGSC0003DMG400039862,PGSC0003DMG400010478,PGSC0003DMG400015232,PGSC0003DMG400029364,PGSC0003DMG400016465,PGSC0003DMG400006026,PGSC0003DMG400031029,PGSC0003DMG400001336,PGSC0003DMG401010181,Novel00814,PGSC0003DMG400000099,PGSC0003DMG400000716,PGSC0003DMG400011207,PGSC0003DMG400022893,PGSC0003DMG400019475,PGSC0003DMG400025847,PGSC0003DMG400025475,PGSC0003DM…
GO:0008509	anion transmembrane transporter activity	molecular_function	0.033041	1	29	2387	219	29181	PGSC0003DMG400012239,PGSC0003DMG401031045,PGSC0003DMG402028252,PGSC0003DMG400020136,PGSC0003DMG400005612,PGSC0003DMG400020215,PGSC0003DMG400011330,Novel03229,PGSC0003DMG400021862,PGSC0003DMG400006975,Novel00688,PGSC0003DMG400010866,PGSC0003DMG400004061,PGSC0003DMG400012523,PGSC0003DMG400001391,PGSC0003DMG400011000,PGSC0003DMG400015470,PGSC0003DMG400009290,PGSC0003DMG400005455,PGSC0003DMG400010438…
GO:0009360	DNA polymerase III complex	cellular_component	0.033654	1	7	2387	37	29181	PGSC0003DMG400000462,PGSC0003DMG400005301,PGSC0003DMG400009981,PGSC0003DMG400001398,Novel00239,PGSC0003DMG400003522,PGSC0003DMG400003647
GO:0042575	DNA polymerase complex	cellular_component	0.033654	1	7	2387	37	29181	PGSC0003DMG400000462,PGSC0003DMG400005301,PGSC0003DMG400009981,PGSC0003DMG400001398,Novel00239,PGSC0003DMG400003647,PGSC0003DMG400003522
GO:0055086	nucleobase-containing small molecule metabolic process	biological_process	0.034115	1	86	2387	825	29181	PGSC0003DMG400024220,PGSC0003DMG400022885,PGSC0003DMG400010913,PGSC0003DMG400023191,PGSC0003DMG400014217,PGSC0003DMG400029615,PGSC0003DMG400005256,PGSC0003DMG402027860,PGSC0003DMG400030100,PGSC0003DMG400021607,PGSC0003DMG400013857,PGSC0003DMG401000923,PGSC0003DMG400022893,PGSC0003DMG400014944,PGSC0003DMG400027693,PGSC0003DMG400004814,PGSC0003DMG400031029,Novel00051,PGSC0003DMG400034307,PGSC0003DM…
GO:0023052	signaling	biological_process	0.037263	1	213	2387	2215	29181	PGSC0003DMG400009584,PGSC0003DMG400005745,PGSC0003DMG400025162,PGSC0003DMG400002799,PGSC0003DMG400017053,PGSC0003DMG402023851,PGSC0003DMG400021719,PGSC0003DMG402006561,PGSC0003DMG400032509,PGSC0003DMG400025024,PGSC0003DMG402018008,PGSC0003DMG400019178,PGSC0003DMG401024871,PGSC0003DMG400039297,PGSC0003DMG400005902,PGSC0003DMG400016284,PGSC0003DMG400020484,PGSC0003DMG400000695,PGSC0003DMG400020951,…
GO:0071949	FAD binding	molecular_function	0.037298	1	15	2387	98	29181	Novel01333,PGSC0003DMG400013638,PGSC0003DMG402006147,PGSC0003DMG400004844,PGSC0003DMG400019257,PGSC0003DMG400017211,PGSC0003DMG400024294,PGSC0003DMG400006822,PGSC0003DMG400027514,PGSC0003DMG400029626,PGSC0003DMG400006854,PGSC0003DMG400014873,PGSC0003DMG400004020,PGSC0003DMG400019718,PGSC0003DMG402003505
GO:0006415	translational termination	biological_process	0.037438	1	8	2387	48	29181	PGSC0003DMG400008719,Novel01234,PGSC0003DMG400003882,PGSC0003DMG400031271,PGSC0003DMG402005733,PGSC0003DMG400028158,PGSC0003DMG400023478,PGSC0003DMG400030519
GO:0007165	signal transduction	biological_process	0.037608	1	209	2387	2173	29181	PGSC0003DMG400027131,PGSC0003DMG400017581,PGSC0003DMG400010944,PGSC0003DMG400020261,PGSC0003DMG400006327,PGSC0003DMG400013943,PGSC0003DMG400025263,PGSC0003DMG400028924,Novel02292,PGSC0003DMG400031248,PGSC0003DMG400024953,PGSC0003DMG400025041,PGSC0003DMG400013629,PGSC0003DMG400020170,PGSC0003DMG402025863,PGSC0003DMG400027046,PGSC0003DMG400027204,PGSC0003DMG400027048,PGSC0003DMG400015330,PGSC0003DM…
GO:0018144	RNA-protein covalent cross-linking	biological_process	0.038974	1	4	2387	16	29181	PGSC0003DMG400000498,PGSC0003DMG400015253,PGSC0003DMG400017751,PGSC0003DMG400018196
GO:0008131	primary amine oxidase activity	molecular_function	0.039555	1	6	2387	28	29181	Novel00141,PGSC0003DMG400004723,PGSC0003DMG400023306,PGSC0003DMG400017203,PGSC0003DMG400017157,PGSC0003DMG400013073
GO:0044700	single organism signaling	biological_process	0.039869	1	212	2387	2208	29181	PGSC0003DMG401008903,PGSC0003DMG400012554,PGSC0003DMG400013627,PGSC0003DMG400009098,Novel02622,PGSC0003DMG400003319,PGSC0003DMG400025519,PGSC0003DMG400030714,PGSC0003DMG400021177,PGSC0003DMG400027061,PGSC0003DMG400017440,PGSC0003DMG400036536,PGSC0003DMG400021168,PGSC0003DMG400029725,PGSC0003DMG400003564,PGSC0003DMG400001123,PGSC0003DMG400022417,PGSC0003DMG400028520,PGSC0003DMG400004233,PGSC0003DM…
GO:0016667	oxidoreductase activity, acting on a sulfur group of donors	molecular_function	0.04002	1	23	2387	210	29181	PGSC0003DMG400006428,PGSC0003DMG400030449,PGSC0003DMG400003581,PGSC0003DMG400004061,PGSC0003DMG400016032,PGSC0003DMG400030784,PGSC0003DMG400024986,PGSC0003DMG400001120,PGSC0003DMG400030311,PGSC0003DMG400010461,PGSC0003DMG400005335,PGSC0003DMG400003634,PGSC0003DMG400019124,PGSC0003DMG400003747,PGSC0003DMG400018157,PGSC0003DMG400016573,PGSC0003DMG400001157,PGSC0003DMG402027256,PGSC0003DMG400004750,…
GO:0005253	anion channel activity	molecular_function	0.04051	1	6	2387	28	29181	PGSC0003DMG400011330,PGSC0003DMG400020215,PGSC0003DMG400006975,PGSC0003DMG400021862,PGSC0003DMG400022186,PGSC0003DMG401031045
GO:0018143	nucleic acid-protein covalent cross-linking	biological_process	0.041016	1	5	2387	23	29181	PGSC0003DMG400012554,PGSC0003DMG400018196,PGSC0003DMG400017751,PGSC0003DMG400015253,PGSC0003DMG400000498
GO:0050151	oleate hydratase activity	molecular_function	0.041097	1	3	2387	8	29181	PGSC0003DMG402006147,PGSC0003DMG402003505,PGSC0003DMG400006854
GO:0017080	sodium channel regulator activity	molecular_function	0.041848	1	11	2387	71	29181	PGSC0003DMG400008563,PGSC0003DMG400023710,PGSC0003DMG400027770,PGSC0003DMG400024752,PGSC0003DMG400018875,PGSC0003DMG401017546,PGSC0003DMG400003381,PGSC0003DMG400009821,PGSC0003DMG400031029,PGSC0003DMG400011175,PGSC0003DMG400011414
GO:0019871	sodium channel inhibitor activity	molecular_function	0.041848	1	11	2387	71	29181	PGSC0003DMG400008563,PGSC0003DMG400023710,PGSC0003DMG400024752,PGSC0003DMG400027770,PGSC0003DMG400018875,PGSC0003DMG401017546,PGSC0003DMG400003381,PGSC0003DMG400009821,PGSC0003DMG400031029,PGSC0003DMG400011175,PGSC0003DMG400011414
GO:0016641	oxidoreductase activity, acting on the CH-NH2 group of donors, oxygen as acceptor	molecular_function	0.041978	1	8	2387	45	29181	PGSC0003DMG400022093,PGSC0003DMG400013073,PGSC0003DMG400023306,PGSC0003DMG400017203,Novel00141,PGSC0003DMG400017157,PGSC0003DMG401026514,PGSC0003DMG400004723
GO:0042393	histone binding	molecular_function	0.042026	1	12	2387	78	29181	PGSC0003DMG400011058,PGSC0003DMG402028796,PGSC0003DMG402002977,Novel00287,PGSC0003DMG400011359,PGSC0003DMG400018261,PGSC0003DMG400011022,PGSC0003DMG400020951,PGSC0003DMG400021659,PGSC0003DMG400024655,PGSC0003DMG400008660,PGSC0003DMG400019178
GO:0005313	L-glutamate transmembrane transporter activity	molecular_function	0.042028	1	2	2387	4	29181	PGSC0003DMG400004061,PGSC0003DMG400030519
GO:0015172	acidic amino acid transmembrane transporter activity	molecular_function	0.042028	1	2	2387	4	29181	PGSC0003DMG400004061,PGSC0003DMG400030519
GO:0015501	glutamate:sodium symporter activity	molecular_function	0.042028	1	2	2387	4	29181	PGSC0003DMG400030519,PGSC0003DMG400004061
GO:0015800	acidic amino acid transport	biological_process	0.042028	1	2	2387	4	29181	PGSC0003DMG400030519,PGSC0003DMG400004061
GO:0015807	L-amino acid transport	biological_process	0.042028	1	2	2387	4	29181	PGSC0003DMG400004061,PGSC0003DMG400030519
GO:0015813	L-glutamate transport	biological_process	0.042028	1	2	2387	4	29181	PGSC0003DMG400030519,PGSC0003DMG400004061
GO:0009314	response to radiation	biological_process	0.042227	1	10	2387	60	29181	PGSC0003DMG400015766,PGSC0003DMG400020541,PGSC0003DMG400025519,PGSC0003DMG400003072,PGSC0003DMG400041458,Novel01891,PGSC0003DMG400025752,Novel03396,PGSC0003DMG400027594,PGSC0003DMG400021789
GO:0003678	DNA helicase activity	molecular_function	0.042258	1	51	2387	422	29181	PGSC0003DMG403026842,PGSC0003DMG400018693,PGSC0003DMG402029631,Novel02118,PGSC0003DMG400012761,PGSC0003DMG400015506,PGSC0003DMG400019083,PGSC0003DMG400018222,PGSC0003DMG401002242,PGSC0003DMG402016772,PGSC0003DMG402014864,PGSC0003DMG400010157,PGSC0003DMG400025511,PGSC0003DMG400008871,PGSC0003DMG400026493,Novel02713,Novel00239,PGSC0003DMG400007496,PGSC0003DMG400017061,PGSC0003DMG402002262,PGSC0003D…
GO:0007154	cell communication	biological_process	0.042436	1	228	2387	2372	29181	PGSC0003DMG400009584,PGSC0003DMG400025162,PGSC0003DMG400005745,PGSC0003DMG400002799,PGSC0003DMG400017053,PGSC0003DMG402023851,PGSC0003DMG402006561,PGSC0003DMG400021719,PGSC0003DMG400032509,PGSC0003DMG400025024,PGSC0003DMG402018008,PGSC0003DMG400019178,PGSC0003DMG400039297,PGSC0003DMG401024871,PGSC0003DMG400005902,PGSC0003DMG400016284,PGSC0003DMG400000695,PGSC0003DMG400020484,PGSC0003DMG400020951,…
GO:0016638	oxidoreductase activity, acting on the CH-NH2 group of donors	molecular_function	0.042801	1	15	2387	106	29181	PGSC0003DMG400017157,PGSC0003DMG401026514,PGSC0003DMG400004723,PGSC0003DMG400015194,PGSC0003DMG400022093,PGSC0003DMG400013073,PGSC0003DMG400020541,PGSC0003DMG400023306,PGSC0003DMG400017203,Novel02718,PGSC0003DMG400021343,PGSC0003DMG400021248,PGSC0003DMG400002593,PGSC0003DMG400027131,Novel00141
GO:0009311	oligosaccharide metabolic process	biological_process	0.043038	1	21	2387	157	29181	PGSC0003DMG400033932,Novel03182,PGSC0003DMG400003614,PGSC0003DMG400006829,PGSC0003DMG400013857,PGSC0003DMG400009279,PGSC0003DMG400027449,PGSC0003DMG400022352,PGSC0003DMG400020785,PGSC0003DMG400013809,PGSC0003DMG400021341,PGSC0003DMG400030849,PGSC0003DMG400020619,PGSC0003DMG400002021,PGSC0003DMG400002773,Novel02532,PGSC0003DMG400006509,PGSC0003DMG401017546,PGSC0003DMG400026428,PGSC0003DMG400005828…
GO:0046034	ATP metabolic process	biological_process	0.043097	1	49	2387	453	29181	PGSC0003DMG400010691,PGSC0003DMG400022825,PGSC0003DMG401029267,PGSC0003DMG400027321,PGSC0003DMG400003906,PGSC0003DMG400022770,PGSC0003DMG400003882,PGSC0003DMG400020740,Novel01389,PGSC0003DMG400027925,PGSC0003DMG400015766,PGSC0003DMG400010007,PGSC0003DMG400022417,Novel03007,PGSC0003DMG400015392,PGSC0003DMG400032558,PGSC0003DMG400020497,PGSC0003DMG400024701,PGSC0003DMG400013550,PGSC0003DMG402026306…
GO:0007034	vacuolar transport	biological_process	0.044172	1	7	2387	39	29181	PGSC0003DMG400025861,PGSC0003DMG400022345,PGSC0003DMG400022209,Novel01254,PGSC0003DMG400023317,Novel01253,PGSC0003DMG400014701
GO:0005488	binding	molecular_function	0.044789	1	1595	2387	18221	29181	PGSC0003DMG400017515,PGSC0003DMG400001571,PGSC0003DMG400009307,PGSC0003DMG400009989,PGSC0003DMG400031765,PGSC0003DMG400012711,Novel00287,PGSC0003DMG400006158,PGSC0003DMG400001406,Novel02402,PGSC0003DMG400035689,PGSC0003DMG400014914,PGSC0003DMG400003906,PGSC0003DMG400016608,PGSC0003DMG400015534,PGSC0003DMG401029813,PGSC0003DMG400028672,PGSC0003DMG400022019,Novel03523,Novel00322,PGSC0003DMG40002856…
GO:0046351	disaccharide biosynthetic process	biological_process	0.045007	1	9	2387	51	29181	PGSC0003DMG400013809,PGSC0003DMG401017546,PGSC0003DMG400021341,PGSC0003DMG400010556,PGSC0003DMG400013857,PGSC0003DMG400027449,PGSC0003DMG400009279,PGSC0003DMG400020619,PGSC0003DMG400030849
GO:0008083	growth factor activity	molecular_function	0.04526	1	18	2387	146	29181	PGSC0003DMG400021407,PGSC0003DMG400000646,PGSC0003DMG400029898,PGSC0003DMG400007001,PGSC0003DMG400023478,PGSC0003DMG400006185,PGSC0003DMG400020520,PGSC0003DMG400023909,PGSC0003DMG400004243,PGSC0003DMG400025738,PGSC0003DMG400011624,PGSC0003DMG401023104,PGSC0003DMG400023910,PGSC0003DMG400021406,PGSC0003DMG400004349,PGSC0003DMG401002242,PGSC0003DMG400012991,PGSC0003DMG400000695
GO:0009966	regulation of signal transduction	biological_process	0.046065	1	27	2387	221	29181	PGSC0003DMG400005742,PGSC0003DMG400025174,PGSC0003DMG400000399,PGSC0003DMG400028924,PGSC0003DMG400019203,PGSC0003DMG400024953,PGSC0003DMG400023467,Novel02038,PGSC0003DMG400032187,PGSC0003DMG402002053,PGSC0003DMG400000932,PGSC0003DMG400007381,PGSC0003DMG400028276,PGSC0003DMG400031007,PGSC0003DMG401027561,Novel00308,PGSC0003DMG400030322,PGSC0003DMG402023851,PGSC0003DMG400030663,Novel03299,PGSC0003D…
GO:0004637	phosphoribosylamine-glycine ligase activity	molecular_function	0.047185	1	3	2387	11	29181	PGSC0003DMG400023754,PGSC0003DMG400024886,PGSC0003DMG400007169
GO:0006144	purine nucleobase metabolic process	biological_process	0.047185	1	3	2387	11	29181	PGSC0003DMG400023754,PGSC0003DMG400007169,PGSC0003DMG400024886
GO:0009113	purine nucleobase biosynthetic process	biological_process	0.047185	1	3	2387	11	29181	PGSC0003DMG400023754,PGSC0003DMG400007169,PGSC0003DMG400024886
GO:0009126	purine nucleoside monophosphate metabolic process	biological_process	0.047476	1	51	2387	476	29181	PGSC0003DMG400000367,PGSC0003DMG400007092,PGSC0003DMG400024220,PGSC0003DMG400005926,PGSC0003DMG400016820,PGSC0003DMG400010913,PGSC0003DMG400013106,PGSC0003DMG400030714,PGSC0003DMG402027860,PGSC0003DMG400021607,PGSC0003DMG400025519,PGSC0003DMG400014217,PGSC0003DMG400029615,PGSC0003DMG400005256,PGSC0003DMG400022893,PGSC0003DMG400013857,PGSC0003DMG402019176,PGSC0003DMG400019734,PGSC0003DMG400014944,…
GO:0009167	purine ribonucleoside monophosphate metabolic process	biological_process	0.047476	1	51	2387	476	29181	PGSC0003DMG400005926,PGSC0003DMG400016820,PGSC0003DMG400024220,PGSC0003DMG400007092,PGSC0003DMG400000367,PGSC0003DMG400030714,PGSC0003DMG400013106,PGSC0003DMG400010913,PGSC0003DMG400029615,PGSC0003DMG400005256,PGSC0003DMG400014217,PGSC0003DMG400025519,PGSC0003DMG400021607,PGSC0003DMG402027860,PGSC0003DMG400019734,PGSC0003DMG402019176,PGSC0003DMG400013857,PGSC0003DMG400022893,PGSC0003DMG400027693,…
GO:0032502	developmental process	biological_process	0.047612	1	87	2387	844	29181	PGSC0003DMG400010710,PGSC0003DMG402015928,PGSC0003DMG400022299,PGSC0003DMG400021123,PGSC0003DMG400027002,PGSC0003DMG400027703,PGSC0003DMG400019615,PGSC0003DMG400005904,PGSC0003DMG400016019,PGSC0003DMG400016544,PGSC0003DMG400018875,PGSC0003DMG400021253,PGSC0003DMG400032839,PGSC0003DMG400025974,PGSC0003DMG400026989,PGSC0003DMG400032166,PGSC0003DMG401032194,PGSC0003DMG400006354,PGSC0003DMG400027964,…
GO:0009141	nucleoside triphosphate metabolic process	biological_process	0.047661	1	51	2387	476	29181	PGSC0003DMG400021607,PGSC0003DMG402027860,PGSC0003DMG400005256,PGSC0003DMG400029615,PGSC0003DMG400025519,PGSC0003DMG400014217,PGSC0003DMG400022893,PGSC0003DMG400019734,PGSC0003DMG402019176,PGSC0003DMG400013857,PGSC0003DMG400000367,PGSC0003DMG400007092,PGSC0003DMG400005926,PGSC0003DMG400024220,PGSC0003DMG400016820,PGSC0003DMG400013106,PGSC0003DMG400010913,PGSC0003DMG400030714,PGSC0003DMG402004751,…
GO:0050660	flavin adenine dinucleotide binding	molecular_function	0.047891	1	32	2387	263	29181	PGSC0003DMG400010007,PGSC0003DMG400004020,PGSC0003DMG400027514,PGSC0003DMG400023436,PGSC0003DMG400006483,PGSC0003DMG400024294,PGSC0003DMG400016729,PGSC0003DMG400024266,PGSC0003DMG400007678,PGSC0003DMG400006822,PGSC0003DMG400022344,PGSC0003DMG402006147,PGSC0003DMG400013638,PGSC0003DMG400009847,PGSC0003DMG400019718,PGSC0003DMG402003505,PGSC0003DMG400014873,PGSC0003DMG400026989,PGSC0003DMG400029626,…
GO:0019954	asexual reproduction	biological_process	0.049005	1	25	2387	222	29181	PGSC0003DMG400001417,PGSC0003DMG400016203,PGSC0003DMG400004980,PGSC0003DMG400022061,PGSC0003DMG400010866,PGSC0003DMG400026989,PGSC0003DMG400012711,PGSC0003DMG400000570,PGSC0003DMG400007092,PGSC0003DMG402024252,PGSC0003DMG400017440,PGSC0003DMG400033569,PGSC0003DMG400027002,PGSC0003DMG400022299,PGSC0003DMG400004704,PGSC0003DMG400019455,PGSC0003DMG401009663,PGSC0003DMG400012653,Novel03379,PGSC0003DM…
GO:0004386	helicase activity	molecular_function	0.049549	1	72	2387	637	29181	PGSC0003DMG400007496,PGSC0003DMG400017061,PGSC0003DMG400001406,PGSC0003DMG400025861,Novel03074,PGSC0003DMG400000311,PGSC0003DMG400041450,PGSC0003DMG400018693,PGSC0003DMG400012761,PGSC0003DMG400018222,PGSC0003DMG401002242,PGSC0003DMG400025511,PGSC0003DMG400020249,PGSC0003DMG400022027,Novel00239,PGSC0003DMG402018585,PGSC0003DMG400021986,Novel02234,Novel02589,PGSC0003DMG400016797,PGSC0003DMG40003127…
GO:0010646	regulation of cell communication	biological_process	0.05021	1	28	2387	233	29181	PGSC0003DMG400007381,PGSC0003DMG400031007,PGSC0003DMG400028276,PGSC0003DMG401027561,Novel03299,PGSC0003DMG400016820,PGSC0003DMG400030322,PGSC0003DMG400030663,PGSC0003DMG402023851,Novel00308,PGSC0003DMG400032118,PGSC0003DMG400020089,PGSC0003DMG400008259,PGSC0003DMG400012554,PGSC0003DMG400027204,Novel02306,PGSC0003DMG400000399,PGSC0003DMG400025174,PGSC0003DMG400005742,PGSC0003DMG400028924,PGSC0003D…
GO:0016730	oxidoreductase activity, acting on iron-sulfur proteins as donors	molecular_function	0.050488	1	5	2387	27	29181	PGSC0003DMG400012696,PGSC0003DMG400009290,PGSC0003DMG400003807,PGSC0003DMG400003821,PGSC0003DMG400040510
GO:0006558	L-phenylalanine metabolic process	biological_process	0.050941	1	4	2387	17	29181	PGSC0003DMG402000914,PGSC0003DMG400025374,PGSC0003DMG400015330,PGSC0003DMG400026364
GO:1902221	erythrose 4-phosphate/phosphoenolpyruvate family amino acid metabolic process	biological_process	0.050941	1	4	2387	17	29181	PGSC0003DMG400026364,PGSC0003DMG400015330,PGSC0003DMG402000914,PGSC0003DMG400025374
GO:0000772	mating pheromone activity	molecular_function	0.051845	1	7	2387	41	29181	PGSC0003DMG400018369,PGSC0003DMG400031765,PGSC0003DMG400025844,PGSC0003DMG400027854,PGSC0003DMG400002773,PGSC0003DMG400025797,PGSC0003DMG400027889
GO:0008899	homoserine O-succinyltransferase activity	molecular_function	0.05212	1	2	2387	5	29181	PGSC0003DMG400019717,PGSC0003DMG400026156
GO:0009092	homoserine metabolic process	biological_process	0.05212	1	2	2387	5	29181	PGSC0003DMG400026156,PGSC0003DMG400019717
GO:0016750	O-succinyltransferase activity	molecular_function	0.05212	1	2	2387	5	29181	PGSC0003DMG400026156,PGSC0003DMG400019717
GO:0019279	L-methionine biosynthetic process from L-homoserine via cystathionine	biological_process	0.05212	1	2	2387	5	29181	PGSC0003DMG400026156,PGSC0003DMG400019717
GO:0019281	L-methionine biosynthetic process from homoserine via O-succinyl-L-homoserine and cystathionine	biological_process	0.05212	1	2	2387	5	29181	PGSC0003DMG400019717,PGSC0003DMG400026156
GO:0071265	L-methionine biosynthetic process	biological_process	0.05212	1	2	2387	5	29181	PGSC0003DMG400019717,PGSC0003DMG400026156
GO:0071266	'de novo' L-methionine biosynthetic process	biological_process	0.05212	1	2	2387	5	29181	PGSC0003DMG400019717,PGSC0003DMG400026156
GO:0008199	ferric iron binding	molecular_function	0.052279	1	6	2387	32	29181	PGSC0003DMG400027119,PGSC0003DMG400008367,PGSC0003DMG400007242,PGSC0003DMG400006102,Novel02198,PGSC0003DMG400028320
GO:0006547	histidine metabolic process	biological_process	0.053349	1	10	2387	67	29181	PGSC0003DMG400020344,PGSC0003DMG400005675,PGSC0003DMG400021248,PGSC0003DMG400023557,PGSC0003DMG400003625,PGSC0003DMG400024926,PGSC0003DMG400002781,PGSC0003DMG400006483,PGSC0003DMG400018421,PGSC0003DMG400024220
GO:0052803	imidazole-containing compound metabolic process	biological_process	0.053349	1	10	2387	67	29181	PGSC0003DMG400021248,PGSC0003DMG400023557,PGSC0003DMG400020344,PGSC0003DMG400005675,PGSC0003DMG400018421,PGSC0003DMG400024220,PGSC0003DMG400024926,PGSC0003DMG400003625,PGSC0003DMG400002781,PGSC0003DMG400006483
GO:0017003	protein-heme linkage	biological_process	0.053356	1	2	2387	4	29181	PGSC0003DMG400009816,PGSC0003DMG400023913
GO:0009116	nucleoside metabolic process	biological_process	0.053532	1	62	2387	593	29181	Novel01389,PGSC0003DMG400027925,PGSC0003DMG400001618,PGSC0003DMG400023171,PGSC0003DMG400020740,PGSC0003DMG400003882,PGSC0003DMG400022770,PGSC0003DMG400003906,PGSC0003DMG400027321,PGSC0003DMG402021921,PGSC0003DMG401029267,PGSC0003DMG401019352,PGSC0003DMG400022825,PGSC0003DMG400010691,PGSC0003DMG400024701,PGSC0003DMG400020497,PGSC0003DMG400032558,PGSC0003DMG400015392,Novel03007,PGSC0003DMG400022417…
GO:0009236	cobalamin biosynthetic process	biological_process	0.054382	1	16	2387	123	29181	PGSC0003DMG400023636,PGSC0003DMG400024336,PGSC0003DMG400026534,PGSC0003DMG400026577,PGSC0003DMG400009122,PGSC0003DMG400007012,PGSC0003DMG400032104,PGSC0003DMG400019717,PGSC0003DMG402004423,PGSC0003DMG400022418,PGSC0003DMG400032110,PGSC0003DMG400003540,PGSC0003DMG400010413,PGSC0003DMG400007496,PGSC0003DMG400029879,PGSC0003DMG402003505
GO:0042301	phosphate ion binding	molecular_function	0.05452	1	5	2387	24	29181	Novel02306,PGSC0003DMG400007346,PGSC0003DMG400013444,PGSC0003DMG400007717,PGSC0003DMG400004168
GO:0070972	protein localization to endoplasmic reticulum	biological_process	0.055087	1	23	2387	173	29181	PGSC0003DMG400010007,PGSC0003DMG400024126,PGSC0003DMG400021343,Novel01267,PGSC0003DMG400018116,PGSC0003DMG402029267,PGSC0003DMG400021177,PGSC0003DMG400007496,PGSC0003DMG400010127,PGSC0003DMG401015043,PGSC0003DMG401003154,PGSC0003DMG400010619,PGSC0003DMG400008871,PGSC0003DMG401029267,PGSC0003DMG400026493,PGSC0003DMG400003647,PGSC0003DMG400020587,Novel02118,PGSC0003DMG401016933,PGSC0003DMG400024365…
GO:0015932	nucleobase-containing compound transmembrane transporter activity	molecular_function	0.055501	1	9	2387	60	29181	PGSC0003DMG400001391,PGSC0003DMG400017581,PGSC0003DMG400024357,PGSC0003DMG400019466,PGSC0003DMG400005612,PGSC0003DMG400007012,PGSC0003DMG400003111,PGSC0003DMG400021255,PGSC0003DMG400011089
GO:0009161	ribonucleoside monophosphate metabolic process	biological_process	0.056157	1	52	2387	491	29181	PGSC0003DMG400015392,PGSC0003DMG400032558,PGSC0003DMG400020497,PGSC0003DMG400024701,PGSC0003DMG400015766,PGSC0003DMG400010007,Novel03007,PGSC0003DMG400022417,PGSC0003DMG400003906,PGSC0003DMG400022770,PGSC0003DMG400003882,PGSC0003DMG400020740,PGSC0003DMG400023636,PGSC0003DMG400004995,PGSC0003DMG400027925,Novel01389,PGSC0003DMG400010691,PGSC0003DMG400022825,PGSC0003DMG401029267,PGSC0003DMG400027321…
GO:0007532	regulation of mating-type specific transcription, DNA-templated	biological_process	0.056161	1	2	2387	4	29181	PGSC0003DMG402009663,PGSC0003DMG400021659
GO:0008301	DNA binding, bending	molecular_function	0.056161	1	2	2387	4	29181	PGSC0003DMG400021659,PGSC0003DMG402009663
GO:0045895	positive regulation of mating-type specific transcription, DNA-templated	biological_process	0.056161	1	2	2387	4	29181	PGSC0003DMG402009663,PGSC0003DMG400021659
GO:0044275	cellular carbohydrate catabolic process	biological_process	0.057018	1	7	2387	42	29181	PGSC0003DMG400010334,PGSC0003DMG400019332,PGSC0003DMG400030684,PGSC0003DMG400010897,PGSC0003DMG400001998,PGSC0003DMG400022352,PGSC0003DMG401000287
GO:1901657	glycosyl compound metabolic process	biological_process	0.057031	1	62	2387	596	29181	PGSC0003DMG400010691,PGSC0003DMG401019352,PGSC0003DMG400022825,PGSC0003DMG400027321,PGSC0003DMG402021921,PGSC0003DMG401029267,PGSC0003DMG400020740,PGSC0003DMG400003882,PGSC0003DMG400003906,PGSC0003DMG400022770,PGSC0003DMG400023171,PGSC0003DMG400027925,PGSC0003DMG400001618,Novel01389,PGSC0003DMG400015766,PGSC0003DMG400022417,Novel03007,PGSC0003DMG400010007,PGSC0003DMG400015392,PGSC0003DMG400032558…
GO:1901360	organic cyclic compound metabolic process	biological_process	0.057112	1	770	2387	8666	29181	PGSC0003DMG400013550,PGSC0003DMG400012924,PGSC0003DMG400006854,PGSC0003DMG400030071,PGSC0003DMG400026643,PGSC0003DMG400026211,PGSC0003DMG400002980,PGSC0003DMG400024888,PGSC0003DMG400007062,PGSC0003DMG400003411,PGSC0003DMG400014431,PGSC0003DMG400027208,Novel01333,PGSC0003DMG401006771,Novel03367,PGSC0003DMG400007016,PGSC0003DMG400032792,PGSC0003DMG400018875,PGSC0003DMG400015549,PGSC0003DMG400002235…
GO:0000295	adenine nucleotide transmembrane transporter activity	molecular_function	0.057448	1	3	2387	10	29181	PGSC0003DMG400024357,PGSC0003DMG400005612,PGSC0003DMG400001391
GO:0005346	purine ribonucleotide transmembrane transporter activity	molecular_function	0.057448	1	3	2387	10	29181	PGSC0003DMG400001391,PGSC0003DMG400024357,PGSC0003DMG400005612
GO:0005347	ATP transmembrane transporter activity	molecular_function	0.057448	1	3	2387	10	29181	PGSC0003DMG400001391,PGSC0003DMG400005612,PGSC0003DMG400024357
GO:0005471	ATP:ADP antiporter activity	molecular_function	0.057448	1	3	2387	10	29181	PGSC0003DMG400005612,PGSC0003DMG400024357,PGSC0003DMG400001391
GO:0015211	purine nucleoside transmembrane transporter activity	molecular_function	0.057448	1	3	2387	10	29181	PGSC0003DMG400005612,PGSC0003DMG400024357,PGSC0003DMG400001391
GO:0015215	nucleotide transmembrane transporter activity	molecular_function	0.057448	1	3	2387	10	29181	PGSC0003DMG400005612,PGSC0003DMG400024357,PGSC0003DMG400001391
GO:0015216	purine nucleotide transmembrane transporter activity	molecular_function	0.057448	1	3	2387	10	29181	PGSC0003DMG400024357,PGSC0003DMG400005612,PGSC0003DMG400001391
GO:0015217	ADP transmembrane transporter activity	molecular_function	0.057448	1	3	2387	10	29181	PGSC0003DMG400005612,PGSC0003DMG400024357,PGSC0003DMG400001391
GO:0015301	anion:anion antiporter activity	molecular_function	0.057448	1	3	2387	10	29181	PGSC0003DMG400024357,PGSC0003DMG400005612,PGSC0003DMG400001391
GO:0015605	organophosphate ester transmembrane transporter activity	molecular_function	0.057448	1	3	2387	10	29181	PGSC0003DMG400001391,PGSC0003DMG400024357,PGSC0003DMG400005612
GO:0005057	receptor signaling protein activity	molecular_function	0.057745	1	18	2387	142	29181	PGSC0003DMG400003072,Novel01267,PGSC0003DMG400015766,PGSC0003DMG400003503,PGSC0003DMG400004233,PGSC0003DMG400025519,PGSC0003DMG400007242,PGSC0003DMG400031819,Novel03299,PGSC0003DMG400023402,PGSC0003DMG401024871,PGSC0003DMG400016284,PGSC0003DMG400013943,PGSC0003DMG400025263,PGSC0003DMG400034307,PGSC0003DMG402005733,PGSC0003DMG400017186,PGSC0003DMG402025863
GO:0006725	cellular aromatic compound metabolic process	biological_process	0.05837	1	758	2387	8531	29181	PGSC0003DMG400011359,PGSC0003DMG400021719,PGSC0003DMG400029615,PGSC0003DMG400021607,PGSC0003DMG400021214,PGSC0003DMG400017053,PGSC0003DMG400019718,PGSC0003DMG400004814,PGSC0003DMG400031029,PGSC0003DMG402004578,PGSC0003DMG400001378,PGSC0003DMG400019717,PGSC0003DMG400007951,PGSC0003DMG400003647,PGSC0003DMG402000914,PGSC0003DMG400019178,PGSC0003DMG400033028,PGSC0003DMG400021423,PGSC0003DMG400024655,…
GO:0003723	RNA binding	molecular_function	0.058485	1	163	2387	1648	29181	PGSC0003DMG400001694,PGSC0003DMG400010119,PGSC0003DMG400011414,PGSC0003DMG400000070,PGSC0003DMG400022893,PGSC0003DMG400013857,PGSC0003DMG400024126,PGSC0003DMG400030519,PGSC0003DMG400025700,PGSC0003DMG400016997,PGSC0003DMG400015492,PGSC0003DMG400022347,PGSC0003DMG400031248,PGSC0003DMG400029694,PGSC0003DMG400027323,PGSC0003DMG400030510,PGSC0003DMG400014225,PGSC0003DMG400011182,PGSC0003DMG400009953,…
GO:0044413	avoidance of host defenses	biological_process	0.059099	1	9	2387	55	29181	PGSC0003DMG400035689,PGSC0003DMG400008545,PGSC0003DMG400004735,PGSC0003DMG400020519,PGSC0003DMG402021193,PGSC0003DMG400001099,PGSC0003DMG400023341,PGSC0003DMG400006975,PGSC0003DMG400022860
GO:0044415	evasion or tolerance of host defenses	biological_process	0.059099	1	9	2387	55	29181	PGSC0003DMG400008545,PGSC0003DMG400004735,PGSC0003DMG400035689,PGSC0003DMG400020519,PGSC0003DMG402021193,PGSC0003DMG400022860,PGSC0003DMG400006975,PGSC0003DMG400023341,PGSC0003DMG400001099
GO:0051832	avoidance of defenses of other organism involved in symbiotic interaction	biological_process	0.059099	1	9	2387	55	29181	PGSC0003DMG402021193,PGSC0003DMG400022860,PGSC0003DMG400006975,PGSC0003DMG400023341,PGSC0003DMG400001099,PGSC0003DMG400008545,PGSC0003DMG400004735,PGSC0003DMG400035689,PGSC0003DMG400020519
GO:0051834	evasion or tolerance of defenses of other organism involved in symbiotic interaction	biological_process	0.059099	1	9	2387	55	29181	PGSC0003DMG400001099,PGSC0003DMG400023341,PGSC0003DMG400022860,PGSC0003DMG400006975,PGSC0003DMG402021193,PGSC0003DMG400020519,PGSC0003DMG400035689,PGSC0003DMG400008545,PGSC0003DMG400004735
GO:0052173	response to defenses of other organism involved in symbiotic interaction	biological_process	0.059099	1	9	2387	55	29181	PGSC0003DMG400035689,PGSC0003DMG400004735,PGSC0003DMG400008545,PGSC0003DMG400020519,PGSC0003DMG402021193,PGSC0003DMG400001099,PGSC0003DMG400023341,PGSC0003DMG400006975,PGSC0003DMG400022860
GO:0052200	response to host defenses	biological_process	0.059099	1	9	2387	55	29181	PGSC0003DMG400020519,PGSC0003DMG400008545,PGSC0003DMG400004735,PGSC0003DMG400035689,PGSC0003DMG400006975,PGSC0003DMG400022860,PGSC0003DMG400023341,PGSC0003DMG400001099,PGSC0003DMG402021193
GO:0075136	response to host	biological_process	0.059099	1	9	2387	55	29181	PGSC0003DMG400020519,PGSC0003DMG400035689,PGSC0003DMG400004735,PGSC0003DMG400008545,PGSC0003DMG400001099,PGSC0003DMG400022860,PGSC0003DMG400006975,PGSC0003DMG400023341,PGSC0003DMG402021193
GO:0004373	glycogen (starch) synthase activity	molecular_function	0.059203	1	2	2387	4	29181	Novel02306,PGSC0003DMG400001998
GO:0004715	non-membrane spanning protein tyrosine kinase activity	molecular_function	0.060451	1	4	2387	18	29181	PGSC0003DMG400030680,PGSC0003DMG400004995,PGSC0003DMG400021422,PGSC0003DMG400032129
GO:0009144	purine nucleoside triphosphate metabolic process	biological_process	0.060626	1	49	2387	464	29181	PGSC0003DMG400013106,PGSC0003DMG400010913,PGSC0003DMG400030714,PGSC0003DMG400007092,PGSC0003DMG400000367,PGSC0003DMG400005926,PGSC0003DMG400016820,PGSC0003DMG400024220,PGSC0003DMG400022893,PGSC0003DMG402019176,PGSC0003DMG400019734,PGSC0003DMG400013857,PGSC0003DMG400021607,PGSC0003DMG402027860,PGSC0003DMG400005256,PGSC0003DMG400029615,PGSC0003DMG400014217,PGSC0003DMG400025519,PGSC0003DMG400017655,…
GO:0009199	ribonucleoside triphosphate metabolic process	biological_process	0.060626	1	49	2387	464	29181	PGSC0003DMG400022825,PGSC0003DMG400010691,PGSC0003DMG401029267,PGSC0003DMG400027321,PGSC0003DMG400003906,PGSC0003DMG400022770,PGSC0003DMG400020740,PGSC0003DMG400003882,PGSC0003DMG400027925,Novel01389,PGSC0003DMG400015766,PGSC0003DMG400010007,Novel03007,PGSC0003DMG400022417,PGSC0003DMG400015392,PGSC0003DMG400020497,PGSC0003DMG400024701,PGSC0003DMG400032558,PGSC0003DMG400008065,PGSC0003DMG402026306…
GO:0009205	purine ribonucleoside triphosphate metabolic process	biological_process	0.060626	1	49	2387	464	29181	PGSC0003DMG401029267,PGSC0003DMG400027321,PGSC0003DMG400010691,PGSC0003DMG400022825,PGSC0003DMG400027925,Novel01389,PGSC0003DMG400022770,PGSC0003DMG400003906,PGSC0003DMG400003882,PGSC0003DMG400020740,PGSC0003DMG400010007,Novel03007,PGSC0003DMG400022417,PGSC0003DMG400015766,PGSC0003DMG400032558,PGSC0003DMG400020497,PGSC0003DMG400024701,PGSC0003DMG400015392,PGSC0003DMG400026643,PGSC0003DMG400024914…
GO:0023051	regulation of signaling	biological_process	0.060822	1	28	2387	238	29181	PGSC0003DMG400020089,PGSC0003DMG400032118,PGSC0003DMG400008259,PGSC0003DMG400012554,PGSC0003DMG400027204,Novel02306,PGSC0003DMG400007381,PGSC0003DMG400031007,PGSC0003DMG400028276,PGSC0003DMG401027561,PGSC0003DMG400016820,Novel03299,PGSC0003DMG400030322,PGSC0003DMG402023851,PGSC0003DMG400030663,Novel00308,PGSC0003DMG402002053,PGSC0003DMG400032187,PGSC0003DMG400000932,PGSC0003DMG401002542,PGSC0003D…
GO:0002097	tRNA wobble base modification	biological_process	0.061027	1	4	2387	17	29181	PGSC0003DMG400012408,PGSC0003DMG400001543,PGSC0003DMG400023319,PGSC0003DMG400011479
GO:0002098	tRNA wobble uridine modification	biological_process	0.061027	1	4	2387	17	29181	PGSC0003DMG400011479,PGSC0003DMG400012408,PGSC0003DMG400001543,PGSC0003DMG400023319
GO:0006873	cellular ion homeostasis	biological_process	0.061138	1	13	2387	106	29181	PGSC0003DMG400028497,PGSC0003DMG400026534,PGSC0003DMG400027119,PGSC0003DMG400009085,PGSC0003DMG400028320,PGSC0003DMG400005154,PGSC0003DMG400006327,PGSC0003DMG401029997,PGSC0003DMG400003632,PGSC0003DMG400024986,PGSC0003DMG400005638,PGSC0003DMG400006102,Novel01525
GO:0006875	cellular metal ion homeostasis	biological_process	0.061138	1	13	2387	106	29181	PGSC0003DMG400009085,PGSC0003DMG400028320,PGSC0003DMG400026534,PGSC0003DMG400028497,PGSC0003DMG400027119,Novel01525,PGSC0003DMG400005638,PGSC0003DMG400006102,PGSC0003DMG401029997,PGSC0003DMG400005154,PGSC0003DMG400006327,PGSC0003DMG400003632,PGSC0003DMG400024986
GO:0030003	cellular cation homeostasis	biological_process	0.061138	1	13	2387	106	29181	PGSC0003DMG400003632,PGSC0003DMG400024986,PGSC0003DMG400006327,PGSC0003DMG400005154,PGSC0003DMG401029997,PGSC0003DMG400006102,PGSC0003DMG400005638,Novel01525,PGSC0003DMG400027119,PGSC0003DMG400028497,PGSC0003DMG400026534,PGSC0003DMG400028320,PGSC0003DMG400009085
GO:0051537	2 iron, 2 sulfur cluster binding	molecular_function	0.061303	1	12	2387	85	29181	PGSC0003DMG400017570,PGSC0003DMG400012761,PGSC0003DMG400006285,PGSC0003DMG400000457,PGSC0003DMG400019574,PGSC0003DMG400009912,PGSC0003DMG400011772,Novel00367,PGSC0003DMG400017407,PGSC0003DMG400018246,PGSC0003DMG400035689,PGSC0003DMG400019888
GO:0003743	translation initiation factor activity	molecular_function	0.061348	1	18	2387	145	29181	PGSC0003DMG400019647,PGSC0003DMG400018811,PGSC0003DMG400022942,PGSC0003DMG400041027,PGSC0003DMG400022713,PGSC0003DMG400007016,PGSC0003DMG400022216,PGSC0003DMG400001628,PGSC0003DMG400001378,PGSC0003DMG400026534,PGSC0003DMG400033615,PGSC0003DMG400029694,PGSC0003DMG400027858,PGSC0003DMG400010478,PGSC0003DMG400016697,PGSC0003DMG400011645,PGSC0003DMG400025373,PGSC0003DMG400010664
GO:0010468	regulation of gene expression	biological_process	0.06198	1	352	2387	3811	29181	PGSC0003DMG400034289,Novel00207,PGSC0003DMG400031415,PGSC0003DMG400017334,PGSC0003DMG400031337,PGSC0003DMG402031196,PGSC0003DMG400030425,PGSC0003DMG400028826,PGSC0003DMG400022209,PGSC0003DMG400018693,PGSC0003DMG401020784,PGSC0003DMG400003503,PGSC0003DMG400027051,PGSC0003DMG400012305,PGSC0003DMG400000064,PGSC0003DMG400012795,PGSC0003DMG402008032,PGSC0003DMG400014302,PGSC0003DMG400001350,PGSC0003DM…
GO:0050789	regulation of biological process	biological_process	0.062152	1	594	2387	6643	29181	PGSC0003DMG400001434,PGSC0003DMG400032118,PGSC0003DMG402000479,PGSC0003DMG400010438,PGSC0003DMG400019824,PGSC0003DMG400026351,PGSC0003DMG400027594,PGSC0003DMG400008328,PGSC0003DMG400007408,PGSC0003DMG402019457,PGSC0003DMG400043599,PGSC0003DMG400019693,PGSC0003DMG400028304,PGSC0003DMG400020317,PGSC0003DMG400016892,PGSC0003DMG400005991,PGSC0003DMG402009663,PGSC0003DMG400006026,PGSC0003DMG400011207,…
GO:0015179	L-amino acid transmembrane transporter activity	molecular_function	0.062344	1	3	2387	11	29181	PGSC0003DMG400030519,PGSC0003DMG400010438,PGSC0003DMG400004061
GO:0006094	gluconeogenesis	biological_process	0.062965	1	7	2387	42	29181	PGSC0003DMG400010413,PGSC0003DMG400015392,PGSC0003DMG400015766,PGSC0003DMG400014944,PGSC0003DMG400008871,PGSC0003DMG400027925,PGSC0003DMG400024701
GO:0019319	hexose biosynthetic process	biological_process	0.062965	1	7	2387	42	29181	PGSC0003DMG400027925,PGSC0003DMG400024701,PGSC0003DMG400008871,PGSC0003DMG400015766,PGSC0003DMG400014944,PGSC0003DMG400010413,PGSC0003DMG400015392
GO:0046364	monosaccharide biosynthetic process	biological_process	0.062965	1	7	2387	42	29181	PGSC0003DMG400015766,PGSC0003DMG400014944,PGSC0003DMG400010413,PGSC0003DMG400015392,PGSC0003DMG400027925,PGSC0003DMG400024701,PGSC0003DMG400008871
GO:0006612	protein targeting to membrane	biological_process	0.066606	1	24	2387	188	29181	PGSC0003DMG401016933,Novel02118,PGSC0003DMG400031248,PGSC0003DMG400024365,PGSC0003DMG402029631,PGSC0003DMG402000927,PGSC0003DMG400008871,PGSC0003DMG400010619,PGSC0003DMG401029267,PGSC0003DMG400026493,PGSC0003DMG400020587,PGSC0003DMG400003647,PGSC0003DMG400018116,PGSC0003DMG402029267,PGSC0003DMG400007496,PGSC0003DMG400021177,PGSC0003DMG401015043,PGSC0003DMG400010127,PGSC0003DMG401003154,PGSC0003DM…
GO:0044767	single-organism developmental process	biological_process	0.067928	1	80	2387	786	29181	PGSC0003DMG400004704,PGSC0003DMG400003849,PGSC0003DMG400022885,PGSC0003DMG400002992,PGSC0003DMG400030663,PGSC0003DMG402023851,PGSC0003DMG400011801,PGSC0003DMG400000398,PGSC0003DMG400023012,PGSC0003DMG401018599,Novel00412,PGSC0003DMG400003581,Novel02312,PGSC0003DMG400026476,PGSC0003DMG400009584,PGSC0003DMG400022315,PGSC0003DMG401024930,PGSC0003DMG400028924,PGSC0003DMG400031248,PGSC0003DMG400016465…
GO:0005126	cytokine receptor binding	molecular_function	0.068475	1	18	2387	147	29181	PGSC0003DMG401002242,PGSC0003DMG400007062,PGSC0003DMG400012991,PGSC0003DMG400000695,PGSC0003DMG401023104,PGSC0003DMG400014316,PGSC0003DMG400005976,PGSC0003DMG400030843,PGSC0003DMG400003069,PGSC0003DMG401014575,PGSC0003DMG400000646,PGSC0003DMG400006835,PGSC0003DMG402021124,PGSC0003DMG400015742,PGSC0003DMG400011160,PGSC0003DMG400023478,PGSC0003DMG400020520,PGSC0003DMG400006185
GO:0009123	nucleoside monophosphate metabolic process	biological_process	0.068652	1	53	2387	511	29181	PGSC0003DMG400022417,Novel03007,PGSC0003DMG400010007,PGSC0003DMG400015766,PGSC0003DMG400032558,PGSC0003DMG400024701,PGSC0003DMG400020497,PGSC0003DMG400015392,PGSC0003DMG400027321,PGSC0003DMG401029267,PGSC0003DMG400010691,PGSC0003DMG400022825,Novel01389,PGSC0003DMG400027925,PGSC0003DMG400020740,PGSC0003DMG400003882,PGSC0003DMG400023636,PGSC0003DMG400003906,PGSC0003DMG400009847,PGSC0003DMG400022770…
GO:0034227	tRNA thio-modification	biological_process	0.069031	1	5	2387	25	29181	PGSC0003DMG400007010,PGSC0003DMG400011479,PGSC0003DMG400001543,PGSC0003DMG400012408,PGSC0003DMG400023319
GO:0065007	biological regulation	biological_process	0.069075	1	628	2387	7046	29181	PGSC0003DMG400001714,PGSC0003DMG400011479,PGSC0003DMG400031465,PGSC0003DMG400018461,PGSC0003DMG400012437,PGSC0003DMG400015447,PGSC0003DMG400025372,PGSC0003DMG400016512,PGSC0003DMG400000602,PGSC0003DMG400016852,PGSC0003DMG400011216,PGSC0003DMG400000457,PGSC0003DMG400025259,PGSC0003DMG400036779,PGSC0003DMG402016772,PGSC0003DMG400000932,PGSC0003DMG400017654,PGSC0003DMG400032187,PGSC0003DMG400030663,…
GO:0005173	stem cell factor receptor binding	molecular_function	0.070387	1	4	2387	17	29181	PGSC0003DMG400006835,PGSC0003DMG400030843,PGSC0003DMG400011160,PGSC0003DMG400003069
GO:0004383	guanylate cyclase activity	molecular_function	0.070426	1	2	2387	5	29181	PGSC0003DMG402020303,PGSC0003DMG400031029
GO:0006182	cGMP biosynthetic process	biological_process	0.070426	1	2	2387	5	29181	PGSC0003DMG400031029,PGSC0003DMG402020303
GO:0046068	cGMP metabolic process	biological_process	0.070426	1	2	2387	5	29181	PGSC0003DMG402020303,PGSC0003DMG400031029
GO:0016158	3-phytase activity	molecular_function	0.070434	1	2	2387	5	29181	PGSC0003DMG400022061,PGSC0003DMG400000133
GO:0004820	glycine-tRNA ligase activity	molecular_function	0.07098	1	2	2387	6	29181	Novel00317,PGSC0003DMG402005133
GO:0006426	glycyl-tRNA aminoacylation	biological_process	0.07098	1	2	2387	6	29181	PGSC0003DMG402005133,Novel00317
GO:0032865	ERMES complex	cellular_component	0.07137	1	2	2387	6	29181	Novel02758,PGSC0003DMG400030425
GO:0044232	organelle membrane contact site	cellular_component	0.07137	1	2	2387	6	29181	PGSC0003DMG400030425,Novel02758
GO:0044233	ER-mitochondrion membrane contact site	cellular_component	0.07137	1	2	2387	6	29181	Novel02758,PGSC0003DMG400030425
GO:0010340	carboxyl-O-methyltransferase activity	molecular_function	0.071652	1	9	2387	57	29181	PGSC0003DMG401026272,PGSC0003DMG400023836,PGSC0003DMG400015226,Novel03182,PGSC0003DMG400003614,PGSC0003DMG400010119,PGSC0003DMG400002773,PGSC0003DMG400000343,PGSC0003DMG401003285
GO:0051998	protein carboxyl O-methyltransferase activity	molecular_function	0.071652	1	9	2387	57	29181	PGSC0003DMG400002773,PGSC0003DMG400003614,PGSC0003DMG400010119,Novel03182,PGSC0003DMG401003285,PGSC0003DMG400000343,PGSC0003DMG401026272,PGSC0003DMG400015226,PGSC0003DMG400023836
GO:1902531	regulation of intracellular signal transduction	biological_process	0.071873	1	12	2387	85	29181	PGSC0003DMG401027561,PGSC0003DMG400019203,PGSC0003DMG400030663,Novel00308,Novel03299,Novel02038,PGSC0003DMG400016820,PGSC0003DMG400031007,PGSC0003DMG400000399,PGSC0003DMG400012554,PGSC0003DMG400027204,PGSC0003DMG400000932
GO:0043412	macromolecule modification	biological_process	0.072217	1	310	2387	3105	29181	PGSC0003DMG400017691,PGSC0003DMG400028560,PGSC0003DMG400009303,PGSC0003DMG400023836,PGSC0003DMG400029735,PGSC0003DMG400005484,PGSC0003DMG400004035,PGSC0003DMG400010710,PGSC0003DMG400006989,PGSC0003DMG400012635,Novel03182,PGSC0003DMG400008108,PGSC0003DMG400005040,PGSC0003DMG400011005,PGSC0003DMG400013697,Novel00755,PGSC0003DMG400003564,PGSC0003DMG400031310,PGSC0003DMG400010478,PGSC0003DMG400030680…
GO:0006807	nitrogen compound metabolic process	biological_process	0.072243	1	874	2387	9955	29181	PGSC0003DMG400027155,PGSC0003DMG400029792,PGSC0003DMG401027256,PGSC0003DMG401000287,PGSC0003DMG400027131,PGSC0003DMG400015849,PGSC0003DMG400026577,Novel00051,PGSC0003DMG400024248,Novel00935,PGSC0003DMG400024926,PGSC0003DMG400016465,PGSC0003DMG400027323,PGSC0003DMG400024886,PGSC0003DMG401012197,PGSC0003DMG400004415,Novel02803,PGSC0003DMG400030519,PGSC0003DMG400025700,PGSC0003DMG400020422,PGSC0003D…
GO:0047750	cholestenol delta-isomerase activity	molecular_function	0.072302	1	3	2387	11	29181	PGSC0003DMG400003564,PGSC0003DMG400007379,PGSC0003DMG400003411
GO:0016163	nitrogenase activity	molecular_function	0.072497	1	3	2387	12	29181	PGSC0003DMG400012696,PGSC0003DMG400040510,PGSC0003DMG400003821
GO:0016732	oxidoreductase activity, acting on iron-sulfur proteins as donors, dinitrogen as acceptor	molecular_function	0.072497	1	3	2387	12	29181	PGSC0003DMG400003821,PGSC0003DMG400040510,PGSC0003DMG400012696
GO:0002949	tRNA threonylcarbamoyladenosine modification	biological_process	0.07271	1	20	2387	142	29181	PGSC0003DMG400008801,Novel02174,PGSC0003DMG402029631,PGSC0003DMG400009699,Novel02713,PGSC0003DMG400026493,PGSC0003DMG400003647,PGSC0003DMG400022027,PGSC0003DMG400020086,PGSC0003DMG400015506,PGSC0003DMG400006034,PGSC0003DMG401029267,PGSC0003DMG402016772,PGSC0003DMG402031196,PGSC0003DMG400008871,PGSC0003DMG400002980,PGSC0003DMG401003154,PGSC0003DMG400007496,Novel01267,PGSC0003DMG400009303
GO:0070525	tRNA threonylcarbamoyladenosine metabolic process	biological_process	0.07271	1	20	2387	142	29181	PGSC0003DMG400022027,PGSC0003DMG400020086,PGSC0003DMG400026493,Novel02713,PGSC0003DMG400003647,PGSC0003DMG402031196,PGSC0003DMG400008871,PGSC0003DMG400002980,PGSC0003DMG400015506,PGSC0003DMG400006034,PGSC0003DMG401029267,PGSC0003DMG402016772,PGSC0003DMG400008801,Novel02174,PGSC0003DMG400009699,PGSC0003DMG402029631,Novel01267,PGSC0003DMG400009303,PGSC0003DMG401003154,PGSC0003DMG400007496
GO:0030258	lipid modification	biological_process	0.072819	1	16	2387	117	29181	PGSC0003DMG400010337,PGSC0003DMG400022917,PGSC0003DMG400015817,PGSC0003DMG400020895,PGSC0003DMG400020620,PGSC0003DMG400032118,PGSC0003DMG400015579,PGSC0003DMG402010355,PGSC0003DMG400024534,PGSC0003DMG400031130,PGSC0003DMG400033584,PGSC0003DMG400015601,PGSC0003DMG400020640,PGSC0003DMG400027002,PGSC0003DMG400027192,Novel02757
GO:0009312	oligosaccharide biosynthetic process	biological_process	0.072983	1	17	2387	131	29181	PGSC0003DMG401017546,PGSC0003DMG400010556,PGSC0003DMG400005828,PGSC0003DMG400002773,PGSC0003DMG400002021,PGSC0003DMG400020619,PGSC0003DMG400030849,PGSC0003DMG400021341,PGSC0003DMG400020785,PGSC0003DMG400013809,PGSC0003DMG400027449,PGSC0003DMG400009279,PGSC0003DMG400013857,PGSC0003DMG400033932,PGSC0003DMG400006829,PGSC0003DMG400003614,Novel03182
GO:0006613	cotranslational protein targeting to membrane	biological_process	0.073037	1	23	2387	180	29181	PGSC0003DMG401003154,PGSC0003DMG402029267,PGSC0003DMG400018116,PGSC0003DMG401015043,PGSC0003DMG400010127,PGSC0003DMG400007496,PGSC0003DMG400021177,PGSC0003DMG400021343,Novel01267,PGSC0003DMG400010007,PGSC0003DMG400024126,PGSC0003DMG400031248,PGSC0003DMG400024365,PGSC0003DMG401016933,Novel02118,PGSC0003DMG402029631,PGSC0003DMG402000927,PGSC0003DMG400020587,PGSC0003DMG400003647,PGSC0003DMG400026493…
GO:0004398	histidine decarboxylase activity	molecular_function	0.073376	1	1	2387	1	29181	PGSC0003DMG400002781
GO:0005337	nucleoside transmembrane transporter activity	molecular_function	0.073546	1	6	2387	38	29181	PGSC0003DMG400001391,PGSC0003DMG400011089,PGSC0003DMG400005612,PGSC0003DMG400021255,PGSC0003DMG400003111,PGSC0003DMG400024357
GO:0009584	detection of visible light	biological_process	0.073931	1	4	2387	17	29181	PGSC0003DMG400041458,PGSC0003DMG400003072,PGSC0003DMG400015766,Novel01891
GO:0005247	voltage-gated chloride channel activity	molecular_function	0.074784	1	5	2387	25	29181	PGSC0003DMG400020215,PGSC0003DMG400011330,PGSC0003DMG400006975,PGSC0003DMG400022186,PGSC0003DMG400021862
GO:0005254	chloride channel activity	molecular_function	0.074784	1	5	2387	25	29181	PGSC0003DMG400022186,PGSC0003DMG400021862,PGSC0003DMG400006975,PGSC0003DMG400020215,PGSC0003DMG400011330
GO:0008308	voltage-gated anion channel activity	molecular_function	0.074784	1	5	2387	25	29181	PGSC0003DMG400021862,PGSC0003DMG400022186,PGSC0003DMG400006975,PGSC0003DMG400020215,PGSC0003DMG400011330
GO:0015108	chloride transmembrane transporter activity	molecular_function	0.074784	1	5	2387	25	29181	PGSC0003DMG400011330,PGSC0003DMG400020215,PGSC0003DMG400021862,PGSC0003DMG400022186,PGSC0003DMG400006975
GO:0050794	regulation of cellular process	biological_process	0.075134	1	565	2387	6325	29181	Novel03379,PGSC0003DMG400019513,PGSC0003DMG400029725,PGSC0003DMG401006188,PGSC0003DMG400021422,PGSC0003DMG400008734,PGSC0003DMG400013949,PGSC0003DMG400031310,PGSC0003DMG400015608,PGSC0003DMG401008903,PGSC0003DMG400041451,PGSC0003DMG400017440,PGSC0003DMG400036536,PGSC0003DMG400001343,PGSC0003DMG400019615,PGSC0003DMG400014914,PGSC0003DMG400023636,PGSC0003DMG400013402,PGSC0003DMG400016608,PGSC0003DM…
GO:0016780	phosphotransferase activity, for other substituted phosphate groups	molecular_function	0.075178	1	5	2387	28	29181	PGSC0003DMG400010520,PGSC0003DMG402021159,PGSC0003DMG400032550,PGSC0003DMG400009960,PGSC0003DMG400019524
GO:0007093	mitotic cell cycle checkpoint	biological_process	0.075618	1	7	2387	44	29181	PGSC0003DMG400017570,PGSC0003DMG402013013,PGSC0003DMG400022209,PGSC0003DMG400008931,PGSC0003DMG400019455,PGSC0003DMG400023478,PGSC0003DMG400022061
GO:0008033	tRNA processing	biological_process	0.075991	1	65	2387	623	29181	PGSC0003DMG400028812,PGSC0003DMG400008801,PGSC0003DMG400012408,PGSC0003DMG402029631,PGSC0003DMG400026493,Novel02713,PGSC0003DMG400008871,PGSC0003DMG400001766,PGSC0003DMG402016772,PGSC0003DMG400015506,PGSC0003DMG400003614,PGSC0003DMG401003154,PGSC0003DMG400024266,PGSC0003DMG402008019,PGSC0003DMG400011479,PGSC0003DMG400006483,Novel01267,Novel02174,PGSC0003DMG400003880,PGSC0003DMG401020090,PGSC0003D…
GO:0005186	pheromone activity	molecular_function	0.076234	1	10	2387	69	29181	PGSC0003DMG400007030,PGSC0003DMG400025797,PGSC0003DMG400002773,PGSC0003DMG400018369,PGSC0003DMG400027889,PGSC0003DMG400027854,PGSC0003DMG400025844,PGSC0003DMG400027791,PGSC0003DMG400031765,PGSC0003DMG402000479
GO:0004045	aminoacyl-tRNA hydrolase activity	molecular_function	0.077055	1	3	2387	13	29181	PGSC0003DMG400024986,PGSC0003DMG400002231,PGSC0003DMG400023799
GO:0015833	peptide transport	biological_process	0.077392	1	5	2387	27	29181	PGSC0003DMG400028989,PGSC0003DMG400011414,PGSC0003DMG400009821,PGSC0003DMG400023710,PGSC0003DMG400025515
GO:0044282	small molecule catabolic process	biological_process	0.077893	1	16	2387	118	29181	PGSC0003DMG400027192,PGSC0003DMG400027002,Novel00393,PGSC0003DMG400001998,PGSC0003DMG401002654,PGSC0003DMG400015330,PGSC0003DMG400005361,PGSC0003DMG400020541,PGSC0003DMG400023881,PGSC0003DMG400010334,PGSC0003DMG400020620,PGSC0003DMG400003747,PGSC0003DMG401000287,PGSC0003DMG400001246,PGSC0003DMG400017724,PGSC0003DMG402000914
GO:0042470	melanosome	cellular_component	0.078359	1	5	2387	27	29181	PGSC0003DMG400008728,PGSC0003DMG402028565,PGSC0003DMG400029712,PGSC0003DMG400032563,PGSC0003DMG401009389
GO:0048770	pigment granule	cellular_component	0.078359	1	5	2387	27	29181	PGSC0003DMG400032563,PGSC0003DMG401009389,PGSC0003DMG400029712,PGSC0003DMG400008728,PGSC0003DMG402028565
GO:0006766	vitamin metabolic process	biological_process	0.078595	1	23	2387	198	29181	PGSC0003DMG400003540,PGSC0003DMG400032110,PGSC0003DMG401000287,PGSC0003DMG400000112,PGSC0003DMG402004423,PGSC0003DMG400022418,PGSC0003DMG400009122,PGSC0003DMG400007012,PGSC0003DMG400032104,PGSC0003DMG400019717,PGSC0003DMG400027323,PGSC0003DMG400024336,PGSC0003DMG400003882,PGSC0003DMG400023636,PGSC0003DMG400026534,PGSC0003DMG400026577,PGSC0003DMG402003505,PGSC0003DMG400025194,PGSC0003DMG400029879,…
GO:0006767	water-soluble vitamin metabolic process	biological_process	0.078595	1	23	2387	198	29181	PGSC0003DMG400006483,PGSC0003DMG400007496,PGSC0003DMG400010413,PGSC0003DMG402003505,PGSC0003DMG401023772,PGSC0003DMG400029879,PGSC0003DMG400025194,PGSC0003DMG400027323,PGSC0003DMG400019717,PGSC0003DMG400032104,PGSC0003DMG400007012,PGSC0003DMG400009122,PGSC0003DMG400026577,PGSC0003DMG400023636,PGSC0003DMG400003882,PGSC0003DMG400024336,PGSC0003DMG400026534,PGSC0003DMG400003540,PGSC0003DMG400032110,…
GO:0031514	motile cilium	cellular_component	0.079503	1	12	2387	93	29181	Novel02285,PGSC0003DMG400004995,PGSC0003DMG400017570,PGSC0003DMG401020784,PGSC0003DMG400021282,PGSC0003DMG400028520,PGSC0003DMG400019455,PGSC0003DMG400019824,PGSC0003DMG400001417,PGSC0003DMG400000498,PGSC0003DMG400027534,PGSC0003DMG400012711
GO:0055114	oxidation-reduction process	biological_process	0.081315	1	331	2387	3591	29181	PGSC0003DMG400018080,PGSC0003DMG400018199,PGSC0003DMG400007016,PGSC0003DMG400024609,PGSC0003DMG400015242,PGSC0003DMG400004844,PGSC0003DMG400030843,PGSC0003DMG400001117,PGSC0003DMG400027002,PGSC0003DMG400014273,PGSC0003DMG400040510,PGSC0003DMG400003634,PGSC0003DMG400005926,PGSC0003DMG400024914,PGSC0003DMG400022418,PGSC0003DMG400013550,PGSC0003DMG400006854,PGSC0003DMG400001070,Novel00631,PGSC0003DM…
GO:0005137	interleukin-5 receptor binding	molecular_function	0.081391	1	3	2387	14	29181	PGSC0003DMG401002242,PGSC0003DMG400000646,PGSC0003DMG401023104
GO:0004415	hyalurononglucosaminidase activity	molecular_function	0.082103	1	3	2387	15	29181	PGSC0003DMG400005301,PGSC0003DMG400012228,PGSC0003DMG400014914
GO:0015929	hexosaminidase activity	molecular_function	0.082103	1	3	2387	15	29181	PGSC0003DMG400014914,PGSC0003DMG400012228,PGSC0003DMG400005301
GO:0008897	holo-[acyl-carrier-protein] synthase activity	molecular_function	0.083408	1	2	2387	6	29181	PGSC0003DMG400019524,PGSC0003DMG400010520
GO:0009416	response to light stimulus	biological_process	0.084911	1	8	2387	50	29181	PGSC0003DMG400015766,PGSC0003DMG400025519,PGSC0003DMG400041458,PGSC0003DMG400003072,PGSC0003DMG400025752,Novel01891,PGSC0003DMG400027594,PGSC0003DMG400021789
GO:0007283	spermatogenesis	biological_process	0.085333	1	11	2387	80	29181	PGSC0003DMG400010413,PGSC0003DMG400016544,PGSC0003DMG400030478,PGSC0003DMG400033031,PGSC0003DMG400000836,PGSC0003DMG400013550,PGSC0003DMG400002231,PGSC0003DMG400021629,PGSC0003DMG400029546,PGSC0003DMG401013540,PGSC0003DMG400014873
GO:0048232	male gamete generation	biological_process	0.085333	1	11	2387	80	29181	PGSC0003DMG400000836,PGSC0003DMG400033031,PGSC0003DMG400010413,PGSC0003DMG400016544,PGSC0003DMG400030478,PGSC0003DMG400029546,PGSC0003DMG401013540,PGSC0003DMG400014873,PGSC0003DMG400002231,PGSC0003DMG400013550,PGSC0003DMG400021629
GO:0015698	inorganic anion transport	biological_process	0.086421	1	18	2387	136	29181	PGSC0003DMG400020215,PGSC0003DMG400011330,PGSC0003DMG400012239,PGSC0003DMG400020136,PGSC0003DMG402028252,PGSC0003DMG400000351,PGSC0003DMG400021862,PGSC0003DMG400006975,PGSC0003DMG400011000,PGSC0003DMG400015470,PGSC0003DMG400015447,PGSC0003DMG400007683,PGSC0003DMG400008660,Novel02265,PGSC0003DMG401002977,PGSC0003DMG400009994,PGSC0003DMG400022186,PGSC0003DMG402002977
GO:0006874	cellular calcium ion homeostasis	biological_process	0.08692	1	9	2387	73	29181	PGSC0003DMG400005638,Novel01525,PGSC0003DMG400006327,PGSC0003DMG400005154,PGSC0003DMG401029997,PGSC0003DMG400003632,PGSC0003DMG400009085,PGSC0003DMG400028497,PGSC0003DMG400026534
GO:0055074	calcium ion homeostasis	biological_process	0.08692	1	9	2387	73	29181	PGSC0003DMG400028497,PGSC0003DMG400026534,PGSC0003DMG400009085,PGSC0003DMG400003632,PGSC0003DMG400005154,PGSC0003DMG400006327,PGSC0003DMG401029997,PGSC0003DMG400005638,Novel01525
GO:0072503	cellular divalent inorganic cation homeostasis	biological_process	0.08692	1	9	2387	73	29181	PGSC0003DMG401029997,PGSC0003DMG400006327,PGSC0003DMG400005154,PGSC0003DMG400003632,Novel01525,PGSC0003DMG400005638,PGSC0003DMG400026534,PGSC0003DMG400028497,PGSC0003DMG400009085
GO:0072507	divalent inorganic cation homeostasis	biological_process	0.08692	1	9	2387	73	29181	PGSC0003DMG401029997,PGSC0003DMG400005154,PGSC0003DMG400006327,PGSC0003DMG400003632,Novel01525,PGSC0003DMG400005638,PGSC0003DMG400026534,PGSC0003DMG400028497,PGSC0003DMG400009085
GO:0009251	glucan catabolic process	biological_process	0.08728	1	3	2387	14	29181	PGSC0003DMG400030684,PGSC0003DMG400019332,PGSC0003DMG400010897
GO:0030245	cellulose catabolic process	biological_process	0.08728	1	3	2387	14	29181	PGSC0003DMG400019332,PGSC0003DMG400030684,PGSC0003DMG400010897
GO:0044247	cellular polysaccharide catabolic process	biological_process	0.08728	1	3	2387	14	29181	PGSC0003DMG400019332,PGSC0003DMG400030684,PGSC0003DMG400010897
GO:0051275	beta-glucan catabolic process	biological_process	0.08728	1	3	2387	14	29181	PGSC0003DMG400010897,PGSC0003DMG400019332,PGSC0003DMG400030684
GO:0014065	phosphatidylinositol 3-kinase signaling	biological_process	0.087476	1	3	2387	12	29181	PGSC0003DMG400000399,Novel00308,PGSC0003DMG400027204
GO:0014066	regulation of phosphatidylinositol 3-kinase signaling	biological_process	0.087476	1	3	2387	12	29181	PGSC0003DMG400027204,Novel00308,PGSC0003DMG400000399
GO:0014068	positive regulation of phosphatidylinositol 3-kinase signaling	biological_process	0.087476	1	3	2387	12	29181	PGSC0003DMG400027204,Novel00308,PGSC0003DMG400000399
GO:0043548	phosphatidylinositol 3-kinase binding	molecular_function	0.087476	1	3	2387	12	29181	PGSC0003DMG400027204,Novel00308,PGSC0003DMG400000399
GO:0048015	phosphatidylinositol-mediated signaling	biological_process	0.087476	1	3	2387	12	29181	Novel00308,PGSC0003DMG400027204,PGSC0003DMG400000399
GO:0048017	inositol lipid-mediated signaling	biological_process	0.087476	1	3	2387	12	29181	PGSC0003DMG400027204,Novel00308,PGSC0003DMG400000399
GO:1990234	transferase complex	cellular_component	0.087571	1	77	2387	786	29181	PGSC0003DMG400031248,PGSC0003DMG400032104,PGSC0003DMG400011399,PGSC0003DMG400021684,PGSC0003DMG400003647,PGSC0003DMG400002153,PGSC0003DMG400010119,PGSC0003DMG400000070,PGSC0003DMG400017312,Novel01818,PGSC0003DMG400005301,PGSC0003DMG400000462,Novel02312,PGSC0003DMG402016574,PGSC0003DMG400022347,PGSC0003DMG400005823,PGSC0003DMG400030246,PGSC0003DMG400018432,PGSC0003DMG400030617,PGSC0003DMG400018182…
GO:0006432	phenylalanyl-tRNA aminoacylation	biological_process	0.08766	1	6	2387	35	29181	PGSC0003DMG400023334,Novel02246,PGSC0003DMG400011521,PGSC0003DMG400001398,PGSC0003DMG400014694,PGSC0003DMG402007138
GO:0019902	phosphatase binding	molecular_function	0.087899	1	2	2387	6	29181	PGSC0003DMG400007030,PGSC0003DMG401007235
GO:0034593	phosphatidylinositol bisphosphate phosphatase activity	molecular_function	0.088054	1	2	2387	5	29181	PGSC0003DMG400031130,PGSC0003DMG400032118
GO:0034596	phosphatidylinositol phosphate 4-phosphatase activity	molecular_function	0.088054	1	2	2387	5	29181	PGSC0003DMG400031130,PGSC0003DMG400032118
GO:0034597	phosphatidylinositol-4,5-bisphosphate 4-phosphatase activity	molecular_function	0.088054	1	2	2387	5	29181	PGSC0003DMG400032118,PGSC0003DMG400031130
GO:0046839	phospholipid dephosphorylation	biological_process	0.088054	1	2	2387	5	29181	PGSC0003DMG400031130,PGSC0003DMG400032118
GO:0046856	phosphatidylinositol dephosphorylation	biological_process	0.088054	1	2	2387	5	29181	PGSC0003DMG400032118,PGSC0003DMG400031130
GO:0052866	phosphatidylinositol phosphate phosphatase activity	molecular_function	0.088054	1	2	2387	5	29181	PGSC0003DMG400032118,PGSC0003DMG400031130
GO:0000159	protein phosphatase type 2A complex	cellular_component	0.089516	1	4	2387	17	29181	PGSC0003DMG400017455,PGSC0003DMG400000695,PGSC0003DMG401027561,Novel03408
GO:0008601	protein phosphatase type 2A regulator activity	molecular_function	0.089516	1	4	2387	17	29181	Novel03408,PGSC0003DMG401027561,PGSC0003DMG400000695,PGSC0003DMG400017455
GO:0017006	protein-tetrapyrrole linkage	biological_process	0.089594	1	3	2387	13	29181	PGSC0003DMG400023913,PGSC0003DMG400009816,PGSC0003DMG400029132
GO:0034618	arginine binding	molecular_function	0.089898	1	2	2387	6	29181	PGSC0003DMG400027654,PGSC0003DMG400019514
GO:0046148	pigment biosynthetic process	biological_process	0.089928	1	23	2387	190	29181	PGSC0003DMG400004020,PGSC0003DMG400014873,PGSC0003DMG400045083,PGSC0003DMG400020422,PGSC0003DMG400014782,PGSC0003DMG400029626,PGSC0003DMG400004844,PGSC0003DMG400001117,PGSC0003DMG400019257,PGSC0003DMG400023754,PGSC0003DMG402004821,PGSC0003DMG400018437,PGSC0003DMG402028252,PGSC0003DMG400006822,PGSC0003DMG400017572,PGSC0003DMG400006854,PGSC0003DMG400013638,PGSC0003DMG400004168,PGSC0003DMG400007169,…
GO:0000049	tRNA binding	molecular_function	0.090147	1	8	2387	51	29181	PGSC0003DMG402005133,Novel02246,PGSC0003DMG400013857,PGSC0003DMG402019176,PGSC0003DMG400023319,PGSC0003DMG400011521,PGSC0003DMG400032166,PGSC0003DMG400023334
GO:0072521	purine-containing compound metabolic process	biological_process	0.090355	1	60	2387	593	29181	PGSC0003DMG400007760,PGSC0003DMG402026306,PGSC0003DMG400013550,PGSC0003DMG401027166,PGSC0003DMG400035389,PGSC0003DMG400008065,PGSC0003DMG400024914,PGSC0003DMG400026643,PGSC0003DMG400020484,PGSC0003DMG400009353,PGSC0003DMG400031029,PGSC0003DMG400017116,PGSC0003DMG400027693,PGSC0003DMG400014944,PGSC0003DMG400007169,PGSC0003DMG400024886,PGSC0003DMG400017655,PGSC0003DMG400028924,PGSC0003DMG400021607,…
GO:0030111	regulation of Wnt signaling pathway	biological_process	0.09049	1	5	2387	29	29181	PGSC0003DMG400020089,PGSC0003DMG400032118,PGSC0003DMG402002053,PGSC0003DMG402023851,PGSC0003DMG400008259
GO:0019748	secondary metabolic process	biological_process	0.090562	1	16	2387	130	29181	PGSC0003DMG400028752,PGSC0003DMG401019239,PGSC0003DMG400023886,PGSC0003DMG400003073,PGSC0003DMG400001464,PGSC0003DMG400003381,PGSC0003DMG400000209,PGSC0003DMG401028577,PGSC0003DMG400029473,PGSC0003DMG401013333,PGSC0003DMG400021804,PGSC0003DMG400025861,PGSC0003DMG400024109,Novel01143,PGSC0003DMG400021177,PGSC0003DMG400000881
GO:0043168	anion binding	molecular_function	0.090925	1	506	2387	5190	29181	Novel02118,PGSC0003DMG402029631,PGSC0003DMG403026842,PGSC0003DMG400028812,PGSC0003DMG400008801,PGSC0003DMG400004542,PGSC0003DMG400017625,PGSC0003DMG400014875,PGSC0003DMG400027654,PGSC0003DMG400004071,PGSC0003DMG400022711,PGSC0003DMG400001990,PGSC0003DMG400014811,PGSC0003DMG400011264,PGSC0003DMG400006483,PGSC0003DMG402002262,PGSC0003DMG400018811,PGSC0003DMG402002977,PGSC0003DMG400032129,PGSC0003DM…
GO:0017134	fibroblast growth factor binding	molecular_function	0.091685	1	2	2387	6	29181	PGSC0003DMG400001391,PGSC0003DMG401002548
GO:0032266	phosphatidylinositol-3-phosphate binding	molecular_function	0.092062	1	2	2387	6	29181	PGSC0003DMG400023012,PGSC0003DMG402032565
GO:0045861	negative regulation of proteolysis	biological_process	0.092324	1	9	2387	63	29181	PGSC0003DMG400019574,PGSC0003DMG400022209,PGSC0003DMG400018107,PGSC0003DMG402013013,PGSC0003DMG400008931,PGSC0003DMG400022061,PGSC0003DMG400023478,PGSC0003DMG400010438,PGSC0003DMG400019455
GO:0019054	modulation by virus of host process	biological_process	0.092359	1	8	2387	54	29181	PGSC0003DMG400029308,PGSC0003DMG400032198,PGSC0003DMG400022345,PGSC0003DMG400012412,PGSC0003DMG400014263,Novel03212,PGSC0003DMG400027521,PGSC0003DMG402003118
GO:0044068	modulation by symbiont of host cellular process	biological_process	0.092359	1	8	2387	54	29181	PGSC0003DMG400014263,Novel03212,PGSC0003DMG400027521,PGSC0003DMG402003118,PGSC0003DMG400022345,PGSC0003DMG400012412,PGSC0003DMG400029308,PGSC0003DMG400032198
GO:0005217	intracellular ligand-gated ion channel activity	molecular_function	0.092539	1	8	2387	64	29181	PGSC0003DMG400009085,PGSC0003DMG400026534,Novel01525,PGSC0003DMG400005638,PGSC0003DMG400003632,PGSC0003DMG401029997,PGSC0003DMG400005154,PGSC0003DMG400006327
GO:0005218	intracellular ligand-gated calcium channel activity	molecular_function	0.092539	1	8	2387	64	29181	PGSC0003DMG400009085,PGSC0003DMG400026534,PGSC0003DMG400005638,Novel01525,PGSC0003DMG400006327,PGSC0003DMG400005154,PGSC0003DMG401029997,PGSC0003DMG400003632
GO:0005219	ryanodine-sensitive calcium-release channel activity	molecular_function	0.092539	1	8	2387	64	29181	PGSC0003DMG400009085,PGSC0003DMG400026534,Novel01525,PGSC0003DMG400005638,PGSC0003DMG400003632,PGSC0003DMG401029997,PGSC0003DMG400006327,PGSC0003DMG400005154
GO:0015278	calcium-release channel activity	molecular_function	0.092539	1	8	2387	64	29181	PGSC0003DMG400003632,PGSC0003DMG401029997,PGSC0003DMG400006327,PGSC0003DMG400005154,Novel01525,PGSC0003DMG400005638,PGSC0003DMG400026534,PGSC0003DMG400009085
GO:0006551	leucine metabolic process	biological_process	0.092694	1	4	2387	18	29181	PGSC0003DMG400022770,PGSC0003DMG400006829,PGSC0003DMG400018939,PGSC0003DMG400024915
GO:0009098	leucine biosynthetic process	biological_process	0.092694	1	4	2387	18	29181	PGSC0003DMG400022770,PGSC0003DMG400006829,PGSC0003DMG400018939,PGSC0003DMG400024915
GO:0043624	cellular protein complex disassembly	biological_process	0.093471	1	10	2387	75	29181	PGSC0003DMG400015194,PGSC0003DMG400011222,PGSC0003DMG400031271,PGSC0003DMG402005733,PGSC0003DMG400008719,Novel01234,PGSC0003DMG400003882,PGSC0003DMG400028158,PGSC0003DMG400023478,PGSC0003DMG400030519
GO:0055082	cellular chemical homeostasis	biological_process	0.093499	1	13	2387	113	29181	PGSC0003DMG400009085,PGSC0003DMG400028320,PGSC0003DMG400028497,PGSC0003DMG400026534,PGSC0003DMG400027119,PGSC0003DMG400005638,PGSC0003DMG400006102,Novel01525,PGSC0003DMG400005154,PGSC0003DMG400006327,PGSC0003DMG401029997,PGSC0003DMG400024986,PGSC0003DMG400003632
GO:0044599	AP-5 adaptor complex	cellular_component	0.093543	1	3	2387	11	29181	PGSC0003DMG402014396,PGSC0003DMG400002980,PGSC0003DMG400017666
GO:0045930	negative regulation of mitotic cell cycle	biological_process	0.093657	1	7	2387	47	29181	PGSC0003DMG400017570,PGSC0003DMG402013013,PGSC0003DMG400008931,PGSC0003DMG400022209,PGSC0003DMG400019455,PGSC0003DMG400023478,PGSC0003DMG400022061
GO:0004096	catalase activity	molecular_function	0.094181	1	2	2387	5	29181	PGSC0003DMG400009906,PGSC0003DMG400029408
GO:0044267	cellular protein metabolic process	biological_process	0.094815	1	430	2387	4602	29181	PGSC0003DMG400026493,PGSC0003DMG400003035,PGSC0003DMG400019455,PGSC0003DMG400021359,PGSC0003DMG400022210,PGSC0003DMG400034531,PGSC0003DMG400047204,PGSC0003DMG400008871,PGSC0003DMG402020115,PGSC0003DMG400000872,PGSC0003DMG400025126,PGSC0003DMG402005482,PGSC0003DMG400004750,PGSC0003DMG400017570,PGSC0003DMG400029364,PGSC0003DMG401018530,PGSC0003DMG400003522,PGSC0003DMG400009914,PGSC0003DMG400006185,…
GO:0004807	triose-phosphate isomerase activity	molecular_function	0.094868	1	2	2387	6	29181	Novel02763,PGSC0003DMG400004436
GO:0009007	site-specific DNA-methyltransferase (adenine-specific) activity	molecular_function	0.095036	1	3	2387	12	29181	PGSC0003DMG400017691,PGSC0003DMG400013424,PGSC0003DMG402002262
GO:0009008	DNA-methyltransferase activity	molecular_function	0.095036	1	3	2387	12	29181	PGSC0003DMG402002262,PGSC0003DMG400013424,PGSC0003DMG400017691
GO:0032775	DNA methylation on adenine	biological_process	0.095036	1	3	2387	12	29181	PGSC0003DMG400017691,PGSC0003DMG400013424,PGSC0003DMG402002262
GO:0055065	metal ion homeostasis	biological_process	0.095285	1	13	2387	114	29181	PGSC0003DMG400009085,PGSC0003DMG400028320,PGSC0003DMG400028497,PGSC0003DMG400026534,PGSC0003DMG400027119,PGSC0003DMG400006102,PGSC0003DMG400005638,Novel01525,PGSC0003DMG400006327,PGSC0003DMG400005154,PGSC0003DMG401029997,PGSC0003DMG400024986,PGSC0003DMG400003632
GO:0018298	protein-chromophore linkage	biological_process	0.095499	1	4	2387	19	29181	PGSC0003DMG400003072,PGSC0003DMG400041458,Novel01891,PGSC0003DMG400015766
GO:0042752	regulation of circadian rhythm	biological_process	0.095864	1	1	2387	1	29181	PGSC0003DMG400020541
GO:0042754	negative regulation of circadian rhythm	biological_process	0.095864	1	1	2387	1	29181	PGSC0003DMG400020541
GO:0072657	protein localization to membrane	biological_process	0.096421	1	33	2387	289	29181	PGSC0003DMG400024365,PGSC0003DMG400031248,PGSC0003DMG400013629,PGSC0003DMG400010619,PGSC0003DMG400003647,PGSC0003DMG400033053,PGSC0003DMG402029267,PGSC0003DMG400021177,PGSC0003DMG401015043,PGSC0003DMG400003581,PGSC0003DMG400005839,PGSC0003DMG400024126,Novel02118,PGSC0003DMG401016933,PGSC0003DMG402029631,PGSC0003DMG402000927,Novel03396,PGSC0003DMG400001520,PGSC0003DMG400008871,PGSC0003DMG401029267…
GO:0016597	amino acid binding	molecular_function	0.097305	1	12	2387	86	29181	PGSC0003DMG402006673,PGSC0003DMG400021409,PGSC0003DMG400027654,PGSC0003DMG400028578,PGSC0003DMG400018939,PGSC0003DMG400014224,PGSC0003DMG400021719,PGSC0003DMG400025374,PGSC0003DMG400017440,PGSC0003DMG400008882,PGSC0003DMG400019514,PGSC0003DMG400012237
GO:0016887	ATPase activity	molecular_function	0.097977	1	94	2387	891	29181	Novel01891,PGSC0003DMG400000042,PGSC0003DMG400031271,PGSC0003DMG400009699,PGSC0003DMG400020086,PGSC0003DMG401023104,PGSC0003DMG400026226,PGSC0003DMG400010619,PGSC0003DMG400002980,PGSC0003DMG400000615,PGSC0003DMG400026643,PGSC0003DMG400004149,PGSC0003DMG400007092,Novel02589,PGSC0003DMG400012425,PGSC0003DMG400032166,PGSC0003DMG400013627,PGSC0003DMG400030507,PGSC0003DMG400025519,PGSC0003DMG400010361…
GO:0005929	cilium	cellular_component	0.098496	1	12	2387	97	29181	PGSC0003DMG400000498,PGSC0003DMG400028520,PGSC0003DMG400001417,PGSC0003DMG400019455,PGSC0003DMG400019824,PGSC0003DMG400012711,PGSC0003DMG400027534,PGSC0003DMG400004995,Novel02285,PGSC0003DMG400021282,PGSC0003DMG400017570,PGSC0003DMG401020784
GO:0031072	heat shock protein binding	molecular_function	0.098894	1	6	2387	41	29181	PGSC0003DMG401032143,PGSC0003DMG400024609,PGSC0003DMG400024481,PGSC0003DMG400025245,PGSC0003DMG400019150,PGSC0003DMG400023083
GO:0044710	single-organism metabolic process	biological_process	0.098895	1	681	2387	7534	29181	Novel02174,PGSC0003DMG400020708,PGSC0003DMG400028912,PGSC0003DMG402019668,PGSC0003DMG400003807,PGSC0003DMG400015128,PGSC0003DMG400015650,PGSC0003DMG401024871,PGSC0003DMG400019466,PGSC0003DMG400004312,PGSC0003DMG400030559,PGSC0003DMG400004579,PGSC0003DMG400016616,Novel01022,PGSC0003DMG400023191,PGSC0003DMG402010496,PGSC0003DMG400022713,PGSC0003DMG402027860,PGSC0003DMG401000923,PGSC0003DMG400012947…
GO:0019693	ribose phosphate metabolic process	biological_process	0.099205	1	59	2387	587	29181	Novel01389,PGSC0003DMG400027925,PGSC0003DMG400004995,PGSC0003DMG400020740,PGSC0003DMG400003882,PGSC0003DMG400023636,PGSC0003DMG400022770,PGSC0003DMG400003906,PGSC0003DMG400027321,PGSC0003DMG401029267,PGSC0003DMG400022825,PGSC0003DMG400010691,PGSC0003DMG400024701,PGSC0003DMG400020497,PGSC0003DMG400032558,PGSC0003DMG400018516,PGSC0003DMG400018369,PGSC0003DMG400015392,Novel03007,PGSC0003DMG400022417…
GO:0045095	keratin filament	cellular_component	0.099205	1	4	2387	19	29181	PGSC0003DMG400012603,PGSC0003DMG400025545,PGSC0003DMG400003380,PGSC0003DMG400001405
GO:0006310	DNA recombination	biological_process	0.099891	1	61	2387	570	29181	PGSC0003DMG400006034,PGSC0003DMG401013522,PGSC0003DMG400004149,PGSC0003DMG401005337,PGSC0003DMG400004579,PGSC0003DMG400012653,PGSC0003DMG400038020,PGSC0003DMG400003647,Novel01111,PGSC0003DMG400013550,PGSC0003DMG400020086,PGSC0003DMG402019668,PGSC0003DMG400000836,PGSC0003DMG400025545,PGSC0003DMG400030963,PGSC0003DMG400024365,PGSC0003DMG400031271,Novel02174,PGSC0003DMG400014225,PGSC0003DMG400014192…
GO:0004751	ribose-5-phosphate isomerase activity	molecular_function	0.1003	1	2	2387	7	29181	PGSC0003DMG400018369,PGSC0003DMG400021199
GO:0009052	pentose-phosphate shunt, non-oxidative branch	biological_process	0.1003	1	2	2387	7	29181	PGSC0003DMG400018369,PGSC0003DMG400021199
GO:0090150	establishment of protein localization to membrane	biological_process	0.10049	1	32	2387	281	29181	PGSC0003DMG401015043,PGSC0003DMG400021177,PGSC0003DMG402029267,PGSC0003DMG400033053,PGSC0003DMG400024126,PGSC0003DMG400005839,PGSC0003DMG400003581,PGSC0003DMG400024365,PGSC0003DMG400031248,PGSC0003DMG400010619,PGSC0003DMG400003647,PGSC0003DMG400010127,PGSC0003DMG400000401,PGSC0003DMG400007496,PGSC0003DMG400018116,PGSC0003DMG400024205,PGSC0003DMG400023525,PGSC0003DMG401003154,PGSC0003DMG400001391,…
GO:0046483	heterocycle metabolic process	biological_process	0.10084	1	749	2387	8498	29181	PGSC0003DMG400030017,Novel02589,PGSC0003DMG400015104,PGSC0003DMG400006977,PGSC0003DMG400027328,PGSC0003DMG400005904,PGSC0003DMG400030714,PGSC0003DMG400033668,PGSC0003DMG400004706,PGSC0003DMG400012554,PGSC0003DMG402003505,PGSC0003DMG400000836,PGSC0003DMG400011867,PGSC0003DMG401025427,PGSC0003DMG400007992,PGSC0003DMG400030963,PGSC0003DMG402004423,PGSC0003DMG400010620,PGSC0003DMG401011001,PGSC0003DM…
GO:0022836	gated channel activity	molecular_function	0.10102	1	28	2387	254	29181	PGSC0003DMG400009914,PGSC0003DMG402007034,PGSC0003DMG400007001,PGSC0003DMG400008840,PGSC0003DMG400005638,PGSC0003DMG400008839,Novel01525,PGSC0003DMG400030758,PGSC0003DMG400010170,PGSC0003DMG403002548,PGSC0003DMG400018811,PGSC0003DMG400022186,PGSC0003DMG400005154,PGSC0003DMG400006327,PGSC0003DMG400003618,PGSC0003DMG400026518,PGSC0003DMG400020215,PGSC0003DMG401029997,PGSC0003DMG400011330,PGSC0003DM…
GO:0019015	viral genome	cellular_component	0.1015	1	2	2387	6	29181	PGSC0003DMG400029625,PGSC0003DMG400023934
GO:0015085	calcium ion transmembrane transporter activity	molecular_function	0.10227	1	12	2387	101	29181	PGSC0003DMG400008839,Novel01525,PGSC0003DMG400005638,PGSC0003DMG400008840,PGSC0003DMG400003632,PGSC0003DMG401029997,PGSC0003DMG400006327,PGSC0003DMG400005154,PGSC0003DMG400009085,PGSC0003DMG400010170,PGSC0003DMG400026534,PGSC0003DMG402003606
GO:0000105	histidine biosynthetic process	biological_process	0.10239	1	9	2387	66	29181	PGSC0003DMG400023557,PGSC0003DMG400021248,PGSC0003DMG400005675,PGSC0003DMG400020344,PGSC0003DMG400024220,PGSC0003DMG400018421,PGSC0003DMG400006483,PGSC0003DMG400024926,PGSC0003DMG400003625
GO:0098772	molecular function regulator	molecular_function	0.10313	1	116	2387	1258	29181	PGSC0003DMG400017485,PGSC0003DMG400027770,PGSC0003DMG400018875,PGSC0003DMG400008563,PGSC0003DMG400029308,PGSC0003DMG400007667,PGSC0003DMG400001897,PGSC0003DMG403001724,PGSC0003DMG400005455,PGSC0003DMG400009098,PGSC0003DMG400007001,PGSC0003DMG400031821,PGSC0003DMG400014722,PGSC0003DMG400010170,Novel01192,PGSC0003DMG402003118,PGSC0003DMG400004343,PGSC0003DMG400030017,PGSC0003DMG400021168,PGSC0003DM…
GO:0000272	polysaccharide catabolic process	biological_process	0.10352	1	7	2387	45	29181	PGSC0003DMG400040684,PGSC0003DMG400010897,PGSC0003DMG400010664,PGSC0003DMG402020509,PGSC0003DMG400019332,PGSC0003DMG400030684,PGSC0003DMG400006048
GO:0050801	ion homeostasis	biological_process	0.10363	1	13	2387	116	29181	PGSC0003DMG400028320,PGSC0003DMG400009085,PGSC0003DMG400027119,PGSC0003DMG400026534,PGSC0003DMG400028497,Novel01525,PGSC0003DMG400005638,PGSC0003DMG400006102,PGSC0003DMG400024986,PGSC0003DMG400003632,PGSC0003DMG401029997,PGSC0003DMG400005154,PGSC0003DMG400006327
GO:0055080	cation homeostasis	biological_process	0.10363	1	13	2387	116	29181	PGSC0003DMG400027119,PGSC0003DMG400028497,PGSC0003DMG400026534,PGSC0003DMG400028320,PGSC0003DMG400009085,PGSC0003DMG400024986,PGSC0003DMG400003632,PGSC0003DMG400005154,PGSC0003DMG400006327,PGSC0003DMG401029997,PGSC0003DMG400005638,PGSC0003DMG400006102,Novel01525
GO:0098771	inorganic ion homeostasis	biological_process	0.10363	1	13	2387	116	29181	Novel01525,PGSC0003DMG400006102,PGSC0003DMG400005638,PGSC0003DMG400003632,PGSC0003DMG400024986,PGSC0003DMG401029997,PGSC0003DMG400006327,PGSC0003DMG400005154,PGSC0003DMG400028320,PGSC0003DMG400009085,PGSC0003DMG400027119,PGSC0003DMG400026534,PGSC0003DMG400028497
GO:0046834	lipid phosphorylation	biological_process	0.10376	1	4	2387	24	29181	PGSC0003DMG400033584,PGSC0003DMG402010355,PGSC0003DMG400010337,PGSC0003DMG400022917
GO:0046854	phosphatidylinositol phosphorylation	biological_process	0.10376	1	4	2387	24	29181	PGSC0003DMG400022917,PGSC0003DMG400010337,PGSC0003DMG402010355,PGSC0003DMG400033584
GO:0006399	tRNA metabolic process	biological_process	0.1038	1	82	2387	815	29181	PGSC0003DMG400003880,PGSC0003DMG401020090,Novel02174,PGSC0003DMG400003647,PGSC0003DMG400011521,PGSC0003DMG400016284,PGSC0003DMG400023334,PGSC0003DMG401027256,PGSC0003DMG400006034,PGSC0003DMG402032565,PGSC0003DMG400030092,PGSC0003DMG400025166,PGSC0003DMG400010119,PGSC0003DMG400007010,PGSC0003DMG400019257,PGSC0003DMG400017211,PGSC0003DMG400022873,PGSC0003DMG400031119,PGSC0003DMG400013857,PGSC0003DM…
GO:0031854	orexigenic neuropeptide QRFP receptor binding	molecular_function	0.10454	1	1	2387	3	29181	PGSC0003DMG400014701
GO:0042908	xenobiotic transport	biological_process	0.10526	1	1	2387	1	29181	PGSC0003DMG400011000
GO:0042910	xenobiotic transporter activity	molecular_function	0.10526	1	1	2387	1	29181	PGSC0003DMG400011000
GO:0042919	benzoate transport	biological_process	0.10526	1	1	2387	1	29181	PGSC0003DMG400011000
GO:0042925	benzoate transporter activity	molecular_function	0.10526	1	1	2387	1	29181	PGSC0003DMG400011000
GO:0006396	RNA processing	biological_process	0.10583	1	132	2387	1362	29181	PGSC0003DMG400006034,PGSC0003DMG402032565,PGSC0003DMG400030092,PGSC0003DMG400011521,PGSC0003DMG400023334,PGSC0003DMG401027256,PGSC0003DMG400014268,PGSC0003DMG400032104,PGSC0003DMG401024930,PGSC0003DMG400002200,PGSC0003DMG400030849,PGSC0003DMG401020090,PGSC0003DMG400030510,PGSC0003DMG400024248,PGSC0003DMG400016997,PGSC0003DMG400001417,PGSC0003DMG400006129,PGSC0003DMG400031119,PGSC0003DMG400019257,…
GO:0006163	purine nucleotide metabolic process	biological_process	0.10755	1	57	2387	569	29181	PGSC0003DMG400013106,PGSC0003DMG400030714,PGSC0003DMG400010913,PGSC0003DMG400007092,PGSC0003DMG400000367,PGSC0003DMG400005926,PGSC0003DMG400016820,PGSC0003DMG400024220,PGSC0003DMG401000923,PGSC0003DMG400022893,PGSC0003DMG400013857,PGSC0003DMG400019734,PGSC0003DMG402019176,PGSC0003DMG402027860,PGSC0003DMG400021607,PGSC0003DMG400014217,PGSC0003DMG400025519,PGSC0003DMG400029615,PGSC0003DMG400005256,…
GO:0006081	cellular aldehyde metabolic process	biological_process	0.10758	1	6	2387	40	29181	PGSC0003DMG400018369,PGSC0003DMG400000112,PGSC0003DMG400019717,PGSC0003DMG400006483,PGSC0003DMG400021199,PGSC0003DMG400015194
GO:0006450	regulation of translational fidelity	biological_process	0.10783	1	2	2387	7	29181	PGSC0003DMG400031029,PGSC0003DMG400000716
GO:0005956	protein kinase CK2 complex	cellular_component	0.10798	1	2	2387	7	29181	PGSC0003DMG400007001,PGSC0003DMG403001724
GO:1902494	catalytic complex	cellular_component	0.10871	1	107	2387	1126	29181	PGSC0003DMG400017510,PGSC0003DMG400013280,PGSC0003DMG400014316,Novel00239,PGSC0003DMG400022027,PGSC0003DMG400018939,PGSC0003DMG400005742,PGSC0003DMG400006975,PGSC0003DMG400023881,PGSC0003DMG400011089,PGSC0003DMG400016608,PGSC0003DMG400028579,PGSC0003DMG400012193,PGSC0003DMG400001398,PGSC0003DMG400009981,PGSC0003DMG400012447,PGSC0003DMG400010007,PGSC0003DMG400001391,PGSC0003DMG400009420,PGSC0003DM…
GO:0015103	inorganic anion transmembrane transporter activity	molecular_function	0.11051	1	13	2387	92	29181	PGSC0003DMG402028252,PGSC0003DMG400020136,PGSC0003DMG400012239,PGSC0003DMG400008660,PGSC0003DMG400007683,PGSC0003DMG400020215,PGSC0003DMG400011000,PGSC0003DMG400015470,PGSC0003DMG400011330,PGSC0003DMG400006975,PGSC0003DMG400021862,PGSC0003DMG400022186,PGSC0003DMG400009994
GO:0003724	RNA helicase activity	molecular_function	0.11155	1	33	2387	282	29181	PGSC0003DMG400041450,Novel01267,PGSC0003DMG400007496,PGSC0003DMG400001406,PGSC0003DMG400020172,PGSC0003DMG400018461,PGSC0003DMG401003154,PGSC0003DMG401002242,PGSC0003DMG402016772,PGSC0003DMG400015506,PGSC0003DMG400008871,PGSC0003DMG400020587,PGSC0003DMG400026493,PGSC0003DMG400020249,PGSC0003DMG400022027,PGSC0003DMG400004750,PGSC0003DMG400024571,PGSC0003DMG402029631,PGSC0003DMG403026842,PGSC0003DM…
GO:0006753	nucleoside phosphate metabolic process	biological_process	0.11228	1	72	2387	731	29181	PGSC0003DMG401029267,PGSC0003DMG400022825,PGSC0003DMG400027925,PGSC0003DMG400004995,PGSC0003DMG400023467,PGSC0003DMG400022770,PGSC0003DMG400003906,PGSC0003DMG400003882,PGSC0003DMG400020740,PGSC0003DMG400023569,PGSC0003DMG400023636,PGSC0003DMG400010007,PGSC0003DMG400022417,PGSC0003DMG402020303,PGSC0003DMG400020497,PGSC0003DMG400030870,PGSC0003DMG400015392,PGSC0003DMG400009353,PGSC0003DMG400024914,…
GO:0071704	organic substance metabolic process	biological_process	0.11229	1	1278	2387	14590	29181	PGSC0003DMG400003262,PGSC0003DMG400033053,PGSC0003DMG400014327,PGSC0003DMG400026427,PGSC0003DMG400001317,PGSC0003DMG400030985,PGSC0003DMG400019620,PGSC0003DMG400031130,PGSC0003DMG400004061,PGSC0003DMG400003653,PGSC0003DMG400025519,PGSC0003DMG400013962,PGSC0003DMG400032166,PGSC0003DMG401003285,PGSC0003DMG400001123,PGSC0003DMG400031271,PGSC0003DMG400000042,PGSC0003DMG401019239,PGSC0003DMG400019635,…
GO:0060255	regulation of macromolecule metabolic process	biological_process	0.1124	1	363	2387	3991	29181	Novel01111,PGSC0003DMG400023334,PGSC0003DMG400022312,PGSC0003DMG400000498,PGSC0003DMG400041458,PGSC0003DMG400014225,PGSC0003DMG400024953,PGSC0003DMG400030849,PGSC0003DMG400031248,PGSC0003DMG400009530,PGSC0003DMG400032104,PGSC0003DMG400014268,PGSC0003DMG400025811,PGSC0003DMG400013943,PGSC0003DMG400001417,Novel02710,PGSC0003DMG400018352,PGSC0003DMG400016812,PGSC0003DMG401020596,PGSC0003DMG402021193…
GO:0016459	myosin complex	cellular_component	0.11249	1	7	2387	45	29181	PGSC0003DMG400025028,PGSC0003DMG400014709,PGSC0003DMG400032104,PGSC0003DMG400022027,Novel02867,Novel00773,PGSC0003DMG400011264
GO:0007031	peroxisome organization	biological_process	0.11266	1	8	2387	60	29181	PGSC0003DMG401010181,PGSC0003DMG400005328,Novel02174,PGSC0003DMG400020619,PGSC0003DMG400001391,PGSC0003DMG400006457,PGSC0003DMG400020136,PGSC0003DMG400027850
GO:0030234	enzyme regulator activity	molecular_function	0.11328	1	89	2387	954	29181	PGSC0003DMG400004723,PGSC0003DMG400019574,Novel03212,PGSC0003DMG400010132,PGSC0003DMG400000292,PGSC0003DMG400014263,Novel02783,PGSC0003DMG400017928,PGSC0003DMG400030374,PGSC0003DMG400015251,PGSC0003DMG400021168,PGSC0003DMG400000615,PGSC0003DMG400029723,PGSC0003DMG400022691,PGSC0003DMG400004735,PGSC0003DMG400010145,PGSC0003DMG401011001,PGSC0003DMG400014722,PGSC0003DMG400030017,PGSC0003DMG402003118…
GO:0031647	regulation of protein stability	biological_process	0.11391	1	5	2387	29	29181	PGSC0003DMG400007717,PGSC0003DMG400013444,PGSC0003DMG400004168,Novel02306,PGSC0003DMG400007346
GO:0050821	protein stabilization	biological_process	0.11391	1	5	2387	29	29181	PGSC0003DMG400013444,PGSC0003DMG400007717,PGSC0003DMG400004168,Novel02306,PGSC0003DMG400007346
GO:0005852	eukaryotic translation initiation factor 3 complex	cellular_component	0.11399	1	6	2387	35	29181	PGSC0003DMG400029694,PGSC0003DMG400022942,PGSC0003DMG400027858,PGSC0003DMG400026534,PGSC0003DMG400019647,PGSC0003DMG400033615
GO:0009150	purine ribonucleotide metabolic process	biological_process	0.1143	1	56	2387	562	29181	PGSC0003DMG400027321,PGSC0003DMG401029267,PGSC0003DMG400010691,PGSC0003DMG400022825,PGSC0003DMG400027925,Novel01389,PGSC0003DMG400020740,PGSC0003DMG400003882,PGSC0003DMG400023636,PGSC0003DMG400003906,PGSC0003DMG400022770,PGSC0003DMG400004995,Novel03007,PGSC0003DMG400022417,PGSC0003DMG400010007,PGSC0003DMG402020303,PGSC0003DMG400015766,PGSC0003DMG400032558,PGSC0003DMG400018516,PGSC0003DMG400024701…
GO:0036094	small molecule binding	molecular_function	0.11479	1	517	2387	5355	29181	PGSC0003DMG400023814,PGSC0003DMG400003647,PGSC0003DMG400005154,PGSC0003DMG401007575,PGSC0003DMG400023282,PGSC0003DMG400004814,PGSC0003DMG400017596,PGSC0003DMG402004578,PGSC0003DMG400019718,PGSC0003DMG400006916,PGSC0003DMG401029775,PGSC0003DMG400027683,PGSC0003DMG400021719,Novel00622,PGSC0003DMG400008871,PGSC0003DMG400026493,PGSC0003DMG400031026,PGSC0003DMG400005943,PGSC0003DMG400000872,PGSC0003DM…
GO:0009190	cyclic nucleotide biosynthetic process	biological_process	0.11506	1	4	2387	22	29181	PGSC0003DMG400030100,PGSC0003DMG402020303,PGSC0003DMG400031029,PGSC0003DMG400018516
GO:0015385	sodium:proton antiporter activity	molecular_function	0.11607	1	3	2387	13	29181	PGSC0003DMG400027061,PGSC0003DMG400022604,PGSC0003DMG400005301
GO:0019310	inositol catabolic process	biological_process	0.11674	1	2	2387	7	29181	PGSC0003DMG401000287,PGSC0003DMG400001998
GO:0046164	alcohol catabolic process	biological_process	0.11674	1	2	2387	7	29181	PGSC0003DMG400001998,PGSC0003DMG401000287
GO:0046174	polyol catabolic process	biological_process	0.11674	1	2	2387	7	29181	PGSC0003DMG400001998,PGSC0003DMG401000287
GO:0050113	inositol oxygenase activity	molecular_function	0.11674	1	2	2387	7	29181	PGSC0003DMG400001998,PGSC0003DMG401000287
GO:1901616	organic hydroxy compound catabolic process	biological_process	0.11674	1	2	2387	7	29181	PGSC0003DMG400001998,PGSC0003DMG401000287
GO:0043086	negative regulation of catalytic activity	biological_process	0.11696	1	12	2387	97	29181	PGSC0003DMG400018107,PGSC0003DMG402013013,PGSC0003DMG400000292,PGSC0003DMG400019574,PGSC0003DMG400022209,PGSC0003DMG401007235,PGSC0003DMG402008019,PGSC0003DMG400008931,PGSC0003DMG400010438,PGSC0003DMG400019455,PGSC0003DMG400023478,PGSC0003DMG400022061
GO:0044092	negative regulation of molecular function	biological_process	0.11696	1	12	2387	97	29181	PGSC0003DMG402008019,PGSC0003DMG401007235,PGSC0003DMG400019574,PGSC0003DMG400022209,PGSC0003DMG402013013,PGSC0003DMG400018107,PGSC0003DMG400000292,PGSC0003DMG400022061,PGSC0003DMG400023478,PGSC0003DMG400010438,PGSC0003DMG400019455,PGSC0003DMG400008931
GO:0051346	negative regulation of hydrolase activity	biological_process	0.11723	1	6	2387	41	29181	PGSC0003DMG401007235,PGSC0003DMG400010438,PGSC0003DMG402008019,PGSC0003DMG400018107,PGSC0003DMG400000292,PGSC0003DMG400019574
GO:0051171	regulation of nitrogen compound metabolic process	biological_process	0.11773	1	345	2387	3796	29181	PGSC0003DMG402013013,PGSC0003DMG400019523,PGSC0003DMG400022867,PGSC0003DMG400018435,PGSC0003DMG400002537,PGSC0003DMG400022893,PGSC0003DMG400000716,PGSC0003DMG400004415,Novel02803,PGSC0003DMG400030519,PGSC0003DMG400020422,PGSC0003DMG400002272,PGSC0003DMG400016465,PGSC0003DMG400027323,PGSC0003DMG400015232,PGSC0003DMG401024930,PGSC0003DMG400023619,PGSC0003DMG401014557,PGSC0003DMG400015849,PGSC0003DM…
GO:0006414	translational elongation	biological_process	0.11807	1	11	2387	84	29181	PGSC0003DMG400030519,PGSC0003DMG400002045,PGSC0003DMG400003564,PGSC0003DMG400022893,PGSC0003DMG400000716,Novel00814,PGSC0003DMG402028565,PGSC0003DMG400031029,PGSC0003DMG400007717,PGSC0003DMG400003138,PGSC0003DMG402002977
GO:0005158	insulin receptor binding	molecular_function	0.11813	1	2	2387	6	29181	PGSC0003DMG400029545,PGSC0003DMG400001496
GO:0006784	heme a biosynthetic process	biological_process	0.11863	1	2	2387	7	29181	PGSC0003DMG402004821,PGSC0003DMG400045083
GO:0046160	heme a metabolic process	biological_process	0.11863	1	2	2387	7	29181	PGSC0003DMG402004821,PGSC0003DMG400045083
GO:0043189	H4/H2A histone acetyltransferase complex	cellular_component	0.11879	1	3	2387	14	29181	PGSC0003DMG400000180,Novel01118,PGSC0003DMG400012196
GO:1902562	H4 histone acetyltransferase complex	cellular_component	0.11879	1	3	2387	14	29181	PGSC0003DMG400012196,Novel01118,PGSC0003DMG400000180
GO:0019073	viral DNA genome packaging	biological_process	0.1192	1	4	2387	23	29181	PGSC0003DMG400004167,PGSC0003DMG403003025,PGSC0003DMG400009939,PGSC0003DMG400005197
GO:1902590	multi-organism organelle organization	biological_process	0.1192	1	4	2387	23	29181	PGSC0003DMG400004167,PGSC0003DMG403003025,PGSC0003DMG400005197,PGSC0003DMG400009939
GO:0042822	pyridoxal phosphate metabolic process	biological_process	0.11931	1	3	2387	15	29181	PGSC0003DMG400019717,PGSC0003DMG400006483,PGSC0003DMG400000112
GO:0042823	pyridoxal phosphate biosynthetic process	biological_process	0.11931	1	3	2387	15	29181	PGSC0003DMG400019717,PGSC0003DMG400006483,PGSC0003DMG400000112
GO:0046184	aldehyde biosynthetic process	biological_process	0.11931	1	3	2387	15	29181	PGSC0003DMG400006483,PGSC0003DMG400019717,PGSC0003DMG400000112
GO:0007409	axonogenesis	biological_process	0.11944	1	8	2387	53	29181	PGSC0003DMG400000394,PGSC0003DMG400016389,PGSC0003DMG400030663,PGSC0003DMG400013949,PGSC0003DMG400029165,PGSC0003DMG400027703,PGSC0003DMG400019615,PGSC0003DMG400016465
GO:0007411	axon guidance	biological_process	0.11944	1	8	2387	53	29181	PGSC0003DMG400016465,PGSC0003DMG400029165,PGSC0003DMG400027703,PGSC0003DMG400019615,PGSC0003DMG400013949,PGSC0003DMG400030663,PGSC0003DMG400000394,PGSC0003DMG400016389
GO:0048667	cell morphogenesis involved in neuron differentiation	biological_process	0.11944	1	8	2387	53	29181	PGSC0003DMG400000394,PGSC0003DMG400016389,PGSC0003DMG400016465,PGSC0003DMG400029165,PGSC0003DMG400027703,PGSC0003DMG400019615,PGSC0003DMG400013949,PGSC0003DMG400030663
GO:0048812	neuron projection morphogenesis	biological_process	0.11944	1	8	2387	53	29181	PGSC0003DMG400000394,PGSC0003DMG400016389,PGSC0003DMG400016465,PGSC0003DMG400027703,PGSC0003DMG400029165,PGSC0003DMG400019615,PGSC0003DMG400013949,PGSC0003DMG400030663
GO:0061564	axon development	biological_process	0.11944	1	8	2387	53	29181	PGSC0003DMG400013949,PGSC0003DMG400030663,PGSC0003DMG400016465,PGSC0003DMG400027703,PGSC0003DMG400029165,PGSC0003DMG400019615,PGSC0003DMG400000394,PGSC0003DMG400016389
GO:0097485	neuron projection guidance	biological_process	0.11944	1	8	2387	53	29181	PGSC0003DMG400016389,PGSC0003DMG400000394,PGSC0003DMG400030663,PGSC0003DMG400013949,PGSC0003DMG400019615,PGSC0003DMG400027703,PGSC0003DMG400029165,PGSC0003DMG400016465
GO:0015939	pantothenate metabolic process	biological_process	0.11954	1	2	2387	7	29181	PGSC0003DMG400025194,PGSC0003DMG400003882
GO:0015940	pantothenate biosynthetic process	biological_process	0.11954	1	2	2387	7	29181	PGSC0003DMG400025194,PGSC0003DMG400003882
GO:0016491	oxidoreductase activity	molecular_function	0.12068	1	337	2387	3729	29181	PGSC0003DMG400005673,PGSC0003DMG400009016,PGSC0003DMG400015194,Novel00377,PGSC0003DMG400010414,PGSC0003DMG402004821,PGSC0003DMG400024490,PGSC0003DMG400033932,PGSC0003DMG400026762,PGSC0003DMG400005213,PGSC0003DMG400003103,PGSC0003DMG400026430,PGSC0003DMG400022093,PGSC0003DMG400005097,PGSC0003DMG401026447,PGSC0003DMG400001398,PGSC0003DMG400020962,PGSC0003DMG400015546,PGSC0003DMG400017715,PGSC0003DM…
GO:0016108	tetraterpenoid metabolic process	biological_process	0.12204	1	10	2387	70	29181	PGSC0003DMG400006854,PGSC0003DMG400029626,PGSC0003DMG400006822,PGSC0003DMG400014873,PGSC0003DMG400004020,Novel01333,PGSC0003DMG400004168,PGSC0003DMG400004844,PGSC0003DMG400019257,PGSC0003DMG400001117
GO:0016109	tetraterpenoid biosynthetic process	biological_process	0.12204	1	10	2387	70	29181	PGSC0003DMG400004020,PGSC0003DMG400014873,PGSC0003DMG400029626,PGSC0003DMG400006854,PGSC0003DMG400006822,PGSC0003DMG400004168,PGSC0003DMG400004844,PGSC0003DMG400001117,PGSC0003DMG400019257,Novel01333
GO:0016116	carotenoid metabolic process	biological_process	0.12204	1	10	2387	70	29181	PGSC0003DMG400004168,PGSC0003DMG400004844,PGSC0003DMG400019257,PGSC0003DMG400001117,Novel01333,PGSC0003DMG400004020,PGSC0003DMG400014873,PGSC0003DMG400029626,PGSC0003DMG400006854,PGSC0003DMG400006822
GO:0016117	carotenoid biosynthetic process	biological_process	0.12204	1	10	2387	70	29181	PGSC0003DMG400004168,PGSC0003DMG400004844,PGSC0003DMG400001117,PGSC0003DMG400019257,Novel01333,PGSC0003DMG400014873,PGSC0003DMG400004020,PGSC0003DMG400006854,PGSC0003DMG400029626,PGSC0003DMG400006822
GO:0008113	peptide-methionine (S)-S-oxide reductase activity	molecular_function	0.12256	1	2	2387	8	29181	PGSC0003DMG400003634,PGSC0003DMG400010414
GO:0007094	mitotic spindle assembly checkpoint	biological_process	0.12297	1	6	2387	40	29181	PGSC0003DMG400019455,PGSC0003DMG400022061,PGSC0003DMG400023478,PGSC0003DMG402013013,PGSC0003DMG400008931,PGSC0003DMG400022209
GO:0009895	negative regulation of catabolic process	biological_process	0.12297	1	6	2387	40	29181	PGSC0003DMG402013013,PGSC0003DMG400022209,PGSC0003DMG400008931,PGSC0003DMG400019455,PGSC0003DMG400023478,PGSC0003DMG400022061
GO:0031330	negative regulation of cellular catabolic process	biological_process	0.12297	1	6	2387	40	29181	PGSC0003DMG400019455,PGSC0003DMG400023478,PGSC0003DMG400022061,PGSC0003DMG402013013,PGSC0003DMG400022209,PGSC0003DMG400008931
GO:0031396	regulation of protein ubiquitination	biological_process	0.12297	1	6	2387	40	29181	PGSC0003DMG400019455,PGSC0003DMG400022061,PGSC0003DMG400023478,PGSC0003DMG402013013,PGSC0003DMG400022209,PGSC0003DMG400008931
GO:0031397	negative regulation of protein ubiquitination	biological_process	0.12297	1	6	2387	40	29181	PGSC0003DMG400019455,PGSC0003DMG400023478,PGSC0003DMG400022061,PGSC0003DMG402013013,PGSC0003DMG400022209,PGSC0003DMG400008931
GO:0031577	spindle checkpoint	biological_process	0.12297	1	6	2387	40	29181	PGSC0003DMG400023478,PGSC0003DMG400022061,PGSC0003DMG400019455,PGSC0003DMG400022209,PGSC0003DMG400008931,PGSC0003DMG402013013
GO:0032435	negative regulation of proteasomal ubiquitin-dependent protein catabolic process	biological_process	0.12297	1	6	2387	40	29181	PGSC0003DMG402013013,PGSC0003DMG400022209,PGSC0003DMG400008931,PGSC0003DMG400019455,PGSC0003DMG400022061,PGSC0003DMG400023478
GO:0033046	negative regulation of sister chromatid segregation	biological_process	0.12297	1	6	2387	40	29181	PGSC0003DMG400023478,PGSC0003DMG400022061,PGSC0003DMG400019455,PGSC0003DMG400008931,PGSC0003DMG400022209,PGSC0003DMG402013013
GO:0033048	negative regulation of mitotic sister chromatid segregation	biological_process	0.12297	1	6	2387	40	29181	PGSC0003DMG400022061,PGSC0003DMG400023478,PGSC0003DMG400019455,PGSC0003DMG400008931,PGSC0003DMG400022209,PGSC0003DMG402013013
GO:0042177	negative regulation of protein catabolic process	biological_process	0.12297	1	6	2387	40	29181	PGSC0003DMG400019455,PGSC0003DMG400022061,PGSC0003DMG400023478,PGSC0003DMG402013013,PGSC0003DMG400008931,PGSC0003DMG400022209
GO:0045839	negative regulation of mitotic nuclear division	biological_process	0.12297	1	6	2387	40	29181	PGSC0003DMG400023478,PGSC0003DMG400022061,PGSC0003DMG400019455,PGSC0003DMG400008931,PGSC0003DMG400022209,PGSC0003DMG402013013
GO:0045841	negative regulation of mitotic metaphase/anaphase transition	biological_process	0.12297	1	6	2387	40	29181	PGSC0003DMG400008931,PGSC0003DMG400022209,PGSC0003DMG402013013,PGSC0003DMG400022061,PGSC0003DMG400023478,PGSC0003DMG400019455
GO:0051340	regulation of ligase activity	biological_process	0.12297	1	6	2387	40	29181	PGSC0003DMG400019455,PGSC0003DMG400022061,PGSC0003DMG400023478,PGSC0003DMG402013013,PGSC0003DMG400008931,PGSC0003DMG400022209
GO:0051352	negative regulation of ligase activity	biological_process	0.12297	1	6	2387	40	29181	PGSC0003DMG400022061,PGSC0003DMG400023478,PGSC0003DMG400019455,PGSC0003DMG400008931,PGSC0003DMG400022209,PGSC0003DMG402013013
GO:0051436	negative regulation of ubiquitin-protein ligase activity involved in mitotic cell cycle	biological_process	0.12297	1	6	2387	40	29181	PGSC0003DMG402013013,PGSC0003DMG400008931,PGSC0003DMG400022209,PGSC0003DMG400019455,PGSC0003DMG400022061,PGSC0003DMG400023478
GO:0051438	regulation of ubiquitin-protein transferase activity	biological_process	0.12297	1	6	2387	40	29181	PGSC0003DMG400022061,PGSC0003DMG400023478,PGSC0003DMG400019455,PGSC0003DMG400008931,PGSC0003DMG400022209,PGSC0003DMG402013013
GO:0051439	regulation of ubiquitin-protein ligase activity involved in mitotic cell cycle	biological_process	0.12297	1	6	2387	40	29181	PGSC0003DMG402013013,PGSC0003DMG400008931,PGSC0003DMG400022209,PGSC0003DMG400019455,PGSC0003DMG400023478,PGSC0003DMG400022061
GO:0051444	negative regulation of ubiquitin-protein transferase activity	biological_process	0.12297	1	6	2387	40	29181	PGSC0003DMG400022061,PGSC0003DMG400023478,PGSC0003DMG400019455,PGSC0003DMG400022209,PGSC0003DMG400008931,PGSC0003DMG402013013
GO:0051985	negative regulation of chromosome segregation	biological_process	0.12297	1	6	2387	40	29181	PGSC0003DMG400022209,PGSC0003DMG400008931,PGSC0003DMG402013013,PGSC0003DMG400023478,PGSC0003DMG400022061,PGSC0003DMG400019455
GO:0071173	spindle assembly checkpoint	biological_process	0.12297	1	6	2387	40	29181	PGSC0003DMG400019455,PGSC0003DMG400022061,PGSC0003DMG400023478,PGSC0003DMG402013013,PGSC0003DMG400022209,PGSC0003DMG400008931
GO:0071174	mitotic spindle checkpoint	biological_process	0.12297	1	6	2387	40	29181	PGSC0003DMG402013013,PGSC0003DMG400022209,PGSC0003DMG400008931,PGSC0003DMG400019455,PGSC0003DMG400023478,PGSC0003DMG400022061
GO:1901799	negative regulation of proteasomal protein catabolic process	biological_process	0.12297	1	6	2387	40	29181	PGSC0003DMG400019455,PGSC0003DMG400022061,PGSC0003DMG400023478,PGSC0003DMG402013013,PGSC0003DMG400022209,PGSC0003DMG400008931
GO:1902100	negative regulation of metaphase/anaphase transition of cell cycle	biological_process	0.12297	1	6	2387	40	29181	PGSC0003DMG400008931,PGSC0003DMG400022209,PGSC0003DMG402013013,PGSC0003DMG400022061,PGSC0003DMG400023478,PGSC0003DMG400019455
GO:1903051	negative regulation of proteolysis involved in cellular protein catabolic process	biological_process	0.12297	1	6	2387	40	29181	PGSC0003DMG400019455,PGSC0003DMG400022061,PGSC0003DMG400023478,PGSC0003DMG402013013,PGSC0003DMG400022209,PGSC0003DMG400008931
GO:1903320	regulation of protein modification by small protein conjugation or removal	biological_process	0.12297	1	6	2387	40	29181	PGSC0003DMG400019455,PGSC0003DMG400022061,PGSC0003DMG400023478,PGSC0003DMG402013013,PGSC0003DMG400008931,PGSC0003DMG400022209
GO:1903321	negative regulation of protein modification by small protein conjugation or removal	biological_process	0.12297	1	6	2387	40	29181	PGSC0003DMG400022061,PGSC0003DMG400023478,PGSC0003DMG400019455,PGSC0003DMG400008931,PGSC0003DMG400022209,PGSC0003DMG402013013
GO:1903363	negative regulation of cellular protein catabolic process	biological_process	0.12297	1	6	2387	40	29181	PGSC0003DMG402013013,PGSC0003DMG400008931,PGSC0003DMG400022209,PGSC0003DMG400019455,PGSC0003DMG400022061,PGSC0003DMG400023478
GO:1904666	regulation of ubiquitin protein ligase activity	biological_process	0.12297	1	6	2387	40	29181	PGSC0003DMG402013013,PGSC0003DMG400008931,PGSC0003DMG400022209,PGSC0003DMG400019455,PGSC0003DMG400022061,PGSC0003DMG400023478
GO:1904667	negative regulation of ubiquitin protein ligase activity	biological_process	0.12297	1	6	2387	40	29181	PGSC0003DMG400019455,PGSC0003DMG400023478,PGSC0003DMG400022061,PGSC0003DMG402013013,PGSC0003DMG400022209,PGSC0003DMG400008931
GO:2000816	negative regulation of mitotic sister chromatid separation	biological_process	0.12297	1	6	2387	40	29181	PGSC0003DMG400022209,PGSC0003DMG400008931,PGSC0003DMG402013013,PGSC0003DMG400023478,PGSC0003DMG400022061,PGSC0003DMG400019455
GO:2001251	negative regulation of chromosome organization	biological_process	0.12297	1	6	2387	40	29181	PGSC0003DMG402013013,PGSC0003DMG400008931,PGSC0003DMG400022209,PGSC0003DMG400019455,PGSC0003DMG400023478,PGSC0003DMG400022061
GO:0003830	beta-1,4-mannosylglycoprotein 4-beta-N-acetylglucosaminyltransferase activity	molecular_function	0.1237	1	2	2387	6	29181	PGSC0003DMG400030897,PGSC0003DMG400012635
GO:0016863	intramolecular oxidoreductase activity, transposing C=C bonds	molecular_function	0.12398	1	3	2387	14	29181	PGSC0003DMG400003564,PGSC0003DMG400007379,PGSC0003DMG400003411
GO:0009110	vitamin biosynthetic process	biological_process	0.12423	1	21	2387	189	29181	PGSC0003DMG402003505,PGSC0003DMG400025194,PGSC0003DMG401023772,PGSC0003DMG400029879,PGSC0003DMG400007496,PGSC0003DMG400006483,PGSC0003DMG400010413,PGSC0003DMG400003540,PGSC0003DMG400032110,PGSC0003DMG400000112,PGSC0003DMG402004423,PGSC0003DMG400022418,PGSC0003DMG400032104,PGSC0003DMG400007012,PGSC0003DMG400009122,PGSC0003DMG400019717,PGSC0003DMG400026577,PGSC0003DMG400024336,PGSC0003DMG400003882,…
GO:0042364	water-soluble vitamin biosynthetic process	biological_process	0.12423	1	21	2387	189	29181	PGSC0003DMG400000112,PGSC0003DMG402004423,PGSC0003DMG400022418,PGSC0003DMG400032110,PGSC0003DMG400003540,PGSC0003DMG400023636,PGSC0003DMG400003882,PGSC0003DMG400024336,PGSC0003DMG400026534,PGSC0003DMG400026577,PGSC0003DMG400009122,PGSC0003DMG400007012,PGSC0003DMG400032104,PGSC0003DMG400019717,PGSC0003DMG400025194,PGSC0003DMG400029879,PGSC0003DMG401023772,PGSC0003DMG402003505,PGSC0003DMG400010413,…
GO:0016742	hydroxymethyl-, formyl- and related transferase activity	molecular_function	0.1247	1	4	2387	22	29181	PGSC0003DMG400022891,PGSC0003DMG401004821,PGSC0003DMG400025194,PGSC0003DMG400003882
GO:0070876	SOSS complex	cellular_component	0.1247	1	2	2387	6	29181	PGSC0003DMG400028158,Novel01659
GO:0034641	cellular nitrogen compound metabolic process	biological_process	0.12495	1	826	2387	9495	29181	PGSC0003DMG400016679,PGSC0003DMG400013401,PGSC0003DMG400024267,PGSC0003DMG400030246,PGSC0003DMG400023434,PGSC0003DMG400021203,PGSC0003DMG400039300,PGSC0003DMG400010691,PGSC0003DMG400032110,PGSC0003DMG400020344,PGSC0003DMG400001766,PGSC0003DMG400042507,PGSC0003DMG400015506,PGSC0003DMG401015876,PGSC0003DMG400012196,PGSC0003DMG400001520,PGSC0003DMG400022232,PGSC0003DMG402011372,Novel00317,PGSC0003DM…
GO:0000155	phosphorelay sensor kinase activity	molecular_function	0.12797	1	14	2387	117	29181	PGSC0003DMG400016284,PGSC0003DMG400004233,Novel01267,PGSC0003DMG400015766,PGSC0003DMG401024871,PGSC0003DMG400003072,PGSC0003DMG400023402,Novel03299,PGSC0003DMG400031819,PGSC0003DMG400034307,PGSC0003DMG400025263,PGSC0003DMG400017186,PGSC0003DMG400007242,PGSC0003DMG402005733
GO:0015075	ion transmembrane transporter activity	molecular_function	0.1281	1	171	2387	1839	29181	PGSC0003DMG400020136,PGSC0003DMG400022604,PGSC0003DMG400006327,PGSC0003DMG400005612,PGSC0003DMG400032104,PGSC0003DMG400028924,PGSC0003DMG402029307,PGSC0003DMG400024953,PGSC0003DMG400022893,Novel01525,PGSC0003DMG400005301,PGSC0003DMG400013857,PGSC0003DMG400030519,Novel03303,PGSC0003DMG402007034,PGSC0003DMG400026156,PGSC0003DMG400016997,PGSC0003DMG400000209,PGSC0003DMG402006035,Novel00273,PGSC0003D…
GO:0009259	ribonucleotide metabolic process	biological_process	0.12823	1	57	2387	577	29181	PGSC0003DMG400015392,PGSC0003DMG400018516,PGSC0003DMG400032558,PGSC0003DMG400024701,PGSC0003DMG400020497,PGSC0003DMG402020303,PGSC0003DMG400015766,PGSC0003DMG400022417,Novel03007,PGSC0003DMG400010007,PGSC0003DMG400023636,PGSC0003DMG400020740,PGSC0003DMG400003882,PGSC0003DMG400003906,PGSC0003DMG400022770,PGSC0003DMG400004995,PGSC0003DMG400027925,Novel01389,PGSC0003DMG400010691,PGSC0003DMG400022825…
GO:0006259	DNA metabolic process	biological_process	0.12905	1	233	2387	2503	29181	Novel01235,PGSC0003DMG400011045,PGSC0003DMG400011777,PGSC0003DMG400022885,PGSC0003DMG400022453,Novel01966,PGSC0003DMG402021193,PGSC0003DMG400009939,PGSC0003DMG401026923,PGSC0003DMG401018599,PGSC0003DMG400000462,PGSC0003DMG400044006,PGSC0003DMG400003581,PGSC0003DMG400005301,PGSC0003DMG400022893,PGSC0003DMG400015492,PGSC0003DMG400004429,PGSC0003DMG400001417,PGSC0003DMG400004415,Novel02710,PGSC0003D…
GO:0010167	response to nitrate	biological_process	0.12983	1	2	2387	8	29181	Novel02265,PGSC0003DMG400000351
GO:0015706	nitrate transport	biological_process	0.12983	1	2	2387	8	29181	Novel02265,PGSC0003DMG400000351
GO:0016423	tRNA (guanine) methyltransferase activity	molecular_function	0.12986	1	8	2387	57	29181	PGSC0003DMG400003882,Novel03182,PGSC0003DMG400003614,PGSC0003DMG400022873,PGSC0003DMG400020053,PGSC0003DMG400023836,PGSC0003DMG400021659,PGSC0003DMG402032565
GO:0005244	voltage-gated ion channel activity	molecular_function	0.13052	1	12	2387	97	29181	PGSC0003DMG400018811,PGSC0003DMG400006975,Novel02920,PGSC0003DMG400022186,PGSC0003DMG400021862,PGSC0003DMG400010170,PGSC0003DMG400008840,PGSC0003DMG400008839,PGSC0003DMG400003618,PGSC0003DMG400011330,PGSC0003DMG400020215,PGSC0003DMG400007001
GO:0022832	voltage-gated channel activity	molecular_function	0.13052	1	12	2387	97	29181	PGSC0003DMG400008839,PGSC0003DMG400008840,PGSC0003DMG400007001,PGSC0003DMG400003618,PGSC0003DMG400020215,PGSC0003DMG400011330,PGSC0003DMG400021862,PGSC0003DMG400022186,Novel02920,PGSC0003DMG400018811,PGSC0003DMG400006975,PGSC0003DMG400010170
GO:0006139	nucleobase-containing compound metabolic process	biological_process	0.13099	1	703	2387	7991	29181	PGSC0003DMG400000180,PGSC0003DMG400003522,Novel01267,PGSC0003DMG400025975,PGSC0003DMG400003964,PGSC0003DMG402008019,PGSC0003DMG400024266,PGSC0003DMG400020172,PGSC0003DMG400004942,PGSC0003DMG400024701,PGSC0003DMG400024487,PGSC0003DMG400032558,PGSC0003DMG400026364,PGSC0003DMG400021629,PGSC0003DMG402027248,PGSC0003DMG400003035,PGSC0003DMG400031213,PGSC0003DMG400004087,PGSC0003DMG402014864,PGSC0003DM…
GO:0022857	transmembrane transporter activity	molecular_function	0.13198	1	226	2387	2427	29181	Novel00688,PGSC0003DMG400026534,Novel03519,PGSC0003DMG400007358,PGSC0003DMG400016459,PGSC0003DMG400001123,PGSC0003DMG400005178,PGSC0003DMG402026306,PGSC0003DMG401027166,PGSC0003DMG400000615,PGSC0003DMG400010619,PGSC0003DMG400000367,PGSC0003DMG400027061,PGSC0003DMG400013106,PGSC0003DMG400012425,Novel02242,PGSC0003DMG400012486,PGSC0003DMG400003319,PGSC0003DMG400025519,PGSC0003DMG400007001,PGSC0003D…
GO:0017111	nucleoside-triphosphatase activity	molecular_function	0.13221	1	159	2387	1605	29181	PGSC0003DMG400018116,PGSC0003DMG402002262,PGSC0003DMG400020172,PGSC0003DMG400009404,PGSC0003DMG400002183,PGSC0003DMG400006846,PGSC0003DMG400021343,PGSC0003DMG400013523,Novel01267,PGSC0003DMG403026842,PGSC0003DMG402029631,PGSC0003DMG400004750,Novel02118,PGSC0003DMG400008801,Novel00622,PGSC0003DMG402014864,PGSC0003DMG400010157,PGSC0003DMG400014875,PGSC0003DMG400008871,PGSC0003DMG400011264,PGSC0003D…
GO:0008378	galactosyltransferase activity	molecular_function	0.13232	1	7	2387	46	29181	Novel03161,PGSC0003DMG400033031,PGSC0003DMG400029547,PGSC0003DMG401012430,PGSC0003DMG400002423,PGSC0003DMG400018405,PGSC0003DMG400027791
GO:0004743	pyruvate kinase activity	molecular_function	0.13271	1	3	2387	14	29181	PGSC0003DMG400024220,PGSC0003DMG400010913,PGSC0003DMG400027321
GO:0048583	regulation of response to stimulus	biological_process	0.13325	1	36	2387	343	29181	PGSC0003DMG400027204,PGSC0003DMG400012554,PGSC0003DMG400008259,PGSC0003DMG402023851,PGSC0003DMG400030663,Novel00308,PGSC0003DMG400024508,PGSC0003DMG400016820,PGSC0003DMG400022157,PGSC0003DMG400028924,PGSC0003DMG400024953,Novel02038,PGSC0003DMG400020170,PGSC0003DMG400015253,PGSC0003DMG400020089,PGSC0003DMG400032118,Novel02306,PGSC0003DMG400031007,PGSC0003DMG401010047,PGSC0003DMG400028276,PGSC0003D…
GO:0044238	primary metabolic process	biological_process	0.13341	1	1222	2387	13934	29181	PGSC0003DMG400012160,PGSC0003DMG400024971,PGSC0003DMG402000306,PGSC0003DMG400023966,PGSC0003DMG400010619,PGSC0003DMG400002021,Novel01290,PGSC0003DMG400021341,PGSC0003DMG400018533,PGSC0003DMG402019176,PGSC0003DMG400017528,PGSC0003DMG400015241,PGSC0003DMG400000367,PGSC0003DMG400016450,PGSC0003DMG400004162,PGSC0003DMG400008477,PGSC0003DMG400021083,PGSC0003DMG400001246,PGSC0003DMG400014974,PGSC0003DM…
GO:0003726	double-stranded RNA adenosine deaminase activity	molecular_function	0.13391	1	2	2387	8	29181	PGSC0003DMG400024915,PGSC0003DMG400015281
GO:0004866	endopeptidase inhibitor activity	molecular_function	0.13413	1	21	2387	225	29181	PGSC0003DMG400010139,PGSC0003DMG400010145,PGSC0003DMG400022691,PGSC0003DMG400029723,PGSC0003DMG400016284,PGSC0003DMG400010132,Novel02920,PGSC0003DMG400018107,PGSC0003DMG400019574,PGSC0003DMG400017928,PGSC0003DMG400004496,PGSC0003DMG400007667,PGSC0003DMG400005455,PGSC0003DMG401001531,PGSC0003DMG400010438,PGSC0003DMG400026916,Novel03510,PGSC0003DMG400029086,PGSC0003DMG400010143,PGSC0003DMG400010170…
GO:0061135	endopeptidase regulator activity	molecular_function	0.13413	1	21	2387	225	29181	PGSC0003DMG400010139,PGSC0003DMG400010145,PGSC0003DMG400029723,PGSC0003DMG400022691,PGSC0003DMG400016284,PGSC0003DMG400010132,Novel02920,PGSC0003DMG400018107,PGSC0003DMG400019574,PGSC0003DMG400004496,PGSC0003DMG400017928,PGSC0003DMG400007667,PGSC0003DMG400005455,PGSC0003DMG401001531,PGSC0003DMG400010438,PGSC0003DMG400026916,PGSC0003DMG400029086,Novel03510,PGSC0003DMG400010170,PGSC0003DMG400010143…
GO:0009117	nucleotide metabolic process	biological_process	0.13466	1	70	2387	719	29181	PGSC0003DMG402019176,PGSC0003DMG400019734,PGSC0003DMG400021199,PGSC0003DMG400021341,PGSC0003DMG400025519,PGSC0003DMG400013106,PGSC0003DMG402004751,PGSC0003DMG400030714,PGSC0003DMG400016820,PGSC0003DMG400005926,PGSC0003DMG400007092,PGSC0003DMG400000367,PGSC0003DMG400009353,PGSC0003DMG400026643,PGSC0003DMG400024914,PGSC0003DMG402026306,PGSC0003DMG401027166,PGSC0003DMG400035389,PGSC0003DMG400013550,…
GO:0032259	methylation	biological_process	0.13517	1	25	2387	226	29181	PGSC0003DMG402029795,PGSC0003DMG400002773,PGSC0003DMG400000343,PGSC0003DMG401025427,PGSC0003DMG401003285,PGSC0003DMG400018107,PGSC0003DMG400017552,PGSC0003DMG400022346,PGSC0003DMG400009321,PGSC0003DMG400021659,PGSC0003DMG400015226,PGSC0003DMG400003614,Novel03182,PGSC0003DMG400010119,PGSC0003DMG400013424,PGSC0003DMG402002262,Novel01584,PGSC0003DMG402002977,PGSC0003DMG400004710,PGSC0003DMG400032269…
GO:0005102	receptor binding	molecular_function	0.13545	1	90	2387	963	29181	PGSC0003DMG400000646,PGSC0003DMG400007092,PGSC0003DMG400017440,Novel00308,PGSC0003DMG400021407,PGSC0003DMG400025797,PGSC0003DMG400030843,PGSC0003DMG400020520,PGSC0003DMG400032166,PGSC0003DMG400025519,PGSC0003DMG400007001,PGSC0003DMG400004243,PGSC0003DMG400031130,PGSC0003DMG400011624,PGSC0003DMG400016459,PGSC0003DMG400025545,PGSC0003DMG402026306,PGSC0003DMG401023104,PGSC0003DMG400026428,PGSC0003DM…
GO:0005283	sodium:amino acid symporter activity	molecular_function	0.1355	1	2	2387	7	29181	PGSC0003DMG400030519,PGSC0003DMG400004061
GO:0005416	cation:amino acid symporter activity	molecular_function	0.1355	1	2	2387	7	29181	PGSC0003DMG400030519,PGSC0003DMG400004061
GO:0009628	response to abiotic stimulus	biological_process	0.1357	1	10	2387	78	29181	Novel01891,PGSC0003DMG400025752,Novel03396,PGSC0003DMG400027594,PGSC0003DMG400021789,PGSC0003DMG400015766,PGSC0003DMG400020541,PGSC0003DMG400025519,PGSC0003DMG400003072,PGSC0003DMG400041458
GO:0006821	chloride transport	biological_process	0.13642	1	5	2387	30	29181	PGSC0003DMG400021862,PGSC0003DMG400022186,PGSC0003DMG400006975,PGSC0003DMG400011330,PGSC0003DMG400020215
GO:0022892	substrate-specific transporter activity	molecular_function	0.13692	1	194	2387	2116	29181	PGSC0003DMG400018781,PGSC0003DMG401029267,PGSC0003DMG400020249,PGSC0003DMG400005828,PGSC0003DMG401019957,PGSC0003DMG400017572,PGSC0003DMG400016892,PGSC0003DMG401020784,PGSC0003DMG400006975,Novel02258,PGSC0003DMG400030425,PGSC0003DMG400025968,PGSC0003DMG400020740,PGSC0003DMG400007498,PGSC0003DMG402009663,PGSC0003DMG400011089,PGSC0003DMG400001391,PGSC0003DMG400010866,PGSC0003DMG400012523,PGSC0003DM…
GO:0009877	nodulation	biological_process	0.13753	1	9	2387	72	29181	PGSC0003DMG400003614,Novel03182,PGSC0003DMG400006829,PGSC0003DMG400002773,PGSC0003DMG400002021,PGSC0003DMG400032180,PGSC0003DMG400020785,PGSC0003DMG400013186,PGSC0003DMG400004980
GO:0006006	glucose metabolic process	biological_process	0.13777	1	9	2387	68	29181	PGSC0003DMG400014944,PGSC0003DMG400010413,PGSC0003DMG400015392,PGSC0003DMG400027925,PGSC0003DMG400024701,PGSC0003DMG400017394,PGSC0003DMG401025427,PGSC0003DMG400015766,PGSC0003DMG400008871
GO:0005262	calcium channel activity	molecular_function	0.13834	1	11	2387	97	29181	PGSC0003DMG400009085,PGSC0003DMG400026534,PGSC0003DMG400010170,PGSC0003DMG400008840,PGSC0003DMG400005638,Novel01525,PGSC0003DMG400008839,PGSC0003DMG400003632,PGSC0003DMG400005154,PGSC0003DMG400006327,PGSC0003DMG401029997
GO:0045595	regulation of cell differentiation	biological_process	0.13879	1	5	2387	30	29181	PGSC0003DMG402024549,PGSC0003DMG400027323,PGSC0003DMG400021255,PGSC0003DMG400028578,PGSC0003DMG400001544
GO:0006566	threonine metabolic process	biological_process	0.13892	1	2	2387	7	29181	PGSC0003DMG400031029,PGSC0003DMG400030017
GO:0009088	threonine biosynthetic process	biological_process	0.13892	1	2	2387	7	29181	PGSC0003DMG400030017,PGSC0003DMG400031029
GO:0004872	receptor activity	molecular_function	0.14055	1	53	2387	510	29181	PGSC0003DMG400009867,PGSC0003DMG400029165,PGSC0003DMG400032154,Novel03299,PGSC0003DMG400023402,PGSC0003DMG400024266,PGSC0003DMG400011479,PGSC0003DMG400031819,PGSC0003DMG400002564,PGSC0003DMG400029473,PGSC0003DMG400003072,PGSC0003DMG400027438,PGSC0003DMG400006086,PGSC0003DMG400009914,PGSC0003DMG400025245,PGSC0003DMG400022420,PGSC0003DMG400015766,Novel01267,PGSC0003DMG400004233,PGSC0003DMG401002548…
GO:0008176	tRNA (guanine-N7-)-methyltransferase activity	molecular_function	0.14089	1	6	2387	39	29181	PGSC0003DMG400003882,PGSC0003DMG400003614,Novel03182,PGSC0003DMG400023836,PGSC0003DMG402032565,PGSC0003DMG400021659
GO:2000112	regulation of cellular macromolecule biosynthetic process	biological_process	0.14133	1	339	2387	3745	29181	PGSC0003DMG400031337,PGSC0003DMG402031196,PGSC0003DMG400034289,Novel00207,PGSC0003DMG400017334,PGSC0003DMG400031415,PGSC0003DMG400030425,PGSC0003DMG400028826,PGSC0003DMG400018693,PGSC0003DMG400022209,PGSC0003DMG401020784,PGSC0003DMG400001350,PGSC0003DMG400014302,PGSC0003DMG400003503,PGSC0003DMG400012305,PGSC0003DMG400000064,PGSC0003DMG400012795,PGSC0003DMG402008032,PGSC0003DMG402012933,PGSC0003DM…
GO:0030154	cell differentiation	biological_process	0.14194	1	30	2387	282	29181	PGSC0003DMG402009663,PGSC0003DMG400013949,PGSC0003DMG400001544,PGSC0003DMG400023636,PGSC0003DMG400021255,PGSC0003DMG400027323,PGSC0003DMG400016465,PGSC0003DMG400002231,PGSC0003DMG400028578,PGSC0003DMG400021659,PGSC0003DMG400016389,PGSC0003DMG400000394,PGSC0003DMG400030663,PGSC0003DMG400016544,PGSC0003DMG400010413,PGSC0003DMG400010041,PGSC0003DMG400011801,PGSC0003DMG400019615,PGSC0003DMG400005904,…
GO:0016762	xyloglucan:xyloglucosyl transferase activity	molecular_function	0.14267	1	6	2387	45	29181	PGSC0003DMG400004109,PGSC0003DMG400000932,PGSC0003DMG402010181,PGSC0003DMG400000408,PGSC0003DMG400029503,Novel01290
GO:0048046	apoplast	cellular_component	0.14267	1	6	2387	45	29181	Novel01290,PGSC0003DMG400029503,PGSC0003DMG402010181,PGSC0003DMG400000408,PGSC0003DMG400000932,PGSC0003DMG400004109
GO:0009889	regulation of biosynthetic process	biological_process	0.14376	1	341	2387	3771	29181	PGSC0003DMG400007408,PGSC0003DMG400027594,PGSC0003DMG400025751,PGSC0003DMG400019824,PGSC0003DMG400001434,PGSC0003DMG400006026,PGSC0003DMG402009663,PGSC0003DMG400005991,PGSC0003DMG402032501,PGSC0003DMG400002627,PGSC0003DMG400023341,PGSC0003DMG400020317,PGSC0003DMG400016892,PGSC0003DMG402002635,PGSC0003DMG400022027,PGSC0003DMG400019693,PGSC0003DMG402019457,PGSC0003DMG400007678,PGSC0003DMG400015549,…
GO:0004683	calmodulin-dependent protein kinase activity	molecular_function	0.14387	1	2	2387	8	29181	PGSC0003DMG400032509,PGSC0003DMG400019135
GO:0015232	heme transporter activity	molecular_function	0.14444	1	5	2387	34	29181	PGSC0003DMG400003777,PGSC0003DMG400003807,PGSC0003DMG400023478,PGSC0003DMG400019253,PGSC0003DMG400017751
GO:0007530	sex determination	biological_process	0.1447	1	3	2387	16	29181	PGSC0003DMG402009663,PGSC0003DMG400003581,PGSC0003DMG400021659
GO:0007531	mating type determination	biological_process	0.1447	1	3	2387	16	29181	PGSC0003DMG402009663,PGSC0003DMG400003581,PGSC0003DMG400021659
GO:0045165	cell fate commitment	biological_process	0.1447	1	3	2387	16	29181	PGSC0003DMG400003581,PGSC0003DMG400021659,PGSC0003DMG402009663
GO:0009581	detection of external stimulus	biological_process	0.14529	1	4	2387	21	29181	PGSC0003DMG400003072,PGSC0003DMG400041458,PGSC0003DMG400015766,Novel01891
GO:0009582	detection of abiotic stimulus	biological_process	0.14529	1	4	2387	21	29181	Novel01891,PGSC0003DMG400015766,PGSC0003DMG400003072,PGSC0003DMG400041458
GO:0009583	detection of light stimulus	biological_process	0.14529	1	4	2387	21	29181	PGSC0003DMG400015766,Novel01891,PGSC0003DMG400041458,PGSC0003DMG400003072
GO:0009404	toxin metabolic process	biological_process	0.14559	1	11	2387	93	29181	PGSC0003DMG401013333,PGSC0003DMG400028752,PGSC0003DMG400000881,PGSC0003DMG400021177,PGSC0003DMG400024109,PGSC0003DMG400000209,PGSC0003DMG400003381,PGSC0003DMG400003073,PGSC0003DMG400001464,PGSC0003DMG400029473,PGSC0003DMG401028577
GO:0015291	secondary active transmembrane transporter activity	molecular_function	0.14597	1	27	2387	241	29181	PGSC0003DMG400027061,PGSC0003DMG400023402,PGSC0003DMG400030519,Novel00777,PGSC0003DMG400024357,PGSC0003DMG400015447,PGSC0003DMG400025433,PGSC0003DMG400005009,Novel03303,PGSC0003DMG400000209,PGSC0003DMG400004061,PGSC0003DMG400012523,PGSC0003DMG400005301,PGSC0003DMG400001391,PGSC0003DMG400002132,PGSC0003DMG400003411,PGSC0003DMG400017751,PGSC0003DMG400024336,PGSC0003DMG400031029,PGSC0003DMG400007358…
GO:0004838	L-tyrosine:2-oxoglutarate aminotransferase activity	molecular_function	0.14598	1	2	2387	7	29181	PGSC0003DMG400005361,PGSC0003DMG401002654
GO:0070547	L-tyrosine aminotransferase activity	molecular_function	0.14598	1	2	2387	7	29181	PGSC0003DMG400005361,PGSC0003DMG401002654
GO:0015098	molybdate ion transmembrane transporter activity	molecular_function	0.14641	1	5	2387	29	29181	PGSC0003DMG400009994,PGSC0003DMG400011000,PGSC0003DMG400015470,PGSC0003DMG400012239,PGSC0003DMG402028252
GO:0015689	molybdate ion transport	biological_process	0.14641	1	5	2387	29	29181	PGSC0003DMG400015470,PGSC0003DMG400011000,PGSC0003DMG400009994,PGSC0003DMG400012239,PGSC0003DMG402028252
GO:0005451	monovalent cation:proton antiporter activity	molecular_function	0.14746	1	4	2387	24	29181	PGSC0003DMG400027061,PGSC0003DMG400024336,PGSC0003DMG400022604,PGSC0003DMG400005301
GO:0015491	cation:cation antiporter activity	molecular_function	0.14746	1	4	2387	24	29181	PGSC0003DMG400022604,PGSC0003DMG400005301,PGSC0003DMG400024336,PGSC0003DMG400027061
GO:0000166	nucleotide binding	molecular_function	0.14754	1	499	2387	5188	29181	PGSC0003DMG400001123,PGSC0003DMG400001981,PGSC0003DMG401025427,PGSC0003DMG400031271,PGSC0003DMG400007992,PGSC0003DMG401019239,PGSC0003DMG400021421,PGSC0003DMG400028752,PGSC0003DMG400015546,PGSC0003DMG400003465,PGSC0003DMG400012701,Novel01656,PGSC0003DMG400009571,PGSC0003DMG400025028,PGSC0003DMG400010619,PGSC0003DMG400021168,PGSC0003DMG402004423,Novel00463,PGSC0003DMG400012425,Novel02589,PGSC0003D…
GO:1901265	nucleoside phosphate binding	molecular_function	0.14754	1	499	2387	5188	29181	PGSC0003DMG400022893,PGSC0003DMG400002537,PGSC0003DMG401018599,PGSC0003DMG400030519,PGSC0003DMG400004415,PGSC0003DMG400020422,PGSC0003DMG400015330,PGSC0003DMG400026156,PGSC0003DMG400027204,PGSC0003DMG400011777,PGSC0003DMG400021804,PGSC0003DMG400017211,PGSC0003DMG400005335,PGSC0003DMG402029267,Novel00273,PGSC0003DMG400007963,PGSC0003DMG400003625,Novel01235,PGSC0003DMG400011414,PGSC0003DMG400027744…
GO:0022891	substrate-specific transmembrane transporter activity	molecular_function	0.1478	1	180	2387	1957	29181	PGSC0003DMG402006035,Novel00273,PGSC0003DMG400007963,PGSC0003DMG400024220,PGSC0003DMG400022893,PGSC0003DMG400005301,Novel01525,PGSC0003DMG400013857,PGSC0003DMG400030519,PGSC0003DMG402007034,PGSC0003DMG400026156,Novel03303,PGSC0003DMG400000209,PGSC0003DMG400016997,PGSC0003DMG400032104,PGSC0003DMG400028924,PGSC0003DMG402029307,PGSC0003DMG400024953,PGSC0003DMG400020136,PGSC0003DMG400017581,PGSC0003D…
GO:0022411	cellular component disassembly	biological_process	0.14807	1	15	2387	128	29181	PGSC0003DMG400031271,PGSC0003DMG402005733,PGSC0003DMG400015194,PGSC0003DMG400028345,PGSC0003DMG400011222,PGSC0003DMG400003882,PGSC0003DMG400008719,Novel01234,PGSC0003DMG400030017,PGSC0003DMG400031029,PGSC0003DMG400015549,PGSC0003DMG400012711,PGSC0003DMG400030519,PGSC0003DMG400023478,PGSC0003DMG400028158
GO:0000003	reproduction	biological_process	0.14845	1	53	2387	556	29181	PGSC0003DMG400002021,PGSC0003DMG400001378,PGSC0003DMG400000836,PGSC0003DMG401024930,PGSC0003DMG400012653,PGSC0003DMG400027854,PGSC0003DMG401009663,PGSC0003DMG400002231,PGSC0003DMG400013550,Novel03379,PGSC0003DMG400029546,PGSC0003DMG400017440,PGSC0003DMG400016544,PGSC0003DMG400007092,PGSC0003DMG400004704,PGSC0003DMG400022299,PGSC0003DMG400027002,PGSC0003DMG400022061,PGSC0003DMG400032166,PGSC0003DM…
GO:0015144	carbohydrate transmembrane transporter activity	molecular_function	0.14849	1	13	2387	117	29181	PGSC0003DMG400019514,PGSC0003DMG400023402,PGSC0003DMG400017751,PGSC0003DMG400027858,PGSC0003DMG400009730,PGSC0003DMG400009085,Novel03303,PGSC0003DMG400017572,PGSC0003DMG400000209,PGSC0003DMG400009290,PGSC0003DMG400002132,PGSC0003DMG400018781,PGSC0003DMG400012523
GO:1901476	carbohydrate transporter activity	molecular_function	0.14849	1	13	2387	117	29181	PGSC0003DMG400027858,PGSC0003DMG400009085,PGSC0003DMG400009730,PGSC0003DMG400023402,PGSC0003DMG400019514,PGSC0003DMG400017751,PGSC0003DMG400002132,PGSC0003DMG400018781,PGSC0003DMG400012523,PGSC0003DMG400000209,PGSC0003DMG400017572,Novel03303,PGSC0003DMG400009290
GO:1901988	negative regulation of cell cycle phase transition	biological_process	0.14892	1	6	2387	43	29181	PGSC0003DMG400023478,PGSC0003DMG400022061,PGSC0003DMG400019455,PGSC0003DMG400022209,PGSC0003DMG400008931,PGSC0003DMG402013013
GO:1901991	negative regulation of mitotic cell cycle phase transition	biological_process	0.14892	1	6	2387	43	29181	PGSC0003DMG400019455,PGSC0003DMG400023478,PGSC0003DMG400022061,PGSC0003DMG402013013,PGSC0003DMG400022209,PGSC0003DMG400008931
GO:0010556	regulation of macromolecule biosynthetic process	biological_process	0.14917	1	340	2387	3764	29181	Novel02569,PGSC0003DMG400003536,PGSC0003DMG400006801,PGSC0003DMG400026821,PGSC0003DMG402029795,PGSC0003DMG400017116,Novel01891,PGSC0003DMG400001544,PGSC0003DMG400010897,PGSC0003DMG400004149,PGSC0003DMG400009353,PGSC0003DMG400011824,Novel01529,PGSC0003DMG400001960,PGSC0003DMG400027167,PGSC0003DMG400020086,PGSC0003DMG400018234,PGSC0003DMG400016019,PGSC0003DMG400017485,PGSC0003DMG400020541,PGSC0003D…
GO:0031326	regulation of cellular biosynthetic process	biological_process	0.14917	1	340	2387	3764	29181	PGSC0003DMG400013693,PGSC0003DMG400022551,PGSC0003DMG400020541,PGSC0003DMG400017485,PGSC0003DMG400018234,PGSC0003DMG400016019,PGSC0003DMG400027167,PGSC0003DMG400020086,PGSC0003DMG400001960,Novel01529,PGSC0003DMG400004149,PGSC0003DMG400010897,PGSC0003DMG400009353,PGSC0003DMG400011824,PGSC0003DMG400001544,PGSC0003DMG402029795,PGSC0003DMG400017116,Novel01891,PGSC0003DMG400003536,PGSC0003DMG400026821…
GO:0004764	shikimate 3-dehydrogenase (NADP+) activity	molecular_function	0.1493	1	2	2387	8	29181	PGSC0003DMG401011206,PGSC0003DMG400011824
GO:0060089	molecular transducer activity	molecular_function	0.14957	1	75	2387	756	29181	PGSC0003DMG400003078,PGSC0003DMG400004233,PGSC0003DMG400003503,PGSC0003DMG400002564,PGSC0003DMG400021409,PGSC0003DMG400016822,PGSC0003DMG400031819,PGSC0003DMG400007496,PGSC0003DMG400029165,PGSC0003DMG400001805,PGSC0003DMG400026518,PGSC0003DMG400011330,PGSC0003DMG400026403,PGSC0003DMG401002548,PGSC0003DMG402005733,PGSC0003DMG400018939,PGSC0003DMG400003319,Novel02622,PGSC0003DMG400025519,PGSC0003DM…
GO:0042601	endospore-forming forespore	cellular_component	0.14969	1	3	2387	15	29181	PGSC0003DMG400027002,PGSC0003DMG400026989,PGSC0003DMG400012653
GO:0042763	intracellular immature spore	cellular_component	0.14969	1	3	2387	15	29181	PGSC0003DMG400026989,PGSC0003DMG400027002,PGSC0003DMG400012653
GO:0016758	transferase activity, transferring hexosyl groups	molecular_function	0.15018	1	81	2387	801	29181	PGSC0003DMG400033932,PGSC0003DMG400015327,PGSC0003DMG402010181,PGSC0003DMG400002423,PGSC0003DMG400006829,PGSC0003DMG400008328,PGSC0003DMG402000674,PGSC0003DMG400017768,PGSC0003DMG400028981,PGSC0003DMG400031765,PGSC0003DMG401012430,PGSC0003DMG400029447,PGSC0003DMG400016611,PGSC0003DMG400018584,PGSC0003DMG400044149,PGSC0003DMG400016589,PGSC0003DMG400035689,Novel00097,PGSC0003DMG400005828,PGSC0003DM…
GO:0019222	regulation of metabolic process	biological_process	0.15047	1	379	2387	4223	29181	PGSC0003DMG400014444,PGSC0003DMG400013016,PGSC0003DMG401003154,PGSC0003DMG400030322,PGSC0003DMG400002757,Novel01584,PGSC0003DMG400015225,PGSC0003DMG400010677,PGSC0003DMG400031375,PGSC0003DMG400004567,PGSC0003DMG400009103,PGSC0003DMG400015766,Novel01118,PGSC0003DMG400025320,PGSC0003DMG400013401,PGSC0003DMG400024267,PGSC0003DMG400030246,PGSC0003DMG400024571,PGSC0003DMG400039300,Novel02713,PGSC0003D…
GO:0030414	peptidase inhibitor activity	molecular_function	0.15055	1	22	2387	238	29181	PGSC0003DMG400010139,PGSC0003DMG400010145,PGSC0003DMG400029723,PGSC0003DMG400022691,PGSC0003DMG400016284,PGSC0003DMG400018107,Novel02783,PGSC0003DMG400010132,Novel02920,PGSC0003DMG400019574,PGSC0003DMG400004496,PGSC0003DMG400017928,PGSC0003DMG400007667,PGSC0003DMG400010438,PGSC0003DMG401001531,PGSC0003DMG400005455,PGSC0003DMG400029086,Novel03510,PGSC0003DMG400026916,PGSC0003DMG400025488,PGSC0003D…
GO:0061134	peptidase regulator activity	molecular_function	0.15055	1	22	2387	238	29181	PGSC0003DMG400017928,PGSC0003DMG400004496,PGSC0003DMG400018107,PGSC0003DMG400010132,Novel02783,Novel02920,PGSC0003DMG400019574,PGSC0003DMG400010145,PGSC0003DMG400029723,PGSC0003DMG400022691,PGSC0003DMG400016284,PGSC0003DMG400010139,PGSC0003DMG400025488,PGSC0003DMG400010170,PGSC0003DMG400010143,PGSC0003DMG400029086,Novel03510,PGSC0003DMG400026916,PGSC0003DMG400010438,PGSC0003DMG401001531,PGSC0003D…
GO:0000266	mitochondrial fission	biological_process	0.15373	1	2	2387	9	29181	PGSC0003DMG400015601,PGSC0003DMG400019763
GO:0031400	negative regulation of protein modification process	biological_process	0.15438	1	7	2387	51	29181	PGSC0003DMG402013013,PGSC0003DMG400022209,PGSC0003DMG400008931,PGSC0003DMG401007235,PGSC0003DMG400019455,PGSC0003DMG400022061,PGSC0003DMG400023478
GO:0002694	regulation of leukocyte activation	biological_process	0.15471	1	2	2387	7	29181	PGSC0003DMG400025700,PGSC0003DMG400003319
GO:0050865	regulation of cell activation	biological_process	0.15471	1	2	2387	7	29181	PGSC0003DMG400025700,PGSC0003DMG400003319
GO:0051249	regulation of lymphocyte activation	biological_process	0.15471	1	2	2387	7	29181	PGSC0003DMG400025700,PGSC0003DMG400003319
GO:0009101	glycoprotein biosynthetic process	biological_process	0.15762	1	17	2387	146	29181	PGSC0003DMG400018405,PGSC0003DMG400002423,PGSC0003DMG400011479,PGSC0003DMG400002359,Novel03161,PGSC0003DMG400012635,PGSC0003DMG402000674,PGSC0003DMG400003073,PGSC0003DMG401012430,PGSC0003DMG400005216,PGSC0003DMG400003522,PGSC0003DMG400025194,PGSC0003DMG400000588,PGSC0003DMG400030897,PGSC0003DMG400029547,PGSC0003DMG400033031,PGSC0003DMG400027791
GO:0015296	anion:cation symporter activity	molecular_function	0.15852	1	3	2387	17	29181	PGSC0003DMG400030519,PGSC0003DMG400012523,PGSC0003DMG400004061
GO:0009119	ribonucleoside metabolic process	biological_process	0.15939	1	54	2387	554	29181	PGSC0003DMG400030714,PGSC0003DMG400013106,PGSC0003DMG400010913,PGSC0003DMG400030838,PGSC0003DMG400000367,PGSC0003DMG400007092,PGSC0003DMG400005926,PGSC0003DMG400024220,PGSC0003DMG400016820,PGSC0003DMG401000923,PGSC0003DMG400022893,PGSC0003DMG400013857,PGSC0003DMG402019176,PGSC0003DMG400019734,PGSC0003DMG402027860,PGSC0003DMG400021607,PGSC0003DMG400025519,PGSC0003DMG400014217,PGSC0003DMG400029615,…
GO:0008514	organic anion transmembrane transporter activity	molecular_function	0.1601	1	13	2387	108	29181	PGSC0003DMG400024609,Novel00688,PGSC0003DMG400001391,PGSC0003DMG400010866,PGSC0003DMG400012523,PGSC0003DMG400004061,PGSC0003DMG400010438,PGSC0003DMG400030519,PGSC0003DMG400024357,Novel03229,PGSC0003DMG400005455,PGSC0003DMG400009290,PGSC0003DMG400005612
GO:0032780	negative regulation of ATPase activity	biological_process	0.16042	1	2	2387	11	29181	PGSC0003DMG400000292,PGSC0003DMG402008019
GO:0070070	proton-transporting V-type ATPase complex assembly	biological_process	0.16192	1	4	2387	28	29181	PGSC0003DMG400019398,PGSC0003DMG400017474,PGSC0003DMG401026931,PGSC0003DMG400026185
GO:0070072	vacuolar proton-transporting V-type ATPase complex assembly	biological_process	0.16192	1	4	2387	28	29181	PGSC0003DMG400019398,PGSC0003DMG401026931,PGSC0003DMG400026185,PGSC0003DMG400017474
GO:0016695	oxidoreductase activity, acting on hydrogen as donor	molecular_function	0.16193	1	3	2387	18	29181	PGSC0003DMG400021546,PGSC0003DMG400003807,PGSC0003DMG401002858
GO:0004068	aspartate 1-decarboxylase activity	molecular_function	0.16203	1	1	2387	3	29181	PGSC0003DMG402029257
GO:0006522	alanine metabolic process	biological_process	0.16203	1	1	2387	3	29181	PGSC0003DMG402029257
GO:0006523	alanine biosynthetic process	biological_process	0.16203	1	1	2387	3	29181	PGSC0003DMG402029257
GO:0009078	pyruvate family amino acid metabolic process	biological_process	0.16203	1	1	2387	3	29181	PGSC0003DMG402029257
GO:0009079	pyruvate family amino acid biosynthetic process	biological_process	0.16203	1	1	2387	3	29181	PGSC0003DMG402029257
GO:0003995	acyl-CoA dehydrogenase activity	molecular_function	0.16318	1	4	2387	22	29181	PGSC0003DMG400006846,PGSC0003DMG400027192,PGSC0003DMG400023436,PGSC0003DMG400020620
GO:0006099	tricarboxylic acid cycle	biological_process	0.16359	1	6	2387	40	29181	PGSC0003DMG400020422,PGSC0003DMG400003078,PGSC0003DMG402021921,PGSC0003DMG400042507,PGSC0003DMG402007138,PGSC0003DMG400030843
GO:0006101	citrate metabolic process	biological_process	0.16359	1	6	2387	40	29181	PGSC0003DMG402021921,PGSC0003DMG400030843,PGSC0003DMG400042507,PGSC0003DMG402007138,PGSC0003DMG400020422,PGSC0003DMG400003078
GO:0005136	interleukin-4 receptor binding	molecular_function	0.1636	1	2	2387	8	29181	PGSC0003DMG400023478,PGSC0003DMG400020520
GO:0000150	recombinase activity	molecular_function	0.16373	1	5	2387	34	29181	PGSC0003DMG400032792,PGSC0003DMG400030519,Novel01111,PGSC0003DMG402032501,PGSC0003DMG400011645
GO:0009112	nucleobase metabolic process	biological_process	0.16376	1	5	2387	34	29181	PGSC0003DMG400008882,PGSC0003DMG400019620,PGSC0003DMG400007169,PGSC0003DMG400024886,PGSC0003DMG400023754
GO:0046112	nucleobase biosynthetic process	biological_process	0.16376	1	5	2387	34	29181	PGSC0003DMG400007169,PGSC0003DMG400019620,PGSC0003DMG400024886,PGSC0003DMG400023754,PGSC0003DMG400008882
GO:0008152	metabolic process	biological_process	0.16414	1	1502	2387	17416	29181	PGSC0003DMG400021311,PGSC0003DMG400041450,PGSC0003DMG400025395,PGSC0003DMG402015684,PGSC0003DMG400010401,PGSC0003DMG400040684,PGSC0003DMG402010181,PGSC0003DMG400017157,PGSC0003DMG400018752,PGSC0003DMG400027803,PGSC0003DMG400000204,PGSC0003DMG400005754,Novel00097,PGSC0003DMG403019589,PGSC0003DMG400014430,PGSC0003DMG400023636,PGSC0003DMG400020619,PGSC0003DMG400023171,PGSC0003DMG400015608,PGSC0003DM…
GO:0005921	gap junction	cellular_component	0.16414	1	2	2387	9	29181	PGSC0003DMG400027328,PGSC0003DMG400026211
GO:0048309	endoplasmic reticulum inheritance	biological_process	0.16432	1	6	2387	44	29181	PGSC0003DMG400011359,PGSC0003DMG400000498,PGSC0003DMG400022061,PGSC0003DMG400017655,PGSC0003DMG400027534,PGSC0003DMG400000434
GO:0015931	nucleobase-containing compound transport	biological_process	0.16495	1	17	2387	157	29181	PGSC0003DMG400022061,PGSC0003DMG400027534,PGSC0003DMG400011359,PGSC0003DMG400003111,PGSC0003DMG400000434,PGSC0003DMG400003103,PGSC0003DMG400000498,PGSC0003DMG400004162,PGSC0003DMG400005799,PGSC0003DMG400019466,PGSC0003DMG400019455,PGSC0003DMG400017743,PGSC0003DMG400017581,PGSC0003DMG400011089,PGSC0003DMG400028320,PGSC0003DMG400007012,PGSC0003DMG400017655
GO:1901981	phosphatidylinositol phosphate binding	molecular_function	0.16525	1	2	2387	8	29181	PGSC0003DMG400023012,PGSC0003DMG402032565
GO:0022884	macromolecule transmembrane transporter activity	molecular_function	0.16537	1	6	2387	46	29181	PGSC0003DMG400019466,Novel00898,PGSC0003DMG400006726,PGSC0003DMG400009730,PGSC0003DMG400017581,PGSC0003DMG400007012
GO:0030515	snoRNA binding	molecular_function	0.1659	1	2	2387	9	29181	PGSC0003DMG400033569,PGSC0003DMG402029631
GO:0072588	box H/ACA RNP complex	cellular_component	0.1659	1	2	2387	9	29181	PGSC0003DMG402029631,PGSC0003DMG400033569
GO:0001522	pseudouridine synthesis	biological_process	0.16611	1	6	2387	44	29181	PGSC0003DMG400033569,PGSC0003DMG400009953,PGSC0003DMG400018364,PGSC0003DMG402029631,PGSC0003DMG400008366,PGSC0003DMG400002774
GO:0051606	detection of stimulus	biological_process	0.16615	1	4	2387	23	29181	PGSC0003DMG400015766,Novel01891,PGSC0003DMG400041458,PGSC0003DMG400003072
GO:0031323	regulation of cellular metabolic process	biological_process	0.16642	1	361	2387	4026	29181	PGSC0003DMG400001960,PGSC0003DMG400027167,PGSC0003DMG400020086,PGSC0003DMG400011824,PGSC0003DMG400009353,PGSC0003DMG400010897,PGSC0003DMG400004149,Novel01529,PGSC0003DMG400017116,Novel01891,PGSC0003DMG402029795,PGSC0003DMG400001544,PGSC0003DMG400019574,Novel02569,PGSC0003DMG400006801,PGSC0003DMG400026821,PGSC0003DMG400003536,PGSC0003DMG400020541,PGSC0003DMG400013693,PGSC0003DMG400022551,Novel0073…
GO:0046688	response to copper ion	biological_process	0.16721	1	2	2387	8	29181	PGSC0003DMG400014709,PGSC0003DMG400033566
GO:0006824	cobalt ion transport	biological_process	0.16785	1	2	2387	8	29181	PGSC0003DMG400032110,PGSC0003DMG400023636
GO:0015087	cobalt ion transmembrane transporter activity	molecular_function	0.16785	1	2	2387	8	29181	PGSC0003DMG400032110,PGSC0003DMG400023636
GO:0016462	pyrophosphatase activity	molecular_function	0.16966	1	161	2387	1646	29181	PGSC0003DMG401029267,PGSC0003DMG400019669,PGSC0003DMG401002242,PGSC0003DMG400018222,PGSC0003DMG402031196,PGSC0003DMG400022027,PGSC0003DMG400020249,PGSC0003DMG400030425,PGSC0003DMG400018693,Novel02258,PGSC0003DMG400012761,PGSC0003DMG400020740,PGSC0003DMG400021409,PGSC0003DMG400000311,PGSC0003DMG400003078,PGSC0003DMG400017061,PGSC0003DMG400025861,PGSC0003DMG400016822,Novel03074,PGSC0003DMG401013522…
GO:0008170	N-methyltransferase activity	molecular_function	0.16968	1	12	2387	100	29181	PGSC0003DMG400030849,PGSC0003DMG400000343,PGSC0003DMG400014268,Novel01584,PGSC0003DMG400003614,Novel03182,PGSC0003DMG402029795,PGSC0003DMG400017691,PGSC0003DMG400029625,PGSC0003DMG400027051,PGSC0003DMG400015378,PGSC0003DMG400022873
GO:0044699	single-organism process	biological_process	0.16985	1	1151	2387	13227	29181	PGSC0003DMG402000927,PGSC0003DMG400005673,PGSC0003DMG400013090,PGSC0003DMG400003540,PGSC0003DMG400020215,PGSC0003DMG400013142,PGSC0003DMG400000881,PGSC0003DMG400024490,PGSC0003DMG401001693,PGSC0003DMG400026430,PGSC0003DMG400004895,PGSC0003DMG401025427,PGSC0003DMG400030963,PGSC0003DMG400014779,PGSC0003DMG400008014,PGSC0003DMG400020962,PGSC0003DMG400007358,PGSC0003DMG400028752,PGSC0003DMG400012701,…
GO:0032984	macromolecular complex disassembly	biological_process	0.16986	1	14	2387	121	29181	PGSC0003DMG400003882,PGSC0003DMG400031029,Novel01234,PGSC0003DMG400015549,PGSC0003DMG400030017,PGSC0003DMG400008719,PGSC0003DMG402005733,PGSC0003DMG400031271,PGSC0003DMG400011222,PGSC0003DMG400015194,PGSC0003DMG400030519,PGSC0003DMG400028158,PGSC0003DMG400023478,PGSC0003DMG400012711
GO:0015643	toxic substance binding	molecular_function	0.17098	1	8	2387	62	29181	PGSC0003DMG400000209,PGSC0003DMG400003073,PGSC0003DMG401028577,PGSC0003DMG402029795,PGSC0003DMG400016852,PGSC0003DMG401013333,PGSC0003DMG400028752,PGSC0003DMG400021177
GO:0009399	nitrogen fixation	biological_process	0.1713	1	6	2387	42	29181	PGSC0003DMG400022417,PGSC0003DMG400025006,PGSC0003DMG400003821,PGSC0003DMG400021254,PGSC0003DMG400040510,PGSC0003DMG400012696
GO:0005794	Golgi apparatus	cellular_component	0.17142	1	25	2387	228	29181	PGSC0003DMG400002132,PGSC0003DMG401013540,PGSC0003DMG400001417,Novel03303,PGSC0003DMG400000209,PGSC0003DMG400023402,PGSC0003DMG400024205,PGSC0003DMG400029546,PGSC0003DMG400018781,PGSC0003DMG400041458,PGSC0003DMG400025065,PGSC0003DMG400020827,PGSC0003DMG400008571,PGSC0003DMG400005828,PGSC0003DMG400027344,PGSC0003DMG400000498,PGSC0003DMG400022381,PGSC0003DMG400017572,PGSC0003DMG401011206,PGSC0003DM…
GO:0071941	nitrogen cycle metabolic process	biological_process	0.17175	1	9	2387	67	29181	PGSC0003DMG400025006,PGSC0003DMG400000457,PGSC0003DMG400040510,PGSC0003DMG400030212,PGSC0003DMG400022417,PGSC0003DMG400003821,PGSC0003DMG400001246,PGSC0003DMG400021254,PGSC0003DMG400012696
GO:0016757	transferase activity, transferring glycosyl groups	molecular_function	0.17201	1	109	2387	1098	29181	PGSC0003DMG400015817,PGSC0003DMG400008181,PGSC0003DMG400018107,PGSC0003DMG400020895,PGSC0003DMG400033031,PGSC0003DMG400024571,PGSC0003DMG400029132,PGSC0003DMG400000408,PGSC0003DMG400025139,PGSC0003DMG400009072,PGSC0003DMG400034672,PGSC0003DMG400019124,PGSC0003DMG400045075,PGSC0003DMG400000932,PGSC0003DMG400020344,PGSC0003DMG400001396,PGSC0003DMG400017603,PGSC0003DMG400026493,PGSC0003DMG401019352,…
GO:0015886	heme transport	biological_process	0.17223	1	9	2387	74	29181	PGSC0003DMG400019253,PGSC0003DMG400025029,PGSC0003DMG400017751,PGSC0003DMG400003777,PGSC0003DMG400003807,PGSC0003DMG400023478,PGSC0003DMG400013457,PGSC0003DMG400000001,PGSC0003DMG400022893
GO:1901678	iron coordination entity transport	biological_process	0.17223	1	9	2387	74	29181	PGSC0003DMG400023478,PGSC0003DMG400000001,PGSC0003DMG400013457,PGSC0003DMG400022893,PGSC0003DMG400019253,PGSC0003DMG400025029,PGSC0003DMG400017751,PGSC0003DMG400003777,PGSC0003DMG400003807
GO:0032268	regulation of cellular protein metabolic process	biological_process	0.17288	1	37	2387	340	29181	PGSC0003DMG400019455,PGSC0003DMG400006026,PGSC0003DMG400018107,PGSC0003DMG400029364,PGSC0003DMG400022209,PGSC0003DMG400010438,PGSC0003DMG400023478,PGSC0003DMG400025847,PGSC0003DMG400000099,PGSC0003DMG400008931,PGSC0003DMG400014444,PGSC0003DMG401007235,PGSC0003DMG400002757,PGSC0003DMG402012933,PGSC0003DMG400039862,PGSC0003DMG400003564,PGSC0003DMG400002145,PGSC0003DMG400001336,PGSC0003DMG401010181,…
GO:0008270	zinc ion binding	molecular_function	0.17303	1	220	2387	2463	29181	PGSC0003DMG400008519,PGSC0003DMG400000401,PGSC0003DMG400029165,PGSC0003DMG400002007,PGSC0003DMG400014184,PGSC0003DMG400006829,PGSC0003DMG400022255,PGSC0003DMG400007837,PGSC0003DMG400023319,PGSC0003DMG400028579,PGSC0003DMG400015742,PGSC0003DMG400008716,PGSC0003DMG400000311,PGSC0003DMG400009420,PGSC0003DMG400009912,PGSC0003DMG400005742,PGSC0003DMG400023881,PGSC0003DMG400023341,Novel00709,PGSC0003DM…
GO:0017076	purine nucleotide binding	molecular_function	0.17316	1	435	2387	4493	29181	PGSC0003DMG400001391,Novel01438,PGSC0003DMG400012605,PGSC0003DMG400012447,PGSC0003DMG400010007,PGSC0003DMG400015697,PGSC0003DMG402012723,PGSC0003DMG400032791,PGSC0003DMG402008032,PGSC0003DMG400008728,PGSC0003DMG400020749,PGSC0003DMG400017061,PGSC0003DMG401002242,PGSC0003DMG400018222,PGSC0003DMG400019669,PGSC0003DMG400029787,PGSC0003DMG400014694,PGSC0003DMG402031196,PGSC0003DMG400020249,PGSC0003DM…
GO:0006486	protein glycosylation	biological_process	0.1734	1	16	2387	139	29181	PGSC0003DMG400027791,PGSC0003DMG400033031,PGSC0003DMG400029547,PGSC0003DMG400030897,PGSC0003DMG400003522,PGSC0003DMG400025194,PGSC0003DMG400005216,PGSC0003DMG401012430,PGSC0003DMG400003073,PGSC0003DMG400012635,PGSC0003DMG402000674,Novel03161,PGSC0003DMG400002359,PGSC0003DMG400011479,PGSC0003DMG400002423,PGSC0003DMG400018405
GO:0043413	macromolecule glycosylation	biological_process	0.1734	1	16	2387	139	29181	PGSC0003DMG400002423,PGSC0003DMG400018405,PGSC0003DMG400011479,PGSC0003DMG400002359,Novel03161,PGSC0003DMG400012635,PGSC0003DMG402000674,PGSC0003DMG400003073,PGSC0003DMG400005216,PGSC0003DMG401012430,PGSC0003DMG400025194,PGSC0003DMG400003522,PGSC0003DMG400029547,PGSC0003DMG400030897,PGSC0003DMG400033031,PGSC0003DMG400027791
GO:0004448	isocitrate dehydrogenase activity	molecular_function	0.17446	1	1	2387	2	29181	PGSC0003DMG400042507
GO:0004450	isocitrate dehydrogenase (NADP+) activity	molecular_function	0.17446	1	1	2387	2	29181	PGSC0003DMG400042507
GO:0007286	spermatid development	biological_process	0.1745	1	3	2387	19	29181	PGSC0003DMG400010413,PGSC0003DMG400002231,PGSC0003DMG400016544
GO:0048515	spermatid differentiation	biological_process	0.1745	1	3	2387	19	29181	PGSC0003DMG400002231,PGSC0003DMG400010413,PGSC0003DMG400016544
GO:0019072	viral genome packaging	biological_process	0.17455	1	5	2387	35	29181	PGSC0003DMG403003025,PGSC0003DMG400005197,PGSC0003DMG400009939,PGSC0003DMG400010897,PGSC0003DMG400004167
GO:0009069	serine family amino acid metabolic process	biological_process	0.17508	1	5	2387	34	29181	PGSC0003DMG400026156,PGSC0003DMG400022181,PGSC0003DMG400020541,PGSC0003DMG400024609,PGSC0003DMG400019717
GO:0030435	sporulation resulting in formation of a cellular spore	biological_process	0.17629	1	5	2387	34	29181	PGSC0003DMG402024549,PGSC0003DMG400027323,PGSC0003DMG400001544,PGSC0003DMG400010041,PGSC0003DMG400021255
GO:0004645	phosphorylase activity	molecular_function	0.17658	1	2	2387	9	29181	PGSC0003DMG400031765,Novel00097
GO:0008184	glycogen phosphorylase activity	molecular_function	0.17658	1	2	2387	9	29181	PGSC0003DMG400031765,Novel00097
GO:0006448	regulation of translational elongation	biological_process	0.17714	1	3	2387	19	29181	PGSC0003DMG400030519,PGSC0003DMG400031029,PGSC0003DMG400000716
GO:0006403	RNA localization	biological_process	0.17719	1	16	2387	146	29181	PGSC0003DMG400003103,PGSC0003DMG400000434,PGSC0003DMG400011359,PGSC0003DMG400003111,PGSC0003DMG400027534,PGSC0003DMG400022061,PGSC0003DMG400017655,PGSC0003DMG400007012,PGSC0003DMG400028320,PGSC0003DMG400017581,PGSC0003DMG400017743,PGSC0003DMG400019466,PGSC0003DMG400019455,PGSC0003DMG400005799,PGSC0003DMG400004162,PGSC0003DMG400000498
GO:0050657	nucleic acid transport	biological_process	0.17719	1	16	2387	146	29181	PGSC0003DMG400022061,PGSC0003DMG400027534,PGSC0003DMG400003111,PGSC0003DMG400011359,PGSC0003DMG400003103,PGSC0003DMG400000434,PGSC0003DMG400019466,PGSC0003DMG400005799,PGSC0003DMG400019455,PGSC0003DMG400000498,PGSC0003DMG400004162,PGSC0003DMG400017581,PGSC0003DMG400017743,PGSC0003DMG400017655,PGSC0003DMG400028320,PGSC0003DMG400007012
GO:0050658	RNA transport	biological_process	0.17719	1	16	2387	146	29181	PGSC0003DMG400003103,PGSC0003DMG400000434,PGSC0003DMG400003111,PGSC0003DMG400011359,PGSC0003DMG400027534,PGSC0003DMG400022061,PGSC0003DMG400017655,PGSC0003DMG400028320,PGSC0003DMG400007012,PGSC0003DMG400017581,PGSC0003DMG400017743,PGSC0003DMG400005799,PGSC0003DMG400019466,PGSC0003DMG400019455,PGSC0003DMG400000498,PGSC0003DMG400004162
GO:0051236	establishment of RNA localization	biological_process	0.17719	1	16	2387	146	29181	PGSC0003DMG400017743,PGSC0003DMG400017581,PGSC0003DMG400000498,PGSC0003DMG400004162,PGSC0003DMG400019466,PGSC0003DMG400005799,PGSC0003DMG400019455,PGSC0003DMG400028320,PGSC0003DMG400007012,PGSC0003DMG400017655,PGSC0003DMG400027534,PGSC0003DMG400022061,PGSC0003DMG400000434,PGSC0003DMG400003103,PGSC0003DMG400003111,PGSC0003DMG400011359
GO:0033655	host cell cytoplasm part	cellular_component	0.17747	1	3	2387	15	29181	PGSC0003DMG400006975,PGSC0003DMG400018107,PGSC0003DMG400022860
GO:0034599	cellular response to oxidative stress	biological_process	0.17774	1	3	2387	20	29181	PGSC0003DMG400025751,PGSC0003DMG400024109,PGSC0003DMG402020303
GO:0044281	small molecule metabolic process	biological_process	0.17783	1	219	2387	2351	29181	PGSC0003DMG400032792,PGSC0003DMG400021199,PGSC0003DMG400019734,PGSC0003DMG400020541,PGSC0003DMG400025194,Novel03614,PGSC0003DMG400030838,PGSC0003DMG400024609,PGSC0003DMG403024074,PGSC0003DMG400027002,PGSC0003DMG400030843,Novel03210,PGSC0003DMG400007092,PGSC0003DMG400018234,PGSC0003DMG400016820,PGSC0003DMG400005926,PGSC0003DMG400015549,PGSC0003DMG400008882,PGSC0003DMG400002593,PGSC0003DMG400024914…
GO:0016703	oxidoreductase activity, acting on single donors with incorporation of molecular oxygen, incorporation of one atom of oxygen (internal monooxygenases or internal mixed function oxidases)	molecular_function	0.18041	1	5	2387	31	29181	PGSC0003DMG400021248,PGSC0003DMG400000457,PGSC0003DMG400017570,PGSC0003DMG400006483,PGSC0003DMG400027521
GO:0030153	bacteriocin immunity	biological_process	0.18042	1	7	2387	55	29181	PGSC0003DMG400028752,PGSC0003DMG400003073,PGSC0003DMG400000209,PGSC0003DMG401013333,PGSC0003DMG400024109,PGSC0003DMG401028577,PGSC0003DMG400021177
GO:0009100	glycoprotein metabolic process	biological_process	0.18194	1	17	2387	149	29181	PGSC0003DMG402000674,PGSC0003DMG400012635,Novel03161,PGSC0003DMG400002359,PGSC0003DMG400011479,PGSC0003DMG400018405,PGSC0003DMG400002423,PGSC0003DMG400000588,PGSC0003DMG400025194,PGSC0003DMG400003522,PGSC0003DMG401012430,PGSC0003DMG400005216,PGSC0003DMG400003073,PGSC0003DMG400033031,PGSC0003DMG400030897,PGSC0003DMG400029547,PGSC0003DMG400027791
GO:0019013	viral nucleocapsid	cellular_component	0.18284	1	11	2387	96	29181	PGSC0003DMG400014327,PGSC0003DMG400027323,PGSC0003DMG400025174,PGSC0003DMG400018461,PGSC0003DMG400011772,PGSC0003DMG400029725,PGSC0003DMG400022345,PGSC0003DMG400010897,PGSC0003DMG400032180,PGSC0003DMG400031765,PGSC0003DMG400003035
GO:0044237	cellular metabolic process	biological_process	0.18391	1	1173	2387	13511	29181	PGSC0003DMG401000287,PGSC0003DMG400015849,PGSC0003DMG400029792,PGSC0003DMG401027256,PGSC0003DMG401013919,PGSC0003DMG400016465,PGSC0003DMG401012197,Novel00051,PGSC0003DMG400026577,Novel00015,PGSC0003DMG400005688,PGSC0003DMG401026272,PGSC0003DMG400033584,PGSC0003DMG400025700,PGSC0003DMG400020422,PGSC0003DMG400030519,PGSC0003DMG400003625,PGSC0003DMG400019523,PGSC0003DMG402013013,PGSC0003DMG400018435…
GO:0043248	proteasome assembly	biological_process	0.18435	1	6	2387	42	29181	PGSC0003DMG400006102,PGSC0003DMG400027002,PGSC0003DMG400014709,PGSC0003DMG400009279,PGSC0003DMG400009912,PGSC0003DMG400009914
GO:0080090	regulation of primary metabolic process	biological_process	0.18512	1	355	2387	3964	29181	PGSC0003DMG400006369,PGSC0003DMG400011359,PGSC0003DMG400010913,PGSC0003DMG400021719,PGSC0003DMG400022061,PGSC0003DMG400021607,PGSC0003DMG400017053,PGSC0003DMG400031029,PGSC0003DMG400001378,PGSC0003DMG402004578,PGSC0003DMG400022157,PGSC0003DMG402010657,PGSC0003DMG400027194,PGSC0003DMG400007951,PGSC0003DMG400033028,PGSC0003DMG400019178,PGSC0003DMG400018510,PGSC0003DMG400021423,PGSC0003DMG400020951,…
GO:0046914	transition metal ion binding	molecular_function	0.18543	1	316	2387	3554	29181	PGSC0003DMG402029813,PGSC0003DMG400002383,PGSC0003DMG400019647,PGSC0003DMG400012041,PGSC0003DMG400024490,PGSC0003DMG400033932,PGSC0003DMG400001398,PGSC0003DMG400030069,PGSC0003DMG400022093,PGSC0003DMG400017762,PGSC0003DMG400013090,PGSC0003DMG400005673,PGSC0003DMG400025884,PGSC0003DMG400025436,PGSC0003DMG400014709,PGSC0003DMG400011022,Novel02891,PGSC0003DMG400001246,PGSC0003DMG400030714,PGSC0003DM…
GO:0007131	reciprocal meiotic recombination	biological_process	0.18652	1	7	2387	53	29181	PGSC0003DMG400012947,PGSC0003DMG400033031,PGSC0003DMG400000836,PGSC0003DMG400012795,PGSC0003DMG400013550,PGSC0003DMG400017744,PGSC0003DMG400021629
GO:0035825	reciprocal DNA recombination	biological_process	0.18652	1	7	2387	53	29181	PGSC0003DMG400021629,PGSC0003DMG400017744,PGSC0003DMG400012795,PGSC0003DMG400013550,PGSC0003DMG400000836,PGSC0003DMG400033031,PGSC0003DMG400012947
GO:0044431	Golgi apparatus part	cellular_component	0.18663	1	23	2387	211	29181	PGSC0003DMG400018781,PGSC0003DMG400025065,PGSC0003DMG400041458,PGSC0003DMG400008571,PGSC0003DMG400020827,PGSC0003DMG400027344,PGSC0003DMG400005828,PGSC0003DMG400000498,PGSC0003DMG400022381,PGSC0003DMG401011206,PGSC0003DMG400017572,PGSC0003DMG400002452,PGSC0003DMG400011728,PGSC0003DMG400017570,PGSC0003DMG400021282,Novel03396,PGSC0003DMG400017751,PGSC0003DMG400002132,PGSC0003DMG400001417,Novel03303…
GO:0003688	DNA replication origin binding	molecular_function	0.18721	1	4	2387	25	29181	PGSC0003DMG401013540,PGSC0003DMG400032550,PGSC0003DMG400020422,PGSC0003DMG400008393
GO:0043462	regulation of ATPase activity	biological_process	0.18737	1	2	2387	12	29181	PGSC0003DMG402008019,PGSC0003DMG400000292
GO:0032400	melanosome localization	biological_process	0.1887	1	1	2387	2	29181	PGSC0003DMG400032563
GO:0032401	establishment of melanosome localization	biological_process	0.1887	1	1	2387	2	29181	PGSC0003DMG400032563
GO:0032402	melanosome transport	biological_process	0.1887	1	1	2387	2	29181	PGSC0003DMG400032563
GO:0033059	cellular pigmentation	biological_process	0.1887	1	1	2387	2	29181	PGSC0003DMG400032563
GO:0043473	pigmentation	biological_process	0.1887	1	1	2387	2	29181	PGSC0003DMG400032563
GO:0051875	pigment granule localization	biological_process	0.1887	1	1	2387	2	29181	PGSC0003DMG400032563
GO:0051904	pigment granule transport	biological_process	0.1887	1	1	2387	2	29181	PGSC0003DMG400032563
GO:0051905	establishment of pigment granule localization	biological_process	0.1887	1	1	2387	2	29181	PGSC0003DMG400032563
GO:0010277	chlorophyllide a oxygenase [overall] activity	molecular_function	0.18913	1	3	2387	15	29181	PGSC0003DMG400000457,PGSC0003DMG400027521,PGSC0003DMG400017570
GO:0032555	purine ribonucleotide binding	molecular_function	0.19066	1	429	2387	4439	29181	PGSC0003DMG400028562,PGSC0003DMG400014150,PGSC0003DMG400020215,PGSC0003DMG400025596,PGSC0003DMG400004687,Novel00239,PGSC0003DMG400025511,Novel02246,PGSC0003DMG400004995,PGSC0003DMG400006785,PGSC0003DMG402000927,PGSC0003DMG400014709,PGSC0003DMG400009016,PGSC0003DMG400028001,PGSC0003DMG400013090,PGSC0003DMG400013804,PGSC0003DMG400014405,PGSC0003DMG400012926,PGSC0003DMG400019803,PGSC0003DMG400001398…
GO:0006032	chitin catabolic process	biological_process	0.19074	1	4	2387	27	29181	Novel01597,PGSC0003DMG400027415,PGSC0003DMG402024871,PGSC0003DMG400031217
GO:0046348	amino sugar catabolic process	biological_process	0.19074	1	4	2387	27	29181	PGSC0003DMG400031217,PGSC0003DMG402024871,PGSC0003DMG400027415,Novel01597
GO:1901072	glucosamine-containing compound catabolic process	biological_process	0.19074	1	4	2387	27	29181	PGSC0003DMG402024871,PGSC0003DMG400031217,Novel01597,PGSC0003DMG400027415
GO:0042151	nematocyst	cellular_component	0.19077	1	4	2387	26	29181	PGSC0003DMG400011414,PGSC0003DMG400023710,PGSC0003DMG400018875,PGSC0003DMG400009821
GO:0030682	evasion or tolerance of host defense response	biological_process	0.19097	1	6	2387	43	29181	PGSC0003DMG400001099,PGSC0003DMG400006975,PGSC0003DMG400022860,PGSC0003DMG400023341,PGSC0003DMG400020519,PGSC0003DMG400004735
GO:0051807	evasion or tolerance of defense response of other organism involved in symbiotic interaction	biological_process	0.19097	1	6	2387	43	29181	PGSC0003DMG400004735,PGSC0003DMG400001099,PGSC0003DMG400020519,PGSC0003DMG400023341,PGSC0003DMG400006975,PGSC0003DMG400022860
GO:0016849	phosphorus-oxygen lyase activity	molecular_function	0.19193	1	6	2387	43	29181	Novel03299,PGSC0003DMG400031029,PGSC0003DMG400030100,PGSC0003DMG402020303,PGSC0003DMG402027172,PGSC0003DMG400018516
GO:0008830	dTDP-4-dehydrorhamnose 3,5-epimerase activity	molecular_function	0.193	1	1	2387	3	29181	PGSC0003DMG400018168
GO:0000904	cell morphogenesis involved in differentiation	biological_process	0.19338	1	8	2387	59	29181	PGSC0003DMG400000394,PGSC0003DMG400016389,PGSC0003DMG400030663,PGSC0003DMG400013949,PGSC0003DMG400027703,PGSC0003DMG400029165,PGSC0003DMG400019615,PGSC0003DMG400016465
GO:0001883	purine nucleoside binding	molecular_function	0.19382	1	428	2387	4429	29181	PGSC0003DMG400021343,PGSC0003DMG400006086,PGSC0003DMG400017949,PGSC0003DMG400006846,PGSC0003DMG400022345,Novel01782,PGSC0003DMG400011175,PGSC0003DMG400014917,PGSC0003DMG400009404,PGSC0003DMG400032129,Novel00898,PGSC0003DMG402002977,PGSC0003DMG400018811,PGSC0003DMG402002262,PGSC0003DMG400011264,PGSC0003DMG400014811,PGSC0003DMG400001990,PGSC0003DMG400022711,PGSC0003DMG400014875,PGSC0003DMG400004071…
GO:0032549	ribonucleoside binding	molecular_function	0.19382	1	428	2387	4429	29181	PGSC0003DMG400006975,PGSC0003DMG401020784,PGSC0003DMG400030425,PGSC0003DMG400018939,Novel02258,PGSC0003DMG400018693,PGSC0003DMG400004951,PGSC0003DMG402031196,PGSC0003DMG400014694,PGSC0003DMG400029787,PGSC0003DMG400019669,PGSC0003DMG401002242,PGSC0003DMG400018222,PGSC0003DMG400020249,PGSC0003DMG400017061,PGSC0003DMG400020749,PGSC0003DMG400012447,PGSC0003DMG400010007,PGSC0003DMG400001391,PGSC0003DM…
GO:0032550	purine ribonucleoside binding	molecular_function	0.19382	1	428	2387	4429	29181	PGSC0003DMG400023334,PGSC0003DMG400035738,PGSC0003DMG400022312,PGSC0003DMG400005612,PGSC0003DMG400038020,PGSC0003DMG400020136,PGSC0003DMG404029448,PGSC0003DMG400027940,PGSC0003DMG400041458,PGSC0003DMG400014225,PGSC0003DMG400018903,PGSC0003DMG402006188,PGSC0003DMG400017838,PGSC0003DMG400031248,PGSC0003DMG400030849,PGSC0003DMG400023536,PGSC0003DMG400015324,PGSC0003DMG400015492,PGSC0003DMG400027048,…
GO:0008320	protein transmembrane transporter activity	molecular_function	0.19415	1	2	2387	9	29181	PGSC0003DMG400006726,Novel00898
GO:0015450	P-P-bond-hydrolysis-driven protein transmembrane transporter activity	molecular_function	0.19415	1	2	2387	9	29181	PGSC0003DMG400006726,Novel00898
GO:0004375	glycine dehydrogenase (decarboxylating) activity	molecular_function	0.19429	1	1	2387	2	29181	PGSC0003DMG400020541
GO:0006546	glycine catabolic process	biological_process	0.19429	1	1	2387	2	29181	PGSC0003DMG400020541
GO:0009071	serine family amino acid catabolic process	biological_process	0.19429	1	1	2387	2	29181	PGSC0003DMG400020541
GO:0016642	oxidoreductase activity, acting on the CH-NH2 group of donors, disulfide as acceptor	molecular_function	0.19429	1	1	2387	2	29181	PGSC0003DMG400020541
GO:0006464	cellular protein modification process	biological_process	0.19493	1	255	2387	2599	29181	PGSC0003DMG400030625,PGSC0003DMG400017473,PGSC0003DMG400007030,PGSC0003DMG400025030,PGSC0003DMG400027683,PGSC0003DMG400027759,PGSC0003DMG400021358,PGSC0003DMG400032509,PGSC0003DMG400029626,PGSC0003DMG400019398,PGSC0003DMG402010496,PGSC0003DMG400025162,PGSC0003DMG400011160,PGSC0003DMG400022061,PGSC0003DMG401029775,PGSC0003DMG400013489,PGSC0003DMG400006916,PGSC0003DMG400030115,PGSC0003DMG400030897,…
GO:0036211	protein modification process	biological_process	0.19493	1	255	2387	2599	29181	Novel00463,PGSC0003DMG400003564,PGSC0003DMG400024971,PGSC0003DMG400013697,Novel00755,Novel01656,PGSC0003DMG400005040,PGSC0003DMG400011005,PGSC0003DMG400009571,PGSC0003DMG400026436,PGSC0003DMG401019239,PGSC0003DMG400021422,PGSC0003DMG403018633,PGSC0003DMG400029547,PGSC0003DMG400019635,PGSC0003DMG400010478,PGSC0003DMG400030680,PGSC0003DMG401003285,PGSC0003DMG400031310,PGSC0003DMG400004035,PGSC0003D…
GO:0031406	carboxylic acid binding	molecular_function	0.19513	1	12	2387	100	29181	PGSC0003DMG400021409,PGSC0003DMG402006673,PGSC0003DMG400027654,PGSC0003DMG400028578,PGSC0003DMG400014224,PGSC0003DMG400018939,PGSC0003DMG400021719,PGSC0003DMG400012237,PGSC0003DMG400017440,PGSC0003DMG400008882,PGSC0003DMG400025374,PGSC0003DMG400019514
GO:0043177	organic acid binding	molecular_function	0.19513	1	12	2387	100	29181	PGSC0003DMG400018939,PGSC0003DMG400014224,PGSC0003DMG400021719,PGSC0003DMG400017440,PGSC0003DMG400008882,PGSC0003DMG400019514,PGSC0003DMG400025374,PGSC0003DMG400012237,PGSC0003DMG402006673,PGSC0003DMG400021409,PGSC0003DMG400027654,PGSC0003DMG400028578
GO:0042278	purine nucleoside metabolic process	biological_process	0.19568	1	51	2387	532	29181	PGSC0003DMG400027693,PGSC0003DMG400014944,PGSC0003DMG400017655,PGSC0003DMG400028924,PGSC0003DMG400007760,PGSC0003DMG402026306,PGSC0003DMG400013550,PGSC0003DMG400035389,PGSC0003DMG401027166,PGSC0003DMG400008065,PGSC0003DMG400020484,PGSC0003DMG400024914,PGSC0003DMG400026643,PGSC0003DMG400009353,PGSC0003DMG400000367,PGSC0003DMG400007092,PGSC0003DMG400024220,PGSC0003DMG400005926,PGSC0003DMG400016820,…
GO:0046128	purine ribonucleoside metabolic process	biological_process	0.19568	1	51	2387	532	29181	PGSC0003DMG400015392,PGSC0003DMG400020497,PGSC0003DMG400024701,PGSC0003DMG400032558,PGSC0003DMG400015766,PGSC0003DMG400010007,Novel03007,PGSC0003DMG400022417,PGSC0003DMG400003906,PGSC0003DMG400022770,PGSC0003DMG400003882,PGSC0003DMG400020740,PGSC0003DMG400027925,Novel01389,PGSC0003DMG400022825,PGSC0003DMG400010691,PGSC0003DMG401029267,PGSC0003DMG400027321,PGSC0003DMG400024220,PGSC0003DMG400005926…
GO:0000124	SAGA complex	cellular_component	0.1957	1	3	2387	17	29181	PGSC0003DMG400031798,PGSC0003DMG400032104,PGSC0003DMG400030246
GO:0046649	lymphocyte activation	biological_process	0.19603	1	4	2387	23	29181	PGSC0003DMG400019635,PGSC0003DMG400025700,PGSC0003DMG400003319,PGSC0003DMG400018283
GO:0004143	diacylglycerol kinase activity	molecular_function	0.19644	1	3	2387	17	29181	PGSC0003DMG400017743,PGSC0003DMG400002241,PGSC0003DMG400029879
GO:0051784	negative regulation of nuclear division	biological_process	0.19742	1	6	2387	47	29181	PGSC0003DMG402013013,PGSC0003DMG400022209,PGSC0003DMG400008931,PGSC0003DMG400019455,PGSC0003DMG400023478,PGSC0003DMG400022061
GO:0019049	evasion or tolerance of host defenses by virus	biological_process	0.19756	1	6	2387	43	29181	PGSC0003DMG400006975,PGSC0003DMG400022860,PGSC0003DMG400020519,PGSC0003DMG400035689,PGSC0003DMG400008545,PGSC0003DMG402021193
GO:0016054	organic acid catabolic process	biological_process	0.19795	1	13	2387	108	29181	PGSC0003DMG400010334,PGSC0003DMG400020620,PGSC0003DMG400027192,PGSC0003DMG400023881,PGSC0003DMG400027002,PGSC0003DMG400017724,PGSC0003DMG400015330,PGSC0003DMG400020541,PGSC0003DMG402000914,PGSC0003DMG400005361,Novel00393,PGSC0003DMG401002654,PGSC0003DMG400003747
GO:0046395	carboxylic acid catabolic process	biological_process	0.19795	1	13	2387	108	29181	PGSC0003DMG400020620,PGSC0003DMG400010334,PGSC0003DMG400027192,PGSC0003DMG400023881,PGSC0003DMG400027002,PGSC0003DMG400015330,PGSC0003DMG400017724,PGSC0003DMG402000914,PGSC0003DMG400005361,PGSC0003DMG400020541,Novel00393,PGSC0003DMG400003747,PGSC0003DMG401002654
GO:0010821	regulation of mitochondrion organization	biological_process	0.19831	1	1	2387	3	29181	PGSC0003DMG400025174
GO:0010822	positive regulation of mitochondrion organization	biological_process	0.19831	1	1	2387	3	29181	PGSC0003DMG400025174
GO:0090199	regulation of release of cytochrome c from mitochondria	biological_process	0.19831	1	1	2387	3	29181	PGSC0003DMG400025174
GO:0090200	positive regulation of release of cytochrome c from mitochondria	biological_process	0.19831	1	1	2387	3	29181	PGSC0003DMG400025174
GO:0097193	intrinsic apoptotic signaling pathway	biological_process	0.19831	1	1	2387	3	29181	PGSC0003DMG400025174
GO:2001233	regulation of apoptotic signaling pathway	biological_process	0.19831	1	1	2387	3	29181	PGSC0003DMG400025174
GO:2001235	positive regulation of apoptotic signaling pathway	biological_process	0.19831	1	1	2387	3	29181	PGSC0003DMG400025174
GO:0051536	iron-sulfur cluster binding	molecular_function	0.19865	1	29	2387	285	29181	PGSC0003DMG402005881,PGSC0003DMG400032160,PGSC0003DMG400030758,PGSC0003DMG402014462,Novel00367,PGSC0003DMG400040010,Novel01728,Novel01122,PGSC0003DMG400000209,PGSC0003DMG400019888,PGSC0003DMG400018839,PGSC0003DMG401006826,PGSC0003DMG400013309,PGSC0003DMG400021422,PGSC0003DMG400025041,PGSC0003DMG400004542,PGSC0003DMG400011772,PGSC0003DMG400018194,PGSC0003DMG400009912,PGSC0003DMG400006285,PGSC0003D…
GO:0051540	metal cluster binding	molecular_function	0.19865	1	29	2387	285	29181	PGSC0003DMG400017407,PGSC0003DMG400018246,PGSC0003DMG400035689,PGSC0003DMG400004532,Novel03418,PGSC0003DMG400017570,PGSC0003DMG400012761,PGSC0003DMG400000457,PGSC0003DMG400006285,PGSC0003DMG400019574,PGSC0003DMG400009912,PGSC0003DMG400011772,PGSC0003DMG400018194,PGSC0003DMG400021422,PGSC0003DMG400013309,PGSC0003DMG400004542,PGSC0003DMG400025041,PGSC0003DMG400018839,PGSC0003DMG401006826,PGSC0003DM…
GO:0048878	chemical homeostasis	biological_process	0.19968	1	13	2387	130	29181	Novel01525,PGSC0003DMG400006102,PGSC0003DMG400005638,PGSC0003DMG401029997,PGSC0003DMG400006327,PGSC0003DMG400005154,PGSC0003DMG400024986,PGSC0003DMG400003632,PGSC0003DMG400009085,PGSC0003DMG400028320,PGSC0003DMG400026534,PGSC0003DMG400028497,PGSC0003DMG400027119
GO:0022804	active transmembrane transporter activity	molecular_function	0.20015	1	56	2387	566	29181	PGSC0003DMG400012425,PGSC0003DMG400027061,PGSC0003DMG400007092,PGSC0003DMG400004061,PGSC0003DMG400005301,PGSC0003DMG400002132,PGSC0003DMG400025433,PGSC0003DMG400030519,PGSC0003DMG400000209,PGSC0003DMG400005256,Novel03303,PGSC0003DMG400031248,PGSC0003DMG400009085,PGSC0003DMG400017751,PGSC0003DMG400024336,PGSC0003DMG400003411,PGSC0003DMG400007358,PGSC0003DMG400031029,PGSC0003DMG400019514,PGSC0003DM…
GO:0006020	inositol metabolic process	biological_process	0.20102	1	3	2387	18	29181	PGSC0003DMG400027916,PGSC0003DMG400001998,PGSC0003DMG401000287
GO:0005215	transporter activity	molecular_function	0.2012	1	266	2387	2937	29181	Novel03229,PGSC0003DMG400019455,PGSC0003DMG400005943,PGSC0003DMG400004087,PGSC0003DMG400032558,PGSC0003DMG400011692,PGSC0003DMG403002548,PGSC0003DMG400023402,PGSC0003DMG400024266,PGSC0003DMG400003964,PGSC0003DMG400009914,PGSC0003DMG400005009,PGSC0003DMG400009779,Novel02683,PGSC0003DMG400001378,PGSC0003DMG400031029,PGSC0003DMG402000668,PGSC0003DMG400009659,PGSC0003DMG400022993,PGSC0003DMG402028252…
GO:0010212	response to ionizing radiation	biological_process	0.20133	1	2	2387	10	29181	Novel03396,PGSC0003DMG400020541
GO:0071214	cellular response to abiotic stimulus	biological_process	0.20133	1	2	2387	10	29181	PGSC0003DMG400020541,Novel03396
GO:0071478	cellular response to radiation	biological_process	0.20133	1	2	2387	10	29181	Novel03396,PGSC0003DMG400020541
GO:0071479	cellular response to ionizing radiation	biological_process	0.20133	1	2	2387	10	29181	Novel03396,PGSC0003DMG400020541
GO:0015128	gluconate transmembrane transporter activity	molecular_function	0.20213	1	2	2387	9	29181	PGSC0003DMG400009290,PGSC0003DMG400012523
GO:0042873	aldonate transport	biological_process	0.20213	1	2	2387	9	29181	PGSC0003DMG400012523,PGSC0003DMG400009290
GO:0042879	aldonate transmembrane transporter activity	molecular_function	0.20213	1	2	2387	9	29181	PGSC0003DMG400009290,PGSC0003DMG400012523
GO:0008168	methyltransferase activity	molecular_function	0.20242	1	82	2387	859	29181	PGSC0003DMG400013424,PGSC0003DMG400010119,PGSC0003DMG400029624,PGSC0003DMG401006826,PGSC0003DMG400021254,PGSC0003DMG400025700,PGSC0003DMG400004415,PGSC0003DMG401026272,PGSC0003DMG400022873,PGSC0003DMG400030849,PGSC0003DMG400000343,PGSC0003DMG400014268,PGSC0003DMG400026577,PGSC0003DMG400002773,PGSC0003DMG402032565,PGSC0003DMG400015378,PGSC0003DMG401000859,PGSC0003DMG400003775,PGSC0003DMG400002757,…
GO:0032553	ribonucleotide binding	molecular_function	0.20245	1	434	2387	4508	29181	PGSC0003DMG400004750,PGSC0003DMG400025126,PGSC0003DMG400000872,PGSC0003DMG402005482,PGSC0003DMG400034531,PGSC0003DMG400022210,Novel00622,PGSC0003DMG400008871,PGSC0003DMG400009321,PGSC0003DMG400010157,PGSC0003DMG400003035,PGSC0003DMG400004087,PGSC0003DMG400026493,PGSC0003DMG400005943,Novel03410,PGSC0003DMG400016823,PGSC0003DMG400031026,PGSC0003DMG400023436,Novel01143,Novel02627,PGSC0003DMG40001112…
GO:0005212	structural constituent of eye lens	molecular_function	0.20246	1	2	2387	9	29181	PGSC0003DMG400024972,PGSC0003DMG400004071
GO:0001882	nucleoside binding	molecular_function	0.20376	1	429	2387	4447	29181	PGSC0003DMG400002537,PGSC0003DMG400022893,PGSC0003DMG401018599,PGSC0003DMG400015330,PGSC0003DMG400004415,PGSC0003DMG400020422,PGSC0003DMG400027204,PGSC0003DMG400026156,PGSC0003DMG400005335,PGSC0003DMG402029267,PGSC0003DMG400011777,PGSC0003DMG400021804,PGSC0003DMG400007963,Novel01235,Novel00273,PGSC0003DMG400011414,PGSC0003DMG400027744,PGSC0003DMG400002992,PGSC0003DMG400017946,PGSC0003DMG400007353…
GO:0004675	transmembrane receptor protein serine/threonine kinase activity	molecular_function	0.20402	1	4	2387	24	29181	PGSC0003DMG400022420,PGSC0003DMG400029165,PGSC0003DMG400010478,PGSC0003DMG400004061
GO:0043241	protein complex disassembly	biological_process	0.20417	1	13	2387	114	29181	PGSC0003DMG400030519,PGSC0003DMG400023478,PGSC0003DMG400028158,PGSC0003DMG400031271,PGSC0003DMG402005733,PGSC0003DMG400015194,PGSC0003DMG400011222,PGSC0003DMG400003882,PGSC0003DMG400008719,Novel01234,PGSC0003DMG400031029,PGSC0003DMG400015549,PGSC0003DMG400030017
GO:0070085	glycosylation	biological_process	0.20443	1	23	2387	210	29181	PGSC0003DMG400024534,PGSC0003DMG400015579,PGSC0003DMG400020640,PGSC0003DMG400003073,PGSC0003DMG400015601,PGSC0003DMG401012430,PGSC0003DMG400005216,PGSC0003DMG400025194,PGSC0003DMG400003522,Novel03161,PGSC0003DMG402000674,PGSC0003DMG400012635,PGSC0003DMG400018405,PGSC0003DMG400002423,PGSC0003DMG400011479,Novel02757,PGSC0003DMG400002359,PGSC0003DMG400027791,PGSC0003DMG400015817,PGSC0003DMG400020895…
GO:0007291	sperm individualization	biological_process	0.20451	1	2	2387	10	29181	PGSC0003DMG400016544,PGSC0003DMG400010413
GO:0051782	negative regulation of cell division	biological_process	0.20479	1	7	2387	58	29181	PGSC0003DMG400022209,PGSC0003DMG400008931,PGSC0003DMG400006509,PGSC0003DMG402013013,PGSC0003DMG400023478,PGSC0003DMG400022061,PGSC0003DMG400019455
GO:0022603	regulation of anatomical structure morphogenesis	biological_process	0.2048	1	7	2387	54	29181	PGSC0003DMG400021255,PGSC0003DMG400001544,PGSC0003DMG402012256,PGSC0003DMG400027323,PGSC0003DMG402024549,PGSC0003DMG400010710,PGSC0003DMG400031007
GO:0016168	chlorophyll binding	molecular_function	0.20534	1	2	2387	11	29181	PGSC0003DMG400004233,PGSC0003DMG400015392
GO:0048869	cellular developmental process	biological_process	0.20585	1	37	2387	363	29181	PGSC0003DMG400021659,PGSC0003DMG400016389,PGSC0003DMG400002231,PGSC0003DMG400016465,PGSC0003DMG400027323,PGSC0003DMG400013949,PGSC0003DMG400001544,PGSC0003DMG400000398,PGSC0003DMG400023012,Novel02312,PGSC0003DMG400003581,PGSC0003DMG400021253,PGSC0003DMG400025974,PGSC0003DMG400009584,PGSC0003DMG400032166,PGSC0003DMG400027703,PGSC0003DMG400019615,PGSC0003DMG400005904,PGSC0003DMG402015928,PGSC0003DM…
GO:0003953	NAD+ nucleosidase activity	molecular_function	0.20586	1	1	2387	2	29181	PGSC0003DMG400006829
GO:0006303	double-strand break repair via nonhomologous end joining	biological_process	0.20631	1	4	2387	27	29181	PGSC0003DMG400024481,PGSC0003DMG401020784,PGSC0003DMG400012761,PGSC0003DMG400004415
GO:0051252	regulation of RNA metabolic process	biological_process	0.20708	1	318	2387	3578	29181	Novel02569,PGSC0003DMG400006801,PGSC0003DMG400026821,PGSC0003DMG400003536,PGSC0003DMG400017116,Novel01891,PGSC0003DMG402029795,PGSC0003DMG400001544,PGSC0003DMG400011824,PGSC0003DMG400009353,PGSC0003DMG400004149,PGSC0003DMG400010897,Novel01529,PGSC0003DMG400001960,PGSC0003DMG400020086,PGSC0003DMG400027167,PGSC0003DMG400016019,PGSC0003DMG400018234,PGSC0003DMG400017485,PGSC0003DMG400020541,PGSC0003D…
GO:0044712	single-organism catabolic process	biological_process	0.20719	1	50	2387	505	29181	PGSC0003DMG400015392,PGSC0003DMG400024701,PGSC0003DMG400027192,PGSC0003DMG400005361,PGSC0003DMG400023478,PGSC0003DMG400015766,PGSC0003DMG400031765,PGSC0003DMG401002654,PGSC0003DMG400008931,PGSC0003DMG400010007,Novel00393,PGSC0003DMG400010334,PGSC0003DMG400031849,PGSC0003DMG400003882,PGSC0003DMG400024378,PGSC0003DMG400022209,Novel01389,PGSC0003DMG400027925,PGSC0003DMG400023881,PGSC0003DMG400010691…
GO:0060589	nucleoside-triphosphatase regulator activity	molecular_function	0.20772	1	27	2387	268	29181	PGSC0003DMG400016203,PGSC0003DMG400017515,PGSC0003DMG400009098,PGSC0003DMG400019824,PGSC0003DMG400028520,PGSC0003DMG400027438,PGSC0003DMG400025610,PGSC0003DMG400002400,PGSC0003DMG400017485,PGSC0003DMG402008019,PGSC0003DMG400014722,PGSC0003DMG400026364,PGSC0003DMG400000498,PGSC0003DMG402006496,PGSC0003DMG401011001,PGSC0003DMG402005259,PGSC0003DMG400015251,PGSC0003DMG400020827,PGSC0003DMG400005633,…
GO:0008134	transcription factor binding	molecular_function	0.20856	1	34	2387	317	29181	PGSC0003DMG400022027,Novel00239,Novel02713,PGSC0003DMG400008871,PGSC0003DMG402031196,PGSC0003DMG402016772,PGSC0003DMG401002242,PGSC0003DMG400015506,Novel02118,PGSC0003DMG400009730,PGSC0003DMG400018693,PGSC0003DMG400021282,PGSC0003DMG400030425,PGSC0003DMG400027514,PGSC0003DMG400001398,PGSC0003DMG400007182,PGSC0003DMG401003154,PGSC0003DMG400033569,PGSC0003DMG400007496,PGSC0003DMG400020086,PGSC0003D…
GO:0051246	regulation of protein metabolic process	biological_process	0.20877	1	38	2387	357	29181	PGSC0003DMG402028565,PGSC0003DMG402013013,PGSC0003DMG400006128,PGSC0003DMG400013693,PGSC0003DMG400025475,PGSC0003DMG400030519,PGSC0003DMG400022061,PGSC0003DMG400011207,PGSC0003DMG400022893,PGSC0003DMG400019475,Novel00814,PGSC0003DMG400000716,PGSC0003DMG400001336,PGSC0003DMG401010181,PGSC0003DMG400031029,PGSC0003DMG400016465,PGSC0003DMG400031310,PGSC0003DMG400015232,PGSC0003DMG400010478,PGSC0003DM…
GO:0042132	fructose 1,6-bisphosphate 1-phosphatase activity	molecular_function	0.2112	1	3	2387	18	29181	PGSC0003DMG400010413,PGSC0003DMG400033584,PGSC0003DMG400024109
GO:0008641	small protein activating enzyme activity	molecular_function	0.2124	1	6	2387	44	29181	Novel01303,PGSC0003DMG400030951,PGSC0003DMG400032154,PGSC0003DMG400019634,PGSC0003DMG400022209,PGSC0003DMG400015268
GO:0051180	vitamin transport	biological_process	0.21283	1	3	2387	18	29181	PGSC0003DMG400000583,PGSC0003DMG400032792,PGSC0003DMG400020708
GO:0016741	transferase activity, transferring one-carbon groups	molecular_function	0.21318	1	85	2387	895	29181	PGSC0003DMG400000582,PGSC0003DMG400004949,PGSC0003DMG400003882,PGSC0003DMG400033615,PGSC0003DMG400003540,PGSC0003DMG400014430,PGSC0003DMG400023317,PGSC0003DMG400019135,PGSC0003DMG400027192,PGSC0003DMG400030870,PGSC0003DMG401027248,PGSC0003DMG400001350,PGSC0003DMG400012605,PGSC0003DMG400000711,PGSC0003DMG400009279,PGSC0003DMG400003078,PGSC0003DMG400022093,PGSC0003DMG400004710,PGSC0003DMG400027051,…
GO:0044057	regulation of system process	biological_process	0.21345	1	6	2387	43	29181	PGSC0003DMG402026306,PGSC0003DMG400014708,PGSC0003DMG400019142,PGSC0003DMG400003581,PGSC0003DMG400009035,PGSC0003DMG402002262
GO:0016149	translation release factor activity, codon specific	molecular_function	0.21384	1	3	2387	20	29181	PGSC0003DMG400028158,PGSC0003DMG400023478,Novel01234
GO:0032787	monocarboxylic acid metabolic process	biological_process	0.21414	1	49	2387	488	29181	PGSC0003DMG400016778,PGSC0003DMG400006854,PGSC0003DMG400001070,PGSC0003DMG400020620,PGSC0003DMG400014944,PGSC0003DMG402025863,PGSC0003DMG400026534,Novel03043,PGSC0003DMG401003285,PGSC0003DMG400005981,PGSC0003DMG400016207,PGSC0003DMG400025194,PGSC0003DMG400006129,PGSC0003DMG402027860,PGSC0003DMG400019734,PGSC0003DMG400014873,PGSC0003DMG402003505,PGSC0003DMG400024220,PGSC0003DMG400016177,PGSC0003DM…
GO:0044085	cellular component biogenesis	biological_process	0.21484	1	151	2387	1714	29181	PGSC0003DMG400009816,PGSC0003DMG400006835,PGSC0003DMG400022345,PGSC0003DMG400028158,PGSC0003DMG400038720,PGSC0003DMG400009914,PGSC0003DMG400025975,PGSC0003DMG400003073,PGSC0003DMG400016811,PGSC0003DMG402002977,PGSC0003DMG400018116,PGSC0003DMG402008019,PGSC0003DMG400043560,PGSC0003DMG400018405,PGSC0003DMG400003614,PGSC0003DMG400027654,PGSC0003DMG400021629,PGSC0003DMG400019455,PGSC0003DMG400005197,…
GO:0019219	regulation of nucleobase-containing compound metabolic process	biological_process	0.21514	1	323	2387	3640	29181	PGSC0003DMG400009475,PGSC0003DMG400019513,PGSC0003DMG400005040,PGSC0003DMG400013949,PGSC0003DMG400008734,PGSC0003DMG400021422,PGSC0003DMG401006188,PGSC0003DMG400030637,PGSC0003DMG400021287,PGSC0003DMG400015608,Novel00360,PGSC0003DMG400036536,PGSC0003DMG400041451,PGSC0003DMG400025797,PGSC0003DMG400021546,PGSC0003DMG400019615,PGSC0003DMG400001343,PGSC0003DMG400014914,PGSC0003DMG400013402,PGSC0003DM…
GO:0030119	AP-type membrane coat adaptor complex	cellular_component	0.21514	1	7	2387	51	29181	PGSC0003DMG402029307,PGSC0003DMG400013022,PGSC0003DMG400017666,PGSC0003DMG400014497,PGSC0003DMG400002980,PGSC0003DMG400033031,PGSC0003DMG402014396
GO:0032559	adenyl ribonucleotide binding	molecular_function	0.21514	1	402	2387	4154	29181	PGSC0003DMG401029267,PGSC0003DMG400022027,PGSC0003DMG400020317,PGSC0003DMG400016892,PGSC0003DMG400009821,PGSC0003DMG400017083,PGSC0003DMG400019897,PGSC0003DMG400020740,Novel02378,PGSC0003DMG402011367,PGSC0003DMG400000311,PGSC0003DMG402007138,Novel02411,PGSC0003DMG400003078,PGSC0003DMG400002045,PGSC0003DMG400037159,PGSC0003DMG400011072,PGSC0003DMG400009183,PGSC0003DMG400028639,PGSC0003DMG400021789…
GO:0004673	protein histidine kinase activity	molecular_function	0.21572	1	17	2387	159	29181	PGSC0003DMG400017744,PGSC0003DMG402005733,PGSC0003DMG400017186,PGSC0003DMG400025263,PGSC0003DMG400023954,PGSC0003DMG400034307,PGSC0003DMG401024871,PGSC0003DMG400016284,PGSC0003DMG400017581,PGSC0003DMG400031819,PGSC0003DMG400023402,Novel03299,PGSC0003DMG400007242,Novel01267,PGSC0003DMG400004233,PGSC0003DMG400015766,PGSC0003DMG400003072
GO:0016775	phosphotransferase activity, nitrogenous group as acceptor	molecular_function	0.21572	1	17	2387	159	29181	PGSC0003DMG400031819,Novel03299,PGSC0003DMG400023402,PGSC0003DMG400007242,PGSC0003DMG400004233,Novel01267,PGSC0003DMG400015766,PGSC0003DMG400003072,PGSC0003DMG400017744,PGSC0003DMG400025263,PGSC0003DMG400023954,PGSC0003DMG400034307,PGSC0003DMG402005733,PGSC0003DMG400017186,PGSC0003DMG401024871,PGSC0003DMG400016284,PGSC0003DMG400017581
GO:0007129	synapsis	biological_process	0.2159	1	5	2387	35	29181	PGSC0003DMG400000836,PGSC0003DMG400033031,PGSC0003DMG400002021,PGSC0003DMG400021629,PGSC0003DMG400013550
GO:0007130	synaptonemal complex assembly	biological_process	0.2159	1	5	2387	35	29181	PGSC0003DMG400021629,PGSC0003DMG400002021,PGSC0003DMG400013550,PGSC0003DMG400033031,PGSC0003DMG400000836
GO:0045143	homologous chromosome segregation	biological_process	0.2159	1	5	2387	35	29181	PGSC0003DMG400013550,PGSC0003DMG400021629,PGSC0003DMG400002021,PGSC0003DMG400033031,PGSC0003DMG400000836
GO:0070192	chromosome organization involved in meiosis	biological_process	0.2159	1	5	2387	35	29181	PGSC0003DMG400021629,PGSC0003DMG400002021,PGSC0003DMG400013550,PGSC0003DMG400033031,PGSC0003DMG400000836
GO:0070193	synaptonemal complex organization	biological_process	0.2159	1	5	2387	35	29181	PGSC0003DMG400021629,PGSC0003DMG400002021,PGSC0003DMG400013550,PGSC0003DMG400033031,PGSC0003DMG400000836
GO:0006098	pentose-phosphate shunt	biological_process	0.21652	1	2	2387	10	29181	PGSC0003DMG400021199,PGSC0003DMG400018369
GO:0019438	aromatic compound biosynthetic process	biological_process	0.21775	1	458	2387	5243	29181	PGSC0003DMG400029879,PGSC0003DMG400017233,PGSC0003DMG400001398,PGSC0003DMG400005675,PGSC0003DMG400026252,PGSC0003DMG400008148,PGSC0003DMG400002383,PGSC0003DMG400019647,PGSC0003DMG400027036,PGSC0003DMG400005213,PGSC0003DMG400008248,PGSC0003DMG400024772,PGSC0003DMG400033569,PGSC0003DMG402029813,PGSC0003DMG400001469,PGSC0003DMG400007496,PGSC0003DMG400037029,Novel00239,PGSC0003DMG400011022,PGSC0003DM…
GO:1902580	single-organism cellular localization	biological_process	0.21781	1	48	2387	488	29181	PGSC0003DMG401015043,PGSC0003DMG400025994,PGSC0003DMG400021177,PGSC0003DMG402029267,PGSC0003DMG400033053,PGSC0003DMG400005839,PGSC0003DMG400024126,PGSC0003DMG400003581,PGSC0003DMG400022061,Novel01810,PGSC0003DMG400001417,PGSC0003DMG400032104,PGSC0003DMG400024365,PGSC0003DMG400031248,PGSC0003DMG401010181,PGSC0003DMG400013629,PGSC0003DMG400010619,PGSC0003DMG400032563,PGSC0003DMG400024914,PGSC0003DM…
GO:0009063	cellular amino acid catabolic process	biological_process	0.2183	1	8	2387	63	29181	Novel00393,PGSC0003DMG401002654,PGSC0003DMG400003747,PGSC0003DMG400017724,PGSC0003DMG400015330,PGSC0003DMG400020541,PGSC0003DMG400005361,PGSC0003DMG402000914
GO:0030554	adenyl nucleotide binding	molecular_function	0.21843	1	406	2387	4202	29181	PGSC0003DMG400027048,PGSC0003DMG400015492,Novel02904,PGSC0003DMG400044006,PGSC0003DMG400013857,Novel01966,PGSC0003DMG400000331,PGSC0003DMG400017728,PGSC0003DMG400011045,PGSC0003DMG400009843,PGSC0003DMG400023334,PGSC0003DMG400035738,PGSC0003DMG400022312,PGSC0003DMG400000498,PGSC0003DMG400005612,PGSC0003DMG400038020,PGSC0003DMG404029448,PGSC0003DMG400020136,PGSC0003DMG400027940,PGSC0003DMG400041458…
GO:0009439	cyanate metabolic process	biological_process	0.21862	1	2	2387	11	29181	PGSC0003DMG403024074,PGSC0003DMG400010352
GO:0006355	regulation of transcription, DNA-templated	biological_process	0.21886	1	315	2387	3550	29181	PGSC0003DMG400019615,PGSC0003DMG400001343,PGSC0003DMG400025797,PGSC0003DMG400021546,PGSC0003DMG400036536,PGSC0003DMG400041451,Novel00360,PGSC0003DMG400015608,PGSC0003DMG400021287,PGSC0003DMG401006188,PGSC0003DMG400021422,PGSC0003DMG400030637,PGSC0003DMG400013949,PGSC0003DMG400008734,PGSC0003DMG400019513,PGSC0003DMG400009475,PGSC0003DMG400005040,PGSC0003DMG400027192,PGSC0003DMG402003606,Novel00287…
GO:1903506	regulation of nucleic acid-templated transcription	biological_process	0.21886	1	315	2387	3550	29181	PGSC0003DMG400027521,PGSC0003DMG400005466,PGSC0003DMG400001714,PGSC0003DMG400016714,PGSC0003DMG400031465,PGSC0003DMG400008149,PGSC0003DMG400025372,PGSC0003DMG400016512,PGSC0003DMG400000602,PGSC0003DMG400015447,PGSC0003DMG400030837,PGSC0003DMG400019406,PGSC0003DMG400016203,PGSC0003DMG400002452,PGSC0003DMG400011216,PGSC0003DMG400029944,PGSC0003DMG400018261,PGSC0003DMG402005729,PGSC0003DMG402016772,…
GO:0006739	NADP metabolic process	biological_process	0.21995	1	4	2387	26	29181	PGSC0003DMG400019734,PGSC0003DMG400021199,PGSC0003DMG400010913,PGSC0003DMG400018369
GO:1901564	organonitrogen compound metabolic process	biological_process	0.22034	1	329	2387	3713	29181	PGSC0003DMG400009353,PGSC0003DMG400010897,PGSC0003DMG400002593,PGSC0003DMG400035389,PGSC0003DMG400004723,PGSC0003DMG402005133,PGSC0003DMG400017655,PGSC0003DMG400007169,PGSC0003DMG400017116,PGSC0003DMG400024336,PGSC0003DMG400015253,PGSC0003DMG400018194,PGSC0003DMG400021199,PGSC0003DMG400025194,PGSC0003DMG400023306,PGSC0003DMG400017203,PGSC0003DMG400020541,PGSC0003DMG400013693,PGSC0003DMG403024074,…
GO:0019838	growth factor binding	molecular_function	0.22064	1	2	2387	10	29181	PGSC0003DMG400001391,PGSC0003DMG401002548
GO:0016055	Wnt signaling pathway	biological_process	0.22075	1	10	2387	83	29181	PGSC0003DMG402002053,PGSC0003DMG400030910,PGSC0003DMG400027916,PGSC0003DMG400020089,PGSC0003DMG400032118,PGSC0003DMG400008259,PGSC0003DMG400001123,PGSC0003DMG400022299,PGSC0003DMG400019881,PGSC0003DMG402023851
GO:0008047	enzyme activator activity	molecular_function	0.22115	1	21	2387	206	29181	PGSC0003DMG400016203,PGSC0003DMG400022094,PGSC0003DMG400028520,PGSC0003DMG400009098,PGSC0003DMG400017515,PGSC0003DMG400019824,PGSC0003DMG400017053,PGSC0003DMG400027449,PGSC0003DMG400001897,PGSC0003DMG400025610,PGSC0003DMG400017946,PGSC0003DMG400030017,PGSC0003DMG400030243,PGSC0003DMG400026364,PGSC0003DMG402005259,PGSC0003DMG401011001,PGSC0003DMG400005633,Novel03067,PGSC0003DMG400000615,PGSC0003DM…
GO:0006412	translation	biological_process	0.22116	1	136	2387	1549	29181	PGSC0003DMG400010478,PGSC0003DMG400030963,PGSC0003DMG400031271,PGSC0003DMG400007358,PGSC0003DMG400003091,PGSC0003DMG400000168,PGSC0003DMG400026534,PGSC0003DMG400023966,PGSC0003DMG400025373,PGSC0003DMG400030869,PGSC0003DMG400003564,PGSC0003DMG400000460,PGSC0003DMG400006128,PGSC0003DMG400033035,PGSC0003DMG400018533,PGSC0003DMG402019176,PGSC0003DMG400017528,PGSC0003DMG400019475,PGSC0003DMG400025519,…
GO:0004857	enzyme inhibitor activity	molecular_function	0.22174	1	46	2387	523	29181	PGSC0003DMG400010139,PGSC0003DMG400021168,PGSC0003DMG402006496,PGSC0003DMG400022691,PGSC0003DMG400016284,PGSC0003DMG400029723,PGSC0003DMG400010145,PGSC0003DMG400004735,PGSC0003DMG400019574,PGSC0003DMG400010132,Novel03212,PGSC0003DMG400000292,PGSC0003DMG400008873,PGSC0003DMG400014263,Novel02783,PGSC0003DMG400003731,PGSC0003DMG400017928,PGSC0003DMG400007667,PGSC0003DMG400032198,PGSC0003DMG400029308…
GO:0000287	magnesium ion binding	molecular_function	0.22322	1	33	2387	327	29181	PGSC0003DMG400019524,PGSC0003DMG400016997,PGSC0003DMG400010585,PGSC0003DMG400028560,PGSC0003DMG400024220,PGSC0003DMG400011777,PGSC0003DMG400010913,PGSC0003DMG400007963,PGSC0003DMG400011045,PGSC0003DMG400020053,PGSC0003DMG400023334,PGSC0003DMG400004312,PGSC0003DMG400011521,PGSC0003DMG400013309,PGSC0003DMG400018421,PGSC0003DMG400009873,PGSC0003DMG400024926,PGSC0003DMG400005675,PGSC0003DMG400001398,…
GO:1901677	phosphate transmembrane transporter activity	molecular_function	0.22323	1	4	2387	27	29181	PGSC0003DMG400001391,PGSC0003DMG400005612,PGSC0003DMG400024357,PGSC0003DMG400015447
GO:0050664	oxidoreductase activity, acting on NAD(P)H, oxygen as acceptor	molecular_function	0.22417	1	3	2387	17	29181	PGSC0003DMG401029813,PGSC0003DMG400032563,PGSC0003DMG400013550
GO:0016748	succinyltransferase activity	molecular_function	0.22446	1	3	2387	18	29181	PGSC0003DMG401018599,PGSC0003DMG400019717,PGSC0003DMG400026156
GO:1901505	carbohydrate derivative transporter activity	molecular_function	0.22453	1	6	2387	52	29181	PGSC0003DMG400024357,PGSC0003DMG400003111,PGSC0003DMG400021255,PGSC0003DMG400005612,PGSC0003DMG400011089,PGSC0003DMG400001391
GO:0015662	ATPase activity, coupled to transmembrane movement of ions, phosphorylative mechanism	molecular_function	0.2246	1	3	2387	20	29181	PGSC0003DMG400025610,PGSC0003DMG401023104,PGSC0003DMG402003606
GO:0008733	L-arabinose isomerase activity	molecular_function	0.22491	1	1	2387	3	29181	PGSC0003DMG400028826
GO:0051348	negative regulation of transferase activity	biological_process	0.22502	1	6	2387	47	29181	PGSC0003DMG400019455,PGSC0003DMG400022061,PGSC0003DMG400023478,PGSC0003DMG402013013,PGSC0003DMG400022209,PGSC0003DMG400008931
GO:0004749	ribose phosphate diphosphokinase activity	molecular_function	0.22529	1	2	2387	11	29181	PGSC0003DMG400030870,PGSC0003DMG402021921
GO:0008287	protein serine/threonine phosphatase complex	cellular_component	0.22542	1	4	2387	25	29181	PGSC0003DMG400017455,PGSC0003DMG400000695,Novel03408,PGSC0003DMG401027561
GO:1903293	phosphatase complex	cellular_component	0.22542	1	4	2387	25	29181	PGSC0003DMG400017455,PGSC0003DMG400000695,Novel03408,PGSC0003DMG401027561
GO:0048308	organelle inheritance	biological_process	0.22581	1	6	2387	51	29181	PGSC0003DMG400017655,PGSC0003DMG400027534,PGSC0003DMG400000434,PGSC0003DMG400011359,PGSC0003DMG400022061,PGSC0003DMG400000498
GO:0015171	amino acid transmembrane transporter activity	molecular_function	0.22583	1	8	2387	64	29181	Novel00688,PGSC0003DMG400024609,PGSC0003DMG400005455,PGSC0003DMG400010438,PGSC0003DMG400030519,Novel03229,PGSC0003DMG400010866,PGSC0003DMG400004061
GO:0051181	cofactor transport	biological_process	0.22688	1	9	2387	79	29181	PGSC0003DMG400019253,PGSC0003DMG400025029,PGSC0003DMG400017751,PGSC0003DMG400003777,PGSC0003DMG400003807,PGSC0003DMG400023478,PGSC0003DMG400013457,PGSC0003DMG400000001,PGSC0003DMG400022893
GO:0009452	7-methylguanosine RNA capping	biological_process	0.22782	1	5	2387	39	29181	PGSC0003DMG402029795,PGSC0003DMG400003614,PGSC0003DMG400018107,PGSC0003DMG401025427,PGSC0003DMG400030849
GO:0036260	RNA capping	biological_process	0.22782	1	5	2387	39	29181	PGSC0003DMG400018107,PGSC0003DMG400030849,PGSC0003DMG401025427,PGSC0003DMG402029795,PGSC0003DMG400003614
GO:0000726	non-recombinational repair	biological_process	0.22791	1	5	2387	39	29181	PGSC0003DMG400024481,PGSC0003DMG400003581,PGSC0003DMG401020784,PGSC0003DMG400012761,PGSC0003DMG400004415
GO:0052652	cyclic purine nucleotide metabolic process	biological_process	0.22837	1	3	2387	19	29181	PGSC0003DMG402020303,PGSC0003DMG400031029,PGSC0003DMG400018516
GO:0006721	terpenoid metabolic process	biological_process	0.22863	1	13	2387	110	29181	PGSC0003DMG400029626,PGSC0003DMG400006854,PGSC0003DMG400006822,PGSC0003DMG400022232,PGSC0003DMG400014873,PGSC0003DMG400004020,Novel01333,Novel03299,PGSC0003DMG400004168,PGSC0003DMG400004844,PGSC0003DMG403026842,PGSC0003DMG400019257,PGSC0003DMG400001117
GO:0016114	terpenoid biosynthetic process	biological_process	0.22863	1	13	2387	110	29181	PGSC0003DMG400004020,PGSC0003DMG400014873,PGSC0003DMG400022232,PGSC0003DMG400006822,PGSC0003DMG400006854,PGSC0003DMG400029626,PGSC0003DMG400001117,PGSC0003DMG400019257,PGSC0003DMG403026842,PGSC0003DMG400004844,PGSC0003DMG400004168,Novel03299,Novel01333
GO:2001141	regulation of RNA biosynthetic process	biological_process	0.22928	1	316	2387	3569	29181	PGSC0003DMG400030410,PGSC0003DMG400014709,PGSC0003DMG402000927,PGSC0003DMG400028001,PGSC0003DMG400025436,PGSC0003DMG400037029,Novel00239,PGSC0003DMG400027599,PGSC0003DMG402002771,PGSC0003DMG400011022,PGSC0003DMG400008248,PGSC0003DMG400005213,PGSC0003DMG400002383,PGSC0003DMG400019647,PGSC0003DMG400027036,PGSC0003DMG400001469,PGSC0003DMG400007496,PGSC0003DMG402029813,PGSC0003DMG400033569,PGSC0003DM…
GO:0008063	Toll signaling pathway	biological_process	0.23048	1	1	2387	3	29181	PGSC0003DMG400016769
GO:0032990	cell part morphogenesis	biological_process	0.23049	1	9	2387	74	29181	PGSC0003DMG400030663,PGSC0003DMG400013949,PGSC0003DMG400027703,PGSC0003DMG400029165,PGSC0003DMG400019615,PGSC0003DMG400016465,PGSC0003DMG400016811,PGSC0003DMG400000394,PGSC0003DMG400016389
GO:0048858	cell projection morphogenesis	biological_process	0.23049	1	9	2387	74	29181	PGSC0003DMG400016811,PGSC0003DMG400000394,PGSC0003DMG400016389,PGSC0003DMG400030663,PGSC0003DMG400013949,PGSC0003DMG400027703,PGSC0003DMG400029165,PGSC0003DMG400019615,PGSC0003DMG400016465
GO:0000154	rRNA modification	biological_process	0.23176	1	4	2387	28	29181	PGSC0003DMG400003614,PGSC0003DMG400000343,PGSC0003DMG401003285,PGSC0003DMG400013424
GO:0031167	rRNA methylation	biological_process	0.23176	1	4	2387	28	29181	PGSC0003DMG400013424,PGSC0003DMG401003285,PGSC0003DMG400000343,PGSC0003DMG400003614
GO:0006260	DNA replication	biological_process	0.2326	1	94	2387	1012	29181	PGSC0003DMG400009981,PGSC0003DMG400001398,PGSC0003DMG401013540,PGSC0003DMG400012711,PGSC0003DMG400019824,PGSC0003DMG400028520,PGSC0003DMG400025861,PGSC0003DMG402029813,PGSC0003DMG400007496,PGSC0003DMG400019647,Novel00287,PGSC0003DMG402031196,PGSC0003DMG400025511,PGSC0003DMG400014974,PGSC0003DMG401002242,PGSC0003DMG400001246,PGSC0003DMG400018222,Novel00239,PGSC0003DMG400022027,PGSC0003DMG401020784…
GO:0015718	monocarboxylic acid transport	biological_process	0.23332	1	5	2387	42	29181	PGSC0003DMG400012523,PGSC0003DMG402019176,PGSC0003DMG400011000,PGSC0003DMG400009290,PGSC0003DMG400004162
GO:0070071	proton-transporting two-sector ATPase complex assembly	biological_process	0.23383	1	4	2387	32	29181	PGSC0003DMG400026185,PGSC0003DMG401026931,PGSC0003DMG400017474,PGSC0003DMG400019398
GO:0003006	developmental process involved in reproduction	biological_process	0.23445	1	10	2387	93	29181	PGSC0003DMG402009663,PGSC0003DMG400010413,PGSC0003DMG400016544,PGSC0003DMG401024930,PGSC0003DMG400006086,PGSC0003DMG400022315,PGSC0003DMG400002231,PGSC0003DMG400004349,PGSC0003DMG400021659,PGSC0003DMG400003581
GO:0008171	O-methyltransferase activity	molecular_function	0.23452	1	15	2387	144	29181	PGSC0003DMG400002773,PGSC0003DMG400003614,PGSC0003DMG400010119,Novel03182,PGSC0003DMG400004949,PGSC0003DMG400017552,PGSC0003DMG400000434,PGSC0003DMG401003285,PGSC0003DMG400000343,PGSC0003DMG400000582,PGSC0003DMG401026272,Novel01810,PGSC0003DMG400015226,PGSC0003DMG400021254,PGSC0003DMG400023836
GO:0010970	microtubule-based transport	biological_process	0.23502	1	1	2387	4	29181	PGSC0003DMG400000042
GO:0030705	cytoskeleton-dependent intracellular transport	biological_process	0.23502	1	1	2387	4	29181	PGSC0003DMG400000042
GO:0042073	intraciliary transport	biological_process	0.23502	1	1	2387	4	29181	PGSC0003DMG400000042
GO:0016634	oxidoreductase activity, acting on the CH-CH group of donors, oxygen as acceptor	molecular_function	0.23589	1	3	2387	18	29181	PGSC0003DMG400027002,PGSC0003DMG400011264,PGSC0003DMG400020620
GO:0008963	phospho-N-acetylmuramoyl-pentapeptide-transferase activity	molecular_function	0.23678	1	2	2387	11	29181	PGSC0003DMG402021159,PGSC0003DMG400009960
GO:0044260	cellular macromolecule metabolic process	biological_process	0.23684	1	945	2387	10829	29181	PGSC0003DMG400028345,PGSC0003DMG400024571,Novel01048,PGSC0003DMG400010572,PGSC0003DMG400025320,PGSC0003DMG400028229,PGSC0003DMG400019083,PGSC0003DMG400004036,PGSC0003DMG400034672,PGSC0003DMG400023593,PGSC0003DMG400016198,Novel02713,PGSC0003DMG400025806,Novel01584,PGSC0003DMG400025472,PGSC0003DMG400015225,Novel01623,PGSC0003DMG400042481,PGSC0003DMG402027032,PGSC0003DMG400009941,PGSC0003DMG40001301…
GO:0046983	protein dimerization activity	molecular_function	0.237	1	63	2387	734	29181	PGSC0003DMG400022027,PGSC0003DMG400028578,PGSC0003DMG400004087,PGSC0003DMG400000062,Novel03067,PGSC0003DMG401002242,Novel02284,PGSC0003DMG400028737,PGSC0003DMG400018222,PGSC0003DMG400016608,PGSC0003DMG400012237,PGSC0003DMG400021240,PGSC0003DMG401020784,PGSC0003DMG400021282,PGSC0003DMG400020976,Novel03630,PGSC0003DMG400017552,PGSC0003DMG400026164,PGSC0003DMG400019861,PGSC0003DMG400016203,PGSC0003D…
GO:0048522	positive regulation of cellular process	biological_process	0.23701	1	44	2387	478	29181	PGSC0003DMG402021193,PGSC0003DMG400016820,PGSC0003DMG400030663,Novel00308,PGSC0003DMG400008259,Novel03367,PGSC0003DMG400030318,PGSC0003DMG400021607,PGSC0003DMG400012554,PGSC0003DMG400030519,PGSC0003DMG400027204,Novel00738,PGSC0003DMG400029547,PGSC0003DMG400003880,PGSC0003DMG402011364,PGSC0003DMG400030849,PGSC0003DMG400020484,Novel03379,PGSC0003DMG400021659,PGSC0003DMG401002542,PGSC0003DMG40102756…
GO:0003746	translation elongation factor activity	molecular_function	0.23942	1	9	2387	77	29181	PGSC0003DMG400002045,PGSC0003DMG400030519,PGSC0003DMG400003564,PGSC0003DMG400022893,Novel00814,PGSC0003DMG402028565,PGSC0003DMG400003138,PGSC0003DMG400007717,PGSC0003DMG402002977
GO:0009317	acetyl-CoA carboxylase complex	cellular_component	0.23971	1	3	2387	21	29181	PGSC0003DMG402025863,PGSC0003DMG400026534,PGSC0003DMG400022027
GO:0017013	protein flavinylation	biological_process	0.24022	1	1	2387	3	29181	PGSC0003DMG400024887
GO:0004789	thiamine-phosphate diphosphorylase activity	molecular_function	0.24027	1	2	2387	10	29181	PGSC0003DMG401023772,PGSC0003DMG400006483
GO:0001510	RNA methylation	biological_process	0.24053	1	10	2387	87	29181	PGSC0003DMG400019734,PGSC0003DMG400015226,PGSC0003DMG400013424,PGSC0003DMG400018107,PGSC0003DMG401003285,PGSC0003DMG401025427,PGSC0003DMG400000343,PGSC0003DMG402029795,PGSC0003DMG400010119,PGSC0003DMG400003614
GO:0030695	GTPase regulator activity	molecular_function	0.24093	1	16	2387	155	29181	PGSC0003DMG400025029,PGSC0003DMG400016608,PGSC0003DMG400025436,PGSC0003DMG402005259,PGSC0003DMG401011001,PGSC0003DMG400005633,PGSC0003DMG400015251,PGSC0003DMG400000615,PGSC0003DMG400026364,PGSC0003DMG400016203,PGSC0003DMG400028520,PGSC0003DMG400009098,PGSC0003DMG400017515,PGSC0003DMG400019824,PGSC0003DMG400017485,PGSC0003DMG400025610
GO:0072594	establishment of protein localization to organelle	biological_process	0.24107	1	38	2387	383	29181	PGSC0003DMG400024365,PGSC0003DMG400031248,PGSC0003DMG400032104,PGSC0003DMG401010181,PGSC0003DMG400024914,PGSC0003DMG400010619,PGSC0003DMG400003647,PGSC0003DMG402029267,PGSC0003DMG400021177,PGSC0003DMG400025994,PGSC0003DMG401015043,PGSC0003DMG400024126,PGSC0003DMG400001417,Novel01810,PGSC0003DMG400022061,PGSC0003DMG401016933,Novel02118,PGSC0003DMG400021282,PGSC0003DMG403026842,PGSC0003DMG402000927…
GO:0004869	cysteine-type endopeptidase inhibitor activity	molecular_function	0.24189	1	5	2387	46	29181	PGSC0003DMG400029086,PGSC0003DMG400022691,PGSC0003DMG400017928,PGSC0003DMG400005455,PGSC0003DMG401001531
GO:0033014	tetrapyrrole biosynthetic process	biological_process	0.24256	1	34	2387	347	29181	PGSC0003DMG400045083,PGSC0003DMG400029879,PGSC0003DMG400014782,PGSC0003DMG400010413,PGSC0003DMG400007496,PGSC0003DMG400017572,PGSC0003DMG400011264,PGSC0003DMG400003540,PGSC0003DMG400032110,PGSC0003DMG402004821,PGSC0003DMG400024752,PGSC0003DMG400004542,PGSC0003DMG402020115,PGSC0003DMG400023636,PGSC0003DMG400009016,PGSC0003DMG400007012,PGSC0003DMG400013638,PGSC0003DMG400020422,PGSC0003DMG400014873,…
GO:0003856	3-dehydroquinate synthase activity	molecular_function	0.24294	1	1	2387	4	29181	PGSC0003DMG400021311
GO:0042440	pigment metabolic process	biological_process	0.24505	1	28	2387	274	29181	PGSC0003DMG402004821,PGSC0003DMG400006708,PGSC0003DMG402028252,PGSC0003DMG400018437,PGSC0003DMG400006822,PGSC0003DMG400017572,PGSC0003DMG400006854,PGSC0003DMG400013638,PGSC0003DMG400024886,PGSC0003DMG400007169,PGSC0003DMG400004168,PGSC0003DMG400028389,Novel01333,PGSC0003DMG402020115,PGSC0003DMG400031849,PGSC0003DMG400004020,PGSC0003DMG400014873,PGSC0003DMG400004933,PGSC0003DMG400045083,PGSC0003DM…
GO:0072525	pyridine-containing compound biosynthetic process	biological_process	0.24617	1	6	2387	46	29181	PGSC0003DMG400019734,PGSC0003DMG400010913,PGSC0003DMG400006483,PGSC0003DMG400019717,PGSC0003DMG400000112,PGSC0003DMG400018194
GO:0007127	meiosis I	biological_process	0.24669	1	9	2387	78	29181	Novel00780,PGSC0003DMG400012947,PGSC0003DMG400013550,PGSC0003DMG400012795,PGSC0003DMG400021629,PGSC0003DMG400000836,PGSC0003DMG400033031,PGSC0003DMG400017744,PGSC0003DMG400002021
GO:0018537	coenzyme F420-dependent N5,N10-methenyltetrahydromethanopterin reductase activity	molecular_function	0.24743	1	2	2387	12	29181	PGSC0003DMG400021546,PGSC0003DMG401002858
GO:0046995	oxidoreductase activity, acting on hydrogen as donor, with other known acceptors	molecular_function	0.24743	1	2	2387	12	29181	PGSC0003DMG400021546,PGSC0003DMG401002858
GO:0047068	N5,N10-methenyltetrahydromethanopterin hydrogenase activity	molecular_function	0.24743	1	2	2387	12	29181	PGSC0003DMG401002858,PGSC0003DMG400021546
GO:0030054	cell junction	cellular_component	0.24858	1	7	2387	57	29181	PGSC0003DMG400015392,PGSC0003DMG400027328,PGSC0003DMG400025519,PGSC0003DMG400031765,PGSC0003DMG400010334,PGSC0003DMG400026211,PGSC0003DMG400028826
GO:0044723	single-organism carbohydrate metabolic process	biological_process	0.24875	1	82	2387	852	29181	PGSC0003DMG400029792,PGSC0003DMG401000287,PGSC0003DMG400014944,PGSC0003DMG400002773,PGSC0003DMG400030897,PGSC0003DMG401014557,Novel02174,Novel02532,PGSC0003DMG400030849,PGSC0003DMG400020785,PGSC0003DMG402027860,PGSC0003DMG400008259,PGSC0003DMG400021214,PGSC0003DMG400013857,PGSC0003DMG400027449,PGSC0003DMG400022352,PGSC0003DMG400024220,PGSC0003DMG400010913,PGSC0003DMG400010691,PGSC0003DMG400027321…
GO:0008657	DNA topoisomerase (ATP-hydrolyzing) inhibitor activity	molecular_function	0.24932	1	2	2387	11	29181	PGSC0003DMG402006496,PGSC0003DMG400020827
GO:0072586	DNA topoisomerase (ATP-hydrolyzing) regulator activity	molecular_function	0.24932	1	2	2387	11	29181	PGSC0003DMG400020827,PGSC0003DMG402006496
GO:0042816	vitamin B6 metabolic process	biological_process	0.24934	1	3	2387	21	29181	PGSC0003DMG400000112,PGSC0003DMG400006483,PGSC0003DMG400019717
GO:0042819	vitamin B6 biosynthetic process	biological_process	0.24934	1	3	2387	21	29181	PGSC0003DMG400019717,PGSC0003DMG400006483,PGSC0003DMG400000112
GO:0015399	primary active transmembrane transporter activity	molecular_function	0.25019	1	26	2387	256	29181	PGSC0003DMG402029631,PGSC0003DMG400031248,PGSC0003DMG400020740,PGSC0003DMG400003906,PGSC0003DMG400018427,PGSC0003DMG400007353,PGSC0003DMG400026643,PGSC0003DMG400000615,PGSC0003DMG400022825,PGSC0003DMG401023104,PGSC0003DMG400023910,PGSC0003DMG400027155,PGSC0003DMG400005943,PGSC0003DMG400010691,PGSC0003DMG400012425,PGSC0003DMG400012677,PGSC0003DMG402014462,Novel00898,PGSC0003DMG400007092,PGSC0003DM…
GO:0015405	P-P-bond-hydrolysis-driven transmembrane transporter activity	molecular_function	0.25019	1	26	2387	256	29181	PGSC0003DMG400012425,PGSC0003DMG400012677,Novel00898,PGSC0003DMG402014462,PGSC0003DMG402003606,PGSC0003DMG400007092,PGSC0003DMG400022417,PGSC0003DMG400025610,PGSC0003DMG400014208,PGSC0003DMG400005256,PGSC0003DMG400006726,PGSC0003DMG400003078,PGSC0003DMG402029631,PGSC0003DMG400031248,PGSC0003DMG400020740,PGSC0003DMG400003906,PGSC0003DMG400018427,PGSC0003DMG400007353,PGSC0003DMG400026643,PGSC0003DM…
GO:0004568	chitinase activity	molecular_function	0.25042	1	3	2387	21	29181	PGSC0003DMG402024871,PGSC0003DMG400031217,Novel01597
GO:0045444	fat cell differentiation	biological_process	0.25056	1	3	2387	23	29181	PGSC0003DMG400023636,PGSC0003DMG400005904,PGSC0003DMG400023012
GO:0003872	6-phosphofructokinase activity	molecular_function	0.25064	1	3	2387	18	29181	Novel01389,PGSC0003DMG400019734,PGSC0003DMG400010007
GO:0033647	host intracellular organelle	cellular_component	0.25097	1	17	2387	169	29181	PGSC0003DMG400022860,PGSC0003DMG400018107,PGSC0003DMG400006975,PGSC0003DMG400031256,PGSC0003DMG400003906,PGSC0003DMG400001246,PGSC0003DMG400023334,PGSC0003DMG400033030,PGSC0003DMG400010620,PGSC0003DMG400003103,PGSC0003DMG400021719,PGSC0003DMG400028276,PGSC0003DMG400027534,PGSC0003DMG401026447,PGSC0003DMG400009981,PGSC0003DMG400022345,PGSC0003DMG400005484
GO:0033648	host intracellular membrane-bounded organelle	cellular_component	0.25097	1	17	2387	169	29181	PGSC0003DMG400003906,PGSC0003DMG400031256,PGSC0003DMG400006975,PGSC0003DMG400018107,PGSC0003DMG400022860,PGSC0003DMG400033030,PGSC0003DMG400010620,PGSC0003DMG400023334,PGSC0003DMG400001246,PGSC0003DMG400028276,PGSC0003DMG400003103,PGSC0003DMG400021719,PGSC0003DMG400005484,PGSC0003DMG401026447,PGSC0003DMG400009981,PGSC0003DMG400027534,PGSC0003DMG400022345
GO:0005135	interleukin-3 receptor binding	molecular_function	0.25219	1	2	2387	12	29181	PGSC0003DMG400012991,PGSC0003DMG400000695
GO:0042886	amide transport	biological_process	0.25232	1	5	2387	39	29181	PGSC0003DMG400028989,PGSC0003DMG400011414,PGSC0003DMG400023710,PGSC0003DMG400025515,PGSC0003DMG400009821
GO:0003013	circulatory system process	biological_process	0.25271	1	5	2387	37	29181	PGSC0003DMG400019142,PGSC0003DMG400014708,PGSC0003DMG400003581,PGSC0003DMG402002262,PGSC0003DMG402026306
GO:0003018	vascular process in circulatory system	biological_process	0.25271	1	5	2387	37	29181	PGSC0003DMG400014708,PGSC0003DMG400019142,PGSC0003DMG402002262,PGSC0003DMG400003581,PGSC0003DMG402026306
GO:0008015	blood circulation	biological_process	0.25271	1	5	2387	37	29181	PGSC0003DMG402002262,PGSC0003DMG400003581,PGSC0003DMG400019142,PGSC0003DMG400014708,PGSC0003DMG402026306
GO:0035150	regulation of tube size	biological_process	0.25271	1	5	2387	37	29181	PGSC0003DMG400014708,PGSC0003DMG400019142,PGSC0003DMG400003581,PGSC0003DMG402002262,PGSC0003DMG402026306
GO:0050880	regulation of blood vessel size	biological_process	0.25271	1	5	2387	37	29181	PGSC0003DMG400019142,PGSC0003DMG400014708,PGSC0003DMG400003581,PGSC0003DMG402002262,PGSC0003DMG402026306
GO:1903522	regulation of blood circulation	biological_process	0.25271	1	5	2387	37	29181	PGSC0003DMG402002262,PGSC0003DMG400003581,PGSC0003DMG400019142,PGSC0003DMG400014708,PGSC0003DMG402026306
GO:0016877	ligase activity, forming carbon-sulfur bonds	molecular_function	0.25287	1	7	2387	56	29181	PGSC0003DMG400032154,PGSC0003DMG400030951,Novel01303,PGSC0003DMG400013949,PGSC0003DMG400015268,PGSC0003DMG400022209,PGSC0003DMG400019634
GO:0008237	metallopeptidase activity	molecular_function	0.25293	1	27	2387	263	29181	PGSC0003DMG400000836,PGSC0003DMG400024236,PGSC0003DMG400021095,PGSC0003DMG400028548,PGSC0003DMG400008401,PGSC0003DMG400001512,PGSC0003DMG400018427,PGSC0003DMG400018243,PGSC0003DMG400001634,PGSC0003DMG400004149,PGSC0003DMG400019348,PGSC0003DMG400000112,PGSC0003DMG403019589,PGSC0003DMG400016778,PGSC0003DMG400017473,PGSC0003DMG400023402,PGSC0003DMG400006829,PGSC0003DMG401001693,PGSC0003DMG400016646,…
GO:0016994	precorrin-6A reductase activity	molecular_function	0.25311	1	1	2387	4	29181	PGSC0003DMG400022418
GO:0006635	fatty acid beta-oxidation	biological_process	0.25313	1	3	2387	18	29181	PGSC0003DMG400020620,PGSC0003DMG400027192,PGSC0003DMG400027002
GO:0009062	fatty acid catabolic process	biological_process	0.25313	1	3	2387	18	29181	PGSC0003DMG400020620,PGSC0003DMG400027192,PGSC0003DMG400027002
GO:0019395	fatty acid oxidation	biological_process	0.25313	1	3	2387	18	29181	PGSC0003DMG400020620,PGSC0003DMG400027002,PGSC0003DMG400027192
GO:0034440	lipid oxidation	biological_process	0.25313	1	3	2387	18	29181	PGSC0003DMG400027192,PGSC0003DMG400027002,PGSC0003DMG400020620
GO:0030955	potassium ion binding	molecular_function	0.25321	1	4	2387	30	29181	PGSC0003DMG400027321,PGSC0003DMG400010913,Novel02920,PGSC0003DMG400024220
GO:0031420	alkali metal ion binding	molecular_function	0.25321	1	4	2387	30	29181	PGSC0003DMG400027321,Novel02920,PGSC0003DMG400010913,PGSC0003DMG400024220
GO:0007275	multicellular organismal development	biological_process	0.25521	1	43	2387	458	29181	PGSC0003DMG401032194,PGSC0003DMG400016465,PGSC0003DMG400027964,PGSC0003DMG400028924,PGSC0003DMG401024930,PGSC0003DMG400013949,PGSC0003DMG400016389,PGSC0003DMG400030559,PGSC0003DMG400029792,PGSC0003DMG400010710,PGSC0003DMG402015928,PGSC0003DMG400003849,PGSC0003DMG400019615,PGSC0003DMG400021123,PGSC0003DMG400027703,PGSC0003DMG400016544,PGSC0003DMG400011801,PGSC0003DMG400016019,PGSC0003DMG400030663,…
GO:0006304	DNA modification	biological_process	0.25541	1	22	2387	224	29181	PGSC0003DMG400004312,PGSC0003DMG400021659,PGSC0003DMG400028229,PGSC0003DMG401015876,PGSC0003DMG400009321,PGSC0003DMG400014694,PGSC0003DMG400009072,PGSC0003DMG402029795,PGSC0003DMG400009016,PGSC0003DMG400004252,PGSC0003DMG400019574,PGSC0003DMG400030963,PGSC0003DMG400010798,PGSC0003DMG400027051,PGSC0003DMG400003653,PGSC0003DMG400032269,PGSC0003DMG400017691,PGSC0003DMG400028560,Novel01584,PGSC0003DM…
GO:0043414	macromolecule methylation	biological_process	0.256	1	20	2387	194	29181	PGSC0003DMG400002773,PGSC0003DMG402029795,PGSC0003DMG400017552,PGSC0003DMG400018107,PGSC0003DMG401003285,PGSC0003DMG401025427,PGSC0003DMG400000343,PGSC0003DMG400015226,PGSC0003DMG400009321,PGSC0003DMG400010119,PGSC0003DMG400003614,Novel01584,PGSC0003DMG402002977,PGSC0003DMG400013424,PGSC0003DMG402002262,PGSC0003DMG400027051,PGSC0003DMG400032269,PGSC0003DMG400004710,PGSC0003DMG400019734,PGSC0003DM…
GO:0048609	multicellular organismal reproductive process	biological_process	0.25646	1	15	2387	144	29181	PGSC0003DMG400027192,PGSC0003DMG400000836,PGSC0003DMG400033031,PGSC0003DMG400016544,PGSC0003DMG400010413,PGSC0003DMG400030478,PGSC0003DMG400031130,PGSC0003DMG400029546,PGSC0003DMG400014873,PGSC0003DMG401013540,PGSC0003DMG400032166,PGSC0003DMG400002231,PGSC0003DMG400013550,PGSC0003DMG400006086,PGSC0003DMG400021629
GO:0004359	glutaminase activity	molecular_function	0.25793	1	2	2387	13	29181	PGSC0003DMG400019717,PGSC0003DMG400000112
GO:0006625	protein targeting to peroxisome	biological_process	0.25948	1	3	2387	23	29181	PGSC0003DMG400001391,PGSC0003DMG400006457,PGSC0003DMG401010181
GO:0043574	peroxisomal transport	biological_process	0.25948	1	3	2387	23	29181	PGSC0003DMG401010181,PGSC0003DMG400006457,PGSC0003DMG400001391
GO:0072662	protein localization to peroxisome	biological_process	0.25948	1	3	2387	23	29181	PGSC0003DMG401010181,PGSC0003DMG400006457,PGSC0003DMG400001391
GO:0072663	establishment of protein localization to peroxisome	biological_process	0.25948	1	3	2387	23	29181	PGSC0003DMG400001391,PGSC0003DMG400006457,PGSC0003DMG401010181
GO:1901362	organic cyclic compound biosynthetic process	biological_process	0.26017	1	476	2387	5473	29181	PGSC0003DMG400005040,PGSC0003DMG400009475,PGSC0003DMG400019513,PGSC0003DMG400025373,PGSC0003DMG400023557,PGSC0003DMG400029545,PGSC0003DMG401027166,PGSC0003DMG402026306,PGSC0003DMG400021287,PGSC0003DMG400030637,PGSC0003DMG401006188,PGSC0003DMG400018421,PGSC0003DMG400021422,PGSC0003DMG400026534,PGSC0003DMG400008734,Novel00444,PGSC0003DMG400013949,PGSC0003DMG400014873,PGSC0003DMG400009303,Novel00360…
GO:0016286	small conductance calcium-activated potassium channel activity	molecular_function	0.26038	1	2	2387	11	29181	PGSC0003DMG402007034,PGSC0003DMG403002548
GO:0019904	protein domain specific binding	molecular_function	0.26182	1	2	2387	11	29181	PGSC0003DMG400007182,PGSC0003DMG400009730
GO:0006955	immune response	biological_process	0.26184	1	31	2387	333	29181	PGSC0003DMG400015253,PGSC0003DMG400020170,PGSC0003DMG400000399,PGSC0003DMG400018939,PGSC0003DMG400017570,PGSC0003DMG400025545,PGSC0003DMG401023104,Novel01770,PGSC0003DMG402026306,PGSC0003DMG400014316,PGSC0003DMG400007062,PGSC0003DMG401002242,PGSC0003DMG400012991,PGSC0003DMG400000695,PGSC0003DMG400002992,PGSC0003DMG400017946,Novel00308,PGSC0003DMG401014575,PGSC0003DMG400000646,PGSC0003DMG402032252…
GO:0015649	2-keto-3-deoxygluconate:proton symporter activity	molecular_function	0.26255	1	1	2387	3	29181	PGSC0003DMG400012523
GO:0046411	2-keto-3-deoxygluconate transport	biological_process	0.26255	1	1	2387	3	29181	PGSC0003DMG400012523
GO:0042626	ATPase activity, coupled to transmembrane movement of substances	molecular_function	0.26308	1	23	2387	228	29181	PGSC0003DMG400031248,PGSC0003DMG402029631,PGSC0003DMG400020740,PGSC0003DMG400003906,PGSC0003DMG400007353,PGSC0003DMG400026643,PGSC0003DMG400000615,PGSC0003DMG400018427,PGSC0003DMG400005943,PGSC0003DMG400010691,PGSC0003DMG401023104,PGSC0003DMG400022825,PGSC0003DMG400023910,PGSC0003DMG400027155,PGSC0003DMG400012425,PGSC0003DMG402014462,PGSC0003DMG402003606,PGSC0003DMG400007092,PGSC0003DMG400012677,…
GO:0043492	ATPase activity, coupled to movement of substances	molecular_function	0.26308	1	23	2387	228	29181	PGSC0003DMG402014462,PGSC0003DMG402003606,PGSC0003DMG400007092,PGSC0003DMG400012677,PGSC0003DMG400012425,PGSC0003DMG400003078,PGSC0003DMG400005256,PGSC0003DMG400022417,PGSC0003DMG400025610,PGSC0003DMG400020740,PGSC0003DMG400003906,PGSC0003DMG400031248,PGSC0003DMG402029631,PGSC0003DMG400005943,PGSC0003DMG400010691,PGSC0003DMG401023104,PGSC0003DMG400023910,PGSC0003DMG400022825,PGSC0003DMG400027155,…
GO:0016820	hydrolase activity, acting on acid anhydrides, catalyzing transmembrane movement of substances	molecular_function	0.26326	1	32	2387	320	29181	PGSC0003DMG400007092,PGSC0003DMG400012425,PGSC0003DMG400005256,PGSC0003DMG400010616,PGSC0003DMG400021253,PGSC0003DMG400016459,PGSC0003DMG400031248,PGSC0003DMG400027155,PGSC0003DMG400023910,PGSC0003DMG401023104,PGSC0003DMG401011206,PGSC0003DMG400000615,PGSC0003DMG400026643,PGSC0003DMG400007353,PGSC0003DMG400018427,PGSC0003DMG402003606,PGSC0003DMG402014462,PGSC0003DMG400012677,PGSC0003DMG400018516,…
GO:0008716	D-alanine-D-alanine ligase activity	molecular_function	0.26343	1	2	2387	10	29181	PGSC0003DMG400024886,PGSC0003DMG402019352
GO:0003855	3-dehydroquinate dehydratase activity	molecular_function	0.26484	1	3	2387	19	29181	PGSC0003DMG400015817,PGSC0003DMG400015546,PGSC0003DMG400004542
GO:0019203	carbohydrate phosphatase activity	molecular_function	0.26515	1	4	2387	29	29181	PGSC0003DMG400024109,PGSC0003DMG400021341,PGSC0003DMG400010413,PGSC0003DMG400033584
GO:0050308	sugar-phosphatase activity	molecular_function	0.26515	1	4	2387	29	29181	PGSC0003DMG400024109,PGSC0003DMG400021341,PGSC0003DMG400033584,PGSC0003DMG400010413
GO:0022611	dormancy process	biological_process	0.26541	1	1	2387	3	29181	PGSC0003DMG401031045
GO:0042262	DNA protection	biological_process	0.26569	1	3	2387	21	29181	PGSC0003DMG400004071,PGSC0003DMG400004241,PGSC0003DMG400012711
GO:0070569	uridylyltransferase activity	molecular_function	0.26639	1	3	2387	19	29181	PGSC0003DMG400008259,PGSC0003DMG400003073,PGSC0003DMG401013333
GO:0031175	neuron projection development	biological_process	0.26773	1	8	2387	65	29181	PGSC0003DMG400030663,PGSC0003DMG400013949,PGSC0003DMG400029165,PGSC0003DMG400027703,PGSC0003DMG400019615,PGSC0003DMG400016465,PGSC0003DMG400000394,PGSC0003DMG400016389
GO:0048666	neuron development	biological_process	0.26773	1	8	2387	65	29181	PGSC0003DMG400016465,PGSC0003DMG400029165,PGSC0003DMG400027703,PGSC0003DMG400019615,PGSC0003DMG400013949,PGSC0003DMG400030663,PGSC0003DMG400000394,PGSC0003DMG400016389
GO:0004127	cytidylate kinase activity	molecular_function	0.26901	1	8	2387	66	29181	Novel02589,Novel01787,PGSC0003DMG402029631,PGSC0003DMG400015492,PGSC0003DMG400019081,PGSC0003DMG401000923,PGSC0003DMG400015506,PGSC0003DMG400016797
GO:0016125	sterol metabolic process	biological_process	0.26966	1	3	2387	20	29181	PGSC0003DMG400003564,PGSC0003DMG400003411,PGSC0003DMG400007379
GO:0019048	modulation by virus of host morphology or physiology	biological_process	0.27001	1	21	2387	200	29181	PGSC0003DMG400000209,PGSC0003DMG400012412,PGSC0003DMG400022345,PGSC0003DMG400032198,PGSC0003DMG400029308,PGSC0003DMG402021193,PGSC0003DMG400003760,PGSC0003DMG402003118,PGSC0003DMG400027521,PGSC0003DMG400005904,PGSC0003DMG400036779,PGSC0003DMG400008545,PGSC0003DMG400035689,PGSC0003DMG400020519,PGSC0003DMG400023943,PGSC0003DMG400009423,PGSC0003DMG400022860,PGSC0003DMG400006975,Novel03212,PGSC0003DM…
GO:0007586	digestion	biological_process	0.27011	1	4	2387	30	29181	PGSC0003DMG400001897,PGSC0003DMG400022094,PGSC0003DMG400030017,PGSC0003DMG400030243
GO:0048040	UDP-glucuronate decarboxylase activity	molecular_function	0.27016	1	2	2387	12	29181	PGSC0003DMG400024388,PGSC0003DMG402016772
GO:0047961	glycine N-acyltransferase activity	molecular_function	0.27089	1	1	2387	3	29181	PGSC0003DMG400025262
GO:0007276	gamete generation	biological_process	0.27135	1	13	2387	124	29181	PGSC0003DMG400030478,PGSC0003DMG400016544,PGSC0003DMG400010413,PGSC0003DMG400033031,PGSC0003DMG400000836,PGSC0003DMG400027192,PGSC0003DMG400021629,PGSC0003DMG400013550,PGSC0003DMG400006086,PGSC0003DMG400002231,PGSC0003DMG401013540,PGSC0003DMG400014873,PGSC0003DMG400029546
GO:0004871	signal transducer activity	molecular_function	0.27136	1	64	2387	672	29181	PGSC0003DMG400006086,PGSC0003DMG400025245,PGSC0003DMG400009914,PGSC0003DMG400022420,PGSC0003DMG400009103,Novel01267,PGSC0003DMG400015766,PGSC0003DMG400029473,PGSC0003DMG400003072,PGSC0003DMG400027438,PGSC0003DMG401027561,PGSC0003DMG400024266,Novel03299,PGSC0003DMG400023402,PGSC0003DMG400032154,PGSC0003DMG400020172,PGSC0003DMG400011479,PGSC0003DMG400009867,PGSC0003DMG400039300,PGSC0003DMG401024472…
GO:0008939	nicotinate-nucleotide-dimethylbenzimidazole phosphoribosyltransferase activity	molecular_function	0.27159	1	1	2387	3	29181	PGSC0003DMG400007496
GO:0008643	carbohydrate transport	biological_process	0.27211	1	18	2387	189	29181	PGSC0003DMG400023402,PGSC0003DMG400030100,PGSC0003DMG400009290,Novel03303,PGSC0003DMG400000209,PGSC0003DMG400012523,PGSC0003DMG400002132,PGSC0003DMG400017751,PGSC0003DMG400019514,PGSC0003DMG400009730,PGSC0003DMG400017570,PGSC0003DMG400009085,PGSC0003DMG400017610,PGSC0003DMG401019352,PGSC0003DMG400017572,PGSC0003DMG400001520,PGSC0003DMG400018781,PGSC0003DMG402002771
GO:0031490	chromatin DNA binding	molecular_function	0.2723	1	1	2387	3	29181	PGSC0003DMG400003564
GO:0031492	nucleosomal DNA binding	molecular_function	0.2723	1	1	2387	3	29181	PGSC0003DMG400003564
GO:0008324	cation transmembrane transporter activity	molecular_function	0.2727	1	136	2387	1538	29181	Novel00993,Novel02920,PGSC0003DMG400013632,PGSC0003DMG400003906,PGSC0003DMG400022770,PGSC0003DMG400023636,PGSC0003DMG400013142,PGSC0003DMG402003606,PGSC0003DMG400005213,PGSC0003DMG400025610,PGSC0003DMG400022093,PGSC0003DMG400028520,PGSC0003DMG400004233,PGSC0003DMG400017762,PGSC0003DMG400001123,PGSC0003DMG400005178,PGSC0003DMG400026534,PGSC0003DMG400010619,PGSC0003DMG402026306,PGSC0003DMG401027166…
GO:0008121	ubiquinol-cytochrome-c reductase activity	molecular_function	0.2733	1	8	2387	70	29181	PGSC0003DMG400005213,PGSC0003DMG402029307,PGSC0003DMG401020784,PGSC0003DMG400001123,PGSC0003DMG400001070,PGSC0003DMG400015579,PGSC0003DMG402020784,PGSC0003DMG400018168
GO:0016681	oxidoreductase activity, acting on diphenols and related substances as donors, cytochrome as acceptor	molecular_function	0.2733	1	8	2387	70	29181	PGSC0003DMG400001070,PGSC0003DMG400015579,PGSC0003DMG400018168,PGSC0003DMG402020784,PGSC0003DMG402029307,PGSC0003DMG400005213,PGSC0003DMG400001123,PGSC0003DMG401020784
GO:0008175	tRNA methyltransferase activity	molecular_function	0.27369	1	11	2387	100	29181	Novel03182,PGSC0003DMG400003882,PGSC0003DMG400010119,PGSC0003DMG400003614,PGSC0003DMG400023836,PGSC0003DMG400021659,PGSC0003DMG402032565,PGSC0003DMG400019734,PGSC0003DMG400015226,PGSC0003DMG400020053,PGSC0003DMG400022873
GO:0009496	plastoquinol--plastocyanin reductase activity	molecular_function	0.2748	1	2	2387	12	29181	PGSC0003DMG400019574,PGSC0003DMG400011772
GO:0052880	oxidoreductase activity, acting on diphenols and related substances as donors, with copper protein as acceptor	molecular_function	0.2748	1	2	2387	12	29181	PGSC0003DMG400019574,PGSC0003DMG400011772
GO:0032269	negative regulation of cellular protein metabolic process	biological_process	0.27536	1	11	2387	103	29181	PGSC0003DMG400019574,PGSC0003DMG400022209,PGSC0003DMG400018107,PGSC0003DMG402013013,PGSC0003DMG401007235,PGSC0003DMG400008931,PGSC0003DMG400022061,PGSC0003DMG400023478,PGSC0003DMG400025847,PGSC0003DMG400010438,PGSC0003DMG400019455
GO:0051248	negative regulation of protein metabolic process	biological_process	0.27536	1	11	2387	103	29181	PGSC0003DMG400008931,PGSC0003DMG400023478,PGSC0003DMG400022061,PGSC0003DMG400025847,PGSC0003DMG400019455,PGSC0003DMG400010438,PGSC0003DMG400019574,PGSC0003DMG400022209,PGSC0003DMG400018107,PGSC0003DMG402013013,PGSC0003DMG401007235
GO:0009072	aromatic amino acid family metabolic process	biological_process	0.27584	1	10	2387	88	29181	PGSC0003DMG402016226,PGSC0003DMG400026364,PGSC0003DMG400025374,PGSC0003DMG401002654,PGSC0003DMG400024889,Novel00393,PGSC0003DMG402000914,PGSC0003DMG400005361,PGSC0003DMG400015330,PGSC0003DMG400021311
GO:0005977	glycogen metabolic process	biological_process	0.27693	1	2	2387	11	29181	PGSC0003DMG400001998,Novel02306
GO:0005978	glycogen biosynthetic process	biological_process	0.27693	1	2	2387	11	29181	Novel02306,PGSC0003DMG400001998
GO:0009186	deoxyribonucleoside diphosphate metabolic process	biological_process	0.27708	1	2	2387	12	29181	PGSC0003DMG400023557,PGSC0003DMG400023569
GO:0033645	host cell endomembrane system	cellular_component	0.27739	1	2	2387	10	29181	PGSC0003DMG400022860,PGSC0003DMG400006975
GO:0044165	host cell endoplasmic reticulum	cellular_component	0.27739	1	2	2387	10	29181	PGSC0003DMG400006975,PGSC0003DMG400022860
GO:0044167	host cell endoplasmic reticulum membrane	cellular_component	0.27739	1	2	2387	10	29181	PGSC0003DMG400022860,PGSC0003DMG400006975
GO:0044385	integral to membrane of host cell	cellular_component	0.27739	1	2	2387	10	29181	PGSC0003DMG400006975,PGSC0003DMG400022860
GO:0044386	integral to host endoplasmic reticulum membrane	cellular_component	0.27739	1	2	2387	10	29181	PGSC0003DMG400006975,PGSC0003DMG400022860
GO:0038023	signaling receptor activity	molecular_function	0.27779	1	42	2387	425	29181	PGSC0003DMG400011479,PGSC0003DMG400031819,Novel03299,PGSC0003DMG400023402,PGSC0003DMG400032154,PGSC0003DMG400024266,PGSC0003DMG400029165,PGSC0003DMG400009867,Novel01267,PGSC0003DMG400004233,PGSC0003DMG400015766,PGSC0003DMG400022420,PGSC0003DMG400009914,PGSC0003DMG400025245,PGSC0003DMG400006086,PGSC0003DMG400027438,PGSC0003DMG400003072,PGSC0003DMG400029473,PGSC0003DMG400002564,PGSC0003DMG402029631…
GO:0009081	branched-chain amino acid metabolic process	biological_process	0.27786	1	5	2387	37	29181	PGSC0003DMG400028912,PGSC0003DMG400022770,PGSC0003DMG400006829,PGSC0003DMG400024915,PGSC0003DMG400018939
GO:0009082	branched-chain amino acid biosynthetic process	biological_process	0.27786	1	5	2387	37	29181	PGSC0003DMG400018939,PGSC0003DMG400024915,PGSC0003DMG400022770,PGSC0003DMG400006829,PGSC0003DMG400028912
GO:0048038	quinone binding	molecular_function	0.27805	1	6	2387	50	29181	PGSC0003DMG400013073,PGSC0003DMG400017157,PGSC0003DMG400017203,PGSC0003DMG400023306,PGSC0003DMG400004723,Novel00141
GO:0010948	negative regulation of cell cycle process	biological_process	0.27816	1	6	2387	54	29181	PGSC0003DMG400023478,PGSC0003DMG400022061,PGSC0003DMG400019455,PGSC0003DMG400022209,PGSC0003DMG400008931,PGSC0003DMG402013013
GO:0006879	cellular iron ion homeostasis	biological_process	0.27844	1	4	2387	32	29181	PGSC0003DMG400027119,PGSC0003DMG400024986,PGSC0003DMG400028320,PGSC0003DMG400006102
GO:0055072	iron ion homeostasis	biological_process	0.27844	1	4	2387	32	29181	PGSC0003DMG400028320,PGSC0003DMG400006102,PGSC0003DMG400027119,PGSC0003DMG400024986
GO:0030182	neuron differentiation	biological_process	0.28067	1	8	2387	67	29181	PGSC0003DMG400016465,PGSC0003DMG400019615,PGSC0003DMG400027703,PGSC0003DMG400029165,PGSC0003DMG400013949,PGSC0003DMG400030663,PGSC0003DMG400016389,PGSC0003DMG400000394
GO:0048699	generation of neurons	biological_process	0.28067	1	8	2387	67	29181	PGSC0003DMG400016389,PGSC0003DMG400000394,PGSC0003DMG400016465,PGSC0003DMG400019615,PGSC0003DMG400027703,PGSC0003DMG400029165,PGSC0003DMG400013949,PGSC0003DMG400030663
GO:0016579	protein deubiquitination	biological_process	0.2807	1	6	2387	50	29181	Novel02891,Novel02741,Novel02156,PGSC0003DMG401012197,PGSC0003DMG400013186,PGSC0003DMG400016646
GO:0070646	protein modification by small protein removal	biological_process	0.2807	1	6	2387	50	29181	Novel02891,Novel02741,Novel02156,PGSC0003DMG401012197,PGSC0003DMG400013186,PGSC0003DMG400016646
GO:0016657	oxidoreductase activity, acting on NAD(P)H, nitrogenous group as acceptor	molecular_function	0.28071	1	1	2387	3	29181	PGSC0003DMG400021644
GO:0033739	preQ1 synthase activity	molecular_function	0.28071	1	1	2387	3	29181	PGSC0003DMG400021644
GO:0016851	magnesium chelatase activity	molecular_function	0.28093	1	2	2387	11	29181	PGSC0003DMG400005410,PGSC0003DMG400016019
GO:0051002	ligase activity, forming nitrogen-metal bonds	molecular_function	0.28093	1	2	2387	11	29181	PGSC0003DMG400005410,PGSC0003DMG400016019
GO:0051003	ligase activity, forming nitrogen-metal bonds, forming coordination complexes	molecular_function	0.28093	1	2	2387	11	29181	PGSC0003DMG400005410,PGSC0003DMG400016019
GO:0017053	transcriptional repressor complex	cellular_component	0.28114	1	4	2387	29	29181	PGSC0003DMG400030899,PGSC0003DMG400011089,PGSC0003DMG400009905,PGSC0003DMG400027534
GO:0045132	meiotic chromosome segregation	biological_process	0.28186	1	6	2387	49	29181	PGSC0003DMG400013550,PGSC0003DMG400021629,PGSC0003DMG400002021,PGSC0003DMG400017691,PGSC0003DMG400033031,PGSC0003DMG400000836
GO:0000139	Golgi membrane	cellular_component	0.28215	1	14	2387	132	29181	PGSC0003DMG400023402,PGSC0003DMG400017751,PGSC0003DMG400002452,PGSC0003DMG400022381,PGSC0003DMG400000498,Novel03303,PGSC0003DMG401011206,PGSC0003DMG400000209,PGSC0003DMG400017572,PGSC0003DMG400001417,PGSC0003DMG400027344,PGSC0003DMG400002132,PGSC0003DMG400041458,PGSC0003DMG400018781
GO:0090304	nucleic acid metabolic process	biological_process	0.2832	1	637	2387	7340	29181	PGSC0003DMG400031375,PGSC0003DMG401003154,Novel00317,Novel03400,PGSC0003DMG400015533,PGSC0003DMG400015766,PGSC0003DMG400009103,PGSC0003DMG400030246,PGSC0003DMG400013401,PGSC0003DMG400024267,PGSC0003DMG400016679,PGSC0003DMG400012196,PGSC0003DMG400001520,PGSC0003DMG401015876,PGSC0003DMG400042507,PGSC0003DMG400015506,PGSC0003DMG400001766,PGSC0003DMG400039300,PGSC0003DMG400023434,PGSC0003DMG400011045…
GO:0071826	ribonucleoprotein complex subunit organization	biological_process	0.28346	1	4	2387	31	29181	PGSC0003DMG400012711,PGSC0003DMG400030365,PGSC0003DMG400003621,PGSC0003DMG400022027
GO:0005342	organic acid transmembrane transporter activity	molecular_function	0.28381	1	10	2387	91	29181	PGSC0003DMG400010866,PGSC0003DMG400012523,PGSC0003DMG400004061,PGSC0003DMG400005455,PGSC0003DMG400009290,PGSC0003DMG400010438,PGSC0003DMG400030519,Novel03229,PGSC0003DMG400024609,Novel00688
GO:0046943	carboxylic acid transmembrane transporter activity	molecular_function	0.28381	1	10	2387	91	29181	Novel00688,PGSC0003DMG400024609,PGSC0003DMG400010438,PGSC0003DMG400030519,Novel03229,PGSC0003DMG400005455,PGSC0003DMG400009290,PGSC0003DMG400004061,PGSC0003DMG400010866,PGSC0003DMG400012523
GO:0006952	defense response	biological_process	0.28412	1	73	2387	849	29181	PGSC0003DMG401024472,PGSC0003DMG400028229,PGSC0003DMG401015876,PGSC0003DMG400017142,PGSC0003DMG400031412,PGSC0003DMG400020519,PGSC0003DMG400009847,PGSC0003DMG400029194,PGSC0003DMG400030255,PGSC0003DMG400023799,PGSC0003DMG400002452,PGSC0003DMG400022860,PGSC0003DMG400012437,PGSC0003DMG400024984,PGSC0003DMG400000570,PGSC0003DMG400000602,PGSC0003DMG400030322,PGSC0003DMG400003661,Novel00151,PGSC0003DM…
GO:0072350	tricarboxylic acid metabolic process	biological_process	0.28429	1	7	2387	61	29181	PGSC0003DMG400020422,PGSC0003DMG400006129,PGSC0003DMG400003078,PGSC0003DMG402021921,PGSC0003DMG400042507,PGSC0003DMG402007138,PGSC0003DMG400030843
GO:0004222	metalloendopeptidase activity	molecular_function	0.28457	1	23	2387	227	29181	PGSC0003DMG400008728,PGSC0003DMG400009972,PGSC0003DMG400012947,PGSC0003DMG400012605,PGSC0003DMG400022345,PGSC0003DMG400027516,PGSC0003DMG400017528,PGSC0003DMG400016646,PGSC0003DMG401001693,PGSC0003DMG400006829,PGSC0003DMG400023402,PGSC0003DMG400017473,PGSC0003DMG403019589,PGSC0003DMG400000112,PGSC0003DMG400001634,PGSC0003DMG400018427,PGSC0003DMG400004149,PGSC0003DMG400018243,PGSC0003DMG400001512,…
GO:0048037	cofactor binding	molecular_function	0.28491	1	104	2387	1106	29181	PGSC0003DMG400006854,PGSC0003DMG400023557,PGSC0003DMG400025373,PGSC0003DMG400012701,PGSC0003DMG402011377,PGSC0003DMG400015253,PGSC0003DMG400025186,Novel00444,PGSC0003DMG400020620,Novel01333,PGSC0003DMG400013309,PGSC0003DMG401025427,PGSC0003DMG400014779,PGSC0003DMG400007992,Novel03328,PGSC0003DMG401003285,PGSC0003DMG400007169,PGSC0003DMG400004723,PGSC0003DMG402023002,PGSC0003DMG400017203,PGSC0003D…
GO:0009975	cyclase activity	molecular_function	0.28585	1	5	2387	38	29181	PGSC0003DMG400018516,PGSC0003DMG402027172,PGSC0003DMG400004607,PGSC0003DMG402020303,PGSC0003DMG400031029
GO:0007029	endoplasmic reticulum organization	biological_process	0.28597	1	8	2387	75	29181	PGSC0003DMG400011359,PGSC0003DMG400000434,PGSC0003DMG400017655,PGSC0003DMG400000498,PGSC0003DMG400022061,PGSC0003DMG400003581,PGSC0003DMG400027534,PGSC0003DMG400001520
GO:0072522	purine-containing compound biosynthetic process	biological_process	0.28612	1	36	2387	389	29181	PGSC0003DMG400004995,PGSC0003DMG400023636,PGSC0003DMG400020740,PGSC0003DMG400022770,PGSC0003DMG400003906,PGSC0003DMG400022825,PGSC0003DMG400023754,PGSC0003DMG400018516,PGSC0003DMG400032558,Novel03007,PGSC0003DMG400022417,PGSC0003DMG402020303,PGSC0003DMG400028924,PGSC0003DMG400017655,PGSC0003DMG400024886,PGSC0003DMG400007169,PGSC0003DMG400017116,PGSC0003DMG400031029,PGSC0003DMG400009353,PGSC0003DM…
GO:0006030	chitin metabolic process	biological_process	0.28736	1	5	2387	43	29181	Novel01122,PGSC0003DMG400031217,PGSC0003DMG402024871,PGSC0003DMG400027415,Novel01597
GO:1901071	glucosamine-containing compound metabolic process	biological_process	0.28736	1	5	2387	43	29181	PGSC0003DMG402024871,PGSC0003DMG400031217,Novel01122,Novel01597,PGSC0003DMG400027415
GO:0097367	carbohydrate derivative binding	molecular_function	0.28813	1	438	2387	4625	29181	PGSC0003DMG401018599,PGSC0003DMG400002537,PGSC0003DMG400022893,PGSC0003DMG400027204,PGSC0003DMG400026156,PGSC0003DMG400015330,PGSC0003DMG400004415,PGSC0003DMG400020422,Novel01235,PGSC0003DMG400007963,Novel00273,PGSC0003DMG402029267,PGSC0003DMG400005335,PGSC0003DMG400011777,PGSC0003DMG400021804,PGSC0003DMG400017946,PGSC0003DMG400002992,PGSC0003DMG400011414,PGSC0003DMG400027744,PGSC0003DMG401002542…
GO:0007126	meiotic nuclear division	biological_process	0.28843	1	10	2387	92	29181	Novel00780,PGSC0003DMG400012947,PGSC0003DMG400017691,PGSC0003DMG400013550,PGSC0003DMG400012795,PGSC0003DMG400021629,PGSC0003DMG400000836,PGSC0003DMG400033031,PGSC0003DMG400017744,PGSC0003DMG400002021
GO:1903046	meiotic cell cycle process	biological_process	0.28843	1	10	2387	92	29181	PGSC0003DMG400013550,PGSC0003DMG400012795,PGSC0003DMG400021629,PGSC0003DMG400012947,PGSC0003DMG400017691,Novel00780,PGSC0003DMG400017744,PGSC0003DMG400002021,PGSC0003DMG400033031,PGSC0003DMG400000836
GO:0006826	iron ion transport	biological_process	0.28888	1	14	2387	125	29181	Novel00993,PGSC0003DMG400038451,PGSC0003DMG400013632,PGSC0003DMG400000457,Novel00273,PGSC0003DMG400030425,PGSC0003DMG400005178,PGSC0003DMG400005744,PGSC0003DMG400025262,PGSC0003DMG400010619,PGSC0003DMG400023442,PGSC0003DMG400018427,PGSC0003DMG400020249,PGSC0003DMG400003319
GO:0015930	glutamate synthase activity	molecular_function	0.28952	1	3	2387	20	29181	PGSC0003DMG400021248,PGSC0003DMG400002593,PGSC0003DMG400015194
GO:0019075	virus maturation	biological_process	0.28978	1	1	2387	3	29181	PGSC0003DMG400006835
GO:0046797	viral procapsid maturation	biological_process	0.28978	1	1	2387	3	29181	PGSC0003DMG400006835
GO:0008200	ion channel inhibitor activity	molecular_function	0.28991	1	19	2387	203	29181	PGSC0003DMG401017546,PGSC0003DMG400022232,PGSC0003DMG400024752,PGSC0003DMG400023710,PGSC0003DMG400009353,PGSC0003DMG400023569,PGSC0003DMG400031029,PGSC0003DMG401024877,PGSC0003DMG400025738,PGSC0003DMG400009821,PGSC0003DMG400003975,PGSC0003DMG400003381,PGSC0003DMG400018875,PGSC0003DMG400027770,PGSC0003DMG400008563,PGSC0003DMG400011414,PGSC0003DMG400011175,PGSC0003DMG400024205,PGSC0003DMG400031821
GO:0016248	channel inhibitor activity	molecular_function	0.28991	1	19	2387	203	29181	PGSC0003DMG400022232,PGSC0003DMG400024752,PGSC0003DMG400023710,PGSC0003DMG400009353,PGSC0003DMG401017546,PGSC0003DMG400009821,PGSC0003DMG400003975,PGSC0003DMG400023569,PGSC0003DMG400031029,PGSC0003DMG401024877,PGSC0003DMG400025738,PGSC0003DMG400018875,PGSC0003DMG400027770,PGSC0003DMG400008563,PGSC0003DMG400003381,PGSC0003DMG400031821,PGSC0003DMG400011414,PGSC0003DMG400011175,PGSC0003DMG400024205
GO:0051225	spindle assembly	biological_process	0.29007	1	4	2387	31	29181	PGSC0003DMG401002977,PGSC0003DMG400016198,PGSC0003DMG400023607,PGSC0003DMG402002977
GO:0019208	phosphatase regulator activity	molecular_function	0.2902	1	5	2387	40	29181	PGSC0003DMG400000695,PGSC0003DMG400027449,PGSC0003DMG400017455,Novel03408,PGSC0003DMG401027561
GO:0008990	rRNA (guanine-N2-)-methyltransferase activity	molecular_function	0.29053	1	1	2387	4	29181	PGSC0003DMG400014268
GO:0016435	rRNA (guanine) methyltransferase activity	molecular_function	0.29053	1	1	2387	4	29181	PGSC0003DMG400014268
GO:0046916	cellular transition metal ion homeostasis	biological_process	0.29098	1	4	2387	33	29181	PGSC0003DMG400027119,PGSC0003DMG400024986,PGSC0003DMG400028320,PGSC0003DMG400006102
GO:0043419	urea catabolic process	biological_process	0.29143	1	1	2387	3	29181	PGSC0003DMG400001246
GO:0004517	nitric-oxide synthase activity	molecular_function	0.29189	1	1	2387	3	29181	PGSC0003DMG400021203
GO:0006809	nitric oxide biosynthetic process	biological_process	0.29189	1	1	2387	3	29181	PGSC0003DMG400021203
GO:0046209	nitric oxide metabolic process	biological_process	0.29189	1	1	2387	3	29181	PGSC0003DMG400021203
GO:1903409	reactive oxygen species biosynthetic process	biological_process	0.29189	1	1	2387	3	29181	PGSC0003DMG400021203
GO:0009165	nucleotide biosynthetic process	biological_process	0.2922	1	43	2387	468	29181	PGSC0003DMG400008065,PGSC0003DMG400007760,PGSC0003DMG401027166,PGSC0003DMG402026306,PGSC0003DMG400009353,PGSC0003DMG400020484,PGSC0003DMG400026643,PGSC0003DMG400017116,PGSC0003DMG400031029,PGSC0003DMG400018194,PGSC0003DMG400028924,PGSC0003DMG400001896,PGSC0003DMG400017655,PGSC0003DMG400014217,PGSC0003DMG400025519,PGSC0003DMG400021341,PGSC0003DMG400005256,PGSC0003DMG400030100,PGSC0003DMG400021607,…
GO:1901293	nucleoside phosphate biosynthetic process	biological_process	0.2922	1	43	2387	468	29181	PGSC0003DMG400008065,PGSC0003DMG401027166,PGSC0003DMG400007760,PGSC0003DMG402026306,PGSC0003DMG400009353,PGSC0003DMG400026643,PGSC0003DMG400020484,PGSC0003DMG400031029,PGSC0003DMG400017116,PGSC0003DMG400018194,PGSC0003DMG400001896,PGSC0003DMG400028924,PGSC0003DMG400017655,PGSC0003DMG400021341,PGSC0003DMG400005256,PGSC0003DMG400025519,PGSC0003DMG400014217,PGSC0003DMG400021607,PGSC0003DMG400030100,…
GO:0018216	peptidyl-arginine methylation	biological_process	0.29223	1	1	2387	4	29181	PGSC0003DMG402002977
GO:0034969	histone arginine methylation	biological_process	0.29223	1	1	2387	4	29181	PGSC0003DMG402002977
GO:0043985	histone H4-R3 methylation	biological_process	0.29223	1	1	2387	4	29181	PGSC0003DMG402002977
GO:0009605	response to external stimulus	biological_process	0.29267	1	60	2387	646	29181	PGSC0003DMG400027703,PGSC0003DMG400001858,PGSC0003DMG400019615,PGSC0003DMG400007242,PGSC0003DMG400024508,PGSC0003DMG400030663,PGSC0003DMG402021193,PGSC0003DMG400013857,PGSC0003DMG400018875,PGSC0003DMG402020784,PGSC0003DMG400030115,PGSC0003DMG400004723,PGSC0003DMG400024926,PGSC0003DMG400001099,PGSC0003DMG400015075,PGSC0003DMG400016465,Novel01891,PGSC0003DMG400021421,PGSC0003DMG400013949,PGSC0003DM…
GO:0003924	GTPase activity	molecular_function	0.29299	1	56	2387	553	29181	PGSC0003DMG400007353,PGSC0003DMG400020484,PGSC0003DMG400002231,PGSC0003DMG400007013,PGSC0003DMG400035738,PGSC0003DMG400026226,PGSC0003DMG400003647,PGSC0003DMG400009699,PGSC0003DMG400031248,PGSC0003DMG400015128,PGSC0003DMG400005178,PGSC0003DMG400023536,PGSC0003DMG401007575,PGSC0003DMG400005744,PGSC0003DMG400014225,PGSC0003DMG400025262,PGSC0003DMG400016797,PGSC0003DMG400009303,PGSC0003DMG400003319,…
GO:0010467	gene expression	biological_process	0.29308	1	583	2387	6800	29181	PGSC0003DMG400030758,PGSC0003DMG400020139,Novel00814,PGSC0003DMG402027860,PGSC0003DMG400022713,PGSC0003DMG402019668,PGSC0003DMG400015494,PGSC0003DMG400017567,Novel02174,PGSC0003DMG400028335,PGSC0003DMG400023977,PGSC0003DMG400000345,PGSC0003DMG400028276,PGSC0003DMG402002262,PGSC0003DMG400032555,PGSC0003DMG400014917,PGSC0003DMG400043560,PGSC0003DMG400003614,PGSC0003DMG400046044,PGSC0003DMG400003072…
GO:0006732	coenzyme metabolic process	biological_process	0.2932	1	42	2387	430	29181	PGSC0003DMG400010007,PGSC0003DMG400015766,PGSC0003DMG400021343,PGSC0003DMG400024701,PGSC0003DMG400007496,PGSC0003DMG400006483,Novel02627,PGSC0003DMG400024772,PGSC0003DMG402011372,PGSC0003DMG400015392,PGSC0003DMG400018369,PGSC0003DMG400027321,PGSC0003DMG400008871,PGSC0003DMG400000112,PGSC0003DMG400026493,PGSC0003DMG400010691,PGSC0003DMG400024571,PGSC0003DMG400027925,Novel01389,PGSC0003DMG400028666…
GO:0008984	protein-glutamate methylesterase activity	molecular_function	0.29332	1	1	2387	4	29181	PGSC0003DMG400003503
GO:0051723	protein methylesterase activity	molecular_function	0.29332	1	1	2387	4	29181	PGSC0003DMG400003503
GO:0016226	iron-sulfur cluster assembly	biological_process	0.2938	1	6	2387	53	29181	PGSC0003DMG400030758,PGSC0003DMG400003882,PGSC0003DMG400008367,PGSC0003DMG400016484,PGSC0003DMG400007242,Novel02198
GO:0031163	metallo-sulfur cluster assembly	biological_process	0.2938	1	6	2387	53	29181	PGSC0003DMG400003882,PGSC0003DMG400030758,PGSC0003DMG400016484,PGSC0003DMG400008367,PGSC0003DMG400007242,Novel02198
GO:0051156	glucose 6-phosphate metabolic process	biological_process	0.29442	1	2	2387	13	29181	PGSC0003DMG400018369,PGSC0003DMG400021199
GO:0016818	hydrolase activity, acting on acid anhydrides, in phosphorus-containing anhydrides	molecular_function	0.29458	1	173	2387	1853	29181	PGSC0003DMG402029631,PGSC0003DMG400004750,PGSC0003DMG403026842,Novel02118,PGSC0003DMG400008801,PGSC0003DMG402014864,Novel00622,PGSC0003DMG400014875,PGSC0003DMG400008871,PGSC0003DMG400010157,PGSC0003DMG400004087,PGSC0003DMG400011264,PGSC0003DMG400026493,Novel03410,PGSC0003DMG400005943,PGSC0003DMG400031026,PGSC0003DMG400016823,PGSC0003DMG400018116,PGSC0003DMG402002262,PGSC0003DMG400020172,PGSC0003D…
GO:0042803	protein homodimerization activity	molecular_function	0.29464	1	15	2387	148	29181	Novel02285,PGSC0003DMG401020784,PGSC0003DMG400033569,PGSC0003DMG400004723,PGSC0003DMG400032104,PGSC0003DMG400021282,Novel03367,PGSC0003DMG400022027,PGSC0003DMG400000498,PGSC0003DMG400032573,PGSC0003DMG400022061,PGSC0003DMG400002400,PGSC0003DMG400018222,PGSC0003DMG401002242,PGSC0003DMG400027438
GO:0043484	regulation of RNA splicing	biological_process	0.29575	1	3	2387	23	29181	PGSC0003DMG400004995,PGSC0003DMG400001417,PGSC0003DMG400032104
GO:0048024	regulation of mRNA splicing, via spliceosome	biological_process	0.29575	1	3	2387	23	29181	PGSC0003DMG400004995,PGSC0003DMG400001417,PGSC0003DMG400032104
GO:0050684	regulation of mRNA processing	biological_process	0.29575	1	3	2387	23	29181	PGSC0003DMG400032104,PGSC0003DMG400004995,PGSC0003DMG400001417
GO:1903311	regulation of mRNA metabolic process	biological_process	0.29575	1	3	2387	23	29181	PGSC0003DMG400032104,PGSC0003DMG400001417,PGSC0003DMG400004995
GO:2001057	reactive nitrogen species metabolic process	biological_process	0.29654	1	3	2387	19	29181	PGSC0003DMG400000457,PGSC0003DMG400030212,PGSC0003DMG400021203
GO:0007349	cellularization	biological_process	0.29664	1	2	2387	13	29181	PGSC0003DMG400016544,PGSC0003DMG400010413
GO:0016817	hydrolase activity, acting on acid anhydrides	molecular_function	0.29727	1	190	2387	2043	29181	PGSC0003DMG400000331,PGSC0003DMG402029267,PGSC0003DMG400011777,PGSC0003DMG400003625,Novel00273,PGSC0003DMG400010119,PGSC0003DMG400044006,PGSC0003DMG401018599,PGSC0003DMG400004415,PGSC0003DMG400015492,PGSC0003DMG400031248,PGSC0003DMG400023536,PGSC0003DMG400032104,PGSC0003DMG400014225,PGSC0003DMG400007353,PGSC0003DMG400002217,PGSC0003DMG400006034,PGSC0003DMG400038020,PGSC0003DMG401011206,PGSC0003DM…
GO:0033013	tetrapyrrole metabolic process	biological_process	0.29752	1	42	2387	445	29181	PGSC0003DMG400004542,PGSC0003DMG402020115,PGSC0003DMG400023636,PGSC0003DMG400031849,PGSC0003DMG400009016,PGSC0003DMG400007012,PGSC0003DMG400013638,PGSC0003DMG400017572,PGSC0003DMG400011264,PGSC0003DMG400003540,PGSC0003DMG400006708,PGSC0003DMG400032110,PGSC0003DMG402004821,PGSC0003DMG400024752,PGSC0003DMG400010413,PGSC0003DMG400007496,PGSC0003DMG400045083,PGSC0003DMG400029879,PGSC0003DMG400014782,…
GO:0015276	ligand-gated ion channel activity	molecular_function	0.29871	1	12	2387	121	29181	PGSC0003DMG400026534,PGSC0003DMG400030758,PGSC0003DMG400009085,PGSC0003DMG400026518,PGSC0003DMG401029997,PGSC0003DMG400009914,PGSC0003DMG400006327,PGSC0003DMG400005154,PGSC0003DMG400003632,PGSC0003DMG401024472,Novel01525,PGSC0003DMG400005638
GO:0022834	ligand-gated channel activity	molecular_function	0.29871	1	12	2387	121	29181	PGSC0003DMG400030758,PGSC0003DMG400026534,PGSC0003DMG400009085,PGSC0003DMG401024472,PGSC0003DMG400003632,PGSC0003DMG400006327,PGSC0003DMG400009914,PGSC0003DMG400005154,PGSC0003DMG400026518,PGSC0003DMG401029997,PGSC0003DMG400005638,Novel01525
GO:0051087	chaperone binding	molecular_function	0.29893	1	8	2387	76	29181	PGSC0003DMG400007062,PGSC0003DMG400027438,PGSC0003DMG400002400,PGSC0003DMG400000498,PGSC0003DMG400004723,PGSC0003DMG400042669,PGSC0003DMG401020784,PGSC0003DMG400023607
GO:0005092	GDP-dissociation inhibitor activity	molecular_function	0.29941	1	2	2387	12	29181	PGSC0003DMG400015251,PGSC0003DMG400017485
GO:0005094	Rho GDP-dissociation inhibitor activity	molecular_function	0.29941	1	2	2387	12	29181	PGSC0003DMG400015251,PGSC0003DMG400017485
GO:0072593	reactive oxygen species metabolic process	biological_process	0.29955	1	3	2387	24	29181	PGSC0003DMG400016647,PGSC0003DMG400021203,PGSC0003DMG400002400
GO:0016558	protein import into peroxisome matrix	biological_process	0.30017	1	2	2387	15	29181	PGSC0003DMG401010181,PGSC0003DMG400006457
GO:0016560	protein import into peroxisome matrix, docking	biological_process	0.30017	1	2	2387	15	29181	PGSC0003DMG401010181,PGSC0003DMG400006457
GO:0022615	protein to membrane docking	biological_process	0.30017	1	2	2387	15	29181	PGSC0003DMG401010181,PGSC0003DMG400006457
GO:0006082	organic acid metabolic process	biological_process	0.30059	1	130	2387	1386	29181	PGSC0003DMG400008477,PGSC0003DMG400006822,PGSC0003DMG400012239,PGSC0003DMG400003906,PGSC0003DMG400022770,Novel02246,PGSC0003DMG400010334,PGSC0003DMG402029257,PGSC0003DMG400015194,PGSC0003DMG400021311,PGSC0003DMG400001398,PGSC0003DMG400005675,PGSC0003DMG400024915,PGSC0003DMG401002654,PGSC0003DMG400012193,PGSC0003DMG400015392,PGSC0003DMG400027192,PGSC0003DMG400010338,PGSC0003DMG400016778,PGSC0003DM…
GO:0090305	nucleic acid phosphodiester bond hydrolysis	biological_process	0.30062	1	4	2387	32	29181	PGSC0003DMG400001766,PGSC0003DMG400028345,Novel00780,PGSC0003DMG400002200
GO:0022008	neurogenesis	biological_process	0.30067	1	8	2387	69	29181	PGSC0003DMG400013949,PGSC0003DMG400030663,PGSC0003DMG400016465,PGSC0003DMG400027703,PGSC0003DMG400029165,PGSC0003DMG400019615,PGSC0003DMG400000394,PGSC0003DMG400016389
GO:0002682	regulation of immune system process	biological_process	0.3008	1	11	2387	106	29181	PGSC0003DMG400020519,PGSC0003DMG400025700,PGSC0003DMG400027204,PGSC0003DMG400003319,PGSC0003DMG400022860,PGSC0003DMG400006975,PGSC0003DMG400000399,PGSC0003DMG400023799,PGSC0003DMG400015253,PGSC0003DMG400020170,Novel00308
GO:0004061	arylformamidase activity	molecular_function	0.30124	1	1	2387	5	29181	Novel00393
GO:0004181	metallocarboxypeptidase activity	molecular_function	0.30137	1	1	2387	4	29181	PGSC0003DMG400019348
GO:0008028	monocarboxylic acid transmembrane transporter activity	molecular_function	0.30168	1	2	2387	12	29181	PGSC0003DMG400012523,PGSC0003DMG400009290
GO:0051028	mRNA transport	biological_process	0.302	1	12	2387	118	29181	PGSC0003DMG400017655,PGSC0003DMG400000434,PGSC0003DMG400028320,PGSC0003DMG400003111,PGSC0003DMG400011359,PGSC0003DMG400027534,PGSC0003DMG400017743,PGSC0003DMG400005799,PGSC0003DMG400019455,PGSC0003DMG400004162,PGSC0003DMG400000498,PGSC0003DMG400022061
GO:0031419	cobalamin binding	molecular_function	0.30232	1	4	2387	31	29181	PGSC0003DMG400020708,PGSC0003DMG400018564,PGSC0003DMG400032792,PGSC0003DMG400000583
GO:0050830	defense response to Gram-positive bacterium	biological_process	0.30266	1	4	2387	33	29181	PGSC0003DMG400015075,PGSC0003DMG400021421,PGSC0003DMG400014836,PGSC0003DMG400013022
GO:0000075	cell cycle checkpoint	biological_process	0.30298	1	9	2387	84	29181	PGSC0003DMG400008931,PGSC0003DMG400020541,PGSC0003DMG400023478,PGSC0003DMG400022061,PGSC0003DMG400019455,PGSC0003DMG400022209,PGSC0003DMG400017570,PGSC0003DMG402013013,Novel03396
GO:0009187	cyclic nucleotide metabolic process	biological_process	0.30346	1	4	2387	33	29181	PGSC0003DMG400018516,PGSC0003DMG400031029,PGSC0003DMG402020303,PGSC0003DMG400030100
GO:0005343	organic acid:sodium symporter activity	molecular_function	0.30398	1	2	2387	14	29181	PGSC0003DMG400004061,PGSC0003DMG400030519
GO:0033178	proton-transporting two-sector ATPase complex, catalytic domain	cellular_component	0.30417	1	14	2387	140	29181	PGSC0003DMG400026643,PGSC0003DMG400022417,PGSC0003DMG400000172,PGSC0003DMG400005256,PGSC0003DMG400025519,PGSC0003DMG400022825,PGSC0003DMG400000663,PGSC0003DMG400014217,PGSC0003DMG401011206,PGSC0003DMG400010616,PGSC0003DMG400018516,PGSC0003DMG400009912,PGSC0003DMG400003906,PGSC0003DMG400020740
GO:0044030	regulation of DNA methylation	biological_process	0.30426	1	2	2387	16	29181	PGSC0003DMG400009321,PGSC0003DMG400032269
GO:0008173	RNA methyltransferase activity	molecular_function	0.30444	1	16	2387	157	29181	PGSC0003DMG400015226,PGSC0003DMG402032565,PGSC0003DMG400021659,PGSC0003DMG400020053,PGSC0003DMG400014268,PGSC0003DMG400000343,PGSC0003DMG400030849,PGSC0003DMG400003882,PGSC0003DMG400019734,PGSC0003DMG400023836,PGSC0003DMG400001350,PGSC0003DMG400022873,PGSC0003DMG400013424,PGSC0003DMG400010119,Novel03182,PGSC0003DMG400003614
GO:0030493	bacteriochlorophyll metabolic process	biological_process	0.30451	1	3	2387	21	29181	PGSC0003DMG400018437,PGSC0003DMG400017572,PGSC0003DMG402020115
GO:0030494	bacteriochlorophyll biosynthetic process	biological_process	0.30451	1	3	2387	21	29181	PGSC0003DMG400018437,PGSC0003DMG400017572,PGSC0003DMG402020115
GO:0008312	7S RNA binding	molecular_function	0.30485	1	5	2387	41	29181	PGSC0003DMG400018116,PGSC0003DMG400008871,PGSC0003DMG400021177,PGSC0003DMG400024126,PGSC0003DMG401015043
GO:0048500	signal recognition particle	cellular_component	0.30485	1	5	2387	41	29181	PGSC0003DMG400018116,PGSC0003DMG400008871,PGSC0003DMG400021177,PGSC0003DMG400024126,PGSC0003DMG401015043
GO:1901615	organic hydroxy compound metabolic process	biological_process	0.3053	1	13	2387	132	29181	PGSC0003DMG400006483,PGSC0003DMG400019717,PGSC0003DMG400015650,PGSC0003DMG400010413,PGSC0003DMG400003411,PGSC0003DMG400027916,PGSC0003DMG400001398,PGSC0003DMG401000287,PGSC0003DMG400003747,PGSC0003DMG400001998,PGSC0003DMG400007379,PGSC0003DMG400003564,PGSC0003DMG400000112
GO:0018130	heterocycle biosynthetic process	biological_process	0.30531	1	460	2387	5322	29181	PGSC0003DMG400023478,PGSC0003DMG401023772,PGSC0003DMG400019824,PGSC0003DMG400001434,PGSC0003DMG400007408,PGSC0003DMG400023754,PGSC0003DMG400025751,PGSC0003DMG400027594,PGSC0003DMG400016892,PGSC0003DMG400027326,PGSC0003DMG400020317,PGSC0003DMG400017572,PGSC0003DMG400022027,PGSC0003DMG402002635,PGSC0003DMG400004289,PGSC0003DMG400019693,PGSC0003DMG400007678,PGSC0003DMG400024752,PGSC0003DMG400013280,…
GO:0000221	vacuolar proton-transporting V-type ATPase, V1 domain	cellular_component	0.30607	1	5	2387	37	29181	PGSC0003DMG400000663,PGSC0003DMG400010616,PGSC0003DMG401011206,PGSC0003DMG400018516,PGSC0003DMG400009912
GO:0016471	vacuolar proton-transporting V-type ATPase complex	cellular_component	0.30607	1	5	2387	37	29181	PGSC0003DMG400000663,PGSC0003DMG400010616,PGSC0003DMG401011206,PGSC0003DMG400009912,PGSC0003DMG400018516
GO:0005125	cytokine activity	molecular_function	0.30629	1	8	2387	85	29181	PGSC0003DMG400007092,PGSC0003DMG400006295,PGSC0003DMG400025545,PGSC0003DMG400016459,PGSC0003DMG402032252,PGSC0003DMG400026428,PGSC0003DMG400004243,PGSC0003DMG400007062
GO:0051205	protein insertion into membrane	biological_process	0.30667	1	6	2387	53	29181	PGSC0003DMG400023525,PGSC0003DMG400005839,PGSC0003DMG400000401,PGSC0003DMG400033053,PGSC0003DMG400003581,PGSC0003DMG400001520
GO:0005922	connexon complex	cellular_component	0.30685	1	1	2387	5	29181	PGSC0003DMG400026211
GO:0009200	deoxyribonucleoside triphosphate metabolic process	biological_process	0.30707	1	2	2387	12	29181	PGSC0003DMG400004814,PGSC0003DMG402004751
GO:0009211	pyrimidine deoxyribonucleoside triphosphate metabolic process	biological_process	0.30707	1	2	2387	12	29181	PGSC0003DMG400004814,PGSC0003DMG402004751
GO:0046080	dUTP metabolic process	biological_process	0.30707	1	2	2387	12	29181	PGSC0003DMG400004814,PGSC0003DMG402004751
GO:0046658	anchored component of plasma membrane	cellular_component	0.30719	1	1	2387	5	29181	PGSC0003DMG400021546
GO:0010923	negative regulation of phosphatase activity	biological_process	0.30738	1	1	2387	4	29181	PGSC0003DMG401007235
GO:0035305	negative regulation of dephosphorylation	biological_process	0.30738	1	1	2387	4	29181	PGSC0003DMG401007235
GO:0035308	negative regulation of protein dephosphorylation	biological_process	0.30738	1	1	2387	4	29181	PGSC0003DMG401007235
GO:0031625	ubiquitin protein ligase binding	molecular_function	0.30786	1	3	2387	23	29181	PGSC0003DMG400014708,PGSC0003DMG400018437,PGSC0003DMG400006555
GO:0044389	ubiquitin-like protein ligase binding	molecular_function	0.30786	1	3	2387	23	29181	PGSC0003DMG400006555,PGSC0003DMG400014708,PGSC0003DMG400018437
GO:0004000	adenosine deaminase activity	molecular_function	0.3082	1	2	2387	13	29181	PGSC0003DMG400024915,PGSC0003DMG400015281
GO:0007423	sensory organ development	biological_process	0.30822	1	1	2387	4	29181	PGSC0003DMG400031026
GO:0006281	DNA repair	biological_process	0.30902	1	80	2387	839	29181	PGSC0003DMG403026842,PGSC0003DMG402029631,PGSC0003DMG400015506,PGSC0003DMG400019083,PGSC0003DMG400019124,PGSC0003DMG402014864,PGSC0003DMG402016772,PGSC0003DMG400005633,PGSC0003DMG400016198,PGSC0003DMG400004071,PGSC0003DMG401024472,Novel02713,PGSC0003DMG400006814,PGSC0003DMG400026493,PGSC0003DMG400030311,PGSC0003DMG402002262,PGSC0003DMG401003154,PGSC0003DMG400023513,PGSC0003DMG400019087,PGSC0003DM…
GO:0015716	organic phosphonate transport	biological_process	0.30933	1	1	2387	4	29181	PGSC0003DMG402015928
GO:0022904	respiratory electron transport chain	biological_process	0.31039	1	13	2387	130	29181	PGSC0003DMG400020497,PGSC0003DMG400030714,PGSC0003DMG400016820,PGSC0003DMG400027693,PGSC0003DMG400033566,PGSC0003DMG400020962,PGSC0003DMG400000367,PGSC0003DMG401029267,PGSC0003DMG400024914,PGSC0003DMG400029615,PGSC0003DMG400035389,PGSC0003DMG400013550,PGSC0003DMG400028578
GO:0017119	Golgi transport complex	cellular_component	0.31188	1	6	2387	50	29181	PGSC0003DMG400021282,PGSC0003DMG400008571,PGSC0003DMG400020827,PGSC0003DMG400017570,PGSC0003DMG400025065,PGSC0003DMG400011728
GO:0006754	ATP biosynthetic process	biological_process	0.31269	1	25	2387	273	29181	PGSC0003DMG401027166,PGSC0003DMG402026306,PGSC0003DMG400008065,PGSC0003DMG400022825,PGSC0003DMG400026643,PGSC0003DMG400020484,PGSC0003DMG400009353,PGSC0003DMG400003906,PGSC0003DMG400022770,PGSC0003DMG400020740,PGSC0003DMG400017655,PGSC0003DMG400028924,PGSC0003DMG400021607,PGSC0003DMG400005256,PGSC0003DMG400025519,PGSC0003DMG400014217,PGSC0003DMG400022893,PGSC0003DMG400022417,Novel03007,PGSC0003DM…
GO:0019899	enzyme binding	molecular_function	0.31272	1	15	2387	144	29181	PGSC0003DMG400013949,PGSC0003DMG401007235,PGSC0003DMG400009912,PGSC0003DMG400000434,PGSC0003DMG400014708,PGSC0003DMG400031310,PGSC0003DMG400007030,PGSC0003DMG400018107,PGSC0003DMG400000498,PGSC0003DMG400016892,PGSC0003DMG400006555,PGSC0003DMG400026641,PGSC0003DMG400005102,PGSC0003DMG400018437,PGSC0003DMG400027770
GO:0007264	small GTPase mediated signal transduction	biological_process	0.31333	1	29	2387	306	29181	PGSC0003DMG400005744,PGSC0003DMG400019203,PGSC0003DMG400025262,Novel02038,PGSC0003DMG400009699,Novel00993,PGSC0003DMG400031248,PGSC0003DMG400025259,PGSC0003DMG400030425,PGSC0003DMG400028001,PGSC0003DMG402029631,PGSC0003DMG400026226,PGSC0003DMG402031196,PGSC0003DMG400010944,PGSC0003DMG400002980,PGSC0003DMG400000932,PGSC0003DMG400008393,PGSC0003DMG401001693,PGSC0003DMG400016822,PGSC0003DMG400020172…
GO:0016832	aldehyde-lyase activity	molecular_function	0.31402	1	5	2387	42	29181	Novel01209,PGSC0003DMG402027860,PGSC0003DMG400004312,PGSC0003DMG400034531,PGSC0003DMG400032241
GO:0015985	energy coupled proton transport, down electrochemical gradient	biological_process	0.31472	1	23	2387	252	29181	PGSC0003DMG400032558,PGSC0003DMG400013106,PGSC0003DMG400007092,PGSC0003DMG400005926,PGSC0003DMG400022417,Novel03007,PGSC0003DMG400022893,PGSC0003DMG400013857,PGSC0003DMG402019176,PGSC0003DMG400021607,PGSC0003DMG400005256,PGSC0003DMG400017655,PGSC0003DMG400028924,PGSC0003DMG400020740,PGSC0003DMG400022770,PGSC0003DMG400003906,PGSC0003DMG400020484,PGSC0003DMG400026643,PGSC0003DMG400009353,PGSC0003DM…
GO:0015986	ATP synthesis coupled proton transport	biological_process	0.31472	1	23	2387	252	29181	PGSC0003DMG400008065,PGSC0003DMG400022825,PGSC0003DMG402026306,PGSC0003DMG401027166,PGSC0003DMG400009353,PGSC0003DMG400026643,PGSC0003DMG400020484,PGSC0003DMG400003906,PGSC0003DMG400022770,PGSC0003DMG400020740,PGSC0003DMG400028924,PGSC0003DMG400017655,PGSC0003DMG400005256,PGSC0003DMG400021607,PGSC0003DMG402019176,PGSC0003DMG400013857,PGSC0003DMG400022893,PGSC0003DMG400022417,Novel03007,PGSC0003DM…
GO:0043043	peptide biosynthetic process	biological_process	0.31541	1	137	2387	1592	29181	PGSC0003DMG400016852,PGSC0003DMG400010572,PGSC0003DMG400000457,PGSC0003DMG400016679,PGSC0003DMG400004912,PGSC0003DMG400022232,PGSC0003DMG400028229,PGSC0003DMG400014444,Novel00317,PGSC0003DMG400005466,PGSC0003DMG400002757,PGSC0003DMG400002287,PGSC0003DMG402027032,PGSC0003DMG400042481,PGSC0003DMG400024986,Novel03043,PGSC0003DMG400016465,PGSC0003DMG400027323,PGSC0003DMG400025811,PGSC0003DMG400015232…
GO:0006066	alcohol metabolic process	biological_process	0.31546	1	9	2387	80	29181	PGSC0003DMG400015650,PGSC0003DMG400003411,PGSC0003DMG400010413,PGSC0003DMG400027916,PGSC0003DMG401000287,PGSC0003DMG400003747,PGSC0003DMG400001998,PGSC0003DMG400007379,PGSC0003DMG400003564
GO:2001070	starch binding	molecular_function	0.31565	1	3	2387	23	29181	Novel01414,PGSC0003DMG400034307,PGSC0003DMG400016613
GO:0050662	coenzyme binding	molecular_function	0.31607	1	82	2387	885	29181	PGSC0003DMG401002685,PGSC0003DMG400015128,PGSC0003DMG400028389,PGSC0003DMG400004814,PGSC0003DMG400003880,PGSC0003DMG400022312,PGSC0003DMG401024871,PGSC0003DMG401027256,PGSC0003DMG400003625,PGSC0003DMG400019257,PGSC0003DMG400019825,PGSC0003DMG400011222,PGSC0003DMG400017211,Novel00443,PGSC0003DMG400024508,PGSC0003DMG400012797,PGSC0003DMG400011801,PGSC0003DMG400021254,PGSC0003DMG400019718,PGSC0003DM…
GO:0001525	angiogenesis	biological_process	0.31609	1	3	2387	23	29181	PGSC0003DMG400010710,PGSC0003DMG402012256,PGSC0003DMG400031007
GO:0001568	blood vessel development	biological_process	0.31609	1	3	2387	23	29181	PGSC0003DMG400031007,PGSC0003DMG400010710,PGSC0003DMG402012256
GO:0001944	vasculature development	biological_process	0.31609	1	3	2387	23	29181	PGSC0003DMG400031007,PGSC0003DMG402012256,PGSC0003DMG400010710
GO:0045765	regulation of angiogenesis	biological_process	0.31609	1	3	2387	23	29181	PGSC0003DMG400010710,PGSC0003DMG402012256,PGSC0003DMG400031007
GO:0048514	blood vessel morphogenesis	biological_process	0.31609	1	3	2387	23	29181	PGSC0003DMG400031007,PGSC0003DMG402012256,PGSC0003DMG400010710
GO:0072358	cardiovascular system development	biological_process	0.31609	1	3	2387	23	29181	PGSC0003DMG400010710,PGSC0003DMG402012256,PGSC0003DMG400031007
GO:0072359	circulatory system development	biological_process	0.31609	1	3	2387	23	29181	PGSC0003DMG400010710,PGSC0003DMG402012256,PGSC0003DMG400031007
GO:1901342	regulation of vasculature development	biological_process	0.31609	1	3	2387	23	29181	PGSC0003DMG402012256,PGSC0003DMG400010710,PGSC0003DMG400031007
GO:0033227	dsRNA transport	biological_process	0.31632	1	3	2387	23	29181	PGSC0003DMG400017581,PGSC0003DMG400007012,PGSC0003DMG400019466
GO:0051032	nucleic acid transmembrane transporter activity	molecular_function	0.31632	1	3	2387	23	29181	PGSC0003DMG400019466,PGSC0003DMG400017581,PGSC0003DMG400007012
GO:0051033	RNA transmembrane transporter activity	molecular_function	0.31632	1	3	2387	23	29181	PGSC0003DMG400017581,PGSC0003DMG400007012,PGSC0003DMG400019466
GO:0016811	hydrolase activity, acting on carbon-nitrogen (but not peptide) bonds, in linear amides	molecular_function	0.31792	1	7	2387	65	29181	PGSC0003DMG400027277,PGSC0003DMG400026427,PGSC0003DMG400008149,PGSC0003DMG400000112,PGSC0003DMG400022891,Novel00393,PGSC0003DMG400019717
GO:0072509	divalent inorganic cation transmembrane transporter activity	molecular_function	0.31848	1	27	2387	277	29181	PGSC0003DMG400004233,PGSC0003DMG400003319,PGSC0003DMG401009045,PGSC0003DMG400008839,Novel01525,PGSC0003DMG400023442,PGSC0003DMG400008840,PGSC0003DMG400005638,PGSC0003DMG400010170,PGSC0003DMG402003606,Novel00273,PGSC0003DMG400003632,PGSC0003DMG400001958,PGSC0003DMG401029997,PGSC0003DMG400020249,PGSC0003DMG400005154,PGSC0003DMG400006327,PGSC0003DMG400018427,PGSC0003DMG400010619,PGSC0003DMG400026534…
GO:0016533	cyclin-dependent protein kinase 5 holoenzyme complex	cellular_component	0.31933	1	1	2387	4	29181	PGSC0003DMG400017946
GO:0016534	cyclin-dependent protein kinase 5 activator activity	molecular_function	0.31933	1	1	2387	4	29181	PGSC0003DMG400017946
GO:0019209	kinase activator activity	molecular_function	0.31933	1	1	2387	4	29181	PGSC0003DMG400017946
GO:0030295	protein kinase activator activity	molecular_function	0.31933	1	1	2387	4	29181	PGSC0003DMG400017946
GO:0043539	protein serine/threonine kinase activator activity	molecular_function	0.31933	1	1	2387	4	29181	PGSC0003DMG400017946
GO:0043176	amine binding	molecular_function	0.31958	1	1	2387	4	29181	PGSC0003DMG400004735
GO:0016836	hydro-lyase activity	molecular_function	0.31991	1	19	2387	191	29181	PGSC0003DMG400015817,PGSC0003DMG401029813,PGSC0003DMG402006147,PGSC0003DMG400003906,Novel03043,PGSC0003DMG400015546,PGSC0003DMG400004542,PGSC0003DMG400010691,PGSC0003DMG400006854,PGSC0003DMG400017572,PGSC0003DMG400029545,PGSC0003DMG400019643,PGSC0003DMG400026364,Novel03210,PGSC0003DMG400031375,PGSC0003DMG400025374,PGSC0003DMG400024772,PGSC0003DMG402003505,PGSC0003DMG400003725
GO:0048731	system development	biological_process	0.32027	1	15	2387	145	29181	PGSC0003DMG400031026,PGSC0003DMG400000394,PGSC0003DMG400018875,PGSC0003DMG400016389,PGSC0003DMG400004349,PGSC0003DMG400013949,PGSC0003DMG400030663,PGSC0003DMG402012256,PGSC0003DMG400016465,PGSC0003DMG400010710,PGSC0003DMG400029165,PGSC0003DMG400031007,PGSC0003DMG400027703,PGSC0003DMG400027964,PGSC0003DMG400019615
GO:0005096	GTPase activator activity	molecular_function	0.32043	1	13	2387	134	29181	PGSC0003DMG400016608,PGSC0003DMG400025029,PGSC0003DMG400026364,PGSC0003DMG400016203,PGSC0003DMG401011001,PGSC0003DMG400009098,PGSC0003DMG400019824,PGSC0003DMG400017515,PGSC0003DMG400028520,PGSC0003DMG402005259,PGSC0003DMG400005633,PGSC0003DMG400000615,PGSC0003DMG400025610
GO:0005834	heterotrimeric G-protein complex	cellular_component	0.32051	1	3	2387	25	29181	PGSC0003DMG400009103,PGSC0003DMG400039300,PGSC0003DMG400018939
GO:0019897	extrinsic component of plasma membrane	cellular_component	0.32051	1	3	2387	25	29181	PGSC0003DMG400039300,PGSC0003DMG400009103,PGSC0003DMG400018939
GO:0031234	extrinsic component of cytoplasmic side of plasma membrane	cellular_component	0.32051	1	3	2387	25	29181	PGSC0003DMG400018939,PGSC0003DMG400039300,PGSC0003DMG400009103
GO:0009127	purine nucleoside monophosphate biosynthetic process	biological_process	0.32261	1	27	2387	296	29181	PGSC0003DMG400013857,PGSC0003DMG402019176,Novel03007,PGSC0003DMG400022417,PGSC0003DMG400022893,PGSC0003DMG400014217,PGSC0003DMG400025519,PGSC0003DMG400005256,PGSC0003DMG400021607,PGSC0003DMG400013106,PGSC0003DMG400032558,PGSC0003DMG400005926,PGSC0003DMG400007092,PGSC0003DMG400009353,PGSC0003DMG400020484,PGSC0003DMG400026643,PGSC0003DMG400022825,PGSC0003DMG400008065,PGSC0003DMG401027166,PGSC0003DM…
GO:0009168	purine ribonucleoside monophosphate biosynthetic process	biological_process	0.32261	1	27	2387	296	29181	PGSC0003DMG400005926,PGSC0003DMG400007092,PGSC0003DMG400013106,PGSC0003DMG400032558,PGSC0003DMG400014217,PGSC0003DMG400025519,PGSC0003DMG400005256,PGSC0003DMG400021607,PGSC0003DMG400013857,PGSC0003DMG402019176,PGSC0003DMG400022417,Novel03007,PGSC0003DMG400022893,PGSC0003DMG400004995,PGSC0003DMG400023636,PGSC0003DMG400020740,PGSC0003DMG400003906,PGSC0003DMG400022770,PGSC0003DMG400028924,PGSC0003DM…
GO:0043170	macromolecule metabolic process	biological_process	0.32285	1	1025	2387	11831	29181	PGSC0003DMG400016450,PGSC0003DMG400015241,PGSC0003DMG402019176,PGSC0003DMG400018533,PGSC0003DMG400017528,Novel01290,PGSC0003DMG400023966,PGSC0003DMG400010619,PGSC0003DMG400012160,PGSC0003DMG400024971,PGSC0003DMG402000306,PGSC0003DMG400001470,PGSC0003DMG401007235,PGSC0003DMG400027036,PGSC0003DMG402014462,PGSC0003DMG400026252,PGSC0003DMG400008148,PGSC0003DMG401013540,PGSC0003DMG400012066,PGSC0003DM…
GO:0008771	[citrate (pro-3S)-lyase] ligase activity	molecular_function	0.32332	1	1	2387	4	29181	PGSC0003DMG400013949
GO:0005261	cation channel activity	molecular_function	0.32353	1	25	2387	270	29181	PGSC0003DMG400024266,PGSC0003DMG403002548,PGSC0003DMG400010170,PGSC0003DMG400030758,PGSC0003DMG400019544,PGSC0003DMG400018811,PGSC0003DMG400007001,PGSC0003DMG402007034,PGSC0003DMG400012528,PGSC0003DMG400008839,Novel01525,PGSC0003DMG400008840,PGSC0003DMG400005638,PGSC0003DMG400008367,PGSC0003DMG400026534,Novel02258,PGSC0003DMG400023799,Novel02920,PGSC0003DMG400009085,PGSC0003DMG400026428,PGSC0003D…
GO:0031341	regulation of cell killing	biological_process	0.32395	1	2	2387	14	29181	PGSC0003DMG402029795,PGSC0003DMG400022345
GO:0019865	immunoglobulin binding	molecular_function	0.32439	1	2	2387	12	29181	PGSC0003DMG400003381,PGSC0003DMG400012437
GO:0006302	double-strand break repair	biological_process	0.32548	1	9	2387	90	29181	PGSC0003DMG400010438,PGSC0003DMG400004415,PGSC0003DMG400027770,PGSC0003DMG400003581,PGSC0003DMG400024481,PGSC0003DMG400032104,PGSC0003DMG400012761,PGSC0003DMG400030963,PGSC0003DMG401020784
GO:0012502	induction of programmed cell death	biological_process	0.32661	1	1	2387	6	29181	PGSC0003DMG400022345
GO:0019051	induction by virus of host apoptotic process	biological_process	0.32661	1	1	2387	6	29181	PGSC0003DMG400022345
GO:0031343	positive regulation of cell killing	biological_process	0.32661	1	1	2387	6	29181	PGSC0003DMG400022345
GO:0043902	positive regulation of multi-organism process	biological_process	0.32661	1	1	2387	6	29181	PGSC0003DMG400022345
GO:0044533	positive regulation of apoptotic process in other organism	biological_process	0.32661	1	1	2387	6	29181	PGSC0003DMG400022345
GO:0051709	regulation of killing of cells of other organism	biological_process	0.32661	1	1	2387	6	29181	PGSC0003DMG400022345
GO:0051712	positive regulation of killing of cells of other organism	biological_process	0.32661	1	1	2387	6	29181	PGSC0003DMG400022345
GO:0052042	positive regulation by symbiont of host programmed cell death	biological_process	0.32661	1	1	2387	6	29181	PGSC0003DMG400022345
GO:0052151	positive regulation by symbiont of host apoptotic process	biological_process	0.32661	1	1	2387	6	29181	PGSC0003DMG400022345
GO:0052330	positive regulation by organism of programmed cell death in other organism involved in symbiotic interaction	biological_process	0.32661	1	1	2387	6	29181	PGSC0003DMG400022345
GO:0052501	positive regulation by organism of apoptotic process in other organism involved in symbiotic interaction	biological_process	0.32661	1	1	2387	6	29181	PGSC0003DMG400022345
GO:0060139	positive regulation of apoptotic process by virus	biological_process	0.32661	1	1	2387	6	29181	PGSC0003DMG400022345
GO:0004497	monooxygenase activity	molecular_function	0.32679	1	13	2387	127	29181	PGSC0003DMG401026514,PGSC0003DMG400027521,PGSC0003DMG400006483,PGSC0003DMG400017570,PGSC0003DMG400005673,PGSC0003DMG400000457,PGSC0003DMG400019523,PGSC0003DMG400019466,PGSC0003DMG400006854,PGSC0003DMG400021203,PGSC0003DMG400029626,PGSC0003DMG400021248,PGSC0003DMG400012437
GO:0006898	receptor-mediated endocytosis	biological_process	0.32813	1	2	2387	13	29181	PGSC0003DMG400021719,PGSC0003DMG400011330
GO:0003689	DNA clamp loader activity	molecular_function	0.32835	1	1	2387	4	29181	PGSC0003DMG400004087
GO:0005657	replication fork	cellular_component	0.32835	1	1	2387	4	29181	PGSC0003DMG400004087
GO:0005663	DNA replication factor C complex	cellular_component	0.32835	1	1	2387	4	29181	PGSC0003DMG400004087
GO:0033170	protein-DNA loading ATPase activity	molecular_function	0.32835	1	1	2387	4	29181	PGSC0003DMG400004087
GO:0019229	regulation of vasoconstriction	biological_process	0.32903	1	3	2387	22	29181	PGSC0003DMG400019142,PGSC0003DMG400014708,PGSC0003DMG402026306
GO:0042310	vasoconstriction	biological_process	0.32903	1	3	2387	22	29181	PGSC0003DMG402026306,PGSC0003DMG400014708,PGSC0003DMG400019142
GO:0007399	nervous system development	biological_process	0.32908	1	8	2387	72	29181	PGSC0003DMG400019615,PGSC0003DMG400027703,PGSC0003DMG400029165,PGSC0003DMG400016465,PGSC0003DMG400030663,PGSC0003DMG400013949,PGSC0003DMG400016389,PGSC0003DMG400000394
GO:0016671	oxidoreductase activity, acting on a sulfur group of donors, disulfide as acceptor	molecular_function	0.3294	1	3	2387	27	29181	PGSC0003DMG400010414,PGSC0003DMG400003634,PGSC0003DMG400026788
GO:0004826	phenylalanine-tRNA ligase activity	molecular_function	0.32984	1	4	2387	32	29181	PGSC0003DMG400014694,Novel02246,PGSC0003DMG400011521,PGSC0003DMG400023334
GO:0042030	ATPase inhibitor activity	molecular_function	0.32984	1	6	2387	55	29181	PGSC0003DMG400014722,PGSC0003DMG400020827,PGSC0003DMG400008873,PGSC0003DMG400000292,PGSC0003DMG402008019,PGSC0003DMG402006496
GO:0007166	cell surface receptor signaling pathway	biological_process	0.33085	1	24	2387	248	29181	PGSC0003DMG400001123,PGSC0003DMG400015253,PGSC0003DMG400020170,PGSC0003DMG400023467,PGSC0003DMG400031412,PGSC0003DMG402002053,PGSC0003DMG400031026,PGSC0003DMG400009867,PGSC0003DMG400031821,PGSC0003DMG400018811,PGSC0003DMG400022299,PGSC0003DMG400027061,PGSC0003DMG400019881,PGSC0003DMG400016769,PGSC0003DMG402023851,PGSC0003DMG400021253,PGSC0003DMG400030910,PGSC0003DMG400027916,PGSC0003DMG400032118,…
GO:0006772	thiamine metabolic process	biological_process	0.33183	1	2	2387	14	29181	PGSC0003DMG400006483,PGSC0003DMG401023772
GO:0009228	thiamine biosynthetic process	biological_process	0.33183	1	2	2387	14	29181	PGSC0003DMG401023772,PGSC0003DMG400006483
GO:0042723	thiamine-containing compound metabolic process	biological_process	0.33183	1	2	2387	14	29181	PGSC0003DMG400006483,PGSC0003DMG401023772
GO:0042724	thiamine-containing compound biosynthetic process	biological_process	0.33183	1	2	2387	14	29181	PGSC0003DMG401023772,PGSC0003DMG400006483
GO:0005388	calcium-transporting ATPase activity	molecular_function	0.33191	1	1	2387	4	29181	PGSC0003DMG402003606
GO:0045321	leukocyte activation	biological_process	0.3326	1	4	2387	30	29181	PGSC0003DMG400018283,PGSC0003DMG400019635,PGSC0003DMG400025700,PGSC0003DMG400003319
GO:0051705	multi-organism behavior	biological_process	0.33276	1	4	2387	37	29181	PGSC0003DMG401026447,PGSC0003DMG400025610,PGSC0003DMG400031130,PGSC0003DMG400032166
GO:0004557	alpha-galactosidase activity	molecular_function	0.33318	1	1	2387	4	29181	PGSC0003DMG400003465
GO:0010466	negative regulation of peptidase activity	biological_process	0.33351	1	3	2387	23	29181	PGSC0003DMG400019574,PGSC0003DMG400018107,PGSC0003DMG400010438
GO:0010951	negative regulation of endopeptidase activity	biological_process	0.33351	1	3	2387	23	29181	PGSC0003DMG400018107,PGSC0003DMG400019574,PGSC0003DMG400010438
GO:0030288	outer membrane-bounded periplasmic space	cellular_component	0.33396	1	5	2387	60	29181	PGSC0003DMG400003073,PGSC0003DMG400004542,PGSC0003DMG400024229,PGSC0003DMG400024102,PGSC0003DMG400010527
GO:0031123	RNA 3'-end processing	biological_process	0.33411	1	5	2387	47	29181	PGSC0003DMG400008328,PGSC0003DMG400025887,Novel01048,PGSC0003DMG400031216,PGSC0003DMG400002200
GO:0004555	alpha,alpha-trehalase activity	molecular_function	0.33478	1	2	2387	13	29181	Novel02532,PGSC0003DMG400022352
GO:0015927	trehalase activity	molecular_function	0.33478	1	2	2387	13	29181	Novel02532,PGSC0003DMG400022352
GO:0000149	SNARE binding	molecular_function	0.3355	1	2	2387	16	29181	PGSC0003DMG400012711,PGSC0003DMG400019179
GO:0019905	syntaxin binding	molecular_function	0.3355	1	2	2387	16	29181	PGSC0003DMG400019179,PGSC0003DMG400012711
GO:0009847	spore germination	biological_process	0.33561	1	5	2387	43	29181	PGSC0003DMG400032839,PGSC0003DMG400023436,Novel00688,PGSC0003DMG400022255,PGSC0003DMG400006735
GO:0008202	steroid metabolic process	biological_process	0.33621	1	16	2387	158	29181	PGSC0003DMG400005197,PGSC0003DMG400007379,PGSC0003DMG400003564,Novel00300,PGSC0003DMG400025373,PGSC0003DMG402011377,PGSC0003DMG400003411,Novel00444,PGSC0003DMG400022093,PGSC0003DMG400007016,PGSC0003DMG400006097,PGSC0003DMG400021254,Novel00443,PGSC0003DMG400011222,PGSC0003DMG400019825,PGSC0003DMG400016850
GO:0005381	iron ion transmembrane transporter activity	molecular_function	0.33661	1	13	2387	119	29181	PGSC0003DMG400025262,PGSC0003DMG400005744,PGSC0003DMG400005178,Novel00273,PGSC0003DMG400030425,PGSC0003DMG400000457,PGSC0003DMG400013632,Novel00993,PGSC0003DMG400003319,PGSC0003DMG400020249,PGSC0003DMG400018427,PGSC0003DMG400010619,PGSC0003DMG400023442
GO:0006164	purine nucleotide biosynthetic process	biological_process	0.33669	1	33	2387	365	29181	PGSC0003DMG400013106,PGSC0003DMG400007092,PGSC0003DMG400005926,PGSC0003DMG401000923,PGSC0003DMG400022893,PGSC0003DMG400013857,PGSC0003DMG402019176,PGSC0003DMG400021607,PGSC0003DMG400014217,PGSC0003DMG400025519,PGSC0003DMG400005256,PGSC0003DMG400017655,PGSC0003DMG400028924,PGSC0003DMG400017116,PGSC0003DMG400031029,PGSC0003DMG400020484,PGSC0003DMG400026643,PGSC0003DMG400009353,PGSC0003DMG400007760,…
GO:0032922	circadian regulation of gene expression	biological_process	0.33728	1	1	2387	5	29181	PGSC0003DMG400019455
GO:0003989	acetyl-CoA carboxylase activity	molecular_function	0.33828	1	3	2387	26	29181	PGSC0003DMG400022027,PGSC0003DMG400026534,PGSC0003DMG402025863
GO:0016421	CoA carboxylase activity	molecular_function	0.33828	1	3	2387	26	29181	PGSC0003DMG400026534,PGSC0003DMG400022027,PGSC0003DMG402025863
GO:0016885	ligase activity, forming carbon-carbon bonds	molecular_function	0.33828	1	3	2387	26	29181	PGSC0003DMG400026534,PGSC0003DMG400022027,PGSC0003DMG402025863
GO:0051184	cofactor transporter activity	molecular_function	0.33902	1	5	2387	47	29181	PGSC0003DMG400003777,PGSC0003DMG400003807,PGSC0003DMG400019253,PGSC0003DMG400023478,PGSC0003DMG400017751
GO:0001514	selenocysteine incorporation	biological_process	0.3399	1	4	2387	31	29181	PGSC0003DMG400022893,Novel00814,PGSC0003DMG402028565,PGSC0003DMG400003564
GO:0006451	translational readthrough	biological_process	0.3399	1	4	2387	31	29181	Novel00814,PGSC0003DMG400022893,PGSC0003DMG400003564,PGSC0003DMG402028565
GO:0043436	oxoacid metabolic process	biological_process	0.34089	1	128	2387	1376	29181	PGSC0003DMG402007138,PGSC0003DMG400023319,PGSC0003DMG400000588,PGSC0003DMG400010007,PGSC0003DMG400027514,PGSC0003DMG400003078,PGSC0003DMG400002781,PGSC0003DMG400006829,Novel03074,PGSC0003DMG400014694,PGSC0003DMG400022027,PGSC0003DMG400027925,PGSC0003DMG402006147,PGSC0003DMG400018939,PGSC0003DMG400023881,PGSC0003DMG400007349,PGSC0003DMG400003882,PGSC0003DMG400019734,PGSC0003DMG400032792,PGSC0003DM…
GO:0005747	mitochondrial respiratory chain complex I	cellular_component	0.34139	1	6	2387	54	29181	PGSC0003DMG400011089,PGSC0003DMG400018080,PGSC0003DMG402015928,PGSC0003DMG400010007,PGSC0003DMG400006975,PGSC0003DMG400027522
GO:0030964	NADH dehydrogenase complex	cellular_component	0.34139	1	6	2387	54	29181	PGSC0003DMG402015928,PGSC0003DMG400010007,PGSC0003DMG400006975,PGSC0003DMG400027522,PGSC0003DMG400018080,PGSC0003DMG400011089
GO:0045271	respiratory chain complex I	cellular_component	0.34139	1	6	2387	54	29181	PGSC0003DMG400027522,PGSC0003DMG402015928,PGSC0003DMG400006975,PGSC0003DMG400010007,PGSC0003DMG400018080,PGSC0003DMG400011089
GO:0000281	mitotic cytokinesis	biological_process	0.34203	1	17	2387	195	29181	PGSC0003DMG401020784,PGSC0003DMG401024930,PGSC0003DMG400019954,PGSC0003DMG400001378,PGSC0003DMG400028333,PGSC0003DMG400004995,Novel03379,PGSC0003DMG400019455,PGSC0003DMG400033569,PGSC0003DMG400007092,PGSC0003DMG402024252,PGSC0003DMG400017440,PGSC0003DMG400012711,PGSC0003DMG400001417,PGSC0003DMG400013809,PGSC0003DMG400016203,PGSC0003DMG400022061
GO:0000917	barrier septum assembly	biological_process	0.34203	1	17	2387	195	29181	PGSC0003DMG400001378,PGSC0003DMG400028333,PGSC0003DMG400004995,PGSC0003DMG401020784,PGSC0003DMG401024930,PGSC0003DMG400019954,PGSC0003DMG400019455,Novel03379,PGSC0003DMG402024252,PGSC0003DMG400007092,PGSC0003DMG400017440,PGSC0003DMG400033569,PGSC0003DMG400001417,PGSC0003DMG400013809,PGSC0003DMG400016203,PGSC0003DMG400022061,PGSC0003DMG400012711
GO:0032506	cytokinetic process	biological_process	0.34203	1	17	2387	195	29181	PGSC0003DMG400033569,PGSC0003DMG400017440,PGSC0003DMG400007092,PGSC0003DMG402024252,PGSC0003DMG400012711,PGSC0003DMG400013809,PGSC0003DMG400016203,PGSC0003DMG400022061,PGSC0003DMG400001417,PGSC0003DMG401024930,PGSC0003DMG400019954,PGSC0003DMG401020784,PGSC0003DMG400004995,PGSC0003DMG400001378,PGSC0003DMG400028333,Novel03379,PGSC0003DMG400019455
GO:0061640	cytoskeleton-dependent cytokinesis	biological_process	0.34203	1	17	2387	195	29181	PGSC0003DMG400012711,PGSC0003DMG400013809,PGSC0003DMG400016203,PGSC0003DMG400022061,PGSC0003DMG400001417,PGSC0003DMG400033569,PGSC0003DMG400017440,PGSC0003DMG402024252,PGSC0003DMG400007092,Novel03379,PGSC0003DMG400019455,PGSC0003DMG401024930,PGSC0003DMG400019954,PGSC0003DMG401020784,PGSC0003DMG400004995,PGSC0003DMG400001378,PGSC0003DMG400028333
GO:0090529	cell septum assembly	biological_process	0.34203	1	17	2387	195	29181	PGSC0003DMG400028333,PGSC0003DMG400001378,PGSC0003DMG400004995,PGSC0003DMG401020784,PGSC0003DMG400019954,PGSC0003DMG401024930,PGSC0003DMG400019455,Novel03379,PGSC0003DMG402024252,PGSC0003DMG400007092,PGSC0003DMG400017440,PGSC0003DMG400033569,PGSC0003DMG400001417,PGSC0003DMG400022061,PGSC0003DMG400013809,PGSC0003DMG400016203,PGSC0003DMG400012711
GO:1902410	mitotic cytokinetic process	biological_process	0.34203	1	17	2387	195	29181	PGSC0003DMG400033569,PGSC0003DMG402024252,PGSC0003DMG400007092,PGSC0003DMG400017440,PGSC0003DMG400012711,PGSC0003DMG400001417,PGSC0003DMG400022061,PGSC0003DMG400016203,PGSC0003DMG400013809,PGSC0003DMG401020784,PGSC0003DMG400019954,PGSC0003DMG401024930,PGSC0003DMG400028333,PGSC0003DMG400001378,PGSC0003DMG400004995,Novel03379,PGSC0003DMG400019455
GO:0015774	polysaccharide transport	biological_process	0.34243	1	2	2387	17	29181	PGSC0003DMG400017610,PGSC0003DMG400009730
GO:0033037	polysaccharide localization	biological_process	0.34243	1	2	2387	17	29181	PGSC0003DMG400009730,PGSC0003DMG400017610
GO:0004664	prephenate dehydratase activity	molecular_function	0.34293	1	2	2387	14	29181	PGSC0003DMG400026364,PGSC0003DMG400025374
GO:0009094	L-phenylalanine biosynthetic process	biological_process	0.34293	1	2	2387	14	29181	PGSC0003DMG400026364,PGSC0003DMG400025374
GO:1902223	erythrose 4-phosphate/phosphoenolpyruvate family amino acid biosynthetic process	biological_process	0.34293	1	2	2387	14	29181	PGSC0003DMG400025374,PGSC0003DMG400026364
GO:0019829	cation-transporting ATPase activity	molecular_function	0.34438	1	8	2387	87	29181	PGSC0003DMG400007092,PGSC0003DMG400003906,PGSC0003DMG402003606,PGSC0003DMG400020740,PGSC0003DMG400025610,PGSC0003DMG400026643,PGSC0003DMG400005256,PGSC0003DMG401023104
GO:0042625	ATPase activity, coupled to transmembrane movement of ions	molecular_function	0.34438	1	8	2387	87	29181	PGSC0003DMG400020740,PGSC0003DMG400007092,PGSC0003DMG400003906,PGSC0003DMG402003606,PGSC0003DMG400025610,PGSC0003DMG400026643,PGSC0003DMG401023104,PGSC0003DMG400005256
GO:0009060	aerobic respiration	biological_process	0.34439	1	6	2387	53	29181	PGSC0003DMG400042507,PGSC0003DMG402007138,PGSC0003DMG400030843,PGSC0003DMG402021921,PGSC0003DMG400020422,PGSC0003DMG400003078
GO:1901576	organic substance biosynthetic process	biological_process	0.34535	1	713	2387	8310	29181	PGSC0003DMG400002287,PGSC0003DMG400002757,PGSC0003DMG400031375,Novel00317,PGSC0003DMG400014444,PGSC0003DMG401003154,PGSC0003DMG400002359,PGSC0003DMG402011372,PGSC0003DMG400015533,PGSC0003DMG400015766,PGSC0003DMG400009103,PGSC0003DMG400024267,PGSC0003DMG400013401,PGSC0003DMG400004168,PGSC0003DMG400030246,PGSC0003DMG400016679,PGSC0003DMG400022232,PGSC0003DMG400001520,PGSC0003DMG400012196,PGSC0003DM…
GO:0005537	mannose binding	molecular_function	0.34652	1	1	2387	4	29181	PGSC0003DMG400023799
GO:0005234	extracellular-glutamate-gated ion channel activity	molecular_function	0.34667	1	3	2387	21	29181	PGSC0003DMG401024472,PGSC0003DMG400009914,PGSC0003DMG400026518
GO:0035639	purine ribonucleoside triphosphate binding	molecular_function	0.34735	1	396	2387	4182	29181	PGSC0003DMG400025030,PGSC0003DMG400004704,PGSC0003DMG402028565,PGSC0003DMG400003069,PGSC0003DMG401000923,PGSC0003DMG400002799,Novel00814,PGSC0003DMG400005839,PGSC0003DMG400013489,PGSC0003DMG400024365,PGSC0003DMG400009085,PGSC0003DMG400015128,PGSC0003DMG400034307,Novel01787,PGSC0003DMG400014047,Novel02174,PGSC0003DMG400005744,PGSC0003DMG400028548,PGSC0003DMG400004579,PGSC0003DMG400018427,PGSC0003D…
GO:0006351	transcription, DNA-templated	biological_process	0.34765	1	372	2387	4313	29181	PGSC0003DMG400021546,PGSC0003DMG400025797,PGSC0003DMG400001343,PGSC0003DMG400019615,PGSC0003DMG400033035,PGSC0003DMG400041451,PGSC0003DMG400036536,Novel00360,PGSC0003DMG400009905,PGSC0003DMG400029827,PGSC0003DMG400015608,PGSC0003DMG400021287,PGSC0003DMG400008734,PGSC0003DMG400026534,PGSC0003DMG400013949,PGSC0003DMG400030637,PGSC0003DMG400021422,PGSC0003DMG401006188,PGSC0003DMG400005040,PGSC0003DM…
GO:0097659	nucleic acid-templated transcription	biological_process	0.34765	1	372	2387	4313	29181	PGSC0003DMG401002548,PGSC0003DMG400023341,PGSC0003DMG402021159,PGSC0003DMG400005991,PGSC0003DMG400002627,PGSC0003DMG402032501,PGSC0003DMG402009663,PGSC0003DMG400006026,PGSC0003DMG400011089,PGSC0003DMG400023467,PGSC0003DMG400017510,PGSC0003DMG402019457,PGSC0003DMG400013280,PGSC0003DMG400007678,PGSC0003DMG400019693,PGSC0003DMG400004289,PGSC0003DMG402002635,PGSC0003DMG400022027,PGSC0003DMG400016892,…
GO:0006537	glutamate biosynthetic process	biological_process	0.34849	1	2	2387	12	29181	PGSC0003DMG400021248,PGSC0003DMG400002593
GO:0043650	dicarboxylic acid biosynthetic process	biological_process	0.34849	1	2	2387	12	29181	PGSC0003DMG400021248,PGSC0003DMG400002593
GO:0032784	regulation of DNA-templated transcription, elongation	biological_process	0.34941	1	6	2387	55	29181	PGSC0003DMG400011216,PGSC0003DMG400021287,PGSC0003DMG402021193,PGSC0003DMG400029879,PGSC0003DMG400011179,PGSC0003DMG400016714
GO:0046873	metal ion transmembrane transporter activity	molecular_function	0.35009	1	66	2387	733	29181	PGSC0003DMG402007034,PGSC0003DMG400030519,PGSC0003DMG400005638,PGSC0003DMG400005301,Novel01525,Novel00273,PGSC0003DMG400003632,PGSC0003DMG400005154,PGSC0003DMG400006327,PGSC0003DMG401029997,PGSC0003DMG400018427,PGSC0003DMG400022604,PGSC0003DMG400024953,PGSC0003DMG400005744,PGSC0003DMG400032104,Novel02683,PGSC0003DMG400009085,PGSC0003DMG402011364,PGSC0003DMG400028316,PGSC0003DMG400023442,PGSC0003D…
GO:0005024	transforming growth factor beta-activated receptor activity	molecular_function	0.35071	1	1	2387	4	29181	PGSC0003DMG400029165
GO:0005026	transforming growth factor beta receptor activity, type II	molecular_function	0.35071	1	1	2387	4	29181	PGSC0003DMG400029165
GO:0050750	low-density lipoprotein particle receptor binding	molecular_function	0.35092	1	1	2387	5	29181	PGSC0003DMG400030837
GO:0070325	lipoprotein particle receptor binding	molecular_function	0.35092	1	1	2387	5	29181	PGSC0003DMG400030837
GO:0009152	purine ribonucleotide biosynthetic process	biological_process	0.35129	1	32	2387	357	29181	PGSC0003DMG400020740,PGSC0003DMG400023636,PGSC0003DMG400022770,PGSC0003DMG400003906,PGSC0003DMG400004995,PGSC0003DMG400022825,PGSC0003DMG400018516,PGSC0003DMG400032558,PGSC0003DMG402020303,Novel03007,PGSC0003DMG400022417,PGSC0003DMG400031029,PGSC0003DMG400017655,PGSC0003DMG400028924,PGSC0003DMG400007760,PGSC0003DMG402026306,PGSC0003DMG401027166,PGSC0003DMG400008065,PGSC0003DMG400020484,PGSC0003DM…
GO:0015995	chlorophyll biosynthetic process	biological_process	0.35184	1	5	2387	43	29181	PGSC0003DMG400014782,PGSC0003DMG400017572,PGSC0003DMG402020115,PGSC0003DMG400018437,PGSC0003DMG402028252
GO:0006805	xenobiotic metabolic process	biological_process	0.35228	1	1	2387	4	29181	PGSC0003DMG400023881
GO:0009410	response to xenobiotic stimulus	biological_process	0.35228	1	1	2387	4	29181	PGSC0003DMG400023881
GO:0010124	phenylacetate catabolic process	biological_process	0.35228	1	1	2387	4	29181	PGSC0003DMG400023881
GO:0042178	xenobiotic catabolic process	biological_process	0.35228	1	1	2387	4	29181	PGSC0003DMG400023881
GO:0071466	cellular response to xenobiotic stimulus	biological_process	0.35228	1	1	2387	4	29181	PGSC0003DMG400023881
GO:0034755	iron ion transmembrane transport	biological_process	0.35233	1	2	2387	14	29181	PGSC0003DMG400013632,PGSC0003DMG400000457
GO:0004345	glucose-6-phosphate dehydrogenase activity	molecular_function	0.35259	1	2	2387	15	29181	PGSC0003DMG400017394,PGSC0003DMG401025427
GO:0004584	dolichyl-phosphate-mannose-glycolipid alpha-mannosyltransferase activity	molecular_function	0.35263	1	1	2387	5	29181	PGSC0003DMG400011801
GO:0003997	acyl-CoA oxidase activity	molecular_function	0.35335	1	2	2387	13	29181	PGSC0003DMG400027002,PGSC0003DMG400020620
GO:0015721	bile acid and bile salt transport	biological_process	0.35358	1	1	2387	6	29181	PGSC0003DMG402019176
GO:0046982	protein heterodimerization activity	molecular_function	0.35358	1	1	2387	6	29181	PGSC0003DMG402019176
GO:0004930	G-protein coupled receptor activity	molecular_function	0.35391	1	14	2387	139	29181	PGSC0003DMG400006086,PGSC0003DMG400026403,PGSC0003DMG400027048,Novel02622,PGSC0003DMG400002564,PGSC0003DMG400001520,PGSC0003DMG400027131,PGSC0003DMG400017835,PGSC0003DMG400032154,PGSC0003DMG400011479,PGSC0003DMG402010657,PGSC0003DMG402006561,PGSC0003DMG400024481,PGSC0003DMG402029631
GO:0009156	ribonucleoside monophosphate biosynthetic process	biological_process	0.35432	1	28	2387	311	29181	PGSC0003DMG400032558,PGSC0003DMG400013106,PGSC0003DMG400005926,PGSC0003DMG400007092,PGSC0003DMG402019176,PGSC0003DMG400013857,PGSC0003DMG400022893,PGSC0003DMG400022417,Novel03007,PGSC0003DMG400005256,PGSC0003DMG400025519,PGSC0003DMG400014217,PGSC0003DMG400021607,PGSC0003DMG400001896,PGSC0003DMG400028924,PGSC0003DMG400017655,PGSC0003DMG400004995,PGSC0003DMG400022770,PGSC0003DMG400003906,PGSC0003DM…
GO:0005674	transcription factor TFIIF complex	cellular_component	0.35488	1	1	2387	5	29181	PGSC0003DMG400001391
GO:0005911	cell-cell junction	cellular_component	0.35504	1	2	2387	15	29181	PGSC0003DMG400027328,PGSC0003DMG400026211
GO:0044262	cellular carbohydrate metabolic process	biological_process	0.3553	1	34	2387	358	29181	PGSC0003DMG400000932,PGSC0003DMG400010556,PGSC0003DMG400015194,PGSC0003DMG400010334,PGSC0003DMG400020619,PGSC0003DMG400000408,PGSC0003DMG400009279,PGSC0003DMG400027916,Novel02306,PGSC0003DMG400028981,PGSC0003DMG400009941,PGSC0003DMG400010413,PGSC0003DMG402010181,PGSC0003DMG400010897,PGSC0003DMG401000287,PGSC0003DMG400004109,PGSC0003DMG400006509,PGSC0003DMG400026428,PGSC0003DMG400029792,PGSC0003DM…
GO:0006026	aminoglycan catabolic process	biological_process	0.35535	1	4	2387	36	29181	PGSC0003DMG402024871,PGSC0003DMG400031217,Novel01597,PGSC0003DMG400027415
GO:0009277	fungal-type cell wall	cellular_component	0.3557	1	1	2387	4	29181	PGSC0003DMG400019403
GO:0019637	organophosphate metabolic process	biological_process	0.35616	1	113	2387	1255	29181	PGSC0003DMG400032118,PGSC0003DMG400010007,PGSC0003DMG400027916,PGSC0003DMG400022417,PGSC0003DMG402020303,PGSC0003DMG400029879,PGSC0003DMG400000204,PGSC0003DMG400020497,PGSC0003DMG400007496,PGSC0003DMG400033932,PGSC0003DMG400030870,PGSC0003DMG400015392,PGSC0003DMG402014462,PGSC0003DMG401029267,PGSC0003DMG400017743,PGSC0003DMG400010337,PGSC0003DMG400010352,PGSC0003DMG400022825,PGSC0003DMG400027925,…
GO:0031047	gene silencing by RNA	biological_process	0.35725	1	4	2387	32	29181	PGSC0003DMG400030985,PGSC0003DMG400024388,PGSC0003DMG400030322,PGSC0003DMG402000479
GO:0004525	ribonuclease III activity	molecular_function	0.35758	1	3	2387	25	29181	PGSC0003DMG400030510,PGSC0003DMG400004723,PGSC0003DMG400024487
GO:0032296	double-stranded RNA-specific ribonuclease activity	molecular_function	0.35758	1	3	2387	25	29181	PGSC0003DMG400030510,PGSC0003DMG400004723,PGSC0003DMG400024487
GO:0019888	protein phosphatase regulator activity	molecular_function	0.35887	1	4	2387	33	29181	Novel03408,PGSC0003DMG401027561,PGSC0003DMG400017455,PGSC0003DMG400000695
GO:0016763	transferase activity, transferring pentosyl groups	molecular_function	0.35945	1	15	2387	148	29181	PGSC0003DMG400007496,PGSC0003DMG400024926,PGSC0003DMG400022209,PGSC0003DMG400030838,PGSC0003DMG400022885,PGSC0003DMG400008087,Novel01744,PGSC0003DMG400018421,PGSC0003DMG400019124,PGSC0003DMG400027131,PGSC0003DMG400020344,PGSC0003DMG400005675,PGSC0003DMG400030092,PGSC0003DMG400024600,PGSC0003DMG401019352
GO:0019074	viral RNA genome packaging	biological_process	0.3595	1	1	2387	4	29181	PGSC0003DMG400010897
GO:0005681	spliceosomal complex	cellular_component	0.35992	1	9	2387	93	29181	PGSC0003DMG400021644,PGSC0003DMG400020157,PGSC0003DMG400025515,PGSC0003DMG400013242,PGSC0003DMG400001329,PGSC0003DMG400012711,PGSC0003DMG400016270,PGSC0003DMG400006129,PGSC0003DMG400004869
GO:0007617	mating behavior	biological_process	0.35992	1	3	2387	26	29181	PGSC0003DMG400032166,PGSC0003DMG400031130,PGSC0003DMG400025610
GO:0019098	reproductive behavior	biological_process	0.35992	1	3	2387	26	29181	PGSC0003DMG400031130,PGSC0003DMG400025610,PGSC0003DMG400032166
GO:0044705	multi-organism reproductive behavior	biological_process	0.35992	1	3	2387	26	29181	PGSC0003DMG400032166,PGSC0003DMG400025610,PGSC0003DMG400031130
GO:0035091	phosphatidylinositol binding	molecular_function	0.36024	1	4	2387	33	29181	Novel00360,PGSC0003DMG402032565,PGSC0003DMG400023012,PGSC0003DMG401002542
GO:0010393	galacturonan metabolic process	biological_process	0.36025	1	1	2387	4	29181	PGSC0003DMG400006048
GO:0045488	pectin metabolic process	biological_process	0.36025	1	1	2387	4	29181	PGSC0003DMG400006048
GO:0045490	pectin catabolic process	biological_process	0.36025	1	1	2387	4	29181	PGSC0003DMG400006048
GO:0047487	oligogalacturonide lyase activity	molecular_function	0.36025	1	1	2387	4	29181	PGSC0003DMG400006048
GO:0051094	positive regulation of developmental process	biological_process	0.36047	1	3	2387	27	29181	PGSC0003DMG400021255,PGSC0003DMG402024549,PGSC0003DMG400031007
GO:0043207	response to external biotic stimulus	biological_process	0.36085	1	36	2387	398	29181	PGSC0003DMG400021421,PGSC0003DMG400001099,PGSC0003DMG400024926,PGSC0003DMG400004723,PGSC0003DMG400015075,PGSC0003DMG400003647,PGSC0003DMG400013022,PGSC0003DMG400004735,PGSC0003DMG400008545,PGSC0003DMG402021193,PGSC0003DMG400001858,PGSC0003DMG400013857,PGSC0003DMG400030115,PGSC0003DMG400018875,PGSC0003DMG400019321,PGSC0003DMG400023799,PGSC0003DMG400002452,PGSC0003DMG400022860,PGSC0003DMG400006975,…
GO:0051707	response to other organism	biological_process	0.36085	1	36	2387	398	29181	PGSC0003DMG400021421,PGSC0003DMG400001099,PGSC0003DMG400024926,PGSC0003DMG400004723,PGSC0003DMG400015075,PGSC0003DMG400003647,PGSC0003DMG400013022,PGSC0003DMG400004735,PGSC0003DMG400008545,PGSC0003DMG402021193,PGSC0003DMG400001858,PGSC0003DMG400013857,PGSC0003DMG400030115,PGSC0003DMG400018875,PGSC0003DMG400019321,PGSC0003DMG400023799,PGSC0003DMG400002452,PGSC0003DMG400022860,PGSC0003DMG400006975,…
GO:0004618	phosphoglycerate kinase activity	molecular_function	0.36178	1	1	2387	5	29181	PGSC0003DMG400003882
GO:0004417	hydroxyethylthiazole kinase activity	molecular_function	0.36295	1	1	2387	5	29181	PGSC0003DMG401023772
GO:0003911	DNA ligase (NAD+) activity	molecular_function	0.36349	1	2	2387	14	29181	PGSC0003DMG400008108,PGSC0003DMG400023513
GO:0008556	potassium-transporting ATPase activity	molecular_function	0.36379	1	2	2387	16	29181	PGSC0003DMG401023104,PGSC0003DMG400025610
GO:0050897	cobalt ion binding	molecular_function	0.36534	1	2	2387	16	29181	PGSC0003DMG400003138,PGSC0003DMG400010361
GO:0000902	cell morphogenesis	biological_process	0.36578	1	15	2387	142	29181	PGSC0003DMG400025974,PGSC0003DMG400016389,PGSC0003DMG400000394,Novel02312,PGSC0003DMG400000398,PGSC0003DMG400016811,PGSC0003DMG400016465,PGSC0003DMG400024887,PGSC0003DMG400019615,PGSC0003DMG400010677,PGSC0003DMG400029165,PGSC0003DMG400027703,PGSC0003DMG400013949,PGSC0003DMG400030663,PGSC0003DMG400002992
GO:0032989	cellular component morphogenesis	biological_process	0.36578	1	15	2387	142	29181	PGSC0003DMG400013949,PGSC0003DMG400030663,PGSC0003DMG400002992,PGSC0003DMG400024887,PGSC0003DMG400016465,PGSC0003DMG400010677,PGSC0003DMG400019615,PGSC0003DMG400029165,PGSC0003DMG400027703,PGSC0003DMG400016811,PGSC0003DMG400016389,PGSC0003DMG400025974,Novel02312,PGSC0003DMG400000394,PGSC0003DMG400000398
GO:0016773	phosphotransferase activity, alcohol group as acceptor	molecular_function	0.36579	1	218	2387	2266	29181	PGSC0003DMG400005688,Novel02904,PGSC0003DMG400026156,PGSC0003DMG400027048,PGSC0003DMG400027204,PGSC0003DMG400015492,PGSC0003DMG400004415,PGSC0003DMG400017728,PGSC0003DMG400009843,Novel01235,PGSC0003DMG400007963,PGSC0003DMG400021804,PGSC0003DMG400000331,PGSC0003DMG402029267,PGSC0003DMG400024220,PGSC0003DMG400017946,PGSC0003DMG400027744,PGSC0003DMG401030531,PGSC0003DMG400023004,PGSC0003DMG401002542…
GO:0019752	carboxylic acid metabolic process	biological_process	0.36609	1	125	2387	1353	29181	PGSC0003DMG400027514,PGSC0003DMG400021311,PGSC0003DMG400003078,PGSC0003DMG401002654,PGSC0003DMG400012193,PGSC0003DMG402007138,PGSC0003DMG400023319,PGSC0003DMG400001398,PGSC0003DMG400010007,PGSC0003DMG400005675,PGSC0003DMG400024915,PGSC0003DMG400015392,PGSC0003DMG400006829,Novel03074,PGSC0003DMG400002781,PGSC0003DMG400010338,PGSC0003DMG400027192,PGSC0003DMG400006822,PGSC0003DMG400022027,PGSC0003DM…
GO:0006298	mismatch repair	biological_process	0.36667	1	8	2387	78	29181	PGSC0003DMG400031833,PGSC0003DMG400004071,Novel00805,PGSC0003DMG402008032,PGSC0003DMG400024481,PGSC0003DMG400028639,Novel01966,PGSC0003DMG400019897
GO:0007160	cell-matrix adhesion	biological_process	0.36759	1	1	2387	5	29181	PGSC0003DMG400014213
GO:0050290	sphingomyelin phosphodiesterase D activity	molecular_function	0.36804	1	1	2387	5	29181	Novel03243
GO:0017137	Rab GTPase binding	molecular_function	0.36852	1	1	2387	5	29181	PGSC0003DMG400018107
GO:0044161	host cell cytoplasmic vesicle	cellular_component	0.36852	1	1	2387	5	29181	PGSC0003DMG400018107
GO:0071804	cellular potassium ion transport	biological_process	0.36868	1	5	2387	44	29181	PGSC0003DMG400010431,PGSC0003DMG400028229,PGSC0003DMG401002542,Novel02242,PGSC0003DMG401019957
GO:0071805	potassium ion transmembrane transport	biological_process	0.36868	1	5	2387	44	29181	PGSC0003DMG401019957,Novel02242,PGSC0003DMG400010431,PGSC0003DMG401002542,PGSC0003DMG400028229
GO:0045261	proton-transporting ATP synthase complex, catalytic core F(1)	cellular_component	0.36873	1	6	2387	64	29181	PGSC0003DMG400003906,PGSC0003DMG400020740,PGSC0003DMG400005256,PGSC0003DMG400014217,PGSC0003DMG400025519,PGSC0003DMG400026643
GO:0007217	tachykinin receptor signaling pathway	biological_process	0.36878	1	4	2387	33	29181	PGSC0003DMG400022417,PGSC0003DMG400017510,PGSC0003DMG400006550,PGSC0003DMG400011479
GO:0042302	structural constituent of cuticle	molecular_function	0.36905	1	6	2387	58	29181	PGSC0003DMG400010913,Novel00393,PGSC0003DMG400006295,PGSC0003DMG400026156,PGSC0003DMG400009423,PGSC0003DMG400017762
GO:0006777	Mo-molybdopterin cofactor biosynthetic process	biological_process	0.36923	1	9	2387	80	29181	PGSC0003DMG400007496,PGSC0003DMG400024571,PGSC0003DMG400031248,PGSC0003DMG400009303,PGSC0003DMG400008871,PGSC0003DMG400004579,PGSC0003DMG400026493,PGSC0003DMG400021343,PGSC0003DMG400030507
GO:0019720	Mo-molybdopterin cofactor metabolic process	biological_process	0.36923	1	9	2387	80	29181	PGSC0003DMG400031248,PGSC0003DMG400007496,PGSC0003DMG400024571,PGSC0003DMG400021343,PGSC0003DMG400026493,PGSC0003DMG400030507,PGSC0003DMG400008871,PGSC0003DMG400004579,PGSC0003DMG400009303
GO:0006570	tyrosine metabolic process	biological_process	0.36932	1	2	2387	14	29181	PGSC0003DMG400015330,PGSC0003DMG402000914
GO:0008987	quinolinate synthetase A activity	molecular_function	0.36936	1	1	2387	4	29181	PGSC0003DMG400018194
GO:0004026	alcohol O-acetyltransferase activity	molecular_function	0.36954	1	2	2387	13	29181	PGSC0003DMG400015650,PGSC0003DMG400003747
GO:0034318	alcohol O-acyltransferase activity	molecular_function	0.36954	1	2	2387	13	29181	PGSC0003DMG400015650,PGSC0003DMG400003747
GO:0009898	cytoplasmic side of plasma membrane	cellular_component	0.3697	1	3	2387	27	29181	PGSC0003DMG400018939,PGSC0003DMG400039300,PGSC0003DMG400009103
GO:0098552	side of membrane	cellular_component	0.3697	1	3	2387	27	29181	PGSC0003DMG400039300,PGSC0003DMG400009103,PGSC0003DMG400018939
GO:0098562	cytoplasmic side of membrane	cellular_component	0.3697	1	3	2387	27	29181	PGSC0003DMG400039300,PGSC0003DMG400009103,PGSC0003DMG400018939
GO:0051775	response to redox state	biological_process	0.3723	1	2	2387	15	29181	PGSC0003DMG400022027,PGSC0003DMG400022551
GO:0007548	sex differentiation	biological_process	0.37291	1	3	2387	26	29181	PGSC0003DMG400004349,PGSC0003DMG401024930,PGSC0003DMG400022315
GO:0008901	ferredoxin hydrogenase activity	molecular_function	0.37357	1	1	2387	6	29181	PGSC0003DMG400003807
GO:0016699	oxidoreductase activity, acting on hydrogen as donor, iron-sulfur protein as acceptor	molecular_function	0.37357	1	1	2387	6	29181	PGSC0003DMG400003807
GO:0051015	actin filament binding	molecular_function	0.37451	1	4	2387	36	29181	PGSC0003DMG400012589,PGSC0003DMG400018483,PGSC0003DMG400003625,PGSC0003DMG400022942
GO:0006605	protein targeting	biological_process	0.37502	1	41	2387	446	29181	PGSC0003DMG401029267,PGSC0003DMG400008871,PGSC0003DMG400026493,PGSC0003DMG400020587,PGSC0003DMG400019455,PGSC0003DMG400022027,PGSC0003DMG400021282,PGSC0003DMG403026842,PGSC0003DMG402000927,PGSC0003DMG402029631,Novel02118,PGSC0003DMG401016933,PGSC0003DMG400012711,PGSC0003DMG400010007,PGSC0003DMG400001391,PGSC0003DMG400006457,PGSC0003DMG400021343,Novel01267,PGSC0003DMG400007496,PGSC0003DMG400010127…
GO:0003951	NAD+ kinase activity	molecular_function	0.37503	1	2	2387	13	29181	PGSC0003DMG400010913,PGSC0003DMG400019734
GO:0006741	NADP biosynthetic process	biological_process	0.37503	1	2	2387	13	29181	PGSC0003DMG400019734,PGSC0003DMG400010913
GO:0009058	biosynthetic process	biological_process	0.37649	1	740	2387	8649	29181	PGSC0003DMG400015506,PGSC0003DMG400042507,PGSC0003DMG400020344,PGSC0003DMG400032110,PGSC0003DMG400022232,PGSC0003DMG400001520,PGSC0003DMG400012196,PGSC0003DMG400023434,PGSC0003DMG400021203,PGSC0003DMG400039300,PGSC0003DMG400016679,PGSC0003DMG400013401,PGSC0003DMG400004168,PGSC0003DMG400024267,PGSC0003DMG400030246,PGSC0003DMG400015533,PGSC0003DMG400029473,PGSC0003DMG400009103,PGSC0003DMG400015766,…
GO:0004677	DNA-dependent protein kinase activity	molecular_function	0.37769	1	1	2387	6	29181	PGSC0003DMG400024481
GO:0022618	ribonucleoprotein complex assembly	biological_process	0.37772	1	3	2387	24	29181	PGSC0003DMG400030365,PGSC0003DMG400003621,PGSC0003DMG400022027
GO:0016157	sucrose synthase activity	molecular_function	0.3778	1	2	2387	13	29181	PGSC0003DMG400006509,PGSC0003DMG400026428
GO:0004177	aminopeptidase activity	molecular_function	0.37853	1	6	2387	63	29181	PGSC0003DMG400022418,PGSC0003DMG400017386,Novel01048,PGSC0003DMG400027594,PGSC0003DMG400009303,PGSC0003DMG402019176
GO:0044802	single-organism membrane organization	biological_process	0.37858	1	40	2387	427	29181	PGSC0003DMG400003581,PGSC0003DMG400024126,PGSC0003DMG400005839,PGSC0003DMG402029267,PGSC0003DMG400033053,PGSC0003DMG400021177,PGSC0003DMG401015043,PGSC0003DMG400010461,PGSC0003DMG401011206,PGSC0003DMG400003647,PGSC0003DMG400020484,PGSC0003DMG400010619,PGSC0003DMG400013629,PGSC0003DMG400024365,PGSC0003DMG400031248,Novel01267,PGSC0003DMG400021343,PGSC0003DMG400010007,PGSC0003DMG400001391,PGSC0003DM…
GO:0007157	heterophilic cell-cell adhesion via plasma membrane cell adhesion molecules	biological_process	0.3786	1	1	2387	7	29181	PGSC0003DMG401006771
GO:0009307	DNA restriction-modification system	biological_process	0.3792	1	13	2387	136	29181	PGSC0003DMG400030963,PGSC0003DMG400019574,PGSC0003DMG400011045,PGSC0003DMG400004252,PGSC0003DMG400009016,PGSC0003DMG400004312,PGSC0003DMG400003653,PGSC0003DMG400010798,PGSC0003DMG400028560,PGSC0003DMG401015876,PGSC0003DMG400014694,PGSC0003DMG400028229,PGSC0003DMG400021659
GO:0044355	clearance of foreign intracellular DNA	biological_process	0.3792	1	13	2387	136	29181	PGSC0003DMG400021659,PGSC0003DMG400028229,PGSC0003DMG401015876,PGSC0003DMG400014694,PGSC0003DMG400028560,PGSC0003DMG400010798,PGSC0003DMG400003653,PGSC0003DMG400004312,PGSC0003DMG400009016,PGSC0003DMG400011045,PGSC0003DMG400004252,PGSC0003DMG400019574,PGSC0003DMG400030963
GO:0018836	alkylmercury lyase activity	molecular_function	0.37995	1	1	2387	5	29181	PGSC0003DMG400022246
GO:0018941	organomercury metabolic process	biological_process	0.37995	1	1	2387	5	29181	PGSC0003DMG400022246
GO:0018942	organometal metabolic process	biological_process	0.37995	1	1	2387	5	29181	PGSC0003DMG400022246
GO:0046413	organomercury catabolic process	biological_process	0.37995	1	1	2387	5	29181	PGSC0003DMG400022246
GO:0006120	mitochondrial electron transport, NADH to ubiquinone	biological_process	0.38017	1	5	2387	44	29181	PGSC0003DMG400020497,PGSC0003DMG401029267,PGSC0003DMG400024914,PGSC0003DMG400016820,PGSC0003DMG400027693
GO:0009260	ribonucleotide biosynthetic process	biological_process	0.38023	1	33	2387	372	29181	PGSC0003DMG400001896,PGSC0003DMG400028924,PGSC0003DMG400017655,PGSC0003DMG400031029,PGSC0003DMG400009353,PGSC0003DMG400026643,PGSC0003DMG400020484,PGSC0003DMG400008065,PGSC0003DMG400007760,PGSC0003DMG401027166,PGSC0003DMG402026306,PGSC0003DMG400013106,PGSC0003DMG400005926,PGSC0003DMG400007092,PGSC0003DMG402019176,PGSC0003DMG400013857,PGSC0003DMG400022893,PGSC0003DMG401000923,PGSC0003DMG400005256,…
GO:0046390	ribose phosphate biosynthetic process	biological_process	0.38023	1	33	2387	372	29181	PGSC0003DMG400022825,PGSC0003DMG400004995,PGSC0003DMG400023636,PGSC0003DMG400020740,PGSC0003DMG400003906,PGSC0003DMG400022770,PGSC0003DMG402020303,Novel03007,PGSC0003DMG400022417,PGSC0003DMG400032558,PGSC0003DMG400018516,PGSC0003DMG400008065,PGSC0003DMG402026306,PGSC0003DMG400007760,PGSC0003DMG401027166,PGSC0003DMG400009353,PGSC0003DMG400020484,PGSC0003DMG400026643,PGSC0003DMG400031029,PGSC0003DM…
GO:0019887	protein kinase regulator activity	molecular_function	0.3804	1	8	2387	79	29181	PGSC0003DMG400007001,PGSC0003DMG400014513,PGSC0003DMG400021168,PGSC0003DMG400022346,PGSC0003DMG403001724,PGSC0003DMG400017654,Novel01192,PGSC0003DMG400017946
GO:0016310	phosphorylation	biological_process	0.38082	1	177	2387	1817	29181	PGSC0003DMG400028845,PGSC0003DMG400023814,PGSC0003DMG400004312,PGSC0003DMG400027071,PGSC0003DMG400023282,PGSC0003DMG400027693,PGSC0003DMG400030578,PGSC0003DMG400014944,PGSC0003DMG400017596,PGSC0003DMG402010355,PGSC0003DMG400030115,PGSC0003DMG400006916,PGSC0003DMG400011160,PGSC0003DMG400013489,PGSC0003DMG400029615,PGSC0003DMG402027860,PGSC0003DMG400032509,PGSC0003DMG400027683,PGSC0003DMG400025030,…
GO:0009295	nucleoid	cellular_component	0.38082	1	2	2387	14	29181	Novel03519,PGSC0003DMG400009016
GO:0005524	ATP binding	molecular_function	0.38098	1	368	2387	3888	29181	Novel02904,PGSC0003DMG400044006,PGSC0003DMG400013857,PGSC0003DMG400027048,PGSC0003DMG400015492,PGSC0003DMG400000331,PGSC0003DMG400009843,PGSC0003DMG400017728,Novel01966,PGSC0003DMG400027940,PGSC0003DMG400020136,PGSC0003DMG404029448,PGSC0003DMG400023334,PGSC0003DMG400038020,PGSC0003DMG400022312,PGSC0003DMG400005612,PGSC0003DMG400035738,PGSC0003DMG400030849,PGSC0003DMG400031248,PGSC0003DMG400015324…
GO:0004109	coproporphyrinogen oxidase activity	molecular_function	0.38111	1	1	2387	5	29181	PGSC0003DMG400011264
GO:0009059	macromolecule biosynthetic process	biological_process	0.38125	1	567	2387	6647	29181	PGSC0003DMG400013280,PGSC0003DMG402019457,PGSC0003DMG400019693,PGSC0003DMG400027326,PGSC0003DMG400020317,PGSC0003DMG400016892,PGSC0003DMG401002548,PGSC0003DMG400005991,PGSC0003DMG400001569,PGSC0003DMG400011089,PGSC0003DMG400006026,PGSC0003DMG402009663,PGSC0003DMG400001434,PGSC0003DMG400019824,PGSC0003DMG400002045,PGSC0003DMG400027514,PGSC0003DMG400003138,PGSC0003DMG400027594,PGSC0003DMG400007408,…
GO:0005845	mRNA cap binding complex	cellular_component	0.38146	1	2	2387	15	29181	PGSC0003DMG400025847,PGSC0003DMG402015684
GO:0034518	RNA cap binding complex	cellular_component	0.38146	1	2	2387	15	29181	PGSC0003DMG402015684,PGSC0003DMG400025847
GO:0001518	voltage-gated sodium channel complex	cellular_component	0.38167	1	1	2387	7	29181	PGSC0003DMG400003618
GO:0005248	voltage-gated sodium channel activity	molecular_function	0.38167	1	1	2387	7	29181	PGSC0003DMG400003618
GO:0034706	sodium channel complex	cellular_component	0.38167	1	1	2387	7	29181	PGSC0003DMG400003618
GO:0051338	regulation of transferase activity	biological_process	0.38216	1	7	2387	69	29181	PGSC0003DMG400008931,PGSC0003DMG400022209,PGSC0003DMG402013013,PGSC0003DMG400031310,PGSC0003DMG400022061,PGSC0003DMG400023478,PGSC0003DMG400019455
GO:0048029	monosaccharide binding	molecular_function	0.38227	1	2	2387	13	29181	PGSC0003DMG400023799,PGSC0003DMG401014557
GO:0005774	vacuolar membrane	cellular_component	0.38334	1	5	2387	41	29181	PGSC0003DMG401011206,PGSC0003DMG400000663,PGSC0003DMG400010616,PGSC0003DMG400009912,PGSC0003DMG400018516
GO:0044437	vacuolar part	cellular_component	0.38334	1	5	2387	41	29181	PGSC0003DMG400009912,PGSC0003DMG400018516,PGSC0003DMG400000663,PGSC0003DMG400010616,PGSC0003DMG401011206
GO:0016756	glutathione gamma-glutamylcysteinyltransferase activity	molecular_function	0.38361	1	2	2387	14	29181	PGSC0003DMG400023886,Novel01143
GO:0046937	phytochelatin metabolic process	biological_process	0.38361	1	2	2387	14	29181	Novel01143,PGSC0003DMG400023886
GO:0046938	phytochelatin biosynthetic process	biological_process	0.38361	1	2	2387	14	29181	Novel01143,PGSC0003DMG400023886
GO:0010256	endomembrane system organization	biological_process	0.38422	1	13	2387	138	29181	PGSC0003DMG400024205,Novel03396,PGSC0003DMG400011359,PGSC0003DMG400010461,PGSC0003DMG400000434,PGSC0003DMG400018116,PGSC0003DMG402021159,PGSC0003DMG400017655,PGSC0003DMG400000498,PGSC0003DMG400022061,PGSC0003DMG400001520,PGSC0003DMG400027534,PGSC0003DMG400003581
GO:0017004	cytochrome complex assembly	biological_process	0.38488	1	10	2387	106	29181	PGSC0003DMG400026093,PGSC0003DMG400025029,PGSC0003DMG400003807,PGSC0003DMG400013457,PGSC0003DMG400021406,PGSC0003DMG400000001,PGSC0003DMG400009816,PGSC0003DMG400023913,PGSC0003DMG400006835,PGSC0003DMG400022893
GO:0003779	actin binding	molecular_function	0.3853	1	26	2387	273	29181	PGSC0003DMG400006086,PGSC0003DMG400018483,PGSC0003DMG401020463,PGSC0003DMG400021099,PGSC0003DMG400031765,PGSC0003DMG400016997,PGSC0003DMG400025519,PGSC0003DMG400003964,Novel01118,PGSC0003DMG400001398,PGSC0003DMG400015392,Novel01143,PGSC0003DMG400022942,PGSC0003DMG400018116,PGSC0003DMG400003625,PGSC0003DMG400013550,PGSC0003DMG400022027,PGSC0003DMG400012589,PGSC0003DMG400026809,PGSC0003DMG400009353…
GO:0015093	ferrous iron transmembrane transporter activity	molecular_function	0.38599	1	11	2387	102	29181	PGSC0003DMG400003319,PGSC0003DMG400020249,PGSC0003DMG400018427,PGSC0003DMG400010619,PGSC0003DMG400023442,PGSC0003DMG400025262,PGSC0003DMG400005744,PGSC0003DMG400005178,PGSC0003DMG400030425,Novel00273,Novel00993
GO:0015684	ferrous iron transport	biological_process	0.38599	1	11	2387	102	29181	PGSC0003DMG400020249,PGSC0003DMG400003319,PGSC0003DMG400010619,PGSC0003DMG400023442,PGSC0003DMG400018427,PGSC0003DMG400005744,PGSC0003DMG400025262,Novel00993,PGSC0003DMG400030425,Novel00273,PGSC0003DMG400005178
GO:0042138	meiotic DNA double-strand break formation	biological_process	0.38626	1	1	2387	5	29181	Novel00780
GO:0006379	mRNA cleavage	biological_process	0.38698	1	2	2387	16	29181	PGSC0003DMG400002200,PGSC0003DMG400001766
GO:0090501	RNA phosphodiester bond hydrolysis	biological_process	0.38698	1	2	2387	16	29181	PGSC0003DMG400001766,PGSC0003DMG400002200
GO:0031639	plasminogen activation	biological_process	0.38699	1	1	2387	5	29181	PGSC0003DMG400007030
GO:0005578	proteinaceous extracellular matrix	cellular_component	0.38702	1	12	2387	137	29181	PGSC0003DMG400003564,PGSC0003DMG400024604,PGSC0003DMG400020261,PGSC0003DMG400005745,PGSC0003DMG400020039,PGSC0003DMG400028229,PGSC0003DMG400008149,PGSC0003DMG400016820,PGSC0003DMG400035905,PGSC0003DMG400009730,PGSC0003DMG402022215,Novel02292
GO:0009124	nucleoside monophosphate biosynthetic process	biological_process	0.38725	1	29	2387	330	29181	PGSC0003DMG400017655,PGSC0003DMG400001896,PGSC0003DMG400028924,PGSC0003DMG400009847,PGSC0003DMG400003906,PGSC0003DMG400022770,PGSC0003DMG400023636,PGSC0003DMG400020740,PGSC0003DMG400004995,PGSC0003DMG400026643,PGSC0003DMG400020484,PGSC0003DMG400009353,PGSC0003DMG402026306,PGSC0003DMG401027166,PGSC0003DMG400008065,PGSC0003DMG400022825,PGSC0003DMG400013106,PGSC0003DMG400032558,PGSC0003DMG400007092,…
GO:0005850	eukaryotic translation initiation factor 2 complex	cellular_component	0.38744	1	1	2387	5	29181	PGSC0003DMG400010664
GO:0008762	UDP-N-acetylmuramate dehydrogenase activity	molecular_function	0.38746	1	1	2387	5	29181	PGSC0003DMG400029545
GO:0042537	benzene-containing compound metabolic process	biological_process	0.38834	1	2	2387	15	29181	Novel00393,PGSC0003DMG400023881
GO:0006213	pyrimidine nucleoside metabolic process	biological_process	0.38852	1	3	2387	26	29181	PGSC0003DMG400022885,Novel00051,PGSC0003DMG401019352
GO:0006511	ubiquitin-dependent protein catabolic process	biological_process	0.38852	1	26	2387	297	29181	PGSC0003DMG400006555,PGSC0003DMG400019455,PGSC0003DMG400018246,PGSC0003DMG400018437,PGSC0003DMG400001378,PGSC0003DMG400025310,PGSC0003DMG400007012,PGSC0003DMG400017228,PGSC0003DMG400014708,PGSC0003DMG400022209,PGSC0003DMG400006285,PGSC0003DMG401032194,PGSC0003DMG400031765,PGSC0003DMG400023478,PGSC0003DMG400022061,PGSC0003DMG400006185,Novel02803,PGSC0003DMG400008931,PGSC0003DMG401028577,Novel00412…
GO:0009142	nucleoside triphosphate biosynthetic process	biological_process	0.38982	1	25	2387	284	29181	PGSC0003DMG402019176,PGSC0003DMG400013857,PGSC0003DMG400022893,PGSC0003DMG400022417,Novel03007,PGSC0003DMG400005256,PGSC0003DMG400025519,PGSC0003DMG400014217,PGSC0003DMG400021607,PGSC0003DMG400032558,PGSC0003DMG400013106,PGSC0003DMG400005926,PGSC0003DMG400007092,PGSC0003DMG400009353,PGSC0003DMG400026643,PGSC0003DMG400020484,PGSC0003DMG400008065,PGSC0003DMG400022825,PGSC0003DMG402026306,PGSC0003DM…
GO:0009145	purine nucleoside triphosphate biosynthetic process	biological_process	0.38982	1	25	2387	284	29181	PGSC0003DMG400020740,PGSC0003DMG400003906,PGSC0003DMG400022770,PGSC0003DMG400017655,PGSC0003DMG400028924,PGSC0003DMG402026306,PGSC0003DMG401027166,PGSC0003DMG400022825,PGSC0003DMG400008065,PGSC0003DMG400020484,PGSC0003DMG400026643,PGSC0003DMG400009353,PGSC0003DMG400007092,PGSC0003DMG400005926,PGSC0003DMG400013106,PGSC0003DMG400032558,PGSC0003DMG400021607,PGSC0003DMG400014217,PGSC0003DMG400025519,…
GO:0009201	ribonucleoside triphosphate biosynthetic process	biological_process	0.38982	1	25	2387	284	29181	PGSC0003DMG400008065,PGSC0003DMG400022825,PGSC0003DMG401027166,PGSC0003DMG402026306,PGSC0003DMG400009353,PGSC0003DMG400026643,PGSC0003DMG400020484,PGSC0003DMG400022770,PGSC0003DMG400003906,PGSC0003DMG400020740,PGSC0003DMG400028924,PGSC0003DMG400017655,PGSC0003DMG400005256,PGSC0003DMG400014217,PGSC0003DMG400025519,PGSC0003DMG400021607,PGSC0003DMG402019176,PGSC0003DMG400013857,PGSC0003DMG400022893,…
GO:0009206	purine ribonucleoside triphosphate biosynthetic process	biological_process	0.38982	1	25	2387	284	29181	PGSC0003DMG402026306,PGSC0003DMG401027166,PGSC0003DMG400008065,PGSC0003DMG400022825,PGSC0003DMG400026643,PGSC0003DMG400020484,PGSC0003DMG400009353,PGSC0003DMG400003906,PGSC0003DMG400022770,PGSC0003DMG400020740,PGSC0003DMG400017655,PGSC0003DMG400028924,PGSC0003DMG400021607,PGSC0003DMG400005256,PGSC0003DMG400014217,PGSC0003DMG400025519,PGSC0003DMG400022893,PGSC0003DMG400022417,Novel03007,PGSC0003DM…
GO:0048646	anatomical structure formation involved in morphogenesis	biological_process	0.38989	1	12	2387	126	29181	PGSC0003DMG402024549,PGSC0003DMG400006086,PGSC0003DMG400016811,PGSC0003DMG400031007,PGSC0003DMG400027323,PGSC0003DMG400010710,PGSC0003DMG402012256,PGSC0003DMG400021255,PGSC0003DMG400001544,PGSC0003DMG400010041,PGSC0003DMG400010413,PGSC0003DMG400016544
GO:0007091	metaphase/anaphase transition of mitotic cell cycle	biological_process	0.39085	1	6	2387	58	29181	PGSC0003DMG400019455,PGSC0003DMG400023478,PGSC0003DMG400022061,PGSC0003DMG402013013,PGSC0003DMG400022209,PGSC0003DMG400008931
GO:0010965	regulation of mitotic sister chromatid separation	biological_process	0.39085	1	6	2387	58	29181	PGSC0003DMG400022209,PGSC0003DMG400008931,PGSC0003DMG402013013,PGSC0003DMG400022061,PGSC0003DMG400023478,PGSC0003DMG400019455
GO:0030071	regulation of mitotic metaphase/anaphase transition	biological_process	0.39085	1	6	2387	58	29181	PGSC0003DMG400019455,PGSC0003DMG400023478,PGSC0003DMG400022061,PGSC0003DMG402013013,PGSC0003DMG400008931,PGSC0003DMG400022209
GO:0031145	anaphase-promoting complex-dependent proteasomal ubiquitin-dependent protein catabolic process	biological_process	0.39085	1	6	2387	58	29181	PGSC0003DMG400022061,PGSC0003DMG400023478,PGSC0003DMG400019455,PGSC0003DMG400008931,PGSC0003DMG400022209,PGSC0003DMG402013013
GO:0032434	regulation of proteasomal ubiquitin-dependent protein catabolic process	biological_process	0.39085	1	6	2387	58	29181	PGSC0003DMG402013013,PGSC0003DMG400022209,PGSC0003DMG400008931,PGSC0003DMG400019455,PGSC0003DMG400023478,PGSC0003DMG400022061
GO:0033044	regulation of chromosome organization	biological_process	0.39085	1	6	2387	58	29181	PGSC0003DMG400023478,PGSC0003DMG400022061,PGSC0003DMG400019455,PGSC0003DMG400022209,PGSC0003DMG400008931,PGSC0003DMG402013013
GO:0033045	regulation of sister chromatid segregation	biological_process	0.39085	1	6	2387	58	29181	PGSC0003DMG400022209,PGSC0003DMG400008931,PGSC0003DMG402013013,PGSC0003DMG400023478,PGSC0003DMG400022061,PGSC0003DMG400019455
GO:0033047	regulation of mitotic sister chromatid segregation	biological_process	0.39085	1	6	2387	58	29181	PGSC0003DMG402013013,PGSC0003DMG400008931,PGSC0003DMG400022209,PGSC0003DMG400019455,PGSC0003DMG400023478,PGSC0003DMG400022061
GO:0044784	metaphase/anaphase transition of cell cycle	biological_process	0.39085	1	6	2387	58	29181	PGSC0003DMG400022209,PGSC0003DMG400008931,PGSC0003DMG402013013,PGSC0003DMG400023478,PGSC0003DMG400022061,PGSC0003DMG400019455
GO:0051306	mitotic sister chromatid separation	biological_process	0.39085	1	6	2387	58	29181	PGSC0003DMG402013013,PGSC0003DMG400008931,PGSC0003DMG400022209,PGSC0003DMG400019455,PGSC0003DMG400023478,PGSC0003DMG400022061
GO:0051983	regulation of chromosome segregation	biological_process	0.39085	1	6	2387	58	29181	PGSC0003DMG400008931,PGSC0003DMG400022209,PGSC0003DMG402013013,PGSC0003DMG400022061,PGSC0003DMG400023478,PGSC0003DMG400019455
GO:1902099	regulation of metaphase/anaphase transition of cell cycle	biological_process	0.39085	1	6	2387	58	29181	PGSC0003DMG402013013,PGSC0003DMG400022209,PGSC0003DMG400008931,PGSC0003DMG400019455,PGSC0003DMG400023478,PGSC0003DMG400022061
GO:0019359	nicotinamide nucleotide biosynthetic process	biological_process	0.39113	1	3	2387	22	29181	PGSC0003DMG400019734,PGSC0003DMG400010913,PGSC0003DMG400018194
GO:0009086	methionine biosynthetic process	biological_process	0.39122	1	2	2387	16	29181	PGSC0003DMG400019717,PGSC0003DMG400026156
GO:0042025	host cell nucleus	cellular_component	0.39142	1	14	2387	154	29181	PGSC0003DMG400003103,PGSC0003DMG400021719,PGSC0003DMG400031256,PGSC0003DMG400028276,PGSC0003DMG400003906,PGSC0003DMG401026447,PGSC0003DMG400009981,PGSC0003DMG400027534,PGSC0003DMG400022345,PGSC0003DMG400001246,PGSC0003DMG400023334,PGSC0003DMG400005484,PGSC0003DMG400010620,PGSC0003DMG400033030
GO:0016247	channel regulator activity	molecular_function	0.39173	1	21	2387	236	29181	PGSC0003DMG400014722,PGSC0003DMG400031821,PGSC0003DMG400024205,PGSC0003DMG400011175,PGSC0003DMG400011414,PGSC0003DMG400008563,PGSC0003DMG400027770,PGSC0003DMG400018875,PGSC0003DMG400003381,PGSC0003DMG400003975,PGSC0003DMG400008873,PGSC0003DMG400009821,PGSC0003DMG400025738,PGSC0003DMG400031029,PGSC0003DMG401024877,PGSC0003DMG400023569,PGSC0003DMG400023710,PGSC0003DMG400009353,PGSC0003DMG400024752,…
GO:1901135	carbohydrate derivative metabolic process	biological_process	0.39184	1	115	2387	1297	29181	Novel03131,PGSC0003DMG400018369,PGSC0003DMG400018405,PGSC0003DMG400009941,PGSC0003DMG400002359,PGSC0003DMG400011479,PGSC0003DMG400032558,Novel03161,PGSC0003DMG400018516,PGSC0003DMG400024701,PGSC0003DMG400003073,PGSC0003DMG400003522,PGSC0003DMG400015766,Novel03007,PGSC0003DMG400009847,PGSC0003DMG400033031,Novel01389,PGSC0003DMG400010691,PGSC0003DMG401019352,PGSC0003DMG400024771,PGSC0003DMG40000011…
GO:0033646	host intracellular part	cellular_component	0.39187	1	18	2387	195	29181	PGSC0003DMG400022345,PGSC0003DMG400009981,PGSC0003DMG401026447,PGSC0003DMG400027534,PGSC0003DMG400005484,PGSC0003DMG400021719,PGSC0003DMG400003103,PGSC0003DMG400028276,PGSC0003DMG400027180,PGSC0003DMG400001246,PGSC0003DMG400023334,PGSC0003DMG400010620,PGSC0003DMG400033030,PGSC0003DMG400018107,PGSC0003DMG400006975,PGSC0003DMG400022860,PGSC0003DMG400031256,PGSC0003DMG400003906
GO:0043656	intracellular region of host	cellular_component	0.39187	1	18	2387	195	29181	PGSC0003DMG400027180,PGSC0003DMG400003103,PGSC0003DMG400021719,PGSC0003DMG400028276,PGSC0003DMG400005484,PGSC0003DMG400009981,PGSC0003DMG401026447,PGSC0003DMG400027534,PGSC0003DMG400022345,PGSC0003DMG400003906,PGSC0003DMG400022860,PGSC0003DMG400006975,PGSC0003DMG400018107,PGSC0003DMG400031256,PGSC0003DMG400023334,PGSC0003DMG400010620,PGSC0003DMG400033030,PGSC0003DMG400001246
GO:0006820	anion transport	biological_process	0.39271	1	36	2387	384	29181	PGSC0003DMG400011759,PGSC0003DMG400022186,PGSC0003DMG402006035,PGSC0003DMG400024609,PGSC0003DMG400030519,PGSC0003DMG400013962,PGSC0003DMG400005455,PGSC0003DMG400011000,PGSC0003DMG402019176,Novel02265,PGSC0003DMG400004061,PGSC0003DMG400014701,PGSC0003DMG400000351,Novel00688,PGSC0003DMG400023966,PGSC0003DMG400020136,PGSC0003DMG402028252,PGSC0003DMG401002977,PGSC0003DMG400009994,PGSC0003DMG400022255…
GO:0009892	negative regulation of metabolic process	biological_process	0.39295	1	29	2387	308	29181	PGSC0003DMG402013013,PGSC0003DMG400010913,PGSC0003DMG400033569,PGSC0003DMG400010677,PGSC0003DMG401007235,PGSC0003DMG400030322,PGSC0003DMG400008149,PGSC0003DMG402008019,PGSC0003DMG400030985,PGSC0003DMG400008931,PGSC0003DMG400024984,PGSC0003DMG402000479,PGSC0003DMG400010438,PGSC0003DMG402027860,PGSC0003DMG400022551,PGSC0003DMG400022061,PGSC0003DMG400023478,PGSC0003DMG400020541,PGSC0003DMG400025847,…
GO:0006865	amino acid transport	biological_process	0.39364	1	10	2387	95	29181	Novel00688,PGSC0003DMG400022255,PGSC0003DMG400024609,PGSC0003DMG400030519,PGSC0003DMG400013962,Novel03229,PGSC0003DMG400005455,PGSC0003DMG400010866,PGSC0003DMG400004061,PGSC0003DMG400003540
GO:0008612	peptidyl-lysine modification to peptidyl-hypusine	biological_process	0.39467	1	1	2387	6	29181	PGSC0003DMG400031375
GO:0000229	cytoplasmic chromosome	cellular_component	0.3948	1	1	2387	5	29181	Novel03519
GO:0000262	mitochondrial chromosome	cellular_component	0.3948	1	1	2387	5	29181	Novel03519
GO:0042645	mitochondrial nucleoid	cellular_component	0.3948	1	1	2387	5	29181	Novel03519
GO:1901698	response to nitrogen compound	biological_process	0.39487	1	2	2387	15	29181	PGSC0003DMG400000351,Novel02265
GO:0048468	cell development	biological_process	0.3949	1	12	2387	121	29181	PGSC0003DMG400002231,PGSC0003DMG400006086,PGSC0003DMG400016389,PGSC0003DMG400000394,PGSC0003DMG400016544,PGSC0003DMG400013949,PGSC0003DMG400010413,PGSC0003DMG400030663,PGSC0003DMG400016465,PGSC0003DMG400019615,PGSC0003DMG400027703,PGSC0003DMG400029165
GO:0015081	sodium ion transmembrane transporter activity	molecular_function	0.39491	1	9	2387	98	29181	PGSC0003DMG400024266,PGSC0003DMG400027061,PGSC0003DMG400009113,Novel02683,PGSC0003DMG400030519,PGSC0003DMG400003618,PGSC0003DMG400004061,PGSC0003DMG400005301,PGSC0003DMG400022604
GO:0008616	queuosine biosynthetic process	biological_process	0.39524	1	2	2387	15	29181	PGSC0003DMG400030838,PGSC0003DMG400021644
GO:0046116	queuosine metabolic process	biological_process	0.39524	1	2	2387	15	29181	PGSC0003DMG400030838,PGSC0003DMG400021644
GO:0004713	protein tyrosine kinase activity	molecular_function	0.39529	1	4	2387	38	29181	PGSC0003DMG400021422,PGSC0003DMG400004995,PGSC0003DMG400032129,PGSC0003DMG400030680
GO:0043570	maintenance of DNA repeat elements	biological_process	0.39576	1	1	2387	5	29181	PGSC0003DMG400009290
GO:0043571	maintenance of CRISPR repeat elements	biological_process	0.39576	1	1	2387	5	29181	PGSC0003DMG400009290
GO:0006119	oxidative phosphorylation	biological_process	0.39586	1	10	2387	103	29181	PGSC0003DMG400020497,PGSC0003DMG400030714,PGSC0003DMG400027693,PGSC0003DMG400016820,PGSC0003DMG400000367,PGSC0003DMG401029267,PGSC0003DMG400024914,PGSC0003DMG400029615,PGSC0003DMG400013550,PGSC0003DMG400035389
GO:0042773	ATP synthesis coupled electron transport	biological_process	0.39586	1	10	2387	103	29181	PGSC0003DMG400016820,PGSC0003DMG400027693,PGSC0003DMG400000367,PGSC0003DMG400020497,PGSC0003DMG400030714,PGSC0003DMG400029615,PGSC0003DMG400035389,PGSC0003DMG400013550,PGSC0003DMG401029267,PGSC0003DMG400024914
GO:0016272	prefoldin complex	cellular_component	0.39594	1	6	2387	65	29181	PGSC0003DMG400017570,PGSC0003DMG400012523,PGSC0003DMG400030843,PGSC0003DMG400022352,PGSC0003DMG400012711,PGSC0003DMG400022061
GO:0005216	ion channel activity	molecular_function	0.39664	1	39	2387	423	29181	PGSC0003DMG400024266,PGSC0003DMG403002548,PGSC0003DMG400018811,PGSC0003DMG400018133,PGSC0003DMG400009914,PGSC0003DMG400008839,PGSC0003DMG400008840,PGSC0003DMG400012528,PGSC0003DMG402007138,Novel02920,PGSC0003DMG400006975,PGSC0003DMG400023799,Novel02258,PGSC0003DMG400021862,PGSC0003DMG400026518,PGSC0003DMG400005828,PGSC0003DMG400011330,PGSC0003DMG400020215,PGSC0003DMG400003618,PGSC0003DMG401024472…
GO:0022838	substrate-specific channel activity	molecular_function	0.39664	1	39	2387	423	29181	Novel02258,PGSC0003DMG400023799,PGSC0003DMG400021862,Novel02920,PGSC0003DMG400006975,PGSC0003DMG401024472,PGSC0003DMG400026518,PGSC0003DMG400003618,PGSC0003DMG400011330,PGSC0003DMG400020215,PGSC0003DMG400005828,PGSC0003DMG400024266,PGSC0003DMG403002548,PGSC0003DMG400018133,PGSC0003DMG400018811,PGSC0003DMG400009914,PGSC0003DMG402007138,PGSC0003DMG400012528,PGSC0003DMG400008839,PGSC0003DMG400008840…
GO:0016651	oxidoreductase activity, acting on NAD(P)H	molecular_function	0.39691	1	24	2387	262	29181	PGSC0003DMG400031833,PGSC0003DMG400029615,PGSC0003DMG400007129,PGSC0003DMG400020497,PGSC0003DMG400021399,PGSC0003DMG400003103,PGSC0003DMG400016820,PGSC0003DMG400000367,PGSC0003DMG400015168,PGSC0003DMG401029267,PGSC0003DMG400032563,PGSC0003DMG401019352,PGSC0003DMG400002231,PGSC0003DMG400020053,PGSC0003DMG400028578,PGSC0003DMG400013550,PGSC0003DMG400035389,PGSC0003DMG400021644,PGSC0003DMG401029813,…
GO:0007265	Ras protein signal transduction	biological_process	0.39694	1	3	2387	24	29181	PGSC0003DMG400000932,PGSC0003DMG400019203,Novel02038
GO:0046578	regulation of Ras protein signal transduction	biological_process	0.39694	1	3	2387	24	29181	Novel02038,PGSC0003DMG400019203,PGSC0003DMG400000932
GO:0016051	carbohydrate biosynthetic process	biological_process	0.39762	1	36	2387	387	29181	PGSC0003DMG400017572,PGSC0003DMG400005828,PGSC0003DMG400010556,PGSC0003DMG400021083,PGSC0003DMG400008871,PGSC0003DMG400020619,PGSC0003DMG400027925,PGSC0003DMG400017610,Novel00377,Novel02306,PGSC0003DMG400015766,PGSC0003DMG400009279,PGSC0003DMG400027916,PGSC0003DMG400033932,PGSC0003DMG400015392,PGSC0003DMG400003614,PGSC0003DMG400010413,PGSC0003DMG400006829,PGSC0003DMG400009941,PGSC0003DMG400024701…
GO:0044702	single organism reproductive process	biological_process	0.39842	1	18	2387	195	29181	PGSC0003DMG400010413,PGSC0003DMG400016544,PGSC0003DMG400027192,PGSC0003DMG400006086,PGSC0003DMG401013540,PGSC0003DMG400014873,PGSC0003DMG400003581,PGSC0003DMG400030478,PGSC0003DMG402009663,PGSC0003DMG400000836,PGSC0003DMG400033031,PGSC0003DMG400021629,PGSC0003DMG400002231,PGSC0003DMG400013550,PGSC0003DMG400004349,PGSC0003DMG400021659,PGSC0003DMG400029546,PGSC0003DMG400013280
GO:0020012	evasion or tolerance of host immune response	biological_process	0.39858	1	4	2387	35	29181	PGSC0003DMG400020519,PGSC0003DMG400023341,PGSC0003DMG400022860,PGSC0003DMG400006975
GO:0051805	evasion or tolerance of immune response of other organism involved in symbiotic interaction	biological_process	0.39858	1	4	2387	35	29181	PGSC0003DMG400022860,PGSC0003DMG400006975,PGSC0003DMG400020519,PGSC0003DMG400023341
GO:0052564	response to immune response of other organism involved in symbiotic interaction	biological_process	0.39858	1	4	2387	35	29181	PGSC0003DMG400022860,PGSC0003DMG400006975,PGSC0003DMG400023341,PGSC0003DMG400020519
GO:0052572	response to host immune response	biological_process	0.39858	1	4	2387	35	29181	PGSC0003DMG400020519,PGSC0003DMG400023341,PGSC0003DMG400022860,PGSC0003DMG400006975
GO:0004784	superoxide dismutase activity	molecular_function	0.39935	1	2	2387	18	29181	PGSC0003DMG400002400,PGSC0003DMG400016647
GO:0016721	oxidoreductase activity, acting on superoxide radicals as acceptor	molecular_function	0.39935	1	2	2387	18	29181	PGSC0003DMG400002400,PGSC0003DMG400016647
GO:0009653	anatomical structure morphogenesis	biological_process	0.3998	1	27	2387	289	29181	PGSC0003DMG400021255,PGSC0003DMG400013949,PGSC0003DMG400001544,PGSC0003DMG400027323,PGSC0003DMG400016465,PGSC0003DMG400024887,PGSC0003DMG400027964,PGSC0003DMG400000394,PGSC0003DMG400016389,PGSC0003DMG400016544,PGSC0003DMG400010041,PGSC0003DMG400010413,PGSC0003DMG400002992,PGSC0003DMG400030663,PGSC0003DMG400010710,PGSC0003DMG402012256,PGSC0003DMG400027703,PGSC0003DMG400029165,PGSC0003DMG400031007,…
GO:0009308	amine metabolic process	biological_process	0.39982	1	18	2387	187	29181	Novel00393,PGSC0003DMG400023306,PGSC0003DMG400017203,PGSC0003DMG400006129,PGSC0003DMG400013073,PGSC0003DMG402002262,PGSC0003DMG400017157,Novel00141,PGSC0003DMG400027131,PGSC0003DMG400024889,PGSC0003DMG400012701,PGSC0003DMG402031196,PGSC0003DMG402029631,PGSC0003DMG400004723,PGSC0003DMG400030425,PGSC0003DMG400031248,PGSC0003DMG400000343,PGSC0003DMG400008801
GO:0015298	solute:cation antiporter activity	molecular_function	0.39992	1	7	2387	66	29181	PGSC0003DMG400031029,PGSC0003DMG400005009,PGSC0003DMG400024336,PGSC0003DMG400027061,PGSC0003DMG400019466,PGSC0003DMG400005301,PGSC0003DMG400022604
GO:0015299	solute:proton antiporter activity	molecular_function	0.39992	1	7	2387	66	29181	PGSC0003DMG400005009,PGSC0003DMG400024336,PGSC0003DMG400027061,PGSC0003DMG400019466,PGSC0003DMG400031029,PGSC0003DMG400005301,PGSC0003DMG400022604
GO:0005523	tropomyosin binding	molecular_function	0.40053	1	1	2387	5	29181	PGSC0003DMG400015194
GO:0051694	pointed-end actin filament capping	biological_process	0.40053	1	1	2387	5	29181	PGSC0003DMG400015194
GO:0048013	ephrin receptor signaling pathway	biological_process	0.40054	1	1	2387	6	29181	PGSC0003DMG400031412
GO:0006369	termination of RNA polymerase II transcription	biological_process	0.40061	1	1	2387	5	29181	PGSC0003DMG400002200
GO:0016458	gene silencing	biological_process	0.40085	1	5	2387	44	29181	PGSC0003DMG400030985,PGSC0003DMG402000479,PGSC0003DMG400024388,PGSC0003DMG400008149,PGSC0003DMG400030322
GO:0010639	negative regulation of organelle organization	biological_process	0.40092	1	8	2387	82	29181	PGSC0003DMG400008931,PGSC0003DMG400019455,PGSC0003DMG400023478,PGSC0003DMG400022061,PGSC0003DMG402013013,PGSC0003DMG400015194,PGSC0003DMG400022209,PGSC0003DMG400011222
GO:0034645	cellular macromolecule biosynthetic process	biological_process	0.40136	1	557	2387	6542	29181	PGSC0003DMG403024074,PGSC0003DMG400018234,PGSC0003DMG400008882,PGSC0003DMG400016820,PGSC0003DMG400004191,PGSC0003DMG400017769,PGSC0003DMG400013693,PGSC0003DMG400020541,PGSC0003DMG400025194,PGSC0003DMG400026821,PGSC0003DMG402005133,PGSC0003DMG400001544,Novel01891,Novel01529,PGSC0003DMG400018236,PGSC0003DMG400018389,PGSC0003DMG400004149,PGSC0003DMG400010897,PGSC0003DMG400011824,PGSC0003DMG400009353…
GO:0032505	reproduction of a single-celled organism	biological_process	0.40316	1	15	2387	180	29181	PGSC0003DMG400016203,PGSC0003DMG400022061,PGSC0003DMG400019455,PGSC0003DMG400001417,Novel03379,PGSC0003DMG400012711,PGSC0003DMG400003581,PGSC0003DMG400004995,PGSC0003DMG400017440,PGSC0003DMG400001378,PGSC0003DMG400007092,PGSC0003DMG402024252,PGSC0003DMG401024930,PGSC0003DMG400033569,PGSC0003DMG401020784
GO:0019199	transmembrane receptor protein kinase activity	molecular_function	0.40327	1	4	2387	34	29181	PGSC0003DMG400022420,PGSC0003DMG400010478,PGSC0003DMG400029165,PGSC0003DMG400004061
GO:0005664	nuclear origin of replication recognition complex	cellular_component	0.40431	1	3	2387	26	29181	PGSC0003DMG400027155,PGSC0003DMG400002233,PGSC0003DMG400002821
GO:0015099	nickel cation transmembrane transporter activity	molecular_function	0.40479	1	1	2387	6	29181	PGSC0003DMG400024953
GO:0015675	nickel cation transport	biological_process	0.40479	1	1	2387	6	29181	PGSC0003DMG400024953
GO:0035444	nickel cation transmembrane transport	biological_process	0.40479	1	1	2387	6	29181	PGSC0003DMG400024953
GO:0030029	actin filament-based process	biological_process	0.40544	1	13	2387	132	29181	PGSC0003DMG400022061,PGSC0003DMG400026351,PGSC0003DMG400025519,PGSC0003DMG400031765,PGSC0003DMG400013550,PGSC0003DMG401020463,PGSC0003DMG400010334,PGSC0003DMG400015392,PGSC0003DMG400009912,PGSC0003DMG400028826,PGSC0003DMG400011222,PGSC0003DMG400015194,PGSC0003DMG402011364
GO:0030036	actin cytoskeleton organization	biological_process	0.40544	1	13	2387	132	29181	PGSC0003DMG400010334,PGSC0003DMG400015392,PGSC0003DMG400015194,PGSC0003DMG400011222,PGSC0003DMG400009912,PGSC0003DMG400028826,PGSC0003DMG402011364,PGSC0003DMG400025519,PGSC0003DMG400031765,PGSC0003DMG400026351,PGSC0003DMG400022061,PGSC0003DMG401020463,PGSC0003DMG400013550
GO:0019941	modification-dependent protein catabolic process	biological_process	0.40572	1	26	2387	300	29181	PGSC0003DMG401032194,PGSC0003DMG400006285,PGSC0003DMG400017228,PGSC0003DMG400014708,PGSC0003DMG400022209,PGSC0003DMG400007012,PGSC0003DMG400025310,PGSC0003DMG400001378,PGSC0003DMG400018437,PGSC0003DMG400018246,PGSC0003DMG400019455,PGSC0003DMG400006555,PGSC0003DMG402013013,PGSC0003DMG400014327,PGSC0003DMG400021123,PGSC0003DMG400016019,PGSC0003DMG400022453,PGSC0003DMG400010585,Novel00412,PGSC0003DM…
GO:0043632	modification-dependent macromolecule catabolic process	biological_process	0.40572	1	26	2387	300	29181	PGSC0003DMG400018437,PGSC0003DMG400006555,PGSC0003DMG400018246,PGSC0003DMG400019455,PGSC0003DMG400006285,PGSC0003DMG400007012,PGSC0003DMG400017228,PGSC0003DMG400014708,PGSC0003DMG400022209,PGSC0003DMG401032194,PGSC0003DMG400025310,PGSC0003DMG400001378,PGSC0003DMG401028577,PGSC0003DMG400008931,Novel00412,PGSC0003DMG400010585,PGSC0003DMG400023478,PGSC0003DMG400022061,PGSC0003DMG400031765,Novel02803…
GO:0070851	growth factor receptor binding	molecular_function	0.40672	1	7	2387	75	29181	PGSC0003DMG401002242,PGSC0003DMG400012991,PGSC0003DMG400000695,PGSC0003DMG400023478,PGSC0003DMG401023104,PGSC0003DMG400020520,PGSC0003DMG400000646
GO:0033365	protein localization to organelle	biological_process	0.407	1	40	2387	438	29181	PGSC0003DMG400024126,PGSC0003DMG400003581,PGSC0003DMG400022061,Novel01810,PGSC0003DMG400001417,PGSC0003DMG400025994,PGSC0003DMG400021177,PGSC0003DMG401015043,PGSC0003DMG402029267,PGSC0003DMG400024914,PGSC0003DMG400010619,PGSC0003DMG400003647,PGSC0003DMG400032104,PGSC0003DMG400024365,PGSC0003DMG400031248,PGSC0003DMG401010181,PGSC0003DMG400012711,PGSC0003DMG400010007,PGSC0003DMG400001391,PGSC0003DM…
GO:0004879	RNA polymerase II transcription factor activity, ligand-activated sequence-specific DNA binding	molecular_function	0.40803	1	2	2387	14	29181	PGSC0003DMG400024266,PGSC0003DMG400030246
GO:0004882	androgen receptor activity	molecular_function	0.40803	1	2	2387	14	29181	PGSC0003DMG400024266,PGSC0003DMG400030246
GO:0030521	androgen receptor signaling pathway	biological_process	0.40803	1	2	2387	14	29181	PGSC0003DMG400024266,PGSC0003DMG400030246
GO:0098531	transcription factor activity, direct ligand regulated sequence-specific DNA binding	molecular_function	0.40803	1	2	2387	14	29181	PGSC0003DMG400024266,PGSC0003DMG400030246
GO:0002697	regulation of immune effector process	biological_process	0.40831	1	4	2387	35	29181	PGSC0003DMG400023799,PGSC0003DMG400006975,PGSC0003DMG400022860,PGSC0003DMG400020519
GO:0050688	regulation of defense response to virus	biological_process	0.40831	1	4	2387	35	29181	PGSC0003DMG400023799,PGSC0003DMG400020519,PGSC0003DMG400006975,PGSC0003DMG400022860
GO:0050690	regulation of defense response to virus by virus	biological_process	0.40831	1	4	2387	35	29181	PGSC0003DMG400023799,PGSC0003DMG400020519,PGSC0003DMG400022860,PGSC0003DMG400006975
GO:0043093	FtsZ-dependent cytokinesis	biological_process	0.40853	1	14	2387	168	29181	PGSC0003DMG400033569,PGSC0003DMG401020784,PGSC0003DMG401024930,PGSC0003DMG400007092,PGSC0003DMG402024252,PGSC0003DMG400001378,PGSC0003DMG400017440,PGSC0003DMG400004995,Novel03379,PGSC0003DMG400012711,PGSC0003DMG400019455,PGSC0003DMG400001417,PGSC0003DMG400022061,PGSC0003DMG400016203
GO:0016929	SUMO-specific protease activity	molecular_function	0.40945	1	2	2387	16	29181	PGSC0003DMG400018261,PGSC0003DMG400020484
GO:0032183	SUMO binding	molecular_function	0.40945	1	2	2387	16	29181	PGSC0003DMG400018261,PGSC0003DMG400020484
GO:0070122	isopeptidase activity	molecular_function	0.40945	1	2	2387	16	29181	PGSC0003DMG400018261,PGSC0003DMG400020484
GO:0070138	ubiquitin-like protein-specific isopeptidase activity	molecular_function	0.40945	1	2	2387	16	29181	PGSC0003DMG400020484,PGSC0003DMG400018261
GO:0070140	SUMO-specific isopeptidase activity	molecular_function	0.40945	1	2	2387	16	29181	PGSC0003DMG400020484,PGSC0003DMG400018261
GO:0008443	phosphofructokinase activity	molecular_function	0.40949	1	5	2387	48	29181	PGSC0003DMG400008871,PGSC0003DMG400010007,Novel01389,PGSC0003DMG400004149,PGSC0003DMG400019734
GO:0006518	peptide metabolic process	biological_process	0.40984	1	139	2387	1645	29181	PGSC0003DMG400000457,PGSC0003DMG400016679,PGSC0003DMG400016852,PGSC0003DMG400010572,PGSC0003DMG400022232,PGSC0003DMG400028229,PGSC0003DMG400004912,PGSC0003DMG400002757,PGSC0003DMG402027032,PGSC0003DMG400002287,PGSC0003DMG400042481,PGSC0003DMG400014444,Novel00317,PGSC0003DMG400005466,PGSC0003DMG400024986,PGSC0003DMG400027323,PGSC0003DMG400016465,PGSC0003DMG400025811,PGSC0003DMG400015232,Novel03043…
GO:0015370	solute:sodium symporter activity	molecular_function	0.41027	1	2	2387	17	29181	PGSC0003DMG400004061,PGSC0003DMG400030519
GO:0005086	ARF guanyl-nucleotide exchange factor activity	molecular_function	0.41076	1	2	2387	14	29181	Novel02038,PGSC0003DMG400000932
GO:0032011	ARF protein signal transduction	biological_process	0.41076	1	2	2387	14	29181	Novel02038,PGSC0003DMG400000932
GO:0032012	regulation of ARF protein signal transduction	biological_process	0.41076	1	2	2387	14	29181	Novel02038,PGSC0003DMG400000932
GO:0000390	spliceosomal complex disassembly	biological_process	0.41109	1	1	2387	7	29181	PGSC0003DMG400012711
GO:0005684	U2-type spliceosomal complex	cellular_component	0.41109	1	1	2387	7	29181	PGSC0003DMG400012711
GO:0032988	ribonucleoprotein complex disassembly	biological_process	0.41109	1	1	2387	7	29181	PGSC0003DMG400012711
GO:0071008	U2-type post-mRNA release spliceosomal complex	cellular_component	0.41109	1	1	2387	7	29181	PGSC0003DMG400012711
GO:0071014	post-mRNA release spliceosomal complex	cellular_component	0.41109	1	1	2387	7	29181	PGSC0003DMG400012711
GO:0034654	nucleobase-containing compound biosynthetic process	biological_process	0.41174	1	409	2387	4789	29181	PGSC0003DMG400025519,PGSC0003DMG400004706,PGSC0003DMG400021341,PGSC0003DMG400012554,PGSC0003DMG400032166,PGSC0003DMG402019176,PGSC0003DMG400019620,PGSC0003DMG400030017,PGSC0003DMG400015241,PGSC0003DMG400015104,PGSC0003DMG400005904,PGSC0003DMG400014327,PGSC0003DMG400030714,PGSC0003DMG400010620,PGSC0003DMG400024971,PGSC0003DMG400012160,PGSC0003DMG402000306,PGSC0003DMG401011001,PGSC0003DMG401004023,…
GO:0008217	regulation of blood pressure	biological_process	0.41232	1	2	2387	15	29181	PGSC0003DMG400003581,PGSC0003DMG402002262
GO:0042311	vasodilation	biological_process	0.41232	1	2	2387	15	29181	PGSC0003DMG400003581,PGSC0003DMG402002262
GO:0042312	regulation of vasodilation	biological_process	0.41232	1	2	2387	15	29181	PGSC0003DMG402002262,PGSC0003DMG400003581
GO:0018492	carbon-monoxide dehydrogenase (acceptor) activity	molecular_function	0.41332	1	1	2387	5	29181	PGSC0003DMG400007129
GO:0019033	viral tegument	cellular_component	0.41414	1	4	2387	39	29181	PGSC0003DMG400017195,PGSC0003DMG400019697,PGSC0003DMG400005742,PGSC0003DMG400000172
GO:0072329	monocarboxylic acid catabolic process	biological_process	0.4144	1	5	2387	45	29181	PGSC0003DMG400027002,PGSC0003DMG400027192,PGSC0003DMG400023881,PGSC0003DMG400010334,PGSC0003DMG400020620
GO:0005985	sucrose metabolic process	biological_process	0.41443	1	3	2387	24	29181	PGSC0003DMG400021341,PGSC0003DMG400026428,PGSC0003DMG400006509
GO:0052855	ADP-dependent NAD(P)H-hydrate dehydratase activity	molecular_function	0.41529	1	1	2387	5	29181	PGSC0003DMG400003725
GO:0008649	rRNA methyltransferase activity	molecular_function	0.41587	1	4	2387	37	29181	Novel03182,PGSC0003DMG400013424,PGSC0003DMG400000343,PGSC0003DMG400014268
GO:0015629	actin cytoskeleton	cellular_component	0.41616	1	11	2387	115	29181	Novel00773,PGSC0003DMG400014709,PGSC0003DMG400011222,PGSC0003DMG400032104,PGSC0003DMG402011364,PGSC0003DMG400026351,PGSC0003DMG400011264,PGSC0003DMG400022027,Novel02867,PGSC0003DMG400027131,PGSC0003DMG400025028
GO:0044271	cellular nitrogen compound biosynthetic process	biological_process	0.41665	1	551	2387	6512	29181	PGSC0003DMG400016697,PGSC0003DMG400033615,PGSC0003DMG400018157,PGSC0003DMG400022825,PGSC0003DMG400010338,PGSC0003DMG402028796,PGSC0003DMG400027192,PGSC0003DMG400015392,PGSC0003DMG400010041,PGSC0003DMG402003606,PGSC0003DMG400022417,PGSC0003DMG400028520,PGSC0003DMG400004005,PGSC0003DMG400010478,PGSC0003DMG400021287,PGSC0003DMG400030637,PGSC0003DMG400026534,PGSC0003DMG400005040,PGSC0003DMG400009475,…
GO:0019682	glyceraldehyde-3-phosphate metabolic process	biological_process	0.4177	1	2	2387	17	29181	PGSC0003DMG400018369,PGSC0003DMG400021199
GO:0008406	gonad development	biological_process	0.41876	1	1	2387	5	29181	PGSC0003DMG400004349
GO:0045137	development of primary sexual characteristics	biological_process	0.41876	1	1	2387	5	29181	PGSC0003DMG400004349
GO:0048608	reproductive structure development	biological_process	0.41876	1	1	2387	5	29181	PGSC0003DMG400004349
GO:0061458	reproductive system development	biological_process	0.41876	1	1	2387	5	29181	PGSC0003DMG400004349
GO:0004482	mRNA (guanine-N7-)-methyltransferase activity	molecular_function	0.41898	1	1	2387	8	29181	PGSC0003DMG400030849
GO:0019988	charged-tRNA amino acid modification	biological_process	0.41921	1	2	2387	16	29181	PGSC0003DMG400022209,PGSC0003DMG400030092
GO:0043399	tRNA A64-2'-O-ribosylphosphate transferase activity	molecular_function	0.41921	1	2	2387	16	29181	PGSC0003DMG400022209,PGSC0003DMG400030092
GO:0035438	cyclic-di-GMP binding	molecular_function	0.41949	1	1	2387	6	29181	PGSC0003DMG400003138
GO:0030904	retromer complex	cellular_component	0.41957	1	1	2387	5	29181	PGSC0003DMG400003584
GO:0006040	amino sugar metabolic process	biological_process	0.41992	1	6	2387	61	29181	PGSC0003DMG400027415,PGSC0003DMG400000112,Novel01597,PGSC0003DMG400031217,Novel01122,PGSC0003DMG402024871
GO:0042255	ribosome assembly	biological_process	0.42097	1	1	2387	6	29181	PGSC0003DMG400030365
GO:0042256	mature ribosome assembly	biological_process	0.42097	1	1	2387	6	29181	PGSC0003DMG400030365
GO:0006418	tRNA aminoacylation for protein translation	biological_process	0.42105	1	18	2387	189	29181	Novel02246,PGSC0003DMG400025126,PGSC0003DMG400016679,PGSC0003DMG402005133,PGSC0003DMG400011521,PGSC0003DMG400023334,PGSC0003DMG400028229,PGSC0003DMG400014694,PGSC0003DMG400016820,Novel00317,PGSC0003DMG400025166,Novel03074,PGSC0003DMG400018234,PGSC0003DMG400010338,PGSC0003DMG400032166,PGSC0003DMG402007138,PGSC0003DMG402019176,PGSC0003DMG400001398
GO:0006413	translational initiation	biological_process	0.42125	1	11	2387	122	29181	PGSC0003DMG400018811,PGSC0003DMG400016697,PGSC0003DMG400005991,PGSC0003DMG400026534,PGSC0003DMG400016852,PGSC0003DMG400025373,PGSC0003DMG400022713,PGSC0003DMG400022216,PGSC0003DMG400007016,PGSC0003DMG400011645,PGSC0003DMG400025847
GO:0008810	cellulase activity	molecular_function	0.42162	1	2	2387	18	29181	PGSC0003DMG400019332,PGSC0003DMG400030684
GO:0033539	fatty acid beta-oxidation using acyl-CoA dehydrogenase	biological_process	0.42249	1	1	2387	5	29181	PGSC0003DMG400027192
GO:0051321	meiotic cell cycle	biological_process	0.42259	1	10	2387	102	29181	PGSC0003DMG400017744,PGSC0003DMG400002021,PGSC0003DMG400000836,PGSC0003DMG400033031,PGSC0003DMG400013550,PGSC0003DMG400012795,PGSC0003DMG400021629,Novel00780,PGSC0003DMG400012947,PGSC0003DMG400017691
GO:0060590	ATPase regulator activity	molecular_function	0.42282	1	11	2387	117	29181	PGSC0003DMG402006496,PGSC0003DMG400000498,PGSC0003DMG400027438,PGSC0003DMG400020827,PGSC0003DMG400002400,PGSC0003DMG402008019,PGSC0003DMG400014722,PGSC0003DMG400004723,PGSC0003DMG400000292,PGSC0003DMG400008873,PGSC0003DMG401020784
GO:0043038	amino acid activation	biological_process	0.42291	1	20	2387	211	29181	PGSC0003DMG400010338,Novel00317,Novel03074,PGSC0003DMG400025166,PGSC0003DMG400018234,PGSC0003DMG400016820,PGSC0003DMG400032792,PGSC0003DMG400001398,PGSC0003DMG400013857,PGSC0003DMG402007138,PGSC0003DMG402019176,PGSC0003DMG400032166,PGSC0003DMG400016679,PGSC0003DMG402005133,PGSC0003DMG400025126,Novel02246,PGSC0003DMG400014694,PGSC0003DMG400028229,PGSC0003DMG400023334,PGSC0003DMG400011521
GO:0043039	tRNA aminoacylation	biological_process	0.42291	1	20	2387	211	29181	PGSC0003DMG400016679,PGSC0003DMG402005133,Novel02246,PGSC0003DMG400025126,PGSC0003DMG400014694,PGSC0003DMG400028229,PGSC0003DMG400023334,PGSC0003DMG400011521,PGSC0003DMG400010338,PGSC0003DMG400025166,PGSC0003DMG400018234,Novel03074,Novel00317,PGSC0003DMG400016820,PGSC0003DMG400001398,PGSC0003DMG400032792,PGSC0003DMG402007138,PGSC0003DMG402019176,PGSC0003DMG400013857,PGSC0003DMG400032166
GO:0044711	single-organism biosynthetic process	biological_process	0.4232	1	205	2387	2306	29181	PGSC0003DMG400022232,PGSC0003DMG400032110,PGSC0003DMG400020344,Novel02713,PGSC0003DMG400000112,PGSC0003DMG400038451,PGSC0003DMG400004168,PGSC0003DMG400028666,PGSC0003DMG400022181,PGSC0003DMG400022214,PGSC0003DMG400029473,PGSC0003DMG400015766,PGSC0003DMG400018516,PGSC0003DMG400031375,PGSC0003DMG400009941,PGSC0003DMG400010413,Novel03131,Novel03299,PGSC0003DMG400018437,PGSC0003DMG400029792,PGSC0003D…
GO:0046933	proton-transporting ATP synthase activity, rotational mechanism	molecular_function	0.42323	1	5	2387	58	29181	PGSC0003DMG400026643,PGSC0003DMG400005256,PGSC0003DMG400003906,PGSC0003DMG400007092,PGSC0003DMG400020740
GO:0007051	spindle organization	biological_process	0.42326	1	5	2387	51	29181	PGSC0003DMG401002977,PGSC0003DMG400026577,PGSC0003DMG402002977,PGSC0003DMG400016198,PGSC0003DMG400023607
GO:0006091	generation of precursor metabolites and energy	biological_process	0.42369	1	55	2387	607	29181	PGSC0003DMG400021248,PGSC0003DMG400013550,PGSC0003DMG400035389,PGSC0003DMG400024914,PGSC0003DMG400027693,PGSC0003DMG400014944,PGSC0003DMG400020962,PGSC0003DMG400001896,PGSC0003DMG400003807,Novel02461,PGSC0003DMG400008014,PGSC0003DMG400012590,PGSC0003DMG400017186,PGSC0003DMG400029615,PGSC0003DMG400009098,PGSC0003DMG400020422,PGSC0003DMG402027860,PGSC0003DMG400019734,PGSC0003DMG400001998,PGSC0003DM…
GO:0030176	integral component of endoplasmic reticulum membrane	cellular_component	0.42389	1	10	2387	111	29181	Novel00461,PGSC0003DMG400028497,PGSC0003DMG400019635,Novel01254,PGSC0003DMG400014403,PGSC0003DMG400012066,PGSC0003DMG400018781,PGSC0003DMG400017407,PGSC0003DMG400028412,PGSC0003DMG400005009
GO:0031227	intrinsic component of endoplasmic reticulum membrane	cellular_component	0.42389	1	10	2387	111	29181	PGSC0003DMG400017407,PGSC0003DMG400018781,PGSC0003DMG400012066,PGSC0003DMG400028412,PGSC0003DMG400005009,Novel00461,PGSC0003DMG400014403,Novel01254,PGSC0003DMG400028497,PGSC0003DMG400019635
GO:0030131	clathrin adaptor complex	cellular_component	0.42466	1	4	2387	34	29181	PGSC0003DMG400033031,PGSC0003DMG400014497,PGSC0003DMG402029307,PGSC0003DMG400013022
GO:0031386	protein tag	molecular_function	0.42566	1	2	2387	18	29181	PGSC0003DMG400015378,Novel00015
GO:0015925	galactosidase activity	molecular_function	0.42725	1	5	2387	45	29181	Novel02174,Novel03280,PGSC0003DMG400013523,PGSC0003DMG400026430,PGSC0003DMG400003465
GO:0009427	bacterial-type flagellum basal body, distal rod, L ring	cellular_component	0.42729	1	1	2387	7	29181	PGSC0003DMG400008438
GO:0033554	cellular response to stress	biological_process	0.42755	1	91	2387	1000	29181	PGSC0003DMG400022885,PGSC0003DMG400003380,PGSC0003DMG400003069,Novel01966,PGSC0003DMG401026923,PGSC0003DMG400003581,PGSC0003DMG400015492,PGSC0003DMG400021214,PGSC0003DMG400004415,PGSC0003DMG400005147,PGSC0003DMG400022157,PGSC0003DMG400032104,PGSC0003DMG400024365,PGSC0003DMG402004578,PGSC0003DMG400014225,Novel02174,PGSC0003DMG401031045,PGSC0003DMG400006034,PGSC0003DMG400004579,Novel02221,PGSC0003D…
GO:0003008	system process	biological_process	0.42783	1	11	2387	118	29181	PGSC0003DMG402026306,PGSC0003DMG400001634,PGSC0003DMG400029473,PGSC0003DMG400019142,PGSC0003DMG400002564,PGSC0003DMG400003581,PGSC0003DMG400011479,PGSC0003DMG400014708,PGSC0003DMG400001981,PGSC0003DMG402002262,PGSC0003DMG400009035
GO:0008283	cell proliferation	biological_process	0.42802	1	5	2387	59	29181	PGSC0003DMG400025738,PGSC0003DMG400021407,PGSC0003DMG400016603,PGSC0003DMG400021406,PGSC0003DMG400013242
GO:0016679	oxidoreductase activity, acting on diphenols and related substances as donors	molecular_function	0.42858	1	12	2387	124	29181	PGSC0003DMG402029307,PGSC0003DMG400011772,PGSC0003DMG400005213,PGSC0003DMG400023569,PGSC0003DMG400019574,PGSC0003DMG400001123,PGSC0003DMG401020784,PGSC0003DMG400014025,PGSC0003DMG400001070,PGSC0003DMG400015579,PGSC0003DMG400018168,PGSC0003DMG402020784
GO:0030021	extracellular matrix structural constituent conferring compression resistance	molecular_function	0.42936	1	1	2387	8	29181	PGSC0003DMG400027964
GO:0030345	structural constituent of tooth enamel	molecular_function	0.42936	1	1	2387	8	29181	PGSC0003DMG400027964
GO:1901617	organic hydroxy compound biosynthetic process	biological_process	0.43038	1	4	2387	40	29181	PGSC0003DMG400027916,PGSC0003DMG400006483,PGSC0003DMG400019717,PGSC0003DMG400000112
GO:0055076	transition metal ion homeostasis	biological_process	0.4311	1	4	2387	41	29181	PGSC0003DMG400028320,PGSC0003DMG400006102,PGSC0003DMG400027119,PGSC0003DMG400024986
GO:0046849	bone remodeling	biological_process	0.43117	1	1	2387	7	29181	PGSC0003DMG400024437
GO:0048771	tissue remodeling	biological_process	0.43117	1	1	2387	7	29181	PGSC0003DMG400024437
GO:0005516	calmodulin binding	molecular_function	0.43128	1	9	2387	88	29181	PGSC0003DMG400014589,PGSC0003DMG400022413,PGSC0003DMG400032509,PGSC0003DMG400021421,Novel02268,PGSC0003DMG400029280,PGSC0003DMG400012696,PGSC0003DMG400013022,PGSC0003DMG400019135
GO:0015267	channel activity	molecular_function	0.43197	1	40	2387	439	29181	PGSC0003DMG400008840,PGSC0003DMG400008839,PGSC0003DMG402007138,PGSC0003DMG400012528,PGSC0003DMG400009914,PGSC0003DMG400018811,PGSC0003DMG400018133,PGSC0003DMG403002548,PGSC0003DMG400024266,PGSC0003DMG400026518,PGSC0003DMG400011330,PGSC0003DMG400005828,PGSC0003DMG400020215,PGSC0003DMG400003618,PGSC0003DMG401024472,PGSC0003DMG400006975,Novel02920,PGSC0003DMG400021862,PGSC0003DMG400023799,Novel02258…
GO:0022803	passive transmembrane transporter activity	molecular_function	0.43197	1	40	2387	439	29181	Novel03519,PGSC0003DMG400026534,PGSC0003DMG400008367,PGSC0003DMG400009085,PGSC0003DMG400005154,PGSC0003DMG400006327,PGSC0003DMG401029997,PGSC0003DMG400003632,PGSC0003DMG400026428,PGSC0003DMG401031045,PGSC0003DMG400030758,PGSC0003DMG400010170,PGSC0003DMG400022186,PGSC0003DMG400027450,PGSC0003DMG400019544,PGSC0003DMG400007963,PGSC0003DMG402007034,PGSC0003DMG400007001,PGSC0003DMG400005638,Novel01525…
GO:0006906	vesicle fusion	biological_process	0.43219	1	1	2387	5	29181	PGSC0003DMG401011206
GO:0048280	vesicle fusion with Golgi apparatus	biological_process	0.43219	1	1	2387	5	29181	PGSC0003DMG401011206
GO:0090174	organelle membrane fusion	biological_process	0.43219	1	1	2387	5	29181	PGSC0003DMG401011206
GO:0033202	DNA helicase complex	cellular_component	0.43291	1	2	2387	15	29181	PGSC0003DMG400003069,PGSC0003DMG400002537
GO:0044242	cellular lipid catabolic process	biological_process	0.43293	1	3	2387	25	29181	PGSC0003DMG400020620,PGSC0003DMG400027002,PGSC0003DMG400027192
GO:0032774	RNA biosynthetic process	biological_process	0.43389	1	374	2387	4382	29181	PGSC0003DMG400020825,PGSC0003DMG400022551,PGSC0003DMG400020541,PGSC0003DMG400017485,PGSC0003DMG400004191,PGSC0003DMG400016019,PGSC0003DMG400018234,PGSC0003DMG400027167,PGSC0003DMG400020086,PGSC0003DMG400007236,PGSC0003DMG400001960,Novel01529,PGSC0003DMG400018236,PGSC0003DMG400011824,PGSC0003DMG400009353,PGSC0003DMG400018389,PGSC0003DMG400004149,PGSC0003DMG400010897,PGSC0003DMG400001544,PGSC0003DM…
GO:0043604	amide biosynthetic process	biological_process	0.43432	1	140	2387	1665	29181	PGSC0003DMG400025847,PGSC0003DMG400024915,PGSC0003DMG400001398,PGSC0003DMG400010041,PGSC0003DMG400015392,PGSC0003DMG400010338,PGSC0003DMG400011645,PGSC0003DMG400018157,PGSC0003DMG400013126,Novel02246,PGSC0003DMG402005733,PGSC0003DMG400021405,PGSC0003DMG400016697,PGSC0003DMG400032166,PGSC0003DMG400013962,PGSC0003DMG400003811,PGSC0003DMG400025475,PGSC0003DMG400025519,PGSC0003DMG400019475,PGSC0003DM…
GO:0010605	negative regulation of macromolecule metabolic process	biological_process	0.43505	1	26	2387	277	29181	PGSC0003DMG400022027,PGSC0003DMG400019455,PGSC0003DMG402027248,PGSC0003DMG401031045,PGSC0003DMG400024388,PGSC0003DMG402010657,PGSC0003DMG400018107,PGSC0003DMG400022209,PGSC0003DMG400019574,PGSC0003DMG402027860,PGSC0003DMG400022551,PGSC0003DMG400010438,PGSC0003DMG402000479,PGSC0003DMG400025847,PGSC0003DMG400020541,PGSC0003DMG400022061,PGSC0003DMG400023478,PGSC0003DMG400030985,PGSC0003DMG400008931,…
GO:1901681	sulfur compound binding	molecular_function	0.43557	1	10	2387	102	29181	PGSC0003DMG400024701,PGSC0003DMG400038451,PGSC0003DMG401003285,PGSC0003DMG400013309,PGSC0003DMG402011372,PGSC0003DMG400012193,PGSC0003DMG400016997,PGSC0003DMG400022312,PGSC0003DMG400030867,PGSC0003DMG400030837
GO:0044763	single-organism cellular process	biological_process	0.43585	1	846	2387	9739	29181	PGSC0003DMG400009847,PGSC0003DMG400025126,PGSC0003DMG400029046,PGSC0003DMG400023886,PGSC0003DMG400024236,PGSC0003DMG400019455,PGSC0003DMG400031026,Novel03229,PGSC0003DMG400026493,PGSC0003DMG402004066,PGSC0003DMG400008871,PGSC0003DMG400008393,PGSC0003DMG400011692,PGSC0003DMG401013333,PGSC0003DMG400024205,PGSC0003DMG400014918,PGSC0003DMG400008719,PGSC0003DMG400018116,Novel03161,Novel01143,PGSC0003D…
GO:0006720	isoprenoid metabolic process	biological_process	0.43604	1	15	2387	152	29181	PGSC0003DMG400029626,PGSC0003DMG400006854,PGSC0003DMG400006822,PGSC0003DMG400027854,PGSC0003DMG400022232,PGSC0003DMG400014873,PGSC0003DMG400004020,Novel01333,PGSC0003DMG400022214,Novel03299,PGSC0003DMG400004168,PGSC0003DMG400004844,PGSC0003DMG403026842,PGSC0003DMG400019257,PGSC0003DMG400001117
GO:0008299	isoprenoid biosynthetic process	biological_process	0.43604	1	15	2387	152	29181	PGSC0003DMG400014873,PGSC0003DMG400004020,PGSC0003DMG400022232,PGSC0003DMG400006822,PGSC0003DMG400027854,PGSC0003DMG400029626,PGSC0003DMG400006854,PGSC0003DMG400004844,PGSC0003DMG403026842,PGSC0003DMG400001117,PGSC0003DMG400019257,PGSC0003DMG400004168,Novel01333,Novel03299,PGSC0003DMG400022214
GO:0008455	alpha-1,6-mannosylglycoprotein 2-beta-N-acetylglucosaminyltransferase activity	molecular_function	0.43651	1	1	2387	5	29181	PGSC0003DMG400005828
GO:0017048	Rho GTPase binding	molecular_function	0.43661	1	2	2387	16	29181	PGSC0003DMG400009912,PGSC0003DMG400013949
GO:0015725	gluconate transport	biological_process	0.4382	1	1	2387	6	29181	PGSC0003DMG400009290
GO:0035429	gluconate transmembrane transport	biological_process	0.4382	1	1	2387	6	29181	PGSC0003DMG400009290
GO:0042162	telomeric DNA binding	molecular_function	0.43832	1	2	2387	18	29181	PGSC0003DMG400032573,PGSC0003DMG400018222
GO:0008882	[glutamate-ammonia-ligase] adenylyltransferase activity	molecular_function	0.43893	1	1	2387	7	29181	PGSC0003DMG400032166
GO:0006779	porphyrin-containing compound biosynthetic process	biological_process	0.43953	1	15	2387	159	29181	PGSC0003DMG402028252,PGSC0003DMG400018437,PGSC0003DMG400024752,PGSC0003DMG400014873,PGSC0003DMG402004821,PGSC0003DMG400030559,PGSC0003DMG400020422,PGSC0003DMG400014782,PGSC0003DMG400045083,PGSC0003DMG400011264,PGSC0003DMG400017572,PGSC0003DMG400028389,PGSC0003DMG400013638,PGSC0003DMG402020115,PGSC0003DMG400004542
GO:0090544	BAF-type complex	cellular_component	0.44196	1	2	2387	15	29181	PGSC0003DMG400006102,PGSC0003DMG400000663
GO:0090066	regulation of anatomical structure size	biological_process	0.44202	1	9	2387	93	29181	PGSC0003DMG400011222,PGSC0003DMG400014708,PGSC0003DMG400015194,PGSC0003DMG402011364,PGSC0003DMG402002262,PGSC0003DMG400019142,PGSC0003DMG400003581,PGSC0003DMG400026351,PGSC0003DMG402026306
GO:0045333	cellular respiration	biological_process	0.44285	1	27	2387	299	29181	PGSC0003DMG400003078,PGSC0003DMG400020422,PGSC0003DMG400009098,PGSC0003DMG401002858,PGSC0003DMG400029615,PGSC0003DMG402007138,PGSC0003DMG400000367,PGSC0003DMG400033566,PGSC0003DMG400016820,PGSC0003DMG400021546,PGSC0003DMG400027192,PGSC0003DMG400030714,PGSC0003DMG400020497,PGSC0003DMG400030843,PGSC0003DMG400013550,PGSC0003DMG400028578,PGSC0003DMG400035389,PGSC0003DMG400021248,PGSC0003DMG400024914,…
GO:0008235	metalloexopeptidase activity	molecular_function	0.44387	1	1	2387	7	29181	PGSC0003DMG400019348
GO:0019076	viral release from host cell	biological_process	0.44401	1	5	2387	52	29181	PGSC0003DMG400019544,PGSC0003DMG400005484,PGSC0003DMG400030758,PGSC0003DMG400026428,PGSC0003DMG400008367
GO:0000030	mannosyltransferase activity	molecular_function	0.44472	1	2	2387	18	29181	PGSC0003DMG400003073,PGSC0003DMG400011801
GO:0016070	RNA metabolic process	biological_process	0.44551	1	487	2387	5701	29181	PGSC0003DMG400001714,PGSC0003DMG400005466,PGSC0003DMG400031465,PGSC0003DMG400016714,PGSC0003DMG400011479,PGSC0003DMG400008149,PGSC0003DMG400027521,PGSC0003DMG402022215,PGSC0003DMG400030311,PGSC0003DMG400015447,PGSC0003DMG400030837,PGSC0003DMG400016203,PGSC0003DMG400019406,PGSC0003DMG400004869,PGSC0003DMG400025372,PGSC0003DMG400000602,PGSC0003DMG400016512,PGSC0003DMG400018261,PGSC0003DMG400020157,…
GO:0042623	ATPase activity, coupled	molecular_function	0.44656	1	37	2387	405	29181	PGSC0003DMG400020740,PGSC0003DMG400003906,PGSC0003DMG400012761,PGSC0003DMG402029631,PGSC0003DMG400005943,PGSC0003DMG400010691,PGSC0003DMG400022825,PGSC0003DMG400026493,PGSC0003DMG400004087,PGSC0003DMG400018222,PGSC0003DMG402014462,PGSC0003DMG402003606,Novel03074,PGSC0003DMG400012677,PGSC0003DMG400020172,PGSC0003DMG400018116,PGSC0003DMG400003078,PGSC0003DMG400022417,PGSC0003DMG400025610,Novel01891…
GO:1901606	alpha-amino acid catabolic process	biological_process	0.4471	1	5	2387	48	29181	PGSC0003DMG400017724,PGSC0003DMG400015330,PGSC0003DMG400020541,PGSC0003DMG402000914,Novel00393
GO:0006073	cellular glucan metabolic process	biological_process	0.44722	1	15	2387	160	29181	PGSC0003DMG400030684,PGSC0003DMG400021214,PGSC0003DMG400029503,PGSC0003DMG400029792,Novel02306,PGSC0003DMG400010897,PGSC0003DMG400001998,PGSC0003DMG400000932,PGSC0003DMG400004109,Novel01290,PGSC0003DMG400009941,PGSC0003DMG400000408,PGSC0003DMG402010181,PGSC0003DMG400019332,PGSC0003DMG400028981
GO:0044042	glucan metabolic process	biological_process	0.44722	1	15	2387	160	29181	PGSC0003DMG400019332,PGSC0003DMG400009941,Novel01290,PGSC0003DMG402010181,PGSC0003DMG400000408,PGSC0003DMG400028981,Novel02306,PGSC0003DMG400029792,PGSC0003DMG400030684,PGSC0003DMG400021214,PGSC0003DMG400029503,PGSC0003DMG400001998,PGSC0003DMG400010897,PGSC0003DMG400004109,PGSC0003DMG400000932
GO:0035821	modification of morphology or physiology of other organism	biological_process	0.44808	1	25	2387	267	29181	PGSC0003DMG400010897,PGSC0003DMG400020519,PGSC0003DMG400023943,PGSC0003DMG400035689,PGSC0003DMG400036779,PGSC0003DMG400008477,PGSC0003DMG400008545,PGSC0003DMG400017715,PGSC0003DMG400022860,PGSC0003DMG400006975,PGSC0003DMG400014263,Novel03212,PGSC0003DMG400009423,PGSC0003DMG400032198,PGSC0003DMG400029308,PGSC0003DMG400022345,PGSC0003DMG400012412,PGSC0003DMG400000209,PGSC0003DMG400012926,PGSC0003DM…
GO:0008942	nitrite reductase [NAD(P)H] activity	molecular_function	0.45012	1	1	2387	6	29181	PGSC0003DMG400000457
GO:0046857	oxidoreductase activity, acting on other nitrogenous compounds as donors, with NAD or NADP as acceptor	molecular_function	0.45012	1	1	2387	6	29181	PGSC0003DMG400000457
GO:0009617	response to bacterium	biological_process	0.45024	1	19	2387	215	29181	PGSC0003DMG400009931,PGSC0003DMG400012437,PGSC0003DMG400013857,PGSC0003DMG400000602,PGSC0003DMG400030115,PGSC0003DMG400018875,PGSC0003DMG400003661,PGSC0003DMG400008484,PGSC0003DMG400014836,PGSC0003DMG400013022,PGSC0003DMG400021083,PGSC0003DMG400031412,PGSC0003DMG400021421,PGSC0003DMG400019321,PGSC0003DMG400024926,PGSC0003DMG400004723,PGSC0003DMG400023881,PGSC0003DMG400015075,PGSC0003DMG400002452
GO:0042742	defense response to bacterium	biological_process	0.45024	1	19	2387	215	29181	PGSC0003DMG400008484,PGSC0003DMG400003661,PGSC0003DMG400018875,PGSC0003DMG400000602,PGSC0003DMG400030115,PGSC0003DMG400013857,PGSC0003DMG400012437,PGSC0003DMG400009931,PGSC0003DMG400015075,PGSC0003DMG400023881,PGSC0003DMG400002452,PGSC0003DMG400004723,PGSC0003DMG400024926,PGSC0003DMG400019321,PGSC0003DMG400021421,PGSC0003DMG400031412,PGSC0003DMG400021083,PGSC0003DMG400013022,PGSC0003DMG400014836
GO:0044550	secondary metabolite biosynthetic process	biological_process	0.45044	1	5	2387	51	29181	PGSC0003DMG400000881,PGSC0003DMG400029473,Novel01143,PGSC0003DMG400023886,PGSC0003DMG400001464
GO:0008073	ornithine decarboxylase inhibitor activity	molecular_function	0.45068	1	1	2387	9	29181	PGSC0003DMG400004241
GO:0042979	ornithine decarboxylase regulator activity	molecular_function	0.45068	1	1	2387	9	29181	PGSC0003DMG400004241
GO:0019211	phosphatase activator activity	molecular_function	0.45171	1	1	2387	7	29181	PGSC0003DMG400027449
GO:0009036	Type II site-specific deoxyribonuclease activity	molecular_function	0.45185	1	12	2387	131	29181	PGSC0003DMG400028229,PGSC0003DMG400021659,PGSC0003DMG400028560,PGSC0003DMG400014694,PGSC0003DMG400003653,PGSC0003DMG400010798,PGSC0003DMG400004312,PGSC0003DMG400004252,PGSC0003DMG400011045,PGSC0003DMG400019574,PGSC0003DMG400009016,PGSC0003DMG400030963
GO:0015666	restriction endodeoxyribonuclease activity	molecular_function	0.45185	1	12	2387	131	29181	PGSC0003DMG400030963,PGSC0003DMG400009016,PGSC0003DMG400019574,PGSC0003DMG400011045,PGSC0003DMG400004252,PGSC0003DMG400014694,PGSC0003DMG400028560,PGSC0003DMG400021659,PGSC0003DMG400028229,PGSC0003DMG400004312,PGSC0003DMG400010798,PGSC0003DMG400003653
GO:0019538	protein metabolic process	biological_process	0.45302	1	507	2387	5730	29181	PGSC0003DMG400000296,PGSC0003DMG400023525,PGSC0003DMG402012933,Novel01728,PGSC0003DMG402029918,PGSC0003DMG400008728,PGSC0003DMG400005216,PGSC0003DMG402008032,PGSC0003DMG400032791,PGSC0003DMG400004710,PGSC0003DMG400022216,PGSC0003DMG400015697,PGSC0003DMG400012447,PGSC0003DMG400010866,PGSC0003DMG400012523,Novel01438,PGSC0003DMG400012605,PGSC0003DMG400000588,PGSC0003DMG400020089,PGSC0003DMG400031849…
GO:0018580	nitronate monooxygenase activity	molecular_function	0.45306	1	2	2387	16	29181	PGSC0003DMG400006483,PGSC0003DMG400021248
GO:0010109	regulation of photosynthesis	biological_process	0.45324	1	3	2387	26	29181	PGSC0003DMG400016608,PGSC0003DMG400001896,PGSC0003DMG400012447
GO:0042548	regulation of photosynthesis, light reaction	biological_process	0.45324	1	3	2387	26	29181	PGSC0003DMG400016608,PGSC0003DMG400012447,PGSC0003DMG400001896
GO:0042549	photosystem II stabilization	biological_process	0.45324	1	3	2387	26	29181	PGSC0003DMG400016608,PGSC0003DMG400001896,PGSC0003DMG400012447
GO:0043467	regulation of generation of precursor metabolites and energy	biological_process	0.45324	1	3	2387	26	29181	PGSC0003DMG400016608,PGSC0003DMG400001896,PGSC0003DMG400012447
GO:0010383	cell wall polysaccharide metabolic process	biological_process	0.45351	1	1	2387	7	29181	PGSC0003DMG400040684
GO:0010410	hemicellulose metabolic process	biological_process	0.45351	1	1	2387	7	29181	PGSC0003DMG400040684
GO:0045491	xylan metabolic process	biological_process	0.45351	1	1	2387	7	29181	PGSC0003DMG400040684
GO:0045493	xylan catabolic process	biological_process	0.45351	1	1	2387	7	29181	PGSC0003DMG400040684
GO:0046559	alpha-glucuronidase activity	molecular_function	0.45351	1	1	2387	7	29181	PGSC0003DMG400040684
GO:0005869	dynactin complex	cellular_component	0.45378	1	1	2387	8	29181	PGSC0003DMG400027131
GO:0016708	oxidoreductase activity, acting on paired donors, with incorporation or reduction of molecular oxygen, NAD(P)H as one donor, and incorporation of two atoms of oxygen into one donor	molecular_function	0.45395	1	1	2387	6	29181	PGSC0003DMG400019888
GO:0045259	proton-transporting ATP synthase complex	cellular_component	0.45448	1	20	2387	234	29181	PGSC0003DMG400008065,PGSC0003DMG401027166,PGSC0003DMG402026306,PGSC0003DMG400009353,PGSC0003DMG400020484,PGSC0003DMG400026643,PGSC0003DMG400020740,PGSC0003DMG400022770,PGSC0003DMG400003906,PGSC0003DMG400028924,PGSC0003DMG400025519,PGSC0003DMG400014217,PGSC0003DMG400005256,PGSC0003DMG400021607,PGSC0003DMG402019176,Novel03007,PGSC0003DMG400022893,PGSC0003DMG400005926,PGSC0003DMG400013106,PGSC0003DM…
GO:0019201	nucleotide kinase activity	molecular_function	0.45562	1	10	2387	101	29181	PGSC0003DMG401000923,PGSC0003DMG400015506,PGSC0003DMG400016797,PGSC0003DMG400016207,PGSC0003DMG400019081,PGSC0003DMG400015492,PGSC0003DMG402029631,Novel01787,Novel02589,PGSC0003DMG400012417
[truncated: 2,172 more rows]

## Sheet: 12 h specific
Table S6 The GO enrichment of specific DEGs at different time after cut-wounding
[truncated: 1,760 more rows]

[truncated: 1 more sheets: 24 h specific]
