# Supplementary material for: A Genome-Wide View of the Transcriptome Dynamics of Fresh-Cut Potato Tubers
Source: Genes (Basel). 2023 Jan 10;14(1):181. doi: 10.3390/genes14010181 (PMC9859442; doi:10.3390/genes14010181)
Supplement: Supplementary file 1 [file genes-14-00181-s001.zip › Table S7. The information of antioxidant enzymes and enzymatic browning-related genes.xlsx]

## Sheet: Sheet1
		FPKM				X4h_readcount(X4hvsX0h)	X0h_readcount(X4hvsX0h)	log2FoldChange
	Gene_id	X2_0 h	X2_4 h	X2_12 h	X2_24 h			X2_4 h	X2_12 h	X2_24 h				X2_12 h	X2_24 h					X2_24 h									Gene_description
PAL	PGSC0003DMG401021564	1.28771	4.92133	6.96151	5.76868			1.4928						2.0031						1.8044									Phenylalanine ammonia-lyase [Source:PGSC_GENE%3BAcc:PGSC0003DMG401021564]
	Novel01736	6.16453	21.4679	17.0174	18.344			1.3592						1.0337						1.2144									PREDICTED: phenylalanine ammonia-lyase-like [Solanum tuberosum]
	PGSC0003DMG401021549	14.1259	161.367	251.903	242.808			3.0742						3.725						3.7438									Phenylalanine ammonia-lyase [Source:PGSC_GENE%3BAcc:PGSC0003DMG401021549]
	PGSC0003DMG400023458	1.91396	30.3115	74.9774	93.156			3.5457						4.8606						5.245									Phenylalanine ammonia-lyase [Source:PGSC_GENE%3BAcc:PGSC0003DMG400023458]
	PGSC0003DMG400031457	1.0081	9.56289	8.97019	7.18358			2.8031						2.7223						2.4742									Phenylalanine ammonia-lyase 1 [Source:PGSC_GENE%3BAcc:PGSC0003DMG400031457]
	PGSC0003DMG401021564	1.28771	4.92133	6.96151	5.76868			1.4928						2.0031						1.8044									Phenylalanine ammonia-lyase [Source:PGSC_GENE%3BAcc:PGSC0003DMG401021564]
	PGSC0003DMG400019386	0.232409	0.396749	0.778287	0.769292			0.3318						1.3128						1.3683									Phenylalanine ammonia-lyase [Source:PGSC_GENE%3BAcc:PGSC0003DMG400019386]
	PGSC0003DMG402021564	7.95048	46.5941	60.4502	76.5645			2.1115						2.4953						2.9092									Phenylalanine ammonia-lyase [Source:PGSC_GENE%3BAcc:PGSC0003DMG402021564]
	PGSC0003DMG402021549	56.7311	173.667	210.586	406.737			1.1748						1.4608						2.4838									Phenylalanine ammonia-lyase [Source:PGSC_GENE%3BAcc:PGSC0003DMG402021549]
	PGSC0003DMG400031365	15.5857	117.731	301.869	340.827			2.4777						3.8441						4.0909									Phenylalanine ammonia-lyase [Source:PGSC_GENE%3BAcc:PGSC0003DMG400031365]
	Novel01899	0.290943	2.74221	1.26654	0.999414			2.7934						1.6911						1.4209									PREDICTED: phenylalanine ammonia-lyase-like [Solanum tuberosum]
PPO	PGSC0003DMG400022430	0	0.0353017	0.057106	0.33498	3.78217	0	Inf	0.12091	0.18759	FALSE	6.77922	0	Inf	0.036614	0.061395	FALSE	38.0137	0	Inf	9.9947e-10	3.6542e-09	UP	2	+	34338339	34340696	3743	Polyphenoloxidase [Source:PGSC_GENE%3BAcc:PGSC0003DMG400022430]
	PGSC0003DMG400029576	3.26404	11.9542	14.7272	40.4202	1224.42	452.933	1.4347	0.00032492	0.00074335	UP	1671.08	499.213	1.7431	2.2028e-06	5.9111e-06	UP	4376.03	453.657	3.2699	4.2703e-07	1.2723e-06	UP	8	+	45676042	45677832	3582	Polyphenol oxidase [Source:PGSC_GENE%3BAcc:PGSC0003DMG400029576]
	PGSC0003DMG400018914	1.31812	27.8962	31.8983	53.4092	2838.54	181.831	3.9645	1.8883e-20	1.2417e-19	UP	3595.36	200.248	4.1663	8.5179e-36	9.802e-35	UP	5749.15	181.982	4.9815	5.2729e-37	7.3582e-36	UP	8	-	45888403	45890289	3558	Polyphenol oxidase [Source:PGSC_GENE%3BAcc:PGSC0003DMG400018914]
	PGSC0003DMG400018916	1.31808	30.9481	25.741	52.6046	3360.01	194.123	4.1134	5.241e-17	2.9197e-16	UP	3095.47	213.697	3.8565	5.5375e-141	8.0867e-139	UP	6042.47	194.225	4.9593	5.1701e-30	5.3883e-29	UP	8	-	45873235	45875234	3797	Polyphenol oxidase [Source:PGSC_GENE%3BAcc:PGSC0003DMG400018916]
	PGSC0003DMG400018917	0.0219021	0.137266	0.644764	4.43817	14.837	3.22838	2.2003	0.074947	0.12191	FALSE	77.1753	3.53459	4.4485	4.2659e-13	1.7766e-12	UP	508.503	3.21563	7.305	1.8132e-87	1.2465e-85	UP	8	-	45868847	45870834	3779	Polyphenol oxidase A%2C chloroplastic [Source:PGSC_GENE%3BAcc:PGSC0003DMG400018917]
	PGSC0003DMG400029575	9.18918	29.0623	141.238	419.296	3088.13	1323.71	1.2221	3.3316e-05	8.4446e-05	UP	16624.4	1458.37	3.5109	1.7025e-68	5.3942e-67	UP	47145.5	1327.89	5.1499	9.2103e-35	1.164e-33	UP	8	+	45630872	45632817	3716	Catechol oxidase B%2C chloroplastic [Source:PGSC_GENE%3BAcc:PGSC0003DMG400029575]
CAT	PGSC0003DMG400001570	3.71589	17.2766	41.321	40.8675	1640.05	478.556	1.777	0.00059086	0.0013148	UP	4345.37	526.922	3.0438	1.285e-52	2.5407e-51	UP	4113.15	480.033	3.099	4.7759e-55	1.3114e-53	UP	2	-	38567863	38572211	3320	Catalase isozyme 2 [Source:PGSC_GENE%3BAcc:PGSC0003DMG400001570]
	PGSC0003DMG400009906	6.64669	2.70341	3.71093	5.03267	267.91	895.126	-1.7403	1.237e-05	3.2682e-05	DOWN	407.263	984.011	-1.2727	0.00053543	0.0011479	DOWN	529.331	896.748	-0.76053	0.024856	0.043195	DOWN	4	+	71630147	71636022	3466	Catalase isozyme 3 [Source:PGSC_GENE%3BAcc:PGSC0003DMG400009906]
	PGSC0003DMG400009908	1.14616	0.22209	0.143894	0.160335	18.1801	127.46	-2.8096	2.5676e-14	1.2395e-13	DOWN	13.0572	140.2	-3.4246	5.5841e-19	3.1506e-18	DOWN	13.9224	127.69	-3.1972	2.9979e-16	1.6644e-15	DOWN	4	+	71640582	71643253	2864	Gene of unknown function [Source:PGSC_GENE%3BAcc:PGSC0003DMG400009908]
	PGSC0003DMG400029408	1082.86	373.869	699.848	1514.61	34362.1	135179	-1.976	1.4732e-46	2.8092e-45	DOWN	71260.1	148694	-1.0612	3.6184e-19	2.0593e-18	DOWN	147567	135443	0.12368	0.4225	0.54816	FALSE	12	+	57454332	57458059	3215	Catalase [Source:PGSC_GENE%3BAcc:PGSC0003DMG400029408]
SOD	Novel01435	0.0920313	0.126465	0.0611032	0.0718476	4.00792	3.9573	0.018335	1	1	FALSE	2.1426	4.351	-1.022	0.58995	0.71731	FALSE	2.41638	3.96086	-0.71297	0.69776	0.81463	FALSE	2	+	13241661	13244851	2218	PREDICTED: superoxide dismutase [Fe], chloroplastic isoform X1 [Solanum tuberosum]
	PGSC0003DMG400005247	3.39416	5.94128	9.49094	7.90794	395.108	306.484	0.36644	0.044706	0.076332	FALSE	699.129	337.194	1.052	7.469e-10	2.5541e-09	UP	557.469	307.14	0.86	5.7594e-06	1.554e-05	UP	3	-	36657156	36660903	2900	Superoxide dismutase [Source:PGSC_GENE%3BAcc:PGSC0003DMG400005247]
	PGSC0003DMG400016647	73.9627	45.8426	67.1625	93.3094	2423.19	5309.82	-1.1318	1.2756e-20	8.4557e-20	DOWN	3932.97	5840.61	-0.5705	3.2338e-06	8.5578e-06	DOWN	5226.54	5317.28	-0.024833	0.85845	0.95098	FALSE	6	-	33726748	33729774	1849	Superoxide dismutase [Mn]%2C mitochondrial [Source:PGSC_GENE%3BAcc:PGSC0003DMG400016647]
	PGSC0003DMG400027577	50.4352	20.1418	22.4198	18.9071	1261.08	4287.02	-1.7653	4.7702e-39	6.8899e-38	DOWN	1554.86	4717.21	-1.6011	6.946e-30	6.3357e-29	DOWN	1256.2	4294.5	-1.7734	1.0771e-25	9.3562e-25	DOWN	6	-	35297776	35306389	2320	Superoxide dismutase [Source:PGSC_GENE%3BAcc:PGSC0003DMG400027577]
Rboh	Novel02721	4.16423	18.2957	15.3184	27.4082			1.694						1.4483						2.3585									RecName: Full=Respiratory burst oxidase homolog protein D; AltName: Full=NADPH oxidase RBOHD; AltName: Full=StRBOHD>gi|146219365|dbj|BAE79345.2| NADPH oxidase [Solanum tuberosum]
	PGSC0003DMG400012316	0.164366	2.59671	5.94202	10.4923			3.542						4.7442						5.6356									Respiratory burst oxidase homolog protein A [Source:PGSC_GENE%3BAcc:PGSC0003DMG400012316]
	PGSC0003DMG400014168	7.30743	51.1684	26.516	20.7833			2.3661						1.428						1.1477									Respiratory burst oxidase homolog protein C [Source:PGSC_GENE%3BAcc:PGSC0003DMG400014168]
	PGSC0003DMG400024754	0.020989	1.13166	1.93166	0.803195			5.311						6.0923						4.9038									Respiratory burst oxidase homolog protein B [Source:PGSC_GENE%3BAcc:PGSC0003DMG400024754]
	PGSC0003DMG400013550	0.144263	0.619496	0.158641	0.373933			1.6621						-0.29467						1.0177									Respiratory burst oxidase [Source:PGSC_GENE%3BAcc:PGSC0003DMG400013550]
	Novel02552	0.389918	1.3342	3.79804	1.25943			1.3346						2.8524						1.331									PREDICTED: respiratory burst oxidase homolog protein E-like [Solanum tuberosum]
	Novel03252	0.41813	2.99451	7.645	12.5055			2.4019						3.7605						4.5398									NADPH oxidase [Solanum lycopersicum]>gi|4585142|gb|AAD25300.1|AF088276_1 NADPH oxidase [Solanum lycopersicum]
POD	PGSC0003DMG400014055	9.44516	252.06	324.33	293.688	15473.8	786.128	4.2989	1.0446e-151	3.2107e-149	UP	22048.5	865.905	4.6703	2.9669e-65	8.5098e-64	UP	19096.1	787.211	4.6004	9.8645e-183	6.0744e-180	UP	6	+	31519292	31521502	2147	Peroxidase [Source:PGSC_GENE%3BAcc:PGSC0003DMG400014055]
	PGSC0003DMG402025083	2.26024	13.4567	24.4055	72.238	932.875	212.444	2.1346	2.0891e-12	9.0491e-12	UP	1873.15	234.006	3.0009	6.0874e-20	3.5953e-19	UP	5308.71	213.161	4.6383	1.5702e-82	9.6279e-81	UP	4	+	61099775	61103157	2424	Peroxidase [Source:PGSC_GENE%3BAcc:PGSC0003DMG402025083]
	PGSC0003DMG400020437	0.460272	0.120822	0.109133	0.0795992	5.08127	26.321	-2.373	0.0014506	0.0030893	DOWN	5.09202	28.9384	-2.5067	0.00055099	0.0011789	DOWN	3.53419	26.366	-2.8992	0.00026978	0.00061284	DOWN	7	+	50315300	50317063	1579	Peroxidase [Source:PGSC_GENE%3BAcc:PGSC0003DMG400020437]
	PGSC0003DMG402015497	0.126571	0.010079	0.0189908	0.00954817	0.605054	10.3341	-4.0942	0.0073293	0.014266	DOWN	1.26222	11.3565	-3.1695	0.019117	0.033548	DOWN	0.608094	10.3342	-4.087	0.0069081	0.013125	DOWN	2	-	20759653	20761382	2101	Pericarp peroxidase 3 [Source:PGSC_GENE%3BAcc:PGSC0003DMG402015497]
	PGSC0003DMG400024253	1.24815	0.82484	0.230343	0.198211	73.5901	151.239	-1.0393	0.00020738	0.00048402	DOWN	22.7677	166.376	-2.8694	2.8807e-17	1.5026e-16	DOWN	18.7349	151.522	-3.0157	2.9734e-17	1.7315e-16	DOWN	3	-	41650077	41652515	3121	Peroxidase 66 [Source:PGSC_GENE%3BAcc:PGSC0003DMG400024253]
	PGSC0003DMG400024967	1.80351	12.5997	14.2011	51.2157	670.348	130.181	2.3644	1.3946e-36	1.8128e-35	UP	837.521	143.367	2.5464	0.00011875	0.00027178	UP	2886	130.699	4.4648	3.2291e-134	6.8719e-132	UP	2	-	43038161	43040566	2366	Peroxidase [Source:PGSC_GENE%3BAcc:PGSC0003DMG400024967]
	PGSC0003DMG400010465	0.00534631	0.872963	1.7327	0.252371	52.3477	0.433317	6.9166	1.9684e-05	5.1061e-05	UP	115.009	0.478286	7.9097	8.7965e-20	5.1583e-19	UP	16.1181	0.433368	5.2169	0.015752	0.028312	UP	10	-	54851708	54854963	2314	Peroxidase [Source:PGSC_GENE%3BAcc:PGSC0003DMG400010465]
	PGSC0003DMG400022341	0.57753	12.7678	3.70659	1.26901	853.785	52.3847	4.0267	1.1426e-16	6.239e-16	UP	274.546	57.6577	2.2515	4.3872e-10	1.5247e-09	UP	89.9656	52.4248	0.77912	0.019413	0.034368	UP	2	-	35183497	35186539	2338	Suberization-associated anionic peroxidase 2 [Source:PGSC_GENE%3BAcc:PGSC0003DMG400022341]
	PGSC0003DMG400000511	3.31063	14.4151	16.5987	32.2712	778.971	242.815	1.6817	1.0293e-23	7.8627e-23	UP	993.676	267.216	1.8948	1.2395e-20	7.5758e-20	UP	1846.78	243.195	2.9248	4.145e-43	7.4144e-42	UP	2	-	46773348	46777532	2412	Class III peroxidase [Source:PGSC_GENE%3BAcc:PGSC0003DMG400000511]
	PGSC0003DMG400022342	0.963299	2.64631	9.14737	62.3452	183.773	90.7559	1.0179	4.659e-05	0.00011626	UP	703.833	99.9249	2.8163	3.0836e-20	1.8439e-19	UP	4584.35	90.9346	5.6557	7.1473e-141	1.7383e-138	UP	2	-	35169031	35172256	2429	Suberization-associated anionic peroxidase [Source:PGSC_GENE%3BAcc:PGSC0003DMG400022342]
	PGSC0003DMG400032199	0.0696509	1.32529	0.738416	1.41505	83.7651	5.97849	3.8085	2.1648e-13	9.945e-13	UP	51.6905	6.57647	2.9745	2.081e-06	5.5979e-06	UP	94.1944	6.00507	3.9714	0.021952	0.038494	UP	1	-	1761454	1764298	2210	Peroxidase [Source:PGSC_GENE%3BAcc:PGSC0003DMG400032199]
	PGSC0003DMG400025084	0.541088	12.3486	3.93653	5.64555	561.274	33.3769	4.0718	9.2567e-68	3.3835e-66	UP	198.169	36.7397	2.4313	7.9501e-16	3.8272e-15	UP	272.45	33.4251	3.027	1.1757e-06	3.3624e-06	UP	4	+	61081697	61083354	1590	Peroxidase 4 [Source:PGSC_GENE%3BAcc:PGSC0003DMG400025084]
	Novel01675	0.802484	3.24047	23.7435	71.0889	100.714	33.8676	1.5723	1.5223e-05	3.9914e-05	UP	817.563	37.2544	4.4558	9.2896e-44	1.411e-42	UP	2338.17	33.918	6.1072	5.8846e-56	1.6551e-54	UP	2	-	40028925	40061057	1318	PREDICTED: peroxidase 49-like [Solanum tuberosum]
	PGSC0003DMG400016223	6.71054	4.51254	4.52404	5.41986	273.388	552.1	-1.014	9.7152e-09	3.3142e-08	DOWN	303.589	607.294	-1.0003	1.4703e-08	4.634e-08	DOWN	348.322	552.897	-0.66659	0.00026323	0.00059888	DOWN	11	-	2724732	2727117	2119	Peroxidase 17 [Source:PGSC_GENE%3BAcc:PGSC0003DMG400016223]
	PGSC0003DMG400014867	1.15163	24.354	73.4925	191.384	1627.99	104.392	3.963	9.4864e-122	1.3977e-119	UP	5443.72	114.974	5.5652	2.3408e-29	2.0842e-28	UP	13539.4	104.553	7.0168	4.3055e-71	1.926e-69	UP	3	-	7132680	7135798	2338	Peroxidase [Source:PGSC_GENE%3BAcc:PGSC0003DMG400014867]
	PGSC0003DMG400011640	6.57946	277.028	215.065	106.587	17583.8	566.309	4.9565	1.3296e-212	1.3106e-209	UP	15122	623.653	4.5998	9.6484e-245	9.5715e-242	UP	7157.26	566.672	3.6588	2.0002e-14	1.0029e-13	UP	5	-	47534530	47537782	2220	Peroxidase [Source:PGSC_GENE%3BAcc:PGSC0003DMG400011640]
	Novel00377	0.11465	7.18023	0.407856	0.194727	245.193	5.30735	5.5298	2.2058e-30	2.243e-29	UP	15.4105	5.84659	1.3982	0.10935	0.16688	FALSE	7.04091	5.32438	0.40315	0.71675	0.83283	FALSE	1	+	81614959	81617064	1194	PREDICTED: peroxidase 43-like [Solanum tuberosum]
	PGSC0003DMG400015548	0.021096	0.513579	2.06493	4.27168	30.9158	1.72567	4.1631	0.00043621	0.00098567	UP	137.654	1.89737	6.1809	5.5519e-28	4.6744e-27	UP	272.054	1.73334	7.2942	1.8007e-31	1.9914e-30	UP	11	-	45091849	45093280	2105	Peroxidase 15 [Source:PGSC_GENE%3BAcc:PGSC0003DMG400015548]
	PGSC0003DMG401025083	5.31884	130.931	43.4778	30.48	6607.23	364.392	4.1805	2.9504e-195	2.0079e-192	UP	2430.63	400.898	2.6	1.151e-32	1.1759e-31	UP	1628.73	364.734	2.1588	6.3917e-24	5.15e-23	UP	4	+	61089724	61091577	2324	Peroxidase 12 [Source:PGSC_GENE%3BAcc:PGSC0003DMG401025083]
	PGSC0003DMG400012589	0.127177	3.03743	2.53732	0.240484	192.854	10.9479	4.1388	1.0633e-30	1.0961e-29	UP	178.633	12.06	3.8887	0.00031349	0.0006874	UP	16.1501	10.9563	0.55978	0.40542	0.52963	FALSE	1	+	81814018	81815680	2221	Cationic peroxidase [Source:PGSC_GENE%3BAcc:PGSC0003DMG400012589]
	PGSC0003DMG400030430	0.586427	0.00479949	0.0762334	0.237366	0.281446	46.6487	-7.3728	1.5466e-13	7.1617e-13	DOWN	4.94505	51.319	-3.3754	7.4809e-08	2.2461e-07	DOWN	14.8035	46.7316	-1.6585	0.0013226	0.0027593	DOWN	6	-	56939869	56941213	2049	Anionic peroxidase swpa7 [Source:PGSC_GENE%3BAcc:PGSC0003DMG400030430]
	PGSC0003DMG400024285	0.0522966	1.21876	0.0962232	0.109894	62.687	3.65426	4.1005	2.307e-11	9.3818e-11	UP	5.48737	4.01715	0.44994	0.85541	0.94767	FALSE	5.98709	3.65086	0.71362	0.61383	0.73959	FALSE	9	-	50464112	50466033	2159	Peroxidase 44 [Source:PGSC_GENE%3BAcc:PGSC0003DMG400024285]
	PGSC0003DMG401029332	0.0203171	1.48436	0.547691	0.161358	89.8609	1.67557	5.745	4.7707e-20	3.0803e-19	UP	36.709	1.83664	4.321	6.4566e-07	1.8057e-06	UP	10.3362	1.66993	2.6299	0.054467	0.089046	FALSE	12	-	57165118	57166947	2117	Peroxidase [Source:PGSC_GENE%3BAcc:PGSC0003DMG401029332]
	PGSC0003DMG400003654	0.845312	0.0686281	0.0480241	0.0858857	3.61991	60.5977	-4.0652	0.0028387	0.0058346	DOWN	2.81313	66.6973	-4.5674	0.0014699	0.0029977	DOWN	4.82476	60.5909	-3.6506	0.0050178	0.0097316	DOWN	2	+	39070255	39074938	2169	Peroxidase [Source:PGSC_GENE%3BAcc:PGSC0003DMG400003654]
	PGSC0003DMG400015801	0.0305846	0.878509	1.89435	0.212847	62.9932	2.96808	4.4076	1.1816e-12	5.1995e-12	UP	150.601	3.27578	5.5228	2.5935e-14	1.1534e-13	UP	16.1061	2.9719	2.4381	0.035488	0.060015	FALSE	3	-	43497338	43500116	2509	Bacterial-induced peroxidase [Source:PGSC_GENE%3BAcc:PGSC0003DMG400015801]
	PGSC0003DMG400013654	0.0282543	0.431421	0.228764	0.0420481	27.8667	2.46963	3.4962	0.0058548	0.011531	UP	16.3512	2.72527	2.5849	0.011118	0.02019	UP	2.87811	2.47685	0.21662	0.89229	0.9746	FALSE	2	-	37854370	37856703	2259	Peroxidase 7 [Source:PGSC_GENE%3BAcc:PGSC0003DMG400013654]
	PGSC0003DMG400020494	0.00497269	0.334823	0.395625	0.202239	15.3082	0.310563	5.6233	0.000345	0.00078778	UP	20.036	0.33959	5.8827	5.1737e-05	0.00012267	UP	9.79801	0.30914	4.9862	0.008538	0.016002	UP	8	+	1070402	1071714	2273	Peroxidase 65 [Source:PGSC_GENE%3BAcc:PGSC0003DMG400020494]
	PGSC0003DMG400032147	1.66606	78.6381	29.5116	15.2928	4612.18	132.581	5.1205	4.5144e-42	7.2494e-41	UP	1917.6	145.909	3.7162	9.8767e-21	6.0688e-20	UP	948.415	132.635	2.8381	1.4613e-09	5.2821e-09	UP	1	+	1754443	1757775	2051	Peroxidase [Source:PGSC_GENE%3BAcc:PGSC0003DMG400032147]
	PGSC0003DMG400016453	42.6747	2.90101	14.6222	148.48	186.186	3715.1	-4.3186	3.7328e-11	1.499e-10	DOWN	1039.43	4091.73	-1.9769	0.0001834	0.00041204	DOWN	10102.3	3726.05	1.439	9.6183e-06	2.5422e-05	UP	2	-	36328893	36330526	2245	Secretory peroxidase [Source:PGSC_GENE%3BAcc:PGSC0003DMG400016453]
	PGSC0003DMG400020252	3.05215	14.0966	8.54198	11.388	864.879	254.31	1.7659	3.0582e-26	2.6322e-25	UP	580.398	279.737	1.053	2.0284e-06	5.4589e-06	UP	739.628	254.695	1.538	3.8363e-10	1.4467e-09	UP	2	+	48001588	48003316	2333	Peroxidase 55 [Source:PGSC_GENE%3BAcc:PGSC0003DMG400020252]
	PGSC0003DMG400026575	0.0881741	0.389741	14.2232	16.8031	20.3981	6.2392	1.709	0.14795	0.22438	FALSE	824.181	6.8854	6.9033	9.0051e-30	8.1674e-29	UP	928.264	6.2538	7.2137	4.8845e-12	2.1037e-11	UP	9	+	13125835	13128476	2180	Class III peroxidase [Source:PGSC_GENE%3BAcc:PGSC0003DMG400026575]
	PGSC0003DMG400011458	7.605	5.30508	3.95048	3.53734	331.274	644.797	-0.96082	1.2199e-08	4.1286e-08	DOWN	273.291	709.378	-1.3761	1.7271e-15	8.1829e-15	DOWN	234.166	646.019	-1.464	1.4825e-14	7.5105e-14	DOWN	1	+	47291095	47300139	2494	Peroxidase 40 [Source:PGSC_GENE%3BAcc:PGSC0003DMG400011458]
	Novel01676	0.109926	0.670845	6.17186	17.3328	18.3287	4.07254	2.1701	0.016022	0.029654	UP	186.725	4.48395	5.38	4.1994e-25	3.1355e-24	UP	500.46	4.08596	6.9364	4.4524e-22	3.2492e-21	UP	2	-	40053139	40060067	1086	PREDICTED: peroxidase 49-like [Solanum tuberosum]
	PGSC0003DMG402015792	9.80378	6.48178	70.6503	75.0527	610.105	1252.21	-1.0373	0.011154	0.021096	DOWN	7366.17	1378.21	2.4181	4.2305e-80	1.8111e-78	UP	7485.21	1253.71	2.5778	2.5347e-67	9.9675e-66	UP	3	+	43492819	43498769	3292	Short-chain dehydrogenase [Source:PGSC_GENE%3BAcc:PGSC0003DMG402015792]
	PGSC0003DMG400025492	0.769833	1.95333	3.24073	6.67342	123.844	66.2553	0.90242	0.0021419	0.0044734	UP	227.705	72.9189	1.6428	1.4597e-05	3.636e-05	UP	447.746	66.3542	2.7544	1.5416e-14	7.7976e-14	UP	7	+	47159149	47160776	2218	Peroxidase [Source:PGSC_GENE%3BAcc:PGSC0003DMG400025492]
	Novel02497	0.32477	0.378099	2.65375	8.11174	11.3862	13.2721	-0.22112	0.86002	0.96083	FALSE	88.4767	14.6193	2.5974	0.04196	0.069585	FALSE	258.378	13.3105	4.2788	2.003e-06	5.6174e-06	UP	5	-	1393029	1396795	1194	PREDICTED: peroxidase 11 [Solanum lycopersicum]
	PGSC0003DMG400005062	1.99606	3.49797	9.90466	65.0524	228.743	176.998	0.36999	0.15886	0.23913	FALSE	717.361	194.969	1.8795	3.3391e-26	2.6182e-25	UP	4506.37	177.56	4.6656	5.7008e-158	1.9642e-155	UP	3	-	2281928	2284960	2287	Peroxidase [Source:PGSC_GENE%3BAcc:PGSC0003DMG400005062]
	PGSC0003DMG400001774	0.0791098	0.686475	1.41497	10.8715	42.6424	6.6574	2.6793	1.1451e-05	3.0352e-05	UP	97.4179	7.34217	3.7299	1.2212e-12	4.9645e-12	UP	714.039	6.6879	6.7383	4.3319e-18	2.6196e-17	UP	9	+	6293810	6297501	2370	Peroxidase [Source:PGSC_GENE%3BAcc:PGSC0003DMG400001774]
	PGSC0003DMG400003654	0.845312	0.0686281	0.0480241	0.0858857	3.61991	60.5977	-4.0652	0.0028387	0.0058346	DOWN	2.81313	66.6973	-4.5674	0.0014699	0.0029977	DOWN	4.82476	60.5909	-3.6506	0.0050178	0.0097316	DOWN	2	+	39070255	39074938	2169	Peroxidase [Source:PGSC_GENE%3BAcc:PGSC0003DMG400003654]
	PGSC0003DMG400004090	0	0.0997865	0.0637002	2.38163	6.21903	0	Inf	0.025557	0.045727	UP	4.39972	0	Inf	0.10446	0.16027	FALSE	157.369	0	Inf	2.7925e-40	4.4951e-39	UP	7	-	10927140	10929269	2180	Peroxidase [Source:PGSC_GENE%3BAcc:PGSC0003DMG400004090]
	PGSC0003DMG400025803	0	0	0.00394682	0.346125	0	0	NA	NA	NA	NA	0.256232	0	Inf	1	1	FALSE	21.4653	0	Inf	8.5052e-06	2.2604e-05	UP	1	+	84743550	84745137	2050	Peroxidase 10 [Source:PGSC_GENE%3BAcc:PGSC0003DMG400025803]
	PGSC0003DMG402015792	9.80378	6.48178	70.6503	75.0527	610.105	1252.21	-1.0373	0.011154	0.021096	DOWN	7366.17	1378.21	2.4181	4.2305e-80	1.8111e-78	UP	7485.21	1253.71	2.5778	2.5347e-67	9.9675e-66	UP	3	+	43492819	43498769	3292	Short-chain dehydrogenase [Source:PGSC_GENE%3BAcc:PGSC0003DMG402015792]
	PGSC0003DMG402023885	0.748918	0.566618	0.389307	0.259754	27.2239	48.8502	-0.84349	0.069004	0.11318	FALSE	20.7198	53.7396	-1.375	0.0042674	0.0082054	DOWN	13.2802	48.9616	-1.8824	0.00027358	0.00062126	DOWN	2	+	19853950	19855458	1680	Gene of unknown function [Source:PGSC_GENE%3BAcc:PGSC0003DMG402023885]
