# Supplementary material for: A Genome-Wide View of the Transcriptome Dynamics of Fresh-Cut Potato Tubers
Source: Genes (Basel). 2023 Jan 10;14(1):181. doi: 10.3390/genes14010181 (PMC9859442; doi:10.3390/genes14010181)
Supplement: Supplementary file 1 [file genes-14-00181-s001.zip › Table S8. The information of genes with Log2FC more than 6.xlsx]

## Sheet: Log2FC_6_information
Gene_id	Gene_description	X0h_group_fpkm	X4h_group_fpkm	X12h_group_fpkm	X24h_group_fpkm	D0h_group_fpkm	D4h_group_fpkm	D12h_group_fpkm	D24h_group_fpkm	D12h_readcount(D12hvsD0h)	D0h_readcount(D12hvsD0h)	log2FoldChange(D12hvsD0h)	pval(D12hvsD0h)	padj(D12hvsD0h)	significant(D12hvsD0h)	D24h_readcount(D24hvsD0h)	D0h_readcount(D24hvsD0h)	log2FoldChange(D24hvsD0h)	pval(D24hvsD0h)	padj(D24hvsD0h)	significant(D24hvsD0h)	D4h_readcount(D4hvsD0h)	D0h_readcount(D4hvsD0h)	log2FoldChange(D4hvsD0h)	pval(D4hvsD0h)	padj(D4hvsD0h)	significant(D4hvsD0h)	X12h_readcount(X12hvsX0h)	X0h_readcount(X12hvsX0h)	log2FoldChange(X4hvsX0h)	log2FoldChange(X12hvsX0h)	pval(X12hvsX0h)	padj(X12hvsX0h)	significant(X12hvsX0h)	X24h_readcount(X24hvsX0h)	X0h_readcount(X24hvsX0h)	log2FoldChange(X24hvsX0h)	pval(X24hvsX0h)	padj(X24hvsX0h)	significant(X24hvsX0h)	X4h_readcount(X4hvsX0h)	X0h_readcount(X4hvsX0h)		pval(X4hvsX0h)	padj(X4hvsX0h)	significant(X4hvsX0h)
PGSC0003DMG400010357	Phloem protein 2 [Source:PGSC_GENE%3BAcc:PGSC0003DMG400010357]	0.187084	22.7988	2.16667	0.749103	0.0273106	19.2018	0.200661	0.233611	7.41464	1.20868	2.617	0.57048	0.87789	FALSE	8.84573	1.2391	2.8357	0.43703	0.7805	FALSE	612.818	1.02344	9.2259	3.97e-07	8.22e-05	UP	84.8354	9.87376	6.4903	3.103	1.21e-10	4.37e-10	UP	27.9861	8.97624	1.6405	0.026429	0.045668	UP	805.696	8.96169		6.47e-133	1.28e-130	UP
PGSC0003DMG400016892	Conserved gene of unknown function [Source:PGSC_GENE%3BAcc:PGSC0003DMG400016892]	0.0521895	9.57128	1.51169	0.358381	0.127141	0.890866	0.580486	0.0792692	27.5517	7.25205	1.9257	0.42018	0.76505	FALSE	3.91196	7.4346	-0.92637	0.53217	0.85101	FALSE	36.9728	6.14064	2.59	0.23632	0.60494	FALSE	76.313	3.54889	7.0803	4.4265	6.89e-08	2.08e-07	UP	17.2487	3.21849	2.422	0.045644	0.075739	FALSE	435.879	3.22103		4.04e-89	2.65e-87	UP
PGSC0003DMG400003518	Conserved gene of unknown function [Source:PGSC_GENE%3BAcc:PGSC0003DMG400003518]	0.0870349	9.36943	3.37361	1.34364	0.493027	9.84581	2.26903	0.965328	69.5338	18.1301	1.9393	0.26843	0.63849	FALSE	30.418	18.5865	0.71067	0.76378	0.98303	FALSE	262.896	15.3516	4.098	0.0058889	0.074391	FALSE	109.796	3.81626	6.3103	4.8465	6.62e-07	1.85e-06	UP	41.7636	3.46595	3.5909	2.76e-07	8.36e-07	UP	275.093	3.46645		1.54e-57	4.16e-56	UP
PGSC0003DMG400008950	Calmodulin binding protein [Source:PGSC_GENE%3BAcc:PGSC0003DMG400008950]	0.0599821	6.09216	1.38726	0.822236	0	3.86475	0.575395	0.384309	22.2809	0	Inf	0.080303	0.34975	FALSE	15.337	0	Inf	0.10801	0.39801	FALSE	129.547	0	Inf	0.00043403	0.013142	UP	57.0902	3.32795	6.2212	4.1005	2.01e-09	6.69e-09	UP	32.2828	3.03158	3.4126	2.23e-05	5.69e-05	UP	226.288	3.03305		1.43e-47	2.81e-46	UP
PGSC0003DMG400012655	Conserved gene of unknown function [Source:PGSC_GENE%3BAcc:PGSC0003DMG400012655]	0.0599898	5.22272	0.391245	0.355192	0.022655	0.366543	0.171681	0.0710325	7.67903	1.20868	2.6675	0.55269	0.86639	FALSE	3.27826	1.2391	1.4036	0.97943	1	FALSE	14.0666	1.02344	3.7808	0.26098	0.63932	FALSE	18.4739	3.81626	6.0044	2.2753	0.017331	0.03063	UP	16.0538	3.46595	2.2116	0.021896	0.0384	UP	222.525	3.46645		8.93e-47	1.72e-45	UP
PGSC0003DMG400002272	Transcription factor AP2-EREBP [Source:PGSC_GENE%3BAcc:PGSC0003DMG400002272]	0.0391183	3.70895	0.413526	0.0826362	0	3.41281	0.133805	0.134274	6.42277	0	Inf	0.40107	0.7614	FALSE	6.53949	0	Inf	0.3403	0.70695	FALSE	140.232	0	Inf	0.00029929	0.010212	UP	20.8511	2.6588	6.1289	2.9713	0.0017496	0.0035317	UP	3.9578	2.4143	0.71309	0.64561	0.76676	FALSE	168.792	2.41201		1.8e-37	2.42e-36	UP
PGSC0003DMG400003228	SAUR family protein [Source:PGSC_GENE%3BAcc:PGSC0003DMG400003228]	0.09806	8.63326	2.05179	1.02579	0.902387	9.61675	2.40572	1.64371	72.4927	32.6342	1.1515	0.50945	0.83317	FALSE	50.7949	33.4557	0.60243	0.75589	0.97896	FALSE	251.889	27.6329	3.1883	0.023955	0.17847	FALSE	65.6866	4.22807	6.0196	3.9575	0.0002283	0.0005088	UP	31.3196	3.83677	3.0291	5.15e-05	0.0001266	UP	249.262	3.84215		2.66e-32	2.95e-31	UP
Novel01970	PREDICTED: protein TRANSPARENT TESTA 12-like [Solanum tuberosum]	0.018565	2.64342	3.94815	1.39541	0.157096	6.72507	8.53294	4.01288	435.632	9.6694	5.4935	9.78e-05	0.0046364	UP	211.397	9.9128	4.4145	0.0016387	0.027182	UP	299.353	8.18752	5.1923	0.00080866	0.020584	UP	214.93	1.36264	6.7172	7.3013	5.69e-47	9.6e-46	UP	72.7212	1.23842	5.8758	3.99e-17	2.31e-16	UP	129.918	1.23481		3.68e-31	3.87e-30	UP
PGSC0003DMG400022764	Glutamate decarboxylase isoform3 [Source:PGSC_GENE%3BAcc:PGSC0003DMG400022764]	0.00517328	2.11435	1.60171	0.621332	0.219622	7.13203	4.44473	0.453342	405.968	24.1735	4.0699	0.0017404	0.03246	UP	42.5005	24.782	0.77819	0.69563	0.94586	FALSE	566.713	20.4688	4.7911	0.00036831	0.011735	UP	156.055	0.679179	8.225	7.844	1.07e-08	3.42e-08	UP	57.7094	0.618279	6.5444	1.02e-09	3.71e-09	UP	185.841	0.621126		6.08e-30	6.06e-29	UP
PGSC0003DMG400044171	P69E protein [Source:PGSC_GENE%3BAcc:PGSC0003DMG400044171]	0.00388877	0.909235	0.153619	0.337742	0.0150428	0.049066	0.0272817	0.0569257	3.6085	2.41735	0.57797	1	1	FALSE	7.81061	2.4782	1.6561	0.67496	0.93799	FALSE	5.72134	2.04688	1.4829	0.82622	1	FALSE	21.827	0.745655	7.4251	4.8715	0.0024243	0.0048073	UP	45.7906	0.680826	6.0716	4.34e-05	0.0001073	UP	116.648	0.678743		6.26e-29	6e-28	UP
PGSC0003DMG400030409	Conserved gene of unknown function [Source:PGSC_GENE%3BAcc:PGSC0003DMG400030409]	0.0171891	1.936	0.638799	0.220631	0.318024	5.82415	1.02356	1.01883	68.1449	25.3822	1.4248	0.42203	0.76662	FALSE	69.9079	26.0211	1.4258	0.36771	0.73389	FALSE	337.844	21.4922	3.9745	0.0045958	0.063831	FALSE	45.0937	1.63575	6.374	4.7849	3.91e-09	1.28e-08	UP	14.8278	1.48502	3.3198	0.016446	0.029468	UP	123.391	1.48776		9.46e-29	9.01e-28	UP
PGSC0003DMG400025747	Conserved gene of unknown function [Source:PGSC_GENE%3BAcc:PGSC0003DMG400025747]	0.058368	8.3466	2.23015	1.45032	0.824993	8.47771	3.64132	3.81038	53.4943	14.5041	1.8829	0.32765	0.70192	FALSE	57.4524	14.8692	1.95	0.23734	0.59321	FALSE	107.397	12.2813	3.1284	0.061333	0.30896	FALSE	34.6908	1.22394	6.7192	4.8249	2.9e-07	8.31e-07	UP	21.5371	1.11419	4.2727	7.27e-05	0.00017622	UP	117.167	1.11206		3.9e-28	3.63e-27	UP
PGSC0003DMG400006270	Pyruvate decarboxylase [Source:PGSC_GENE%3BAcc:PGSC0003DMG400006270]	0.0105298	1.08821	0.245378	0.968055	0.0186291	3.68365	0.227351	0.186666	24.8865	2.41735	3.3639	0.21603	0.57748	FALSE	20.9133	2.4782	3.0771	0.21418	0.5616	FALSE	342.058	2.04688	7.3847	3.32e-05	0.0020584	UP	28.1647	1.63001	6.2513	4.1109	1.73e-05	4.27e-05	UP	106.137	1.48588	6.1585	4.2e-13	1.94e-12	UP	112.76	1.48024		3.1e-26	2.67e-25	UP
PGSC0003DMG400016505	Helicase [Source:PGSC_GENE%3BAcc:PGSC0003DMG400016505]	0.00492756	0.603011	1.26677	0.431855	0.00580398	0.559845	1.09312	0.357661	189.335	1.20868	7.2914	0.00026724	0.0091387	UP	63.672	1.2391	5.6833	0.0092832	0.090204	FALSE	84.1631	1.02344	6.3617	0.0061025	0.075999	FALSE	233.395	1.22394	6.4945	7.5751	1.19e-42	1.74e-41	UP	76.0196	1.11419	6.0923	4.92e-18	2.97e-17	UP	100.272	1.11206		4.27e-24	3.31e-23	UP
Novel02598	PREDICTED: pleiotropic drug resistance protein 1-like [Solanum lycopersicum]	0.103279	11.1115	4.94015	1.35739	0.109243	7.72373	2.47275	2.18848	22.845	1.20868	4.2404	0.15664	0.49766	FALSE	20.6611	1.2391	4.0595	0.13643	0.44998	FALSE	61.4521	1.02344	5.908	0.015344	0.13572	FALSE	48.3536	1.36264	6.3128	5.1492	2.19e-10	7.76e-10	UP	12.7284	1.23842	3.3615	0.0073705	0.013933	UP	98.1648	1.23481		1.51e-23	1.15e-22	UP
PGSC0003DMG402024469	E2F [Source:PGSC_GENE%3BAcc:PGSC0003DMG402024469]	0.0101104	1.28369	3.98153	5.51717	0	2.1084	3.63856	4.00015	289.413	0	Inf	6.83e-06	0.0007699	UP	326.957	0	Inf	6.07e-07	8.37e-05	UP	146.024	0	Inf	0.00027556	0.009725	UP	336.194	1.15172	6.5463	8.1894	3.86e-39	5.04e-38	UP	445.141	1.05251	8.7243	2.6e-67	1.02e-65	UP	97.8473	1.04692		1.79e-23	1.35e-22	UP
PGSC0003DMG400028800	Gene of unknown function [Source:PGSC_GENE%3BAcc:PGSC0003DMG400028800]	0.00583639	1.62866	0.35999	0.019419	0.123069	7.81577	0.627614	0.161471	36.109	8.46073	2.0935	0.33905	0.71363	FALSE	9.48315	8.6737	0.12872	1	1	FALSE	387.316	7.16408	5.7566	0.00016887	0.0068127	UP	21.8871	0.478286	7.689	5.5161	1.68e-05	4.15e-05	UP	1.12394	0.433368	1.3749	0.81783	0.91459	FALSE	89.4184	0.433317		2.23e-23	1.68e-22	UP
PGSC0003DMG401030822	Glycosyltransferase [Source:PGSC_GENE%3BAcc:PGSC0003DMG401030822]	0.00606378	1.65307	0.591765	0.549778	0.109597	6.67619	1.7501	1.34656	96.5205	7.25205	3.7344	0.037463	0.23178	FALSE	76.2539	7.4346	3.3585	0.044424	0.24198	FALSE	319.829	6.14064	5.7028	0.00034721	0.011285	UP	34.6262	0.478286	7.6548	6.1778	1.38e-08	4.35e-08	UP	30.7256	0.433368	6.1477	9.51e-08	3.01e-07	UP	87.3241	0.433317		8.59e-23	6.3e-22	UP
PGSC0003DMG400024120	Peptide transporter [Source:PGSC_GENE%3BAcc:PGSC0003DMG400024120]	0.0504126	7.47705	2.95042	3.39024	0.412917	24.2656	2.89825	3.34111	339.568	58.0164	2.5492	0.038061	0.2331	FALSE	403.388	59.4768	2.7618	0.011746	0.10551	FALSE	2448.1	49.1251	5.6391	1.03e-05	0.00087573	UP	366.912	8.44612	6.7705	5.441	3.82e-07	1.09e-06	UP	402.139	7.67254	5.7118	3.98e-15	2.08e-14	UP	838.955	7.68422		1.22e-21	8.45e-21	UP
PGSC0003DMG400008544	Carbohydrate esterase [Source:PGSC_GENE%3BAcc:PGSC0003DMG400008544]	0.0067424	2.42852	1.1825	0.606278	0	2.3886	1.16177	0.258249	57.3688	0	Inf	0.010015	0.10595	FALSE	13.019	0	Inf	0.13185	0.44158	FALSE	102.841	0	Inf	0.001081	0.024935	UP	62.2745	0.478286	8.0569	7.0246	1.11e-12	4.52e-12	UP	30.5086	0.433368	6.1375	3.3e-08	1.08e-07	UP	115.395	0.433317		1.55e-21	1.07e-20	UP
PGSC0003DMG400020012	MYB transcription factor MYB117 [Source:PGSC_GENE%3BAcc:PGSC0003DMG400020012]	0.0141443	2.94494	0.0539266	0.00624605	0.0230573	2.71617	0.0205007	0.045557	0.908665	1.20868	-0.41161	0.94756	1	FALSE	1.99978	1.2391	0.69055	1	1	FALSE	102.432	1.02344	6.6451	0.0030084	0.048396	UP	2.5051	0.884351	7.2654	1.5022	0.67503	0.79609	FALSE	0.276987	0.805055	-1.5393	0.94687	1	FALSE	123.309	0.801497		1.7e-21	1.17e-20	UP
PGSC0003DMG400004337	MTN3 [Source:PGSC_GENE%3BAcc:PGSC0003DMG400004337]	0.0236725	2.24146	0	0.0104148	0	13.8601	0.951005	0.0712226	49.8531	0	Inf	0.014558	0.13385	FALSE	3.77917	0	Inf	0.5405	0.85756	FALSE	631.837	0	Inf	7.87e-08	2.44e-05	UP	0	1.77445	6.1273	#NAME?	0.43209	0.55689	FALSE	0.553974	1.60924	-1.5385	0.79445	0.89732	FALSE	112.579	1.61051		7.63e-21	5.11e-20	UP
PGSC0003DMG400023039	Mutt domain protein [Source:PGSC_GENE%3BAcc:PGSC0003DMG400023039]	0.0138789	1.94103	6.08704	4.81808	0.29412	6.36808	7.96498	11.1771	354.979	15.7128	4.4977	0.0010982	0.024039	UP	511.888	16.1083	4.99	5.17e-05	0.0022058	UP	247.812	13.3047	4.2192	0.0051521	0.068283	FALSE	287.535	0.884351	6.6911	8.3449	2.63e-30	2.45e-29	UP	217.206	0.805055	8.0758	1.59e-12	7.06e-12	UP	82.8171	0.801497		3.18e-20	2.07e-19	UP
PGSC0003DMG400015709	Glycosyltransferase [Source:PGSC_GENE%3BAcc:PGSC0003DMG400015709]	0.00596065	1.00013	0.318589	0.104054	0.0461147	2.61906	1.04148	0.220552	91.0517	4.8347	4.2352	0.025035	0.18593	FALSE	19.597	4.9564	1.9833	0.39649	0.75067	FALSE	197.969	4.09376	5.5957	0.0013215	0.02822	UP	29.5445	0.745655	6.9468	5.3082	1.17e-06	3.2e-06	UP	9.24856	0.680826	3.7639	0.054016	0.088373	FALSE	83.7338	0.678743		6.02e-20	3.86e-19	UP
PGSC0003DMG400010460	ATP binding protein [Source:PGSC_GENE%3BAcc:PGSC0003DMG400010460]	0.0053591	1.21939	0.129188	0.195025	0	0.516991	0.0886341	0.327669	5.57933	0	Inf	0.44429	0.78566	FALSE	21.1278	0	Inf	0.059367	0.28388	FALSE	27.6263	0	Inf	0.040316	0.24561	FALSE	8.56742	0.478286	7.3945	4.1629	0.053854	0.087632	FALSE	12.3248	0.433368	4.8298	0.0018318	0.003756	UP	72.9093	0.433317		3.31e-19	2.06e-18	UP
PGSC0003DMG400019120	Oxidoreductase [Source:PGSC_GENE%3BAcc:PGSC0003DMG400019120]	0.0145319	3.95383	7.62573	4.28404	0.0281065	42.4617	20.9249	5.02746	752.358	1.20868	9.2818	3.53e-08	2.03e-05	UP	185.164	1.2391	7.2234	9.08e-05	0.0033004	UP	1322.75	1.02344	10.336	4.38e-09	2.86e-06	UP	290.006	0.745655	7.6445	8.6034	2.4e-63	6.46e-62	UP	155.776	0.680826	7.838	6.93e-10	2.56e-09	UP	135.812	0.678743		4.36e-19	2.69e-18	UP
PGSC0003DMG400021426	1-aminocyclopropane-1-carboxylate synthase 3 [Source:PGSC_GENE%3BAcc:PGSC0003DMG400021426]	0.0162277	1.47974	1.17493	0.132574	0.182904	1.18992	0.207669	0.136094	20.5508	21.7562	-0.082227	0.85775	1	FALSE	13.8322	22.3038	-0.68926	0.55222	0.86489	FALSE	102.941	18.4219	2.4823	0.13103	0.45737	FALSE	123.608	2.30344	6.0687	5.7458	5.2e-25	3.87e-24	UP	13.3431	2.10503	2.6642	0.1442	0.21524	FALSE	140.546	2.09384		4.19e-18	2.46e-17	UP
PGSC0003DMG400020497	Major pollen allergen Ory s 1 [Source:PGSC_GENE%3BAcc:PGSC0003DMG400020497]	0.0652874	6.22383	0.622827	0.279161	0.0897765	39.9514	2.05574	1.24727	115.591	6.04338	4.2575	0.015851	0.14197	FALSE	71.3321	6.1955	3.5253	0.040164	0.22699	FALSE	1940.15	5.1172	8.5666	2.07e-08	8.77e-06	UP	37.0872	5.24109	6.1338	2.823	7.81e-05	0.0001819	UP	15.8416	4.76505	1.7332	0.088047	0.13782	FALSE	334.685	4.76632		1.29e-17	7.43e-17	UP
PGSC0003DMG400004659	UDP-D-glucuronic acid 4-epimerase [Source:PGSC_GENE%3BAcc:PGSC0003DMG400004659]	0.0061088	0.77691	0.23705	0.422648	0.172224	14.2344	1.01826	1.55768	95.5457	19.3388	2.3047	0.1558	0.49766	FALSE	149.781	19.8256	2.9174	0.032599	0.20051	FALSE	1157.57	16.375	6.1435	5.61e-06	0.00057608	UP	23.56	0.817875	6.5491	4.8483	0.0012955	0.0026615	UP	40.1803	0.742508	5.7579	6.42e-10	2.38e-09	UP	69.657	0.74388		2.43e-17	1.38e-16	UP
PGSC0003DMG400020112	Conserved gene of unknown function [Source:PGSC_GENE%3BAcc:PGSC0003DMG400020112]	0.0117339	2.34952	0.0480244	0.0799383	0.424158	5.82472	0.221929	0.254656	6.24622	14.5041	-1.2154	0.43693	0.78072	FALSE	7.46777	14.8692	-0.99358	0.46042	0.8005	FALSE	143.687	12.2813	3.5484	0.027973	0.19678	FALSE	1.45031	0.478286	7.2101	1.6004	0.7279	0.84436	FALSE	2.30201	0.433368	2.4092	0.47238	0.59887	FALSE	64.1617	0.433317		5.62e-17	3.12e-16	UP
PGSC0003DMG400019406	RING-H2 finger protein ATL67 [Source:PGSC_GENE%3BAcc:PGSC0003DMG400019406]	0.00675299	1.51785	0.174868	0.0540042	0	2.38121	0.021897	0.0269609	0.899945	0	Inf	1	1	FALSE	1.1457	0	Inf	1	1	FALSE	87.0454	0	Inf	0.0019906	0.036845	UP	7.79629	0.406065	7.3736	4.263	0.039276	0.0655	FALSE	2.27988	0.371687	2.6168	0.52868	0.65596	FALSE	61.0585	0.36818		3.77e-16	2.01e-15	UP
PGSC0003DMG400009037	Multidrug resistance protein ABC transporter family protein [Source:PGSC_GENE%3BAcc:PGSC0003DMG400009037]	0.00516664	1.14632	2.11456	1.68311	0.201912	8.77145	3.58391	6.81594	197.191	13.2954	3.8906	0.0099407	0.10556	FALSE	384.026	13.6301	4.8163	0.00017779	0.0053963	UP	421.192	11.2578	5.2255	0.0003497	0.011353	UP	123.006	0.406065	7.3549	8.2428	0.00022267	0.00049663	UP	93.5547	0.371687	7.9756	1.28e-08	4.33e-08	UP	60.2699	0.36818		6.16e-16	3.25e-15	UP
PGSC0003DMG400028633	WRKYd transcription factor [Source:PGSC_GENE%3BAcc:PGSC0003DMG400028633]	0.00726411	1.57276	1.47175	1.23903	0	3.28349	6.49804	3.35306	254.248	0	Inf	1.5e-05	0.0012778	UP	134.037	0	Inf	0.00013217	0.0043527	UP	111.879	0	Inf	0.0008081	0.020584	UP	60.9776	0.406065	7.32	7.2304	7.36e-15	3.38e-14	UP	49.0748	0.371687	7.0448	5.78e-13	2.65e-12	UP	58.832	0.36818		1.47e-15	7.56e-15	UP
PGSC0003DMG400030593	Proteinase inhibitor IIa [Source:PGSC_GENE%3BAcc:PGSC0003DMG400030593]	0.0185094	2.01981	0.699711	0.772606	0.0652289	14.8306	10.028	6.92746	311.79	2.41735	7.011	4.32e-05	0.0026313	UP	219.927	2.4782	6.4716	9e-05	0.0032864	UP	399.863	2.04688	7.6099	1.35e-05	0.001069	UP	22.9472	0.817875	6.3284	4.8103	4.15e-05	9.92e-05	UP	24.1766	0.742508	5.0251	5.63e-06	1.52e-05	UP	59.7788	0.74388		6.79e-15	3.38e-14	UP
PGSC0003DMG400025582	Ethylene-responsive transcription factor ERF114 [Source:PGSC_GENE%3BAcc:PGSC0003DMG400025582]	0.0195588	2.7164	0.553271	0.237809	0.170485	1.64307	0.395282	0.277073	16.2523	8.46073	0.94179	0.80746	1	FALSE	11.7026	8.6737	0.4321	0.99441	1	FALSE	59.6348	7.16408	3.0573	0.11907	0.4385	FALSE	24.3045	1.15746	6.6741	4.3922	0.00022266	0.00049663	UP	9.92463	1.05165	3.2384	0.080468	0.12696	FALSE	107.677	1.05444		9.48e-15	4.68e-14	UP
Novel00136	PREDICTED: glutamate decarboxylase 1-like, partial [Solanum tuberosum]	0.00961052	2.04684	1.12444	0.337951	0	10.8563	1.45542	0.594062	51.2418	0	Inf	0.014315	0.13268	FALSE	21.2584	0	Inf	0.05899	0.28274	FALSE	325.447	0	Inf	5.06e-06	0.00053299	UP	41.5571	0.478286	7.2993	6.4411	4.62e-05	0.00010995	UP	11.9297	0.433368	4.7828	0.0022507	0.0045645	UP	68.2522	0.433317		1.03e-14	5.1e-14	UP
Novel02409	PREDICTED: intracellular ribonuclease LX-like [Solanum tuberosum]	0.00998052	1.96645	2.21797	2.61888	0.248205	1.82313	2.51508	5.23655	71.2435	8.46073	3.0739	0.10247	0.40173	FALSE	152.945	8.6737	4.1402	0.0053761	0.062465	FALSE	44.6494	7.16408	2.6398	0.19697	0.55953	FALSE	66.8746	0.406065	7.1838	7.3636	2.73e-16	1.35e-15	UP	75.4892	0.371687	7.666	1.15e-19	7.5e-19	UP	53.5298	0.36818		3.74e-14	1.79e-13	UP
PGSC0003DMG400016792	Avr9/Cf-9 rapidly elicited protein 75 [Source:PGSC_GENE%3BAcc:PGSC0003DMG400016792]	0.0218013	1.91888	0.751279	0.343945	0.197019	3.2619	0.420243	0.489943	12.8507	7.25205	0.82539	0.87935	1	FALSE	15.4016	7.4346	1.0508	0.711	0.9538	FALSE	87.207	6.14064	3.828	0.039686	0.24314	FALSE	24.4816	0.956571	6.024	4.6777	0.00038522	0.00083659	UP	10.7055	0.866736	3.6266	0.010183	0.01886	UP	56.3957	0.866634		4.84e-14	2.3e-13	UP
PGSC0003DMG400023939	LOB domain-containing protein [Source:PGSC_GENE%3BAcc:PGSC0003DMG400023939]	0.0632648	9.77877	0.393687	0.0414566	0.296886	21.7184	1.15617	0.142892	39.5527	12.0868	1.7103	0.41729	0.76284	FALSE	4.93377	12.391	-1.3285	0.40018	0.75067	FALSE	641.165	10.2344	5.9692	3.14e-05	0.0019942	UP	14.1806	3.07061	6.8335	2.2073	0.037642	0.062979	FALSE	1.41693	2.78512	-0.97497	0.78658	0.89202	FALSE	317.93	2.78771		1.33e-13	6.16e-13	UP
PGSC0003DMG400021325	U-box protein [Source:PGSC_GENE%3BAcc:PGSC0003DMG400021325]	0.00484893	1.73597	0.443514	0.152045	0.803365	3.41278	0.611211	0.19937	42.2829	66.4771	-0.65278	0.54906	0.86374	FALSE	14.1327	68.1505	-2.2697	0.056364	0.27622	FALSE	203.208	56.2892	1.852	0.17768	0.53286	FALSE	32.4748	0.478286	8.0489	6.0853	5.98e-06	1.55e-05	UP	10.6276	0.433368	4.6161	0.090073	0.14068	FALSE	114.757	0.433317		2.66e-13	1.22e-12	UP
PGSC0003DMG400000277	Cytokinin oxidase/dehydrogenase 2 [Source:PGSC_GENE%3BAcc:PGSC0003DMG400000277]	0.00596065	0.640435	0.373291	0.0352267	0.069172	0.118932	0.03252	0.0102341	2.73988	7.25205	-1.4043	0.44524	0.78618	FALSE	0.919373	7.4346	-3.0155	0.14975	0.47174	FALSE	8.82296	6.14064	0.52287	0.94364	1	FALSE	34.599	0.745655	6.3034	5.5361	6.18e-08	1.87e-07	UP	3.14685	0.680826	2.2085	0.46889	0.59494	FALSE	53.6083	0.678743		2.72e-13	1.25e-12	UP
PGSC0003DMG400013176	DUF26 domain-containing protein 2 [Source:PGSC_GENE%3BAcc:PGSC0003DMG400013176]	0.012743	1.12782	1.51685	1.26982	0	0.826035	0.797213	0.250623	39.0423	0	Inf	0.026795	0.19344	FALSE	12.3748	0	Inf	0.14717	0.46745	FALSE	35.3589	0	Inf	0.02678	0.19199	FALSE	78.0698	0.884351	6.0309	6.464	5.53e-18	2.99e-17	UP	62.4441	0.805055	6.2773	1.57e-15	8.41e-15	UP	52.4069	0.801497		4.88e-13	2.2e-12	UP
PGSC0003DMG402014514	PERK1 kinase [Source:PGSC_GENE%3BAcc:PGSC0003DMG402014514]	0.00352941	0.541814	0.190835	0.417185	0.552853	1.16213	1.15964	1.23593	110.091	62.8511	0.80868	0.61583	0.90883	FALSE	119.682	64.4332	0.89333	0.49804	0.82564	FALSE	95.7398	53.2189	0.84718	0.60653	0.89909	FALSE	19.1857	0.478286	6.8266	5.326	7.41e-05	0.00017304	UP	40.1045	0.433368	6.532	1.54e-08	5.17e-08	UP	49.1847	0.433317		5.05e-13	2.27e-12	UP
PGSC0003DMG401025764	Basic helix-loop-helix protein BHLH15 [Source:PGSC_GENE%3BAcc:PGSC0003DMG401025764]	0.00617744	0.939373	0.73558	0.303313	0.111651	4.6546	1.69629	0.504699	91.9365	7.25205	3.6642	0.043021	0.24956	FALSE	28.1266	7.4346	1.9196	0.35255	0.7197	FALSE	218.896	6.14064	5.1557	0.0018865	0.035704	UP	42.2429	0.478286	6.8133	6.4647	1.75e-10	6.23e-10	UP	16.6544	0.433368	5.2642	0.00012976	0.00030616	UP	48.7329	0.433317		5.94e-13	2.66e-12	UP
PGSC0003DMG400010414	Peptide methionine sulfoxide reductase msrA [Source:PGSC_GENE%3BAcc:PGSC0003DMG400010414]	0.0633843	5.98268	0.207461	0.390816	0.242312	15.7958	0.409203	0.422084	22.2732	15.7128	0.50337	0.91697	1	FALSE	23.2953	16.1083	0.53223	0.87365	1	FALSE	741.345	13.3047	5.8001	2.9e-05	0.001876	UP	11.915	4.90151	6.1192	1.2815	0.42133	0.54487	FALSE	21.3406	4.45591	2.2598	0.045569	0.075627	FALSE	309.725	4.45576		1.17e-12	5.13e-12	UP
PGSC0003DMG400016928	Conserved gene of unknown function [Source:PGSC_GENE%3BAcc:PGSC0003DMG400016928]	0.0164792	1.86466	0.886126	0.541436	0	1.57525	0.422021	0.278281	17.0358	0	Inf	0.12311	0.44085	FALSE	11.6068	0	Inf	0.16323	0.48807	FALSE	55.5513	0	Inf	0.0083326	0.092327	FALSE	38.1796	0.956571	6.386	5.3188	1.17e-07	3.47e-07	UP	22.2819	0.866736	4.6841	1.65e-05	4.26e-05	UP	72.4811	0.866634		9.68e-12	4.03e-11	UP
PGSC0003DMG400023577	DNA binding protein [Source:PGSC_GENE%3BAcc:PGSC0003DMG400023577]	0.0060212	0.963144	0.115338	0.289828	0.0213916	1.05205	0.0679393	0.00592539	3.23732	1.20868	1.4214	0.97139	1	FALSE	0.28865	1.2391	-2.1019	0.68112	0.93799	FALSE	43.313	1.02344	5.4033	0.037029	0.23256	FALSE	5.76797	0.406065	6.8831	3.8283	0.10664	0.16323	FALSE	13.8384	0.371687	5.2185	0.00072305	0.0015594	UP	43.4578	0.36818		1.57e-11	6.45e-11	UP
PGSC0003DMG400012623	NOI [Source:PGSC_GENE%3BAcc:PGSC0003DMG400012623]	0.0116297	1.82956	0.413052	0.105932	0.165268	6.62954	0.791219	1.30121	19.3254	4.8347	1.999	0.46782	0.80508	FALSE	32.6722	4.9564	2.7207	0.19215	0.53355	FALSE	141.83	4.09376	5.1146	0.004976	0.066851	FALSE	10.6834	0.406065	6.8582	4.7175	0.0077437	0.014383	UP	2.60299	0.371687	2.808	0.41388	0.53885	FALSE	42.7165	0.36818		2.54e-11	1.03e-10	UP
PGSC0003DMG400028028	Conserved gene of unknown function [Source:PGSC_GENE%3BAcc:PGSC0003DMG400028028]	0.0105318	0.936635	0.220112	0	0.063451	1.81937	0.034428	0.117382	2.13974	4.8347	-1.176	0.54513	0.86055	FALSE	7.69926	4.9564	0.63543	1	1	FALSE	99.3497	4.09376	4.601	0.014407	0.13093	FALSE	14.8247	0.956571	6.0392	3.954	0.036407	0.061079	FALSE	0	0.866736	#NAME?	0.76764	0.87693	FALSE	56.9916	0.866634		3.86e-11	1.55e-10	UP
PGSC0003DMG400014710	Enzyme of the cupin superfamily [Source:PGSC_GENE%3BAcc:PGSC0003DMG400014710]	0.0242804	3.55128	0.584438	0.432946	0.171133	2.6072	0.59342	0.880337	13.9001	4.8347	1.5236	0.64777	0.92791	FALSE	21.2443	4.9564	2.0997	0.36244	0.7283	FALSE	53.2079	4.09376	3.7001	0.076637	0.35051	FALSE	14.6059	0.817875	6.7516	4.1585	0.0026725	0.0052723	UP	10.3362	0.742508	3.7992	0.012578	0.022965	UP	80.1552	0.74388		4e-11	1.6e-10	UP
PGSC0003DMG400008124	Structural constituent of cell wall [Source:PGSC_GENE%3BAcc:PGSC0003DMG400008124]	0.0094405	1.19259	1.55091	1.00505	0	0.165	0.636474	0.269626	22.5894	0	Inf	0.078455	0.34548	FALSE	9.846	0	Inf	0.20214	0.54741	FALSE	5.12976	0	Inf	0.4368	0.80501	FALSE	58.3221	0.478286	6.5451	6.93	3.44e-14	1.52e-13	UP	36.0902	0.433368	6.3799	1.09e-09	3.97e-09	UP	40.466	0.433317		9.88e-11	3.88e-10	UP
PGSC0003DMG400014550	MYB transcription factor MYB84 [Source:PGSC_GENE%3BAcc:PGSC0003DMG400014550]	0.0110912	1.01605	0.070826	0.0749849	0.0542409	0.481963	0.166952	0.216446	9.31304	3.62603	1.3609	0.77639	0.98757	FALSE	12.3422	3.7173	1.7313	0.55409	0.86641	FALSE	23.0969	3.07032	2.9112	0.23577	0.60453	FALSE	4.18987	0.884351	6.0801	2.2442	0.33343	0.44801	FALSE	4.23292	0.805055	2.3945	0.25752	0.35962	FALSE	54.2255	0.801497		2.91e-10	1.11e-09	UP
PGSC0003DMG400006480	Protein TIFY 9 [Source:PGSC_GENE%3BAcc:PGSC0003DMG400006480]	0.0059236	0.796888	0.0206671	0.0802535	0.0841794	3.62201	0.147156	0.165883	7.05833	4.8347	0.5459	1	1	FALSE	8.07848	4.9564	0.70479	0.9394	1	FALSE	149.772	4.09376	5.1932	0.0037858	0.056306	FALSE	1.04953	0.406065	6.6335	1.37	0.89072	0.97814	FALSE	3.89381	0.371687	3.389	0.28216	0.38901	FALSE	36.5539	0.36818		9.11e-10	3.35e-09	UP
Novel00430	PREDICTED: latent-transforming growth factor beta-binding protein 4-like [Solanum tuberosum]	0.00616046	0.630645	0.476202	1.76556	0.259804	4.25901	11.2661	6.79326	611.13	16.9215	5.1746	6.37e-05	0.0034102	UP	378.727	17.3474	4.4484	0.00036164	0.0092312	UP	200.421	14.3282	3.8061	0.012393	0.12055	FALSE	27.4453	0.478286	6.2417	5.8425	1.29e-06	3.53e-06	UP	97.0697	0.433368	7.8073	2.66e-12	1.16e-11	UP	32.7901	0.433317		9.41e-09	3.21e-08	UP
PGSC0003DMG400027781	Conserved gene of unknown function [Source:PGSC_GENE%3BAcc:PGSC0003DMG400027781]	0.00698098	1.00666	0.275122	0.130937	3.14147	1.11098	0.194558	0.294864	6.67843	128.12	-4.2618	0.0011688	0.024921	DOWN	10.283	131.345	-3.675	0.0013218	0.023214	DOWN	33.0882	108.485	-1.7131	0.12995	0.45571	FALSE	9.93873	0.33959	6.7214	4.8712	0.12507	0.18832	FALSE	4.49578	0.30914	3.8622	0.15253	0.22637	FALSE	32.772	0.310563		1.06e-08	3.62e-08	UP
Novel01290	PREDICTED: probable xyloglucan endotransglucosylase/hydrolase protein 26-like [Solanum tuberosum]	0.0215926	1.92163	0.342747	0.234381	0	2.7794	0.305052	0.0799965	8.89408	0	Inf	0.29525	0.66874	FALSE	2.36263	0	Inf	0.74691	0.97434	FALSE	68.4497	0	Inf	0.0045444	0.063453	FALSE	10.3923	0.884351	6.0377	3.5547	0.13984	0.20831	FALSE	6.78179	0.805055	3.0745	0.07521	0.11946	FALSE	52.6534	0.801497		1.1e-08	3.74e-08	UP
PGSC0003DMG401025807	Conserved gene of unknown function [Source:PGSC_GENE%3BAcc:PGSC0003DMG401025807]	0.0502193	4.80749	4.73227	29.1982	0.0841095	8.56604	2.858	2.5234	103.868	3.62603	4.8402	0.011613	0.11662	FALSE	92.6119	3.7173	4.6389	0.0085655	0.085531	FALSE	268.908	3.07032	6.4526	0.0002161	0.0081432	UP	180.553	2.5823	6.1363	6.1276	1.17e-11	4.5e-11	UP	1063.89	2.35075	8.822	9.05e-83	5.6e-81	UP	165.611	2.35431		4.32e-08	1.4e-07	UP
Novel01870	PREDICTED: inorganic pyrophosphatase 1-like [Solanum tuberosum]	0.0257015	2.40545	0.804448	0.15494	0	0.0864819	0.163458	0.177993	2.09097	0	Inf	0.84135	1	FALSE	2.34779	0	Inf	0.74766	0.97437	FALSE	0.977039	0	Inf	1	1	FALSE	11.1162	0.478286	6.1124	4.5387	0.006857	0.012818	UP	2.04715	0.433368	2.24	0.54026	0.66705	FALSE	29.9786	0.433317		4.94e-08	1.6e-07	UP
PGSC0003DMG400013427	Polcalcin Jun o [Source:PGSC_GENE%3BAcc:PGSC0003DMG400013427]	0.0101594	0.937763	0.222181	0.103015	0	2.19969	0.264199	0.166313	8.80892	0	Inf	0.29077	0.66347	FALSE	5.62605	0	Inf	0.39698	0.75067	FALSE	63.6672	0	Inf	0.0058	0.073581	FALSE	7.761	0.478286	6.0919	4.0203	0.036838	0.061757	FALSE	3.42595	0.433368	2.9828	0.265	0.36842	FALSE	29.5559	0.433317		7.14e-08	2.28e-07	UP
PGSC0003DMG400024310	Conserved gene of unknown function [Source:PGSC_GENE%3BAcc:PGSC0003DMG400024310]	0.0118235	1.13748	0.499413	0.728894	0.426655	0.121101	0.439744	0.241731	17.641	20.5475	-0.22003	0.78217	0.99084	FALSE	10.0671	21.0647	-1.0652	0.38608	0.75064	FALSE	4.18994	17.3985	-2.054	0.22525	0.59415	FALSE	21.2605	0.679179	6.1385	4.9682	7.69e-05	0.00017922	UP	29.7657	0.618279	5.5892	2.98e-07	9.02e-07	UP	43.7569	0.621126		1.38e-07	4.3e-07	UP
PGSC0003DMG400031079	Nodulin family protein [Source:PGSC_GENE%3BAcc:PGSC0003DMG400031079]	0.00555305	0.696901	0.380422	0.25405	0	0.0514835	0.106838	0.132296	11.7696	0	Inf	0.20635	0.56473	FALSE	15.0261	0	Inf	0.10804	0.39806	FALSE	4.95516	0	Inf	0.42336	0.79489	FALSE	44.967	0.884351	6.5348	5.6681	4.42e-05	0.00010553	UP	28.5697	0.805055	5.1493	0.0009528	0.0020247	UP	74.3117	0.801497		2.44e-07	7.46e-07	UP
PGSC0003DMG400001332	SDG14 (SET DOMAIN PROTEIN 14)%3B DNA binding / protein binding / zinc ion binding [Source:PGSC_GENE%3BAcc:PGSC0003DMG400001332]	0.0019262	0.232174	0.116361	0.0865116	0.0408866	0.158374	0.0707332	0.0521174	8.52354	6.04338	0.4961	1	1	FALSE	6.53432	6.1955	0.076817	1	1	FALSE	16.9503	5.1172	1.7279	0.54024	0.86033	FALSE	15.2271	0.33959	6.4631	5.4867	0.003036	0.0059473	UP	10.8137	0.30914	5.1285	0.0045609	0.0088949	UP	27.3987	0.310563		2.49e-07	7.6e-07	UP
PGSC0003DMG400027645	Gibberellin 2-oxidase [Source:PGSC_GENE%3BAcc:PGSC0003DMG400027645]	0.0260905	2.64067	1.88548	0.228582	0.0392968	1.67095	0.240312	0.0239989	6.21587	1.20868	2.3625	0.67013	0.93901	FALSE	0.630723	1.2391	-0.97421	0.84752	1	FALSE	37.1358	1.02344	5.1813	0.05268	0.28267	FALSE	51.3058	0.956571	6.2245	5.7451	1.03e-11	3.97e-11	UP	5.94258	0.866736	2.7774	0.12129	0.18413	FALSE	64.8029	0.866634		4.04e-07	1.21e-06	UP
PGSC0003DMG400016468	Bcr-associated protein%2C bap [Source:PGSC_GENE%3BAcc:PGSC0003DMG400016468]	0.00427721	0.47977	0.191902	0.262068	0.0181581	0.77976	0.516186	0.531759	28.6626	1.20868	4.5677	0.10768	0.41319	FALSE	30.2592	1.2391	4.61	0.06585	0.30267	FALSE	37.5203	1.02344	5.1962	0.051113	0.27845	FALSE	11.2993	0.33959	6.3597	5.0563	0.0060915	0.011474	UP	14.7097	0.30914	5.5724	0.0027624	0.0055451	UP	25.5036	0.310563		8.12e-07	2.38e-06	UP
PGSC0003DMG400030627	Tubulin alpha-3 chain [Source:PGSC_GENE%3BAcc:PGSC0003DMG400030627]	0.00283875	0.309089	0.0997881	0.127019	0.0482056	0.0549765	0.0760466	0.0616447	6.28164	4.8347	0.37771	1	1	FALSE	5.29365	4.9564	0.09497	1	1	FALSE	4.02391	4.09376	-0.024827	0.87743	1	FALSE	8.84598	0.33959	6.3154	4.7032	0.019998	0.034969	UP	10.7975	0.30914	5.1263	0.0049347	0.0095776	UP	24.7336	0.310563		1.33e-06	3.82e-06	UP
PGSC0003DMG400022993	Peptide transporter [Source:PGSC_GENE%3BAcc:PGSC0003DMG400022993]	0.00211135	0.373263	0.126078	0.0706206	0	1.13036	0.168518	0.24854	18.8997	0	Inf	0.10765	0.41319	FALSE	28.6742	0	Inf	0.030523	0.1921	FALSE	110.256	0	Inf	0.00084157	0.02116	UP	15.042	0.33959	7.0159	5.4691	0.00085316	0.0017901	UP	8.0361	0.30914	4.7002	0.021738	0.038142	UP	40.1934	0.310563		3.54e-06	9.8e-06	UP
PGSC0003DMG400010866	Lysine/histidine transporter [Source:PGSC_GENE%3BAcc:PGSC0003DMG400010866]	0.00351061	0.599215	0.00320123	0.00297556	0.0740262	8.73981	0.467783	0.106459	44.6845	8.46073	2.4009	0.24089	0.60493	FALSE	10.473	8.6737	0.27195	1	1	FALSE	724.133	7.16408	6.6593	6.03e-06	0.0006061	UP	0.324377	0.478286	6.9799	-0.5602	1	1	FALSE	0.284985	0.433368	-0.60471	1	1	FALSE	54.6989	0.433317		5.96e-06	1.62e-05	UP
PGSC0003DMG400001706	RING-H2 finger protein ATL5A [Source:PGSC_GENE%3BAcc:PGSC0003DMG400001706]	0.00859604	0.823215	0.120338	0.0970207	0	2.72909	0.342229	0.424073	9.51531	0	Inf	0.26841	0.63849	FALSE	12.0951	0	Inf	0.15249	0.47544	FALSE	64.4712	0	Inf	0.0049633	0.066712	FALSE	3.53003	0.33959	6.1318	3.3778	0.33248	0.4472	FALSE	2.73149	0.30914	3.1434	0.40777	0.5322	FALSE	21.777	0.310563		7.28e-06	1.96e-05	UP
PGSC0003DMG400016261	Conserved gene of unknown function [Source:PGSC_GENE%3BAcc:PGSC0003DMG400016261]	0.00436168	0.408823	0.373468	0.172874	0.185167	1.50413	0.417749	0.324839	22.8491	12.0868	0.91871	0.76089	0.97925	FALSE	18.1649	12.391	0.55186	0.89939	1	FALSE	70.7159	10.2344	2.7886	0.1267	0.4496	FALSE	21.5732	0.33959	6.1006	5.9893	2.54e-05	6.2e-05	UP	9.51354	0.30914	4.9437	0.041716	0.0697	FALSE	21.3119	0.310563		9.92e-06	2.64e-05	UP
PGSC0003DMG400021226	Conserved gene of unknown function [Source:PGSC_GENE%3BAcc:PGSC0003DMG400021226]	0.00263639	0.244158	0.0348749	0.0030319	0	0	0	0	0	0	NA	NA	NA	NA	0	0	NA	NA	NA	NA	0	0	NA	NA	NA	NA	3.33102	0.33959	6.0828	3.2941	0.48746	0.61424	FALSE	0.276987	0.30914	-0.15844	1	1	FALSE	21.0502	0.310563		1.17e-05	3.1e-05	UP
PGSC0003DMG400024624	Conserved gene of unknown function [Source:PGSC_GENE%3BAcc:PGSC0003DMG400024624]	0.0051834	0.475426	0.750423	0.243388	0	0.197674	0.633039	0.105564	28.7755	0	Inf	0.05078	0.27581	FALSE	4.94267	0	Inf	0.43071	0.77456	FALSE	7.87419	0	Inf	0.27984	0.65726	FALSE	36.4602	0.33959	6.0697	6.7464	5.71e-09	1.85e-08	UP	11.3213	0.30914	5.1946	0.0035813	0.0070871	UP	20.8603	0.310563		1.25e-05	3.3e-05	UP
PGSC0003DMG400003227	SAUR family protein [Source:PGSC_GENE%3BAcc:PGSC0003DMG400003227]	0.00769732	1.61501	0.509868	0.10664	0.228743	2.05169	0.380267	0.349611	11.6895	8.46073	0.46636	1	1	FALSE	11.1593	8.6737	0.36353	1	1	FALSE	54.941	7.16408	2.939	0.13896	0.46919	FALSE	16.7016	0.33959	7.2635	5.6201	0.011908	0.021533	UP	3.34759	0.30914	3.4368	0.30119	0.4114	FALSE	47.7182	0.310563		1.55e-05	4.07e-05	UP
PGSC0003DMG400008600	UDP-glucosyltransferase [Source:PGSC_GENE%3BAcc:PGSC0003DMG400008600]	0.0034931	0.902471	0.0156228	0.0517712	0.0526121	6.95828	0.0705699	0.0267304	6.76725	6.04338	0.16321	1	1	FALSE	2.57115	6.1955	-1.2688	0.5012	0.82854	FALSE	580.057	5.1172	6.8247	9.65e-06	0.00084335	UP	1.5866	0.478286	7.5787	1.73	0.70977	0.82932	FALSE	5.01937	0.433368	3.5338	0.11784	0.17952	FALSE	82.8352	0.433317		1.67e-05	4.36e-05	UP
PGSC0003DMG400010465	Peroxidase [Source:PGSC_GENE%3BAcc:PGSC0003DMG400010465]	0.00534631	0.872963	1.7327	0.252371	0	1.15137	2.03338	0.701522	128.602	0	Inf	0.00049325	0.014036	UP	44.9609	0	Inf	0.0098778	0.094114	FALSE	62.024	0	Inf	0.005806	0.073581	FALSE	115.009	0.478286	6.9166	7.9097	8.8e-20	5.16e-19	UP	16.1181	0.433368	5.2169	0.015752	0.028312	UP	52.3477	0.433317		1.97e-05	5.11e-05	UP
PGSC0003DMG400013809	Trehalose-6-phosphate synthase [Source:PGSC_GENE%3BAcc:PGSC0003DMG400013809]	0.00484055	0.525134	0.214567	0.168804	0.0583256	7.91204	1.46239	0.537935	100.903	4.8347	4.3834	0.018474	0.15598	FALSE	38.2368	4.9564	2.9476	0.13627	0.44967	FALSE	476.532	4.09376	6.863	1.76e-05	0.0013199	UP	15.7369	0.478286	6.3242	5.0401	0.00054515	0.0011672	UP	11.7995	0.433368	4.767	0.01758	0.031339	UP	34.7204	0.433317		1.97e-05	5.12e-05	UP
PGSC0003DMG400009021	Gibberellin 2-oxidase [Source:PGSC_GENE%3BAcc:PGSC0003DMG400009021]	0.00597328	0.635217	0.498689	0.413936	0.0719743	1.22016	0.657895	2.08709	36.7578	4.8347	2.9266	0.2018	0.55866	FALSE	119.677	4.9564	4.5937	0.0052971	0.061805	FALSE	59.5783	4.09376	3.8633	0.061293	0.30892	FALSE	29.6003	0.478286	6.2981	5.9516	0.0019542	0.0039214	UP	23.4997	0.433368	5.7609	2.39e-06	6.66e-06	UP	34.0985	0.433317		0.00010581	0.00025479	UP
PGSC0003DMG400001406	ATP binding protein [Source:PGSC_GENE%3BAcc:PGSC0003DMG400001406]	0.00336917	0.596859	0.019587	0.00824794	0.0710438	1.16956	0.0314925	0.0257287	3.15003	8.46073	-1.4254	0.41306	0.7614	FALSE	2.57411	8.6737	-1.7526	0.33707	0.70359	FALSE	101.211	7.16408	3.8204	0.031844	0.21339	FALSE	2.0662	0.478286	7.0334	2.111	0.60845	0.73499	FALSE	0.830961	0.433368	0.93919	0.92951	1	FALSE	56.7655	0.433317		0.00023754	0.00055125	UP
PGSC0003DMG400009080	Triacylglycerol lipase [Source:PGSC_GENE%3BAcc:PGSC0003DMG400009080]	0.00935381	1.0035	1.21938	1.36213	0.0281769	1.52821	1.21714	0.980589	43.3604	1.20868	5.1649	0.049081	0.27091	FALSE	36.0812	1.2391	4.8639	0.043128	0.23764	FALSE	47.4195	1.02344	5.534	0.0305	0.20755	FALSE	46.2551	0.478286	6.311	6.5956	1.96e-11	7.44e-11	UP	49.3558	0.433368	6.8315	4.46e-13	2.06e-12	UP	34.4039	0.433317		0.00086341	0.0018871	UP
PGSC0003DMG400027030	Homeobox domain containing protein [Source:PGSC_GENE%3BAcc:PGSC0003DMG400027030]	0.00310236	0.307626	0.20773	0.18436	0.026341	0.645841	0.195872	0.321005	14.9756	2.41735	2.6311	0.39798	0.7614	FALSE	25.2957	2.4782	3.3515	0.15642	0.48267	FALSE	43.2618	2.04688	4.4016	0.062418	0.31177	FALSE	16.8578	0.33959	6.1824	5.6335	0.00028386	0.00062549	UP	14.2797	0.30914	5.5296	0.00059048	0.0012889	UP	22.5548	0.310563		0.0028503	0.0058554	UP
PGSC0003DMG400023125	Conserved gene of unknown function [Source:PGSC_GENE%3BAcc:PGSC0003DMG400023125]	29.1761	0.187963	0.0852477	0.786201	57.222	0.108714	0.0538071	1.94959	0.873247	1102.31	-10.302	3.32e-19	3.18e-15	DOWN	32.2084	1130.06	-5.1328	2.2e-10	2e-07	DOWN	1.48465	933.377	-9.2962	1.76e-15	1.69e-11	DOWN	1.45031	670.361	-7.7177	-8.8524	1.23e-96	7.88e-95	DOWN	12.8225	610.177	-5.5725	1.55e-74	7.61e-73	DOWN	2.89567	609.569		1.81e-86	1.1e-84	DOWN
PGSC0003DMG401020927	Putative bHLH transcription factor [Source:PGSC_GENE%3BAcc:PGSC0003DMG401020927]	25.5338	0.0896287	0.042175	0.36743	15.2627	0.109558	0.0145432	0.161326	0.582165	725.205	-10.283	3.68e-16	1.51e-12	DOWN	6.61962	743.46	-6.8114	3.95e-13	8.17e-10	DOWN	3.8121	614.064	-7.3317	4.42e-11	9.78e-08	DOWN	1.77185	1447.02	-8.5939	-9.6736	4.44e-90	2.42e-88	DOWN	14.8873	1316.89	-6.4669	1.91e-71	8.67e-70	DOWN	3.40442	1315.43		4.35e-84	2.47e-82	DOWN
PGSC0003DMG400030688	F-box-containing protein 1 [Source:PGSC_GENE%3BAcc:PGSC0003DMG400030688]	231.891	3.00905	3.9588	9.03319	135.129	3.83234	1.56775	7.56115	165.438	17050.8	-6.6874	9.03e-15	2.6e-11	DOWN	818.28	17480	-4.417	3.8e-08	1.18e-05	DOWN	344.725	14437.7	-5.3882	3.94e-10	4.73e-07	DOWN	441.555	34903.5	-6.7106	-6.3046	5.92e-74	2.15e-72	DOWN	967.513	31798.8	-5.0385	7.27e-55	1.98e-53	DOWN	303.027	31737.2		4.22e-81	2.21e-79	DOWN
PGSC0003DMG400003243	Gene of unknown function [Source:PGSC_GENE%3BAcc:PGSC0003DMG400003243]	82.1297	0.966728	2.07614	12.627	44.3366	1.38087	2.8032	20.6326	176.088	3352.87	-4.251	1.07e-08	8.18e-06	DOWN	1340.97	3437.26	-1.358	0.053676	0.27005	FALSE	74.1766	2839.02	-5.2583	4.2e-10	4.75e-07	DOWN	138.901	7408.76	-6.8508	-5.7371	4.68e-64	1.29e-62	DOWN	807.838	6750.1	-3.0628	4.25e-27	3.92e-26	DOWN	58.3484	6734.94		4.65e-81	2.43e-79	DOWN
PGSC0003DMG400017951	Non-LTR reverse transcriptase [Source:PGSC_GENE%3BAcc:PGSC0003DMG400017951]	7.30838	0.0598284	0.125974	0.411061	7.98432	0.0220412	0.195216	0.407311	8.76995	435.123	-5.6327	1.73e-07	5.79e-05	DOWN	19.0857	446.076	-4.5467	9.87e-07	0.00012123	DOWN	0.848233	368.438	-8.7627	1.67e-10	2.59e-07	DOWN	6.06814	475.087	-7.3733	-6.2908	2.65e-67	8.1e-66	DOWN	18.9498	432.75	-4.5133	3.01e-48	6.42e-47	DOWN	2.60381	431.716		1.83e-76	8.56e-75	DOWN
PGSC0003DMG400025858	C2H2L domain class transcription factor [Source:PGSC_GENE%3BAcc:PGSC0003DMG400025858]	2.73086	0.0529636	0.0621369	0.27707	4.11832	0.0566681	0.134307	0.195447	11.2418	418.202	-5.2173	8.33e-07	0.00016627	DOWN	16.9331	428.729	-4.6621	9.05e-07	0.000114	DOWN	4.08723	354.11	-6.4369	9.25e-08	2.74e-05	DOWN	5.57745	330.777	-6.133	-5.8901	1.66e-65	4.82e-64	DOWN	23.8207	301.258	-3.6607	2.17e-36	2.95e-35	DOWN	4.28377	300.643		6.37e-65	2.13e-63	DOWN
PGSC0003DMG400025468	Integrase core domain containing protein [Source:PGSC_GENE%3BAcc:PGSC0003DMG400025468]	2.03835	0.0342751	0.016992	0.0633437	0.445111	0.0452804	0.0321994	0.0372886	3.05303	51.973	-4.0894	0.0083967	0.094306	FALSE	3.73388	53.2813	-3.8349	0.005232	0.061382	FALSE	3.7924	44.0079	-3.5366	0.020584	0.16321	FALSE	1.75291	283.884	-6.3361	-7.3394	3.84e-67	1.16e-65	DOWN	6.27182	258.456	-5.3649	4.17e-49	9.29e-48	DOWN	3.19533	258.154		2.52e-58	6.96e-57	DOWN
PGSC0003DMG400001480	Gene of unknown function [Source:PGSC_GENE%3BAcc:PGSC0003DMG400001480]	5.36119	0.0787317	0.107304	0.483734	2.82353	0.227693	0.254718	0.0607564	6.1009	80.9812	-3.7305	0.0074366	0.087561	FALSE	1.49667	83.0197	-5.7936	4.86e-05	0.0021028	DOWN	4.7303	68.5705	-3.8576	0.0070592	0.083338	FALSE	2.72321	183.42	-6.5323	-6.0737	6.87e-42	9.79e-41	DOWN	11.7809	167.122	-3.8264	4.16e-25	3.52e-24	DOWN	1.80163	166.755		4.65e-41	7.2e-40	DOWN
PGSC0003DMG400004343	Flavonoid 8-O-methyltransferase [Source:PGSC_GENE%3BAcc:PGSC0003DMG400004343]	5.52447	0.0971977	2.11575	10.2174	0.22504	0.0353651	0.824686	4.50923	18.1416	6.04338	1.5859	0.58905	0.89176	FALSE	103.639	6.1955	4.0642	0.012401	0.1089	FALSE	0.694294	5.1172	-2.8817	0.2132	0.57639	FALSE	50.2517	176.962	-6.2718	-1.8162	5.04e-10	1.74e-09	DOWN	232.008	161.162	0.52566	0.03485	0.059035	FALSE	2.08307	160.954		5.64e-39	8.14e-38	DOWN
PGSC0003DMG400024113	Gene of unknown function [Source:PGSC_GENE%3BAcc:PGSC0003DMG400024113]	2.73988	0.019551	0.0203148	0.186794	3.28835	0.0507543	0.0910847	0.367303	2.70856	118.45	-5.4506	0.00013154	0.0056147	DOWN	11.2262	121.432	-3.4352	0.0027367	0.038647	DOWN	1.3625	100.297	-6.2019	4.24e-05	0.0024821	DOWN	0.648754	117.712	-7.5709	-7.5034	6.23e-32	6.18e-31	DOWN	5.68159	107.133	-4.237	2.84e-19	1.82e-18	DOWN	0.562893	107.028		3.09e-29	3.01e-28	DOWN
PGSC0003DMG400022674	Glutaredoxin [Source:PGSC_GENE%3BAcc:PGSC0003DMG400022674]	5.46126	0.0297168	0.0471617	0.779919	12.3618	0.189602	0.0418525	0.329892	1.306	453.253	-8.439	9.5e-12	1.37e-08	DOWN	10.3179	464.663	-5.493	1.19e-08	4.93e-06	DOWN	5.05787	383.79	-6.2456	7.37e-08	2.38e-05	DOWN	1.53197	238.824	-7.9598	-7.2844	1.52e-25	1.16e-24	DOWN	24.0694	217.332	-3.1746	3.35e-10	1.27e-09	DOWN	0.871407	216.947		1.64e-26	1.43e-25	DOWN
Novel00164	PREDICTED: importin-5-like [Solanum tuberosum]	8.81509	0.139725	3.63084	6.52126	0	0	0	0	0	0	NA	NA	NA	NA	0	0	NA	NA	NA	NA	0	0	NA	NA	NA	NA	33.2249	108.807	-6.4206	-1.7114	3.45e-06	9.1e-06	DOWN	57.1368	99.0994	-0.79446	0.017694	0.03153	DOWN	1.15441	98.8928		3.2e-25	2.61e-24	DOWN
PGSC0003DMG400013032	Conserved gene of unknown function [Source:PGSC_GENE%3BAcc:PGSC0003DMG400013032]	3.03876	0.0552466	0	0.0970049	1.21643	0.0201482	0.115466	0.346611	3.8518	48.347	-3.6498	0.015519	0.14013	FALSE	11.7582	49.564	-2.0756	0.094085	0.36794	FALSE	0.565489	40.9376	-6.1778	0.0011725	0.026055	DOWN	0	144.062	-6.2217	#NAME?	7.83e-32	7.74e-31	DOWN	3.26334	131.199	-5.3293	1.31e-22	9.81e-22	DOWN	1.75635	131.074		3.2e-24	2.49e-23	DOWN
PGSC0003DMG400015414	Conserved gene of unknown function [Source:PGSC_GENE%3BAcc:PGSC0003DMG400015414]	3.75631	0.0479209	0.0490331	0.850617	12.6399	0.123152	0.751561	1.28102	20.3166	410.95	-4.3382	2.1e-05	0.0016148	DOWN	35.5877	421.294	-3.5654	8.12e-05	0.0030958	DOWN	2.82744	347.97	-6.9433	2.56e-08	1.04e-05	DOWN	1.40676	145.653	-6.7379	-6.694	1.16e-23	8.12e-23	DOWN	23.363	132.513	-2.5038	3.9e-09	1.37e-08	DOWN	1.24029	132.383		3.86e-24	2.99e-23	DOWN
PGSC0003DMG400030199	Conserved gene of unknown function [Source:PGSC_GENE%3BAcc:PGSC0003DMG400030199]	2.3701	0.0472585	0.0134726	0.0137176	2.95582	0	0.200174	0.190288	8.1133	143.832	-4.148	0.0010386	0.023056	DOWN	7.92932	147.453	-4.2169	0.00023587	0.0066879	DOWN	0	121.789	#NAME?	1.94e-07	4.98e-05	DOWN	0.580609	137.551	-6.0925	-7.8882	5.5e-28	4.64e-27	DOWN	0.561972	125.152	-7.799	1.47e-27	1.39e-26	DOWN	1.83181	125.002		4.2e-24	3.26e-23	DOWN
Novel02433	PREDICTED: uncharacterized protein LOC104648689 [Solanum lycopersicum]	0.942574	0.00452353	0	0.0908094	0.419232	0	0	0.0172855	0	32.6342	#NAME?	0.00045369	0.013306	DOWN	1.15163	33.4557	-4.8605	0.0035164	0.046233	DOWN	0	27.6329	#NAME?	0.00077759	0.020024	DOWN	0	87.5216	-8.1429	#NAME?	2.81e-26	2.21e-25	DOWN	5.99483	79.7247	-3.7332	2.94e-13	1.37e-12	DOWN	0.281446	79.5545		7.38e-23	5.43e-22	DOWN
PGSC0003DMG400017558	Universal stress protein family protein [Source:PGSC_GENE%3BAcc:PGSC0003DMG400017558]	4.18234	0.0660963	1.35275	3.52833	24.8688	0.100426	3.24783	3.06391	170.961	1576.11	-3.2046	3.36e-05	0.0022342	DOWN	165.958	1615.79	-3.2833	6.97e-06	0.00051679	DOWN	4.57066	1334.57	-8.1898	1.04e-15	1.5e-11	DOWN	75.869	316.134	-6.4265	-2.059	1.21e-05	3.03e-05	DOWN	189.175	287.651	-0.6046	0.08187	0.12892	FALSE	3.33846	287.16		6.66e-20	4.26e-19	DOWN
PGSC0003DMG400020652	Conserved gene of unknown function [Source:PGSC_GENE%3BAcc:PGSC0003DMG400020652]	3.43889	0.0582701	0.325592	1.29346	2.37822	0.378568	0.560783	1.47183	30.62	155.919	-2.3483	0.037629	0.23178	FALSE	82.7088	159.844	-0.95055	0.29588	0.66475	FALSE	17.7516	132.024	-2.8948	0.013829	0.1279	FALSE	18.8592	268.907	-6.3291	-3.8338	1.21e-10	4.35e-10	DOWN	71.9361	244.744	-1.7665	7.31e-05	0.00017719	DOWN	3.04348	244.694		3.4e-18	2.01e-17	DOWN
PGSC0003DMG400035689	Flavonoid glucoyltransferase UGT73N1 [Source:PGSC_GENE%3BAcc:PGSC0003DMG400035689]	0.542241	0.00359435	0.398188	0.857585	2.92403	0.116949	1.36668	1.12503	111.325	286.456	-1.3635	0.13995	0.47112	FALSE	94.2051	293.667	-1.6403	0.063955	0.29695	FALSE	8.267	242.555	-4.8748	3.17e-05	0.0020027	DOWN	34.5324	63.3604	-7.6774	-0.87563	0.022729	0.039384	DOWN	70.9614	57.6832	0.29888	0.41105	0.53598	FALSE	0.281446	57.6114		1.05e-16	5.74e-16	DOWN
PGSC0003DMG400025948	Conserved gene of unknown function [Source:PGSC_GENE%3BAcc:PGSC0003DMG400025948]	2.20151	0.0295466	0.0773998	1.44388	0.577848	0.0378372	0	0.0158162	0	14.5041	#NAME?	0.0076183	0.088863	FALSE	0.34504	14.8692	-5.4294	0.011085	0.10138	FALSE	0.694294	12.2813	-4.1448	0.048407	0.27063	FALSE	1.72006	65.905	-6.6631	-5.2599	2.06e-15	9.74e-15	DOWN	30.5969	59.9671	-0.97079	0.025399	0.044042	DOWN	0.59152	59.9457		1.8e-16	9.71e-16	DOWN
PGSC0003DMG400041062	Anther-specific protein TA-29 [Source:PGSC_GENE%3BAcc:PGSC0003DMG400041062]	0.718912	0.00490726	0	0.0813235	0.336886	0.0690351	0.0549571	0.179347	3.29944	24.1735	-2.8731	0.087861	0.36685	FALSE	11.1029	24.782	-1.1584	0.35078	0.71804	FALSE	3.52174	20.4688	-2.5391	0.1396	0.47063	FALSE	0	61.5282	-7.6359	#NAME?	4.22e-19	2.4e-18	DOWN	4.96313	56.0051	-3.4962	1.49e-09	5.37e-09	DOWN	0.281446	55.9807		2.25e-16	1.21e-15	DOWN
Novel00206	--	1.24909	0.0244394	0.253277	0.677621	6.64295	0.33304	1.96234	6.57194	145.041	593.46	-2.0327	0.017479	0.1506	FALSE	502.766	608.398	-0.27513	0.65886	0.93143	FALSE	21.4761	502.509	-4.5483	7.58e-06	0.00071048	DOWN	20.0011	133.096	-6.1145	-2.7343	1.69e-06	4.58e-06	DOWN	51.4025	121.149	-1.2369	0.016005	0.028732	DOWN	1.74437	120.859		3.02e-15	1.54e-14	DOWN
PGSC0003DMG400016747	Transcription factor [Source:PGSC_GENE%3BAcc:PGSC0003DMG400016747]	2.05279	0.0185246	0.157841	0.044169	2.03665	0.0662771	0.0121647	0.143419	0.617583	122.076	-7.6269	2.95e-06	0.00040719	DOWN	7.41655	125.149	-4.0768	0.00042824	0.01042	DOWN	2.8284	103.367	-5.1917	0.00027865	0.0097675	DOWN	8.36095	146.76	-7.2353	-4.1336	1.66e-09	5.57e-09	DOWN	2.26176	133.6	-5.8843	9.55e-14	4.59e-13	DOWN	0.8865	133.576		3.45e-15	1.75e-14	DOWN
Novel01936	--	1.36428	0.0117972	0.0345656	0.518856	2.55755	0.0311483	0.268664	1.00196	14.3549	164.38	-3.5174	0.003307	0.050938	FALSE	55.4762	168.518	-1.603	0.093075	0.36551	FALSE	1.41372	139.188	-6.6214	8.6e-06	0.00077779	DOWN	1.96277	104.598	-7.2976	-5.7358	8.55e-13	3.51e-12	DOWN	28.1376	95.3046	-1.76	0.00082231	0.0017617	DOWN	0.605054	95.1901		1.03e-14	5.08e-14	DOWN
Novel00090	PREDICTED: isoleucine N-monooxygenase 1-like [Solanum lycopersicum]	1.35503	0.0254246	0	0.00891918	0.0611106	0	0	0.00250897	0	9.6694	#NAME?	0.021044	0.16805	FALSE	0.34504	9.9128	-4.8445	0.033246	0.20273	FALSE	0	8.18752	#NAME?	0.027072	0.19265	FALSE	0	255.707	-6.1791	#NAME?	1.52e-20	9.27e-20	DOWN	1.20019	232.616	-7.5985	3.79e-17	2.2e-16	DOWN	3.21042	232.63		3.21e-14	1.54e-13	DOWN
PGSC0003DMG400030430	Anionic peroxidase swpa7 [Source:PGSC_GENE%3BAcc:PGSC0003DMG400030430]	0.586427	0.00479949	0.0762334	0.237366	1.3509	0.0841782	0.0481326	0.235375	2.98166	99.1114	-5.0549	0.00048619	0.013918	DOWN	14.595	101.606	-2.7994	0.015485	0.12563	FALSE	4.4148	83.9221	-4.2486	0.0031003	0.04937	DOWN	4.94505	51.319	-7.3728	-3.3754	7.48e-08	2.25e-07	DOWN	14.8035	46.7316	-1.6585	0.0013226	0.0027593	DOWN	0.281446	46.6487		1.55e-13	7.16e-13	DOWN
PGSC0003DMG401015205	TDR8 protein [Source:PGSC_GENE%3BAcc:PGSC0003DMG401015205]	1.01459	0.0158487	0	0.0737441	0.408009	0	0.0172671	0.0531707	0.653	18.1301	-4.7952	0.020496	0.16606	FALSE	2.01165	18.5865	-3.2078	0.060527	0.28711	FALSE	0	15.3516	#NAME?	0.005812	0.073581	FALSE	0	53.7741	-6.4407	#NAME?	1.08e-16	5.45e-16	DOWN	2.78561	48.9564	-4.1354	6.8e-10	2.52e-09	DOWN	0.562893	48.8953		2.28e-13	1.05e-12	DOWN
PGSC0003DMG400005585	Gene of unknown function [Source:PGSC_GENE%3BAcc:PGSC0003DMG400005585]	0.895257	0.0148901	0.0912575	0.0419913	0.339744	0.0282448	0.0377472	0.0417082	1.59708	16.9215	-3.4053	0.067967	0.32183	FALSE	1.78532	17.3474	-3.2805	0.057589	0.27911	FALSE	1.03492	14.3282	-3.7913	0.051966	0.28055	FALSE	4.02355	53.1892	-6.3546	-3.7246	1.59e-09	5.34e-09	DOWN	1.77016	48.4565	-4.7747	3.68e-11	1.5e-10	DOWN	0.59152	48.4041		3.04e-13	1.39e-12	DOWN
PGSC0003DMG400024682	Gene of unknown function [Source:PGSC_GENE%3BAcc:PGSC0003DMG400024682]	1.14911	0.0220276	0.160235	0.0195598	0.541539	0.110393	0.196854	0.140432	5.40839	18.1301	-1.7451	0.27744	0.64844	FALSE	4.0166	18.5865	-2.2102	0.14803	0.46877	FALSE	2.61563	15.3516	-2.5532	0.16388	0.51294	FALSE	4.74061	45.887	-6.1431	-3.2749	1.04e-06	2.87e-06	DOWN	0.553974	41.7827	-6.2369	2.85e-11	1.17e-10	DOWN	0.58996	41.6947		2.99e-11	1.21e-10	DOWN
PGSC0003DMG400005873	Retroelement pol polyprotein [Source:PGSC_GENE%3BAcc:PGSC0003DMG400005873]	0.302232	0.00621178	0.0297629	0.0439568	0.29706	0.0464756	0.0682407	0.129749	6.81655	36.2603	-2.4113	0.10279	0.40233	FALSE	13.6541	37.173	-1.4449	0.24677	0.60434	FALSE	4.10693	30.7032	-2.9023	0.064931	0.31731	FALSE	3.2139	44.0088	-6.0469	-3.7754	5.97e-08	1.8e-07	DOWN	4.5259	40.1115	-3.1477	3.34e-06	9.21e-06	DOWN	0.605054	40.0038		6.32e-11	2.5e-10	DOWN
Novel00948	PREDICTED: uncharacterized protein LOC102594494 [Solanum tuberosum]	1.62003	0.0324718	0.0741681	0.0490909	1.83894	0.00834496	0	0.00827399	0	88.2333	#NAME?	2.22e-06	0.00033795	DOWN	0.34504	90.4543	-8.0343	1.04e-06	0.00012445	DOWN	0.282744	74.7111	-8.0457	2.37e-05	0.0016248	DOWN	3.15385	92.6994	-6.0852	-4.8774	1.47e-08	4.64e-08	DOWN	1.99303	84.3042	-5.4026	4.32e-09	1.51e-08	DOWN	1.24029	84.2088		4.6e-10	1.73e-09	DOWN
PGSC0003DMG400028098	Myb RL3 [Source:PGSC_GENE%3BAcc:PGSC0003DMG400028098]	2.93583	0.0188755	0.0351426	0	3.04516	0	0	0	0	56.8077	#NAME?	3.14e-05	0.0021099	DOWN	0	58.2377	#NAME?	5.15e-06	0.00041772	DOWN	0	48.1017	#NAME?	6.49e-05	0.0033477	DOWN	0.580609	65.3193	-7.719	-6.8138	2.52e-09	8.35e-09	DOWN	0	59.4299	#NAME?	1.46e-10	5.69e-10	DOWN	0.281446	59.3002		1.09e-09	4e-09	DOWN
PGSC0003DMG400007055	CYP72A58 [Source:PGSC_GENE%3BAcc:PGSC0003DMG400007055]	0.42152	0.00328462	0	0.00352796	0.326961	0.00459557	0.00322291	0	0.291082	35.0516	-6.9119	0.001124	0.024407	DOWN	0	35.9339	#NAME?	8.78e-05	0.0032389	DOWN	0.35367	29.6798	-6.3909	0.0019107	0.035944	DOWN	0	53.9076	-7.4455	#NAME?	4.28e-11	1.59e-10	DOWN	0.323109	49.1389	-7.2487	9.76e-10	3.57e-09	DOWN	0.281446	49.0602		1.1e-09	4.01e-09	DOWN
PGSC0003DMG400009802	Integrase core domain containing protein [Source:PGSC_GENE%3BAcc:PGSC0003DMG400009802]	0.641014	0.00811794	0.0276878	0.0472957	0.25191	0.0381036	0.0315816	0	1.21773	12.0868	-3.3112	0.10375	0.40432	FALSE	0	12.391	#NAME?	0.0067269	0.072143	FALSE	1.3625	10.2344	-2.9091	0.13459	0.46346	FALSE	1.1723	36.6868	-6.751	-4.9678	1.04e-07	3.1e-07	DOWN	1.93866	33.4155	-4.1074	7.44e-07	2.17e-06	DOWN	0.310073	33.3989		4.01e-09	1.41e-08	DOWN
PGSC0003DMG400006696	Catechol O-methyltransferase [Source:PGSC_GENE%3BAcc:PGSC0003DMG400006696]	1.2211	0.0216611	0	0.00775529	0	0	0	0.0274604	0	0	NA	NA	NA	NA	1.1546	0	Inf	1	1	FALSE	0	0	NA	NA	NA	NA	0	71.0218	-6.2583	#NAME?	4.61e-11	1.71e-10	DOWN	0.323109	64.6007	-7.6434	6.82e-10	2.52e-09	DOWN	0.844339	64.6342		1.24e-08	4.18e-08	DOWN
Novel02735	hypothetical protein AALP_AA3G369100 [Arabis alpina]	1.23464	0.0171626	0.0188272	0.0122894	6.44093	0.0219349	0.00623284	0	0.3265	396.446	-10.246	2.08e-12	3.52e-09	DOWN	0	406.425	#NAME?	2.31e-15	7.45e-12	DOWN	0.977039	335.688	-8.4245	5.01e-10	5.34e-07	DOWN	1.02493	90.6293	-6.6099	-6.4664	1.29e-08	4.09e-08	DOWN	0.646219	82.4216	-6.9949	3.37e-09	1.19e-08	DOWN	0.844339	82.4722		1.35e-08	4.55e-08	DOWN
PGSC0003DMG400028535	Conserved gene of unknown function [Source:PGSC_GENE%3BAcc:PGSC0003DMG400028535]	6.67675	0.0418527	0.00339759	0.0691335	17.5117	0.0413678	0.0142298	0.0174504	0.944083	1369.43	-10.502	2.55e-21	7.34e-17	DOWN	1.14273	1403.9	-10.263	1.12e-23	1.63e-19	DOWN	2.39741	1159.56	-8.9179	2.03e-16	5.83e-12	DOWN	0.234461	622.627	-7.7574	-11.375	1.01e-10	3.66e-10	DOWN	4.57977	565.825	-6.9489	1.14e-07	3.58e-07	DOWN	2.61578	565.997		2.21e-08	7.33e-08	DOWN
PGSC0003DMG400029879	Mechanosensitive ion channel domain-containing protein [Source:PGSC_GENE%3BAcc:PGSC0003DMG400029879]	0.724148	0.0138626	0.0425456	0.536089	7.72761	0.204667	0.163276	0.483834	17.2682	981.444	-5.8287	2.4e-10	3.04e-07	DOWN	52.4927	1006.15	-4.2606	1.25e-07	2.73e-05	DOWN	18.726	831.033	-5.4718	1.75e-08	8.01e-06	DOWN	4.77873	109.678	-6.1457	-4.5205	7.13e-06	1.83e-05	DOWN	57.6164	99.7138	-0.79131	0.1805	0.26313	FALSE	1.40723	99.6351		9.22e-08	2.91e-07	DOWN
PGSC0003DMG400028298	Gene of unknown function [Source:PGSC_GENE%3BAcc:PGSC0003DMG400028298]	0.983814	0.012708	0.0473952	1.06469	0.118304	0	0.0112727	0.754481	0.291082	3.62603	-3.6389	0.22539	0.58842	FALSE	19.8523	3.7173	2.417	0.31146	0.68061	FALSE	0	3.07032	#NAME?	0.12602	0.44817	FALSE	1.28399	35.9745	-6.7203	-4.8083	2.38e-06	6.37e-06	DOWN	27.6159	32.8098	-0.24863	0.60218	0.7286	FALSE	0.310073	32.6953		9.92e-08	3.13e-07	DOWN
PGSC0003DMG400025449	Extracellular matrix glycoprotein pherophorin-V30 [Source:PGSC_GENE%3BAcc:PGSC0003DMG400025449]	0.753784	0.0113538	0.0112661	0	0	0	0	0	0	0	NA	NA	NA	NA	0	0	NA	NA	NA	NA	0	0	NA	NA	NA	NA	0.324377	29.1952	-6.4901	-6.4919	2.58e-08	7.99e-08	DOWN	0	26.555	#NAME?	1.49e-08	5.02e-08	DOWN	0.29498	26.5167		1.29e-07	4.03e-07	DOWN
PGSC0003DMG400008042	Conserved gene of unknown function [Source:PGSC_GENE%3BAcc:PGSC0003DMG400008042]	0.784849	0.0115289	0.0474266	0.0231031	1.0289	0	0.133792	0.133836	3.39697	31.4256	-3.2096	0.047245	0.26481	FALSE	3.49866	32.2166	-3.2029	0.027514	0.17994	FALSE	0	26.6094	#NAME?	0.0009003	0.02205	DOWN	1.28116	28.5959	-6.5284	-4.4803	2.48e-06	6.62e-06	DOWN	0.600096	26.0623	-5.4406	5.1e-07	1.51e-06	DOWN	0.281446	25.9805		1.35e-07	4.19e-07	DOWN
PGSC0003DMG400023119	CYP92B3 [Source:PGSC_GENE%3BAcc:PGSC0003DMG400023119]	1.34043	0.00859628	0.105218	0.149209	0.236056	0.0669477	0.0369925	0.0959794	1.21773	9.6694	-2.9892	0.15181	0.49191	FALSE	3.40071	9.9128	-1.5435	0.34587	0.71198	FALSE	2.04374	8.18752	-2.0022	0.27629	0.65473	FALSE	3.80843	65.4939	-7.728	-4.1041	0.00083486	0.0017529	DOWN	5.17987	59.6436	-3.5254	0.0016309	0.0033652	DOWN	0.281446	59.6719		7.1e-06	1.92e-05	DOWN
PGSC0003DMG403005658	Conserved gene of unknown function [Source:PGSC_GENE%3BAcc:PGSC0003DMG403005658]	0.364709	0.00719396	0.0236751	0.0144162	0.271628	0.135082	0.0390906	0.0478799	1.61043	13.2954	-3.0454	0.11006	0.41552	FALSE	2.02055	13.6301	-2.754	0.12133	0.42301	FALSE	4.7106	11.2578	-1.2569	0.46463	0.81741	FALSE	1.02493	21.291	-6.103	-4.3767	7.83e-05	0.00018238	DOWN	0.600096	19.3738	-5.0128	3.65e-05	9.11e-05	DOWN	0.281446	19.3458		1.18e-05	3.11e-05	DOWN
Novel02529	PREDICTED: uncharacterized protein LOC104240587 [Nicotiana sylvestris]	0.278042	0.00569435	0	0	1.38777	0.10079	0.0185341	0.0311966	0.957432	85.8159	-6.4859	6.42e-05	0.0034284	DOWN	1.66584	87.9761	-5.7228	3.26e-05	0.0015795	DOWN	4.47268	72.6642	-4.022	0.0056662	0.07276	FALSE	0	20.5109	-6.048	#NAME?	9.94e-07	2.74e-06	DOWN	0	18.6982	#NAME?	2.89e-06	8e-06	DOWN	0.281446	18.622		1.89e-05	4.92e-05	DOWN
PGSC0003DMG400016573	Glutaredoxin [Source:PGSC_GENE%3BAcc:PGSC0003DMG400016573]	1.04362	0.0211841	0.21718	0.49951	0.42729	0	0	0.151475	0	15.7128	#NAME?	0.006088	0.076482	FALSE	4.68964	16.1083	-1.7803	0.25316	0.61266	FALSE	0	13.3047	#NAME?	0.0086164	0.094344	FALSE	7.0764	45.7649	-6.0659	-2.6932	0.015002	0.026731	DOWN	15.5321	41.5984	-1.4213	0.11871	0.18064	FALSE	0.620147	41.5449		9.75e-05	0.00023552	DOWN
PGSC0003DMG400027839	Gene of unknown function [Source:PGSC_GENE%3BAcc:PGSC0003DMG400027839]	1.79487	0.021286	0.0321227	0.113075	1.68049	0.0148909	0.178032	0.459034	4.92322	55.5991	-3.4974	0.017561	0.15102	FALSE	13.0679	56.9986	-2.1249	0.082692	0.34306	FALSE	0.35367	47.0782	-7.0565	0.00026906	0.0095782	DOWN	0.937843	70.8273	-6.8415	-6.2388	0.00048284	0.0010386	DOWN	3.14897	64.4623	-4.3555	0.0035722	0.0070701	DOWN	0.562893	64.5559		0.00026169	0.0006044	DOWN
PGSC0003DMG400020976	ECP63 protein [Source:PGSC_GENE%3BAcc:PGSC0003DMG400020976]	0.349406	0.00385956	0.0354024	0.292052	4.09364	0.407842	0.779779	1.1087	58.8201	373.481	-2.6667	0.005844	0.07475	FALSE	86.6786	382.882	-2.1432	0.013375	0.11376	FALSE	26.7681	316.243	-3.5624	0.00091839	0.022293	DOWN	2.8595	38.0266	-6.9441	-3.7332	0.0049527	0.0094348	DOWN	22.5144	34.6473	-0.6219	0.3534	0.47242	FALSE	0.281446	34.6559		0.00027631	0.00063699	DOWN
Novel01270	PREDICTED: stem-specific protein TSJT1 [Solanum lycopersicum]	1.29041	0.0105971	0.249657	1.32759	0.618374	0.308505	0.213616	3.27908	5.88528	20.5475	-1.8038	0.24479	0.60935	FALSE	93.6418	21.0647	2.1523	0.14263	0.46092	FALSE	7.26834	17.3985	-1.2593	0.43443	0.80353	FALSE	7.33846	51.1462	-7.3725	-2.8011	0.046457	0.076443	FALSE	37.3798	46.5824	-0.31753	0.58746	0.71357	FALSE	0.281446	46.6378		0.0012224	0.0026255	DOWN
PGSC0003DMG400017359	Gene of unknown function [Source:PGSC_GENE%3BAcc:PGSC0003DMG400017359]	0.416942	0.00714251	0.0268374	0.0182445	0	0.00903424	0	0	0	0	NA	NA	NA	NA	0	0	NA	NA	NA	NA	0.35367	0	Inf	1	1	FALSE	1.29751	27.1191	-6.3169	-4.3855	0.00445	0.0085331	DOWN	0.838959	24.6834	-4.8788	0.0041663	0.0081739	DOWN	0.310073	24.7203		0.0013722	0.0029311	DOWN
PGSC0003DMG402010496	Gene of unknown function [Source:PGSC_GENE%3BAcc:PGSC0003DMG402010496]	0.778892	0.0139888	0.32275	0.359875	0.192068	0.0703789	0.0152408	0.0157712	0.3265	4.8347	-3.8883	0.15688	0.49766	FALSE	0.34504	4.9564	-3.8445	0.12947	0.43758	FALSE	1.30462	4.09376	-1.6498	0.44229	0.80712	FALSE	7.18299	23.3773	-6.2383	-1.7025	0.20188	0.289	FALSE	7.67275	21.2263	-1.468	0.21069	0.30194	FALSE	0.281446	21.247		0.0038391	0.0077393	DOWN
PGSC0003DMG400014093	Flavonol synthase [Source:PGSC_GENE%3BAcc:PGSC0003DMG400014093]	2.40598	48.9537	356.577	298.735	4.50258	43.9029	387.647	475.334	29114.8	406.115	6.1637	0.0018219	0.033631	UP	36770.7	416.338	6.4647	0.0029621	0.040681	UP	2863.02	343.876	3.0576	0.0058841	0.074391	FALSE	28446.1	258.783	3.9071	6.7803	0	0	UP	22812.9	235.205	6.5998	5.12e-158	1.79e-155	UP	3526.14	235.047		4.39e-16	2.33e-15	UP
PGSC0003DMG400024643	Flavonoid 3'-monooxygenase [Source:PGSC_GENE%3BAcc:PGSC0003DMG400024643]	2.53085	26.6114	305.782	229.456	4.6813	13.6054	435.288	346.424	34638.4	447.21	6.2753	0.0030589	0.048016	UP	28366.9	458.467	5.9512	0.0019972	0.030971	UP	942.392	378.673	1.3154	0.2157	0.57981	FALSE	25830.2	288.35	2.9541	6.4851	4.32e-53	8.64e-52	UP	18587.4	262.322	6.1468	1.34e-16	7.55e-16	UP	2030.05	261.968		2.8e-07	8.5e-07	UP
PGSC0003DMG400001119	Histone H3.2 [Source:PGSC_GENE%3BAcc:PGSC0003DMG400001119]	0.306444	1.5149	81.3261	80.9753	1.51854	1.66202	65.9008	46.8805	2099.8	58.0164	5.1777	1.13e-05	0.0010759	UP	1532.63	59.4768	4.6875	1.49e-05	0.00090618	UP	46.1469	49.1251	-0.090227	0.8163	1	FALSE	2748.64	13.9617	1.8675	7.6211	2.36e-147	4.14e-145	UP	2616.55	12.6915	7.6877	3.01e-227	5.8e-224	UP	46.2183	12.6661		0.036498	0.063367	FALSE
PGSC0003DMG400007800	Anthocyanin acyltransferase [Source:PGSC_GENE%3BAcc:PGSC0003DMG400007800]	2.37469	38.0878	218.1	208.033	1.49775	27.2429	120.783	70.0696	9665.08	143.832	6.0703	3.59e-05	0.0023342	UP	5754.43	147.453	5.2863	2.29e-05	0.0012392	UP	1902.79	121.789	3.9657	0.000663	0.017923	UP	18524.1	271.962	3.5644	6.0899	0	0	UP	16898.4	247.304	6.0945	1.24e-265	3.99e-262	UP	2921.02	246.904		2.47e-26	2.13e-25	UP
PGSC0003DMG400002790	Conserved gene of unknown function [Source:PGSC_GENE%3BAcc:PGSC0003DMG400002790]	1.08201	25.8642	98.3077	110.027	1.82536	86.9472	222.763	261.111	8477.41	83.3986	6.6675	6.15e-06	0.0007149	UP	10243.9	85.4979	6.9047	5.36e-06	0.00042763	UP	2891.04	70.6174	5.3554	2.88e-05	0.001863	UP	3972.28	58.9552	4.14	6.0742	7.01e-103	5.11e-101	UP	4252.13	53.608	6.3096	4.53e-224	7.7e-221	UP	943.696	53.5246		3.76e-90	2.53e-88	UP
PGSC0003DMG400003563	Flavanone 3 beta-hydroxylase [Source:PGSC_GENE%3BAcc:PGSC0003DMG400003563]	2.70505	29.8411	422.072	466.916	3.26336	25.6179	463.1	551.575	27071.3	228.44	6.8888	0.00054625	0.014995	UP	33091.2	234.19	7.1426	0.00088965	0.017748	UP	1295.05	193.43	2.7431	0.011645	0.11483	FALSE	26131.4	225.834	3.0237	6.8544	0	0	UP	27675.5	205.45	7.0737	3.92e-118	5.7e-116	UP	1667.98	205.106		6.87e-22	4.83e-21	UP
PGSC0003DMG400007155	Anthranilate N-benzoyltransferase protein [Source:PGSC_GENE%3BAcc:PGSC0003DMG400007155]	0.268435	1.86709	26.4181	29.9346	0.380937	7.30701	23.3145	49.3097	1908.67	37.4689	5.6707	3.07e-06	0.00041573	UP	4156.72	38.4121	6.7577	1.81e-07	3.55e-05	UP	524.69	31.7266	4.0477	0.0019092	0.03594	UP	2297.31	31.4914	2.3591	6.1888	1.42e-20	8.67e-20	UP	2489.14	28.6636	6.4403	9.8e-130	1.93e-127	UP	146.672	28.5881		2.22e-06	6.24e-06	UP
PGSC0003DMG400004371	Myb 12 transcription factor [Source:PGSC_GENE%3BAcc:PGSC0003DMG400004371]	0.0314086	0.676187	16.7603	13.8446	0.539763	4.22273	37.27	28.5578	1802.61	31.4256	5.842	1.91e-06	0.00030489	UP	1426.13	32.2166	5.4682	1.56e-06	0.0001685	UP	179.007	26.6094	2.75	0.060175	0.30597	FALSE	862.864	2.18051	3.9893	8.6283	3.12e-58	7.33e-57	UP	683.507	1.98093	8.4306	8.92e-21	6.15e-20	UP	31.425	1.97869		2.45e-06	6.88e-06	UP
PGSC0003DMG400009418	Polygalacturonase QRT3 [Source:PGSC_GENE%3BAcc:PGSC0003DMG400009418]	0.219227	2.08048	32.6482	34.5824	0.485903	18.4803	39.8743	76.234	1402.2	20.5475	6.0926	1.14e-06	0.00020828	UP	2761.36	21.0647	7.0344	3.09e-08	1.01e-05	UP	569.899	17.3985	5.0337	0.0002279	0.0084477	UP	1220.46	11.0604	2.806	6.7859	5.91e-16	2.87e-15	UP	1236.13	10.091	6.9366	5.73e-87	3.89e-85	UP	70.2927	10.051		0.037472	0.064922	FALSE
PGSC0003DMG400019274	Indole-3-acetic acid-amido synthetase GH3.6 [Source:PGSC_GENE%3BAcc:PGSC0003DMG400019274]	0.0848442	1.95732	11.1028	9.11282	0.678341	32.5304	27.389	30.2918	3253.91	96.694	5.0726	2.37e-05	0.0017583	UP	3692.59	99.128	5.2192	9.04e-06	0.00061954	UP	3382.17	81.8752	5.3684	3.05e-05	0.0019444	UP	1398.85	14.4242	4.0891	6.5996	2.14e-10	7.59e-10	UP	1097.16	13.1247	6.3853	2.87e-29	2.9e-28	UP	222.811	13.0918		3.92e-34	4.66e-33	UP
PGSC0003DMG402027210	Glucosyltransferase [Source:PGSC_GENE%3BAcc:PGSC0003DMG402027210]	0.75084	4.12494	87.7849	125.874	2.31434	6.58884	88.7293	82.9353	4277.75	134.163	4.9948	4.51e-05	0.0026889	UP	4112.44	137.54	4.9021	2.65e-05	0.0013668	UP	279.983	113.602	1.3014	0.31788	0.69929	FALSE	4501.61	51.9124	2.0187	6.4382	2.11e-135	2.8e-133	UP	6169.41	47.2353	7.0291	7.73e-197	6.21e-194	UP	190.956	47.1251		1.83e-10	7.05e-10	UP
PGSC0003DMG400014600	Lyase [Source:PGSC_GENE%3BAcc:PGSC0003DMG400014600]	0.0608111	1.33247	7.22804	7.99853	0.191449	6.46619	11.2221	19.0479	1297.79	26.5909	5.609	4.23e-06	0.00054286	UP	2265.88	27.2602	6.3771	1.4e-07	2.99e-05	UP	655.375	22.5157	4.8633	0.00024307	0.008884	UP	887.363	10.0732	4.0161	6.4609	7.26e-11	2.65e-10	UP	938.399	9.16388	6.6781	1.92e-24	1.58e-23	UP	147.796	9.13454		4.22e-24	3.27e-23	UP
PGSC0003DMG400019139	Rop guanine nucleotide exchange factor [Source:PGSC_GENE%3BAcc:PGSC0003DMG400019139]	0.0387937	0.134355	5.69801	7.79486	0.791597	0.397006	14.7243	8.17246	1047.64	67.6858	3.9521	0.0003982	0.012149	UP	596.964	69.3896	3.1049	0.0031501	0.04269	UP	24.7071	57.3126	-1.2139	0.30813	0.68915	FALSE	431.007	3.95496	1.3543	6.7679	6.1e-63	1.63e-61	UP	563.657	3.59017	7.2946	1.17e-99	1.1e-97	UP	9.17649	3.58921		0.36987	0.49651	FALSE
PGSC0003DMG400023523	Histone H4 [Source:PGSC_GENE%3BAcc:PGSC0003DMG400023523]	0.29598	0.401659	33.5922	28.0165	0.159981	0.655008	31.6396	17.446	796.939	4.8347	7.3649	3.18e-07	8.82e-05	UP	450.852	4.9564	6.5072	3.56e-06	0.00031692	UP	14.315	4.09376	1.806	0.54998	0.86697	FALSE	898.061	10.6688	-0.0045437	6.3953	1.1e-112	9.64e-111	UP	715.312	9.71215	6.2026	3.73e-29	3.76e-28	UP	9.69722	9.72781		0.97379	1	FALSE
PGSC0003DMG400005101	DNA binding protein [Source:PGSC_GENE%3BAcc:PGSC0003DMG400005101]	0.115775	0.35964	14.808	14.2555	0.215006	1.47277	12.5535	10.4444	408.974	8.46073	5.5951	0.0001017	0.0047449	UP	351.366	8.6737	5.3402	7.79e-05	0.0030296	UP	42.2978	7.16408	2.5617	0.21893	0.58515	FALSE	515.303	5.43478	1.1973	6.5671	3.78e-91	2.11e-89	UP	473.671	4.95356	6.5793	6.7e-21	4.65e-20	UP	11.309	4.93165		0.22675	0.32648	FALSE
PGSC0003DMG400008629	Conserved gene of unknown function [Source:PGSC_GENE%3BAcc:PGSC0003DMG400008629]	0.101383	0.298454	8.49823	11.1646	1.65429	1.37209	15.8179	13.2608	759.958	95.4854	2.9926	0.0059175	0.075394	FALSE	654.888	97.8889	2.742	0.0069576	0.073798	FALSE	57.6747	80.8518	-0.48734	0.59301	0.89091	FALSE	433.83	6.98254	1.1163	5.9572	5.1e-74	1.86e-72	UP	544.653	6.37676	6.4164	4.51e-36	6.06e-35	UP	13.7594	6.34667		0.24984	0.35526	FALSE
PGSC0003DMG400007503	LOB domain-containing protein [Source:PGSC_GENE%3BAcc:PGSC0003DMG400007503]	0.0940545	1.17454	8.99493	11.5264	0.211503	1.34387	7.30189	9.65666	344.013	12.0868	4.831	0.00064158	0.016437	UP	471.113	12.391	5.2487	3.46e-05	0.0016453	UP	55.8558	10.2344	2.4483	0.20227	0.56045	FALSE	454.526	6.40858	3.2033	6.1482	2.19e-38	2.79e-37	UP	556.693	5.8177	6.5803	3.37e-61	1.11e-59	UP	53.6138	5.82085		4.28e-08	1.39e-07	UP
PGSC0003DMG400007405	Acyl CoA reductase [Source:PGSC_GENE%3BAcc:PGSC0003DMG400007405]	0.0846128	0.520495	14.1602	9.73267	0.450541	21.3524	23.563	38.3076	2054.91	47.1383	5.446	5.96e-06	0.00069652	UP	3430.68	48.3249	6.1496	5.86e-07	8.25e-05	UP	1634.56	39.9142	5.3559	2.53e-05	0.001689	UP	1309.01	10.5649	2.1807	6.9531	2.81e-05	6.81e-05	UP	859.261	9.66026	6.4749	1.1e-11	4.64e-11	UP	43.5028	9.59515		0.26216	0.37025	FALSE
PGSC0003DMG400023833	Microsomal oleic acid desaturase [Source:PGSC_GENE%3BAcc:PGSC0003DMG400023833]	0.0382724	0.303946	4.29403	8.48246	0	0.0993963	2.96317	6.31172	215.329	0	Inf	3.87e-05	0.0024796	UP	473.309	0	Inf	3.92e-08	1.18e-05	UP	6.40732	0	Inf	0.3415	0.7231	FALSE	334.223	4.01569	2.5523	6.379	1.13e-34	1.25e-33	UP	629.34	3.65359	7.4284	1.04e-10	4.09e-10	UP	21.3468	3.6393		0.0026472	0.0054664	UP
PGSC0003DMG400000684	Laccase [Source:PGSC_GENE%3BAcc:PGSC0003DMG400000684]	0.0612739	0.604971	9.84975	15.1174	0.389706	14.3781	25.8545	36.9823	2811.14	50.7644	5.7912	3e-06	0.00040913	UP	4125.43	52.0422	6.3087	6.11e-07	8.39e-05	UP	1365.92	42.9845	4.9899	6.66e-05	0.003414	UP	1134.21	9.51987	2.8611	6.8965	5.81e-13	2.4e-12	UP	1662.15	8.66423	7.5838	1.41e-18	8.7e-18	UP	62.9117	8.65849		7.68e-08	2.44e-07	UP
PGSC0003DMG400010892	Conserved gene of unknown function [Source:PGSC_GENE%3BAcc:PGSC0003DMG400010892]	0.0102439	0.031423	2.35529	2.10293	0.00869774	0.323022	0.73665	2.10317	84.6115	1.20868	6.1294	0.0076999	0.089307	FALSE	250.253	1.2391	7.658	1.56e-05	0.00093657	UP	32.3027	1.02344	4.9802	0.065167	0.31803	FALSE	289.591	1.69795	1.1678	7.4141	1.3e-33	1.38e-32	UP	247.309	1.5457	7.3219	7.47e-53	1.91e-51	UP	3.48875	1.55281		0.68734	0.81506	FALSE
PGSC0003DMG402024469	E2F [Source:PGSC_GENE%3BAcc:PGSC0003DMG402024469]	0.0101104	1.28369	3.98153	5.51717	0	2.1084	3.63856	4.00015	289.413	0	Inf	6.83e-06	0.0007699	UP	326.957	0	Inf	6.07e-07	8.37e-05	UP	146.024	0	Inf	0.00027556	0.009725	UP	336.194	1.15172	6.5463	8.1894	3.86e-39	5.04e-38	UP	445.141	1.05251	8.7243	2.6e-67	1.02e-65	UP	97.8473	1.04692		1.79e-23	1.35e-22	UP
PGSC0003DMG400004660	Serine hydroxymethyltransferase [Source:PGSC_GENE%3BAcc:PGSC0003DMG400004660]	0.24211	7.20678	20.2367	28.3083	0.553198	18.0511	55.4272	67.4644	5152.68	61.6424	6.3853	2.18e-06	0.00033494	UP	6436.28	63.1941	6.6703	1.1e-06	0.00012979	UP	1464.35	52.1954	4.8102	9.63e-05	0.0045328	UP	1994.31	32.1763	4.4561	5.9537	7.15e-197	3.67e-194	UP	2668.89	29.2811	6.5101	2.41e-201	2.05e-198	UP	641.274	29.2168		4.26e-24	3.3e-23	UP
PGSC0003DMG400019110	Chalcone synthase 2 [Source:PGSC_GENE%3BAcc:PGSC0003DMG400019110]	4.9045	46.5679	824.043	968.592	7.15957	31.8087	801.91	1263.3	62550	669.606	6.5456	0.018113	0.15424	FALSE	101271	686.462	7.2048	0.054532	0.2728	FALSE	2146.15	566.986	1.9204	0.064443	0.31594	FALSE	68158.6	547.012	2.8079	6.9612	0	0	UP	76739.2	497.293	7.2697	1.88e-61	6.25e-60	UP	3478.83	496.779		3.62e-05	9.13e-05	UP
PGSC0003DMG400027200	Family 1 glycosyltransferase [Source:PGSC_GENE%3BAcc:PGSC0003DMG400027200]	0.0931049	0.501197	11.1524	15.8455	0.78601	1.04394	16.0458	15.7377	758.754	44.721	4.0846	0.00046077	0.013417	UP	766.484	45.8467	4.0634	0.00018699	0.0055712	UP	43.4196	37.8673	0.19739	1	1	FALSE	561.332	6.31913	1.9907	6.473	7.79e-52	1.51e-50	UP	762.242	5.75861	7.0484	2.23e-118	3.27e-116	UP	22.7851	5.73315		0.0097168	0.018573	UP
PGSC0003DMG400030514	Histone chaperone ASF1A [Source:PGSC_GENE%3BAcc:PGSC0003DMG400030514]	0.0721008	0.755229	16.5902	10.4143	0.022519	0.650188	12.3724	6.62695	552.561	1.20868	8.8366	3.41e-07	9.07e-05	UP	304.83	1.2391	7.9426	4.53e-06	0.00038154	UP	25.3527	1.02344	4.6306	0.10945	0.4193	FALSE	787.632	4.6169	2.9505	7.4145	2.13e-131	2.67e-129	UP	472.718	4.21105	6.8107	6.88e-85	4.46e-83	UP	32.3728	4.18777		6.11e-05	0.00015063	UP
PGSC0003DMG400009006	BRCA1 C Terminus domain containing protein [Source:PGSC_GENE%3BAcc:PGSC0003DMG400009006]	0.0107158	0.0449303	1.12945	1.11113	0.0349169	0.0548567	0.951215	0.751407	219.125	9.6694	4.5022	0.0032909	0.050802	FALSE	177.949	9.9128	4.166	0.0036602	0.047691	UP	11.0947	8.18752	0.43837	1	1	FALSE	276.686	3.53887	1.6236	6.2888	3.55e-53	7.13e-52	UP	260.237	3.21749	6.3377	9.07e-52	2.22e-50	UP	9.92482	3.22094		0.19201	0.28267	FALSE
PGSC0003DMG400023039	Mutt domain protein [Source:PGSC_GENE%3BAcc:PGSC0003DMG400023039]	0.0138789	1.94103	6.08704	4.81808	0.29412	6.36808	7.96498	11.1771	354.979	15.7128	4.4977	0.0010982	0.024039	UP	511.888	16.1083	4.99	5.17e-05	0.0022058	UP	247.812	13.3047	4.2192	0.0051521	0.068283	FALSE	287.535	0.884351	6.6911	8.3449	2.63e-30	2.45e-29	UP	217.206	0.805055	8.0758	1.59e-12	7.06e-12	UP	82.8171	0.801497		3.18e-20	2.07e-19	UP
PGSC0003DMG400014895	ISWI chromatin remodeling complex ATPase ISW1 [Source:PGSC_GENE%3BAcc:PGSC0003DMG400014895]	0.0072795	0.0663992	1.3982	1.37278	0.0471828	0.325579	1.56613	1.38527	233.417	8.46073	4.786	0.0019043	0.034603	UP	212.323	8.6737	4.6135	0.0012163	0.021949	UP	42.3179	7.16408	2.5624	0.21504	0.5789	FALSE	221.781	1.55778	2.75	7.1535	3.54e-47	6.02e-46	UP	208.132	1.4242	7.1912	2.92e-46	5.85e-45	UP	9.51937	1.4151		0.057696	0.096106	FALSE
PGSC0003DMG400008093	LysM type receptor kinase [Source:PGSC_GENE%3BAcc:PGSC0003DMG400008093]	0.00625221	0.0724524	1.87121	1.96344	0.010192	0.0160168	1.00105	0.369571	98.9187	1.20868	6.3547	0.0045697	0.063319	FALSE	37.3294	1.2391	4.9129	0.039122	0.22286	FALSE	1.38859	1.02344	0.44019	1	1	FALSE	196.315	0.884351	3.0987	7.7943	4.73e-44	7.24e-43	UP	196.744	0.805055	7.933	1.13e-39	1.77e-38	UP	6.8661	0.801497		0.12699	0.1959	FALSE
PGSC0003DMG400002700	F-box family protein [Source:PGSC_GENE%3BAcc:PGSC0003DMG400002700]	0.0134428	0.229506	1.76015	1.95684	0.18031	0.483079	2.30275	1.40391	243.707	22.9648	3.4077	0.013823	0.12963	FALSE	152.811	23.5429	2.6984	0.042694	0.2366	FALSE	44.4594	19.4454	1.1931	0.55705	0.87146	FALSE	198.387	2.04182	3.652	6.6023	2.41e-15	1.14e-14	UP	210.587	1.8567	6.8255	4.52e-35	5.81e-34	UP	23.3306	1.85594		0.00015732	0.00037216	UP
PGSC0003DMG400029620	Chalcone synthase 1B [Source:UniProtKB/Swiss-Prot%3BAcc:Q43163]	3.51392	32.356	546.489	634.767	7.55152	27.1832	1010.87	1546.41	78996.7	707.075	6.8038	0.03185	0.21235	FALSE	124141	724.874	7.42	0.091639	0.36218	FALSE	1849.79	598.712	1.6274	0.12373	0.44708	FALSE	45249.9	392.387	2.7635	6.8495	5.61e-105	4.21e-103	UP	50357.1	356.868	7.1407	2.89e-47	5.98e-46	UP	2419.29	356.285		1.09e-09	4e-09	UP
PGSC0003DMG400030964	Purple acid phosphatase [Source:PGSC_GENE%3BAcc:PGSC0003DMG400030964]	0.0268908	0.591864	1.7919	5.16736	0.108656	9.05338	21.3402	10.8484	1775.39	10.8781	7.3506	4.34e-08	2.34e-05	UP	923.874	11.1519	6.3723	2.61e-07	4.56e-05	UP	658.395	9.21096	6.1595	2.05e-05	0.0014746	UP	158.775	3.2093	4.0233	5.6286	1.18e-09	3.98e-09	UP	436.785	2.90935	7.2301	5.12e-17	2.95e-16	UP	47.3257	2.91046		3.45e-09	1.22e-08	UP
PGSC0003DMG400016996	Nitrate transporter [Source:PGSC_GENE%3BAcc:PGSC0003DMG400016996]	0.0110671	0.470186	1.87913	2.35799	0.0714304	0.160317	1.18829	0.903409	115.177	8.46073	3.7669	0.027411	0.19609	FALSE	91.1896	8.6737	3.3942	0.032453	0.19982	FALSE	13.599	7.16408	0.92465	0.7814	0.98739	FALSE	196.846	1.56353	4.9662	6.9761	3.33e-42	4.81e-41	UP	235.966	1.42333	7.3732	4.68e-34	5.74e-33	UP	44.4708	1.42262		9.01e-10	3.32e-09	UP
PGSC0003DMG400012630	Cell division cycle protein cdt2 [Source:PGSC_GENE%3BAcc:PGSC0003DMG400012630]	0.0272529	0.206486	6.33428	3.23771	0.153742	0.849587	3.9274	2.67436	411.038	19.3388	4.4097	0.000867	0.020341	UP	288.096	19.8256	3.8611	0.0022791	0.033974	UP	77.5718	16.375	2.244	0.19894	0.56045	FALSE	704.805	4.08791	2.485	7.4297	2.57e-122	2.68e-120	UP	344.838	3.71527	6.5363	1.61e-66	6.16e-65	UP	20.7386	3.70444		0.0033402	0.0067907	UP
PGSC0003DMG400033006	Inosine-uridine preferring nucleoside hydrolase [Source:PGSC_GENE%3BAcc:PGSC0003DMG400033006]	0.0845159	4.54296	14.3085	13.7665	0.465141	12.7555	21.7806	18.4835	658.939	16.9215	5.2832	4.11e-05	0.0025631	UP	574.424	17.3474	5.0493	2.97e-05	0.001491	UP	336.101	14.3282	4.552	0.0017417	0.033947	UP	460.547	3.66754	5.3028	6.9724	8.76e-34	9.35e-33	UP	423.282	3.34072	6.9853	2.08e-37	2.95e-36	UP	131.984	3.34362		2.42e-15	1.24e-14	UP
PGSC0003DMG400018793	One-helix protein [Source:PGSC_GENE%3BAcc:PGSC0003DMG400018793]	0.0343774	0.955721	4.44138	2.94803	0	0.66145	2.18698	1.81746	93.1349	0	Inf	0.0019698	0.035342	UP	79.9908	0	Inf	0.001363	0.02358	UP	24.5201	0	Inf	0.051425	0.27899	FALSE	201.994	2.10829	4.3591	6.5821	3.46e-42	4.98e-41	UP	128.335	1.91925	6.0632	2.7e-28	2.63e-27	UP	39.2698	1.91356		0.0063549	0.012473	UP
PGSC0003DMG400011031	UDP-glucuronosyltransferase [Source:PGSC_GENE%3BAcc:PGSC0003DMG400011031]	0.246138	0.615331	32.119	36.1399	0.297611	1.15039	52.7844	27.3436	4636.07	31.4256	7.2048	2.18e-07	6.96e-05	UP	2462.58	32.2166	6.2562	1.97e-07	3.74e-05	UP	88.3409	26.6094	1.7311	0.31272	0.69407	FALSE	3000.59	31.0003	0.88104	6.5968	1.36e-25	1.04e-24	UP	3224.96	28.2247	6.8362	7.82e-60	2.47e-58	UP	51.8937	28.1771		0.054755	0.09165	FALSE
PGSC0003DMG400029401	RING-H2 finger protein ATL80 [Source:PGSC_GENE%3BAcc:PGSC0003DMG400029401]	0.0237176	0.688809	3.94702	3.48466	0.578961	1.1782	5.53024	2.46778	221.602	27.7995	2.9948	0.029047	0.20184	FALSE	101.279	28.4993	1.8293	0.18829	0.5281	FALSE	40.9376	23.5391	0.79837	0.73468	0.96937	FALSE	167.665	1.35836	4.4101	6.9476	8.36e-36	9.62e-35	UP	141.602	1.23656	6.8394	4.13e-32	4.71e-31	UP	26.4113	1.24225		1.48e-05	3.89e-05	UP
PGSC0003DMG400031816	Pectinesterase [Source:PGSC_GENE%3BAcc:PGSC0003DMG400031816]	0.0766165	2.09572	14.7451	12.3209	0.10498	0.760581	11.442	16.4896	1206.65	13.2954	6.5039	4.77e-07	0.00011349	UP	1790.19	13.6301	7.0372	1.91e-08	7.17e-06	UP	69.4421	11.2578	2.6249	0.15379	0.49705	FALSE	1652.65	11.5717	4.3336	7.158	9.35e-18	4.99e-17	UP	1318.57	10.5219	6.9694	2.29e-56	6.52e-55	UP	211.999	10.5145		5.59e-08	1.8e-07	UP
PGSC0003DMG400006713	Cembratrienol synthase 2a [Source:PGSC_GENE%3BAcc:PGSC0003DMG400006713]	0.013057	0.0434706	1.70147	2.17647	0.483635	0.157921	3.17891	3.49345	356.218	65.2685	2.4483	0.042578	0.24807	FALSE	403.842	66.9114	2.5935	0.01699	0.13369	FALSE	15.2666	55.2658	-1.856	0.15594	0.50083	FALSE	203.076	2.10255	1.2976	6.5937	2.34e-29	2.08e-28	UP	248.405	1.92012	7.0154	4.61e-53	1.19e-51	UP	4.68532	1.90604		0.46138	0.59527	FALSE
PGSC0003DMG400026575	Class III peroxidase [Source:PGSC_GENE%3BAcc:PGSC0003DMG400026575]	0.0881741	0.389741	14.2232	16.8031	0.0738238	0.397111	13.9493	4.00898	753.517	4.8347	7.2841	4.49e-07	0.00011023	UP	223.801	4.9564	5.4968	0.00026518	0.0073308	UP	18.8792	4.09376	2.2053	0.41524	0.78772	FALSE	824.181	6.8854	1.709	6.9033	9.01e-30	8.17e-29	UP	928.264	6.2538	7.2137	4.88e-12	2.1e-11	UP	20.3981	6.2392		0.14795	0.22438	FALSE
PGSC0003DMG400000984	3-oxo-5-alpha-steroid 4-dehydrogenase family protein [Source:PGSC_GENE%3BAcc:PGSC0003DMG400000984]	0.0488157	0.467811	4.18797	6.14229	0.117753	0.0225003	2.19179	2.79728	111.766	7.25205	3.946	0.024148	0.18262	FALSE	147.451	7.4346	4.3098	0.00457	0.056069	FALSE	0.990085	6.14064	-2.6328	0.22547	0.59444	FALSE	228.162	3.58811	2.8217	5.9907	5.57e-44	8.49e-43	UP	320.175	3.28263	6.6079	2.68e-62	9.13e-61	UP	23.0199	3.256		0.013856	0.025884	UP
PGSC0003DMG400026391	Conserved gene of unknown function [Source:PGSC_GENE%3BAcc:PGSC0003DMG400026391]	0.0155978	0.154841	2.39482	2.21815	0.131988	0.0592646	1.41284	1.35523	86.3992	9.6694	3.1595	0.076578	0.34144	FALSE	85.0878	9.9128	3.1016	0.05127	0.26268	FALSE	3.11211	8.18752	-1.3955	0.39605	0.77528	FALSE	155.184	1.36264	2.8741	6.8314	2.71e-34	2.94e-33	UP	137.323	1.23842	6.7929	3.24e-32	3.7e-31	UP	9.05327	1.23481		0.05693	0.094968	FALSE
PGSC0003DMG400025246	Histone H3.2 [Source:PGSC_GENE%3BAcc:PGSC0003DMG400025246]	0.184678	0.621968	39.5302	71.3297	0.809333	0.59896	54.5664	44.6613	1633.27	29.0082	5.8152	2.04e-06	0.00031832	UP	1368.12	29.7384	5.5237	1.3e-06	0.00014746	UP	15.6084	24.5626	-0.65413	0.54871	0.86596	FALSE	1252.92	7.89415	1.3127	7.3103	2.59e-103	1.9e-101	UP	2160.85	7.18022	8.2334	1.17e-98	1.08e-96	UP	17.8125	7.17081		0.24821	0.35347	FALSE
PGSC0003DMG400017842	Cinnamoyl-CoA reductase [Source:PGSC_GENE%3BAcc:PGSC0003DMG400017842]	0.389187	8.3317	50.2438	22.1175	0.190481	1.31043	19.4495	17.4541	1440.66	16.9215	6.4117	4.91e-07	0.00011349	UP	1329.91	17.3474	6.2605	1.78e-07	3.53e-05	UP	83.9503	14.3282	2.5507	0.13477	0.46367	FALSE	3946.78	41.2337	3.9802	6.5807	2.75e-63	7.4e-62	UP	1663.32	37.5121	5.4706	1.07e-108	1.23e-106	UP	591.023	37.4495		7.42e-23	5.45e-22	UP
PGSC0003DMG400024159	Conserved gene of unknown function [Source:PGSC_GENE%3BAcc:PGSC0003DMG400024159]	0.00295811	0.00306169	1.24653	0.767278	0.0525466	0.0120487	0.57688	0.309484	55.0212	6.04338	3.1866	0.11779	0.42979	FALSE	30.441	6.1955	2.2967	0.26155	0.62329	FALSE	0.990085	5.1172	-2.3697	0.28418	0.66062	FALSE	126.845	0.406065	-0.38755	8.2871	4.38e-30	4.04e-29	UP	74.7425	0.371687	7.6517	2.08e-19	1.34e-18	UP	0.281446	0.36818		1	1	FALSE
PGSC0003DMG400000781	Extensin [Source:PGSC_GENE%3BAcc:PGSC0003DMG400000781]	0.0466042	0.157654	5.49321	5.36732	0	0.351244	5.92034	6.65576	180.37	0	Inf	9.86e-05	0.0046667	UP	210.06	0	Inf	1.08e-05	0.00069286	UP	9.32897	0	Inf	0.24	0.61006	FALSE	178.452	2.04182	1.3183	6.4495	3.73e-19	2.12e-18	UP	167.074	1.8567	6.4916	0.00060611	0.0013212	UP	4.62807	1.85594		0.4661	0.6	FALSE
PGSC0003DMG402023713	Polychome%2C UV-B-insensitive 4 [Source:PGSC_GENE%3BAcc:PGSC0003DMG402023713]	0.00404031	0.0149911	1.93452	3.28907	0.137219	0.0440012	1.62874	2.38178	95.6693	9.6694	3.3066	0.058033	0.29589	FALSE	143.572	9.9128	3.8563	0.0088545	0.087333	FALSE	2.23682	8.18752	-1.872	0.31795	0.69929	FALSE	120.571	0.33959	1.4429	8.4719	7.39e-29	6.45e-28	UP	195.967	0.30914	9.3081	2.9e-47	5.98e-46	UP	0.844339	0.310563		0.93746	1	FALSE
PGSC0003DMG400013816	Conserved gene of unknown function [Source:PGSC_GENE%3BAcc:PGSC0003DMG400013816]	0.0294163	0.927728	8.97185	11.8791	0.0348359	0.943354	9.60514	15.4878	277.206	1.20868	7.8414	3.53e-05	0.0023122	UP	459.16	1.2391	8.5336	2.47e-07	4.44e-05	UP	23.4327	1.02344	4.517	0.11341	0.42713	FALSE	275.317	1.21819	4.5399	7.8202	4.54e-59	1.09e-57	UP	349.082	1.11506	8.2903	2.38e-58	7.21e-57	UP	25.6936	1.10454		9.08e-06	2.43e-05	UP
PGSC0003DMG400028830	Myb-like DNA-binding domain%2C SHAQKYF class family protein [Source:PGSC_GENE%3BAcc:PGSC0003DMG400028830]	0.0202272	1.31844	3.37647	3.33078	0	1.2289	3.49919	3.89765	116.069	0	Inf	0.00080402	0.019437	UP	132.387	0	Inf	0.00014159	0.0045237	UP	35.2284	0	Inf	0.02483	0.18262	FALSE	118.539	0.956571	5.5909	6.9533	9.67e-16	4.63e-15	UP	111.762	0.866736	7.0106	2.38e-27	2.22e-26	UP	41.7691	0.866634		2.52e-10	9.64e-10	UP
PGSC0003DMG400000794	Extensin (ext) [Source:PGSC_GENE%3BAcc:PGSC0003DMG400000794]	6.68926	56.2204	670.866	1117.4	4.0838	48.4299	741.381	952.286	14386.5	95.4854	7.2352	1.9e-05	0.0015062	UP	19097.6	97.8889	7.608	3.29e-05	0.0015864	UP	820.341	80.8518	3.3429	0.0047484	0.065071	FALSE	13871.3	186.52	2.6308	6.2166	6.88e-87	3.44e-85	UP	22096.6	169.58	7.0257	3e-262	8.68e-259	UP	1049.93	169.519		6.89e-16	3.62e-15	UP
PGSC0003DMG400015548	Peroxidase 15 [Source:PGSC_GENE%3BAcc:PGSC0003DMG400015548]	0.021096	0.513579	2.06493	4.27168	0.224505	1.52328	17.2794	4.82675	1085.31	16.9215	6.0031	1.97e-06	0.00030907	UP	309.435	17.3474	4.1568	0.0010112	0.019292	UP	82.5483	14.3282	2.5264	0.14582	0.4817	FALSE	137.654	1.89737	4.1631	6.1809	5.55e-28	4.67e-27	UP	272.054	1.73334	7.2942	1.8e-31	1.99e-30	UP	30.9158	1.72567		0.00043621	0.00098567	UP
PGSC0003DMG400015918	Acyltransferase [Source:PGSC_GENE%3BAcc:PGSC0003DMG400015918]	0.0165555	0.140297	1.78286	1.78763	0	0.135309	0.938828	1.16968	71.7792	0	Inf	0.0050797	0.068156	FALSE	93.3198	0	Inf	0.00073039	0.015449	UP	9.08914	0	Inf	0.23593	0.60478	FALSE	146.718	1.83664	2.636	6.3198	1.55e-30	1.46e-29	UP	140.392	1.66993	6.3935	1.62e-14	8.17e-14	UP	10.4154	1.67557		0.057925	0.096437	FALSE
PGSC0003DMG400029348	Thioesterase family protein [Source:PGSC_GENE%3BAcc:PGSC0003DMG400029348]	0.0206271	1.24167	2.69541	2.22133	0.481573	4.59006	2.61362	1.88271	114.681	25.3822	2.1757	0.16059	0.50289	FALSE	84.7027	26.0211	1.7027	0.24375	0.60093	FALSE	175.331	21.4922	3.0282	0.04406	0.25764	FALSE	125.661	1.29616	5.4724	6.5991	7.68e-28	6.43e-27	UP	98.9905	1.17588	6.3955	2.26e-23	1.76e-22	UP	52.264	1.1772		2.79e-12	1.2e-11	UP
PGSC0003DMG402016309	Non-specific lipid-transfer protein [Source:PGSC_GENE%3BAcc:PGSC0003DMG402016309]	0.123237	0.709686	14.0409	17.2117	0.74784	18.9499	59.9069	83.7785	2350.91	35.0516	6.0676	1.21e-06	0.00021537	UP	3368.65	35.9339	6.5507	1.83e-07	3.55e-05	UP	649.357	29.6798	4.4515	0.00059875	0.016753	UP	581.593	6.88687	2.0873	6.4	1.25e-07	3.68e-07	UP	681.471	6.25107	6.7684	4.97e-30	5.18e-29	UP	26.5765	6.25416		0.045187	0.077069	FALSE
PGSC0003DMG400006595	Conserved gene of unknown function [Source:PGSC_GENE%3BAcc:PGSC0003DMG400006595]	0.00622894	0.0799472	1.63377	2.08139	0	0.0687674	1.2179	1.58869	65.3167	0	Inf	0.0068942	0.083395	FALSE	87.4429	0	Inf	0.00096177	0.01868	UP	3.16903	0	Inf	0.60094	0.89615	FALSE	93.0795	0.478286	3.2458	7.6044	1.49e-22	9.93e-22	UP	113.318	0.433368	8.0306	2.13e-28	2.08e-27	UP	4.11045	0.433317		0.19247	0.2833	FALSE
PGSC0003DMG400011655	Chalcone isomerase [Source:PGSC_GENE%3BAcc:PGSC0003DMG400011655]	1.71541	10.5239	319.594	423.563	3.62564	10.4427	419.991	664.016	16923	175.258	6.5934	0.00011961	0.0052729	UP	27519.9	179.67	7.259	0.00032607	0.0085434	UP	367.274	148.399	1.3074	0.29206	0.66944	FALSE	13660.9	98.8912	2.1779	7.11	1.1e-61	2.84e-60	UP	17340.9	89.9469	7.5909	1e-80	5.8e-79	UP	406.271	89.7819		4.13e-19	2.56e-18	UP
PGSC0003DMG400027946	CDC45 (Cell division cycle 45) [Source:PGSC_GENE%3BAcc:PGSC0003DMG400027946]	0.0206504	0.683605	3.29488	1.60737	0.103717	0.870763	2.37756	1.30221	299.886	15.7128	4.2544	0.0023918	0.040556	UP	168.69	16.1083	3.3885	0.013161	0.1128	FALSE	95.5437	13.3047	2.8442	0.094266	0.3873	FALSE	441.573	3.73255	4.6102	6.8863	2.79e-82	1.25e-80	UP	206.064	3.406	5.9189	2.08e-41	3.5e-40	UP	82.7059	3.38627		3.34e-16	1.78e-15	UP
PGSC0003DMG400028406	Zinc finger protein [Source:PGSC_GENE%3BAcc:PGSC0003DMG400028406]	0.0125202	0.347623	1.20614	1.88176	0	0.361249	0.982996	1.74037	66.8384	0	Inf	0.0063726	0.079083	FALSE	121.782	0	Inf	0.00021094	0.006136	UP	21.4725	0	Inf	0.065739	0.32002	FALSE	87.442	1.22394	4.3548	6.1587	2.83e-19	1.62e-18	UP	130.485	1.11419	6.8717	1.35e-30	1.44e-29	UP	22.7539	1.11206		3.89e-05	9.78e-05	UP
PGSC0003DMG400020848	Serine-threonine protein kinase%2C plant-type [Source:PGSC_GENE%3BAcc:PGSC0003DMG400020848]	0.00172451	0.0742535	0.571698	0.312264	0.0467534	0.134214	0.994727	0.378655	190.956	10.8781	4.1337	0.0072807	0.086302	FALSE	74.9273	11.1519	2.7482	0.084855	0.34893	FALSE	22.9072	9.21096	1.3144	0.62441	0.91078	FALSE	117.647	0.478286	4.9931	7.9424	3.28e-28	2.78e-27	UP	61.4422	0.433368	7.1475	3.77e-16	2.08e-15	UP	13.8	0.433317		0.0007978	0.001751	UP
PGSC0003DMG400014227	Conserved gene of unknown function [Source:PGSC_GENE%3BAcc:PGSC0003DMG400014227]	0.00789452	0.53267	1.22405	1.797	0.1673	1.14386	1.26691	1.69006	98.7239	15.7128	2.6515	0.10932	0.41477	FALSE	135.774	16.1083	3.0753	0.029453	0.18804	FALSE	77.3824	13.3047	2.5401	0.14914	0.48808	FALSE	101.672	0.884351	5.6392	6.8451	1.65e-23	1.15e-22	UP	142.492	0.805055	7.4676	1.51e-15	8.09e-15	UP	39.9451	0.801497		7.37e-10	2.73e-09	UP
PGSC0003DMG400024344	Anthocyanidin 3-O-glucosyltransferase [Source:PGSC_GENE%3BAcc:PGSC0003DMG400024344]	2.10799	40.8392	215.398	326.583	2.58496	29.5127	295.929	402.511	27597.6	288.873	6.578	0.00088513	0.020615	UP	38588.1	296.145	7.0257	0.0019807	0.030858	UP	2378.15	244.602	3.2813	0.0032474	0.050876	FALSE	21287.5	280.918	3.8365	6.2437	6.58e-169	1.91e-166	UP	30897.7	255.333	6.919	1.71e-196	1.34e-193	UP	3644.25	255.092		2.01e-10	7.72e-10	UP
PGSC0003DMG400014712	FLU (FLUORESCENT IN BLUE LIGHT)%3B binding [Source:PGSC_GENE%3BAcc:PGSC0003DMG400014712]	0.039411	0.0230578	3.10021	2.99343	0.949757	1.52146	8.67766	6.99116	220.942	29.0082	2.9291	0.032754	0.21522	FALSE	183.227	29.7384	2.6232	0.039669	0.22531	FALSE	33.5253	24.5626	0.44879	0.90391	1	FALSE	83.7909	1.43486	-1.2075	5.8678	1.42e-12	5.76e-12	UP	77.4548	1.3001	5.8967	6.82e-13	3.11e-12	UP	0.562893	1.29995		0.92993	1	FALSE
PGSC0003DMG400021869	Conserved gene of unknown function [Source:PGSC_GENE%3BAcc:PGSC0003DMG400021869]	0.011451	0.0184682	3.85695	1.74464	0.0304053	0.0741492	2.95628	1.77248	489.529	6.04338	6.3399	1.47e-05	0.0012669	UP	301.492	6.1955	5.6048	8.33e-05	0.0031479	UP	10.6317	5.1172	1.0549	0.80862	0.99864	FALSE	678.192	2.71525	0.24615	7.9645	1.26e-70	4.21e-69	UP	293.348	2.47585	6.8885	1.98e-59	6.21e-58	UP	2.92897	2.46954		0.98828	1	FALSE
PGSC0003DMG400015647	Conserved gene of unknown function [Source:PGSC_GENE%3BAcc:PGSC0003DMG400015647]	0.0700186	0.494984	10.2595	5.92256	0.154844	0.623195	7.74918	4.47721	252.84	6.04338	5.3867	0.00065405	0.016678	UP	149.063	6.1955	4.5886	0.0029503	0.040595	UP	17.4951	5.1172	1.7735	0.50506	0.83579	FALSE	354.266	3.26001	2.3821	6.7638	7.96e-40	1.06e-38	UP	195.478	2.97176	6.0395	3.48e-40	5.56e-39	UP	15.433	2.96048		0.019353	0.035355	UP
PGSC0003DMG400016960	Cytochrome P450 [Source:PGSC_GENE%3BAcc:PGSC0003DMG400016960]	0.00641491	0.200983	2.35011	1.16385	0.355546	0.29849	2.70157	1.48799	258.702	41.095	2.6543	0.041122	0.24323	FALSE	147.348	42.1294	1.8063	0.15926	0.48585	FALSE	24.6747	34.797	-0.49593	0.66323	0.9309	FALSE	240.417	0.884351	4.5335	8.0867	2.47e-12	9.86e-12	UP	113.98	0.805055	7.1455	1.68e-22	1.25e-21	UP	18.5619	0.801497		0.00083705	0.0018326	UP
PGSC0003DMG400002292	Conserved gene of unknown function [Source:PGSC_GENE%3BAcc:PGSC0003DMG400002292]	0.0142318	0.580389	2.75136	2.54372	0.2552	0.30092	4.86286	2.51689	208.897	13.2954	3.9738	0.0076827	0.089232	FALSE	111.607	13.6301	3.0336	0.03805	0.21912	FALSE	11.3718	11.2578	0.014525	0.8696	1	FALSE	126.845	0.884351	4.9118	7.1642	4.1e-16	2.01e-15	UP	111.973	0.805055	7.1199	3.89e-20	2.6e-19	UP	24.127	0.801497		7.07e-06	1.91e-05	UP
PGSC0003DMG400000621	NtEIG-A1 protein [Source:PGSC_GENE%3BAcc:PGSC0003DMG400000621]	0.297505	11.6752	41.174	28.1909	0.478272	50.848	39.7718	11.3748	1591.28	22.9648	6.1146	9.14e-07	0.00017834	UP	465.058	23.5429	4.304	0.00028604	0.0077461	UP	1769.39	19.4454	6.5077	1.68e-06	0.00023678	UP	1749.09	17.0337	4.8549	6.6821	1.07e-63	2.92e-62	UP	1143.15	15.4739	6.207	1e-23	7.96e-23	UP	447.643	15.4688		2.19e-21	1.5e-20	UP
PGSC0003DMG400011792	ATP binding protein [Source:PGSC_GENE%3BAcc:PGSC0003DMG400011792]	0.0122666	0.231682	1.07184	1.80425	0.0351698	0.35865	0.113424	0.585295	15.9885	6.04338	1.4036	0.66299	0.9344	FALSE	85.6814	6.1955	3.7897	0.023973	0.16574	FALSE	44.9424	5.1172	3.1347	0.14134	0.47356	FALSE	162.92	2.51436	3.8003	6.0178	3.15e-33	3.3e-32	UP	262.313	2.29094	6.8392	1.15e-54	3.11e-53	UP	31.7875	2.28174		4.32e-06	1.19e-05	UP
PGSC0003DMG400026167	Lipid binding protein [Source:PGSC_GENE%3BAcc:PGSC0003DMG400026167]	0.00582516	0.175644	1.66238	1.57666	0.0741889	0.391412	2.58456	1.59775	104.752	3.62603	4.8525	0.011418	0.11539	FALSE	66.9992	3.7173	4.1718	0.025321	0.17081	FALSE	13.9727	3.07032	2.1861	0.46906	0.81741	FALSE	71.8839	0.33959	4.4637	7.7257	2.05e-17	1.08e-16	UP	65.1657	0.30914	7.7197	4.14e-17	2.39e-16	UP	6.85271	0.310563		0.046332	0.078761	FALSE
PGSC0003DMG400009037	Multidrug resistance protein ABC transporter family protein [Source:PGSC_GENE%3BAcc:PGSC0003DMG400009037]	0.00516664	1.14632	2.11456	1.68311	0.201912	8.77145	3.58391	6.81594	197.191	13.2954	3.8906	0.0099407	0.10556	FALSE	384.026	13.6301	4.8163	0.00017779	0.0053963	UP	421.192	11.2578	5.2255	0.0003497	0.011353	UP	123.006	0.406065	7.3549	8.2428	0.00022267	0.00049663	UP	93.5547	0.371687	7.9756	1.28e-08	4.33e-08	UP	60.2699	0.36818		6.16e-16	3.25e-15	UP
PGSC0003DMG400019120	Oxidoreductase [Source:PGSC_GENE%3BAcc:PGSC0003DMG400019120]	0.0145319	3.95383	7.62573	4.28404	0.0281065	42.4617	20.9249	5.02746	752.358	1.20868	9.2818	3.53e-08	2.03e-05	UP	185.164	1.2391	7.2234	9.08e-05	0.0033004	UP	1322.75	1.02344	10.336	4.38e-09	2.86e-06	UP	290.006	0.745655	7.6445	8.6034	2.4e-63	6.46e-62	UP	155.776	0.680826	7.838	6.93e-10	2.56e-09	UP	135.812	0.678743		4.36e-19	2.69e-18	UP
PGSC0003DMG400028663	Conserved gene of unknown function [Source:PGSC_GENE%3BAcc:PGSC0003DMG400028663]	0.0255733	1.25101	3.20433	1.60972	0.544451	1.3096	1.92906	3.70494	60.6224	20.5475	1.5609	0.40117	0.7614	FALSE	119.53	21.0647	2.5045	0.074768	0.32537	FALSE	35.8323	17.3985	1.0423	0.64328	0.92065	FALSE	106.929	1.15172	5.1705	6.5367	4.85e-23	3.31e-22	UP	51.3971	1.05251	5.6098	5.28e-12	2.27e-11	UP	37.704	1.04692		0.0012669	0.002716	UP
PGSC0003DMG400024452	Pyridoxal-dependent decarboxylase%2C C-terminal sheet domain containing protein [Source:PGSC_GENE%3BAcc:PGSC0003DMG400024452]	0.0158275	0.450656	4.03382	1.51753	0	0	0.634151	0.656083	26.7353	0	Inf	0.059664	0.29969	FALSE	28.5348	0	Inf	0.030713	0.19281	FALSE	0	0	NA	NA	NA	NA	180.872	0.956571	4.3967	7.5629	4.6e-41	6.38e-40	UP	65.0905	0.866736	6.2307	4.21e-16	2.32e-15	UP	18.2549	0.866634		0.00017894	0.00042086	UP
PGSC0003DMG400020336	Conserved gene of unknown function [Source:PGSC_GENE%3BAcc:PGSC0003DMG400020336]	0.00327753	0.058951	2.85004	1.13039	0.0394922	0.0530879	1.27749	0.758393	130.544	4.8347	4.755	0.0076843	0.089232	FALSE	79.3838	4.9564	4.0015	0.021616	0.15547	FALSE	4.73125	4.09376	0.2088	1	1	FALSE	308.648	0.478286	3.7344	9.3339	4.73e-68	1.49e-66	UP	116.995	0.433368	8.0766	1.18e-29	1.21e-28	UP	5.76738	0.433317		0.077121	0.1251	FALSE
PGSC0003DMG401030517	Origin recognition complex 4 subunit [Source:PGSC_GENE%3BAcc:PGSC0003DMG401030517]	0.0161571	0.728031	3.42758	1.43043	0.0734357	2.29973	3.19948	1.36326	263.029	7.25205	5.1807	0.00078355	0.019049	UP	114.898	7.4346	3.95	0.011494	0.10383	FALSE	165.04	6.14064	4.7483	0.0055576	0.071883	FALSE	299.473	1.90312	5.0495	7.2979	5.41e-44	8.26e-43	UP	119.528	1.73247	6.1084	2.38e-26	2.12e-25	UP	57.3983	1.73319		2.6e-12	1.12e-11	UP
PGSC0003DMG400013018	Sigma factor sigb regulation protein rsbq [Source:PGSC_GENE%3BAcc:PGSC0003DMG400013018]	0.0234903	1.2724	2.16344	1.39734	0	0.856365	5.63304	0.53108	330.519	0	Inf	2.87e-06	0.00040629	UP	32.0267	0	Inf	0.023731	0.16476	FALSE	43.8346	0	Inf	0.015317	0.13552	FALSE	134.577	1.96959	5.3177	6.0944	2.89e-11	1.08e-10	UP	83.0617	1.79502	5.5321	3.29e-18	2.01e-17	UP	71.4206	1.7908		4.53e-11	1.81e-10	UP
PGSC0003DMG400025304	DNA-binding protein MNB1B [Source:PGSC_GENE%3BAcc:PGSC0003DMG400025304]	0.0208583	0.260967	23.7221	9.23152	0.397129	0.285598	20.2001	7.49727	923.339	21.7562	5.4074	1.2e-05	0.0011269	UP	351.745	22.3038	3.9792	0.0011622	0.021289	UP	11.3727	18.4219	-0.69585	0.54038	0.86044	FALSE	1149.63	1.36264	3.2098	9.7206	2.26e-165	5.96e-163	UP	427.302	1.23842	8.4306	7.72e-44	1.42e-42	UP	11.4249	1.23481		0.12407	0.1919	FALSE
Novel01970	PREDICTED: protein TRANSPARENT TESTA 12-like [Solanum tuberosum]	0.018565	2.64342	3.94815	1.39541	0.157096	6.72507	8.53294	4.01288	435.632	9.6694	5.4935	9.78e-05	0.0046364	UP	211.397	9.9128	4.4145	0.0016387	0.027182	UP	299.353	8.18752	5.1923	0.00080866	0.020584	UP	214.93	1.36264	6.7172	7.3013	5.69e-47	9.6e-46	UP	72.7212	1.23842	5.8758	3.99e-17	2.31e-16	UP	129.918	1.23481		3.68e-31	3.87e-30	UP
Novel02409	PREDICTED: intracellular ribonuclease LX-like [Solanum tuberosum]	0.00998052	1.96645	2.21797	2.61888	0.248205	1.82313	2.51508	5.23655	71.2435	8.46073	3.0739	0.10247	0.40173	FALSE	152.945	8.6737	4.1402	0.0053761	0.062465	FALSE	44.6494	7.16408	2.6398	0.19697	0.55953	FALSE	66.8746	0.406065	7.1838	7.3636	2.73e-16	1.35e-15	UP	75.4892	0.371687	7.666	1.15e-19	7.5e-19	UP	53.5298	0.36818		3.74e-14	1.79e-13	UP
PGSC0003DMG400020258	Blue copper protein [Source:PGSC_GENE%3BAcc:PGSC0003DMG400020258]	0.0240239	0.0640688	2.43046	3.54744	0.0853501	0.505573	13.7698	11.9574	326.071	2.41735	7.0756	3.31e-05	0.002209	UP	289.56	2.4782	6.8684	1.67e-05	0.00098327	UP	10.5031	2.04688	2.3593	0.51129	0.84044	FALSE	60.88	0.81213	0.97697	6.2281	4.88e-14	2.14e-13	UP	85.1054	0.743373	6.839	1.95e-16	1.09e-15	UP	1.44939	0.736359		0.86409	0.96452	FALSE
PGSC0003DMG400013176	DUF26 domain-containing protein 2 [Source:PGSC_GENE%3BAcc:PGSC0003DMG400013176]	0.012743	1.12782	1.51685	1.26982	0	0.826035	0.797213	0.250623	39.0423	0	Inf	0.026795	0.19344	FALSE	12.3748	0	Inf	0.14717	0.46745	FALSE	35.3589	0	Inf	0.02678	0.19199	FALSE	78.0698	0.884351	6.0309	6.464	5.53e-18	2.99e-17	UP	62.4441	0.805055	6.2773	1.57e-15	8.41e-15	UP	52.4069	0.801497		4.88e-13	2.2e-12	UP
PGSC0003DMG400019471	Cytochrome P450 [Source:PGSC_GENE%3BAcc:PGSC0003DMG400019471]	0.00349509	0.0453167	0.614184	1.67092	0.103864	0.930516	7.09744	3.37019	481.604	8.46073	5.8309	3.94e-05	0.0024979	UP	235.234	8.6737	4.7613	0.00069838	0.014909	UP	54.8588	7.16408	2.9369	0.13489	0.46387	FALSE	44.2774	0.33959	3.2484	7.0266	4.7e-09	1.53e-08	UP	115.055	0.30914	8.5398	6.25e-17	3.58e-16	UP	2.95136	0.310563		0.3608	0.48688	FALSE
PGSC0003DMG400023547	ZPT2-14 [Source:PGSC_GENE%3BAcc:PGSC0003DMG400023547]	0.0102712	0.647088	2.06491	1.56091	0.0928211	3.57135	3.53616	5.35456	114.867	3.62603	4.9854	0.0082736	0.093401	FALSE	179.437	3.7173	5.5931	0.00051277	0.011859	UP	101.283	3.07032	5.0439	0.010204	0.10562	FALSE	71.3427	0.478286	5.5411	7.2207	2.06e-17	1.08e-16	UP	51.5677	0.433368	6.8947	1.26e-13	5.99e-13	UP	20.1759	0.433317		0.0025193	0.0052141	UP
PGSC0003DMG400006235	Gamma-gliadin [Source:PGSC_GENE%3BAcc:PGSC0003DMG400006235]	0.0138975	0.241511	2.33407	1.98209	0.09062	6.6943	5.59646	15.4522	249.857	4.8347	5.6915	0.00048261	0.013843	UP	706.821	4.9564	7.1559	1.63e-07	3.34e-05	UP	261.543	4.09376	5.9975	0.00041325	0.012686	UP	110.021	0.884351	3.682	6.9589	9.85e-05	0.00022709	UP	89.2079	0.805055	6.7919	3.64e-07	1.09e-06	UP	10.2873	0.801497		0.013784	0.025754	UP
PGSC0003DMG400028633	WRKYd transcription factor [Source:PGSC_GENE%3BAcc:PGSC0003DMG400028633]	0.00726411	1.57276	1.47175	1.23903	0	3.28349	6.49804	3.35306	254.248	0	Inf	1.5e-05	0.0012778	UP	134.037	0	Inf	0.00013217	0.0043527	UP	111.879	0	Inf	0.0008081	0.020584	UP	60.9776	0.406065	7.32	7.2304	7.36e-15	3.38e-14	UP	49.0748	0.371687	7.0448	5.78e-13	2.65e-12	UP	58.832	0.36818		1.47e-15	7.56e-15	UP
PGSC0003DMG400024634	70 kDa subunit of replication protein A [Source:PGSC_GENE%3BAcc:PGSC0003DMG400024634]	0.067444	0.247753	15.9182	6.49288	0.123527	0.383807	9.75513	6.19498	1192.04	18.1301	6.0389	1.52e-06	0.0002525	UP	777.741	18.5865	5.387	5.51e-06	0.00043415	UP	40.6267	15.3516	1.404	0.50674	0.83694	FALSE	2066.76	11.809	1.4326	7.4513	5.37e-103	3.92e-101	UP	805.718	10.7664	6.2257	2.18e-110	2.63e-108	UP	29.0436	10.7597		0.10664	0.16773	FALSE
PGSC0003DMG400014867	Peroxidase [Source:PGSC_GENE%3BAcc:PGSC0003DMG400014867]	1.15163	24.354	73.4925	191.384	1.92025	39.9986	96.1282	143.426	6681.06	160.754	5.3772	4.8e-05	0.0027732	UP	10282.3	164.8	5.9633	3.76e-05	0.0017498	UP	2417.02	136.118	4.1503	0.0004363	0.013186	UP	5443.72	114.974	3.963	5.5652	2.34e-29	2.08e-28	UP	13539.4	104.553	7.0168	4.31e-71	1.93e-69	UP	1627.99	104.392		9.49e-122	1.4e-119	UP
PGSC0003DMG400003384	Origin-recognition complex subunit 6 [Source:PGSC_GENE%3BAcc:PGSC0003DMG400003384]	0.0192052	0.172425	12.1472	4.18928	0	0.464139	6.43303	3.79258	382.826	0	Inf	1.08e-06	0.00020348	UP	231.782	0	Inf	6e-06	0.00046151	UP	23.9594	0	Inf	0.053103	0.28391	FALSE	767.7	1.63575	2.7251	8.8744	8.99e-56	1.95e-54	UP	253.162	1.48502	7.4134	5.31e-55	1.45e-53	UP	9.83724	1.48776		0.049004	0.082894	FALSE
PGSC0003DMG400016524	Avr9/Cf-9 rapidly elicited protein 146 [Source:PGSC_GENE%3BAcc:PGSC0003DMG400016524]	0.013983	0.678166	1.83059	0.921314	0.273227	2.21989	3.91839	2.49682	158.909	13.2954	3.5792	0.021226	0.16864	FALSE	104.194	13.6301	2.9344	0.051328	0.26283	FALSE	78.1547	11.2578	2.7954	0.112	0.42457	FALSE	78.769	0.81213	5.1613	6.5998	3.04e-18	1.66e-17	UP	37.9879	0.743373	5.6753	2.71e-09	9.63e-09	UP	26.351	0.736359		1.96e-06	5.54e-06	UP
PGSC0003DMG400025261	Histone H3.2 [Source:PGSC_GENE%3BAcc:PGSC0003DMG400025261]	0.225205	0.911012	16.0744	32.018	0.7687	0.893033	19.2902	20.6602	583.551	27.7995	4.3917	0.00039406	0.012076	UP	639.73	28.4993	4.4885	8.93e-05	0.0032758	UP	23.4098	23.5391	-0.0079485	0.87494	1	FALSE	514.115	9.71502	1.5732	5.7257	7.55e-82	3.35e-80	UP	979.157	8.85001	6.7897	2.6e-132	5.3e-130	UP	26.3016	8.83878		0.0293	0.051885	FALSE
PGSC0003DMG400035647	Disease resistance response protein [Source:PGSC_GENE%3BAcc:PGSC0003DMG400035647]	0.0099596	0.275094	1.40776	2.44793	2.40608	0.575739	5.88818	3.63782	167.13	82.1899	1.0239	0.46045	0.79817	FALSE	104.782	84.2588	0.3145	0.8493	1	FALSE	14.231	69.5939	-2.2899	0.075234	0.34586	FALSE	42.5443	0.406065	4.347	6.7111	2.04e-10	7.25e-10	UP	70.7684	0.371687	7.5729	1.96e-18	1.21e-17	UP	7.49263	0.36818		0.032283	0.056699	FALSE
PGSC0003DMG400007858	Conserved gene of unknown function [Source:PGSC_GENE%3BAcc:PGSC0003DMG400007858]	0.011231	0.0232486	2.52154	3.79968	0.199503	0.24542	2.89097	3.34273	73.1651	6.04338	3.5977	0.062127	0.30648	FALSE	86.6468	6.1955	3.8059	0.022918	0.16081	FALSE	5.45734	5.1172	0.092842	1	1	FALSE	67.6118	0.406065	0.61245	7.3794	8.18e-07	2.27e-06	UP	97.1509	0.371687	8.03	4.6e-14	2.26e-13	UP	0.562893	0.36818		1	1	FALSE
PGSC0003DMG400024240	Gene of unknown function [Source:PGSC_GENE%3BAcc:PGSC0003DMG400024240]	0.0041783	0.0479785	0.753186	0.650689	0.0445329	0.230424	2.44605	3.97353	165.164	3.62603	5.5094	0.0019888	0.035563	UP	277.474	3.7173	6.222	4.54e-05	0.0019901	UP	13.8254	3.07032	2.1709	0.48822	0.82229	FALSE	54.2581	0.406065	3.0844	7.062	3.32e-13	1.39e-12	UP	44.8337	0.371687	6.9144	7.95e-12	3.37e-11	UP	3.12298	0.36818		0.31641	0.43461	FALSE
PGSC0003DMG400009724	Conserved gene of unknown function [Source:PGSC_GENE%3BAcc:PGSC0003DMG400009724]	0.00235651	0.198764	0.878653	0.531725	0.150696	0.107735	0.521693	0.355449	62.3043	21.7562	1.5179	0.40927	0.7614	FALSE	43.9422	22.3038	0.97832	0.60465	0.90019	FALSE	11.3018	18.4219	-0.70487	0.54035	0.86044	FALSE	112.213	0.406065	5.9593	8.1103	7.01e-27	5.66e-26	UP	64.8812	0.371687	7.4476	1.42e-11	5.94e-11	UP	22.9076	0.36818		3.84e-06	1.06e-05	UP
PGSC0003DMG402023841	Sterol desaturase [Source:PGSC_GENE%3BAcc:PGSC0003DMG402023841]	0.123556	2.1322	16.7692	48.9295	0.0638281	0.105126	0.325602	2.27683	35.7018	8.46073	2.0771	0.35607	0.72823	FALSE	256.226	8.6737	4.8846	0.00045309	0.01086	UP	10.0036	7.16408	0.48166	1	1	FALSE	1967.15	19.5323	3.6691	6.6541	8.41e-17	4.28e-16	UP	5480.82	17.7647	8.2692	1.59e-80	9.14e-79	UP	225.704	17.7429		5.85e-13	2.62e-12	UP
PGSC0003DMG400000530	Leaf senescence protein [Source:PGSC_GENE%3BAcc:PGSC0003DMG400000530]	0.0120182	0.0836753	1.04798	1.31629	0.176322	0.47781	2.25827	2.50475	115.436	10.8781	3.4076	0.040981	0.243	FALSE	132.464	11.1519	3.5702	0.0155	0.12564	FALSE	21.3259	9.21096	1.2112	0.64755	0.92347	FALSE	57.1997	0.884351	2.3627	6.0152	4.65e-13	1.94e-12	UP	68.6554	0.805055	6.4141	5.04e-17	2.91e-16	UP	4.12243	0.801497		0.28585	0.39908	FALSE
PGSC0003DMG400009913	Conserved gene of unknown function [Source:PGSC_GENE%3BAcc:PGSC0003DMG400009913]	0.0222768	0.535785	1.72245	4.08788	0.0985287	2.0949	5.53581	3.0954	282.755	6.04338	5.5481	0.00037425	0.011566	UP	162.55	6.1955	4.7135	0.0020764	0.031853	UP	93.5595	5.1172	4.1925	0.025259	0.18478	FALSE	93.4713	1.63001	4.1483	5.8416	9.62e-20	5.63e-19	UP	211.988	1.48588	7.1565	4.56e-47	9.35e-46	UP	26.2485	1.48024		1.55e-05	4.07e-05	UP
PGSC0003DMG400026457	Conserved gene of unknown function [Source:PGSC_GENE%3BAcc:PGSC0003DMG400026457]	0.0168017	0.0545633	1.55839	1.96898	0.133952	0.196085	1.90679	1.98963	86.0018	7.25205	3.5679	0.052992	0.28054	FALSE	92.203	7.4346	3.6325	0.02546	0.17138	FALSE	7.53804	6.14064	0.2958	1	1	FALSE	74.6352	1.08524	1.2552	6.1038	2.65e-16	1.31e-15	UP	90.3781	0.989966	6.5124	1.91e-12	8.44e-12	UP	2.3614	0.989306		0.73993	0.86514	FALSE
PGSC0003DMG400029934	Sphingolipid delta-8 desaturase [Source:PGSC_GENE%3BAcc:PGSC0003DMG400029934]	0.00540501	0.343612	0.454729	1.38198	0.15681	0.380746	1.47004	1.16904	141.131	18.1301	2.9606	0.054432	0.28417	FALSE	115.958	18.5865	2.6413	0.064286	0.29796	FALSE	31.8616	15.3516	1.0534	0.65716	0.92752	FALSE	46.5105	0.745655	5.5464	5.9629	1.34e-10	4.81e-10	UP	134.988	0.680826	7.6313	1.83e-19	1.18e-18	UP	31.7198	0.678743		8.56e-08	2.71e-07	UP
PGSC0003DMG400008308	DNA replication licensing factor MCM3 [Source:PGSC_GENE%3BAcc:PGSC0003DMG400008308]	0.194043	1.12514	31.646	11.3843	0.729348	2.47038	19.8524	10.1175	2326.68	102.737	4.5012	7.66e-05	0.003897	UP	1217.95	105.324	3.5316	0.00048097	0.011361	UP	251.516	86.9924	1.5317	0.23675	0.60529	FALSE	3943.02	32.5982	2.097	6.9184	1.55e-294	4.95e-291	UP	1355.74	29.6529	5.5148	3.69e-110	4.43e-108	UP	126.599	29.5925		0.0010963	0.0023674	UP
PGSC0003DMG400012774	Conserved gene of unknown function [Source:PGSC_GENE%3BAcc:PGSC0003DMG400012774]	0.0112454	0.512416	2.30583	4.36815	0.2175	8.71912	10.1833	10.0424	470.16	12.0868	5.2817	0.0001149	0.0051118	UP	477.049	12.391	5.2668	3.24e-05	0.0015732	UP	349.472	10.2344	5.0937	0.00062322	0.01727	UP	113.353	0.745655	5.0656	7.2481	5.49e-26	4.27e-25	UP	205.425	0.680826	8.2371	9.18e-48	1.93e-46	UP	22.7301	0.678743		1.55e-05	4.05e-05	UP
Novel01295	--	0.0218013	0.393983	4.7159	2.22524	0.394038	1.02403	5.48979	1.90115	83.7313	7.25205	3.5293	0.056819	0.29129	FALSE	30.0218	7.4346	2.0137	0.32053	0.6896	FALSE	13.5469	6.14064	1.1415	0.70928	0.95478	FALSE	76.8255	0.478286	3.7368	7.3276	2.39e-07	6.9e-07	UP	34.7949	0.433368	6.3271	0.00013351	0.00031456	UP	5.77689	0.433317		0.18693	0.27616	FALSE
PGSC0003DMG400002791	Conserved gene of unknown function [Source:PGSC_GENE%3BAcc:PGSC0003DMG400002791]	0.0126816	0.179187	1.59189	1.84572	0.107674	0.46032	2.32665	3.65206	87.0826	4.8347	4.1709	0.029607	0.20396	FALSE	140.623	4.9564	4.8264	0.0027108	0.038393	UP	14.9692	4.09376	1.8705	0.51728	0.84444	FALSE	63.1956	0.679179	3.3714	6.5399	8.2e-11	2.98e-10	UP	70.0313	0.618279	6.8236	6.86e-14	3.33e-13	UP	6.42813	0.621126		0.10038	0.15887	FALSE
PGSC0003DMG400012143	ATP binding protein [Source:PGSC_GENE%3BAcc:PGSC0003DMG400012143]	0.0190053	0.94578	1.23811	2.70888	0	3.72829	4.05783	2.62475	273.104	0	Inf	9.78e-06	0.00096712	UP	181.204	0	Inf	2.62e-05	0.0013583	UP	217.84	0	Inf	4.31e-05	0.0025138	UP	88.4577	1.8309	5.1925	5.5944	2.13e-16	1.06e-15	UP	184.891	1.67079	6.79	3.17e-40	5.08e-39	UP	60.9947	1.66805		3.55e-13	1.61e-12	UP
Novel03393	Chain A, Structure Of Green-type Rubisco Activase From Tobacco>gi|356624733|pdb|3ZW6|A Chain A, Model Of Hexameric Aaa Domain Arrangement Of Green-Type Rubisco Activase From Tobacco.>gi|356624734|pdb|3ZW6|B Chain B, Model Of Hexameric Aaa Domain Arrangement Of Green-Type Rubisco Activase From Tobacco.>gi|356624735|pdb|3ZW6|C Chain C, Model Of Hexameric Aaa Domain Arrangement Of Green-Type Rubisco…	0.0126012	0.770356	8.48648	2.46359	0	0.0420346	2.61225	0.991896	49.142	0	Inf	0.015373	0.13929	FALSE	19.2282	0	Inf	0.068957	0.3101	FALSE	0.694294	0	Inf	1	1	FALSE	169.588	0.33959	5.484	8.964	8.55e-40	1.14e-38	UP	47.1303	0.30914	7.2523	1.92e-12	8.47e-12	UP	13.8994	0.310563		0.00080417	0.001764	UP
Novel02473	PREDICTED: LOB domain-containing protein 11-like [Solanum tuberosum]	0.0128655	0.810238	2.09598	2.21534	0.0387554	8.12804	3.50365	2.15891	90.7487	1.20868	6.2304	0.0061044	0.076591	FALSE	57.6031	1.2391	5.5388	0.01227	0.1083	FALSE	185.245	1.02344	7.4999	0.00030524	0.010341	UP	57.8244	0.478286	5.5411	6.9177	1.19e-09	4.04e-09	UP	58.3911	0.433368	7.074	2.33e-15	1.23e-14	UP	20.1757	0.433317		1.9e-05	4.93e-05	UP
PGSC0003DMG400021519	Cyclin A [Source:PGSC_GENE%3BAcc:PGSC0003DMG400021519]	0.00399639	0.00738666	2.16775	0.994917	0.108346	0.0461677	0.765011	0.521037	63.9902	10.8781	2.5564	0.1722	0.52351	FALSE	44.6947	11.1519	2.0028	0.25828	0.61879	FALSE	3.35571	9.21096	-1.4567	0.37954	0.76023	FALSE	192.577	0.478286	0.449	8.6533	3.15e-26	2.48e-25	UP	84.4141	0.433368	7.6057	6.79e-22	4.92e-21	UP	0.59152	0.433317		1	1	FALSE
PGSC0003DMG400002943	Microsomal omega-6-desaturase [Source:PGSC_GENE%3BAcc:PGSC0003DMG400002943]	0.0124856	0.86963	2.02303	3.56666	0.633914	5.32474	19.4016	12.9585	1476.8	58.0164	4.6699	4.42e-05	0.0026557	UP	1013.22	59.4768	4.0905	0.00010961	0.0037812	UP	352.279	49.1251	2.8422	0.029028	0.20124	FALSE	163.932	1.36264	5.6857	6.9106	4.76e-05	0.00011313	UP	275.389	1.23842	7.7968	9.19e-13	4.16e-12	UP	63.5596	1.23481		4.55e-15	2.29e-14	UP
PGSC0003DMG400008610	Histone H3.2 [Source:PGSC_GENE%3BAcc:PGSC0003DMG400008610]	0.0113267	0.185088	6.45228	3.58998	0.192342	0.0855706	5.5752	2.61537	117.439	4.8347	4.6023	0.01119	0.11402	FALSE	56.3237	4.9564	3.5064	0.057243	0.27851	FALSE	1.54253	4.09376	-1.4081	0.51185	0.84044	FALSE	143.517	0.33959	3.5808	8.7232	2.09e-18	1.15e-17	UP	76.2257	0.30914	7.9459	6.98e-20	4.6e-19	UP	3.71606	0.310563		0.28247	0.39501	FALSE
PGSC0003DMG400006589	Conserved gene of unknown function [Source:PGSC_GENE%3BAcc:PGSC0003DMG400006589]	0.0227167	0.440041	3.15963	1.18246	0.135821	0.427029	1.66669	1.06585	184.683	18.1301	3.3486	0.022686	0.176	FALSE	121.572	18.5865	2.7095	0.055058	0.27447	FALSE	41.268	15.3516	1.4266	0.47763	0.81741	FALSE	373.08	3.61537	3.8391	6.6892	9.4e-72	3.24e-70	UP	133.468	3.28104	5.3462	1.83e-27	1.72e-26	UP	46.9207	3.27864		3.05e-07	9.23e-07	UP
PGSC0003DMG400031513	Extensin (ext) [Source:PGSC_GENE%3BAcc:PGSC0003DMG400031513]	0.0213959	0.208854	2.95175	2.2634	0	0.246537	3.24861	2.60337	122.047	0	Inf	0.00062924	0.016307	UP	100.826	0	Inf	0.00050393	0.01172	UP	8.06823	0	Inf	0.27727	0.65577	FALSE	118.485	1.15746	2.8436	6.6776	1.61e-14	7.27e-14	UP	86.7952	1.05165	6.3669	1.36e-20	9.32e-20	UP	7.56901	1.05444		0.088108	0.14131	FALSE
PGSC0003DMG400012972	Conserved gene of unknown function [Source:PGSC_GENE%3BAcc:PGSC0003DMG400012972]	0.0078308	0.04407	1.46661	0.857104	0	0	0	0	0	0	NA	NA	NA	NA	0	0	NA	NA	NA	NA	0	0	NA	NA	NA	NA	66.4529	0.478286	2.0558	7.1183	1.46e-13	6.24e-13	UP	37.087	0.433368	6.4192	6.62e-10	2.45e-09	UP	1.80163	0.433317		0.61804	0.75332	FALSE
PGSC0003DMG400008876	Nucleic acid-binding%2C OB-fold [Source:PGSC_GENE%3BAcc:PGSC0003DMG400008876]	0.0167221	0.322517	7.07615	3.13579	0	0.77962	6.53468	3.517	186.377	0	Inf	8.52e-05	0.0042376	UP	102.563	0	Inf	0.00048769	0.011508	UP	19.2628	0	Inf	0.080579	0.36067	FALSE	213.209	0.679179	3.8211	8.2943	2.37e-24	1.71e-23	UP	90.2812	0.618279	7.19	2.82e-22	2.08e-21	UP	8.77897	0.621126		0.23928	0.34243	FALSE
PGSC0003DMG400024725	Deoxyuridine 5'-triphosphate nucleotidohydrolase [Source:PGSC_GENE%3BAcc:PGSC0003DMG400024725]	0.0975181	0.469903	25.1953	9.00004	0.301008	1.86956	15.6857	8.57705	735.745	16.9215	5.4423	2.02e-05	0.0015682	UP	412.051	17.3474	4.57	0.00022565	0.0064613	UP	76.0083	14.3282	2.4073	0.16953	0.52142	FALSE	1253.14	6.53726	1.8274	7.5827	3.76e-55	7.97e-54	UP	427.603	5.94093	6.1694	9.71e-56	2.71e-54	UP	21.0938	5.94352		0.022237	0.040203	UP
PGSC0003DMG400008124	Structural constituent of cell wall [Source:PGSC_GENE%3BAcc:PGSC0003DMG400008124]	0.0094405	1.19259	1.55091	1.00505	0	0.165	0.636474	0.269626	22.5894	0	Inf	0.078455	0.34548	FALSE	9.846	0	Inf	0.20214	0.54741	FALSE	5.12976	0	Inf	0.4368	0.80501	FALSE	58.3221	0.478286	6.5451	6.93	3.44e-14	1.52e-13	UP	36.0902	0.433368	6.3799	1.09e-09	3.97e-09	UP	40.466	0.433317		9.88e-11	3.88e-10	UP
PGSC0003DMG400006237	Gamma-gliadin [Source:PGSC_GENE%3BAcc:PGSC0003DMG400006237]	0.0422419	0.699187	7.06261	4.47449	0.0837617	5.91307	7.66262	19.7037	277.596	3.62603	6.2585	0.00016619	0.0065611	UP	730.587	3.7173	7.6187	6.03e-08	1.65e-05	UP	187.739	3.07032	5.9342	0.0010878	0.024995	UP	270.14	2.18051	3.6119	6.9529	6.53e-06	1.68e-05	UP	163.724	1.98093	6.3689	4.64e-36	6.22e-35	UP	24.1922	1.97869		0.010492	0.019933	UP
PGSC0003DMG400024309	Conserved gene of unknown function [Source:PGSC_GENE%3BAcc:PGSC0003DMG400024309]	0.253609	3.313	30.9918	10.9507	0.302659	4.95296	16.507	10.3825	1753.69	38.6776	5.5028	4.62e-06	0.00057711	UP	1133.07	39.6512	4.8367	1.15e-05	0.00072698	UP	457.655	32.7501	3.8047	0.003545	0.053809	FALSE	3503.69	38.6592	3.2651	6.5019	4.89e-120	4.89e-118	UP	1183.17	35.2151	5.0703	9.06e-109	1.05e-106	UP	338.085	35.1673		1.73e-12	7.53e-12	UP
PGSC0003DMG400009080	Triacylglycerol lipase [Source:PGSC_GENE%3BAcc:PGSC0003DMG400009080]	0.00935381	1.0035	1.21938	1.36213	0.0281769	1.52821	1.21714	0.980589	43.3604	1.20868	5.1649	0.049081	0.27091	FALSE	36.0812	1.2391	4.8639	0.043128	0.23764	FALSE	47.4195	1.02344	5.534	0.0305	0.20755	FALSE	46.2551	0.478286	6.311	6.5956	1.96e-11	7.44e-11	UP	49.3558	0.433368	6.8315	4.46e-13	2.06e-12	UP	34.4039	0.433317		0.00086341	0.0018871	UP
PGSC0003DMG400023522	Histone H4 [Source:PGSC_GENE%3BAcc:PGSC0003DMG400023522]	0.0156071	0.0151505	1.30955	3.46636	0.0470139	0.0369413	5.76175	4.89674	123.549	1.20868	6.6755	0.0018772	0.034261	UP	107.764	1.2391	6.4424	0.0012734	0.022548	UP	0.694294	1.02344	-0.55981	0.92422	1	FALSE	29.7921	0.478286	-0.48281	5.9609	2.61e-07	7.51e-07	UP	75.335	0.433368	7.4416	1.11e-19	7.25e-19	UP	0.310073	0.433317		1	1	FALSE
Novel01039	PREDICTED: glycine-rich cell wall structural protein-like [Solanum tuberosum]	0.0134087	0.200765	3.09916	2.14485	0	0	0	0	0	0	NA	NA	NA	NA	0	0	NA	NA	NA	NA	0	0	NA	NA	NA	NA	58.1662	0.33959	3.4551	7.4202	2.27e-09	7.55e-09	UP	38.5205	0.30914	6.9612	2.92e-10	1.11e-09	UP	3.40598	0.310563		0.37048	0.49716	FALSE
PGSC0003DMG400000060	Transferase%2C transferring glycosyl groups [Source:PGSC_GENE%3BAcc:PGSC0003DMG400000060]	0.00376484	0.30679	1.87933	0.520761	0.111881	1.78974	3.07287	3.10314	193.821	8.46073	4.5178	0.0043162	0.060989	FALSE	201.084	8.6737	4.535	0.0016527	0.027339	UP	99.0137	7.16408	3.7888	0.034059	0.2222	FALSE	125.552	0.33959	5.8996	8.5303	0.00021017	0.00046961	UP	33.2679	0.30914	6.7497	6.79e-09	2.34e-08	UP	18.5393	0.310563		0.00013228	0.00031542	UP
PGSC0003DMG400018341	Conserved gene of unknown function [Source:PGSC_GENE%3BAcc:PGSC0003DMG400018341]	0.285336	1.09256	35.6678	11.8324	0.261674	2.48711	15.8838	11.748	672.2	13.2954	5.6599	1.66e-05	0.0013754	UP	510.502	13.6301	5.227	2.91e-05	0.0014648	UP	91.0236	11.2578	3.0153	0.077982	0.35436	FALSE	1603.33	17.2896	1.4973	6.535	6.33e-63	1.69e-61	UP	508.258	15.7231	5.0146	3.66e-71	1.64e-69	UP	44.3221	15.6992		0.05323	0.08936	FALSE
PGSC0003DMG400031371	Nucleic acid binding protein [Source:PGSC_GENE%3BAcc:PGSC0003DMG400031371]	0.0845453	0.828224	10.6872	3.1285	0.151978	1.60107	5.92076	2.5744	352.567	10.8781	5.0184	0.00043593	0.012996	UP	157.768	11.1519	3.8224	0.0078837	0.080754	FALSE	82.8037	9.21096	3.1683	0.074762	0.34466	FALSE	676.714	7.21643	2.8503	6.5511	2.32e-83	1.07e-81	UP	189.47	6.55921	4.8523	6.28e-33	7.36e-32	UP	47.3425	6.56464		0.0081063	0.015689	UP
PGSC0003DMG400013449	SNF2 domain-containing protein [Source:PGSC_GENE%3BAcc:PGSC0003DMG400013449]	0.0203135	0.066797	3.20935	0.849468	0.0194139	0.12361	2.46264	1.13789	510.829	4.8347	6.7233	6.74e-06	0.00076573	UP	242.17	4.9564	5.6106	0.00017692	0.0053893	UP	22.4722	4.09376	2.4566	0.34007	0.72239	FALSE	707.083	6.03599	1.2764	6.8721	4.7e-63	1.25e-61	UP	179.095	5.51102	5.0223	1.78e-32	2.05e-31	UP	13.2751	5.48012		0.18958	0.27945	FALSE
Novel00946	PREDICTED: uncharacterized protein LOC104106668 [Nicotiana tomentosiformis]>gi|697119217|ref|XP_009613558.1| PREDICTED: uncharacterized protein LOC104106668 [Nicotiana tomentosiformis]>gi|697119219|ref|XP_009613559.1| PREDICTED: uncharacterized protein LOC104106668 [Nicotiana tomentosiformis]	0.0127365	0.444383	1.99626	2.00568	0	0.916546	1.47949	0.688345	32.6223	0	Inf	0.039459	0.23755	FALSE	15.7674	0	Inf	0.098838	0.3784	FALSE	17.7145	0	Inf	0.092829	0.38392	FALSE	47.1575	0.406065	4.6854	6.8596	1.31e-11	4.99e-11	UP	45.2644	0.371687	6.9281	2.44e-11	1e-10	UP	9.47317	0.36818		0.0103	0.019595	UP
PGSC0003DMG403013782	Replication factor A [Source:PGSC_GENE%3BAcc:PGSC0003DMG403013782]	0.191625	0.658319	22.1892	7.91974	0.109954	1.52278	14.7064	5.22638	943.023	8.46073	6.8004	4.98e-07	0.00011349	UP	343.672	8.6737	5.3082	8.8e-05	0.0032411	UP	84.7364	7.16408	3.5641	0.049612	0.27364	FALSE	1510.33	17.5814	1.3392	6.4247	2.5e-100	1.74e-98	UP	515.185	15.9644	5.0122	2.69e-44	5.06e-43	UP	40.4567	15.9897		0.073109	0.1192	FALSE
PGSC0003DMG400029078	DNA binding protein [Source:PGSC_GENE%3BAcc:PGSC0003DMG400029078]	0.0468942	0.415183	5.0521	1.60312	0	0.233919	0.88159	0.663868	27.601	0	Inf	0.054523	0.2844	FALSE	21.4602	0	Inf	0.058417	0.28142	FALSE	6.36984	0	Inf	0.34215	0.72337	FALSE	169.016	2.11404	2.7051	6.321	5.27e-25	3.92e-24	UP	51.2982	1.91838	4.7409	8.03e-11	3.18e-10	UP	12.5271	1.92108		0.022978	0.041442	UP
PGSC0003DMG400008544	Carbohydrate esterase [Source:PGSC_GENE%3BAcc:PGSC0003DMG400008544]	0.0067424	2.42852	1.1825	0.606278	0	2.3886	1.16177	0.258249	57.3688	0	Inf	0.010015	0.10595	FALSE	13.019	0	Inf	0.13185	0.44158	FALSE	102.841	0	Inf	0.001081	0.024935	UP	62.2745	0.478286	8.0569	7.0246	1.11e-12	4.52e-12	UP	30.5086	0.433368	6.1375	3.3e-08	1.08e-07	UP	115.395	0.433317		1.55e-21	1.07e-20	UP
PGSC0003DMG400013516	Polygalacturonase [Source:PGSC_GENE%3BAcc:PGSC0003DMG400013516]	0.0250695	0.0495923	5.14836	11.3335	15.4213	6.59592	36.8649	79.952	2678.1	1330.75	1.009	0.3043	0.67955	FALSE	5862.14	1364.25	2.1033	0.046783	0.24944	FALSE	409.316	1126.81	-1.461	0.078231	0.35515	FALSE	392.896	2.58083	0.54768	7.2502	1.09e-10	3.94e-10	UP	829.342	2.35348	8.461	7.26e-14	3.52e-13	UP	3.41952	2.33935		0.76293	0.88418	FALSE
PGSC0003DMG400016505	Helicase [Source:PGSC_GENE%3BAcc:PGSC0003DMG400016505]	0.00492756	0.603011	1.26677	0.431855	0.00580398	0.559845	1.09312	0.357661	189.335	1.20868	7.2914	0.00026724	0.0091387	UP	63.672	1.2391	5.6833	0.0092832	0.090204	FALSE	84.1631	1.02344	6.3617	0.0061025	0.075999	FALSE	233.395	1.22394	6.4945	7.5751	1.19e-42	1.74e-41	UP	76.0196	1.11419	6.0923	4.92e-18	2.97e-17	UP	100.272	1.11206		4.27e-24	3.31e-23	UP
PGSC0003DMG400019268	Organic cation transporter [Source:PGSC_GENE%3BAcc:PGSC0003DMG400019268]	0.0082648	0.42721	1.92658	0.636846	0.0205829	0.146642	3.42813	1.40609	335.604	2.41735	7.1172	2.68e-05	0.0019044	UP	142.134	2.4782	5.8418	0.00079602	0.016488	UP	12.4449	2.04688	2.6041	0.42017	0.79219	FALSE	200.162	1.15746	5.2481	7.4341	1.14e-43	1.73e-42	UP	63.2852	1.05165	5.9111	6.36e-15	3.29e-14	UP	40.0726	1.05444		1.33e-05	3.5e-05	UP
PGSC0003DMG401023841	Sterol desaturase [Source:PGSC_GENE%3BAcc:PGSC0003DMG401023841]	0.0081202	0.236796	3.45369	7.80903	0	0	0.020977	0.110215	0.873247	0	Inf	1	1	FALSE	4.64435	0	Inf	0.47077	0.80544	FALSE	0	0	NA	NA	NA	NA	151.022	0.478286	4.4289	8.3027	2.26e-10	7.98e-10	UP	326.55	0.433368	9.5575	3.3e-67	1.29e-65	UP	9.3333	0.433317		0.011365	0.021466	UP
PGSC0003DMG400027767	Alcohol dehydrogenase [Source:PGSC_GENE%3BAcc:PGSC0003DMG400027767]	0.00651504	0.0360583	0.623225	0.866947	1.62892	0.0934365	0.904477	0.788061	46.4477	100.32	-1.1109	0.30931	0.683	FALSE	41.4966	102.845	-1.3094	0.21005	0.55678	FALSE	4.08723	84.9455	-4.3773	0.0024597	0.042697	DOWN	33.9497	0.478286	2.0327	6.1494	2.16e-08	6.73e-08	UP	45.1775	0.433368	6.7039	5.58e-12	2.39e-11	UP	1.773	0.433317		0.6211	0.75631	FALSE
PGSC0003DMG400004975	Phosphopentothenoylcysteine decarboxylase [Source:PGSC_GENE%3BAcc:PGSC0003DMG400004975]	0.00539243	0.358477	0.676447	0.669995	0.0957887	0.601277	0.482436	0.272204	25.3601	6.04338	2.0691	0.40367	0.7614	FALSE	14.707	6.1955	1.2472	0.66676	0.93648	FALSE	27.4299	5.1172	2.4223	0.29197	0.66936	FALSE	37.7417	0.406065	5.6167	6.5383	2.45e-09	8.13e-09	UP	35.7805	0.371687	6.5889	1.65e-09	5.93e-09	UP	18.0654	0.36818		6.28e-05	0.00015491	UP
PGSC0003DMG400003371	Arabinogalactan protein 2 [Source:PGSC_GENE%3BAcc:PGSC0003DMG400003371]	0.00660282	0.357496	0.783271	2.1276	0.234579	0.504624	1.60394	1.42442	68.9169	12.0868	2.5114	0.17153	0.52241	FALSE	62.7957	12.391	2.3414	0.15428	0.47891	FALSE	19.0502	10.2344	0.89638	0.79324	0.99419	FALSE	35.6969	0.406065	5.3206	6.4579	8.18e-09	2.62e-08	UP	92.7242	0.371687	7.9627	3.63e-22	2.66e-21	UP	14.7136	0.36818		0.00047985	0.0010793	UP
PGSC0003DMG400012600	Conserved gene of unknown function [Source:PGSC_GENE%3BAcc:PGSC0003DMG400012600]	0.0122335	0.22209	0.908346	1.22897	0	0.213815	1.09901	1.00161	29.9054	0	Inf	0.047428	0.26546	FALSE	28.094	0	Inf	0.032018	0.19804	FALSE	5.12976	0	Inf	0.4368	0.80501	FALSE	26.3655	0.478286	3.7435	5.7846	1.78e-06	4.8e-06	UP	34.1202	0.433368	6.2989	1.39e-07	4.34e-07	UP	5.80395	0.433317		0.17003	0.25407	FALSE
PGSC0003DMG400001430	SPX%2C N-terminal%3B EXS%2C C-terminal [Source:PGSC_GENE%3BAcc:PGSC0003DMG400001430]	0.0069181	0.467757	1.27283	0.407796	0.00731757	3.70788	1.39991	0.245711	192.222	1.20868	7.3132	0.00024579	0.0086786	UP	34.6995	1.2391	4.8076	0.047879	0.25255	FALSE	442.613	1.02344	8.7565	3.21e-06	0.000369	UP	185.986	1.36264	5.6429	7.0926	8.73e-41	1.2e-39	UP	57.0019	1.23842	5.5244	4.47e-07	1.33e-06	UP	61.6993	1.23481		5.64e-10	2.1e-09	UP
PGSC0003DMG400006190	Minichromosome maintenance protein 10 isoform 1 [Source:PGSC_GENE%3BAcc:PGSC0003DMG400006190]	0.133362	1.26326	15.8178	4.5463	0.0457398	1.40852	8.07538	3.62349	532.375	3.62603	7.1979	2.67e-06	0.00038196	UP	245.186	3.7173	6.0435	9.23e-05	0.0033367	UP	80.6012	3.07032	4.7143	0.019412	0.15715	FALSE	1109.32	12.6062	2.8038	6.4594	8.9e-84	4.15e-82	UP	304.842	11.4495	4.7347	3.25e-47	6.71e-46	UP	79.9772	11.4538		1.09e-09	3.98e-09	UP
Novel01245	PREDICTED: putative cyclin-A3-1-like [Solanum tuberosum]	0.00501029	0.0974815	3.62728	0.835169	0.106351	0.157351	1.25933	0.894642	59.5696	6.04338	3.3011	0.10018	0.39652	FALSE	43.3472	6.1955	2.8066	0.13405	0.44497	FALSE	6.45477	5.1172	0.33501	1	1	FALSE	182.352	0.33959	3.8313	9.0687	2.46e-42	3.57e-41	UP	40.1379	0.30914	7.0206	1.15e-10	4.52e-10	UP	4.42053	0.310563		0.16973	0.25375	FALSE
PGSC0003DMG400011837	Minichromosome maintenance 5 protein [Source:PGSC_GENE%3BAcc:PGSC0003DMG400011837]	0.218626	3.9912	34.0273	8.46252	0.675397	5.70909	18.2515	7.91126	2635.15	117.242	4.4903	8.68e-05	0.0042803	UP	1172.87	120.193	3.2866	0.00099501	0.01912	UP	717.15	99.2737	2.8528	0.013148	0.12455	FALSE	5225.22	45.2595	3.7494	6.8511	2.08e-201	1.18e-198	UP	1241.87	41.1566	4.9152	2.53e-57	7.41e-56	UP	553.296	41.1412		5.53e-21	3.72e-20	UP
Novel02993	PREDICTED: uncharacterized protein LOC101250708 [Solanum lycopersicum]	0.0304507	0.719381	2.75402	3.59179	0.0917281	2.39705	0.732189	0.441972	8.06764	1.20868	2.7387	0.53278	0.8512	FALSE	4.9308	1.2391	1.9925	0.71563	0.95648	FALSE	22.8526	1.02344	4.4809	0.12888	0.4539	FALSE	32.1279	0.478286	4.1283	6.0698	0.00029113	0.00064078	UP	39.9433	0.433368	6.5262	3.86e-10	1.45e-09	UP	7.57787	0.433317		0.028615	0.050794	FALSE
PGSC0003DMG400007086	Mixed-lineage leukemia protein [Source:PGSC_GENE%3BAcc:PGSC0003DMG400007086]	0.0633464	0.0290894	10.854	2.77894	0	0.140305	6.51752	2.54053	418.111	0	Inf	5.82e-07	0.00012675	UP	167.086	0	Inf	4.2e-05	0.0018799	UP	7.77052	0	Inf	0.27313	0.6515	FALSE	739.884	5.82507	-1.5655	6.9889	3.45e-79	1.45e-77	UP	180.938	5.32511	5.0865	6.02e-27	5.51e-26	UP	1.78809	5.29223		0.36369	0.4899	FALSE
Novel02989	PREDICTED: G-type lectin S-receptor-like serine/threonine-protein kinase SD2-5-like [Solanum tuberosum]	0.0122895	0.222832	1.51997	2.14298	1.51302	1.42389	7.94296	3.96984	152.408	35.0516	2.1204	0.13757	0.46708	FALSE	78.4437	35.9339	1.1263	0.44619	0.78811	FALSE	24.195	29.6798	-0.29477	0.69797	0.94758	FALSE	31.1687	0.33959	3.7305	6.5202	8.27e-05	0.00019209	UP	41.9547	0.30914	7.0844	3.45e-11	1.4e-10	UP	4.12243	0.310563		0.19822	0.29054	FALSE
PGSC0003DMG400001478	Conserved gene of unknown function [Source:PGSC_GENE%3BAcc:PGSC0003DMG400001478]	0.00994917	0.556628	1.1607	0.596115	0.0706931	0.406898	0.301798	0.343565	8.70266	2.41735	1.848	0.66392	0.93483	FALSE	10.0352	2.4782	2.0177	0.5493	0.8627	FALSE	9.95873	2.04688	2.2825	0.52967	0.85285	FALSE	35.1078	0.406065	5.3664	6.4339	1.13e-08	3.58e-08	UP	17.2825	0.371687	5.5391	0.00016998	0.00039533	UP	15.1881	0.36818		0.00037914	0.00086174	UP
PGSC0003DMG400021324	Spotted leaf protein [Source:PGSC_GENE%3BAcc:PGSC0003DMG400021324]	0.00313787	0.170209	0.416562	0.21357	0.0891835	0.0541992	0.123066	0.110809	11.0026	9.6694	0.18634	1	1	FALSE	10.1354	9.9128	0.032041	1	1	FALSE	4.231	8.18752	-0.95243	0.50574	0.83613	FALSE	39.9523	0.406065	5.3208	6.6204	8.38e-10	2.86e-09	UP	19.5944	0.371687	5.7202	2.47e-05	6.28e-05	UP	14.7158	0.36818		0.0039329	0.0079157	UP
PGSC0003DMG400002075	Protein COBRA [Source:PGSC_GENE%3BAcc:PGSC0003DMG400002075]	0.00423662	0.2203	0.390537	0.203978	0.0127622	0.522268	0.450258	0.430455	35.1808	1.20868	4.8633	0.076859	0.34206	FALSE	34.9881	1.2391	4.8195	0.048795	0.25574	FALSE	36.1808	1.02344	5.1437	0.056247	0.29301	FALSE	32.7146	0.478286	5.2662	6.0959	4.17e-08	1.27e-07	UP	16.3988	0.433368	5.2419	0.00054724	0.0012	UP	16.6759	0.433317		0.0008787	0.0019185	UP
PGSC0003DMG400002523	Stem 28 kDa glycoprotein [Source:PGSC_GENE%3BAcc:PGSC0003DMG400002523]	0.0102906	0.0472764	4.16301	10.5931	0.179129	1.3974	30.4735	46.9826	1539.51	10.8781	7.1449	7.81e-08	3.33e-05	UP	2444.57	11.1519	7.7761	3.52e-09	1.79e-06	UP	61.5312	9.21096	2.7399	0.15226	0.49398	FALSE	223.557	0.745655	1.7568	8.2279	1.5e-48	2.65e-47	UP	544.504	0.680826	9.6434	2.1e-105	2.24e-103	UP	2.29373	0.678743		0.6223	0.75747	FALSE
PGSC0003DMG400030163	Avr9/Cf-9 rapidly elicited protein 180 [Source:PGSC_GENE%3BAcc:PGSC0003DMG400030163]	0.0278061	0.402267	2.36504	4.05788	0.460689	1.78143	5.2671	4.90055	126.872	13.2954	3.2544	0.043012	0.24956	FALSE	121.059	13.6301	3.1508	0.030864	0.19351	FALSE	37.4143	11.2578	1.7327	0.41411	0.78685	FALSE	60.4391	0.956571	3.4179	5.9815	0.00082947	0.001742	UP	98.7568	0.866736	6.8321	3.68e-08	1.2e-07	UP	9.26251	0.866634		0.023939	0.043053	UP
PGSC0003DMG400012001	White-brown-complex ABC transporter family [Source:PGSC_GENE%3BAcc:PGSC0003DMG400012001]	0.00147584	0.0425256	0.149674	0.143259	0.0157297	0.134447	0.244866	0.102334	46.9267	3.62603	3.6939	0.099481	0.39519	FALSE	20.1157	3.7173	2.436	0.29793	0.66643	FALSE	22.6728	3.07032	2.8845	0.27599	0.65464	FALSE	30.5205	0.406065	4.4093	6.2319	1.59e-07	4.66e-07	UP	27.9894	0.371687	6.2346	1.81e-07	5.6e-07	UP	7.82354	0.36818		0.02706	0.048214	UP
PGSC0003DMG400003519	Conserved gene of unknown function [Source:PGSC_GENE%3BAcc:PGSC0003DMG400003519]	0.00894323	0.263184	0.573525	1.39297	0.0269401	0.766712	1.17483	1.1144	43.998	1.20868	5.1859	0.047231	0.26481	FALSE	42.7639	1.2391	5.109	0.028377	0.18355	FALSE	24.9224	1.02344	4.6059	0.11218	0.42501	FALSE	22.7671	0.478286	4.4434	5.5729	1.16e-05	2.91e-05	UP	52.7943	0.433368	6.9286	5.38e-14	2.63e-13	UP	9.42789	0.433317		0.010234	0.019479	UP
PGSC0003DMG400039124	Bax inhibitor 1 [Source:PGSC_GENE%3BAcc:PGSC0003DMG400039124]	0.0095288	0.0462502	0.755731	1.33825	0	0.044263	1.20169	2.37473	41.751	0	Inf	0.0231	0.17776	FALSE	85.4565	0	Inf	0.0010474	0.019786	UP	1.37554	0	Inf	0.96483	1	FALSE	28.1407	0.478286	1.8391	5.8786	5.05e-07	1.42e-06	UP	47.6219	0.433368	6.7799	1.25e-12	5.6e-12	UP	1.55037	0.433317		0.70409	0.83044	FALSE
PGSC0003DMG400022941	2-oxoglutarate-dependent dioxygenase [Source:PGSC_GENE%3BAcc:PGSC0003DMG400022941]	0.0044234	0.200439	0.629591	0.563118	0.141436	0.503616	2.18848	1.80177	140.51	10.8781	3.6912	0.02208	0.17306	FALSE	118.714	11.1519	3.4121	0.022225	0.15812	FALSE	28.0692	9.21096	1.6076	0.48858	0.82262	FALSE	42.7966	0.406065	5.0652	6.7196	5.54e-07	1.56e-06	UP	36.5917	0.371687	6.6213	8.67e-10	3.18e-09	UP	12.3262	0.36818		0.05377	0.090155	FALSE
PGSC0003DMG400012726	Conserved gene of unknown function [Source:PGSC_GENE%3BAcc:PGSC0003DMG400012726]	0.00748713	0.0370401	1.04821	0.602923	0	0	0.416751	0.353311	13.1551	0	Inf	0.1805	0.52647	FALSE	11.54	0	Inf	0.17068	0.49973	FALSE	0	0	NA	NA	NA	NA	35.2685	0.33959	1.858	6.6984	1.26e-08	3.99e-08	UP	19.3798	0.30914	5.9702	2.73e-05	6.9e-05	UP	1.12579	0.310563		0.83104	0.93473	FALSE
Novel00691	--	0.0095205	0.370892	0.68159	1.28376	0.0338236	0.617828	1.23757	1.13775	37.1586	1.20868	4.9422	0.070932	0.32988	FALSE	34.7833	1.2391	4.811	0.049142	0.25635	FALSE	16.0667	1.02344	3.9726	0.20754	0.56842	FALSE	21.5462	0.406065	4.8451	5.7296	2.27e-05	5.54e-05	UP	38.8572	0.371687	6.708	2.72e-10	1.04e-09	UP	10.5823	0.36818		0.0053522	0.010601	UP
PGSC0003DMG400010465	Peroxidase [Source:PGSC_GENE%3BAcc:PGSC0003DMG400010465]	0.00534631	0.872963	1.7327	0.252371	0	1.15137	2.03338	0.701522	128.602	0	Inf	0.00049325	0.014036	UP	44.9609	0	Inf	0.0098778	0.094114	FALSE	62.024	0	Inf	0.005806	0.073581	FALSE	115.009	0.478286	6.9166	7.9097	8.8e-20	5.16e-19	UP	16.1181	0.433368	5.2169	0.015752	0.028312	UP	52.3477	0.433317		1.97e-05	5.11e-05	UP
PGSC0003DMG400025445	Gene of unknown function [Source:PGSC_GENE%3BAcc:PGSC0003DMG400025445]	0.0245639	1.13883	3.73657	2.14922	0	0.015142	0.121566	0.0930647	3.05712	0	Inf	0.6949	0.946	FALSE	2.41902	0	Inf	0.7441	0.97312	FALSE	0.340624	0	Inf	1	1	FALSE	99.824	0.884351	5.0983	6.8186	3.45e-10	1.21e-09	UP	54.7028	0.805055	6.0864	8.7e-07	2.52e-06	UP	27.4571	0.801497		9.98e-07	2.9e-06	UP
PGSC0003DMG400024624	Conserved gene of unknown function [Source:PGSC_GENE%3BAcc:PGSC0003DMG400024624]	0.0051834	0.475426	0.750423	0.243388	0	0.197674	0.633039	0.105564	28.7755	0	Inf	0.05078	0.27581	FALSE	4.94267	0	Inf	0.43071	0.77456	FALSE	7.87419	0	Inf	0.27984	0.65726	FALSE	36.4602	0.33959	6.0697	6.7464	5.71e-09	1.85e-08	UP	11.3213	0.30914	5.1946	0.0035813	0.0070871	UP	20.8603	0.310563		1.25e-05	3.3e-05	UP
PGSC0003DMG400016125	UDP-rhamnose:rhamnosyltransferase [Source:PGSC_GENE%3BAcc:PGSC0003DMG400016125]	0.00390721	0.110057	0.23656	0.398251	0.164778	0.508389	0.790052	1.11896	67.6575	16.9215	1.9994	0.2711	0.64099	FALSE	98.3782	17.3474	2.5036	0.088866	0.35798	FALSE	37.7181	14.3282	1.3964	0.51153	0.84044	FALSE	21.4997	0.478286	4.3813	5.4903	2.62e-05	6.37e-05	UP	34.6184	0.433368	6.3198	3.24e-09	1.14e-08	UP	9.03038	0.433317		0.012518	0.023501	UP
Novel01841	PREDICTED: uncharacterized protein LOC102589523 [Solanum tuberosum]	0.00832531	0.0918955	0.522942	0.82035	0.0250787	0.30807	0.320559	0.276443	12.7624	1.20868	3.4004	0.34135	0.71544	FALSE	11.3538	1.2391	3.1958	0.32964	0.69808	FALSE	10.8698	1.02344	3.4088	0.35733	0.73833	FALSE	22.3012	0.478286	3.0308	5.5431	1.59e-05	3.96e-05	UP	33.4785	0.433368	6.2715	6.47e-09	2.23e-08	UP	3.54132	0.433317		0.27538	0.38638	FALSE
PGSC0003DMG400012634	Virulence factor MVIN [Source:PGSC_GENE%3BAcc:PGSC0003DMG400012634]	0.0174733	0.639649	1.85255	0.590801	1.1777	0.983852	1.53115	0.925557	108.301	100.32	0.11044	1	1	FALSE	67.6953	102.845	-0.60335	0.50462	0.83122	FALSE	60.6501	84.9455	-0.48603	0.60787	0.89994	FALSE	139.624	1.77445	4.755	6.298	3.96e-27	3.22e-26	UP	42.567	1.60924	4.7253	5.7e-09	1.97e-08	UP	43.487	1.61051		1.53e-09	5.54e-09	UP
PGSC0003DMG400008643	Conserved gene of unknown function [Source:PGSC_GENE%3BAcc:PGSC0003DMG400008643]	0.0118424	0.037202	0.83792	2.32409	0.124857	0.239554	1.76011	2.5687	199.205	16.9215	3.5573	0.015224	0.13856	FALSE	297.9	17.3474	4.102	0.0012752	0.022548	UP	23.5834	14.3282	0.71892	0.83838	1	FALSE	100.413	1.91314	1.2159	5.7139	1.21e-21	7.69e-21	UP	266.264	1.73347	7.2631	1.21e-57	3.57e-56	UP	4.02613	1.73327		0.47959	0.61438	FALSE
PGSC0003DMG400015726	Glutathione s-transferase [Source:PGSC_GENE%3BAcc:PGSC0003DMG400015726]	0.140674	1.38551	9.47722	17.9765	0.482228	2.12031	27.1212	53.8433	1301.88	27.7995	5.5494	4.81e-06	0.00059606	UP	2662.67	28.4993	6.5458	1.06e-07	2.5e-05	UP	88.5813	23.5391	1.9119	0.24916	0.62409	FALSE	483.125	9.67908	2.8606	5.6414	1.98e-33	2.09e-32	UP	877.876	8.85793	6.6309	6.1e-45	1.18e-43	UP	63.7605	8.7787		6.06e-08	1.94e-07	UP
PGSC0003DMG400028254	SAUR family protein [Source:PGSC_GENE%3BAcc:PGSC0003DMG400028254]	0.0102057	0.0179128	0.867336	1.6035	0	0.0710283	1.14085	3.16554	37.5175	0	Inf	0.030238	0.20619	FALSE	106.804	0	Inf	0.00041217	0.010204	UP	2.025	0	Inf	0.8041	0.99821	FALSE	30.1529	0.478286	0.37744	5.9783	2.44e-07	7.04e-07	UP	53.2936	0.433368	6.9422	4.51e-14	2.21e-13	UP	0.562893	0.433317		1	1	FALSE
PGSC0003DMG400024602	Conserved gene of unknown function [Source:PGSC_GENE%3BAcc:PGSC0003DMG400024602]	0.0103162	0.088978	0.597029	1.53105	0.290843	0.63277	1.03067	1.3326	56.9153	19.3388	1.5573	0.41627	0.76284	FALSE	75.6307	19.8256	1.9316	0.20384	0.54917	FALSE	30.0965	16.375	0.8781	0.69418	0.94627	FALSE	35.1533	0.817875	2.6675	5.4256	0.0025686	0.0050774	UP	86.212	0.742508	6.8593	3.6e-21	2.53e-20	UP	4.72592	0.74388		0.22089	0.31909	FALSE
PGSC0003DMG400000919	Nodulin family protein [Source:PGSC_GENE%3BAcc:PGSC0003DMG400000919]	0.0106729	0.455314	0.756675	2.00892	0.04531	0.89487	0.207138	3.3932	13.7727	3.62603	1.9254	0.55531	0.86834	FALSE	230.292	3.7173	5.9531	0.00012963	0.0042881	UP	51.5195	3.07032	4.0687	0.060876	0.30819	FALSE	53.5982	1.01877	4.9651	5.7173	0.00040974	0.00088777	UP	135.638	0.927419	7.1923	2.95e-10	1.12e-09	UP	29.1008	0.931689		3.75e-05	9.45e-05	UP
PGSC0003DMG400001717	Sts15 protein [Source:PGSC_GENE%3BAcc:PGSC0003DMG400001717]	0.00762557	0.0489377	0.851768	0.867735	0	0.24986	0.863056	1.20452	32.0282	0	Inf	0.041702	0.24515	FALSE	45.8263	0	Inf	0.0088062	0.087064	FALSE	8.24021	0	Inf	0.27507	0.65369	FALSE	33.5958	0.406065	2.2442	6.3704	2.19e-08	6.84e-08	UP	32.6776	0.371687	6.4581	3.89e-08	1.27e-07	UP	1.74437	0.36818		0.63144	0.76424	FALSE
PGSC0003DMG400030351	Cdc6 [Source:PGSC_GENE%3BAcc:PGSC0003DMG400030351]	0.092113	1.69282	11.1934	2.707	0.127829	1.82622	5.39215	1.99084	594.272	16.9215	5.1342	7.4e-05	0.0038102	UP	224.808	17.3474	3.6959	0.0047932	0.058019	FALSE	175.203	14.3282	3.6121	0.020623	0.16333	FALSE	1310.9	14.5443	3.7581	6.494	6.75e-56	1.47e-54	UP	302.96	13.2442	4.5157	3.16e-29	3.2e-28	UP	178.995	13.2294		8.94e-18	5.18e-17	UP
PGSC0003DMG401022600	MYC1 [Source:PGSC_GENE%3BAcc:PGSC0003DMG401022600]	0.00398384	0.196005	0.316093	0.475624	0.325529	0.777398	1.48323	0.441358	105.932	27.7995	1.93	0.21917	0.58135	FALSE	31.9964	28.4993	0.16698	1	1	FALSE	48.0466	23.5391	1.0294	0.61621	0.90542	FALSE	23.885	0.406065	5.1811	5.8783	6.78e-06	1.74e-05	UP	34.287	0.371687	6.5274	7.16e-07	2.09e-06	UP	13.3579	0.36818		0.0010967	0.002368	UP
PGSC0003DMG400022276	Conserved gene of unknown function [Source:PGSC_GENE%3BAcc:PGSC0003DMG400022276]	0.00291675	0.0719294	0.608459	1.95437	0.0256973	0.239344	1.06646	1.69093	208.43	6.04338	5.1081	0.0016699	0.031618	UP	340.956	6.1955	5.7822	3.98e-05	0.001821	UP	40.8333	5.1172	2.9963	0.16241	0.5102	FALSE	126.51	0.817875	4.1834	7.2732	2.09e-20	1.26e-19	UP	388.447	0.742508	9.0311	2.06e-60	6.6e-59	UP	13.5155	0.74388		0.002508	0.0051922	UP
PGSC0003DMG400006941	Conserved gene of unknown function [Source:PGSC_GENE%3BAcc:PGSC0003DMG400006941]	0.0187792	0.179538	1.02445	3.64559	0.0665011	0.732393	2.22099	3.46532	168.385	6.04338	4.8003	0.0040735	0.058538	FALSE	269.811	6.1955	5.4446	0.00015996	0.0049735	UP	48.5417	5.1172	3.2458	0.1221	0.44469	FALSE	82.3653	2.03607	2.8164	5.3382	1.14e-16	5.76e-16	UP	280.124	1.85757	7.2365	5.61e-53	1.44e-51	UP	13.0207	1.84842		0.018399	0.03374	UP
PGSC0003DMG400006451	EPIDERMAL PATTERNING FACTOR 4 [Source:PGSC_GENE%3BAcc:PGSC0003DMG400006451]	0.0108217	0.387057	0.727569	1.23589	0.192232	3.02766	1.37524	2.02398	36.0052	6.04338	2.5748	0.25831	0.62732	FALSE	54.1444	6.1955	3.1275	0.082731	0.34314	FALSE	68.9368	5.1172	3.7518	0.05547	0.29099	FALSE	20.2429	0.406065	4.7214	5.6396	5.19e-05	0.00012297	UP	32.8504	0.371687	6.4657	8.88e-09	3.03e-08	UP	9.71246	0.36818		0.0088582	0.017028	UP
PGSC0003DMG401000668	Glycosyl hydrolase family 9 [Source:PGSC_GENE%3BAcc:PGSC0003DMG401000668]	0.00758332	0.256053	1.13963	4.97345	1.55177	4.82712	9.17099	2.63759	919.539	186.136	2.3046	0.024136	0.1826	FALSE	269.088	190.821	0.49585	0.6614	0.93322	FALSE	422.09	157.61	1.4212	0.22898	0.59864	FALSE	120.908	1.08524	4.6306	6.7997	1.88e-14	8.43e-14	UP	504.144	0.989966	8.9922	4.41e-46	8.79e-45	UP	24.5063	0.989306		1.79e-05	4.67e-05	UP
PGSC0003DMG400007850	Gene of unknown function [Source:PGSC_GENE%3BAcc:PGSC0003DMG400007850]	0.0182506	0.671221	2.05768	9.82504	0.38484	0.449239	4.73778	6.72171	87.1094	8.46073	3.364	0.060584	0.3023	FALSE	126.347	8.6737	3.8646	0.010983	0.10089	FALSE	7.18085	7.16408	0.0033739	0.85996	1	FALSE	40.0257	0.478286	4.7661	6.3869	8.77e-10	2.99e-09	UP	182.177	0.433368	8.7155	2.25e-10	8.63e-10	UP	11.7907	0.433317		0.017896	0.03288	UP
PGSC0003DMG400029562	Cytochrome P450 [Source:PGSC_GENE%3BAcc:PGSC0003DMG400029562]	0.00604519	0.297457	4.39701	20.7303	0.372817	1.82849	10.5443	53.2328	996.333	42.3036	4.5578	8.98e-05	0.0043809	UP	5181.7	43.3685	6.9006	2.64e-07	4.57e-05	UP	149.747	35.8204	2.0637	0.16317	0.51177	FALSE	441.471	0.817875	5.1796	9.0762	4.51e-20	2.68e-19	UP	1988.52	0.742508	11.387	9.64e-153	3e-150	UP	26.9605	0.74388		0.00030229	0.00069424	UP
PGSC0003DMG400026933	Hydrogen peroxide-induced 1 [Source:PGSC_GENE%3BAcc:PGSC0003DMG400026933]	2.35874	3.8223	124.492	414.15	15.3499	13.5824	237.98	262.45	6981.78	540.278	3.6918	0.0024791	0.041643	UP	7918.1	553.878	3.8375	0.0017388	0.028346	UP	347.119	457.478	-0.39827	0.57676	0.87972	FALSE	3876.58	98.9975	0.25731	5.2912	9.92e-60	2.43e-58	UP	12324.2	89.9359	7.0984	2.79e-143	7.16e-141	UP	107.446	89.8949		0.59021	0.72544	FALSE
PGSC0003DMG400012725	Conserved gene of unknown function [Source:PGSC_GENE%3BAcc:PGSC0003DMG400012725]	0.00691294	0.0508226	0.832258	0.645532	0	0.035468	0.499407	0.39696	24.3378	0	Inf	0.070175	0.32784	FALSE	19.7031	0	Inf	0.06731	0.30625	FALSE	1.4716	0	Inf	0.87876	1	FALSE	42.7438	0.478286	2.4452	6.4817	7.97e-06	2.03e-05	UP	31.6803	0.433368	6.1918	1.75e-08	5.86e-08	UP	2.35984	0.433317		0.51892	0.65536	FALSE
PGSC0003DMG400022764	Glutamate decarboxylase isoform3 [Source:PGSC_GENE%3BAcc:PGSC0003DMG400022764]	0.00517328	2.11435	1.60171	0.621332	0.219622	7.13203	4.44473	0.453342	405.968	24.1735	4.0699	0.0017404	0.03246	UP	42.5005	24.782	0.77819	0.69563	0.94586	FALSE	566.713	20.4688	4.7911	0.00036831	0.011735	UP	156.055	0.679179	8.225	7.844	1.07e-08	3.42e-08	UP	57.7094	0.618279	6.5444	1.02e-09	3.71e-09	UP	185.841	0.621126		6.08e-30	6.06e-29	UP
PGSC0003DMG400017152	Acid phosphatase 1 [Source:PGSC_GENE%3BAcc:PGSC0003DMG400017152]	0.0746518	2.10459	6.48851	24.2554	0.210646	3.94536	9.34934	9.00916	537.249	14.5041	5.2111	8.48e-05	0.0042243	UP	531.033	14.8692	5.1584	2.89e-05	0.0014612	UP	197.121	12.2813	4.0045	0.010227	0.10566	FALSE	395.227	6.12972	4.3796	6.0107	2.59e-70	8.61e-69	UP	1412.68	5.57197	7.986	3.33e-176	1.82e-173	UP	115.745	5.56038		1.56e-17	8.91e-17	UP
PGSC0003DMG400007801	Anthocyanin acyltransferase [Source:PGSC_GENE%3BAcc:PGSC0003DMG400007801]	0.0541547	0.344978	3.78386	13.6382	0.216875	3.23023	25.9785	19.4433	2051.35	20.5475	6.6415	2.47e-07	7.72e-05	UP	1577.2	21.0647	6.2264	1.67e-07	3.42e-05	UP	222.816	17.3985	3.6788	0.013029	0.12416	FALSE	317.097	6.1197	2.2313	5.6953	3.19e-56	7.01e-55	UP	1091.94	5.57097	7.6147	2.35e-65	8.73e-64	UP	26.1085	5.5603		0.0031893	0.0065065	UP
PGSC0003DMG400039347	Reticuline oxidase [Source:PGSC_GENE%3BAcc:PGSC0003DMG400039347]	0.00340811	0.00957235	0.445552	1.28233	0.0615984	0.0286877	0.275068	0.140171	27.0613	7.25205	1.8998	0.44175	0.78386	FALSE	14.2158	7.4346	0.93516	0.78582	0.99378	FALSE	2.4496	6.14064	-1.3258	0.43993	0.80665	FALSE	46.4148	0.478286	1.0546	6.6006	2.48e-11	9.35e-11	UP	127.921	0.433368	8.2054	1.54e-25	1.33e-24	UP	0.900034	0.433317		0.92454	1	FALSE
PGSC0003DMG400002696	Purple acid phosphatase 20 [Source:PGSC_GENE%3BAcc:PGSC0003DMG400002696]	0.00311085	0.224478	0.339539	0.549187	0.0132066	11.4374	3.00205	2.226	229.142	1.20868	7.5667	9.89e-05	0.0046756	UP	175.167	1.2391	7.1433	0.0001278	0.0042472	UP	761.506	1.02344	9.5393	1.05e-07	3.01e-05	UP	27.4759	0.33959	5.7248	6.3382	7.53e-07	2.09e-06	UP	42.4282	0.30914	7.1006	4.85e-11	1.95e-10	UP	16.4245	0.310563		0.0047532	0.0094654	UP
Novel01201	--	0.0102863	0.107778	2.64634	0.82577	0.742369	3.84972	15.2228	5.68504	351.554	20.5475	4.0967	0.002223	0.038486	UP	134.3	21.0647	2.6726	0.051318	0.26283	FALSE	77.531	17.3985	2.1558	0.21563	0.57972	FALSE	64.8184	0.33959	2.9378	7.5765	6.08e-09	1.97e-08	UP	19.3209	0.30914	5.9658	3.22e-05	8.08e-05	UP	2.37961	0.310563		0.47946	0.61424	FALSE
PGSC0003DMG400019154	Protein phosphatase 2c [Source:PGSC_GENE%3BAcc:PGSC0003DMG400019154]	0.00220503	0.0430625	0.234771	0.210628	0.0655273	0.10945	0.167525	0.240687	17.9665	8.46073	1.0865	0.73273	0.96748	FALSE	26.5446	8.6737	1.6137	0.43848	0.78181	FALSE	10.1622	7.16408	0.50436	0.99387	1	FALSE	26.8209	0.33959	3.8362	6.3034	1.36e-06	3.7e-06	UP	22.9604	0.30914	6.2147	3.03e-06	8.37e-06	UP	4.43562	0.310563		0.16903	0.25286	FALSE
PGSC0003DMG400026853	Endochitinase 3 [Source:PGSC_GENE%3BAcc:PGSC0003DMG400026853]	0.07295	0.724847	4.31095	11.457	0.141981	0.905333	3.23964	17.8239	183.409	9.6694	4.2455	0.006845	0.083042	FALSE	1039.95	9.9128	6.713	8.84e-08	2.12e-05	UP	44.606	8.18752	2.4457	0.2253	0.59417	FALSE	259.582	5.92455	2.8736	5.4533	5.26e-22	3.42e-21	UP	659.836	5.3852	6.937	3.24e-107	3.61e-105	UP	39.4299	5.38001		1.21e-05	3.21e-05	UP
Novel00434	PREDICTED: probable 2-oxoglutarate-dependent dioxygenase AOP1.2 [Solanum lycopersicum]	0.162481	0.33679	7.96887	28.547	2.23034	0.319895	10.3934	17.309	1760.02	456.879	1.9457	0.048288	0.26822	FALSE	3041.46	468.38	2.699	0.0069519	0.073765	FALSE	47.7447	386.86	-3.0184	0.0022531	0.040379	DOWN	1444.11	39.6853	0.61453	5.1854	3.11e-40	4.19e-39	UP	4943.72	36.0314	7.1002	7.37e-148	2.07e-145	UP	55.0951	35.9849		0.30813	0.42515	FALSE
PGSC0003DMG400002857	Ribonuclease t2 [Source:PGSC_GENE%3BAcc:PGSC0003DMG400002857]	0.00723094	0.0853261	0.86663	3.81115	0.0256895	1.05138	2.6196	4.45116	102.309	1.20868	6.4034	0.0039807	0.057887	FALSE	179.228	1.2391	7.1764	0.00010573	0.0036825	UP	36.1948	1.02344	5.1443	0.056857	0.2952	FALSE	36.0596	0.406065	3.1229	6.4725	6.17e-09	2e-08	UP	151.436	0.371687	8.6704	9.35e-24	7.44e-23	UP	3.2073	0.36818		0.30989	0.42727	FALSE
PGSC0003DMG400008347	Pentatricopeptide repeat-containing protein [Source:PGSC_GENE%3BAcc:PGSC0003DMG400008347]	0.00369314	0.206428	0.387785	0.227011	0.0940714	1.15575	1.13442	1.08245	72.7683	7.25205	3.3268	0.079977	0.34883	FALSE	71.7673	7.4346	3.271	0.056131	0.27622	FALSE	64.6416	6.14064	3.396	0.080368	0.36005	FALSE	26.437	0.33959	5.3545	6.2826	1.42e-06	3.85e-06	UP	14.8014	0.30914	5.5813	0.000459	0.0010152	UP	12.706	0.310563		0.0016128	0.0034169	UP
Novel00430	PREDICTED: latent-transforming growth factor beta-binding protein 4-like [Solanum tuberosum]	0.00616046	0.630645	0.476202	1.76556	0.259804	4.25901	11.2661	6.79326	611.13	16.9215	5.1746	6.37e-05	0.0034102	UP	378.727	17.3474	4.4484	0.00036164	0.0092312	UP	200.421	14.3282	3.8061	0.012393	0.12055	FALSE	27.4453	0.478286	6.2417	5.8425	1.29e-06	3.53e-06	UP	97.0697	0.433368	7.8073	2.66e-12	1.16e-11	UP	32.7901	0.433317		9.41e-09	3.21e-08	UP
PGSC0003DMG400002187	Gene of unknown function [Source:PGSC_GENE%3BAcc:PGSC0003DMG400002187]	0.00564726	0.115047	0.440166	0.424867	0.263718	0.0726013	0.227753	0.141357	9.49378	13.2954	-0.48588	0.67986	0.9413	FALSE	6.15213	13.6301	-1.1476	0.40199	0.75067	FALSE	2.60258	11.2578	-2.1129	0.26625	0.6439	FALSE	19.6326	0.33959	3.8984	5.8533	6.96e-05	0.00016305	UP	18.1612	0.30914	5.8765	6.45e-05	0.00015695	UP	4.63118	0.310563		0.14872	0.22542	FALSE
PGSC0003DMG400009951	Expansin11 [Source:PGSC_GENE%3BAcc:PGSC0003DMG400009951]	0.401148	3.0582	19.8677	79.3848	2.62771	59.5539	35.1206	37.296	2097.69	188.553	3.4758	0.0011565	0.024735	UP	2287.2	193.3	3.5647	0.00050027	0.011691	UP	3095.73	159.657	4.2772	0.00039795	0.012361	UP	1260.94	34.3339	2.4917	5.1987	2.79e-137	3.82e-135	UP	4813.59	31.2655	7.2664	3.95e-69	1.65e-67	UP	175.288	31.1654		2.65e-09	9.43e-09	UP
PGSC0003DMG400030996	Protein phosphatase inhibitor 2 containing protein [Source:PGSC_GENE%3BAcc:PGSC0003DMG400030996]	0.00961686	0.20567	0.726858	2.8905	0.136664	0.380329	0.857331	2.64332	25.1208	4.8347	2.3774	0.35003	0.72475	FALSE	79.9796	4.9564	4.0123	0.020995	0.15282	FALSE	9.66671	4.09376	1.2396	0.75268	0.97738	FALSE	22.7429	0.406065	3.9778	5.8076	1.08e-05	2.73e-05	UP	86.4135	0.371687	7.861	2.07e-22	1.54e-21	UP	5.80084	0.36818		0.11022	0.17271	FALSE
PGSC0003DMG400037454	Centromere protein [Source:PGSC_GENE%3BAcc:PGSC0003DMG400037454]	0.00656864	0.0191414	0.336525	1.18994	0	0.0296613	0.478282	0.980724	69.0402	0	Inf	0.0057774	0.074162	FALSE	145.612	0	Inf	8.71e-05	0.0032304	UP	3.6776	0	Inf	0.55785	0.87146	FALSE	51.6222	1.35836	1.0917	5.2481	2.13e-09	7.1e-09	UP	174.408	1.23656	7.14	3e-39	4.63e-38	UP	2.64753	1.24225		0.7812	0.89826	FALSE
PGSC0003DMG400028809	2-oxoglutarate-dependent dioxygenase [Source:PGSC_GENE%3BAcc:PGSC0003DMG400028809]	0.37521	4.02398	47.4657	1.80141	0.331103	4.02124	8.21672	0.898588	499.49	24.1735	4.369	0.00055833	0.015239	UP	55.8423	24.782	1.1721	0.47266	0.80671	FALSE	210.644	20.4688	3.3633	0.020762	0.16398	FALSE	3066.38	32.669	2.9816	6.5525	5.44e-27	4.42e-26	UP	111.283	29.7072	1.9054	9.62e-05	0.00023017	UP	234.548	29.695		2.41e-21	1.65e-20	UP
PGSC0003DMG400022836	Histone H3.2 [Source:PGSC_GENE%3BAcc:PGSC0003DMG400022836]	0.412051	0.628069	19.9111	89.9597	0.808153	1.18993	38.6851	52.0429	1256.67	31.4256	5.3215	9.01e-06	0.0009178	UP	1731.05	32.2166	5.7477	6.52e-07	8.87e-05	UP	33.5768	26.6094	0.33553	1	1	FALSE	684.873	19.1105	0.16744	5.1634	1.66e-92	9.58e-91	UP	2956.17	17.3929	7.4091	8.27e-71	3.65e-69	UP	19.5044	17.3672		0.77803	0.89641	FALSE
PGSC0003DMG401025807	Conserved gene of unknown function [Source:PGSC_GENE%3BAcc:PGSC0003DMG401025807]	0.0502193	4.80749	4.73227	29.1982	0.0841095	8.56604	2.858	2.5234	103.868	3.62603	4.8402	0.011613	0.11662	FALSE	92.6119	3.7173	4.6389	0.0085655	0.085531	FALSE	268.908	3.07032	6.4526	0.0002161	0.0081432	UP	180.553	2.5823	6.1363	6.1276	1.17e-11	4.5e-11	UP	1063.89	2.35075	8.822	9.05e-83	5.6e-81	UP	165.611	2.35431		4.32e-08	1.4e-07	UP
PGSC0003DMG400014295	KDEL motif-containing protein 1 [Source:PGSC_GENE%3BAcc:PGSC0003DMG400014295]	0.00344266	0.102836	0.527728	2.76498	0	0.974172	2.12048	2.64461	206.898	0	Inf	4.9e-05	0.0028237	UP	263.866	0	Inf	2.64e-06	0.00025444	UP	82.6757	0	Inf	0.002439	0.042484	UP	54.4106	0.478286	4.4663	6.8299	2.64e-13	1.11e-12	UP	272.547	0.433368	9.2967	1.08e-62	3.75e-61	UP	9.57818	0.433317		0.0090599	0.017397	UP
PGSC0003DMG400002959	Strictosidine synthase [Source:PGSC_GENE%3BAcc:PGSC0003DMG400002959]	0.00804481	0.0431525	1.11734	0.769388	0	0.0554101	0.733867	0.236321	56.4859	0	Inf	0.010292	0.10816	FALSE	18.5471	0	Inf	0.073446	0.32145	FALSE	3.66455	0	Inf	0.55818	0.87146	FALSE	91.1135	0.884351	1.9877	6.6869	2.49e-19	1.43e-18	UP	59.7232	0.805055	6.2131	0.00037374	0.00083617	UP	3.17867	0.801497		0.4249	0.55679	FALSE
PGSC0003DMG400020017	Lichenase [Source:PGSC_GENE%3BAcc:PGSC0003DMG400020017]	0.025047	0.350955	2.95109	18.6135	0.165021	0.905712	2.23638	33.5694	121.257	10.8781	3.4786	0.034746	0.22283	FALSE	1898.45	11.1519	7.4114	7.18e-09	3.2e-06	UP	42.9259	9.21096	2.2204	0.27309	0.6515	FALSE	172.08	1.96959	3.3675	6.449	1.78e-29	1.6e-28	UP	1035.2	1.79502	9.1717	1.91e-14	9.61e-14	UP	18.4822	1.7908		0.001503	0.0031961	UP
PGSC0003DMG400038230	(+)-neomenthol dehydrogenase [Source:PGSC_GENE%3BAcc:PGSC0003DMG400038230]	0.932727	5.67754	42.175	179.19	2.17475	21.3509	106.34	224.554	2254.63	55.5991	5.3417	7.82e-06	0.0008372	UP	4921.82	56.9986	6.4321	7.27e-07	9.7e-05	UP	396.073	47.0782	3.0726	0.017202	0.14594	FALSE	953.888	28.4395	2.1657	5.0679	1.22e-23	8.53e-23	UP	3872.36	25.8732	7.2256	2.28e-114	2.98e-112	UP	115.927	25.8379		2.31e-05	5.94e-05	UP
PGSC0003DMG400018014	Anthocyanin acyltransferase [Source:PGSC_GENE%3BAcc:PGSC0003DMG400018014]	0.096142	0.291224	15.9397	47.9735	0	0	0	0	0	0	NA	NA	NA	NA	0	0	NA	NA	NA	NA	0	0	NA	NA	NA	NA	1223.18	9.95026	1.162	6.9417	1.1e-17	5.89e-17	UP	3527.19	9.03978	8.608	2.78e-28	2.71e-27	UP	20.1818	9.01939		0.091489	0.14616	FALSE
PGSC0003DMG400012231	Electron transporter [Source:PGSC_GENE%3BAcc:PGSC0003DMG400012231]	0.00672702	0.0172776	0.852589	4.41481	0.114233	0.111384	1.55999	3.42784	110.096	9.6694	3.5092	0.039271	0.23699	FALSE	248.306	9.9128	4.6467	0.00072816	0.015413	UP	6.97947	8.18752	-0.23031	0.77976	0.98659	FALSE	63.8291	0.679179	0.91102	6.5543	1.05e-14	4.77e-14	UP	315.859	0.618279	8.9968	3.11e-69	1.3e-67	UP	1.16795	0.621126		0.96761	1	FALSE
PGSC0003DMG400010422	Pentatricopeptide repeat-containing protein [Source:PGSC_GENE%3BAcc:PGSC0003DMG400010422]	0.00346162	0.00901706	0.314835	0.825764	0.044087	0.152994	0.878397	1.19301	59.6563	3.62603	4.0402	0.058912	0.29833	FALSE	84.0711	3.7173	4.4993	0.012116	0.10741	FALSE	9.21155	3.07032	1.5851	0.71058	0.9555	FALSE	22.9038	0.33959	0.92954	6.0756	1.05e-05	2.64e-05	UP	57.5658	0.30914	7.5408	3.49e-11	1.42e-10	UP	0.59152	0.310563		1	1	FALSE
PGSC0003DMG400016114	Sinapyl alcohol dehydrogenase 2 [Source:PGSC_GENE%3BAcc:PGSC0003DMG400016114]	0.0116003	0.253379	0.833937	3.69105	0.017472	7.33002	4.94872	5.58953	286.604	1.20868	7.8895	2.94e-05	0.0020271	UP	330.89	1.2391	8.0609	2.61e-06	0.00025184	UP	365.82	1.02344	8.4816	8.6e-06	0.00077779	UP	51.0414	0.956571	4.0142	5.7377	1.25e-11	4.79e-11	UP	215.879	0.866736	7.9604	1.9e-42	3.31e-41	UP	14.0032	0.866634		0.11276	0.17626	FALSE
PGSC0003DMG400011243	R2r3-myb transcription factor [Source:PGSC_GENE%3BAcc:PGSC0003DMG400011243]	0.0133036	1.09785	0.955211	2.12214	0.0234416	4.37808	1.66214	5.57416	71.2162	1.20868	5.8807	0.013928	0.13027	FALSE	245.621	1.2391	7.631	1.77e-05	0.0010206	UP	165.12	1.02344	7.3339	0.0005044	0.014706	UP	43.5277	0.817875	5.9253	5.7339	4.13e-05	9.87e-05	UP	92.6088	0.742508	6.9626	9.12e-23	6.9e-22	UP	45.2067	0.74388		3.22e-11	1.3e-10	UP
PGSC0003DMG400008985	Basic 7S globulin 2 small subunit [Source:PGSC_GENE%3BAcc:PGSC0003DMG400008985]	0.00413486	0.241044	0.75575	0.390577	0.0351076	28.6244	6.1908	3.90919	358.863	2.41735	7.2139	1.81e-05	0.0014594	UP	232.02	2.4782	6.5488	6.59e-05	0.0026664	UP	1410.6	2.04688	9.4287	9.92e-09	5.1e-06	UP	46.0526	0.33959	5.4154	7.0833	8.39e-08	2.51e-07	UP	22.657	0.30914	6.1956	0.00041678	0.0009263	UP	13.2538	0.310563		0.0011585	0.0024953	UP
PGSC0003DMG401007298	Transcription factor [Source:PGSC_GENE%3BAcc:PGSC0003DMG401007298]	0.00978024	0.371898	2.36365	0.508819	0	0	0.469731	0.116102	11.2275	0	Inf	0.21947	0.58179	FALSE	2.87167	0	Inf	0.65445	0.92846	FALSE	0	0	NA	NA	NA	NA	60.9002	0.33959	4.7994	7.4865	6.99e-09	2.25e-08	UP	12.4575	0.30914	5.3326	0.023465	0.040938	UP	8.6481	0.310563		0.033026	0.057875	FALSE
PGSC0003DMG400000783	Extensin [Source:PGSC_GENE%3BAcc:PGSC0003DMG400000783]	1.97664	12.5675	104.604	395.792	1.82522	18.4223	113.41	335.296	10693.3	207.892	5.6847	0.00010618	0.0048596	UP	32811.4	213.125	7.2663	0.0007449	0.015694	UP	1506.44	176.032	3.0972	0.0052476	0.069176	FALSE	10537.3	268.514	2.2286	5.2944	9.69e-64	2.65e-62	UP	38142.4	244.318	7.2865	0	0	UP	1143.17	243.92		7.02e-19	4.29e-18	UP
Novel00136	PREDICTED: glutamate decarboxylase 1-like, partial [Solanum tuberosum]	0.00961052	2.04684	1.12444	0.337951	0	10.8563	1.45542	0.594062	51.2418	0	Inf	0.014315	0.13268	FALSE	21.2584	0	Inf	0.05899	0.28274	FALSE	325.447	0	Inf	5.06e-06	0.00053299	UP	41.5571	0.478286	7.2993	6.4411	4.62e-05	0.00010995	UP	11.9297	0.433368	4.7828	0.0022507	0.0045645	UP	68.2522	0.433317		1.03e-14	5.1e-14	UP
PGSC0003DMG400016113	Alcohol NADP+ oxidoreductase [Source:PGSC_GENE%3BAcc:PGSC0003DMG400016113]	0.00946588	0.0518002	0.6037	3.45469	0	0	1.19718	1.92951	30.0111	0	Inf	0.047248	0.26481	FALSE	49.6055	0	Inf	0.0069329	0.073618	FALSE	0	0	NA	NA	NA	NA	16.0722	0.33959	1.9977	5.5646	0.00053604	0.001149	UP	87.7515	0.30914	8.149	7.6e-18	4.53e-17	UP	1.24029	0.310563		0.81922	0.92479	FALSE
PGSC0003DMG400018801	Short chain alcohol dehydrogenase [Source:PGSC_GENE%3BAcc:PGSC0003DMG400018801]	0.0130056	0.0267051	0.537356	2.16642	0	0.25062	1.02542	3.47612	44.9494	0	Inf	0.019011	0.15867	FALSE	156.518	0	Inf	5.73e-05	0.0023998	UP	9.61741	0	Inf	0.23051	0.59992	FALSE	25.0896	0.817875	0.59779	4.9391	0.00058188	0.0012419	UP	96.7205	0.742508	7.0253	1.09e-23	8.65e-23	UP	1.12579	0.74388		0.96404	1	FALSE
PGSC0003DMG400004842	Beta-galactosidase [Source:PGSC_GENE%3BAcc:PGSC0003DMG400004842]	0.0251604	0.125386	1.34195	8.00815	0.18337	0.656503	2.44713	4.02919	309.06	27.7995	3.4748	0.0086249	0.095899	FALSE	522.107	28.4993	4.1953	0.00029215	0.0078743	UP	72.4956	23.5391	1.6228	0.35365	0.73443	FALSE	179.895	4.55043	1.8771	5.305	1.28e-25	9.76e-25	UP	1025.69	4.1485	7.9498	1.81e-43	3.29e-42	UP	15.1715	4.13015		0.051684	0.087025	FALSE
PGSC0003DMG400009411	UDP-glucosyltransferase [Source:PGSC_GENE%3BAcc:PGSC0003DMG400009411]	0.0432752	0.0716426	3.38538	21.932	0.0796131	0.0131866	0.267405	0.247704	20.1046	7.25205	1.4711	0.60665	0.90285	FALSE	19.292	7.4346	1.3757	0.57707	0.8822	FALSE	0.848233	6.14064	-2.8559	0.22631	0.59514	FALSE	272.813	4.70061	0.28466	5.8589	4.43e-32	4.41e-31	UP	1689.01	4.271	8.6274	1.9e-136	4.29e-134	UP	5.1989	4.26795		0.87195	0.97116	FALSE
PGSC0003DMG400023678	TGA10 transcription factor [Source:PGSC_GENE%3BAcc:PGSC0003DMG400023678]	0.00283571	0.00350718	0.428663	0.51104	0.048154	0.286128	1.36213	1.57327	114.422	4.8347	4.5648	0.01274	0.12267	FALSE	135.821	4.9564	4.7763	0.0031391	0.042566	UP	20.7417	4.09376	2.341	0.35907	0.74003	FALSE	38.0108	0.33959	-0.14203	6.8065	0.0083294	0.015395	UP	43.4263	0.30914	7.1342	2.63e-07	8e-07	UP	0.281446	0.310563		1	1	FALSE
Novel00311	--	0.00352497	0.00309347	0.378599	1.91452	0	0	0.11134	0.532071	10.481	0	Inf	0.23645	0.59922	FALSE	51.8627	0	Inf	0.0061181	0.068346	FALSE	0	0	NA	NA	NA	NA	38.139	0.478286	-0.62256	6.3172	8.04e-09	2.58e-08	UP	184.824	0.433368	8.7363	8.3e-14	4.01e-13	UP	0.281446	0.433317		1	1	FALSE
PGSC0003DMG401015527	Serine-threonine protein kinase%2C plant-type [Source:PGSC_GENE%3BAcc:PGSC0003DMG401015527]	0.00448056	0.369848	0.983789	0.116881	0	0.368172	0.556374	0.00754825	41.7598	0	Inf	0.022284	0.17399	FALSE	0.574333	0	Inf	1	1	FALSE	23.7063	0	Inf	0.05586	0.2919	FALSE	77.9841	0.478286	5.932	7.3492	1.85e-06	4.99e-06	UP	8.80068	0.433368	4.344	0.046662	0.07725	FALSE	26.4546	0.433317		0.00024661	0.00057132	UP
PGSC0003DMG400021877	Xyloglucan endo-transglycosylase [Source:PGSC_GENE%3BAcc:PGSC0003DMG400021877]	134.798	2.95121	0.876449	4.08602	29.2154	4.15386	0.148891	1.39215	8.32891	1952.01	-7.8726	1.89e-18	1.36e-14	DOWN	79.4425	2001.15	-4.6548	4.18e-10	3.37e-07	DOWN	198.268	1652.86	-3.0594	0.00028325	0.0098635	DOWN	51.7967	10742.4	-5.9561	-7.6962	7.13e-115	6.53e-113	DOWN	230.644	9779.31	-5.406	3.14e-78	1.7e-76	DOWN	157.373	9769.74		3.43e-81	1.8e-79	DOWN
PGSC0003DMG400012631	Microtubule-associated protein futsch [Source:PGSC_GENE%3BAcc:PGSC0003DMG400012631]	27.8112	1.82463	0.231843	0.9972	27.7745	1.37793	0.291644	1.63888	32.3942	3698.55	-6.8351	1.98e-17	1.14e-13	DOWN	185.126	3791.65	-4.3562	1.02e-09	6.9e-07	DOWN	131.915	3131.73	-4.5693	1.66e-08	7.7e-06	DOWN	27.3011	4417.65	-4.3717	-7.3382	9.75e-103	7.07e-101	DOWN	112.058	4024.51	-5.1665	6.78e-65	2.49e-63	DOWN	193.952	4015.2		3.53e-57	9.4e-56	DOWN
Novel01708	PREDICTED: titin-like isoform X12 [Solanum tuberosum]	26.4566	1.00043	0.17999	0.699423	27.0569	0.564217	0.0934654	1.39279	4.91504	1757.41	-8.482	2.09e-19	3e-15	DOWN	76.7815	1801.65	-4.5524	1.32e-09	8.15e-07	DOWN	26.3397	1488.08	-5.8201	1.44e-10	2.43e-07	DOWN	10.3294	2049.75	-5.1663	-7.6325	1.57e-257	1.88e-254	DOWN	38.323	1866.76	-5.6062	2.66e-158	9.39e-156	DOWN	51.882	1863.11		1.29e-180	6.59e-178	DOWN
PGSC0003DMG401020927	Putative bHLH transcription factor [Source:PGSC_GENE%3BAcc:PGSC0003DMG401020927]	25.5338	0.0896287	0.042175	0.36743	15.2627	0.109558	0.0145432	0.161326	0.582165	725.205	-10.283	3.68e-16	1.51e-12	DOWN	6.61962	743.46	-6.8114	3.95e-13	8.17e-10	DOWN	3.8121	614.064	-7.3317	4.42e-11	9.78e-08	DOWN	1.77185	1447.02	-8.5939	-9.6736	4.44e-90	2.42e-88	DOWN	14.8873	1316.89	-6.4669	1.91e-71	8.67e-70	DOWN	3.40442	1315.43		4.35e-84	2.47e-82	DOWN
Novel03642	PREDICTED: cytochrome P450 71A1-like [Solanum lycopersicum]	19.2219	1.23265	0.0628838	0.154991	0	0	0.0112464	0	0.291082	0	Inf	1	1	FALSE	0	0	NA	NA	NA	NA	0	0	NA	NA	NA	NA	1.70654	704.391	-4.4059	-8.6892	1.21e-125	1.34e-123	DOWN	4.03218	641.506	-7.3138	3.12e-111	3.89e-109	DOWN	30.2182	640.594		3.16e-70	1.24e-68	DOWN
PGSC0003DMG400023125	Conserved gene of unknown function [Source:PGSC_GENE%3BAcc:PGSC0003DMG400023125]	29.1761	0.187963	0.0852477	0.786201	57.222	0.108714	0.0538071	1.94959	0.873247	1102.31	-10.302	3.32e-19	3.18e-15	DOWN	32.2084	1130.06	-5.1328	2.2e-10	2e-07	DOWN	1.48465	933.377	-9.2962	1.76e-15	1.69e-11	DOWN	1.45031	670.361	-7.7177	-8.8524	1.23e-96	7.88e-95	DOWN	12.8225	610.177	-5.5725	1.55e-74	7.61e-73	DOWN	2.89567	609.569		1.81e-86	1.1e-84	DOWN
PGSC0003DMG400028094	Gene of unknown function [Source:PGSC_GENE%3BAcc:PGSC0003DMG400028094]	10.4109	0.309924	0.053356	0.137646	1.32006	0.0398107	0.039355	0.00760408	1.49083	59.2251	-5.312	0.0012002	0.0254	DOWN	0.285683	60.7159	-7.7315	1.78e-05	0.0010261	DOWN	1.27283	50.1486	-5.3001	0.0014916	0.030586	DOWN	2.118	557.165	-5.5126	-8.0393	9.95e-83	4.51e-81	DOWN	5.24812	507.578	-6.5957	4.64e-69	1.92e-67	DOWN	11.0928	506.388		1.21e-64	4.01e-63	DOWN
PGSC0003DMG400021056	Conserved gene of unknown function [Source:PGSC_GENE%3BAcc:PGSC0003DMG400021056]	6.744	0.989145	0.0330028	0.0858162	0	0	0	0	0	0	NA	NA	NA	NA	0	0	NA	NA	NA	NA	0	0	NA	NA	NA	NA	1.47208	406.128	-3.213	-8.1079	3.28e-66	9.7e-65	DOWN	3.66295	369.85	-6.6578	1.23e-57	3.64e-56	DOWN	39.8392	369.411		3.58e-26	3.07e-25	DOWN
PGSC0003DMG400012049	Gene of unknown function [Source:PGSC_GENE%3BAcc:PGSC0003DMG400012049]	7.44908	0.171239	0.0649975	0.202436	1.17042	0.00881186	0	0.0148764	0	53.1817	#NAME?	4.49e-05	0.002683	DOWN	0.574333	54.5204	-6.5688	9.33e-05	0.0033681	DOWN	0.282744	45.0314	-7.3153	0.00033435	0.010991	DOWN	2.61152	403.728	-5.8837	-7.2723	5.57e-89	2.95e-87	DOWN	7.78899	367.66	-5.5608	1.66e-65	6.18e-64	DOWN	6.21592	367.016		9.98e-74	4.28e-72	DOWN
PGSC0003DMG400025468	Integrase core domain containing protein [Source:PGSC_GENE%3BAcc:PGSC0003DMG400025468]	2.03835	0.0342751	0.016992	0.0633437	0.445111	0.0452804	0.0321994	0.0372886	3.05303	51.973	-4.0894	0.0083967	0.094306	FALSE	3.73388	53.2813	-3.8349	0.005232	0.061382	FALSE	3.7924	44.0079	-3.5366	0.020584	0.16321	FALSE	1.75291	283.884	-6.3361	-7.3394	3.84e-67	1.16e-65	DOWN	6.27182	258.456	-5.3649	4.17e-49	9.29e-48	DOWN	3.19533	258.154		2.52e-58	6.96e-57	DOWN
PGSC0003DMG400006071	Gene of unknown function [Source:PGSC_GENE%3BAcc:PGSC0003DMG400006071]	5.54537	0.242357	0.106072	0.230227	2.60717	0.122216	0.114898	0.0112674	3.36156	91.8593	-4.7722	0.00092333	0.021198	DOWN	0.34504	94.1716	-8.0924	7.54e-07	9.94e-05	DOWN	3.09906	77.7814	-4.6495	0.0011762	0.026084	DOWN	3.30665	233.068	-4.9589	-6.1392	5.35e-40	7.16e-39	DOWN	6.83591	212.367	-4.9573	2.72e-31	2.98e-30	DOWN	6.81367	211.908		6.81e-33	7.72e-32	DOWN
Novel02936	PREDICTED: condensin complex subunit 1-like [Nicotiana sylvestris]	8.41659	0.694687	0.0441164	0.176884	25.3643	3.46258	1.70216	3.45424	26.9694	485.887	-4.1712	2.11e-05	0.0016221	DOWN	56.7703	498.118	-3.1333	0.00026114	0.0072617	DOWN	47.6047	411.423	-3.1114	0.0018299	0.035028	DOWN	0.746925	192.328	-4.0407	-8.0084	5.34e-50	9.8e-49	DOWN	2.87011	175.231	-5.932	1.19e-38	1.79e-37	DOWN	10.6245	174.85		1.85e-28	1.75e-27	DOWN
PGSC0003DMG400004897	Auxin-repressed protein [Source:PGSC_GENE%3BAcc:PGSC0003DMG400004897]	51.9954	1.67873	0.395812	1.16457	7.48638	0.925277	0.384428	0.750606	8.66876	201.849	-4.5413	0.00015908	0.0063769	DOWN	17.4161	206.93	-3.5706	0.00050052	0.011691	DOWN	17.9468	170.914	-3.2515	0.0052695	0.069369	FALSE	9.43226	1672.21	-5.3958	-7.4699	2.58e-30	2.4e-29	DOWN	26.5559	1522.93	-5.8417	1.02e-23	8.12e-23	DOWN	36.1418	1521.63		8.44e-21	5.64e-20	DOWN
PGSC0003DMG400002435	Gene of unknown function [Source:PGSC_GENE%3BAcc:PGSC0003DMG400002435]	3.47142	0.349952	0.041395	0.158054	3.31982	0.070621	0.145652	0.166928	5.44381	151.084	-4.7946	0.00024022	0.0085553	DOWN	6.5662	154.888	-4.56	7.18e-05	0.0028594	DOWN	2.35258	127.93	-5.765	3.81e-05	0.0022933	DOWN	1.663	188.438	-3.7522	-6.8242	7.56e-45	1.19e-43	DOWN	6.0732	171.578	-4.8203	1.03e-31	1.15e-30	DOWN	12.7107	171.272		1.8e-25	1.49e-24	DOWN
PGSC0003DMG400027019	Polygalacturonase-1 non-catalytic subunit beta [Source:PGSC_GENE%3BAcc:PGSC0003DMG400027019]	1.48799	0.110331	0.00870612	0.025965	1.7183	0.185259	0.0114636	0.0350162	0.944083	166.797	-7.465	5.68e-07	0.00012454	DOWN	2.93026	170.996	-5.8668	1.1e-06	0.00012979	DOWN	12.9833	141.235	-3.4434	0.0049399	0.066465	FALSE	0.746925	172.271	-4.1953	-7.8495	5.43e-27	4.41e-26	DOWN	2.13939	156.757	-6.1952	8.76e-24	6.98e-23	DOWN	8.55337	156.692		2.41e-16	1.3e-15	DOWN
PGSC0003DMG400030199	Conserved gene of unknown function [Source:PGSC_GENE%3BAcc:PGSC0003DMG400030199]	2.3701	0.0472585	0.0134726	0.0137176	2.95582	0	0.200174	0.190288	8.1133	143.832	-4.148	0.0010386	0.023056	DOWN	7.92932	147.453	-4.2169	0.00023587	0.0066879	DOWN	0	121.789	#NAME?	1.94e-07	4.98e-05	DOWN	0.580609	137.551	-6.0925	-7.8882	5.5e-28	4.64e-27	DOWN	0.561972	125.152	-7.799	1.47e-27	1.39e-26	DOWN	1.83181	125.002		4.2e-24	3.26e-23	DOWN
PGSC0003DMG400013032	Conserved gene of unknown function [Source:PGSC_GENE%3BAcc:PGSC0003DMG400013032]	3.03876	0.0552466	0	0.0970049	1.21643	0.0201482	0.115466	0.346611	3.8518	48.347	-3.6498	0.015519	0.14013	FALSE	11.7582	49.564	-2.0756	0.094085	0.36794	FALSE	0.565489	40.9376	-6.1778	0.0011725	0.026055	DOWN	0	144.062	-6.2217	#NAME?	7.83e-32	7.74e-31	DOWN	3.26334	131.199	-5.3293	1.31e-22	9.81e-22	DOWN	1.75635	131.074		3.2e-24	2.49e-23	DOWN
PGSC0003DMG400006317	Gene of unknown function [Source:PGSC_GENE%3BAcc:PGSC0003DMG400006317]	1.48855	0.12104	0.00923065	0.0479947	0.0457398	0.0115309	0	0.0285577	0	3.62603	#NAME?	0.10961	0.41477	FALSE	1.95449	3.7173	-0.92746	0.6175	0.90702	FALSE	0.681248	3.07032	-2.1721	0.38409	0.76353	FALSE	0.648754	140.763	-4.0633	-7.7614	2.18e-38	2.77e-37	DOWN	3.23135	128.241	-5.3106	1.03e-27	9.79e-27	DOWN	7.65801	128.023		3.71e-22	2.65e-21	DOWN
PGSC0003DMG400021721	Root phototropism protein [Source:PGSC_GENE%3BAcc:PGSC0003DMG400021721]	4.37645	0.298428	0.0563766	0.00454936	1.99849	0.087386	0.0473724	0.104114	2.73988	143.832	-5.7141	3.73e-05	0.0024042	DOWN	6.42594	147.453	-4.5202	8.44e-05	0.0031747	DOWN	4.53056	121.789	-4.7486	0.00049195	0.014483	DOWN	3.58222	375.74	-4.3183	-6.7127	2.63e-17	1.38e-16	DOWN	0.276987	342.437	-10.272	2.18e-22	1.62e-21	DOWN	17.1359	341.862		2.95e-11	1.19e-10	DOWN
Novel00090	PREDICTED: isoleucine N-monooxygenase 1-like [Solanum lycopersicum]	1.35503	0.0254246	0	0.00891918	0.0611106	0	0	0.00250897	0	9.6694	#NAME?	0.021044	0.16805	FALSE	0.34504	9.9128	-4.8445	0.033246	0.20273	FALSE	0	8.18752	#NAME?	0.027072	0.19265	FALSE	0	255.707	-6.1791	#NAME?	1.52e-20	9.27e-20	DOWN	1.20019	232.616	-7.5985	3.79e-17	2.2e-16	DOWN	3.21042	232.63		3.21e-14	1.54e-13	DOWN
PGSC0003DMG400030289	Integrase [Source:PGSC_GENE%3BAcc:PGSC0003DMG400030289]	0.56893	0.0726831	0.0103099	0.013219	0.109795	0.0176684	0.00387215	0.0175237	0.3265	10.8781	-5.0582	0.03914	0.23682	FALSE	1.49964	11.1519	-2.8946	0.12051	0.42217	FALSE	1.25978	9.21096	-2.8702	0.1604	0.50706	FALSE	0.904986	67.2318	-3.4129	-6.2151	8.56e-18	4.59e-17	DOWN	1.10795	61.2034	-5.7876	2.03e-15	1.08e-14	DOWN	5.74358	61.1728		5.65e-10	2.11e-09	DOWN
PGSC0003DMG400025352	Chitinase 1 [Source:PGSC_GENE%3BAcc:PGSC0003DMG400025352]	0.967994	0.023584	0.021412	0.0270828	1.33233	0.0283367	0.0471711	0.0486873	4.40165	147.458	-5.0661	0.00015647	0.0062986	DOWN	4.60357	151.17	-5.0373	2.98e-05	0.0014915	DOWN	2.24987	124.86	-5.7943	4.48e-05	0.0025799	DOWN	2.09623	127.807	-5.8005	-5.93	3.81e-11	1.42e-10	DOWN	2.52488	116.511	-5.5281	3.35e-10	1.27e-09	DOWN	2.08307	116.102		3.93e-11	1.57e-10	DOWN
PGSC0003DMG400003416	Serine/threonine protein phosphatase 2A 57 kDa regulatory subunit B' beta isoform [Source:PGSC_GENE%3BAcc:PGSC0003DMG400003416]	0.594731	0.038666	0.0328717	0.0262922	0.67567	0.051663	0.00394175	0.0128777	0.291082	59.2251	-7.6686	9.76e-05	0.0046356	DOWN	0.978731	60.7159	-5.955	0.00010474	0.0036657	DOWN	3.31657	50.1486	-3.9184	0.009127	0.097762	FALSE	2.54621	62.1737	-4.3861	-4.6099	1.5e-12	6.09e-12	DOWN	1.94691	56.5684	-4.8607	2.23e-12	9.83e-12	DOWN	2.70322	56.5221		1.33e-11	5.47e-11	DOWN
PGSC0003DMG400043378	Conserved gene of unknown function [Source:PGSC_GENE%3BAcc:PGSC0003DMG400043378]	0.703979	0.148441	0.00386476	0.0591817	0.615343	0.0586095	0.0714298	0.0883297	4.03253	42.3036	-3.391	0.027605	0.19671	FALSE	5.15636	43.3685	-3.0722	0.025671	0.17236	FALSE	2.88628	35.8204	-3.6335	0.022705	0.17341	FALSE	0.234461	57.7247	-2.6893	-7.9437	1.15e-16	5.83e-16	DOWN	3.44008	52.5447	-3.933	9.68e-10	3.55e-09	DOWN	8.13829	52.492		1.07e-06	3.09e-06	DOWN
PGSC0003DMG400024028	Gene of unknown function [Source:PGSC_GENE%3BAcc:PGSC0003DMG400024028]	0.944091	0.0240333	0.0489069	0.0146674	1.27481	0.0577681	0	0.183951	0	58.0164	#NAME?	2.8e-05	0.0019567	DOWN	7.19769	59.4768	-3.0467	0.018759	0.14175	FALSE	1.92798	49.1251	-4.6713	0.0035175	0.053533	FALSE	1.9656	51.2405	-5.7376	-4.7042	8.85e-10	3.01e-09	DOWN	0.561972	46.6033	-6.3738	2.78e-12	1.22e-11	DOWN	0.872966	46.5788		1.76e-11	7.21e-11	DOWN
PGSC0003DMG400005817	Cytochrome P450 [Source:PGSC_GENE%3BAcc:PGSC0003DMG400005817]	0.922024	0.147754	0.0133827	0.0133464	0.506042	0.0726477	0.100639	0.174037	6.79395	41.095	-2.5966	0.076701	0.34167	FALSE	12.1396	42.1294	-1.7951	0.15509	0.47989	FALSE	4.33845	34.797	-3.0037	0.046832	0.26559	FALSE	0.959614	89.3016	-3.0859	-6.5401	7.38e-10	2.53e-09	DOWN	0.923206	81.2455	-6.4595	5.91e-10	2.2e-09	DOWN	9.57259	81.2798		3.18e-05	8.08e-05	DOWN
PGSC0003DMG400006696	Catechol O-methyltransferase [Source:PGSC_GENE%3BAcc:PGSC0003DMG400006696]	1.2211	0.0216611	0	0.00775529	0	0	0	0.0274604	0	0	NA	NA	NA	NA	1.1546	0	Inf	1	1	FALSE	0	0	NA	NA	NA	NA	0	71.0218	-6.2583	#NAME?	4.61e-11	1.71e-10	DOWN	0.323109	64.6007	-7.6434	6.82e-10	2.52e-09	DOWN	0.844339	64.6342		1.24e-08	4.18e-08	DOWN
PGSC0003DMG400012174	ATP binding protein [Source:PGSC_GENE%3BAcc:PGSC0003DMG400012174]	17.699	3.89864	0.170223	0.155453	19.4552	1.42998	0.256	1.22829	23.5991	2144.19	-6.5056	5.63e-15	1.8e-11	DOWN	114.888	2198.16	-4.258	5.24e-09	2.41e-06	DOWN	112.721	1815.58	-4.0096	1.23e-06	0.00019299	DOWN	16.5802	2327	-2.6266	-7.1329	4.33e-09	1.41e-08	DOWN	14.5271	2121.08	-7.1899	2.44e-09	8.68e-09	DOWN	343.097	2118.8		0.0015516	0.0032936	DOWN
PGSC0003DMG400007055	CYP72A58 [Source:PGSC_GENE%3BAcc:PGSC0003DMG400007055]	0.42152	0.00328462	0	0.00352796	0.326961	0.00459557	0.00322291	0	0.291082	35.0516	-6.9119	0.001124	0.024407	DOWN	0	35.9339	#NAME?	8.78e-05	0.0032389	DOWN	0.35367	29.6798	-6.3909	0.0019107	0.035944	DOWN	0	53.9076	-7.4455	#NAME?	4.28e-11	1.59e-10	DOWN	0.323109	49.1389	-7.2487	9.76e-10	3.57e-09	DOWN	0.281446	49.0602		1.1e-09	4.01e-09	DOWN
PGSC0003DMG400028098	Myb RL3 [Source:PGSC_GENE%3BAcc:PGSC0003DMG400028098]	2.93583	0.0188755	0.0351426	0	3.04516	0	0	0	0	56.8077	#NAME?	3.14e-05	0.0021099	DOWN	0	58.2377	#NAME?	5.15e-06	0.00041772	DOWN	0	48.1017	#NAME?	6.49e-05	0.0033477	DOWN	0.580609	65.3193	-7.719	-6.8138	2.52e-09	8.35e-09	DOWN	0	59.4299	#NAME?	1.46e-10	5.69e-10	DOWN	0.281446	59.3002		1.09e-09	4e-09	DOWN
PGSC0003DMG400028535	Conserved gene of unknown function [Source:PGSC_GENE%3BAcc:PGSC0003DMG400028535]	6.67675	0.0418527	0.00339759	0.0691335	17.5117	0.0413678	0.0142298	0.0174504	0.944083	1369.43	-10.502	2.55e-21	7.34e-17	DOWN	1.14273	1403.9	-10.263	1.12e-23	1.63e-19	DOWN	2.39741	1159.56	-8.9179	2.03e-16	5.83e-12	DOWN	0.234461	622.627	-7.7574	-11.375	1.01e-10	3.66e-10	DOWN	4.57977	565.825	-6.9489	1.14e-07	3.58e-07	DOWN	2.61578	565.997		2.21e-08	7.33e-08	DOWN
Novel03542	--	0.841534	0.758654	0.0253246	0.0152181	0.633785	0.114325	0.154277	0.172358	5.66041	27.7995	-2.2961	0.13303	0.46092	FALSE	6.49794	28.4993	-2.1329	0.12385	0.42798	FALSE	3.59362	23.5391	-2.7115	0.09221	0.38268	FALSE	0.981385	44.0303	-0.59044	-5.4875	1.04e-10	3.75e-10	DOWN	0.561972	40.1107	-6.1573	6.72e-11	2.68e-10	DOWN	26.5782	40.0189		0.2443	0.34876	FALSE
PGSC0003DMG400020939	Sesquiterpene synthase 2 [Source:PGSC_GENE%3BAcc:PGSC0003DMG400020939]	3.73717	0.275497	0.0184022	0.0215594	0.53633	0.494806	0.00938657	0.0273444	0.873247	59.2251	-6.0837	0.0004595	0.013394	DOWN	2.59489	60.7159	-4.5483	0.001397	0.024024	DOWN	39.4874	50.1486	-0.34482	0.689	0.94412	FALSE	1.79645	492.307	-4.2056	-8.0983	1.46e-07	4.28e-07	DOWN	2.00903	448.739	-7.8032	2.22e-07	6.78e-07	DOWN	24.3053	448.434		0.00035993	0.00082017	DOWN
Novel03436	PREDICTED: uncharacterized protein LOC104230679 [Nicotiana sylvestris]	1.20909	0.069071	0	0.0779059	0	0	0.0265458	0	0.582165	0	Inf	1	1	FALSE	0	0	NA	NA	NA	NA	0	0	NA	NA	NA	NA	0	37.539	-4.5713	#NAME?	6.54e-12	2.55e-11	DOWN	1.71604	34.1629	-4.3153	2.13e-07	6.53e-07	DOWN	1.43586	34.1356		9.6e-08	3.03e-07	DOWN
PGSC0003DMG400013120	Conserved gene of unknown function [Source:PGSC_GENE%3BAcc:PGSC0003DMG400013120]	0.319346	0.00856583	0.00334614	0	2.94562	0.64403	0.0697379	0.440245	5.04282	255.03	-5.6603	2.64e-06	0.00038144	DOWN	32.7872	261.45	-2.9953	0.0018224	0.02929	DOWN	39.8975	215.946	-2.4363	0.024628	0.18178	FALSE	0.256232	32.9861	-5.6631	-7.0083	6.56e-07	1.83e-06	DOWN	0	30.0873	#NAME?	2.83e-07	8.59e-07	DOWN	0.59152	29.9728		3.72e-06	1.03e-05	DOWN
PGSC0003DMG400016877	Conserved gene of unknown function [Source:PGSC_GENE%3BAcc:PGSC0003DMG400016877]	0.861322	0	0.00834121	0	0.2088	0	0	0	0	7.25205	#NAME?	0.037669	0.23178	FALSE	0	7.4346	#NAME?	0.025347	0.17081	FALSE	0	6.14064	#NAME?	0.046588	0.26467	FALSE	0.256232	35.6746	#NAME?	-7.1213	1.02e-06	2.81e-06	DOWN	0	32.4271	#NAME?	3.03e-07	9.16e-07	DOWN	0	32.4401		3.39e-07	1.02e-06	DOWN
PGSC0003DMG401017090	Patatin-3-Kuras 1 [Source:PGSC_GENE%3BAcc:PGSC0003DMG401017090]	18.9836	1.66368	0.851633	0.138132	11.782	1.7226	6.31683	1.92391	317.921	698.614	-1.1358	0.13691	0.46651	FALSE	98.9992	716.2	-2.8549	0.00021312	0.0061819	DOWN	73.391	591.548	-3.0108	0.0012331	0.027118	DOWN	44.6078	1342.39	-3.9588	-4.9114	8.53e-05	0.00019779	DOWN	6.9279	1220.55	-7.4609	1.13e-07	3.56e-07	DOWN	78.5959	1222.14		0.00043016	0.00097246	DOWN
PGSC0003DMG400025449	Extracellular matrix glycoprotein pherophorin-V30 [Source:PGSC_GENE%3BAcc:PGSC0003DMG400025449]	0.753784	0.0113538	0.0112661	0	0	0	0	0	0	0	NA	NA	NA	NA	0	0	NA	NA	NA	NA	0	0	NA	NA	NA	NA	0.324377	29.1952	-6.4901	-6.4919	2.58e-08	7.99e-08	DOWN	0	26.555	#NAME?	1.49e-08	5.02e-08	DOWN	0.29498	26.5167		1.29e-07	4.03e-07	DOWN
Novel00788	PREDICTED: uncharacterized protein LOC102596609 [Solanum tuberosum]	0.569426	0.103228	0.0211352	0	1.6178	0.189345	0.146646	0.122941	4.77381	62.8511	-3.7187	0.0099426	0.10556	FALSE	3.99956	64.4332	-4.0099	0.0033569	0.044622	DOWN	5.2182	53.2189	-3.3503	0.026003	0.18783	FALSE	0.725153	26.3849	-2.9046	-5.1853	1.21e-06	3.3e-06	DOWN	0	24.0109	#NAME?	5.18e-08	1.67e-07	DOWN	3.20574	24.0043		0.0005944	0.0013222	DOWN
PGSC0003DMG400011019	Diphenol oxidase [Source:PGSC_GENE%3BAcc:PGSC0003DMG400011019]	0.149536	0.014154	0.00274097	0.00509549	0.0543282	0.00642354	0	0.0118961	0	7.25205	#NAME?	0.037669	0.23178	FALSE	1.38016	7.4346	-2.4294	0.1957	0.53869	FALSE	0.623368	6.14064	-3.3002	0.16619	0.51626	FALSE	0.324377	23.8068	-3.8445	-6.1976	6.09e-07	1.71e-06	DOWN	0.56997	21.662	-5.2481	8.07e-06	2.15e-05	DOWN	1.50665	21.6425		0.00011529	0.00027643	DOWN
PGSC0003DMG400018942	Autoinhibited calcium ATPase [Source:PGSC_GENE%3BAcc:PGSC0003DMG400018942]	0.0847269	0.0114204	0.00465736	0.00452709	1.23413	0.0230323	0.0081967	0.0137001	1.55295	281.621	-7.5026	1.14e-08	8.18e-06	DOWN	2.6305	288.71	-6.7781	4e-09	1.93e-06	DOWN	3.79335	238.462	-5.9741	1.42e-06	0.00021397	DOWN	0.937843	23.0674	-3.3325	-4.6204	0.00044655	0.00096361	DOWN	0.877083	21.0478	-4.5848	0.00039228	0.00087476	DOWN	2.08151	20.9686		0.0021633	0.0045148	DOWN
PGSC0003DMG400008250	Gene of unknown function [Source:PGSC_GENE%3BAcc:PGSC0003DMG400008250]	0.903829	0.195434	0.0521512	0.129949	0.579999	0.0219325	0.0331594	0.0354211	0.582165	12.0868	-4.3759	0.053337	0.28089	FALSE	0.630723	12.391	-4.2961	0.034784	0.2086	FALSE	0.340624	10.2344	-4.9091	0.041124	0.24768	FALSE	0.959614	22.4705	-2.6505	-4.5494	3.49e-05	8.41e-05	DOWN	2.27188	20.4922	-3.1731	0.00096982	0.0020583	DOWN	3.25102	20.4127		0.0031967	0.0065201	DOWN
PGSC0003DMG400027839	Gene of unknown function [Source:PGSC_GENE%3BAcc:PGSC0003DMG400027839]	1.79487	0.021286	0.0321227	0.113075	1.68049	0.0148909	0.178032	0.459034	4.92322	55.5991	-3.4974	0.017561	0.15102	FALSE	13.0679	56.9986	-2.1249	0.082692	0.34306	FALSE	0.35367	47.0782	-7.0565	0.00026906	0.0095782	DOWN	0.937843	70.8273	-6.8415	-6.2388	0.00048284	0.0010386	DOWN	3.14897	64.4623	-4.3555	0.0035722	0.0070701	DOWN	0.562893	64.5559		0.00026169	0.0006044	DOWN
Novel00110	--	0.423222	0	0.018735	0.0152306	0.0551568	0.020377	0.025931	0	0.913294	2.41735	-1.4043	0.59521	0.89528	FALSE	0	2.4782	#NAME?	0.16193	0.48585	FALSE	0.636415	2.04688	-1.6854	0.55894	0.87146	FALSE	0.725153	22.1204	#NAME?	-4.9309	2.18e-05	5.33e-05	DOWN	0.561972	20.1146	-5.1616	2.34e-05	5.95e-05	DOWN	0	20.1048		1.17e-06	3.38e-06	DOWN
PGSC0003DMG400004548	Proteinase inhibitor type-2 CEVI57 [Source:PGSC_GENE%3BAcc:PGSC0003DMG400004548]	1.12558	0.368529	0.0157796	0.11667	0.0343397	0	0.0324252	0.0209716	0.935363	1.20868	-0.36983	0.94837	1	FALSE	0.630723	1.2391	-0.97421	0.84752	1	FALSE	0	1.02344	#NAME?	0.47952	0.81741	FALSE	0.490693	47.2437	-2.0544	-6.5892	0.00088065	0.0018446	DOWN	3.44995	42.9344	-3.6375	0.015354	0.027662	DOWN	10.3595	43.0293		0.10061	0.1592	FALSE
PGSC0003DMG400033050	Conserved gene of unknown function [Source:PGSC_GENE%3BAcc:PGSC0003DMG400033050]	0.687377	0.215549	0.00815622	0.00921796	0.272225	0.0138701	0	0.0488792	0	9.6694	#NAME?	0.021044	0.16805	FALSE	1.49964	9.9128	-2.7247	0.15005	0.47185	FALSE	0.35367	8.18752	-4.5329	0.064041	0.31509	FALSE	0.256232	29.1251	-2.1203	-6.8287	0.0077984	0.01448	DOWN	0.276987	26.538	-6.5821	0.0093035	0.017344	DOWN	6.11076	26.5685		0.15425	0.23289	FALSE
PGSC0003DMG400000783	Extensin [Source:PGSC_GENE%3BAcc:PGSC0003DMG400000783]	1.97664	12.5675	104.604	395.792	1.82522	18.4223	113.41	335.296	10693.3	207.892	5.6847	0.00010618	0.0048596	UP	32811.4	213.125	7.2663	0.0007449	0.015694	UP	1506.44	176.032	3.0972	0.0052476	0.069176	FALSE	10537.3	268.514	2.2286	5.2944	9.69e-64	2.65e-62	UP	38142.4	244.318	7.2865	0	0	UP	1143.17	243.92		7.02e-19	4.29e-18	UP
PGSC0003DMG400016176	Conserved gene of unknown function [Source:PGSC_GENE%3BAcc:PGSC0003DMG400016176]	0.143181	0.389207	0.574001	117	1.49552	0.271839	0.757049	72.9834	32.3045	76.1465	-1.237	0.30294	0.67769	FALSE	3183.34	78.0633	5.3498	4.43e-06	0.00037511	UP	10.1177	64.4767	-2.6719	0.041596	0.24906	FALSE	25.8217	8.69625	0.9996	1.5701	0.098452	0.15192	FALSE	5039.8	7.92259	9.3132	0	5.09e-305	UP	15.8098	7.90709		0.25968	0.36721	FALSE
PGSC0003DMG400013198	Systemin receptor SR160 [Source:PGSC_GENE%3BAcc:PGSC0003DMG400013198]	0.0179648	0.0990026	0.0990838	33.9004	0.294888	0.471827	0.137061	18.7089	16.0773	41.095	-1.3539	0.31198	0.68548	FALSE	2233.21	42.1294	5.7281	8.58e-07	0.00010899	UP	47.4183	34.797	0.44648	0.91643	1	FALSE	12.1994	2.9869	2.0245	2.0301	0.081808	0.12844	FALSE	3995.56	2.72517	10.518	2.26e-300	2.18e-296	UP	11.0157	2.70753		0.080335	0.12986	FALSE
PGSC0003DMG400021106	Patellin-4 [Source:PGSC_GENE%3BAcc:PGSC0003DMG400021106]	0.0638	1.30435	2.42422	46.6926	0.329826	3.72397	2.43525	36.6096	214.817	35.0516	2.6156	0.053296	0.28089	FALSE	3331.18	35.9339	6.5345	1.75e-07	3.5e-05	UP	289.887	29.6798	3.2879	0.017399	0.14672	FALSE	227.864	8.08783	3.9157	4.8163	5.86e-38	7.34e-37	UP	4198.02	7.36872	9.1541	1.32e-291	9.53e-288	UP	110.719	7.33614		1.06e-17	6.11e-17	UP
PGSC0003DMG401001494	TSI-1 protein [Source:PGSC_GENE%3BAcc:PGSC0003DMG401001494]	2.23284	9.77957	121.904	313.664	0.454273	1.80626	22.4003	55.8451	643.091	15.7128	5.355	3.69e-05	0.0023837	UP	1650.3	16.1083	6.6788	4.77e-08	1.37e-05	UP	45.1789	13.3047	1.7637	0.38702	0.76642	FALSE	3729.73	92.127	1.6898	5.3393	2.34e-77	9.42e-76	UP	9176.52	83.9375	6.7725	1.58e-276	7.62e-273	UP	270.119	83.7272		2.63e-12	1.13e-11	UP
PGSC0003DMG400013983	Wound/stress protein [Source:PGSC_GENE%3BAcc:PGSC0003DMG400013983]	1.35109	7.79191	46.5081	184.464	7.98882	29.1524	113.341	212.151	4506.08	380.733	3.565	0.0017159	0.032289	UP	8663.84	390.317	4.4723	0.00053532	0.01224	UP	1008.69	322.384	1.6456	0.12055	0.44168	FALSE	1960.67	76.7819	2.089	4.6744	9.28e-154	1.96e-151	UP	7434.19	69.7631	6.7356	4.59e-270	1.9e-266	UP	296.519	69.6949		4.97e-11	1.98e-10	UP
PGSC0003DMG400014347	PAR-1c protein [Source:PGSC_GENE%3BAcc:PGSC0003DMG400014347]	1.47488	4.34187	27.4958	172.169	4.81319	6.09497	32.4983	65.9261	1544.51	274.369	2.493	0.013508	0.12741	FALSE	3193.21	281.276	3.505	0.0007904	0.016419	UP	251.736	232.321	0.11579	1	1	FALSE	1386.3	100.258	1.1196	3.7895	8.09e-63	2.15e-61	UP	8301.02	91.1297	6.5092	3.84e-266	1.39e-262	UP	197.648	90.9597		0.0056317	0.011113	UP
PGSC0003DMG400007800	Anthocyanin acyltransferase [Source:PGSC_GENE%3BAcc:PGSC0003DMG400007800]	2.37469	38.0878	218.1	208.033	1.49775	27.2429	120.783	70.0696	9665.08	143.832	6.0703	3.59e-05	0.0023342	UP	5754.43	147.453	5.2863	2.29e-05	0.0012392	UP	1902.79	121.789	3.9657	0.000663	0.017923	UP	18524.1	271.962	3.5644	6.0899	0	0	UP	16898.4	247.304	6.0945	1.24e-265	3.99e-262	UP	2921.02	246.904		2.47e-26	2.13e-25	UP
PGSC0003DMG400000794	Extensin (ext) [Source:PGSC_GENE%3BAcc:PGSC0003DMG400000794]	6.68926	56.2204	670.866	1117.4	4.0838	48.4299	741.381	952.286	14386.5	95.4854	7.2352	1.9e-05	0.0015062	UP	19097.6	97.8889	7.608	3.29e-05	0.0015864	UP	820.341	80.8518	3.3429	0.0047484	0.065071	FALSE	13871.3	186.52	2.6308	6.2166	6.88e-87	3.44e-85	UP	22096.6	169.58	7.0257	3e-262	8.68e-259	UP	1049.93	169.519		6.89e-16	3.62e-15	UP
PGSC0003DMG400031098	Conserved gene of unknown function [Source:PGSC_GENE%3BAcc:PGSC0003DMG400031098]	0.0588506	0.0811845	0.103085	13.8845	0.198507	0.103513	0.105611	10.7797	21.8882	49.5557	-1.1789	0.35033	0.72497	FALSE	2306.25	50.8031	5.5045	1.74e-06	0.00018484	UP	18.7196	41.961	-1.1645	0.33337	0.71571	FALSE	22.7439	17.5255	0.024329	0.37603	0.54566	0.67363	FALSE	2930.96	15.9703	7.5198	7.16e-231	1.48e-227	UP	16.2003	15.9294		0.98634	1	FALSE
PGSC0003DMG400001119	Histone H3.2 [Source:PGSC_GENE%3BAcc:PGSC0003DMG400001119]	0.306444	1.5149	81.3261	80.9753	1.51854	1.66202	65.9008	46.8805	2099.8	58.0164	5.1777	1.13e-05	0.0010759	UP	1532.63	59.4768	4.6875	1.49e-05	0.00090618	UP	46.1469	49.1251	-0.090227	0.8163	1	FALSE	2748.64	13.9617	1.8675	7.6211	2.36e-147	4.14e-145	UP	2616.55	12.6915	7.6877	3.01e-227	5.8e-224	UP	46.2183	12.6661		0.036498	0.063367	FALSE
PGSC0003DMG400008938	Endo-1%2C4-beta-glucanase [Source:PGSC_GENE%3BAcc:PGSC0003DMG400008938]	0.292905	0.922722	11.1021	36.7873	1.90951	14.4096	31.0874	13.494	2952.56	217.562	3.7625	0.00067347	0.016979	UP	1308.17	223.038	2.5522	0.0071634	0.075415	FALSE	1194.3	184.219	2.6967	0.014779	0.13297	FALSE	1118.73	39.794	1.2172	4.8132	8.82e-84	4.12e-82	UP	3544.84	36.1527	6.6155	6.74e-225	1.22e-221	UP	83.9463	36.1074		0.0029001	0.0059531	UP
PGSC0003DMG400002790	Conserved gene of unknown function [Source:PGSC_GENE%3BAcc:PGSC0003DMG400002790]	1.08201	25.8642	98.3077	110.027	1.82536	86.9472	222.763	261.111	8477.41	83.3986	6.6675	6.15e-06	0.0007149	UP	10243.9	85.4979	6.9047	5.36e-06	0.00042763	UP	2891.04	70.6174	5.3554	2.88e-05	0.001863	UP	3972.28	58.9552	4.14	6.0742	7.01e-103	5.11e-101	UP	4252.13	53.608	6.3096	4.53e-224	7.7e-221	UP	943.696	53.5246		3.76e-90	2.53e-88	UP
PGSC0003DMG400015815	Pectase lyase [Source:PGSC_GENE%3BAcc:PGSC0003DMG400015815]	0.0390919	0.0499441	0.745095	19.3204	0.57058	0.45612	1.3293	2.78363	131.325	67.6858	0.95621	0.52942	0.84883	FALSE	280.65	69.3896	2.016	0.070623	0.31398	FALSE	39.3543	57.3126	-0.54233	0.59089	0.88925	FALSE	78.1312	5.52851	-0.083813	3.8209	1.38e-06	3.76e-06	UP	1939.62	5.01451	8.5954	4.52e-213	5.69e-210	UP	4.72904	5.01191		0.98866	1	FALSE
PGSC0003DMG400030391	Bipolar kinesin KRP-130 [Source:PGSC_GENE%3BAcc:PGSC0003DMG400030391]	0.107723	0.145789	1.2851	12.8558	0.901297	0.0986774	1.48968	8.66804	315.477	229.648	0.45811	0.73789	0.96876	FALSE	1891.4	235.429	3.0061	0.0022215	0.033415	UP	18.1792	194.454	-3.4191	0.0025681	0.043917	DOWN	289.622	32.7341	-0.0036627	3.1453	6.61e-29	5.78e-28	UP	2769.95	29.7725	6.5397	1.94e-204	1.87e-201	UP	29.6623	29.7377		0.94065	1	FALSE
PGSC0003DMG400008137	Glucosyltransferase [Source:PGSC_GENE%3BAcc:PGSC0003DMG400008137]	0.330665	0.368461	8.4932	31.8281	0.719721	0.241588	7.45937	5.39214	738.314	85.8159	3.1049	0.0046603	0.064118	FALSE	550.517	87.9761	2.6456	0.01043	0.097809	FALSE	20.9809	72.6642	-1.7922	0.13679	0.46737	FALSE	895.708	47.021	-0.28436	4.2517	1.51e-22	1.01e-21	UP	3209.4	42.7703	6.2296	3.91e-204	3.65e-201	UP	35.0791	42.7217		0.6158	0.75132	FALSE
PGSC0003DMG400004660	Serine hydroxymethyltransferase [Source:PGSC_GENE%3BAcc:PGSC0003DMG400004660]	0.24211	7.20678	20.2367	28.3083	0.553198	18.0511	55.4272	67.4644	5152.68	61.6424	6.3853	2.18e-06	0.00033494	UP	6436.28	63.1941	6.6703	1.1e-06	0.00012979	UP	1464.35	52.1954	4.8102	9.63e-05	0.0045328	UP	1994.31	32.1763	4.4561	5.9537	7.15e-197	3.67e-194	UP	2668.89	29.2811	6.5101	2.41e-201	2.05e-198	UP	641.274	29.2168		4.26e-24	3.3e-23	UP
PGSC0003DMG402027210	Glucosyltransferase [Source:PGSC_GENE%3BAcc:PGSC0003DMG402027210]	0.75084	4.12494	87.7849	125.874	2.31434	6.58884	88.7293	82.9353	4277.75	134.163	4.9948	4.51e-05	0.0026889	UP	4112.44	137.54	4.9021	2.65e-05	0.0013668	UP	279.983	113.602	1.3014	0.31788	0.69929	FALSE	4501.61	51.9124	2.0187	6.4382	2.11e-135	2.8e-133	UP	6169.41	47.2353	7.0291	7.73e-197	6.21e-194	UP	190.956	47.1251		1.83e-10	7.05e-10	UP
PGSC0003DMG400024344	Anthocyanidin 3-O-glucosyltransferase [Source:PGSC_GENE%3BAcc:PGSC0003DMG400024344]	2.10799	40.8392	215.398	326.583	2.58496	29.5127	295.929	402.511	27597.6	288.873	6.578	0.00088513	0.020615	UP	38588.1	296.145	7.0257	0.0019807	0.030858	UP	2378.15	244.602	3.2813	0.0032474	0.050876	FALSE	21287.5	280.918	3.8365	6.2437	6.58e-169	1.91e-166	UP	30897.7	255.333	6.919	1.71e-196	1.34e-193	UP	3644.25	255.092		2.01e-10	7.72e-10	UP
PGSC0003DMG400033073	Conserved gene of unknown function [Source:PGSC_GENE%3BAcc:PGSC0003DMG400033073]	0.0625894	0.160169	1.40199	45.5718	0.0729333	0.182223	1.3261	26.5459	110.096	7.25205	3.9242	0.025074	0.18607	FALSE	2262.48	7.4346	8.2494	1.08e-09	7.13e-07	UP	12.9589	6.14064	1.0775	0.76129	0.98295	FALSE	123.287	7.42161	0.91415	4.0541	4.37e-19	2.48e-18	UP	3831.42	6.74598	9.1496	1.03e-194	7.82e-192	UP	12.7107	6.74501		0.31931	0.43797	FALSE
PGSC0003DMG400012298	98b [Source:PGSC_GENE%3BAcc:PGSC0003DMG400012298]	0.0288378	0.033394	0.0589532	16.1797	0.0791232	0.0241533	0.104541	13.0836	10.4297	9.6694	0.1092	1	1	FALSE	1369.13	9.9128	7.1098	1.8e-08	6.88e-06	UP	2.10802	8.18752	-1.9575	0.31842	0.69948	FALSE	6.3629	4.20509	-0.22507	0.59755	0.63927	0.7617	FALSE	1671.76	3.84023	8.766	1.16e-189	7.66e-187	UP	3.26143	3.81207		0.98672	1	FALSE
PGSC0003DMG400014250	Serine carboxypeptidase [Source:PGSC_GENE%3BAcc:PGSC0003DMG400014250]	0.204281	1.41503	14.644	24.6857	0.527633	7.29637	35.8945	42.4507	2870.49	50.7644	5.8213	2.66e-06	0.00038196	UP	3497.63	52.0422	6.0706	7.16e-07	9.61e-05	UP	507.339	42.9845	3.5611	0.0044497	0.062818	FALSE	1245.98	23.4443	2.3514	5.7319	7.18e-79	2.97e-77	UP	2008.6	21.3563	6.5554	1.09e-181	6.58e-179	UP	108.71	21.3019		9.26e-10	3.4e-09	UP
PGSC0003DMG400023751	Basic blue copper protein [Source:PGSC_GENE%3BAcc:PGSC0003DMG400023751]	1.50137	8.9758	23.1301	137.755	32.5646	7.79749	21.4203	84.3093	327.554	594.668	-0.86035	0.27901	0.64905	FALSE	1314.46	609.637	1.1084	0.21678	0.56482	FALSE	102.2	503.533	-2.3007	0.016582	0.1423	FALSE	373.684	32.6947	2.1427	3.5147	1.74e-16	8.72e-16	UP	2128	29.7184	6.162	5.7e-179	3.3e-176	UP	130.928	29.6504		0.00019032	0.00044636	UP
PGSC0003DMG400029645	Pectase lyase [Source:PGSC_GENE%3BAcc:PGSC0003DMG400029645]	0.457852	3.55123	26.4207	59.2445	1.62858	6.89198	72.9636	48.5814	7426.79	199.431	5.2188	9.5e-05	0.0045734	UP	5094.55	204.452	4.6391	8.79e-05	0.0032389	UP	611.93	168.868	1.8575	0.098474	0.39671	FALSE	2861.24	66.87	2.515	5.4191	1.22e-99	8.34e-98	UP	6134.18	60.8476	6.6555	1.33e-178	7.54e-176	UP	347.223	60.7452		2.21e-26	1.92e-25	UP
PGSC0003DMG400017152	Acid phosphatase 1 [Source:PGSC_GENE%3BAcc:PGSC0003DMG400017152]	0.0746518	2.10459	6.48851	24.2554	0.210646	3.94536	9.34934	9.00916	537.249	14.5041	5.2111	8.48e-05	0.0042243	UP	531.033	14.8692	5.1584	2.89e-05	0.0014612	UP	197.121	12.2813	4.0045	0.010227	0.10566	FALSE	395.227	6.12972	4.3796	6.0107	2.59e-70	8.61e-69	UP	1412.68	5.57197	7.986	3.33e-176	1.82e-173	UP	115.745	5.56038		1.56e-17	8.91e-17	UP
PGSC0003DMG400010003	B2-type cyclin dependent kinase [Source:PGSC_GENE%3BAcc:PGSC0003DMG400010003]	0.106004	0.261898	0.707769	28.5657	0.272347	0.443702	0.761853	18.7325	50.5902	21.7562	1.2174	0.54488	0.86047	FALSE	1282	22.3038	5.845	5.62e-07	8.02e-05	UP	25.6765	18.4219	0.47902	0.9139	1	FALSE	49.9825	10.1039	0.86454	2.3065	0.00066283	0.0014075	UP	1929.31	9.22429	7.7084	6.73e-176	3.54e-173	UP	16.7226	9.1844		0.39136	0.51982	FALSE
PGSC0003DMG401018143	Conserved gene of unknown function [Source:PGSC_GENE%3BAcc:PGSC0003DMG401018143]	0.153174	0.0708674	2.16876	37.4513	0.405909	0.110561	1.24639	22.2894	95.7011	37.4689	1.3528	0.39714	0.7614	FALSE	1763.12	38.4121	5.5204	1.3e-06	0.00014746	UP	7.43751	31.7266	-2.0928	0.13837	0.46841	FALSE	177.083	16.8649	-1.548	3.3923	6.81e-22	4.4e-21	UP	2922.76	15.3567	7.5723	7.91e-172	3.88e-169	UP	5.23	15.2935		0.17377	0.25896	FALSE
PGSC0003DMG400018371	Axoneme-associated protein mst101 [Source:PGSC_GENE%3BAcc:PGSC0003DMG400018371]	0.00598476	0.0268605	0.0480387	11.8144	0.116	0.00429839	0.0280445	6.82903	2.68186	13.2954	-2.3096	0.2068	0.5651	FALSE	671.201	13.6301	5.6219	4.78e-06	0.00039472	UP	0.35367	11.2578	-4.9924	0.033446	0.21974	FALSE	4.86338	0.817875	1.7208	2.572	0.22609	0.31919	FALSE	1145.02	0.742508	10.591	1.03e-171	4.97e-169	UP	2.45196	0.74388		0.60455	0.74012	FALSE
PGSC0003DMG400022281	Lipid binding protein [Source:PGSC_GENE%3BAcc:PGSC0003DMG400022281]	0.0791842	0.0668753	0.173665	31.3257	0.221205	0.120554	0.461643	23.4447	21.2351	12.0868	0.81302	0.81464	1	FALSE	1097.42	12.391	6.4687	1.42e-07	2.99e-05	UP	4.78818	10.2344	-1.0959	0.48587	0.82059	FALSE	8.38556	5.16166	-0.67879	0.70007	0.48466	0.61111	FALSE	1449.04	4.70697	8.2661	4.09e-170	1.94e-167	UP	2.92273	4.6787		0.7688	0.8888	FALSE
PGSC0003DMG400008978	Xyloglucanase inhibitor [Source:PGSC_GENE%3BAcc:PGSC0003DMG400008978]	0.244052	0.887977	7.79602	22.7586	1.58212	19.955	8.19227	65.3774	685.1	158.336	2.1133	0.043639	0.25182	FALSE	5629.49	162.322	5.1161	3.61e-05	0.0016932	UP	1438.8	134.071	3.4238	0.0028205	0.046201	UP	689.675	29.1364	1.4221	4.565	2.29e-08	7.12e-08	UP	1926.8	26.5564	6.181	1.52e-169	7.07e-167	UP	70.9573	26.4789		0.039988	0.068943	FALSE
PGSC0003DMG400026274	Phytocyanin-like arabinogalactan-protein [Source:PGSC_GENE%3BAcc:PGSC0003DMG400026274]	0.0339893	0.0858154	0.14791	30.2213	0.138005	0.0717665	0.0993539	22.2883	3.59515	6.04338	-0.7493	0.64729	0.92769	FALSE	836.204	6.1955	7.0765	8.42e-08	2.09e-05	UP	2.32649	5.1172	-1.1372	0.5254	0.8496	FALSE	5.73009	1.77445	0.89658	1.6912	0.31283	0.42404	FALSE	1119.32	1.60924	9.442	3.23e-166	1.4e-163	UP	2.9982	1.61051		0.69126	0.819	FALSE
PGSC0003DMG400039856	Beta-glucan-elicitor receptor [Source:PGSC_GENE%3BAcc:PGSC0003DMG400039856]	0.0693534	3.66206	2.45122	10.5929	0.26447	4.12486	3.3659	9.78931	423.066	39.8863	3.4069	0.0055297	0.072372	FALSE	1266.28	40.8903	4.9527	7.44e-06	0.00053869	UP	448.099	33.7735	3.7299	0.0041751	0.060378	FALSE	327.149	12.4718	5.2836	4.7132	2.12e-10	7.53e-10	UP	1351.54	11.3271	6.8987	3.49e-160	1.26e-157	UP	441.077	11.3236		4.58e-20	2.96e-19	UP
PGSC0003DMG400014093	Flavonol synthase [Source:PGSC_GENE%3BAcc:PGSC0003DMG400014093]	2.40598	48.9537	356.577	298.735	4.50258	43.9029	387.647	475.334	29114.8	406.115	6.1637	0.0018219	0.033631	UP	36770.7	416.338	6.4647	0.0029621	0.040681	UP	2863.02	343.876	3.0576	0.0058841	0.074391	FALSE	28446.1	258.783	3.9071	6.7803	0	0	UP	22812.9	235.205	6.5998	5.12e-158	1.79e-155	UP	3526.14	235.047		4.39e-16	2.33e-15	UP
PGSC0003DMG400003013	Beta-D-glucan exohydrolase [Source:PGSC_GENE%3BAcc:PGSC0003DMG400003013]	0.173486	3.91562	3.69738	52.6953	1.08821	4.21057	2.61203	39.0155	246.132	123.285	0.99744	0.41627	0.76284	FALSE	3786.14	126.388	4.9048	2.23e-05	0.0012201	UP	345.486	104.391	1.7266	0.16337	0.512	FALSE	370.584	23.4366	4.0569	3.983	1.88e-36	2.21e-35	UP	5048.33	21.2925	7.8893	3.15e-153	9.9e-151	UP	354.221	21.2821		6.02e-26	5.1e-25	UP
PGSC0003DMG400029562	Cytochrome P450 [Source:PGSC_GENE%3BAcc:PGSC0003DMG400029562]	0.00604519	0.297457	4.39701	20.7303	0.372817	1.82849	10.5443	53.2328	996.333	42.3036	4.5578	8.98e-05	0.0043809	UP	5181.7	43.3685	6.9006	2.64e-07	4.57e-05	UP	149.747	35.8204	2.0637	0.16317	0.51177	FALSE	441.471	0.817875	5.1796	9.0762	4.51e-20	2.68e-19	UP	1988.52	0.742508	11.387	9.64e-153	3e-150	UP	26.9605	0.74388		0.00030229	0.00069424	UP
PGSC0003DMG400025228	Gamma aminobutyrate transaminase isoform2 [Source:PGSC_GENE%3BAcc:PGSC0003DMG400025228]	0.0179143	0.0198688	0.559903	35.1431	0.0393426	0.0976998	1.69301	32.7386	129.672	3.62603	5.1603	0.0054867	0.071875	FALSE	2586.42	3.7173	9.4425	1.16e-10	1.2e-07	UP	6.58927	3.07032	1.1017	0.90921	1	FALSE	45.6262	1.96959	-0.29175	4.5339	4.27e-07	1.21e-06	UP	2740.19	1.79502	10.576	2.44e-152	7.5e-150	UP	1.46293	1.7908		0.99125	1	FALSE
PGSC0003DMG400021912	FH protein NFH2 [Source:PGSC_GENE%3BAcc:PGSC0003DMG400021912]	0.224244	3.1143	11.332	25.9869	3.29299	13.8679	24.9132	20.1233	2271.85	361.394	2.6522	0.0096154	0.10314	FALSE	1890.06	370.491	2.3509	0.013197	0.11304	FALSE	1107.91	306.009	1.8562	0.079944	0.35934	FALSE	1099.98	29.3482	3.3573	5.2281	7.32e-129	8.77e-127	UP	2412.41	26.6821	6.4985	3.78e-150	1.09e-147	UP	272.934	26.6321		1.13e-32	1.27e-31	UP
Novel00434	PREDICTED: probable 2-oxoglutarate-dependent dioxygenase AOP1.2 [Solanum lycopersicum]	0.162481	0.33679	7.96887	28.547	2.23034	0.319895	10.3934	17.309	1760.02	456.879	1.9457	0.048288	0.26822	FALSE	3041.46	468.38	2.699	0.0069519	0.073765	FALSE	47.7447	386.86	-3.0184	0.0022531	0.040379	DOWN	1444.11	39.6853	0.61453	5.1854	3.11e-40	4.19e-39	UP	4943.72	36.0314	7.1002	7.37e-148	2.07e-145	UP	55.0951	35.9849		0.30813	0.42515	FALSE
PGSC0003DMG400012640	Pectate lyase P18 [Source:PGSC_GENE%3BAcc:PGSC0003DMG400012640]	0.693465	5.25852	41.147	88.9741	2.30904	24.1932	71.1196	30.7919	5867.18	228.44	4.6828	0.00018175	0.0070021	UP	2594.24	234.19	3.4696	0.00070176	0.014964	UP	1732.7	193.43	3.1631	0.0046313	0.064199	FALSE	3601.05	81.8029	2.4847	5.4601	1.59e-150	3.13e-148	UP	7442.49	74.2811	6.6466	9.68e-148	2.69e-145	UP	415.532	74.2386		3.8e-10	1.44e-09	UP
PGSC0003DMG400018674	Cyclin B2 [Source:PGSC_GENE%3BAcc:PGSC0003DMG400018674]	0.0186287	0.0368691	0.0711548	12.0698	0.0790846	0.0409681	0.084087	8.09139	6.488	7.25205	-0.16062	0.84317	1	FALSE	635.576	7.4346	6.4177	9.67e-07	0.00011929	UP	2.68751	6.14064	-1.1921	0.48766	0.82212	FALSE	5.76052	2.03754	0.53509	1.4994	0.57115	0.69954	FALSE	936.082	1.85484	8.9792	2.56e-146	7e-144	UP	2.7001	1.86338		0.97482	1	FALSE
PGSC0003DMG400029700	Proline-rich protein 1 [Source:PGSC_GENE%3BAcc:PGSC0003DMG400029700]	0.273656	0.189573	2.00335	35.7921	13.8679	3.40958	17.7465	36.5745	1065.9	999.575	0.09269	0.99626	1	FALSE	2253.92	1024.74	1.1372	0.21615	0.56367	FALSE	179.567	846.385	-2.2368	0.0077062	0.088244	FALSE	127.745	23.5265	-0.97104	2.4409	5.45e-11	2.01e-10	UP	2181.06	21.419	6.67	3.08e-146	8.34e-144	UP	10.9002	21.3671		0.19977	0.29242	FALSE
PGSC0003DMG400000733	Syntaxin [Source:PGSC_GENE%3BAcc:PGSC0003DMG400000733]	0.00445033	0.00482338	0.0995147	13.1898	0	0.0112164	0.0855273	8.17677	5.4479	0	Inf	0.45979	0.79756	FALSE	536.046	0	Inf	1.51e-08	5.9e-06	UP	0.623368	0	Inf	1	1	FALSE	6.7173	0.406065	-0.31979	4.0481	0.11892	0.17994	FALSE	852.791	0.371687	11.164	2.88e-145	7.71e-143	UP	0.29498	0.36818		1	1	FALSE
PGSC0003DMG400009396	Arabinogalactan-protein [Source:PGSC_GENE%3BAcc:PGSC0003DMG400009396]	0.262989	0.758333	8.71291	34.5787	0.703959	3.75778	28.0518	19.0253	2481.07	74.9379	5.0491	1.87e-05	0.0014942	UP	1727.62	76.8242	4.4911	2.65e-05	0.0013668	UP	289.879	63.4533	2.1917	0.092394	0.38311	FALSE	820.424	33.3839	1.0911	4.6191	2.56e-96	1.63e-94	UP	3111.96	30.3377	6.6806	9.58e-145	2.54e-142	UP	64.4878	30.2716		0.056945	0.094977	FALSE
PGSC0003DMG400026933	Hydrogen peroxide-induced 1 [Source:PGSC_GENE%3BAcc:PGSC0003DMG400026933]	2.35874	3.8223	124.492	414.15	15.3499	13.5824	237.98	262.45	6981.78	540.278	3.6918	0.0024791	0.041643	UP	7918.1	553.878	3.8375	0.0017388	0.028346	UP	347.119	457.478	-0.39827	0.57676	0.87972	FALSE	3876.58	98.9975	0.25731	5.2912	9.92e-60	2.43e-58	UP	12324.2	89.9359	7.0984	2.79e-143	7.16e-141	UP	107.446	89.8949		0.59021	0.72544	FALSE
PGSC0003DMG400009375	Reticulon B17 [Source:PGSC_GENE%3BAcc:PGSC0003DMG400009375]	0.00965404	0.00366735	0.0384701	10.0741	0.0721281	0.00454583	0.0206184	7.05682	1.74649	7.25205	-2.0539	0.32133	0.69627	FALSE	607.875	7.4346	6.3534	1.34e-06	0.00014977	UP	0.340624	6.14064	-4.1721	0.10521	0.41115	FALSE	3.41591	1.15746	-1.8378	1.5613	0.52604	0.65437	FALSE	856.333	1.05165	9.6694	2.7e-142	6.74e-140	UP	0.29498	1.05444		0.80147	0.91139	FALSE
PGSC0003DMG400005960	Glucosyltransferase [Source:PGSC_GENE%3BAcc:PGSC0003DMG400005960]	1.1252	5.65444	63.8245	100.554	13.8764	22.5479	165.177	164.74	14384.8	1452.83	3.3076	0.018167	0.15452	FALSE	14763.3	1489.4	3.3092	0.017003	0.13371	FALSE	1713.85	1230.17	0.47838	0.67371	0.93669	FALSE	5911.13	140.502	1.8905	5.3948	1.28e-118	1.26e-116	UP	8900.3	127.845	6.1214	8.67e-140	2.09e-137	UP	472.768	127.51		8.46e-14	3.97e-13	UP
PGSC0003DMG400023364	Conserved gene of unknown function [Source:PGSC_GENE%3BAcc:PGSC0003DMG400023364]	0.0804501	0.0277221	0.0366717	19.6841	0	0.0306495	0.0395482	14.6285	1.77319	0	Inf	0.90257	1	FALSE	678.436	0	Inf	2.35e-09	1.33e-06	UP	1.18886	0	Inf	0.96297	1	FALSE	1.75291	5.18892	-1.9742	-1.5657	0.64995	0.77196	FALSE	900.666	4.70537	7.5805	5.67e-137	1.29e-134	UP	1.19657	4.70135		0.52704	0.66282	FALSE
PGSC0003DMG400009411	UDP-glucosyltransferase [Source:PGSC_GENE%3BAcc:PGSC0003DMG400009411]	0.0432752	0.0716426	3.38538	21.932	0.0796131	0.0131866	0.267405	0.247704	20.1046	7.25205	1.4711	0.60665	0.90285	FALSE	19.292	7.4346	1.3757	0.57707	0.8822	FALSE	0.848233	6.14064	-2.8559	0.22631	0.59514	FALSE	272.813	4.70061	0.28466	5.8589	4.43e-32	4.41e-31	UP	1689.01	4.271	8.6274	1.9e-136	4.29e-134	UP	5.1989	4.26795		0.87195	0.97116	FALSE
PGSC0003DMG400005123	Conserved gene of unknown function [Source:PGSC_GENE%3BAcc:PGSC0003DMG400005123]	0.0128719	0.0183714	0.0174847	6.71741	0.0412866	0.0421219	0.0497475	5.4616	6.13169	6.04338	0.020929	1	1	FALSE	685.377	6.1955	6.7895	3.41e-07	5.35e-05	UP	4.4606	5.1172	-0.19812	0.83085	1	FALSE	2.26254	2.24699	0.072925	0.0099549	0.98525	1	FALSE	831.331	2.04348	8.6683	1.61e-135	3.54e-133	UP	2.14189	2.03631		1	1	FALSE
PGSC0003DMG400025261	Histone H3.2 [Source:PGSC_GENE%3BAcc:PGSC0003DMG400025261]	0.225205	0.911012	16.0744	32.018	0.7687	0.893033	19.2902	20.6602	583.551	27.7995	4.3917	0.00039406	0.012076	UP	639.73	28.4993	4.4885	8.93e-05	0.0032758	UP	23.4098	23.5391	-0.0079485	0.87494	1	FALSE	514.115	9.71502	1.5732	5.7257	7.55e-82	3.35e-80	UP	979.157	8.85001	6.7897	2.6e-132	5.3e-130	UP	26.3016	8.83878		0.0293	0.051885	FALSE
PGSC0003DMG400032112	Histone H3.2 [Source:PGSC_GENE%3BAcc:PGSC0003DMG400032112]	0.346584	0.629368	28.0279	31.3843	0.30032	1.57845	20.8083	14.4242	698.324	12.0868	5.8524	9.85e-06	0.00096725	UP	495.75	12.391	5.3222	2.49e-05	0.0013214	UP	45.9469	10.2344	2.1665	0.27998	0.65726	FALSE	997.775	16.632	0.4229	5.9067	8.64e-135	1.12e-132	UP	1068.15	15.1041	6.144	1.7e-131	3.4e-129	UP	20.2342	15.0932		0.57798	0.71321	FALSE
PGSC0003DMG400007155	Anthranilate N-benzoyltransferase protein [Source:PGSC_GENE%3BAcc:PGSC0003DMG400007155]	0.268435	1.86709	26.4181	29.9346	0.380937	7.30701	23.3145	49.3097	1908.67	37.4689	5.6707	3.07e-06	0.00041573	UP	4156.72	38.4121	6.7577	1.81e-07	3.55e-05	UP	524.69	31.7266	4.0477	0.0019092	0.03594	UP	2297.31	31.4914	2.3591	6.1888	1.42e-20	8.67e-20	UP	2489.14	28.6636	6.4403	9.8e-130	1.93e-127	UP	146.672	28.5881		2.22e-06	6.24e-06	UP
PGSC0003DMG400030734	Conserved gene of unknown function [Source:PGSC_GENE%3BAcc:PGSC0003DMG400030734]	0.0154997	0.00353757	0.0465035	13.2008	0.109775	0.0326944	0.0702467	8.51333	6.45721	12.0868	-0.90444	0.55382	0.86725	FALSE	802.546	12.391	6.0172	1.03e-06	0.00012363	UP	2.66711	10.2344	-1.9401	0.26863	0.64633	FALSE	4.52007	2.03607	-2.5756	1.1506	0.51851	0.64662	FALSE	1228.71	1.85757	9.3695	1.28e-129	2.48e-127	UP	0.310073	1.84842		0.5533	0.68819	FALSE
PGSC0003DMG400031800	Cellulose synthase A catalytic subunit 3 [UDP-forming] [Source:PGSC_GENE%3BAcc:PGSC0003DMG400031800]	0.00870028	0.0350196	0.0474622	10.6076	0.0138609	0.0346355	0.0666011	7.12837	14.61	3.62603	2.0105	0.52263	0.84398	FALSE	1597.69	3.7173	8.7475	4.44e-10	3.38e-07	UP	6.51073	3.07032	1.0844	0.86188	1	FALSE	10.9806	2.71525	1.5634	2.0158	0.11471	0.17423	FALSE	2345.68	2.47585	9.8879	5.45e-129	1.03e-126	UP	7.29863	2.46954		0.44507	0.57861	FALSE
PGSC0003DMG400018588	Myb [Source:PGSC_GENE%3BAcc:PGSC0003DMG400018588]	0.00885032	0.219984	0.50539	4.08453	0.0220411	0.280361	0.398134	2.91232	72.9638	4.8347	3.9157	0.048138	0.26782	FALSE	547.408	4.9564	6.7872	9.42e-07	0.0001172	UP	44.4117	4.09376	3.4394	0.11337	0.42713	FALSE	98.0859	2.31493	4.1923	5.405	2.33e-19	1.34e-18	UP	758.08	2.1033	8.4936	3.51e-127	6.28e-125	UP	38.5537	2.10889		2.48e-07	7.58e-07	UP
PGSC0003DMG400021197	Vacuolar protein sorting-associated protein 2 homolog 2 [Source:PGSC_GENE%3BAcc:PGSC0003DMG400021197]	0.179522	0.3535	0.347679	22.9018	1.69326	3.54559	2.15707	15.1353	79.5175	74.9379	0.085578	1	1	FALSE	573.605	76.8242	2.9004	0.0055999	0.064307	FALSE	113.236	63.4533	0.83557	0.58819	0.88701	FALSE	13.6163	9.47344	0.5376	0.52337	0.52348	0.65155	FALSE	857.411	8.60368	6.6389	1.16e-122	1.83e-120	UP	12.4849	8.60104		0.49576	0.63105	FALSE
PGSC0003DMG400014987	Conserved gene of unknown function [Source:PGSC_GENE%3BAcc:PGSC0003DMG400014987]	0.00329671	0.00523662	0.00893863	3.80705	0.0406628	0.0128064	0.0317435	2.55776	5.4746	8.46073	-0.62803	0.65597	0.93191	FALSE	455.794	8.6737	5.7156	1.51e-05	0.00091322	UP	1.94103	7.16408	-1.884	0.32708	0.70824	FALSE	1.64122	0.817875	0.22828	1.0048	0.80693	0.90762	FALSE	669.874	0.742508	9.8173	2.81e-122	4.4e-120	UP	0.871407	0.74388		1	1	FALSE
PGSC0003DMG400023362	Alcohol dehydrogenase [Source:PGSC_GENE%3BAcc:PGSC0003DMG400023362]	0.187382	1.4837	5.65787	16.093	1.00312	4.89076	25.2191	31.4166	1591.64	76.1465	4.3856	9.73e-05	0.0046356	UP	2039.3	78.0633	4.7073	1.58e-05	0.00094426	UP	269.07	64.4767	2.0611	0.1081	0.41664	FALSE	379.887	16.9615	2.5457	4.4852	1.62e-53	3.28e-52	UP	1034.17	15.4122	6.0683	7.13e-122	1.1e-119	UP	89.9393	15.4037		2.58e-09	9.2e-09	UP
PGSC0003DMG400001358	Hydroxyproline-rich protein [Source:PGSC_GENE%3BAcc:PGSC0003DMG400001358]	0.0617264	0.0968563	0.115626	21.65	0.0312555	0.267764	0.297427	16.0626	9.64577	1.20868	2.9965	0.44636	0.78687	FALSE	532.453	1.2391	8.7472	8.09e-08	2.03e-05	UP	7.56631	1.02344	2.8862	0.51513	0.84268	FALSE	3.95014	2.8482	0.20828	0.47185	0.78871	0.8915	FALSE	707.912	2.60094	8.0884	3.84e-120	5.73e-118	UP	2.98623	2.58478		0.9847	1	FALSE
PGSC0003DMG400007172	B-type cyclin [Source:PGSC_GENE%3BAcc:PGSC0003DMG400007172]	0.040197	0.110395	0.0534994	18.6743	0.0991655	0.00657006	0.187053	15.0796	9.6334	6.04338	0.67269	0.96179	1	FALSE	787.674	6.1955	6.9902	1.26e-07	2.73e-05	UP	0.282744	5.1172	-4.1778	0.13853	0.46841	FALSE	2.87884	2.92189	1.0125	-0.021412	1	1	FALSE	962.14	2.65989	8.4987	6.18e-119	9.13e-117	UP	5.37611	2.66487		0.69846	0.82583	FALSE
PGSC0003DMG400027200	Family 1 glycosyltransferase [Source:PGSC_GENE%3BAcc:PGSC0003DMG400027200]	0.0931049	0.501197	11.1524	15.8455	0.78601	1.04394	16.0458	15.7377	758.754	44.721	4.0846	0.00046077	0.013417	UP	766.484	45.8467	4.0634	0.00018699	0.0055712	UP	43.4196	37.8673	0.19739	1	1	FALSE	561.332	6.31913	1.9907	6.473	7.79e-52	1.51e-50	UP	762.242	5.75861	7.0484	2.23e-118	3.27e-116	UP	22.7851	5.73315		0.0097168	0.018573	UP
PGSC0003DMG400003563	Flavanone 3 beta-hydroxylase [Source:PGSC_GENE%3BAcc:PGSC0003DMG400003563]	2.70505	29.8411	422.072	466.916	3.26336	25.6179	463.1	551.575	27071.3	228.44	6.8888	0.00054625	0.014995	UP	33091.2	234.19	7.1426	0.00088965	0.017748	UP	1295.05	193.43	2.7431	0.011645	0.11483	FALSE	26131.4	225.834	3.0237	6.8544	0	0	UP	27675.5	205.45	7.0737	3.92e-118	5.7e-116	UP	1667.98	205.106		6.87e-22	4.83e-21	UP
PGSC0003DMG400009759	Cytochrome P450 71D7 [Source:PGSC_GENE%3BAcc:PGSC0003DMG400009759]	0.198613	0.0899109	3.11536	26.7186	0.67783	0.764624	19.2277	51.6309	570.238	24.1735	4.5601	0.00029405	0.0097702	UP	1577.21	24.782	5.9919	3.22e-07	5.24e-05	UP	19.7993	20.4688	-0.047974	0.83436	1	FALSE	98.2836	8.44612	-1.5848	3.5406	8.6e-13	3.53e-12	UP	805.954	7.67254	6.7148	4.72e-118	6.84e-116	UP	2.56164	7.68422		0.26385	0.37246	FALSE
PGSC0003DMG400008811	Major latex [Source:PGSC_GENE%3BAcc:PGSC0003DMG400008811]	1.55406	4.4182	47.8568	146.26	12.1833	18.294	129.662	204.188	4020.47	453.253	3.149	0.0041043	0.058804	FALSE	6508.2	464.663	3.808	0.0012403	0.022255	UP	492.251	383.79	0.35908	0.7888	0.99162	FALSE	1575.12	68.9504	1.0685	4.5138	3.31e-22	2.16e-21	UP	4602.76	62.711	6.1976	1.05e-116	1.46e-114	UP	131.255	62.5865		0.00036827	0.00083798	UP
PGSC0003DMG400031025	Microtubule-associated protein [Source:PGSC_GENE%3BAcc:PGSC0003DMG400031025]	0.00614334	0.0110873	0.0456494	5.49134	0.10854	0.00239705	0.0285145	4.87654	3.91293	18.1301	-2.2121	0.18951	0.53869	FALSE	698.534	18.5865	5.232	1.09e-05	0.00069941	UP	0.282744	15.3516	-5.7627	0.015978	0.13922	FALSE	6.7415	1.22394	0.41043	2.4615	0.15634	0.23028	FALSE	775.416	1.11419	9.4428	1.02e-115	1.36e-113	UP	1.47802	1.11206		0.98735	1	FALSE
PGSC0003DMG400038230	(+)-neomenthol dehydrogenase [Source:PGSC_GENE%3BAcc:PGSC0003DMG400038230]	0.932727	5.67754	42.175	179.19	2.17475	21.3509	106.34	224.554	2254.63	55.5991	5.3417	7.82e-06	0.0008372	UP	4921.82	56.9986	6.4321	7.27e-07	9.7e-05	UP	396.073	47.0782	3.0726	0.017202	0.14594	FALSE	953.888	28.4395	2.1657	5.0679	1.22e-23	8.53e-23	UP	3872.36	25.8732	7.2256	2.28e-114	2.98e-112	UP	115.927	25.8379		2.31e-05	5.94e-05	UP
PGSC0003DMG400000540	Cell division control 20 [Source:PGSC_GENE%3BAcc:PGSC0003DMG400000540]	0.0448569	1.15396	0.119509	17.6546	0.449281	1.0238	0.120356	13.4271	12.1166	54.3904	-2.1664	0.11733	0.42881	FALSE	1392.05	55.7595	4.6419	1.75e-05	0.0010157	UP	89.7028	46.0548	0.9618	0.57869	0.88048	FALSE	12.7828	6.47506	4.2455	0.98124	0.31015	0.42104	FALSE	1806.6	5.88025	8.2632	1.02e-113	1.31e-111	UP	111.506	5.87846		1.03e-19	6.56e-19	UP
PGSC0003DMG400029675	Cell cycle switch 52B [Source:PGSC_GENE%3BAcc:PGSC0003DMG400029675]	0.0233837	0.00999606	0.0224393	8.76073	0.0754229	0.0117443	0.044971	5.62153	5.48741	10.8781	-0.98723	0.52016	0.84165	FALSE	695.137	11.1519	5.9619	1.89e-06	0.00019655	UP	1.2019	9.21096	-2.938	0.16073	0.50753	FALSE	2.85707	4.02143	-1.6614	-0.49317	0.98732	1	FALSE	1068.42	3.65272	8.1923	1.12e-110	1.38e-108	UP	1.15285	3.64682		0.5296	0.66532	FALSE
PGSC0003DMG400024634	70 kDa subunit of replication protein A [Source:PGSC_GENE%3BAcc:PGSC0003DMG400024634]	0.067444	0.247753	15.9182	6.49288	0.123527	0.383807	9.75513	6.19498	1192.04	18.1301	6.0389	1.52e-06	0.0002525	UP	777.741	18.5865	5.387	5.51e-06	0.00043415	UP	40.6267	15.3516	1.404	0.50674	0.83694	FALSE	2066.76	11.809	1.4326	7.4513	5.37e-103	3.92e-101	UP	805.718	10.7664	6.2257	2.18e-110	2.63e-108	UP	29.0436	10.7597		0.10664	0.16773	FALSE
PGSC0003DMG400003691	Phenylcoumaran benzylic ether reductase [Source:PGSC_GENE%3BAcc:PGSC0003DMG400003691]	1.54448	1.59452	80.5868	240.673	13.0784	5.11145	138.684	199.189	8552.18	969.358	3.1412	0.010924	0.11238	FALSE	12636.1	993.758	3.6685	0.0066989	0.072143	FALSE	275.779	820.799	-1.5735	0.052146	0.28104	FALSE	5282.75	136.516	-0.39309	5.2741	8.1e-33	8.34e-32	UP	15081.2	124.117	6.9249	3.85e-110	4.61e-108	UP	94.3692	123.926		0.64973	0.77892	FALSE
PGSC0003DMG400026934	Conserved gene of unknown function [Source:PGSC_GENE%3BAcc:PGSC0003DMG400026934]	0.0322749	0.238622	0.0990091	28.2419	0.00761126	0.0555143	0.130242	17.8558	17.3217	1.20868	3.8411	0.23189	0.59518	FALSE	2429.12	1.2391	10.937	1.51e-11	2.43e-08	UP	6.43342	1.02344	2.6522	0.56745	0.87683	FALSE	13.8949	6.11396	2.4458	1.1844	0.19327	0.27829	FALSE	3790.83	5.57184	9.4101	2.58e-109	3.03e-107	UP	30.2524	5.55278		0.00075019	0.0016506	UP
PGSC0003DMG400030993	Conserved gene of unknown function [Source:PGSC_GENE%3BAcc:PGSC0003DMG400030993]	0.00869442	0.00259433	0.00967572	6.16889	0.0483033	0.0125113	0.00993507	3.87331	1.24851	7.25205	-2.5382	0.23169	0.59518	FALSE	498.201	7.4346	6.0663	5.37e-06	0.00042763	UP	1.34376	6.14064	-2.1921	0.28265	0.65938	FALSE	1.28399	1.55778	-2.1902	-0.27886	1	1	FALSE	782.93	1.4242	9.1026	3.27e-109	3.83e-107	UP	0.310073	1.4151		0.67123	0.79983	FALSE
PGSC0003DMG400003044	Osmotin [Source:PGSC_GENE%3BAcc:PGSC0003DMG400003044]	0.103213	0.860472	1.96433	54.3311	1.40735	2.21504	3.4344	67.2236	168.203	83.3986	1.0121	0.45863	0.79694	FALSE	3411.3	85.4979	5.3183	5.61e-06	0.00043804	UP	94.1521	70.6174	0.41497	0.81832	1	FALSE	102.938	7.29293	2.619	3.8191	1.06e-15	5.05e-15	UP	2721.28	6.62275	8.6826	5e-109	5.83e-107	UP	40.6819	6.62234		0.00065067	0.0014419	UP
PGSC0003DMG401022702	Cyclin B1 [Source:PGSC_GENE%3BAcc:PGSC0003DMG401022702]	0.00964613	0.00697145	0.0438522	8.33578	0.0113618	0.0193516	0.0416607	4.19826	3.68806	1.20868	1.6094	0.9232	1	FALSE	383.107	1.2391	8.2723	9.49e-07	0.00011748	UP	1.4716	1.02344	0.52396	1	1	FALSE	4.11929	1.22394	-0.91074	1.7509	0.40182	0.52414	FALSE	749.618	1.11419	9.394	7.58e-109	8.78e-107	UP	0.59152	1.11206		0.92881	1	FALSE
PGSC0003DMG400026853	Endochitinase 3 [Source:PGSC_GENE%3BAcc:PGSC0003DMG400026853]	0.07295	0.724847	4.31095	11.457	0.141981	0.905333	3.23964	17.8239	183.409	9.6694	4.2455	0.006845	0.083042	FALSE	1039.95	9.9128	6.713	8.84e-08	2.12e-05	UP	44.606	8.18752	2.4457	0.2253	0.59417	FALSE	259.582	5.92455	2.8736	5.4533	5.26e-22	3.42e-21	UP	659.836	5.3852	6.937	3.24e-107	3.61e-105	UP	39.4299	5.38001		1.21e-05	3.21e-05	UP
PGSC0003DMG400019214	Bipolar kinesin KRP-130 [Source:PGSC_GENE%3BAcc:PGSC0003DMG400019214]	0.0518675	0.0465572	0.0737005	5.51566	0.150313	0.0682913	0.158581	3.79678	29.4316	33.8429	-0.20149	0.77334	0.98615	FALSE	731.989	34.6948	4.399	8.3e-05	0.0031442	UP	11.2366	28.6563	-1.3507	0.29835	0.67728	FALSE	14.6717	13.9301	-0.59598	0.074822	0.89635	0.98308	FALSE	1049.82	12.6912	6.3702	3.65e-107	4.05e-105	UP	8.36978	12.6509		0.53357	0.6687	FALSE
PGSC0003DMG400002523	Stem 28 kDa glycoprotein [Source:PGSC_GENE%3BAcc:PGSC0003DMG400002523]	0.0102906	0.0472764	4.16301	10.5931	0.179129	1.3974	30.4735	46.9826	1539.51	10.8781	7.1449	7.81e-08	3.33e-05	UP	2444.57	11.1519	7.7761	3.52e-09	1.79e-06	UP	61.5312	9.21096	2.7399	0.15226	0.49398	FALSE	223.557	0.745655	1.7568	8.2279	1.5e-48	2.65e-47	UP	544.504	0.680826	9.6434	2.1e-105	2.24e-103	UP	2.29373	0.678743		0.6223	0.75747	FALSE
PGSC0003DMG400003043	Osmotin [Source:PGSC_GENE%3BAcc:PGSC0003DMG400003043]	1.15436	2.3198	11.5966	117.084	2.99656	7.72392	14.1593	140.601	710.702	182.51	1.9613	0.05598	0.2888	FALSE	7342.5	187.104	5.2944	4.94e-05	0.0021259	UP	335.894	154.539	1.12	0.31999	0.70112	FALSE	624.527	83.8487	0.56665	2.8969	1.82e-09	6.08e-09	UP	6027.93	76.2572	6.3046	2.61e-102	2.59e-100	UP	112.816	76.1714		0.067649	0.11116	FALSE
Novel01004	PREDICTED: bifunctional monodehydroascorbate reductase and carbonic anhydrase nectarin-3-like [Solanum tuberosum]	0.04272	2.25932	1.34582	16.604	0.0311689	7.5002	1.36502	1.87069	44.2658	1.20868	5.1947	0.047547	0.26587	FALSE	61.9973	1.2391	5.6448	0.0098096	0.093724	FALSE	212.141	1.02344	7.6955	0.00017072	0.0068488	UP	46.1674	1.97534	5.2825	4.5467	7.63e-09	2.46e-08	UP	544.605	1.79416	8.2458	2.2e-101	2.16e-99	UP	69.9932	1.79832		1.69e-12	7.37e-12	UP
PGSC0003DMG400011978	Conserved gene of unknown function [Source:PGSC_GENE%3BAcc:PGSC0003DMG400011978]	0.0595196	0.0564449	0.114876	10.4927	0.233781	0.0880264	0.10556	7.37225	10.5215	27.7995	-1.4017	0.31437	0.68851	FALSE	750.836	28.4993	4.7195	3.34e-05	0.001602	UP	7.54565	23.5391	-1.6413	0.27066	0.6484	FALSE	12.0791	8.44037	-0.52033	0.51713	0.58732	0.71468	FALSE	1054.7	7.6734	7.1028	1.08e-99	1.01e-97	UP	5.35231	7.6767		0.67948	0.80816	FALSE
PGSC0003DMG400019139	Rop guanine nucleotide exchange factor [Source:PGSC_GENE%3BAcc:PGSC0003DMG400019139]	0.0387937	0.134355	5.69801	7.79486	0.791597	0.397006	14.7243	8.17246	1047.64	67.6858	3.9521	0.0003982	0.012149	UP	596.964	69.3896	3.1049	0.0031501	0.04269	UP	24.7071	57.3126	-1.2139	0.30813	0.68915	FALSE	431.007	3.95496	1.3543	6.7679	6.1e-63	1.63e-61	UP	563.657	3.59017	7.2946	1.17e-99	1.1e-97	UP	9.17649	3.58921		0.36987	0.49651	FALSE
PGSC0003DMG400025246	Histone H3.2 [Source:PGSC_GENE%3BAcc:PGSC0003DMG400025246]	0.184678	0.621968	39.5302	71.3297	0.809333	0.59896	54.5664	44.6613	1633.27	29.0082	5.8152	2.04e-06	0.00031832	UP	1368.12	29.7384	5.5237	1.3e-06	0.00014746	UP	15.6084	24.5626	-0.65413	0.54871	0.86596	FALSE	1252.92	7.89415	1.3127	7.3103	2.59e-103	1.9e-101	UP	2160.85	7.18022	8.2334	1.17e-98	1.08e-96	UP	17.8125	7.17081		0.24821	0.35347	FALSE
PGSC0003DMG400017457	Plant mitotic spindle assembly checkpoint protein mad2 [Source:PGSC_GENE%3BAcc:PGSC0003DMG400017457]	0.0202976	0.214507	0.134098	13.5783	0.0343747	0.0908983	0.072037	8.44328	4.28766	2.41735	0.82676	1	1	FALSE	508.132	2.4782	7.6798	3.39e-07	5.35e-05	UP	4.69212	2.04688	1.1968	0.93117	1	FALSE	8.3285	1.70223	2.9624	2.2906	0.20868	0.29759	FALSE	807.249	1.54756	9.0269	4.8e-98	4.32e-96	UP	12.0452	1.54538		0.017643	0.032461	UP
PGSC0003DMG400022190	Chromosome-associated kinesin KIF4A [Source:PGSC_GENE%3BAcc:PGSC0003DMG400022190]	0.0055566	0.00965136	0.0775179	8.20562	0.0631711	0.00687946	0.0239996	6.16346	5.36371	16.9215	-1.6575	0.30611	0.68109	FALSE	1413.99	17.3474	6.3489	1.26e-07	2.73e-05	UP	1.33071	14.3282	-3.4286	0.071621	0.33596	FALSE	18.352	1.77445	0.35961	3.3705	0.0014694	0.0029968	UP	1857.78	1.60924	10.173	1.51e-97	1.33e-95	UP	2.06642	1.61051		0.91886	1	FALSE
PGSC0003DMG400016915	Non-symbiotic hemoglobin 2 [Source:PGSC_GENE%3BAcc:PGSC0003DMG400016915]	0.184468	0.808696	8.51223	17.7708	0.084743	1.4089	3.3754	5.60153	119.886	3.62603	5.0471	0.00715	0.085199	FALSE	205.311	3.7173	5.7874	0.0002474	0.0069202	UP	43.9307	3.07032	3.8388	0.091254	0.38013	FALSE	322.158	9.41893	1.6914	5.0961	2.91e-40	3.94e-39	UP	643.688	8.60688	6.2247	3.43e-97	2.98e-95	UP	27.6333	8.55575		0.016439	0.030361	UP
PGSC0003DMG400013743	Conserved gene of unknown function [Source:PGSC_GENE%3BAcc:PGSC0003DMG400013743]	0.00921725	0.00649604	0.0257027	3.63487	0	0.0475356	0.030529	2.33789	4.41963	0	Inf	0.53452	0.85249	FALSE	348.216	0	Inf	3.92e-07	5.99e-05	UP	6.11249	0	Inf	0.37149	0.75181	FALSE	3.95297	1.91314	-0.94295	1.047	0.50848	0.6363	FALSE	535.038	1.73347	8.2698	1.17e-96	1e-94	UP	0.901593	1.73327		0.91515	0.99766	FALSE
PGSC0003DMG400012235	Endo-1%2C4-beta-glucanase [Source:PGSC_GENE%3BAcc:PGSC0003DMG400012235]	0.0608018	0.0204912	0.260134	6.4955	0.558688	0.188193	1.06155	2.17413	95.4607	60.4338	0.65955	0.72075	0.96094	FALSE	198.616	61.955	1.6807	0.14832	0.46906	FALSE	14.8797	51.172	-1.782	0.164	0.51302	FALSE	24.915	7.84197	-2.0041	1.6677	0.1436	0.21328	FALSE	594.5	7.12053	6.3835	1.84e-96	1.57e-94	UP	1.77144	7.10584		0.38722	0.51519	FALSE
PGSC0003DMG400024863	Cytochrome P450 hydroxylase [Source:PGSC_GENE%3BAcc:PGSC0003DMG400024863]	0.403519	0.259921	5.42441	41.3206	1.72896	1.57805	37.6009	76.5091	1373.7	76.1465	4.1731	0.00017753	0.0068803	UP	2884.34	78.0633	5.2075	5.5e-06	0.00043415	UP	50.3993	64.4767	-0.35538	0.65395	0.92593	FALSE	211.373	21.1987	-1.0764	3.3177	3.2e-14	1.42e-13	UP	1538.61	19.3101	6.3161	1.96e-95	1.63e-93	UP	9.14333	19.2805		0.14845	0.22503	FALSE
PGSC0003DMG401027032	Cell division control 20 [Source:PGSC_GENE%3BAcc:PGSC0003DMG401027032]	0.011677	0.109655	0.0816321	20.2852	0.247025	0.11211	0.138547	13.8623	11.3537	24.1735	-1.0903	0.43399	0.77876	FALSE	1161.59	24.782	5.5507	1.46e-06	0.00016033	UP	7.98995	20.4688	-1.3572	0.33341	0.71571	FALSE	7.05802	1.36264	2.7947	2.3729	0.14701	0.21784	FALSE	1677.83	1.23842	10.404	6.75e-94	5.38e-92	UP	8.56846	1.23481		0.055314	0.092522	FALSE
PGSC0003DMG400000304	ROP [Source:PGSC_GENE%3BAcc:PGSC0003DMG400000304]	0.01418	0.147815	0.0882427	17.3239	0.799549	0.22986	0.316418	10.358	12.6649	38.6776	-1.6107	0.243	0.60769	FALSE	429.084	39.6512	3.4358	0.0025319	0.036649	UP	7.98234	32.7501	-2.0366	0.16917	0.52069	FALSE	3.77557	0.817875	2.9412	2.2067	0.38725	0.50845	FALSE	708.35	0.742508	9.8978	9.08e-94	7.2e-92	UP	5.71325	0.74388		0.20754	0.30238	FALSE
PGSC0003DMG400001291	Conserved gene of unknown function [Source:PGSC_GENE%3BAcc:PGSC0003DMG400001291]	0.00604205	0.0227707	0.0109086	2.93571	0.0513008	0.00977683	0.00200985	2.59576	0.304431	9.6694	-4.9892	0.050118	0.27364	FALSE	419.482	9.9128	5.4032	3.84e-05	0.0017723	UP	1.33071	8.18752	-2.6212	0.19146	0.55181	FALSE	1.81823	1.35836	1.4659	0.42067	1	1	FALSE	467.993	1.23656	8.564	1.52e-91	1.15e-89	UP	3.43149	1.24225		0.59519	0.73054	FALSE
PGSC0003DMG400000381	Conserved gene of unknown function [Source:PGSC_GENE%3BAcc:PGSC0003DMG400000381]	0.0717487	0.564632	0.696503	9.08056	0.16855	1.42729	1.1822	8.97425	77.773	13.2954	2.5483	0.15191	0.49198	FALSE	606.667	13.6301	5.476	9.15e-06	0.00062405	UP	81.646	11.2578	2.8585	0.10653	0.41346	FALSE	48.5729	6.74817	2.5359	2.8476	2.71e-06	7.22e-06	UP	605.53	6.12684	6.6269	2.31e-91	1.75e-89	UP	35.5579	6.13141		0.00013673	0.00032537	UP
PGSC0003DMG400015211	Beta-galactosidase [Source:PGSC_GENE%3BAcc:PGSC0003DMG400015211]	0.0406159	0.602932	3.36945	3.61272	0.120989	0.53429	3.30939	2.1546	495.101	21.7562	4.5082	0.00045707	0.01335	UP	330.696	22.3038	3.8901	0.0015455	0.026022	UP	69.3256	18.4219	1.912	0.27866	0.65705	FALSE	535.923	8.71055	3.4543	5.9431	2.41e-88	1.25e-86	UP	549.269	7.92545	6.1149	1.51e-88	1.08e-86	UP	86.5889	7.89973		1.52e-11	6.25e-11	UP
PGSC0003DMG400006793	DNA topoisomerase 2 [Source:PGSC_GENE%3BAcc:PGSC0003DMG400006793]	0.0097382	0.0248194	0.0318079	9.08114	0.0753397	0.0412489	0.102727	6.72946	27.6783	24.1735	0.19533	1	1	FALSE	1849.73	24.782	6.2219	1.74e-07	3.5e-05	UP	9.64824	20.4688	-1.0851	0.41452	0.78704	FALSE	9.01796	3.72827	0.90394	1.2743	0.33142	0.44591	FALSE	2462.41	3.40413	9.4986	2.87e-88	2.03e-86	UP	6.35019	3.39371		0.60868	0.74412	FALSE
PGSC0003DMG400008997	Protein kinase [Source:PGSC_GENE%3BAcc:PGSC0003DMG400008997]	0.0307394	0.113333	0.700933	8.11084	0.536717	0.4306	1.32921	6.59917	187.612	90.6507	1.0494	0.4299	0.77443	FALSE	954.766	92.9325	3.3609	0.00094342	0.01849	UP	52.5584	76.758	-0.54639	0.58068	0.88228	FALSE	104.714	6.19192	1.4416	4.0799	1.27e-16	6.37e-16	UP	1158.2	5.63265	7.6839	8.87e-88	6.19e-86	UP	15.2797	5.62543		0.11313	0.17677	FALSE
PGSC0003DMG400018917	Polyphenol oxidase A%2C chloroplastic [Source:PGSC_GENE%3BAcc:PGSC0003DMG400018917]	0.0219021	0.137266	0.644764	4.43817	0.053595	1.59394	2.88874	4.7156	325.569	7.25205	5.4884	0.00026231	0.0090613	UP	547.344	7.4346	6.202	2.84e-06	0.00027041	UP	156.313	6.14064	4.6699	0.0062473	0.07709	FALSE	77.1753	3.53459	2.2003	4.4485	4.27e-13	1.78e-12	UP	508.503	3.21563	7.305	1.81e-87	1.25e-85	UP	14.837	3.22838		0.074947	0.12191	FALSE
PGSC0003DMG402010918	Xyloglucan endotransglycosylase [Source:PGSC_GENE%3BAcc:PGSC0003DMG402010918]	0.012017	0.0326327	0.644381	7.50329	0.416293	0.09801	2.13578	1.69963	118.438	27.7995	2.091	0.17443	0.52423	FALSE	96.3526	28.4993	1.7574	0.21277	0.56073	FALSE	4.69851	23.5391	-2.3248	0.14417	0.47893	FALSE	38.0576	0.956571	1.0079	5.3142	1.03e-08	3.29e-08	UP	423.887	0.866736	8.9339	2.16e-87	1.48e-85	UP	1.74281	0.866634		0.76404	0.88504	FALSE
PGSC0003DMG400025148	Conserved gene of unknown function [Source:PGSC_GENE%3BAcc:PGSC0003DMG400025148]	0.0394307	0.0763281	0.159853	7.41317	0.00897526	0.0811057	0.153598	4.96003	17.2303	1.20868	3.8334	0.23554	0.59866	FALSE	572.459	1.2391	8.8517	4.51e-08	1.31e-05	UP	7.82366	1.02344	2.9344	0.48212	0.81946	FALSE	19.0333	6.33208	0.50979	1.5878	0.065957	0.10543	FALSE	844.203	5.75415	7.1968	3.3e-87	2.26e-85	UP	8.20581	5.76315		0.68421	0.81239	FALSE
PGSC0003DMG400009418	Polygalacturonase QRT3 [Source:PGSC_GENE%3BAcc:PGSC0003DMG400009418]	0.219227	2.08048	32.6482	34.5824	0.485903	18.4803	39.8743	76.234	1402.2	20.5475	6.0926	1.14e-06	0.00020828	UP	2761.36	21.0647	7.0344	3.09e-08	1.01e-05	UP	569.899	17.3985	5.0337	0.0002279	0.0084477	UP	1220.46	11.0604	2.806	6.7859	5.91e-16	2.87e-15	UP	1236.13	10.091	6.9366	5.73e-87	3.89e-85	UP	70.2927	10.051		0.037472	0.064922	FALSE
PGSC0003DMG400026914	Calcium-binding protein [Source:PGSC_GENE%3BAcc:PGSC0003DMG400026914]	0.141891	3.48102	1.72756	21.1064	0.575931	9.57684	2.25049	12.1475	70.7338	21.7562	1.701	0.33534	0.70895	FALSE	392.715	22.3038	4.1381	0.00065104	0.014217	UP	262.864	18.4219	3.8348	0.0085439	0.093899	FALSE	57.7024	6.39281	4.1749	3.1741	8.96e-08	2.68e-07	UP	673.955	5.81757	6.8561	1.97e-86	1.32e-84	UP	104.997	5.81324		5.51e-18	3.22e-17	UP
PGSC0003DMG400021859	Conserved gene of unknown function [Source:PGSC_GENE%3BAcc:PGSC0003DMG400021859]	0.00355158	0.00403338	0.0172072	5.64187	0.0312903	0.0242709	0.0127198	3.11904	2.07299	6.04338	-1.5436	0.44177	0.78386	FALSE	515.817	6.1955	6.3795	2.53e-06	0.00024652	UP	3.39959	5.1172	-0.59	0.71304	0.95645	FALSE	2.93873	0.817875	-0.26246	1.8452	0.5318	0.66014	FALSE	921.007	0.742508	10.277	4.62e-86	3.07e-84	UP	0.620147	0.74388		1	1	FALSE
PGSC0003DMG400013358	Conserved gene of unknown function [Source:PGSC_GENE%3BAcc:PGSC0003DMG400013358]	0.020472	0.10084	0.941662	5.41681	0.0996853	0.258472	1.22644	4.14708	99.4881	9.6694	3.363	0.052916	0.28039	FALSE	344.833	9.9128	5.1205	0.00012559	0.0041977	UP	18.1531	8.18752	1.1487	0.71079	0.95566	FALSE	80.778	2.36991	1.8616	5.0911	9.08e-15	4.15e-14	UP	444.189	2.16757	7.6789	1.06e-85	7e-84	UP	7.81871	2.15146		0.19214	0.28286	FALSE
PGSC0003DMG400030514	Histone chaperone ASF1A [Source:PGSC_GENE%3BAcc:PGSC0003DMG400030514]	0.0721008	0.755229	16.5902	10.4143	0.022519	0.650188	12.3724	6.62695	552.561	1.20868	8.8366	3.41e-07	9.07e-05	UP	304.83	1.2391	7.9426	4.53e-06	0.00038154	UP	25.3527	1.02344	4.6306	0.10945	0.4193	FALSE	787.632	4.6169	2.9505	7.4145	2.13e-131	2.67e-129	UP	472.718	4.21105	6.8107	6.88e-85	4.46e-83	UP	32.3728	4.18777		6.11e-05	0.00015063	UP
PGSC0003DMG400027505	Conserved gene of unknown function [Source:PGSC_GENE%3BAcc:PGSC0003DMG400027505]	0.00261148	0.0071187	0.00172928	3.0517	0.00786668	0	0.0044975	1.98806	0.582165	1.20868	-1.0539	0.83947	1	FALSE	261.673	1.2391	7.7223	1.17e-05	0.00073919	UP	0	1.02344	#NAME?	0.47952	0.81741	FALSE	0.234461	0.478286	1.0105	-1.0285	1	1	FALSE	396.57	0.433368	9.8378	1.13e-84	7.23e-83	UP	0.872966	0.433317		0.92641	1	FALSE
PGSC0003DMG400014829	Ubiquitin-protein ligase [Source:PGSC_GENE%3BAcc:PGSC0003DMG400014829]	0.0021052	0.0520739	0.358592	3.4323	0.294929	0.083691	0.308097	2.19357	34.7495	39.8863	-0.1989	0.77718	0.98832	FALSE	254.089	40.8903	2.6355	0.026757	0.17674	FALSE	8.0924	33.7735	-2.0613	0.159	0.50553	FALSE	42.8702	0.33959	4.1799	6.98	1.81e-08	5.67e-08	UP	392.552	0.30914	10.31	5.96e-84	3.77e-82	UP	5.62893	0.310563		0.3693	0.49586	FALSE
PGSC0003DMG400006856	Conserved gene of unknown function [Source:PGSC_GENE%3BAcc:PGSC0003DMG400006856]	0.770084	5.21938	34.7326	139.154	3.75786	11.0772	87.1049	55.0052	6774.57	350.516	4.2726	0.00064165	0.016437	UP	4367.29	359.339	3.6033	0.00094629	0.018516	UP	749.821	296.798	1.3371	0.22291	0.59088	FALSE	2865.59	85.6667	2.321	5.064	7.11e-194	3.47e-191	UP	10973.7	77.9325	7.1376	1.47e-83	9.2e-82	UP	388.809	77.8094		2.81e-23	2.11e-22	UP
PGSC0003DMG401025807	Conserved gene of unknown function [Source:PGSC_GENE%3BAcc:PGSC0003DMG401025807]	0.0502193	4.80749	4.73227	29.1982	0.0841095	8.56604	2.858	2.5234	103.868	3.62603	4.8402	0.011613	0.11662	FALSE	92.6119	3.7173	4.6389	0.0085655	0.085531	FALSE	268.908	3.07032	6.4526	0.0002161	0.0081432	UP	180.553	2.5823	6.1363	6.1276	1.17e-11	4.5e-11	UP	1063.89	2.35075	8.822	9.05e-83	5.6e-81	UP	165.611	2.35431		4.32e-08	1.4e-07	UP
PGSC0003DMG400015789	ATP binding / microtubule motor [Source:PGSC_GENE%3BAcc:PGSC0003DMG400015789]	0.0602544	0.286089	0.210366	10.5554	0.398089	0.189052	0.240786	6.31812	23.7332	47.1383	-0.99	0.4145	0.76245	FALSE	640.802	48.3249	3.729	0.00060978	0.01354	UP	16.1673	39.9142	-1.3038	0.29986	0.67952	FALSE	22.0157	8.50832	1.8045	1.3716	0.077095	0.12154	FALSE	1056.42	7.73322	7.0939	2.32e-82	1.41e-80	UP	27.0686	7.74928		0.13447	0.2061	FALSE
PGSC0003DMG400000348	Meiotic coiled-coil protein [Source:PGSC_GENE%3BAcc:PGSC0003DMG400000348]	0.0858048	0.147702	3.85011	10.8698	0.815709	1.86395	6.25979	5.18434	262.296	41.095	2.6742	0.038602	0.23501	FALSE	223.472	42.1294	2.4072	0.045722	0.24591	FALSE	68.1223	34.797	0.96917	0.60831	0.90048	FALSE	171.545	5.15738	0.34185	5.0558	1.54e-30	1.44e-29	UP	462.946	4.7051	6.6205	7.06e-82	4.25e-80	UP	5.93915	4.68614		0.85413	0.95588	FALSE
Novel01952	PREDICTED: structural maintenance of chromosomes protein 2-1-like [Solanum tuberosum]	0.206628	0.458623	5.94456	17.1041	0.187778	0.947224	7.27773	12.432	662.03	20.5475	5.0099	7.37e-05	0.0038102	UP	1164.26	21.0647	5.7884	7.57e-07	9.94e-05	UP	75.094	17.3985	2.1097	0.23101	0.60015	FALSE	575.305	26.9703	0.70756	4.4149	4.51e-69	1.45e-67	UP	1582	24.5682	6.0088	2.35e-81	1.39e-79	UP	40.0832	24.5452		0.19032	0.28047	FALSE
PGSC0003DMG400003640	Conserved gene of unknown function [Source:PGSC_GENE%3BAcc:PGSC0003DMG400003640]	0.0355712	0.034559	0.0409635	22.0123	0.168499	0.0504647	0.147708	15.063	10.6299	14.5041	-0.44833	0.70836	0.95341	FALSE	1112.02	14.8692	6.2247	2.58e-07	4.52e-05	UP	3.17472	12.2813	-1.9518	0.26108	0.63935	FALSE	3.1133	3.65458	-0.47957	-0.23126	1	1	FALSE	1601.31	3.34518	8.903	3.93e-81	2.32e-79	UP	2.37649	3.31362		0.87384	0.97264	FALSE
PGSC0003DMG400011655	Chalcone isomerase [Source:PGSC_GENE%3BAcc:PGSC0003DMG400011655]	1.71541	10.5239	319.594	423.563	3.62564	10.4427	419.991	664.016	16923	175.258	6.5934	0.00011961	0.0052729	UP	27519.9	179.67	7.259	0.00032607	0.0085434	UP	367.274	148.399	1.3074	0.29206	0.66944	FALSE	13660.9	98.8912	2.1779	7.11	1.1e-61	2.84e-60	UP	17340.9	89.9469	7.5909	1e-80	5.8e-79	UP	406.271	89.7819		4.13e-19	2.56e-18	UP
PGSC0003DMG402023841	Sterol desaturase [Source:PGSC_GENE%3BAcc:PGSC0003DMG402023841]	0.123556	2.1322	16.7692	48.9295	0.0638281	0.105126	0.325602	2.27683	35.7018	8.46073	2.0771	0.35607	0.72823	FALSE	256.226	8.6737	4.8846	0.00045309	0.01086	UP	10.0036	7.16408	0.48166	1	1	FALSE	1967.15	19.5323	3.6691	6.6541	8.41e-17	4.28e-16	UP	5480.82	17.7647	8.2692	1.59e-80	9.14e-79	UP	225.704	17.7429		5.85e-13	2.62e-12	UP
PGSC0003DMG400016283	Knolle [Source:PGSC_GENE%3BAcc:PGSC0003DMG400016283]	0.00869699	0.00947926	0.122409	21.5755	0.0617958	0.0410798	0.0820466	15.853	5.31958	4.8347	0.13788	1	1	FALSE	1062.89	4.9564	7.7445	8.58e-09	3.77e-06	UP	2.35258	4.09376	-0.79918	0.63582	0.91842	FALSE	8.46698	0.81213	-0.31598	3.3821	0.047204	0.077575	FALSE	1426.46	0.743373	10.906	2.29e-79	1.27e-77	UP	0.59152	0.736359		1	1	FALSE
PGSC0003DMG400001426	Expansin [Source:PGSC_GENE%3BAcc:PGSC0003DMG400001426]	0.615992	2.65171	28.0902	61.7895	1.74051	19.3872	43.5188	27.2734	2620.29	125.702	4.3816	0.00011386	0.0050737	UP	1680.35	128.866	3.7048	0.00027731	0.0075769	UP	1014.31	106.438	3.2524	0.00425	0.06097	FALSE	1794.58	53.0598	1.6667	5.0799	7.31e-142	1.08e-139	UP	3772.39	48.2859	6.2877	1.07e-78	5.86e-77	UP	152.966	48.1795		0.00029497	0.00067827	UP
PGSC0003DMG400005697	Conserved gene of unknown function [Source:PGSC_GENE%3BAcc:PGSC0003DMG400005697]	0.00552616	0.00597958	0.0219799	5.59522	0.0390543	0.00707899	0.037598	3.84541	5.87042	7.25205	-0.30493	0.79199	0.99296	FALSE	611.879	7.4346	6.3628	1.29e-06	0.00014746	UP	0.963992	6.14064	-2.6713	0.22563	0.59444	FALSE	3.604	1.22394	-0.32704	1.5581	0.48173	0.60843	FALSE	878.075	1.11419	9.6222	1.24e-78	6.76e-77	UP	0.8865	1.11206		1	1	FALSE
PGSC0003DMG400005948	Cyclin B1 [Source:PGSC_GENE%3BAcc:PGSC0003DMG400005948]	0.0223313	0.0516112	0.137967	5.13739	0.0807237	0.00508756	0.0406842	3.05052	2.99092	7.25205	-1.2778	0.48255	0.81625	FALSE	234.8	7.4346	4.981	0.00050907	0.01183	UP	0.340624	6.14064	-4.1721	0.10521	0.41115	FALSE	10.9667	2.39143	0.76908	2.1972	0.061811	0.09941	FALSE	390.625	2.16684	7.494	3.94e-78	2.13e-76	UP	3.69225	2.16658		0.72474	0.85055	FALSE
PGSC0003DMG400006294	Clasp [Source:PGSC_GENE%3BAcc:PGSC0003DMG400006294]	0.0208934	0	0.0874757	21.0669	0.0707672	0.0445555	0.0419217	13.0831	2.36871	4.8347	-1.0293	0.59292	0.89468	FALSE	765.579	4.9564	7.2711	8.13e-08	2.03e-05	UP	2.17894	4.09376	-0.9098	0.63475	0.9184	FALSE	5.28051	1.70223	#NAME?	1.6333	0.33888	0.45437	FALSE	1216.28	1.54756	9.6183	4.19e-77	2.21e-75	UP	0	1.54538		0.47906	0.61389	FALSE
PGSC0003DMG400018480	Carotenoid cleavage dioxygenase 4 [Source:PGSC_GENE%3BAcc:PGSC0003DMG400018480]	0.0384229	0.0479804	1.8066	5.90449	0	0	0.0046281	0.0254566	0.304431	0	Inf	1	1	FALSE	1.78236	0	Inf	0.86982	1	FALSE	0	0	NA	NA	NA	NA	130.797	3.74979	-0.1194	5.1244	1.02e-20	6.23e-20	UP	408.922	3.4034	6.9087	5.79e-77	3.05e-75	UP	3.13807	3.40884		1	1	FALSE
PGSC0003DMG400015525	Histone H4 [Source:PGSC_GENE%3BAcc:PGSC0003DMG400015525]	0.616514	1.34102	32.6842	82.3961	2.36884	2.17479	70.6966	53.3986	1921.96	77.3552	4.6349	4.86e-05	0.0028071	UP	1491.72	79.3024	4.2335	5.8e-05	0.0024077	UP	51.735	65.5002	-0.34036	0.65676	0.92717	FALSE	943.991	24.0107	0.67723	5.297	1.68e-115	1.55e-113	UP	2274.05	21.8415	6.702	1.61e-75	8.13e-74	UP	34.9561	21.8603		0.50692	0.64234	FALSE
PGSC0003DMG400008346	Pentatricopeptide repeat-containing protein [Source:PGSC_GENE%3BAcc:PGSC0003DMG400008346]	0.00363407	0.105453	0.67358	5.12569	0.154278	0.707924	2.97993	5.06256	194.173	12.0868	4.0058	0.0086253	0.095899	FALSE	339.291	12.391	4.7752	0.00025219	0.0070335	UP	40.8032	10.2344	1.9953	0.35056	0.73143	FALSE	46.6699	0.33959	4.4088	7.1026	8.01e-11	2.92e-10	UP	339.485	0.30914	10.101	6.53e-75	3.26e-73	UP	6.59678	0.310563		0.053904	0.090358	FALSE
PGSC0003DMG400012444	ATP binding protein [Source:PGSC_GENE%3BAcc:PGSC0003DMG400012444]	0.0385277	0.0588341	0.100673	7.82182	0.109716	0.073839	0.368632	5.57565	30.5014	10.8781	1.4875	0.53374	0.852	FALSE	473.819	11.1519	5.409	2.47e-05	0.0013135	UP	5.34158	9.21096	-0.78609	0.57152	0.87849	FALSE	8.81636	4.55617	0.17323	0.95236	0.37253	0.49171	FALSE	655.488	4.14764	7.3041	3.57e-73	1.71e-71	UP	4.66555	4.13767		0.92595	1	FALSE
PGSC0003DMG400019158	Short-chain dehydrogenase [Source:PGSC_GENE%3BAcc:PGSC0003DMG400019158]	0.100251	0.0617786	4.01815	8.66516	0	0.110834	0.735469	2.17683	42.9988	0	Inf	0.021868	0.1721	FALSE	130.122	0	Inf	0.00015736	0.0049241	UP	5.5477	0	Inf	0.39616	0.77529	FALSE	247.342	8.32026	-1.1343	4.8937	2.74e-42	3.96e-41	UP	510.229	7.5539	6.0778	4.17e-72	1.95e-70	UP	3.43461	7.53915		0.65638	0.78548	FALSE
PGSC0003DMG400019123	Pectinesterase inhibitor [Source:PGSC_GENE%3BAcc:PGSC0003DMG400019123]	0.125134	0.273262	4.80629	19.9822	0.597255	2.17678	14.0628	11.8952	638.225	32.6342	4.2896	0.00040059	0.012209	UP	555.303	33.4557	4.053	0.00034517	0.0089545	UP	86.6951	27.6329	1.6496	0.3244	0.70502	FALSE	232.288	8.15577	0.68808	4.832	3.93e-38	4.97e-37	UP	922.811	7.42854	6.9568	8.62e-72	3.96e-70	UP	11.9365	7.40872		0.45066	0.58466	FALSE
PGSC0003DMG400014867	Peroxidase [Source:PGSC_GENE%3BAcc:PGSC0003DMG400014867]	1.15163	24.354	73.4925	191.384	1.92025	39.9986	96.1282	143.426	6681.06	160.754	5.3772	4.8e-05	0.0027732	UP	10282.3	164.8	5.9633	3.76e-05	0.0017498	UP	2417.02	136.118	4.1503	0.0004363	0.013186	UP	5443.72	114.974	3.963	5.5652	2.34e-29	2.08e-28	UP	13539.4	104.553	7.0168	4.31e-71	1.93e-69	UP	1627.99	104.392		9.49e-122	1.4e-119	UP
PGSC0003DMG400022234	Conserved gene of unknown function [Source:PGSC_GENE%3BAcc:PGSC0003DMG400022234]	0.0220564	0.0871459	0.214166	7.79792	0.0234091	0.0713804	0.111498	4.54009	4.86982	1.20868	2.0104	0.78309	0.99103	FALSE	200.959	1.2391	7.3415	5.68e-05	0.0023829	UP	2.66142	1.02344	1.3788	1	1	FALSE	9.78869	1.35836	1.5309	2.8493	0.079722	0.12538	FALSE	340.505	1.23656	8.1052	5.58e-71	2.49e-69	UP	3.58972	1.24225		0.5864	0.72139	FALSE
PGSC0003DMG400028099	B-type cyclin [Source:PGSC_GENE%3BAcc:PGSC0003DMG400028099]	0.0273817	0.0401266	0.0690053	12.8089	0.0324265	0.0360258	0.0852118	9.17926	5.29288	2.41735	1.1306	0.92331	1	FALSE	586.291	2.4782	7.8862	1.18e-07	2.69e-05	UP	1.98586	2.04688	-0.043659	0.92602	1	FALSE	4.54184	2.43639	0.11358	0.89853	0.63204	0.75533	FALSE	807.131	2.23012	8.4995	6.65e-71	2.95e-69	UP	2.39003	2.20908		1	1	FALSE
PGSC0003DMG400022836	Histone H3.2 [Source:PGSC_GENE%3BAcc:PGSC0003DMG400022836]	0.412051	0.628069	19.9111	89.9597	0.808153	1.18993	38.6851	52.0429	1256.67	31.4256	5.3215	9.01e-06	0.0009178	UP	1731.05	32.2166	5.7477	6.52e-07	8.87e-05	UP	33.5768	26.6094	0.33553	1	1	FALSE	684.873	19.1105	0.16744	5.1634	1.66e-92	9.58e-91	UP	2956.17	17.3929	7.4091	8.27e-71	3.65e-69	UP	19.5044	17.3672		0.77803	0.89641	FALSE
PGSC0003DMG401006333	Histone H3.2 [Source:PGSC_GENE%3BAcc:PGSC0003DMG401006333]	0.241682	0.681909	10.1759	23.5079	0.636304	0.527676	14.2267	18.2475	451.49	24.1735	4.2232	0.001023	0.022845	UP	592.991	24.782	4.5806	8.46e-05	0.0031747	UP	14.6053	20.4688	-0.48693	0.62665	0.91243	FALSE	341.894	10.9505	1.0542	4.9645	4.43e-53	8.86e-52	UP	754.839	9.96247	6.2435	2.43e-70	1.06e-68	UP	20.6948	9.96588		0.16351	0.24528	FALSE
PGSC0003DMG400009361	Chromosome-associated kinesin KIF4A [Source:PGSC_GENE%3BAcc:PGSC0003DMG400009361]	0.0336803	0.140846	0.58243	4.71196	0.0881235	0.322798	1.13116	3.56119	246.176	22.9648	3.4222	0.013402	0.12675	FALSE	793.845	23.5429	5.0755	1.14e-05	0.00072483	UP	61.0124	19.4454	1.6497	0.36914	0.74951	FALSE	134.226	10.4692	1.6241	3.6804	8.62e-19	4.83e-18	UP	1037.78	9.53457	6.7661	2.65e-70	1.15e-68	UP	29.2925	9.50264		0.012107	0.022779	UP
PGSC0003DMG400028816	Conserved gene of unknown function [Source:PGSC_GENE%3BAcc:PGSC0003DMG400028816]	0.0592572	0.405606	2.60727	7.87551	0.0499201	0.845935	3.74748	5.65553	378.153	6.04338	5.9675	7.56e-05	0.003869	UP	586.816	6.1955	6.5655	1.01e-06	0.00012248	UP	74.2561	5.1172	3.8591	0.045695	0.26308	FALSE	279.128	8.55756	2.3328	5.0276	1.28e-45	2.06e-44	UP	805.809	7.79836	6.6911	4.86e-70	2.1e-68	UP	39.215	7.78433		0.00025047	0.00057995	UP
PGSC0003DMG400027736	Histone H4 [Source:PGSC_GENE%3BAcc:PGSC0003DMG400027736]	1.80183	5.95282	94.7612	201.882	6.80852	12.0001	131.739	118.92	1855.45	114.824	4.0143	0.00026334	0.0090641	UP	1717.12	117.715	3.8666	0.00017705	0.0053893	UP	146.975	97.2268	0.59615	0.73118	0.9672	FALSE	1413.63	36.2442	1.2843	5.2855	1.72e-147	3.04e-145	UP	2877.37	32.9943	6.4464	8.99e-70	3.84e-68	UP	80.1861	32.921		0.0072733	0.014164	UP
PGSC0003DMG400012231	Electron transporter [Source:PGSC_GENE%3BAcc:PGSC0003DMG400012231]	0.00672702	0.0172776	0.852589	4.41481	0.114233	0.111384	1.55999	3.42784	110.096	9.6694	3.5092	0.039271	0.23699	FALSE	248.306	9.9128	4.6467	0.00072816	0.015413	UP	6.97947	8.18752	-0.23031	0.77976	0.98659	FALSE	63.8291	0.679179	0.91102	6.5543	1.05e-14	4.77e-14	UP	315.859	0.618279	8.9968	3.11e-69	1.3e-67	UP	1.16795	0.621126		0.96761	1	FALSE
PGSC0003DMG400009951	Expansin11 [Source:PGSC_GENE%3BAcc:PGSC0003DMG400009951]	0.401148	3.0582	19.8677	79.3848	2.62771	59.5539	35.1206	37.296	2097.69	188.553	3.4758	0.0011565	0.024735	UP	2287.2	193.3	3.5647	0.00050027	0.011691	UP	3095.73	159.657	4.2772	0.00039795	0.012361	UP	1260.94	34.3339	2.4917	5.1987	2.79e-137	3.82e-135	UP	4813.59	31.2655	7.2664	3.95e-69	1.65e-67	UP	175.288	31.1654		2.65e-09	9.43e-09	UP
PGSC0003DMG400002607	Conserved gene of unknown function [Source:PGSC_GENE%3BAcc:PGSC0003DMG400002607]	0.010847	0.0258651	0.0144762	1.77735	0.0107111	0.0308867	0.014833	1.60495	2.73525	2.41735	0.17825	1	1	FALSE	310.331	2.4782	6.9684	1.06e-05	0.00068919	UP	5.04009	2.04688	1.3	0.89399	1	FALSE	2.88953	2.92042	0.81658	-0.015343	1	1	FALSE	339.12	2.66262	6.9928	1.28e-67	5.08e-66	UP	4.66711	2.64992		0.62183	0.75697	FALSE
PGSC0003DMG402024469	E2F [Source:PGSC_GENE%3BAcc:PGSC0003DMG402024469]	0.0101104	1.28369	3.98153	5.51717	0	2.1084	3.63856	4.00015	289.413	0	Inf	6.83e-06	0.0007699	UP	326.957	0	Inf	6.07e-07	8.37e-05	UP	146.024	0	Inf	0.00027556	0.009725	UP	336.194	1.15172	6.5463	8.1894	3.86e-39	5.04e-38	UP	445.141	1.05251	8.7243	2.6e-67	1.02e-65	UP	97.8473	1.04692		1.79e-23	1.35e-22	UP
PGSC0003DMG401023841	Sterol desaturase [Source:PGSC_GENE%3BAcc:PGSC0003DMG401023841]	0.0081202	0.236796	3.45369	7.80903	0	0	0.020977	0.110215	0.873247	0	Inf	1	1	FALSE	4.64435	0	Inf	0.47077	0.80544	FALSE	0	0	NA	NA	NA	NA	151.022	0.478286	4.4289	8.3027	2.26e-10	7.98e-10	UP	326.55	0.433368	9.5575	3.3e-67	1.29e-65	UP	9.3333	0.433317		0.011365	0.021466	UP
PGSC0003DMG400035299	Alpha-6-galactosyltransferase [Source:PGSC_GENE%3BAcc:PGSC0003DMG400035299]	0.27181	6.51314	22.2539	22.9535	0.963007	19.7023	49.169	21.3549	3898.79	91.8593	5.4075	1.27e-05	0.0011564	UP	1737.6	94.1716	4.2057	6.24e-05	0.0025702	UP	1359.02	77.7814	4.127	0.00051164	0.014881	UP	1878.05	30.9176	4.1414	5.9247	2.77e-54	5.71e-53	UP	1850.84	28.0945	6.0417	4.26e-67	1.66e-65	UP	496.139	28.1146		4.36e-63	1.39e-61	UP
PGSC0003DMG400013573	Kinesin NACK2 [Source:PGSC_GENE%3BAcc:PGSC0003DMG400013573]	0.00794757	0.0398826	0.0400855	1.78116	0.0450304	0.0698457	0.0457506	1.05141	8.17852	9.6694	-0.24159	0.79221	0.99301	FALSE	193.36	9.9128	4.2859	0.002508	0.036448	UP	10.8136	8.18752	0.40135	1	1	FALSE	7.60837	2.03607	1.8857	1.9018	0.19507	0.28051	FALSE	323.478	1.85757	7.4441	6.53e-67	2.53e-65	UP	6.83033	1.84842		0.22458	0.32364	FALSE
PGSC0003DMG400025461	Serine/threonine-protein kinase [Source:PGSC_GENE%3BAcc:PGSC0003DMG400025461]	0.0244105	0.0995405	0.096983	12.1994	0.232307	0.253324	0.19724	6.1018	11.094	15.7128	-0.50216	0.67617	0.9413	FALSE	353.032	16.1083	4.4539	0.00042685	0.01042	UP	12.3879	13.3047	-0.103	0.8154	1	FALSE	5.7958	1.96959	1.5856	1.5571	0.35883	0.47695	FALSE	697.501	1.79502	8.6021	1.58e-66	6.05e-65	UP	5.37469	1.7908		0.37947	0.50662	FALSE
PGSC0003DMG400012630	Cell division cycle protein cdt2 [Source:PGSC_GENE%3BAcc:PGSC0003DMG400012630]	0.0272529	0.206486	6.33428	3.23771	0.153742	0.849587	3.9274	2.67436	411.038	19.3388	4.4097	0.000867	0.020341	UP	288.096	19.8256	3.8611	0.0022791	0.033974	UP	77.5718	16.375	2.244	0.19894	0.56045	FALSE	704.805	4.08791	2.485	7.4297	2.57e-122	2.68e-120	UP	344.838	3.71527	6.5363	1.61e-66	6.16e-65	UP	20.7386	3.70444		0.0033402	0.0067907	UP
PGSC0003DMG400007801	Anthocyanin acyltransferase [Source:PGSC_GENE%3BAcc:PGSC0003DMG400007801]	0.0541547	0.344978	3.78386	13.6382	0.216875	3.23023	25.9785	19.4433	2051.35	20.5475	6.6415	2.47e-07	7.72e-05	UP	1577.2	21.0647	6.2264	1.67e-07	3.42e-05	UP	222.816	17.3985	3.6788	0.013029	0.12416	FALSE	317.097	6.1197	2.2313	5.6953	3.19e-56	7.01e-55	UP	1091.94	5.57097	7.6147	2.35e-65	8.73e-64	UP	26.1085	5.5603		0.0031893	0.0065065	UP
PGSC0003DMG400001888	Conserved gene of unknown function [Source:PGSC_GENE%3BAcc:PGSC0003DMG400001888]	0.0185135	0.0141217	0.486807	7.28423	0.105629	0.374241	1.22754	6.24783	82.2239	8.46073	3.2807	0.073176	0.33317	FALSE	428.525	8.6737	5.6266	2.24e-05	0.0012201	UP	22.0777	7.16408	1.6237	0.53704	0.85885	FALSE	34.455	1.7687	-0.83022	4.284	0.00073111	0.0015449	UP	493.11	1.61011	8.2586	5.3e-64	1.89e-62	UP	0.901593	1.60299		0.91423	0.997	FALSE
PGSC0003DMG400031240	Ubiquitin carrier protein [Source:PGSC_GENE%3BAcc:PGSC0003DMG400031240]	0.216518	1.7801	1.03832	37.2322	0.145291	1.9997	1.24341	22.4844	51.7487	7.25205	2.8351	0.16689	0.51437	FALSE	962.015	7.4346	7.0157	5.64e-08	1.6e-05	UP	72.6	6.14064	3.5635	0.062431	0.31177	FALSE	45.8459	12.8941	2.6004	1.8301	0.0010112	0.0021033	UP	1570.46	11.7664	7.0604	5.92e-64	2.11e-62	UP	70.9353	11.6967		0.00010791	0.00025956	UP
PGSC0003DMG400018481	Carotenoid cleavage dioxygenase 4 [Source:PGSC_GENE%3BAcc:PGSC0003DMG400018481]	0.0370259	0.0200529	1.31484	5.63254	0	0	0.0217013	0.0847064	2.2855	0	Inf	0.83275	1	FALSE	8.88211	0	Inf	0.23037	0.58425	FALSE	0	0	NA	NA	NA	NA	143.936	5.46203	-1.3205	4.7198	4.76e-13	1.98e-12	UP	589.296	4.95196	6.8949	1.08e-63	3.83e-62	UP	1.98366	4.95429		0.65256	0.78179	FALSE
Novel01100	PREDICTED: uncharacterized protein LOC102589791 [Solanum tuberosum]	0.0114243	0.0297589	0.11396	13.1215	0.0484999	0.0160664	0.0415922	4.41769	0.873247	1.20868	-0.46896	0.94653	1	FALSE	94.329	1.2391	6.2503	0.00223	0.033465	UP	0.282744	1.02344	-1.8559	0.7727	0.98313	FALSE	2.51335	0.33959	0.92954	2.8877	0.50434	0.63188	FALSE	276.57	0.30914	9.8052	2.34e-63	8.23e-62	UP	0.59152	0.310563		1	1	FALSE
PGSC0003DMG400015538	GTP cyclohydrolase II [Source:PGSC_GENE%3BAcc:PGSC0003DMG400015538]	0.0429703	0.191888	2.59159	4.32983	0.0957929	0.335575	1.40574	3.89163	189.784	15.7128	3.5944	0.015599	0.1405	FALSE	546.869	16.1083	5.0853	3.28e-05	0.0015821	UP	39.6477	13.3047	1.5753	0.44739	0.81135	FALSE	375.976	8.41018	1.722	5.4824	2.4e-26	1.89e-25	UP	601.29	7.68046	6.2907	3.76e-63	1.31e-61	UP	25.1524	7.62414		0.18794	0.27738	FALSE
PGSC0003DMG400014295	KDEL motif-containing protein 1 [Source:PGSC_GENE%3BAcc:PGSC0003DMG400014295]	0.00344266	0.102836	0.527728	2.76498	0	0.974172	2.12048	2.64461	206.898	0	Inf	4.9e-05	0.0028237	UP	263.866	0	Inf	2.64e-06	0.00025444	UP	82.6757	0	Inf	0.002439	0.042484	UP	54.4106	0.478286	4.4663	6.8299	2.64e-13	1.11e-12	UP	272.547	0.433368	9.2967	1.08e-62	3.75e-61	UP	9.57818	0.433317		0.0090599	0.017397	UP
PGSC0003DMG400009983	Cyclin B [Source:PGSC_GENE%3BAcc:PGSC0003DMG400009983]	0.0131236	0.0856237	0.126903	13.4374	0.0932485	0.0307912	0.102186	10.4298	8.85359	9.6694	-0.12716	0.83385	1	FALSE	926.863	9.9128	6.5469	1.84e-07	3.55e-05	UP	2.30775	8.18752	-1.8269	0.31769	0.69929	FALSE	11.6295	1.62426	2.2659	2.8399	0.029489	0.050229	FALSE	1177.59	1.48675	9.6295	2.12e-62	7.26e-61	UP	7.08314	1.47272		0.15486	0.23371	FALSE
PGSC0003DMG400000984	3-oxo-5-alpha-steroid 4-dehydrogenase family protein [Source:PGSC_GENE%3BAcc:PGSC0003DMG400000984]	0.0488157	0.467811	4.18797	6.14229	0.117753	0.0225003	2.19179	2.79728	111.766	7.25205	3.946	0.024148	0.18262	FALSE	147.451	7.4346	4.3098	0.00457	0.056069	FALSE	0.990085	6.14064	-2.6328	0.22547	0.59444	FALSE	228.162	3.58811	2.8217	5.9907	5.57e-44	8.49e-43	UP	320.175	3.28263	6.6079	2.68e-62	9.13e-61	UP	23.0199	3.256		0.013856	0.025884	UP
PGSC0003DMG400001118	Zinc finger protein [Source:PGSC_GENE%3BAcc:PGSC0003DMG400001118]	0.00222415	0.125974	0.115491	2.4728	0.00944222	0.0878676	0.117026	1.84932	12.4621	1.20868	3.366	0.35057	0.72497	FALSE	202.739	1.2391	7.3542	5.38e-05	0.0022677	UP	8.20273	1.02344	3.0027	0.47651	0.81741	FALSE	13.0821	0.33959	5.3717	5.2677	0.0025521	0.0050465	UP	267.699	0.30914	9.7581	9.19e-62	3.08e-60	UP	12.8585	0.310563		0.0096805	0.01851	UP
PGSC0003DMG400019110	Chalcone synthase 2 [Source:PGSC_GENE%3BAcc:PGSC0003DMG400019110]	4.9045	46.5679	824.043	968.592	7.15957	31.8087	801.91	1263.3	62550	669.606	6.5456	0.018113	0.15424	FALSE	101271	686.462	7.2048	0.054532	0.2728	FALSE	2146.15	566.986	1.9204	0.064443	0.31594	FALSE	68158.6	547.012	2.8079	6.9612	0	0	UP	76739.2	497.293	7.2697	1.88e-61	6.25e-60	UP	3478.83	496.779		3.62e-05	9.13e-05	UP
PGSC0003DMG400007503	LOB domain-containing protein [Source:PGSC_GENE%3BAcc:PGSC0003DMG400007503]	0.0940545	1.17454	8.99493	11.5264	0.211503	1.34387	7.30189	9.65666	344.013	12.0868	4.831	0.00064158	0.016437	UP	471.113	12.391	5.2487	3.46e-05	0.0016453	UP	55.8558	10.2344	2.4483	0.20227	0.56045	FALSE	454.526	6.40858	3.2033	6.1482	2.19e-38	2.79e-37	UP	556.693	5.8177	6.5803	3.37e-61	1.11e-59	UP	53.6138	5.82085		4.28e-08	1.39e-07	UP
PGSC0003DMG400022276	Conserved gene of unknown function [Source:PGSC_GENE%3BAcc:PGSC0003DMG400022276]	0.00291675	0.0719294	0.608459	1.95437	0.0256973	0.239344	1.06646	1.69093	208.43	6.04338	5.1081	0.0016699	0.031618	UP	340.956	6.1955	5.7822	3.98e-05	0.001821	UP	40.8333	5.1172	2.9963	0.16241	0.5102	FALSE	126.51	0.817875	4.1834	7.2732	2.09e-20	1.26e-19	UP	388.447	0.742508	9.0311	2.06e-60	6.6e-59	UP	13.5155	0.74388		0.002508	0.0051922	UP
PGSC0003DMG400031775	ROX1 [Source:PGSC_GENE%3BAcc:PGSC0003DMG400031775]	2.08485	9.82184	110.633	187.773	5.37743	33.7488	178.563	113.794	12513.3	453.253	4.787	0.00099273	0.022396	UP	8204.24	464.663	4.1421	0.00095068	0.018555	UP	2060.01	383.79	2.4243	0.023979	0.17853	FALSE	8248.04	209.589	1.7974	5.2984	2.73e-272	4.37e-269	UP	13375	190.743	6.1318	3.74e-60	1.2e-58	UP	661.246	190.239		8.93e-07	2.6e-06	UP
PGSC0003DMG400029835	Condensin complex subunit 1 [Source:PGSC_GENE%3BAcc:PGSC0003DMG400029835]	0.0185986	0.00858075	0.694097	2.71772	0.0477566	0.0686694	1.02592	1.66222	258.736	14.5041	4.1569	0.0038672	0.056746	FALSE	432.004	14.8692	4.8606	0.00010443	0.0036594	UP	15.0624	12.2813	0.29449	1	1	FALSE	186.403	6.73668	-1.555	4.7902	3.77e-30	3.49e-29	UP	697.535	6.12857	6.8306	6.27e-60	1.99e-58	UP	2.08151	6.11637		0.34734	0.47123	FALSE
PGSC0003DMG400021319	C2 domain-containing protein [Source:PGSC_GENE%3BAcc:PGSC0003DMG400021319]	0.00988199	0.00172613	0.00363879	1.51919	0.546351	0.130748	0.214628	1.48607	40.1554	123.285	-1.6183	0.14469	0.47954	FALSE	287.129	126.388	1.1838	0.27574	0.64016	FALSE	21.3848	104.391	-2.2873	0.056546	0.29406	FALSE	0.725153	2.6588	-2.9596	-1.8744	0.62152	0.7463	FALSE	290.146	2.4143	6.909	7.4e-60	2.35e-58	UP	0.310073	2.41201		0.44324	0.57667	FALSE
PGSC0003DMG400011031	UDP-glucuronosyltransferase [Source:PGSC_GENE%3BAcc:PGSC0003DMG400011031]	0.246138	0.615331	32.119	36.1399	0.297611	1.15039	52.7844	27.3436	4636.07	31.4256	7.2048	2.18e-07	6.96e-05	UP	2462.58	32.2166	6.2562	1.97e-07	3.74e-05	UP	88.3409	26.6094	1.7311	0.31272	0.69407	FALSE	3000.59	31.0003	0.88104	6.5968	1.36e-25	1.04e-24	UP	3224.96	28.2247	6.8362	7.82e-60	2.47e-58	UP	51.8937	28.1771		0.054755	0.09165	FALSE
PGSC0003DMG400012100	Major latex [Source:PGSC_GENE%3BAcc:PGSC0003DMG400012100]	0.288064	0.57478	9.70054	61.5417	1.261	1.56891	13.0978	27.2148	408.124	47.1383	3.114	0.010596	0.11022	FALSE	870.648	48.3249	4.1713	0.00011142	0.0038145	UP	42.5765	39.9142	0.093156	1	1	FALSE	320.675	12.8449	0.55674	4.6418	6.69e-21	4.13e-20	UP	1944.42	11.7013	7.3765	1.05e-59	3.31e-58	UP	17.1536	11.6616		0.43905	0.57214	FALSE
PGSC0003DMG400012646	Conserved gene of unknown function [Source:PGSC_GENE%3BAcc:PGSC0003DMG400012646]	0.0397431	0.190639	0.786867	5.93919	0.213522	0.0975896	1.91284	6.8183	198.078	26.5909	2.8971	0.038703	0.23545	FALSE	727.414	27.2602	4.7379	3.43e-05	0.0016397	UP	8.85596	22.5157	-1.3462	0.34994	0.73125	FALSE	86.6449	5.90451	1.8155	3.8752	4.71e-09	1.53e-08	UP	625.076	5.3832	6.8594	1.85e-59	5.81e-58	UP	18.9361	5.37985		0.078222	0.12673	FALSE
PGSC0003DMG400021869	Conserved gene of unknown function [Source:PGSC_GENE%3BAcc:PGSC0003DMG400021869]	0.011451	0.0184682	3.85695	1.74464	0.0304053	0.0741492	2.95628	1.77248	489.529	6.04338	6.3399	1.47e-05	0.0012669	UP	301.492	6.1955	5.6048	8.33e-05	0.0031479	UP	10.6317	5.1172	1.0549	0.80862	0.99864	FALSE	678.192	2.71525	0.24615	7.9645	1.26e-70	4.21e-69	UP	293.348	2.47585	6.8885	1.98e-59	6.21e-58	UP	2.92897	2.46954		0.98828	1	FALSE
PGSC0003DMG400021383	Oxidoreductase%2C 2OG-Fe(II) oxygenase family protein [Source:PGSC_GENE%3BAcc:PGSC0003DMG400021383]	0.790276	1.68821	33.9468	230.533	2.60593	4.50723	85.027	182.722	2825.15	103.946	4.7644	4.52e-05	0.0026895	UP	6257.95	106.563	5.8759	7.1e-06	0.00052474	UP	130.101	88.0158	0.5638	0.74981	0.97569	FALSE	1198.23	37.5906	0.65541	4.9944	4.32e-09	1.41e-08	UP	7773.5	34.1651	7.8299	1.14e-58	3.5e-57	UP	53.7899	34.1509		0.25543	0.36213	FALSE
PGSC0003DMG400013816	Conserved gene of unknown function [Source:PGSC_GENE%3BAcc:PGSC0003DMG400013816]	0.0294163	0.927728	8.97185	11.8791	0.0348359	0.943354	9.60514	15.4878	277.206	1.20868	7.8414	3.53e-05	0.0023122	UP	459.16	1.2391	8.5336	2.47e-07	4.44e-05	UP	23.4327	1.02344	4.517	0.11341	0.42713	FALSE	275.317	1.21819	4.5399	7.8202	4.54e-59	1.09e-57	UP	349.082	1.11506	8.2903	2.38e-58	7.21e-57	UP	25.6936	1.10454		9.08e-06	2.43e-05	UP
PGSC0003DMG400008643	Conserved gene of unknown function [Source:PGSC_GENE%3BAcc:PGSC0003DMG400008643]	0.0118424	0.037202	0.83792	2.32409	0.124857	0.239554	1.76011	2.5687	199.205	16.9215	3.5573	0.015224	0.13856	FALSE	297.9	17.3474	4.102	0.0012752	0.022548	UP	23.5834	14.3282	0.71892	0.83838	1	FALSE	100.413	1.91314	1.2159	5.7139	1.21e-21	7.69e-21	UP	266.264	1.73347	7.2631	1.21e-57	3.57e-56	UP	4.02613	1.73327		0.47959	0.61438	FALSE
PGSC0003DMG400001523	Cyclin B2 [Source:PGSC_GENE%3BAcc:PGSC0003DMG400001523]	0.00597542	0.00967252	0.00483821	7.77168	0.010529	0.0117611	0.0490693	5.06138	4.71943	1.20868	1.9652	0.78801	0.99169	FALSE	497.787	1.2391	8.6501	1.33e-07	2.86e-05	UP	0.977039	1.02344	-0.066939	1	1	FALSE	0.490693	0.817875	0.25305	-0.73706	1	1	FALSE	753.819	0.742508	9.9876	2.71e-57	7.92e-56	UP	0.8865	0.74388		1	1	FALSE
PGSC0003DMG401001316	Non-cell-autonomous protein pathway1 [Source:PGSC_GENE%3BAcc:PGSC0003DMG401001316]	0.0306552	0.129338	0.373968	3.89425	0.541985	0.142117	0.250317	2.81443	18.0917	47.1383	-1.3816	0.28198	0.65231	FALSE	210.074	48.3249	2.1201	0.079567	0.33612	FALSE	8.85762	39.9142	-2.1719	0.12612	0.44842	FALSE	28.7651	3.18204	1.6352	3.1763	0.00019103	0.00042855	UP	286.65	2.91095	6.6217	2.78e-57	8.12e-56	UP	8.97065	2.88782		0.21057	0.30628	FALSE
PGSC0003DMG400015230	Pectate lyase [Source:PGSC_GENE%3BAcc:PGSC0003DMG400015230]	0.387848	4.60735	16.1374	72.4187	2.69858	8.2034	31.9924	21.7523	2713.87	275.578	3.2998	0.0020634	0.036405	UP	1889.18	282.515	2.7414	0.0044008	0.054545	FALSE	608.789	233.344	1.3835	0.2161	0.58033	FALSE	1457.62	47.2271	3.1317	4.9479	1.52e-142	2.32e-140	UP	6248.6	42.8969	7.1865	3.33e-57	9.67e-56	UP	375.721	42.8675		1.03e-05	2.75e-05	UP
PGSC0003DMG400000929	Conserved gene of unknown function [Source:PGSC_GENE%3BAcc:PGSC0003DMG400000929]	0.0191011	0.0697839	0.487719	4.59226	0.0140299	0.217361	0.787262	3.6209	56.5909	1.20868	5.5491	0.026207	0.19068	FALSE	267.27	1.2391	7.7529	1.03e-05	0.00067856	UP	13.5647	1.02344	3.7284	0.276	0.65464	FALSE	37.1585	1.96385	1.428	4.2419	5.41e-07	1.52e-06	UP	334.368	1.79589	7.5406	1.1e-56	3.16e-55	UP	4.79827	1.78328		0.46181	0.59568	FALSE
PGSC0003DMG400003345	Cytochrome P450 [Source:PGSC_GENE%3BAcc:PGSC0003DMG400003345]	0.0212398	0.147713	1.12508	2.59879	0	0.0251945	0.0115418	0.0608146	1.20438	0	Inf	1	1	FALSE	6.656	0	Inf	0.3282	0.69732	FALSE	2.39741	0	Inf	0.74065	0.97235	FALSE	127.792	3.25426	2.3592	5.2953	1.64e-24	1.19e-23	UP	282.041	2.97263	6.568	1.24e-56	3.55e-55	UP	15.1516	2.95296		0.021667	0.039253	UP
PGSC0003DMG400023815	Expansin [Source:PGSC_GENE%3BAcc:PGSC0003DMG400023815]	0.781765	11.8791	58.6599	68.3428	4.73056	139.656	108.029	45.4421	6431.55	338.429	4.2482	0.0006115	0.016109	UP	2776.61	346.948	3.0005	0.0028019	0.0393	UP	7241.01	286.563	4.6593	0.00049927	0.014609	UP	3712.15	66.7069	3.4848	5.7983	2.32e-243	2.23e-240	UP	4131.82	60.7195	6.0885	2.17e-56	6.19e-55	UP	678.751	60.6297		5.29e-32	5.79e-31	UP
PGSC0003DMG400031816	Pectinesterase [Source:PGSC_GENE%3BAcc:PGSC0003DMG400031816]	0.0766165	2.09572	14.7451	12.3209	0.10498	0.760581	11.442	16.4896	1206.65	13.2954	6.5039	4.77e-07	0.00011349	UP	1790.19	13.6301	7.0372	1.91e-08	7.17e-06	UP	69.4421	11.2578	2.6249	0.15379	0.49705	FALSE	1652.65	11.5717	4.3336	7.158	9.35e-18	4.99e-17	UP	1318.57	10.5219	6.9694	2.29e-56	6.52e-55	UP	211.999	10.5145		5.59e-08	1.8e-07	UP
PGSC0003DMG400026854	Endochitinase 2 [Source:PGSC_GENE%3BAcc:PGSC0003DMG400026854]	0.755738	17.5294	19.3806	73.0289	1.677	18.7693	18.497	37.3607	1115.14	122.076	3.1914	0.0024174	0.040849	UP	2327.19	125.149	4.2169	7.64e-05	0.0029879	UP	982.938	103.367	3.2493	0.0044643	0.062818	FALSE	1248.35	65.6083	4.0955	4.25	4.56e-15	2.12e-14	UP	4492.71	59.6665	6.2345	3.39e-56	9.58e-55	UP	1019.08	59.6131		4.18e-56	1.08e-54	UP
Novel01675	PREDICTED: peroxidase 49-like [Solanum tuberosum]	0.802484	3.24047	23.7435	71.0889	1.21111	8.61391	36.772	57.1128	1189.67	47.1383	4.6575	5.21e-05	0.0029534	UP	1905.2	48.3249	5.301	2.61e-06	0.00025184	UP	243.097	39.9142	2.6066	0.056901	0.29533	FALSE	817.563	37.2544	1.5723	4.4558	9.29e-44	1.41e-42	UP	2338.17	33.918	6.1072	5.88e-56	1.66e-54	UP	100.714	33.8676		1.52e-05	3.99e-05	UP
PGSC0003DMG400024725	Deoxyuridine 5'-triphosphate nucleotidohydrolase [Source:PGSC_GENE%3BAcc:PGSC0003DMG400024725]	0.0975181	0.469903	25.1953	9.00004	0.301008	1.86956	15.6857	8.57705	735.745	16.9215	5.4423	2.02e-05	0.0015682	UP	412.051	17.3474	4.57	0.00022565	0.0064613	UP	76.0083	14.3282	2.4073	0.16953	0.52142	FALSE	1253.14	6.53726	1.8274	7.5827	3.76e-55	7.97e-54	UP	427.603	5.94093	6.1694	9.71e-56	2.71e-54	UP	21.0938	5.94352		0.022237	0.040203	UP
PGSC0003DMG400003384	Origin-recognition complex subunit 6 [Source:PGSC_GENE%3BAcc:PGSC0003DMG400003384]	0.0192052	0.172425	12.1472	4.18928	0	0.464139	6.43303	3.79258	382.826	0	Inf	1.08e-06	0.00020348	UP	231.782	0	Inf	6e-06	0.00046151	UP	23.9594	0	Inf	0.053103	0.28391	FALSE	767.7	1.63575	2.7251	8.8744	8.99e-56	1.95e-54	UP	253.162	1.48502	7.4134	5.31e-55	1.45e-53	UP	9.83724	1.48776		0.049004	0.082894	FALSE
PGSC0003DMG400003057	Osmotin [Source:PGSC_GENE%3BAcc:PGSC0003DMG400003057]	0.0363551	0.260574	1.99854	5.06243	0.216763	2.51803	1.29979	7.2101	66.3057	13.2954	2.3182	0.20068	0.55685	FALSE	378.824	13.6301	4.7967	0.00017828	0.0053984	UP	110.6	11.2578	3.2963	0.048391	0.27063	FALSE	108.451	2.6588	2.405	5.3501	1.17e-21	7.49e-21	UP	262.517	2.4143	6.7647	7.66e-55	2.08e-53	UP	12.7749	2.41201		0.26709	0.37616	FALSE
PGSC0003DMG400011792	ATP binding protein [Source:PGSC_GENE%3BAcc:PGSC0003DMG400011792]	0.0122666	0.231682	1.07184	1.80425	0.0351698	0.35865	0.113424	0.585295	15.9885	6.04338	1.4036	0.66299	0.9344	FALSE	85.6814	6.1955	3.7897	0.023973	0.16574	FALSE	44.9424	5.1172	3.1347	0.14134	0.47356	FALSE	162.92	2.51436	3.8003	6.0178	3.15e-33	3.3e-32	UP	262.313	2.29094	6.8392	1.15e-54	3.11e-53	UP	31.7875	2.28174		4.32e-06	1.19e-05	UP
PGSC0003DMG400013001	Conserved gene of unknown function [Source:PGSC_GENE%3BAcc:PGSC0003DMG400013001]	0.0137957	0.0289888	0.020668	16.5696	0.0899559	0.0148997	0.0456204	8.49371	2.05093	4.8347	-1.2372	0.54333	0.85953	FALSE	390.671	4.9564	6.3005	9.61e-06	0.00064615	UP	0.565489	4.09376	-2.8559	0.28086	0.65726	FALSE	0.981385	0.884351	0.62991	0.1502	1	1	FALSE	752.42	0.805055	9.8682	3.6e-54	9.6e-53	UP	1.24029	0.801497		0.95685	1	FALSE
PGSC0003DMG400026309	ROPGEF5 (ROP GUANINE NUCLEOTIDE EXCHANGE FACTOR 5) [Source:PGSC_GENE%3BAcc:PGSC0003DMG400026309]	0.00985584	0.00975609	0.0189545	4.95277	0.0104249	0.0377738	0.0699544	4.6266	6.64819	1.20868	2.4595	0.62855	0.9162	FALSE	459.29	1.2391	8.534	2.42e-07	4.41e-05	UP	3.18777	1.02344	1.6391	0.90436	1	FALSE	1.941	1.36264	-0.45374	0.5104	0.84272	0.93603	FALSE	485.217	1.23842	8.614	7.73e-54	2.03e-52	UP	0.901593	1.23481		1	1	FALSE
PGSC0003DMG400006713	Cembratrienol synthase 2a [Source:PGSC_GENE%3BAcc:PGSC0003DMG400006713]	0.013057	0.0434706	1.70147	2.17647	0.483635	0.157921	3.17891	3.49345	356.218	65.2685	2.4483	0.042578	0.24807	FALSE	403.842	66.9114	2.5935	0.01699	0.13369	FALSE	15.2666	55.2658	-1.856	0.15594	0.50083	FALSE	203.076	2.10255	1.2976	6.5937	2.34e-29	2.08e-28	UP	248.405	1.92012	7.0154	4.61e-53	1.19e-51	UP	4.68532	1.90604		0.46138	0.59527	FALSE
PGSC0003DMG400006020	Cyclin A1 [Source:PGSC_GENE%3BAcc:PGSC0003DMG400006020]	0.00955199	0.0216491	0.0669312	6.12043	0.24978	0.0774495	0.203343	5.30357	17.3108	25.3822	-0.55214	0.61946	0.91112	FALSE	461.783	26.0211	4.1495	0.0004299	0.010433	UP	5.75313	21.4922	-1.9014	0.20053	0.56045	FALSE	6.00849	1.15746	0.73738	2.376	0.23844	0.33442	FALSE	525.604	1.05165	8.9652	5.31e-53	1.37e-51	UP	1.75791	1.05444		0.89879	0.98414	FALSE
PGSC0003DMG400006941	Conserved gene of unknown function [Source:PGSC_GENE%3BAcc:PGSC0003DMG400006941]	0.0187792	0.179538	1.02445	3.64559	0.0665011	0.732393	2.22099	3.46532	168.385	6.04338	4.8003	0.0040735	0.058538	FALSE	269.811	6.1955	5.4446	0.00015996	0.0049735	UP	48.5417	5.1172	3.2458	0.1221	0.44469	FALSE	82.3653	2.03607	2.8164	5.3382	1.14e-16	5.76e-16	UP	280.124	1.85757	7.2365	5.61e-53	1.44e-51	UP	13.0207	1.84842		0.018399	0.03374	UP
PGSC0003DMG400010892	Conserved gene of unknown function [Source:PGSC_GENE%3BAcc:PGSC0003DMG400010892]	0.0102439	0.031423	2.35529	2.10293	0.00869774	0.323022	0.73665	2.10317	84.6115	1.20868	6.1294	0.0076999	0.089307	FALSE	250.253	1.2391	7.658	1.56e-05	0.00093657	UP	32.3027	1.02344	4.9802	0.065167	0.31803	FALSE	289.591	1.69795	1.1678	7.4141	1.3e-33	1.38e-32	UP	247.309	1.5457	7.3219	7.47e-53	1.91e-51	UP	3.48875	1.55281		0.68734	0.81506	FALSE
PGSC0003DMG400023758	Cyclin-like F-box [Source:PGSC_GENE%3BAcc:PGSC0003DMG400023758]	0.0353751	0.0484793	0.915707	3.07149	0.0468345	0.0835485	0.80514	2.33284	68.971	4.8347	3.8345	0.055051	0.28584	FALSE	206.269	4.9564	5.3791	0.00041908	0.010292	UP	6.21494	4.09376	0.60231	1	1	FALSE	83.6008	4.35528	0.017296	4.2627	1.38e-14	6.25e-14	UP	268.049	3.96273	6.0799	1.67e-52	4.21e-51	UP	3.9975	3.94987		0.96674	1	FALSE
PGSC0003DMG400006731	Aromatic amino acid decarboxylase 1A [Source:PGSC_GENE%3BAcc:PGSC0003DMG400006731]	0.0130604	0	0.106498	3.06915	0.232	0.238044	6.82956	30.824	593.151	24.1735	4.6169	0.00023959	0.0085532	UP	2750.12	24.782	6.7941	5.69e-08	1.6e-05	UP	17.9684	20.4688	-0.18797	0.7611	0.98294	FALSE	9.81369	1.62426	#NAME?	2.595	0.068	0.10841	FALSE	270.599	1.48675	7.5079	2.53e-52	6.33e-51	UP	0	1.47272		0.48889	0.62345	FALSE
PGSC0003DMG400006751	F-box and wd40 domain protein [Source:PGSC_GENE%3BAcc:PGSC0003DMG400006751]	0.0213768	0.074425	0.0903726	4.64959	0.0902264	0.189923	0.154416	3.42176	13.9226	9.6694	0.52593	0.98285	1	FALSE	314.846	9.9128	4.9892	0.00021857	0.0063022	UP	14.5443	8.18752	0.82895	0.80693	0.99864	FALSE	8.54944	2.73102	1.3608	1.6464	0.39162	0.51321	FALSE	421.252	2.47598	7.4105	3.87e-52	9.62e-51	UP	6.36217	2.47715		0.32738	0.44738	FALSE
PGSC0003DMG400009006	BRCA1 C Terminus domain containing protein [Source:PGSC_GENE%3BAcc:PGSC0003DMG400009006]	0.0107158	0.0449303	1.12945	1.11113	0.0349169	0.0548567	0.951215	0.751407	219.125	9.6694	4.5022	0.0032909	0.050802	FALSE	177.949	9.9128	4.166	0.0036602	0.047691	UP	11.0947	8.18752	0.43837	1	1	FALSE	276.686	3.53887	1.6236	6.2888	3.55e-53	7.13e-52	UP	260.237	3.21749	6.3377	9.07e-52	2.22e-50	UP	9.92482	3.22094		0.19201	0.28267	FALSE
PGSC0003DMG400007335	Apyrase 3 [Source:PGSC_GENE%3BAcc:PGSC0003DMG400007335]	0.468733	0.970263	6.71361	40.9556	3.8813	6.68389	28.619	60.071	2270.18	371.063	2.6131	0.010643	0.11051	FALSE	4916.22	380.404	3.6919	0.00096113	0.01868	UP	462.431	314.196	0.55757	0.64994	0.92372	FALSE	567.91	53.4423	0.61222	3.4096	1.15e-10	4.13e-10	UP	3308.83	48.6036	6.0891	1.26e-51	3.08e-50	UP	74.0888	48.468		0.23071	0.33149	FALSE
PGSC0003DMG400000779	Extensin (ext) [Source:PGSC_GENE%3BAcc:PGSC0003DMG400000779]	0.552828	3.25058	35.7614	92.3768	0.225305	3.85534	41.4772	73.3547	3140.32	20.5475	7.2558	7.31e-08	3.23e-05	UP	5742.07	21.0647	8.0906	2.23e-08	7.88e-06	UP	256.876	17.3985	3.884	0.0085762	0.094119	FALSE	2884.21	60.1318	2.116	5.5839	3.16e-105	2.39e-103	UP	7117.84	54.7218	7.0232	1.29e-51	3.14e-50	UP	236.742	54.6138		6.3e-16	3.32e-15	UP
PGSC0003DMG400024505	Chromosome-associated kinesin KIF4A [Source:PGSC_GENE%3BAcc:PGSC0003DMG400024505]	0.00715536	0.0437095	0.025738	2.01093	0.00896096	0.050996	0.0763481	1.6131	8.50093	1.20868	2.8142	0.51289	0.83594	FALSE	186.402	1.2391	7.233	8.72e-05	0.0032321	UP	4.96917	1.02344	2.2796	0.70285	0.95048	FALSE	3.07219	1.15172	2.1676	1.4155	0.64488	0.76734	FALSE	229.515	1.05251	7.7686	1.83e-51	4.44e-50	UP	4.70353	1.04692		0.30506	0.42175	FALSE
PGSC0003DMG400000627	AtEB1b [Source:PGSC_GENE%3BAcc:PGSC0003DMG400000627]	0.0181124	0.00560031	0.320731	4.51816	0.153786	0.110067	1.27937	4.69692	66.998	9.6694	2.7926	0.13784	0.46713	FALSE	253.317	9.9128	4.6755	0.00070632	0.015017	UP	5.05883	8.18752	-0.69462	0.60569	0.89839	FALSE	17.8335	1.35836	-2.142	3.7147	0.002293	0.0045598	UP	240.14	1.23656	7.6014	2.32e-51	5.61e-50	UP	0.281446	1.24225		0.68665	0.81451	FALSE
PGSC0003DMG400024627	GRP 2 [Source:PGSC_GENE%3BAcc:PGSC0003DMG400024627]	0.468801	10.1915	15.424	51.0071	2.85091	285.893	34.516	37.0312	2300.08	227.231	3.3395	0.0017287	0.032326	UP	2507.09	232.951	3.4279	0.00078969	0.016416	UP	16600.3	192.407	6.4309	0.0001683	0.0067993	UP	1087.27	44.5645	4.0031	4.6087	5.59e-112	4.8e-110	UP	3435.63	40.5482	6.4048	2.41e-51	5.81e-50	UP	648.739	40.4602		2.79e-27	2.51e-26	UP
PGSC0003DMG400018290	Serine/threonine-protein kinase Haspin [Source:PGSC_GENE%3BAcc:PGSC0003DMG400018290]	0.0386036	0.125794	1.72705	3.88199	0	0.137847	0.95109	3.19562	61.8474	0	Inf	0.0080991	0.092288	FALSE	213.487	0	Inf	1.01e-05	0.00067019	UP	7.84906	0	Inf	0.28888	0.66525	FALSE	119.178	3.59385	1.2641	5.0514	3.06e-22	2.01e-21	UP	256.041	3.28177	6.2858	4.45e-51	1.07e-49	UP	7.83848	3.26352		0.33491	0.4566	FALSE
PGSC0003DMG400026944	UPF0497 membrane protein 8 [Source:PGSC_GENE%3BAcc:PGSC0003DMG400026944]	0.493404	23.5903	43.1948	50.4851	1.53927	94.8904	113.156	105.373	4238.01	68.8945	5.9429	3.93e-06	0.00051788	UP	4043.5	70.6287	5.8392	2e-06	0.00020469	UP	3085.94	58.3361	5.7252	1.18e-05	0.00097016	UP	1709.8	26.337	5.1389	6.0206	4.59e-122	4.74e-120	UP	1909.9	23.9531	6.3171	4.5e-51	1.08e-49	UP	843.216	23.9319		4.83e-52	1.11e-50	UP
PGSC0003DMG400012288	Endo-beta-1%2C4-D-glucanase [Source:PGSC_GENE%3BAcc:PGSC0003DMG400012288]	0.605513	3.86319	48.1259	78.3768	2.79185	29.5349	110.748	32.7316	9665.51	292.499	5.0463	0.00029308	0.0097493	UP	2924.56	299.862	3.2858	0.0013341	0.023359	UP	2244.85	247.672	3.1801	0.0045356	0.063424	FALSE	4459.4	75.6599	2.2332	5.8812	5.66e-264	7.07e-261	UP	6939	68.8311	6.6555	2.31e-50	5.4e-49	UP	323.165	68.7325		4.87e-09	1.7e-08	UP
PGSC0003DMG400000422	Retinoid-inducible serine carboxypeptidase [Source:PGSC_GENE%3BAcc:PGSC0003DMG400000422]	0.0269885	0.065117	0.934993	3.03001	0.024848	0.284762	0.728054	0.660058	58.9934	2.41735	4.6091	0.041086	0.24318	FALSE	55.1387	2.4782	4.4757	0.026422	0.17528	FALSE	20.2802	2.04688	3.3086	0.23782	0.60691	FALSE	80.4499	3.13134	0.83271	4.6832	2.73e-15	1.28e-14	UP	249.21	2.84853	6.451	2.37e-50	5.55e-49	UP	5.05421	2.83781		0.56266	0.69762	FALSE
PGSC0003DMG400025912	Methylketone synthase Ib [Source:PGSC_GENE%3BAcc:PGSC0003DMG400025912]	0.045621	0.0118633	0.96384	41.8761	0.0756436	0.0211239	0.457463	6.01159	24.3147	4.8347	2.3303	0.36967	0.7413	FALSE	327.522	4.9564	6.0462	2.97e-05	0.001491	UP	0.977039	4.09376	-2.0669	0.36567	0.74618	FALSE	54.5194	3.47667	-2.3829	3.971	1.41e-05	3.52e-05	UP	2261.63	3.15681	9.4847	2.99e-50	6.94e-49	UP	0.605054	3.15589		0.40952	0.54001	FALSE
PGSC0003DMG400028078	Metalloendopeptidase [Source:PGSC_GENE%3BAcc:PGSC0003DMG400028078]	0.0867626	0.315477	3.13819	8.53638	0.287693	0.278613	2.59356	9.1265	189.663	25.3822	2.9016	0.040889	0.24266	FALSE	690.269	26.0211	4.7294	4.19e-05	0.0018797	UP	17.8621	21.4922	-0.26692	0.75075	0.97606	FALSE	244.914	9.12811	1.425	4.7458	5.37e-18	2.9e-17	UP	637.734	8.29541	6.2645	3.7e-50	8.55e-49	UP	22.2416	8.28295		0.24716	0.35222	FALSE
PGSC0003DMG400015523	Chitinase 1 [Source:PGSC_GENE%3BAcc:PGSC0003DMG400015523]	0.301986	3.41198	5.23494	59.2792	1.35224	9.11136	8.11089	37.2394	488.302	97.9027	2.3184	0.03829	0.2341	FALSE	2305.38	100.367	4.5216	3.12e-05	0.001537	UP	479.257	82.8986	2.5314	0.036571	0.23101	FALSE	335.27	26.0739	3.0584	3.6846	3.21e-39	4.21e-38	UP	3626.02	23.7075	7.2569	2.77e-49	6.2e-48	UP	197.252	23.679		2.83e-22	2.03e-21	UP
PGSC0003DMG400009109	Trehalose-6-phosphate synthase [Source:PGSC_GENE%3BAcc:PGSC0003DMG400009109]	0.00992548	0.108172	0.339173	3.08764	0.58303	0.732702	0.703026	1.10196	47.2973	47.1383	0.0048579	0.88591	1	FALSE	75.5781	48.3249	0.6452	0.67893	0.93799	FALSE	42.8301	39.9142	0.10172	1	1	FALSE	24.2607	0.956571	3.0117	4.6646	0.0067274	0.012594	UP	211.029	0.866736	7.9276	4.91e-49	1.09e-47	UP	6.98947	0.866634		0.071459	0.11669	FALSE
PGSC0003DMG400024528	Transposase Tam3 [Source:PGSC_GENE%3BAcc:PGSC0003DMG400024528]	0.00509126	0.00247116	0.0341558	3.49318	0.0536782	0.0319211	0.0043841	3.40703	0.582165	8.46073	-3.8613	0.10493	0.40703	FALSE	459.869	8.6737	5.7284	1.45e-05	0.00088189	UP	3.62445	7.16408	-0.98302	0.57417	0.87963	FALSE	4.75979	0.956571	-1.4828	2.315	0.24759	0.34564	FALSE	465.264	0.866736	9.0682	7.57e-49	1.66e-47	UP	0.310073	0.866634		0.94861	1	FALSE
PGSC0003DMG400012774	Conserved gene of unknown function [Source:PGSC_GENE%3BAcc:PGSC0003DMG400012774]	0.0112454	0.512416	2.30583	4.36815	0.2175	8.71912	10.1833	10.0424	470.16	12.0868	5.2817	0.0001149	0.0051118	UP	477.049	12.391	5.2668	3.24e-05	0.0015732	UP	349.472	10.2344	5.0937	0.00062322	0.01727	UP	113.353	0.745655	5.0656	7.2481	5.49e-26	4.27e-25	UP	205.425	0.680826	8.2371	9.18e-48	1.93e-46	UP	22.7301	0.678743		1.55e-05	4.05e-05	UP
PGSC0003DMG400023953	Receptor-like kinase [Source:PGSC_GENE%3BAcc:PGSC0003DMG400023953]	0.00174981	0.00579629	0.00273309	1.20016	0.0745988	0.0138881	0.00177705	1.09049	0.291082	14.5041	-5.6389	0.02007	0.16402	FALSE	181.688	14.8692	3.6111	0.0083513	0.083935	FALSE	1.95408	12.2813	-2.6519	0.15085	0.49124	FALSE	0.468921	0.406065	1.2896	0.20764	1	1	FALSE	197.397	0.371687	9.0528	1.41e-47	2.94e-46	UP	0.900034	0.36818		0.92909	1	FALSE
PGSC0003DMG400029620	Chalcone synthase 1B [Source:UniProtKB/Swiss-Prot%3BAcc:Q43163]	3.51392	32.356	546.489	634.767	7.55152	27.1832	1010.87	1546.41	78996.7	707.075	6.8038	0.03185	0.21235	FALSE	124141	724.874	7.42	0.091639	0.36218	FALSE	1849.79	598.712	1.6274	0.12373	0.44708	FALSE	45249.9	392.387	2.7635	6.8495	5.61e-105	4.21e-103	UP	50357.1	356.868	7.1407	2.89e-47	5.98e-46	UP	2419.29	356.285		1.09e-09	4e-09	UP
PGSC0003DMG402023713	Polychome%2C UV-B-insensitive 4 [Source:PGSC_GENE%3BAcc:PGSC0003DMG402023713]	0.00404031	0.0149911	1.93452	3.28907	0.137219	0.0440012	1.62874	2.38178	95.6693	9.6694	3.3066	0.058033	0.29589	FALSE	143.572	9.9128	3.8563	0.0088545	0.087333	FALSE	2.23682	8.18752	-1.872	0.31795	0.69929	FALSE	120.571	0.33959	1.4429	8.4719	7.39e-29	6.45e-28	UP	195.967	0.30914	9.3081	2.9e-47	5.98e-46	UP	0.844339	0.310563		0.93746	1	FALSE
PGSC0003DMG400009913	Conserved gene of unknown function [Source:PGSC_GENE%3BAcc:PGSC0003DMG400009913]	0.0222768	0.535785	1.72245	4.08788	0.0985287	2.0949	5.53581	3.0954	282.755	6.04338	5.5481	0.00037425	0.011566	UP	162.55	6.1955	4.7135	0.0020764	0.031853	UP	93.5595	5.1172	4.1925	0.025259	0.18478	FALSE	93.4713	1.63001	4.1483	5.8416	9.62e-20	5.63e-19	UP	211.988	1.48588	7.1565	4.56e-47	9.35e-46	UP	26.2485	1.48024		1.55e-05	4.07e-05	UP
PGSC0003DMG400014895	ISWI chromatin remodeling complex ATPase ISW1 [Source:PGSC_GENE%3BAcc:PGSC0003DMG400014895]	0.0072795	0.0663992	1.3982	1.37278	0.0471828	0.325579	1.56613	1.38527	233.417	8.46073	4.786	0.0019043	0.034603	UP	212.323	8.6737	4.6135	0.0012163	0.021949	UP	42.3179	7.16408	2.5624	0.21504	0.5789	FALSE	221.781	1.55778	2.75	7.1535	3.54e-47	6.02e-46	UP	208.132	1.4242	7.1912	2.92e-46	5.85e-45	UP	9.51937	1.4151		0.057696	0.096106	FALSE
PGSC0003DMG400020230	Zinc finger (C3HC4-type RING finger) family protein [Source:PGSC_GENE%3BAcc:PGSC0003DMG400020230]	0.0519069	0	0.0405283	4.51833	0.0590828	0.0306066	0.0531529	2.85626	2.76141	3.62603	-0.39298	0.7874	0.99162	FALSE	149.915	3.7173	5.3337	0.0011703	0.021356	UP	1.34376	3.07032	-1.1921	0.5729	0.87934	FALSE	2.19723	3.80049	#NAME?	-0.7905	0.71877	0.83704	FALSE	234.437	3.46581	6.0799	3.3e-46	6.61e-45	UP	0	3.45885		0.11443	0.17853	FALSE
PGSC0003DMG401000668	Glycosyl hydrolase family 9 [Source:PGSC_GENE%3BAcc:PGSC0003DMG401000668]	0.00758332	0.256053	1.13963	4.97345	1.55177	4.82712	9.17099	2.63759	919.539	186.136	2.3046	0.024136	0.1826	FALSE	269.088	190.821	0.49585	0.6614	0.93322	FALSE	422.09	157.61	1.4212	0.22898	0.59864	FALSE	120.908	1.08524	4.6306	6.7997	1.88e-14	8.43e-14	UP	504.144	0.989966	8.9922	4.41e-46	8.79e-45	UP	24.5063	0.989306		1.79e-05	4.67e-05	UP
PGSC0003DMG400038332	Subtilisin-like protease [Source:PGSC_GENE%3BAcc:PGSC0003DMG400038332]	0.0118248	0.192033	0.426462	1.55739	0.258412	1.94378	1.46653	2.26323	198.876	42.3036	2.233	0.096022	0.38685	FALSE	317.424	43.3685	2.8717	0.013151	0.11278	FALSE	229.772	35.8204	2.6814	0.05404	0.28693	FALSE	61.7576	2.30918	3.579	4.7412	1.09e-11	4.2e-11	UP	215.791	2.10416	6.6802	1.16e-45	2.29e-44	UP	25.1122	2.10137		0.00011357	0.00027248	UP
PGSC0003DMG400026022	Beta expansin 1 [Source:PGSC_GENE%3BAcc:PGSC0003DMG400026022]	0.182468	0.19584	0.109826	22.4822	2.24554	0.502331	0.778403	3.7588	54.1674	186.136	-1.7809	0.079294	0.34704	FALSE	262.535	190.821	0.46028	0.66915	0.93799	FALSE	30.6426	157.61	-2.3627	0.034359	0.22319	FALSE	8.05536	18.0304	-0.33507	-1.1624	0.69013	0.81041	FALSE	1578.62	16.3446	6.5937	2.1e-45	4.11e-44	UP	12.9501	16.3358		0.96794	1	FALSE
PGSC0003DMG400015726	Glutathione s-transferase [Source:PGSC_GENE%3BAcc:PGSC0003DMG400015726]	0.140674	1.38551	9.47722	17.9765	0.482228	2.12031	27.1212	53.8433	1301.88	27.7995	5.5494	4.81e-06	0.00059606	UP	2662.67	28.4993	6.5458	1.06e-07	2.5e-05	UP	88.5813	23.5391	1.9119	0.24916	0.62409	FALSE	483.125	9.67908	2.8606	5.6414	1.98e-33	2.09e-32	UP	877.876	8.85793	6.6309	6.1e-45	1.18e-43	UP	63.7605	8.7787		6.06e-08	1.94e-07	UP
PGSC0003DMG400006183	Aquaporin [Source:PGSC_GENE%3BAcc:PGSC0003DMG400006183]	0.0760484	0.0905583	0.657788	7.84752	0.381619	0.0970899	0.757479	4.81179	44.0467	26.5909	0.7281	0.76567	0.9813	FALSE	288.067	27.2602	3.4015	0.0056072	0.064325	FALSE	4.85341	22.5157	-2.2139	0.15648	0.50155	FALSE	40.5145	6.32059	-0.19036	2.6803	0.00033433	0.00073065	UP	463.113	5.75588	6.3302	1.41e-44	2.69e-43	UP	5.03755	5.74811		0.91312	0.99615	FALSE
PGSC0003DMG400009216	Parallel spindle 1 [Source:PGSC_GENE%3BAcc:PGSC0003DMG400009216]	0.0113591	0	0.0406644	3.07174	0.064297	0.0243137	0.0628358	2.78976	3.87751	4.8347	-0.31829	0.80051	0.99707	FALSE	179.731	4.9564	5.1804	0.00082592	0.016819	UP	1.3625	4.09376	-1.5872	0.44232	0.80712	FALSE	2.70427	1.01877	#NAME?	1.4084	0.72225	0.83912	FALSE	195.423	0.927419	7.7192	1.55e-44	2.96e-43	UP	0	0.931689		0.65343	0.78237	FALSE
PGSC0003DMG400001823	Ent-kaurenoic acid oxidase [Source:PGSC_GENE%3BAcc:PGSC0003DMG400001823]	0.0253624	2.13507	1.23475	2.19085	0.0514886	8.00485	2.22137	6.88516	217.919	6.04338	5.1723	0.0013258	0.027017	UP	694.792	6.1955	6.8092	3.19e-07	5.24e-05	UP	679.588	5.1172	7.0532	3.49e-06	0.00039972	UP	128.127	3.54889	5.9574	5.1741	1e-15	4.79e-15	UP	217.512	3.21849	6.0786	1.71e-44	3.25e-43	UP	200.145	3.22103		1.53e-07	4.73e-07	UP
PGSC0003DMG400013111	Ubiquitin-protein ligase [Source:PGSC_GENE%3BAcc:PGSC0003DMG400013111]	0.0731784	0.678634	4.7957	6.50318	0.14255	0.974525	3.41253	4.60862	240.917	12.0868	4.317	0.0034363	0.052394	FALSE	334.221	12.391	4.7534	0.0002628	0.0072807	UP	59.5757	10.2344	2.5413	0.18548	0.54473	FALSE	359.824	7.40156	2.7676	5.6033	1.31e-16	6.59e-16	UP	465.942	6.74399	6.1104	1.82e-44	3.45e-43	UP	45.9296	6.74485		2.19e-05	5.66e-05	UP
PGSC0003DMG400002614	ESTs AU078251(R0889) [Source:PGSC_GENE%3BAcc:PGSC0003DMG400002614]	0.0308935	0.00570427	0.00924943	3.68321	0.0177011	0.0139087	0.00561838	3.43218	0.3265	1.20868	-1.8883	0.68665	0.9413	FALSE	200.933	1.2391	7.3413	5.74e-05	0.0023998	UP	0.694294	1.02344	-0.55981	0.92422	1	FALSE	0.558838	2.51582	-2.8889	-2.1705	0.4478	0.5732	FALSE	212.667	2.28821	6.5382	2.5e-44	4.69e-43	UP	0.310073	2.29669		0.39515	0.52418	FALSE
PGSC0003DMG400017513	Acetylornithine deacetylase [Source:PGSC_GENE%3BAcc:PGSC0003DMG400017513]	0.0882871	0.794079	3.20491	20.2119	0.366344	4.35591	1.8702	14.9311	143.595	33.8429	2.0851	0.15078	0.49061	FALSE	1188.64	34.6948	5.0984	5.61e-06	0.00043804	UP	286.651	28.6563	3.3224	0.014372	0.13083	FALSE	261.875	9.72786	2.7328	4.7506	2.42e-36	2.83e-35	UP	1580.18	8.8556	7.4793	2.73e-44	5.12e-43	UP	58.6057	8.81646		0.00025635	0.0005929	UP
Novel00670	PREDICTED: glucan endo-1,3-beta-D-glucosidase-like [Solanum tuberosum]	0.100545	0.136524	0.0624399	17.3382	0	0.0363999	0.0765825	9.50125	0.873247	0	Inf	1	1	FALSE	110.159	0	Inf	0.00035251	0.009088	UP	0.35367	0	Inf	1	1	FALSE	0.746925	1.62426	0.0036606	-1.1207	0.84396	0.93705	FALSE	198.514	1.48675	7.0609	3.12e-44	5.84e-43	UP	1.47646	1.47272		1	1	FALSE
PGSC0003DMG400013265	EH-domain-containing protein 1 [Source:PGSC_GENE%3BAcc:PGSC0003DMG400013265]	0.0842008	2.09061	1.59202	14.1212	0.24192	1.68195	1.38801	10.3852	86.7017	18.1301	2.2577	0.1801	0.52603	FALSE	666.274	18.5865	5.1638	1.46e-05	0.00088763	UP	91.2295	15.3516	2.5711	0.13159	0.45812	FALSE	105.524	7.52877	4.1903	3.809	4.72e-15	2.19e-14	UP	894.231	6.86995	7.0242	4.02e-44	7.48e-43	UP	125.102	6.85256		1.6e-20	1.05e-19	UP
PGSC0003DMG400001227	Gibberellin regulated protein [Source:PGSC_GENE%3BAcc:PGSC0003DMG400001227]	0.0913974	0.265169	2.64295	20.0932	0.264753	8.17391	10.5647	5.84531	240.502	7.25205	5.0515	0.0012023	0.025427	UP	136.773	7.4346	4.2014	0.0061172	0.068346	FALSE	162.577	6.14064	4.7266	0.0055761	0.071969	FALSE	64.0605	2.9869	1.0963	4.4227	1.79e-09	6e-09	UP	465.122	2.72517	7.4151	4.75e-44	8.82e-43	UP	5.78886	2.70753		0.48948	0.62406	FALSE
PGSC0003DMG400025304	DNA-binding protein MNB1B [Source:PGSC_GENE%3BAcc:PGSC0003DMG400025304]	0.0208583	0.260967	23.7221	9.23152	0.397129	0.285598	20.2001	7.49727	923.339	21.7562	5.4074	1.2e-05	0.0011269	UP	351.745	22.3038	3.9792	0.0011622	0.021289	UP	11.3727	18.4219	-0.69585	0.54038	0.86044	FALSE	1149.63	1.36264	3.2098	9.7206	2.26e-165	5.96e-163	UP	427.302	1.23842	8.4306	7.72e-44	1.42e-42	UP	11.4249	1.23481		0.12407	0.1919	FALSE
PGSC0003DMG402015689	Protein RSI-1 [Source:PGSC_GENE%3BAcc:PGSC0003DMG402015689]	0.783117	1.81173	20.3192	145.506	10.7023	56.6588	79.7936	53.2997	2494.8	400.072	2.6406	0.010332	0.10853	FALSE	1699.4	410.142	2.0508	0.026913	0.1776	FALSE	1534.79	338.759	2.1797	0.042081	0.2504	FALSE	671.891	34.9041	0.77016	4.2668	3.66e-76	1.43e-74	UP	4595.1	31.685	7.1802	9.57e-44	1.76e-42	UP	54.0955	31.719		0.19674	0.28867	FALSE
PGSC0003DMG400004842	Beta-galactosidase [Source:PGSC_GENE%3BAcc:PGSC0003DMG400004842]	0.0251604	0.125386	1.34195	8.00815	0.18337	0.656503	2.44713	4.02919	309.06	27.7995	3.4748	0.0086249	0.095899	FALSE	522.107	28.4993	4.1953	0.00029215	0.0078743	UP	72.4956	23.5391	1.6228	0.35365	0.73443	FALSE	179.895	4.55043	1.8771	5.305	1.28e-25	9.76e-25	UP	1025.69	4.1485	7.9498	1.81e-43	3.29e-42	UP	15.1715	4.13015		0.051684	0.087025	FALSE
PGSC0003DMG400022492	Gibberellin receptor GID1 [Source:PGSC_GENE%3BAcc:PGSC0003DMG400022492]	0.0242228	0.73957	1.56645	3.30819	0.461707	1.37105	1.66592	3.57467	97.7845	32.6342	1.5832	0.31481	0.68927	FALSE	216.312	33.4557	2.6928	0.029088	0.18643	FALSE	70.4844	27.6329	1.3509	0.45929	0.81741	FALSE	97.9267	2.04182	4.491	5.5838	3.63e-20	2.16e-19	UP	197.716	1.8567	6.7345	3.37e-43	6.05e-42	UP	41.7347	1.85594		1.13e-08	3.85e-08	UP
PGSC0003DMG401020115	Fimbrin [Source:PGSC_GENE%3BAcc:PGSC0003DMG401020115]	0.0259788	0.0166641	0.122816	2.23534	0.131988	0.0591423	0.127648	1.47813	11.6541	14.5041	-0.31563	0.75705	0.97773	FALSE	139.372	14.8692	3.2285	0.022512	0.15948	FALSE	4.73125	12.2813	-1.3762	0.36801	0.74862	FALSE	11.9295	3.40445	-1.0791	1.809	0.12996	0.19495	FALSE	207.676	3.09513	6.0682	1.35e-42	2.37e-41	UP	1.46293	3.09075		0.70163	0.82836	FALSE
PGSC0003DMG400016114	Sinapyl alcohol dehydrogenase 2 [Source:PGSC_GENE%3BAcc:PGSC0003DMG400016114]	0.0116003	0.253379	0.833937	3.69105	0.017472	7.33002	4.94872	5.58953	286.604	1.20868	7.8895	2.94e-05	0.0020271	UP	330.89	1.2391	8.0609	2.61e-06	0.00025184	UP	365.82	1.02344	8.4816	8.6e-06	0.00077779	UP	51.0414	0.956571	4.0142	5.7377	1.25e-11	4.79e-11	UP	215.879	0.866736	7.9604	1.9e-42	3.31e-41	UP	14.0032	0.866634		0.11276	0.17626	FALSE
PGSC0003DMG400010521	Conserved gene of unknown function [Source:PGSC_GENE%3BAcc:PGSC0003DMG400010521]	0.0619513	0.114848	0.877568	8.66884	0.268972	0.235887	1.54665	6.35855	91.8052	19.3388	2.2471	0.17718	0.52423	FALSE	390.807	19.8256	4.301	0.00046662	0.01112	UP	12.2003	16.375	-0.42458	0.6955	0.94669	FALSE	55.8365	5.31185	0.45344	3.3939	0.00068553	0.0014528	UP	527.459	4.82946	6.7711	1.03e-41	1.76e-40	UP	6.59522	4.8165		0.68449	0.81252	FALSE
PGSC0003DMG400027666	Conserved gene of unknown function [Source:PGSC_GENE%3BAcc:PGSC0003DMG400027666]	0.00761622	0	0.035538	5.28094	0	0	0.157311	5.20144	4.87908	0	Inf	0.50372	0.8286	FALSE	166.713	0	Inf	4.2e-05	0.0018799	UP	0	0	NA	NA	NA	NA	1.1723	0.33959	#NAME?	1.7875	0.83078	0.92701	FALSE	166.91	0.30914	9.0766	4.7e-41	7.83e-40	UP	0	0.310563		0.97327	1	FALSE
PGSC0003DMG400031791	Pectinesterase [Source:PGSC_GENE%3BAcc:PGSC0003DMG400031791]	0.0890103	2.04544	1.3386	11.6543	0.0186497	4.72756	6.03484	6.0683	653.865	2.41735	8.0794	2.83e-07	8.31e-05	UP	672.391	2.4782	8.0839	4.12e-08	1.22e-05	UP	445.802	2.04688	7.7668	7.54e-06	0.00070923	UP	153.47	13.758	4.0819	3.4796	1.34e-15	6.37e-15	UP	1277.64	12.502	6.6752	6.95e-41	1.15e-39	UP	211.697	12.5007		2.38e-32	2.65e-31	UP
PGSC0003DMG400023396	Leucine-rich repeat receptor protein kinase EXS [Source:PGSC_GENE%3BAcc:PGSC0003DMG400023396]	0.00182032	0.00176706	0.111644	1.39348	0	0.00207354	0.0472941	0.754112	8.76478	0	Inf	0.29154	0.66443	FALSE	141.987	0	Inf	9.7e-05	0.0034651	UP	0.340624	0	Inf	1	1	FALSE	21.7724	0.478286	-0.48281	5.5085	2.03e-05	4.99e-05	UP	259.528	0.433368	9.2261	1.36e-40	2.23e-39	UP	0.310073	0.433317		1	1	FALSE
PGSC0003DMG400030307	Male sterility MS5 [Source:PGSC_GENE%3BAcc:PGSC0003DMG400030307]	0.0115543	0	0.0135676	1.46977	0.00818326	0	0.0166329	0.998481	2.07299	1.20868	0.77829	1	1	FALSE	126.366	1.2391	6.6722	0.00062605	0.013785	UP	0	1.02344	#NAME?	0.47952	0.81741	FALSE	1.77185	2.03607	#NAME?	-0.20053	1	1	FALSE	183.549	1.85757	6.6266	2.81e-40	4.52e-39	UP	0	1.84842		0.38001	0.5072	FALSE
PGSC0003DMG400021204	LOB domain-containing protein 4 [Source:PGSC_GENE%3BAcc:PGSC0003DMG400021204]	0.0342425	0.132166	0.642879	4.52404	0	0.652273	1.12085	2.05409	43.7957	0	Inf	0.020566	0.16622	FALSE	82.2845	0	Inf	0.0011958	0.021726	UP	22.0238	0	Inf	0.065527	0.31926	FALSE	26.6734	1.91314	1.5088	3.8014	0.00072504	0.0015327	UP	179.311	1.73347	6.6927	2.86e-40	4.59e-39	UP	4.93255	1.73327		0.54505	0.67992	FALSE
PGSC0003DMG400012143	ATP binding protein [Source:PGSC_GENE%3BAcc:PGSC0003DMG400012143]	0.0190053	0.94578	1.23811	2.70888	0	3.72829	4.05783	2.62475	273.104	0	Inf	9.78e-06	0.00096712	UP	181.204	0	Inf	2.62e-05	0.0013583	UP	217.84	0	Inf	4.31e-05	0.0025138	UP	88.4577	1.8309	5.1925	5.5944	2.13e-16	1.06e-15	UP	184.891	1.67079	6.79	3.17e-40	5.08e-39	UP	60.9947	1.66805		3.55e-13	1.61e-12	UP
PGSC0003DMG400015647	Conserved gene of unknown function [Source:PGSC_GENE%3BAcc:PGSC0003DMG400015647]	0.0700186	0.494984	10.2595	5.92256	0.154844	0.623195	7.74918	4.47721	252.84	6.04338	5.3867	0.00065405	0.016678	UP	149.063	6.1955	4.5886	0.0029503	0.040595	UP	17.4951	5.1172	1.7735	0.50506	0.83579	FALSE	354.266	3.26001	2.3821	6.7638	7.96e-40	1.06e-38	UP	195.478	2.97176	6.0395	3.48e-40	5.56e-39	UP	15.433	2.96048		0.019353	0.035355	UP
PGSC0003DMG400000414	Shugoshin-1 [Source:PGSC_GENE%3BAcc:PGSC0003DMG400000414]	0.00700805	0.00615019	0.00639045	3.80828	1.45664	0.188535	0.0388717	2.85544	1.88817	83.3986	-5.465	0.00033674	0.010777	DOWN	140.075	85.4979	0.71224	0.59284	0.8928	FALSE	7.73969	70.6174	-3.1897	0.01904	0.15492	FALSE	0.324377	0.478286	-0.62256	-0.5602	1	1	FALSE	184.277	0.433368	8.7321	4.86e-40	7.74e-39	UP	0.281446	0.433317		1	1	FALSE
PGSC0003DMG400013571	Microtubule-associated protein TORTIFOLIA1 [Source:PGSC_GENE%3BAcc:PGSC0003DMG400013571]	0.0233373	0.0144317	0.131264	2.72309	0.0566137	0.0582153	0.383576	1.55321	54.4964	9.6694	2.4947	0.20671	0.5651	FALSE	227.14	9.9128	4.5181	0.0011686	0.021338	UP	7.05652	8.18752	-0.21447	0.85025	1	FALSE	19.824	4.75425	-1.142	2.06	0.066774	0.10663	FALSE	393.028	4.32796	6.5048	7.7e-40	1.22e-38	UP	1.97012	4.34788		0.6354	0.76623	FALSE
Novel01018	PREDICTED: phragmoplast orienting kinesin 2-like [Solanum tuberosum]	0.0331061	0.172879	0.285358	7.72941	0.0235233	0.183889	0.392647	5.55458	16.9222	1.20868	3.8074	0.24426	0.60904	FALSE	244.258	1.2391	7.623	1.76e-05	0.0010157	UP	6.77666	1.02344	2.7271	0.56136	0.87252	FALSE	12.9518	2.03032	1.9458	2.6734	0.079491	0.12506	FALSE	335.559	1.85843	7.4963	8.33e-40	1.32e-38	UP	7.092	1.8409		0.20266	0.29606	FALSE
PGSC0003DMG400008093	LysM type receptor kinase [Source:PGSC_GENE%3BAcc:PGSC0003DMG400008093]	0.00625221	0.0724524	1.87121	1.96344	0.010192	0.0160168	1.00105	0.369571	98.9187	1.20868	6.3547	0.0045697	0.063319	FALSE	37.3294	1.2391	4.9129	0.039122	0.22286	FALSE	1.38859	1.02344	0.44019	1	1	FALSE	196.315	0.884351	3.0987	7.7943	4.73e-44	7.24e-43	UP	196.744	0.805055	7.933	1.13e-39	1.77e-38	UP	6.8661	0.801497		0.12699	0.1959	FALSE
PGSC0003DMG400037454	Centromere protein [Source:PGSC_GENE%3BAcc:PGSC0003DMG400037454]	0.00656864	0.0191414	0.336525	1.18994	0	0.0296613	0.478282	0.980724	69.0402	0	Inf	0.0057774	0.074162	FALSE	145.612	0	Inf	8.71e-05	0.0032304	UP	3.6776	0	Inf	0.55785	0.87146	FALSE	51.6222	1.35836	1.0917	5.2481	2.13e-09	7.1e-09	UP	174.408	1.23656	7.14	3e-39	4.63e-38	UP	2.64753	1.24225		0.7812	0.89826	FALSE
PGSC0003DMG400020178	Serine-threonine protein kinase%2C plant-type [Source:PGSC_GENE%3BAcc:PGSC0003DMG400020178]	0.0195996	0.0101889	0.0610692	2.03317	0.157633	0.0287485	0.124298	1.46679	11.0026	16.9215	-0.62101	0.61664	0.90919	FALSE	134.782	17.3474	2.9578	0.034376	0.20703	FALSE	2.26861	14.3282	-2.659	0.13677	0.46735	FALSE	5.79297	2.51008	-1.3908	1.2066	0.5129	0.64091	FALSE	184.666	2.28907	6.334	1.08e-38	1.63e-37	UP	0.872966	2.28917		0.61302	0.74853	FALSE
Novel00602	PREDICTED: Fanconi anemia group D2 protein homolog [Solanum tuberosum]	0.0172041	0.0294097	0.723575	1.52023	0.0084942	0.0571493	0.616186	0.902609	72.8536	1.20868	5.9135	0.01254	0.12161	FALSE	109.84	1.2391	6.47	0.0012056	0.021862	UP	5.86127	1.02344	2.5178	0.59651	0.89322	FALSE	91.068	2.92042	0.33256	4.9627	1.88e-17	9.92e-17	UP	182.868	2.66262	6.1018	1.89e-38	2.81e-37	UP	3.3369	2.64992		0.91268	0.99599	FALSE
PGSC0003DMG400008001	D-type cyclin family 3 subgroup 3 [Source:PGSC_GENE%3BAcc:PGSC0003DMG400008001]	0.0491305	0.0852187	1.57333	4.31675	0.13026	0.526683	3.18065	2.05834	171.52	8.46073	4.3415	0.0069279	0.083594	FALSE	113.981	8.6737	3.716	0.015675	0.12662	FALSE	24.6302	7.16408	1.7816	0.45146	0.8147	FALSE	90.4024	3.80624	0.35028	4.5699	1.02e-15	4.87e-15	UP	236.933	3.46495	6.0955	2.08e-37	2.95e-36	UP	4.41897	3.46637		0.9148	0.99741	FALSE
PGSC0003DMG400033006	Inosine-uridine preferring nucleoside hydrolase [Source:PGSC_GENE%3BAcc:PGSC0003DMG400033006]	0.0845159	4.54296	14.3085	13.7665	0.465141	12.7555	21.7806	18.4835	658.939	16.9215	5.2832	4.11e-05	0.0025631	UP	574.424	17.3474	5.0493	2.97e-05	0.001491	UP	336.101	14.3282	4.552	0.0017417	0.033947	UP	460.547	3.66754	5.3028	6.9724	8.76e-34	9.35e-33	UP	423.282	3.34072	6.9853	2.08e-37	2.95e-36	UP	131.984	3.34362		2.42e-15	1.24e-14	UP
PGSC0003DMG400014281	Leucine-rich repeat receptor protein kinase exs [Source:PGSC_GENE%3BAcc:PGSC0003DMG400014281]	0.00733561	0.029844	0.384779	0.954352	0.0220974	0.0908863	2.228	2.04444	505.248	6.04338	6.3855	1.28e-05	0.0011564	UP	477.761	6.1955	6.2689	4.4e-06	0.00037431	UP	18.2599	5.1172	1.8353	0.50749	0.83764	FALSE	93.0426	2.39143	1.5885	5.2819	2.58e-19	1.48e-18	UP	220.987	2.16684	6.6722	2.31e-37	3.26e-36	UP	6.51557	2.16658		0.24069	0.34419	FALSE
PGSC0003DMG402026117	Parallel spindle 1 [Source:PGSC_GENE%3BAcc:PGSC0003DMG402026117]	0.00274212	0.00894953	0.0210155	1.42963	0	0.0287924	0.0197623	1.46124	2.05093	0	Inf	0.84316	1	FALSE	155.205	0	Inf	6.29e-05	0.0025813	UP	2.54566	0	Inf	0.69092	0.94467	FALSE	2.30609	0.406065	1.2677	2.5057	0.55416	0.68255	FALSE	149.916	0.371687	8.6559	3.04e-37	4.28e-36	UP	0.8865	0.36818		0.93006	1	FALSE
PGSC0003DMG400008629	Conserved gene of unknown function [Source:PGSC_GENE%3BAcc:PGSC0003DMG400008629]	0.101383	0.298454	8.49823	11.1646	1.65429	1.37209	15.8179	13.2608	759.958	95.4854	2.9926	0.0059175	0.075394	FALSE	654.888	97.8889	2.742	0.0069576	0.073798	FALSE	57.6747	80.8518	-0.48734	0.59301	0.89091	FALSE	433.83	6.98254	1.1163	5.9572	5.1e-74	1.86e-72	UP	544.653	6.37676	6.4164	4.51e-36	6.06e-35	UP	13.7594	6.34667		0.24984	0.35526	FALSE
PGSC0003DMG400006237	Gamma-gliadin [Source:PGSC_GENE%3BAcc:PGSC0003DMG400006237]	0.0422419	0.699187	7.06261	4.47449	0.0837617	5.91307	7.66262	19.7037	277.596	3.62603	6.2585	0.00016619	0.0065611	UP	730.587	3.7173	7.6187	6.03e-08	1.65e-05	UP	187.739	3.07032	5.9342	0.0010878	0.024995	UP	270.14	2.18051	3.6119	6.9529	6.53e-06	1.68e-05	UP	163.724	1.98093	6.3689	4.64e-36	6.22e-35	UP	24.1922	1.97869		0.010492	0.019933	UP
PGSC0003DMG400002700	F-box family protein [Source:PGSC_GENE%3BAcc:PGSC0003DMG400002700]	0.0134428	0.229506	1.76015	1.95684	0.18031	0.483079	2.30275	1.40391	243.707	22.9648	3.4077	0.013823	0.12963	FALSE	152.811	23.5429	2.6984	0.042694	0.2366	FALSE	44.4594	19.4454	1.1931	0.55705	0.87146	FALSE	198.387	2.04182	3.652	6.6023	2.41e-15	1.14e-14	UP	210.587	1.8567	6.8255	4.52e-35	5.81e-34	UP	23.3306	1.85594		0.00015732	0.00037216	UP
PGSC0003DMG400033944	Gene of unknown function [Source:PGSC_GENE%3BAcc:PGSC0003DMG400033944]	0.0336927	0.0593051	1.28341	4.9089	0.358413	0.469394	2.38067	7.10102	73.6994	13.2954	2.4707	0.16916	0.51809	FALSE	226.161	13.6301	4.0525	0.0026214	0.037587	UP	12.3905	11.2578	0.1383	1	1	FALSE	42.1086	1.49131	0.37292	4.8195	1.83e-08	5.74e-08	UP	154.094	1.36165	6.8223	7.4e-35	9.4e-34	UP	1.75791	1.35749		1	1	FALSE
PGSC0003DMG400023891	Conserved gene of unknown function [Source:PGSC_GENE%3BAcc:PGSC0003DMG400023891]	0.00565563	0.00612971	0.0245482	6.05107	0	0.0218522	0	5.43773	0	0	NA	NA	NA	NA	280.53	0	Inf	1.8e-06	0.00018851	UP	0.963992	0	Inf	1	1	FALSE	1.30576	0.406065	-0.31979	1.6851	0.80331	0.9042	FALSE	307.531	0.371687	9.6924	8.44e-35	1.07e-33	UP	0.29498	0.36818		1	1	FALSE
PGSC0003DMG400038913	YUP8H12R.21 protein [Source:PGSC_GENE%3BAcc:PGSC0003DMG400038913]	0.0338924	0.407298	1.49429	3.54503	0.255727	5.33964	5.61486	16.7732	243.124	13.2954	4.1927	0.0042956	0.060728	FALSE	747.655	13.6301	5.7775	2.39e-06	0.00023512	UP	202.209	11.2578	4.1668	0.0080149	0.090444	FALSE	68.6647	2.10255	3.1486	5.0294	5.95e-06	1.54e-05	UP	156.094	1.92012	6.3451	2.36e-34	2.93e-33	UP	16.9023	1.90604		0.0032006	0.0065277	UP
PGSC0003DMG402019255	Pectinesterase [Source:PGSC_GENE%3BAcc:PGSC0003DMG402019255]	0.8514	0.966321	22.8523	113.752	4.89655	1.72018	55.6926	146.721	4641.71	489.514	3.2452	0.0039603	0.057741	FALSE	12575.4	501.836	4.6472	0.0010908	0.020314	UP	125.122	414.493	-1.728	0.055905	0.29195	FALSE	2021.41	101.531	-0.2562	4.3154	9.64e-14	4.16e-13	UP	9613.06	92.5042	6.6993	4.17e-34	5.15e-33	UP	77.1446	92.1361		0.72219	0.84798	FALSE
PGSC0003DMG400010208	DNA binding protein [Source:PGSC_GENE%3BAcc:PGSC0003DMG400010208]	0.0171276	0.178551	0.847652	2.22584	0.0452695	0.0853766	1.2519	1.83421	83.4963	3.62603	4.5253	0.023221	0.17835	FALSE	126.129	3.7173	5.0845	0.0025758	0.037123	UP	4.94211	3.07032	0.68674	1	1	FALSE	60.0593	1.63575	2.9408	5.1984	2.1e-12	8.41e-12	UP	150.774	1.48502	6.6658	4.4e-34	5.42e-33	UP	11.4235	1.48776		0.023528	0.042375	UP
PGSC0003DMG400016996	Nitrate transporter [Source:PGSC_GENE%3BAcc:PGSC0003DMG400016996]	0.0110671	0.470186	1.87913	2.35799	0.0714304	0.160317	1.18829	0.903409	115.177	8.46073	3.7669	0.027411	0.19609	FALSE	91.1896	8.6737	3.3942	0.032453	0.19982	FALSE	13.599	7.16408	0.92465	0.7814	0.98739	FALSE	196.846	1.56353	4.9662	6.9761	3.33e-42	4.81e-41	UP	235.966	1.42333	7.3732	4.68e-34	5.74e-33	UP	44.4708	1.42262		9.01e-10	3.32e-09	UP
PGSC0003DMG400008094	Carbonic anhydrase [Source:PGSC_GENE%3BAcc:PGSC0003DMG400008094]	0.0196021	0.648654	0.258338	2.8098	0.0984138	7.46067	0.563919	1.25922	29.024	6.04338	2.2638	0.33779	0.71165	FALSE	65.9079	6.1955	3.4112	0.049875	0.25841	FALSE	331.618	5.1172	6.018	0.00020021	0.0077507	UP	14.0441	1.43486	4.6128	3.291	0.01525	0.027148	UP	146.053	1.3001	6.8117	5.27e-34	6.45e-33	UP	31.8069	1.29995		8.67e-07	2.53e-06	UP
PGSC0003DMG400022279	Fasciclin-like arabinogalactan protein 10 [Source:PGSC_GENE%3BAcc:PGSC0003DMG400022279]	0.0592432	0.0575417	1.14893	8.52297	0.316321	0.311617	6.3819	4.14145	567.017	33.8429	4.0665	0.00087642	0.020496	UP	377.89	34.6948	3.4452	0.0029886	0.040986	UP	24.1012	28.6563	-0.24975	0.77842	0.98572	FALSE	108.692	7.55883	-0.4776	3.8459	6.94e-17	3.55e-16	UP	770.778	6.87294	6.8092	5.57e-33	6.54e-32	UP	4.92149	6.85281		0.85632	0.95792	FALSE
PGSC0003DMG400028601	Alpha-L-fucosidase 2 [Source:PGSC_GENE%3BAcc:PGSC0003DMG400028601]	0.0259256	0.151652	0.46128	2.23366	0.366912	1.31965	1.05083	2.63203	74.6046	31.4256	1.2473	0.47727	0.81311	FALSE	192.846	32.2166	2.5816	0.040595	0.22859	FALSE	81.3615	26.6094	1.6124	0.32958	0.71139	FALSE	34.9343	2.64877	2.1042	3.7212	6.98e-06	1.79e-05	UP	161.779	2.4133	6.0669	8.81e-33	1.03e-31	UP	10.3701	2.41193		0.10455	0.1647	FALSE
PGSC0003DMG400005426	Dirigent 1 [Source:PGSC_GENE%3BAcc:PGSC0003DMG400005426]	0.131206	0.751175	9.14517	13.7878	0.202891	0.809498	3.89062	5.19072	154.234	9.6694	3.9955	0.012933	0.12391	FALSE	211.339	9.9128	4.4141	0.0016302	0.027071	UP	28.0002	8.18752	1.7739	0.45129	0.8146	FALSE	385.561	7.46082	2.0763	5.6915	4.77e-65	1.36e-63	UP	555.135	6.81013	6.349	2.93e-32	3.35e-31	UP	28.592	6.77999		0.0039882	0.0080191	UP
PGSC0003DMG400026391	Conserved gene of unknown function [Source:PGSC_GENE%3BAcc:PGSC0003DMG400026391]	0.0155978	0.154841	2.39482	2.21815	0.131988	0.0592646	1.41284	1.35523	86.3992	9.6694	3.1595	0.076578	0.34144	FALSE	85.0878	9.9128	3.1016	0.05127	0.26268	FALSE	3.11211	8.18752	-1.3955	0.39605	0.77528	FALSE	155.184	1.36264	2.8741	6.8314	2.71e-34	2.94e-33	UP	137.323	1.23842	6.7929	3.24e-32	3.7e-31	UP	9.05327	1.23481		0.05693	0.094968	FALSE
PGSC0003DMG400029401	RING-H2 finger protein ATL80 [Source:PGSC_GENE%3BAcc:PGSC0003DMG400029401]	0.0237176	0.688809	3.94702	3.48466	0.578961	1.1782	5.53024	2.46778	221.602	27.7995	2.9948	0.029047	0.20184	FALSE	101.279	28.4993	1.8293	0.18829	0.5281	FALSE	40.9376	23.5391	0.79837	0.73468	0.96937	FALSE	167.665	1.35836	4.4101	6.9476	8.36e-36	9.62e-35	UP	141.602	1.23656	6.8394	4.13e-32	4.71e-31	UP	26.4113	1.24225		1.48e-05	3.89e-05	UP
PGSC0003DMG400044242	Leucine-rich repeat family protein [Source:PGSC_GENE%3BAcc:PGSC0003DMG400044242]	0.00450035	0.00436869	0.0119202	1.68691	0	0.00552576	0.0214606	0.749305	1.61043	0	Inf	0.96743	1	FALSE	57.1786	0	Inf	0.0045366	0.055861	FALSE	0.35367	0	Inf	1	1	FALSE	0.937843	0.478286	-0.48281	0.97147	0.89534	0.98212	FALSE	127.294	0.433368	8.1984	4.44e-32	5.05e-31	UP	0.310073	0.433317		1	1	FALSE
PGSC0003DMG400015548	Peroxidase 15 [Source:PGSC_GENE%3BAcc:PGSC0003DMG400015548]	0.021096	0.513579	2.06493	4.27168	0.224505	1.52328	17.2794	4.82675	1085.31	16.9215	6.0031	1.97e-06	0.00030907	UP	309.435	17.3474	4.1568	0.0010112	0.019292	UP	82.5483	14.3282	2.5264	0.14582	0.4817	FALSE	137.654	1.89737	4.1631	6.1809	5.55e-28	4.67e-27	UP	272.054	1.73334	7.2942	1.8e-31	1.99e-30	UP	30.9158	1.72567		0.00043621	0.00098567	UP
PGSC0003DMG400022208	Endo-1%2C4-beta-glucanase [Source:PGSC_GENE%3BAcc:PGSC0003DMG400022208]	0.0293681	0.625185	2.09971	3.67155	0.164091	9.97731	2.64296	1.34999	227.068	16.9215	3.7462	0.0090635	0.099623	FALSE	118.829	17.3474	2.7761	0.05066	0.26059	FALSE	742.521	14.3282	5.6955	3.32e-05	0.0020584	UP	191.518	3.61109	3.9699	5.7289	7.3e-37	8.74e-36	UP	320.006	3.27917	6.6086	1.9e-31	2.1e-30	UP	51.4903	3.28608		2.54e-09	9.05e-09	UP
PGSC0003DMG400028406	Zinc finger protein [Source:PGSC_GENE%3BAcc:PGSC0003DMG400028406]	0.0125202	0.347623	1.20614	1.88176	0	0.361249	0.982996	1.74037	66.8384	0	Inf	0.0063726	0.079083	FALSE	121.782	0	Inf	0.00021094	0.006136	UP	21.4725	0	Inf	0.065739	0.32002	FALSE	87.442	1.22394	4.3548	6.1587	2.83e-19	1.62e-18	UP	130.485	1.11419	6.8717	1.35e-30	1.44e-29	UP	22.7539	1.11206		3.89e-05	9.78e-05	UP
PGSC0003DMG400018446	Cinnamyl alcohol dehydrogenase [Source:PGSC_GENE%3BAcc:PGSC0003DMG400018446]	0.0266384	0.0447885	0.530359	4.35483	0.0668699	0.0189754	0.691732	3.14668	51.8694	6.04338	3.1015	0.13704	0.46662	FALSE	243.34	6.1955	5.2956	0.00028091	0.0076434	UP	1.24674	5.1172	-2.0372	0.35069	0.73143	FALSE	42.3875	2.86971	0.31503	3.8847	6.3e-05	0.00014822	UP	333.352	2.60021	7.0023	1.37e-30	1.47e-29	UP	3.23437	2.5999		0.8152	0.92095	FALSE
PGSC0003DMG401024842	Conserved gene of unknown function [Source:PGSC_GENE%3BAcc:PGSC0003DMG401024842]	0.27264	13.5249	9.62986	25.8902	0.0544451	4.30603	1.41479	19.1219	52.2444	2.41735	4.4338	0.052755	0.2799	FALSE	727.903	2.4782	8.1983	2.38e-08	8.29e-06	UP	137.877	2.04688	6.0738	0.0020996	0.038419	UP	378.203	14.4357	5.1929	4.7114	8.4e-56	1.82e-54	UP	970.993	13.123	6.2093	3e-30	3.16e-29	UP	479.425	13.1069		4.32e-55	1.07e-53	UP
PGSC0003DMG402016309	Non-specific lipid-transfer protein [Source:PGSC_GENE%3BAcc:PGSC0003DMG402016309]	0.123237	0.709686	14.0409	17.2117	0.74784	18.9499	59.9069	83.7785	2350.91	35.0516	6.0676	1.21e-06	0.00021537	UP	3368.65	35.9339	6.5507	1.83e-07	3.55e-05	UP	649.357	29.6798	4.4515	0.00059875	0.016753	UP	581.593	6.88687	2.0873	6.4	1.25e-07	3.68e-07	UP	681.471	6.25107	6.7684	4.97e-30	5.18e-29	UP	26.5765	6.25416		0.045187	0.077069	FALSE
PGSC0003DMG400020336	Conserved gene of unknown function [Source:PGSC_GENE%3BAcc:PGSC0003DMG400020336]	0.00327753	0.058951	2.85004	1.13039	0.0394922	0.0530879	1.27749	0.758393	130.544	4.8347	4.755	0.0076843	0.089232	FALSE	79.3838	4.9564	4.0015	0.021616	0.15547	FALSE	4.73125	4.09376	0.2088	1	1	FALSE	308.648	0.478286	3.7344	9.3339	4.73e-68	1.49e-66	UP	116.995	0.433368	8.0766	1.18e-29	1.21e-28	UP	5.76738	0.433317		0.077121	0.1251	FALSE
PGSC0003DMG400027509	Protein ZINC INDUCED FACILITATOR-LIKE 1 [Source:PGSC_GENE%3BAcc:PGSC0003DMG400027509]	0.0345262	0.24719	0.712797	3.04972	0.0928819	2.39168	0.714583	0.810017	54.4167	8.46073	2.6852	0.17943	0.52569	FALSE	62.9227	8.6737	2.8589	0.090906	0.36054	FALSE	157.743	7.16408	4.4607	0.0079063	0.08964	FALSE	57.4572	3.74979	2.4	3.9376	2.32e-05	5.68e-05	UP	234.699	3.4034	6.1077	1.52e-29	1.56e-28	UP	17.9915	3.40884		0.0096328	0.018425	UP
PGSC0003DMG400019274	Indole-3-acetic acid-amido synthetase GH3.6 [Source:PGSC_GENE%3BAcc:PGSC0003DMG400019274]	0.0848442	1.95732	11.1028	9.11282	0.678341	32.5304	27.389	30.2918	3253.91	96.694	5.0726	2.37e-05	0.0017583	UP	3692.59	99.128	5.2192	9.04e-06	0.00061954	UP	3382.17	81.8752	5.3684	3.05e-05	0.0019444	UP	1398.85	14.4242	4.0891	6.5996	2.14e-10	7.59e-10	UP	1097.16	13.1247	6.3853	2.87e-29	2.9e-28	UP	222.811	13.0918		3.92e-34	4.66e-33	UP
PGSC0003DMG400023523	Histone H4 [Source:PGSC_GENE%3BAcc:PGSC0003DMG400023523]	0.29598	0.401659	33.5922	28.0165	0.159981	0.655008	31.6396	17.446	796.939	4.8347	7.3649	3.18e-07	8.82e-05	UP	450.852	4.9564	6.5072	3.56e-06	0.00031692	UP	14.315	4.09376	1.806	0.54998	0.86697	FALSE	898.061	10.6688	-0.0045437	6.3953	1.1e-112	9.64e-111	UP	715.312	9.71215	6.2026	3.73e-29	3.76e-28	UP	9.69722	9.72781		0.97379	1	FALSE
Novel02796	hypothetical protein VITISV_012031 [Vitis vinifera]	0.00798125	0.0560502	0.420805	2.42914	0.0588724	0.289433	0.70465	1.98419	95.4558	9.6694	3.3033	0.058947	0.29833	FALSE	278.915	9.9128	4.8144	0.000405	0.010065	UP	34.597	8.18752	2.0791	0.3335	0.71582	FALSE	61.0705	1.56353	2.3702	5.2876	0.00046063	0.00099272	UP	337.1	1.42333	7.8878	6.03e-29	6.03e-28	UP	7.35523	1.42262		0.13918	0.21255	FALSE
PGSC0003DMG400019437	Pathogen-and wound-inducible antifungal protein CBP20 [Source:PGSC_GENE%3BAcc:PGSC0003DMG400019437]	0.658348	4.38331	11.273	111.086	3.69591	2.44009	14.7754	114.715	545.78	163.171	1.7419	0.10196	0.40029	FALSE	4330.14	167.279	4.6941	5.34e-05	0.0022549	UP	77.9363	138.164	-0.82602	0.40069	0.77948	FALSE	440.282	34.6692	2.2951	3.6667	2.3e-44	3.57e-43	UP	4142.15	31.5727	7.0356	8.58e-29	8.53e-28	UP	154.52	31.4834		0.0054524	0.010786	UP
PGSC0003DMG400006595	Conserved gene of unknown function [Source:PGSC_GENE%3BAcc:PGSC0003DMG400006595]	0.00622894	0.0799472	1.63377	2.08139	0	0.0687674	1.2179	1.58869	65.3167	0	Inf	0.0068942	0.083395	FALSE	87.4429	0	Inf	0.00096177	0.01868	UP	3.16903	0	Inf	0.60094	0.89615	FALSE	93.0795	0.478286	3.2458	7.6044	1.49e-22	9.93e-22	UP	113.318	0.433368	8.0306	2.13e-28	2.08e-27	UP	4.11045	0.433317		0.19247	0.2833	FALSE
PGSC0003DMG402011802	Subtilase family protein [Source:PGSC_GENE%3BAcc:PGSC0003DMG402011802]	0.0139649	0.068057	0.145494	1.66632	0.335193	0.383683	0.319623	1.87344	32.4251	41.095	-0.34185	0.70624	0.95216	FALSE	196.459	42.1294	2.2213	0.0696	0.31177	FALSE	33.9817	34.797	-0.034205	0.87984	1	FALSE	15.7701	2.04182	1.845	2.9493	0.0085314	0.015743	UP	173.054	1.8567	6.5423	2.32e-28	2.26e-27	UP	6.66742	1.85594		0.22928	0.32956	FALSE
PGSC0003DMG400018793	One-helix protein [Source:PGSC_GENE%3BAcc:PGSC0003DMG400018793]	0.0343774	0.955721	4.44138	2.94803	0	0.66145	2.18698	1.81746	93.1349	0	Inf	0.0019698	0.035342	UP	79.9908	0	Inf	0.001363	0.02358	UP	24.5201	0	Inf	0.051425	0.27899	FALSE	201.994	2.10829	4.3591	6.5821	3.46e-42	4.98e-41	UP	128.335	1.91925	6.0632	2.7e-28	2.63e-27	UP	39.2698	1.91356		0.0063549	0.012473	UP
PGSC0003DMG400018014	Anthocyanin acyltransferase [Source:PGSC_GENE%3BAcc:PGSC0003DMG400018014]	0.096142	0.291224	15.9397	47.9735	0	0	0	0	0	0	NA	NA	NA	NA	0	0	NA	NA	NA	NA	0	0	NA	NA	NA	NA	1223.18	9.95026	1.162	6.9417	1.1e-17	5.89e-17	UP	3527.19	9.03978	8.608	2.78e-28	2.71e-27	UP	20.1818	9.01939		0.091489	0.14616	FALSE
Novel01609	--	0.00789702	0.0499017	0.0366049	2.55824	0.0237885	0.0175767	0.0143507	1.63496	0.617583	1.20868	-0.96872	0.83984	1	FALSE	71.1814	1.2391	5.8441	0.0062808	0.069494	FALSE	0.636415	1.02344	-0.68539	0.92633	1	FALSE	1.64122	0.478286	2.225	1.7788	0.66252	0.78365	FALSE	110.046	0.433368	7.9883	5.23e-28	5.03e-27	UP	2.02582	0.433317		0.54483	0.67973	FALSE
PGSC0003DMG400008381	Arabinogalactan peptide 14 [Source:PGSC_GENE%3BAcc:PGSC0003DMG400008381]	0.0167502	0.0762718	0.0554584	5.3384	0.353201	0.317333	0.0144236	4.14859	0.291082	8.46073	-4.8613	0.064885	0.31347	FALSE	84.9943	8.6737	3.2926	0.040937	0.22969	FALSE	5.43194	7.16408	-0.39931	0.74234	0.97244	FALSE	1.1723	0.478286	1.7538	1.2934	0.81142	0.91097	FALSE	108.043	0.433368	7.9618	1.14e-27	1.08e-26	UP	1.46137	0.433317		0.71346	0.83921	FALSE
PGSC0003DMG400000313	Ovate [Source:PGSC_GENE%3BAcc:PGSC0003DMG400000313]	0.0265857	0	0.0449183	4.32628	0.0200213	0.00663241	0.149152	3.5428	7.4239	1.20868	2.6188	0.57025	0.87771	FALSE	183.514	1.2391	7.2104	9.36e-05	0.0033741	UP	0.282744	1.02344	-1.8559	0.7727	0.98313	FALSE	2.39883	1.91314	#NAME?	0.32639	0.86802	0.95895	FALSE	220.603	1.73347	6.9916	1.56e-27	1.47e-26	UP	0	1.73327		0.45873	0.5922	FALSE
PGSC0003DMG400002825	RNase NE [Source:PGSC_GENE%3BAcc:PGSC0003DMG400002825]	0.0439882	0	0.437692	19.5926	0.0520925	1.40394	16.3581	29.3441	316.836	1.20868	8.0342	1.56e-05	0.001316	UP	583.142	1.2391	8.8784	3.88e-08	1.18e-05	UP	23.574	1.02344	4.5257	0.1247	0.44817	FALSE	8.97968	1.21819	#NAME?	2.8819	0.063771	0.10225	FALSE	383.898	1.11506	8.4275	2.03e-27	1.9e-26	UP	0	1.10454		0.62416	0.75758	FALSE
PGSC0003DMG400028830	Myb-like DNA-binding domain%2C SHAQKYF class family protein [Source:PGSC_GENE%3BAcc:PGSC0003DMG400028830]	0.0202272	1.31844	3.37647	3.33078	0	1.2289	3.49919	3.89765	116.069	0	Inf	0.00080402	0.019437	UP	132.387	0	Inf	0.00014159	0.0045237	UP	35.2284	0	Inf	0.02483	0.18262	FALSE	118.539	0.956571	5.5909	6.9533	9.67e-16	4.63e-15	UP	111.762	0.866736	7.0106	2.38e-27	2.22e-26	UP	41.7691	0.866634		2.52e-10	9.64e-10	UP
PGSC0003DMG401030517	Origin recognition complex 4 subunit [Source:PGSC_GENE%3BAcc:PGSC0003DMG401030517]	0.0161571	0.728031	3.42758	1.43043	0.0734357	2.29973	3.19948	1.36326	263.029	7.25205	5.1807	0.00078355	0.019049	UP	114.898	7.4346	3.95	0.011494	0.10383	FALSE	165.04	6.14064	4.7483	0.0055576	0.071883	FALSE	299.473	1.90312	5.0495	7.2979	5.41e-44	8.26e-43	UP	119.528	1.73247	6.1084	2.38e-26	2.12e-25	UP	57.3983	1.73319		2.6e-12	1.12e-11	UP
PGSC0003DMG400023324	Aspartic proteinase nepenthesin-1 [Source:PGSC_GENE%3BAcc:PGSC0003DMG400023324]	0.0128529	0.0646603	0.752672	1.80655	0.329715	0.18319	3.55525	12.4167	315.207	35.0516	3.1687	0.014615	0.13425	FALSE	1132.93	35.9339	4.9786	8.47e-06	0.0005955	UP	14.334	29.6798	-1.05	0.38609	0.76578	FALSE	70.6673	1.63001	1.888	5.4381	0.010862	0.019758	UP	162.304	1.48588	6.7712	1.04e-25	9.01e-25	UP	5.47879	1.48024		0.30058	0.41688	FALSE
PGSC0003DMG400021286	Triacylglycerol lipase [Source:PGSC_GENE%3BAcc:PGSC0003DMG400021286]	0.0148227	0	0.044803	1.33416	0	0.00949314	0.00728835	0.928667	0.617583	0	Inf	1	1	FALSE	79.714	0	Inf	0.0013823	0.023829	UP	0.694294	0	Inf	1	1	FALSE	3.96366	1.7687	#NAME?	1.1641	0.54371	0.67179	FALSE	112.911	1.61011	6.1319	1.06e-25	9.23e-25	UP	0	1.60299		0.47161	0.60586	FALSE
PGSC0003DMG400039347	Reticuline oxidase [Source:PGSC_GENE%3BAcc:PGSC0003DMG400039347]	0.00340811	0.00957235	0.445552	1.28233	0.0615984	0.0286877	0.275068	0.140171	27.0613	7.25205	1.8998	0.44175	0.78386	FALSE	14.2158	7.4346	0.93516	0.78582	0.99378	FALSE	2.4496	6.14064	-1.3258	0.43993	0.80665	FALSE	46.4148	0.478286	1.0546	6.6006	2.48e-11	9.35e-11	UP	127.921	0.433368	8.2054	1.54e-25	1.33e-24	UP	0.900034	0.433317		0.92454	1	FALSE
PGSC0003DMG400011051	Conserved gene of unknown function [Source:PGSC_GENE%3BAcc:PGSC0003DMG400011051]	0.00694722	0.00638433	0.0284335	1.99124	0.0209274	0.204184	0.372955	2.23257	18.048	1.20868	3.9003	0.22595	0.58844	FALSE	110.393	1.2391	6.4772	0.0011565	0.021198	UP	8.60027	1.02344	3.071	0.44537	0.80937	FALSE	1.45031	0.478286	-0.5548	1.6004	0.7279	0.84436	FALSE	97.1891	0.433368	7.8091	4.82e-25	4.06e-24	UP	0.29498	0.433317		1	1	FALSE
PGSC0003DMG400030006	PAR-1b protein [Source:PGSC_GENE%3BAcc:PGSC0003DMG400030006]	1.15399	13.7197	58.9394	139.135	0.555478	4.34887	16.2463	26.6166	382.745	15.7128	4.6064	0.00071025	0.017643	UP	642.825	16.1083	5.3185	1.08e-05	0.00069286	UP	89.1411	13.3047	2.7442	0.11385	0.42793	FALSE	1474.88	38.9289	3.13	5.2436	3.82e-77	1.52e-75	UP	3323.54	35.3997	6.5528	7.75e-25	6.48e-24	UP	309.849	35.393		8.61e-29	8.21e-28	UP
PGSC0003DMG400014600	Lyase [Source:PGSC_GENE%3BAcc:PGSC0003DMG400014600]	0.0608111	1.33247	7.22804	7.99853	0.191449	6.46619	11.2221	19.0479	1297.79	26.5909	5.609	4.23e-06	0.00054286	UP	2265.88	27.2602	6.3771	1.4e-07	2.99e-05	UP	655.375	22.5157	4.8633	0.00024307	0.008884	UP	887.363	10.0732	4.0161	6.4609	7.26e-11	2.65e-10	UP	938.399	9.16388	6.6781	1.92e-24	1.58e-23	UP	147.796	9.13454		4.22e-24	3.27e-23	UP
PGSC0003DMG400008123	Blind [Source:PGSC_GENE%3BAcc:PGSC0003DMG400008123]	0.0211701	0.244617	0.509737	2.77957	0.14065	0.33901	1.17345	6.08494	41.6955	6.04338	2.7865	0.20204	0.55889	FALSE	224.285	6.1955	5.178	0.00043505	0.010526	UP	10.6431	5.1172	1.0565	0.80852	0.99864	FALSE	19.3762	1.08524	3.0856	4.1582	0.00058985	0.0012583	UP	100.925	0.989966	6.6717	7.74e-24	6.2e-23	UP	8.39826	0.989306		0.060615	0.10057	FALSE
PGSC0003DMG400002857	Ribonuclease t2 [Source:PGSC_GENE%3BAcc:PGSC0003DMG400002857]	0.00723094	0.0853261	0.86663	3.81115	0.0256895	1.05138	2.6196	4.45116	102.309	1.20868	6.4034	0.0039807	0.057887	FALSE	179.228	1.2391	7.1764	0.00010573	0.0036825	UP	36.1948	1.02344	5.1443	0.056857	0.2952	FALSE	36.0596	0.406065	3.1229	6.4725	6.17e-09	2e-08	UP	151.436	0.371687	8.6704	9.35e-24	7.44e-23	UP	3.2073	0.36818		0.30989	0.42727	FALSE
PGSC0003DMG400000621	NtEIG-A1 protein [Source:PGSC_GENE%3BAcc:PGSC0003DMG400000621]	0.297505	11.6752	41.174	28.1909	0.478272	50.848	39.7718	11.3748	1591.28	22.9648	6.1146	9.14e-07	0.00017834	UP	465.058	23.5429	4.304	0.00028604	0.0077461	UP	1769.39	19.4454	6.5077	1.68e-06	0.00023678	UP	1749.09	17.0337	4.8549	6.6821	1.07e-63	2.92e-62	UP	1143.15	15.4739	6.207	1e-23	7.96e-23	UP	447.643	15.4688		2.19e-21	1.5e-20	UP
PGSC0003DMG400018801	Short chain alcohol dehydrogenase [Source:PGSC_GENE%3BAcc:PGSC0003DMG400018801]	0.0130056	0.0267051	0.537356	2.16642	0	0.25062	1.02542	3.47612	44.9494	0	Inf	0.019011	0.15867	FALSE	156.518	0	Inf	5.73e-05	0.0023998	UP	9.61741	0	Inf	0.23051	0.59992	FALSE	25.0896	0.817875	0.59779	4.9391	0.00058188	0.0012419	UP	96.7205	0.742508	7.0253	1.09e-23	8.65e-23	UP	1.12579	0.74388		0.96404	1	FALSE
PGSC0003DMG402006315	Histone H3.2 [Source:PGSC_GENE%3BAcc:PGSC0003DMG402006315]	0.0295314	0	1.46589	3.18324	0.250741	0.106123	2.82297	3.56537	90.8763	9.6694	3.2324	0.067155	0.32035	FALSE	117.44	9.9128	3.5665	0.018477	0.14046	FALSE	3.02078	8.18752	-1.4385	0.39626	0.77529	FALSE	49.9819	1.35836	#NAME?	5.2015	2.88e-10	1.01e-09	UP	103.756	1.23656	6.3907	1.18e-23	9.32e-23	UP	0	1.24225		0.52379	0.65965	FALSE
PGSC0003DMG400017997	Cytochrome P450 [Source:PGSC_GENE%3BAcc:PGSC0003DMG400017997]	0.0651992	0.133101	1.28594	23.0003	10.484	0.535432	9.9792	18.2039	686.722	869.038	-0.33969	0.6003	0.89823	FALSE	1290.1	890.913	0.53413	0.56825	0.87757	FALSE	32.3901	735.853	-4.5058	1.93e-06	0.00026006	DOWN	94.3697	6.4478	0.58916	3.8714	0.0063123	0.011861	UP	1610.4	5.88184	8.0969	2.15e-23	1.68e-22	UP	8.80931	5.85582		0.60582	0.74137	FALSE
PGSC0003DMG400029348	Thioesterase family protein [Source:PGSC_GENE%3BAcc:PGSC0003DMG400029348]	0.0206271	1.24167	2.69541	2.22133	0.481573	4.59006	2.61362	1.88271	114.681	25.3822	2.1757	0.16059	0.50289	FALSE	84.7027	26.0211	1.7027	0.24375	0.60093	FALSE	175.331	21.4922	3.0282	0.04406	0.25764	FALSE	125.661	1.29616	5.4724	6.5991	7.68e-28	6.43e-27	UP	98.9905	1.17588	6.3955	2.26e-23	1.76e-22	UP	52.264	1.1772		2.79e-12	1.2e-11	UP
PGSC0003DMG400027473	Hypersensitive response assisting protein [Source:PGSC_GENE%3BAcc:PGSC0003DMG400027473]	0.210545	0.808386	7.78758	50.0175	2.09269	6.46775	44.286	108.842	1473.01	83.3986	4.1426	0.00018661	0.0071512	UP	3718.25	85.4979	5.4426	4.73e-06	0.00039264	UP	187.438	70.6174	1.4083	0.31097	0.69237	FALSE	274.516	10.0067	1.5029	4.7778	5.86e-18	3.16e-17	UP	1684.08	9.10133	7.5317	3.32e-23	2.56e-22	UP	25.725	9.07693		0.021044	0.038213	UP
PGSC0003DMG400017556	Photosystem II 22 kDa protein%2C chloroplastic [Source:PGSC_GENE%3BAcc:PGSC0003DMG400017556]	0.626989	1.33289	10.0067	79.7745	1.33866	0.970222	9.88282	55.8853	546.36	89.442	2.6108	0.019429	0.16074	FALSE	3188.61	91.6934	5.12	8.84e-06	0.00061286	UP	47.0165	75.7346	-0.68778	0.48246	0.81966	FALSE	591.569	49.9767	0.64966	3.5652	1.91e-07	5.56e-07	UP	4510.3	45.5727	6.6289	4.8e-23	3.69e-22	UP	71.159	45.359		0.50199	0.63705	FALSE
PGSC0003DMG400026121	Thylakoid lumenal 29.8 kDa protein%2C chloroplast [Source:PGSC_GENE%3BAcc:PGSC0003DMG400026121]	0.0206502	0.0378481	0.676366	1.73087	0.263307	0.223571	1.60059	3.65576	91.9139	18.1301	2.3419	0.16026	0.50245	FALSE	215.873	18.5865	3.5379	0.007067	0.074658	FALSE	11.0824	15.3516	-0.47012	0.67028	0.9352	FALSE	41.2006	1.69648	0.43671	4.602	3.07e-08	9.48e-08	UP	100.963	1.54843	6.0269	6.66e-23	5.08e-22	UP	2.08151	1.53786		0.92078	1	FALSE
PGSC0003DMG400011243	R2r3-myb transcription factor [Source:PGSC_GENE%3BAcc:PGSC0003DMG400011243]	0.0133036	1.09785	0.955211	2.12214	0.0234416	4.37808	1.66214	5.57416	71.2162	1.20868	5.8807	0.013928	0.13027	FALSE	245.621	1.2391	7.631	1.77e-05	0.0010206	UP	165.12	1.02344	7.3339	0.0005044	0.014706	UP	43.5277	0.817875	5.9253	5.7339	4.13e-05	9.87e-05	UP	92.6088	0.742508	6.9626	9.12e-23	6.9e-22	UP	45.2067	0.74388		3.22e-11	1.3e-10	UP
PGSC0003DMG400023570	Conserved gene of unknown function [Source:PGSC_GENE%3BAcc:PGSC0003DMG400023570]	0.0262445	0.299338	0.891661	3.31319	0	3.95966	4.45515	7.41385	250.132	0	Inf	1.67e-05	0.0013766	UP	428.01	0	Inf	8.7e-08	2.1e-05	UP	192.405	0	Inf	7.41e-05	0.0036767	UP	53.135	2.10829	3.071	4.6555	2.71e-10	9.53e-10	UP	188.5	1.91925	6.6179	1.16e-22	8.74e-22	UP	16.0809	1.91356		0.0084908	0.016385	UP
PGSC0003DMG400016960	Cytochrome P450 [Source:PGSC_GENE%3BAcc:PGSC0003DMG400016960]	0.00641491	0.200983	2.35011	1.16385	0.355546	0.29849	2.70157	1.48799	258.702	41.095	2.6543	0.041122	0.24323	FALSE	147.348	42.1294	1.8063	0.15926	0.48585	FALSE	24.6747	34.797	-0.49593	0.66323	0.9309	FALSE	240.417	0.884351	4.5335	8.0867	2.47e-12	9.86e-12	UP	113.98	0.805055	7.1455	1.68e-22	1.25e-21	UP	18.5619	0.801497		0.00083705	0.0018326	UP
PGSC0003DMG400030996	Protein phosphatase inhibitor 2 containing protein [Source:PGSC_GENE%3BAcc:PGSC0003DMG400030996]	0.00961686	0.20567	0.726858	2.8905	0.136664	0.380329	0.857331	2.64332	25.1208	4.8347	2.3774	0.35003	0.72475	FALSE	79.9796	4.9564	4.0123	0.020995	0.15282	FALSE	9.66671	4.09376	1.2396	0.75268	0.97738	FALSE	22.7429	0.406065	3.9778	5.8076	1.08e-05	2.73e-05	UP	86.4135	0.371687	7.861	2.07e-22	1.54e-21	UP	5.80084	0.36818		0.11022	0.17271	FALSE
PGSC0003DMG400008876	Nucleic acid-binding%2C OB-fold [Source:PGSC_GENE%3BAcc:PGSC0003DMG400008876]	0.0167221	0.322517	7.07615	3.13579	0	0.77962	6.53468	3.517	186.377	0	Inf	8.52e-05	0.0042376	UP	102.563	0	Inf	0.00048769	0.011508	UP	19.2628	0	Inf	0.080579	0.36067	FALSE	213.209	0.679179	3.8211	8.2943	2.37e-24	1.71e-23	UP	90.2812	0.618279	7.19	2.82e-22	2.08e-21	UP	8.77897	0.621126		0.23928	0.34243	FALSE
PGSC0003DMG400003371	Arabinogalactan protein 2 [Source:PGSC_GENE%3BAcc:PGSC0003DMG400003371]	0.00660282	0.357496	0.783271	2.1276	0.234579	0.504624	1.60394	1.42442	68.9169	12.0868	2.5114	0.17153	0.52241	FALSE	62.7957	12.391	2.3414	0.15428	0.47891	FALSE	19.0502	10.2344	0.89638	0.79324	0.99419	FALSE	35.6969	0.406065	5.3206	6.4579	8.18e-09	2.62e-08	UP	92.7242	0.371687	7.9627	3.63e-22	2.66e-21	UP	14.7136	0.36818		0.00047985	0.0010793	UP
PGSC0003DMG400000591	Gene of unknown function [Source:PGSC_GENE%3BAcc:PGSC0003DMG400000591]	0.133463	0.775485	6.3151	21.2219	0.154607	2.85964	11.6343	16.1146	227.05	3.62603	5.9685	0.00043271	0.012928	UP	324.345	3.7173	6.4471	1.73e-05	0.0010086	UP	48.3823	3.07032	3.978	0.07369	0.34193	FALSE	131.075	3.73402	2.095	5.1335	2.89e-10	1.02e-09	UP	420.301	3.40327	6.9484	3.79e-22	2.77e-21	UP	14.5314	3.40123		0.049206	0.0832	FALSE
Novel01676	PREDICTED: peroxidase 49-like [Solanum tuberosum]	0.109926	0.670845	6.17186	17.3328	0.530198	4.00576	16.3948	16.8816	466.186	18.1301	4.6844	0.0003634	0.01134	UP	494.322	18.5865	4.7331	9.46e-05	0.003399	UP	99.426	15.3516	2.6952	0.1074	0.41523	FALSE	186.725	4.48395	2.1701	5.38	4.2e-25	3.14e-24	UP	500.46	4.08596	6.9364	4.45e-22	3.25e-21	UP	18.3287	4.07254		0.016022	0.029654	UP
PGSC0003DMG400021519	Cyclin A [Source:PGSC_GENE%3BAcc:PGSC0003DMG400021519]	0.00399639	0.00738666	2.16775	0.994917	0.108346	0.0461677	0.765011	0.521037	63.9902	10.8781	2.5564	0.1722	0.52351	FALSE	44.6947	11.1519	2.0028	0.25828	0.61879	FALSE	3.35571	9.21096	-1.4567	0.37954	0.76023	FALSE	192.577	0.478286	0.449	8.6533	3.15e-26	2.48e-25	UP	84.4141	0.433368	7.6057	6.79e-22	4.92e-21	UP	0.59152	0.433317		1	1	FALSE
PGSC0003DMG400024070	Conserved gene of unknown function [Source:PGSC_GENE%3BAcc:PGSC0003DMG400024070]	0.00384026	0.0283126	0.0269123	1.25885	0	0.0197031	0.0235129	0.813691	2.07299	0	Inf	0.84216	1	FALSE	73.0066	0	Inf	0.0019933	0.030958	UP	1.4716	0	Inf	0.87876	1	FALSE	2.48875	0.478286	2.4471	2.3795	0.49148	0.61863	FALSE	111.134	0.433368	8.0025	1.51e-21	1.08e-20	UP	2.36296	0.433317		0.46889	0.60302	FALSE
Novel02018	PREDICTED: MATE efflux family protein 5-like [Solanum tuberosum]	0.0700615	1.49074	2.71577	6.14317	0.0182761	4.34629	4.15902	3.60089	228.797	1.20868	7.5645	9.99e-05	0.0047014	UP	204.143	1.2391	7.3641	5.32e-05	0.0022508	UP	208.814	1.02344	7.6726	0.00017356	0.0069339	UP	158.929	5.52423	3.9714	4.8465	2.65e-15	1.24e-14	UP	343.159	5.01264	6.0972	2.28e-21	1.62e-20	UP	78.7309	5.01935		1.09e-13	5.11e-13	UP
PGSC0003DMG400018549	Conserved gene of unknown function [Source:PGSC_GENE%3BAcc:PGSC0003DMG400018549]	0.00611007	0	0.0161839	1.47863	0	0	0	0.726256	0	0	NA	NA	NA	NA	40.7256	0	Inf	0.012424	0.10907	FALSE	0	0	NA	NA	NA	NA	0.937843	0.478286	#NAME?	0.97147	0.89534	0.98212	FALSE	82.1601	0.433368	7.5667	2.84e-21	2e-20	UP	0	0.433317		0.97327	1	FALSE
PGSC0003DMG401019255	Pectinesterase 3 [Source:PGSC_GENE%3BAcc:PGSC0003DMG401019255]	0.0408076	0.0844966	1.32473	6.47703	0.173107	0.0512549	2.36774	6.57754	138.362	12.0868	3.5169	0.029014	0.20177	FALSE	393.826	12.391	4.9902	0.00011219	0.0038337	UP	2.62228	10.2344	-1.9645	0.26884	0.64642	FALSE	81.8394	3.39871	0.61201	4.5897	7.04e-15	3.24e-14	UP	381.906	3.09599	6.9467	3.49e-21	2.46e-20	UP	4.71239	3.08323		0.6969	0.82437	FALSE
PGSC0003DMG400024602	Conserved gene of unknown function [Source:PGSC_GENE%3BAcc:PGSC0003DMG400024602]	0.0103162	0.088978	0.597029	1.53105	0.290843	0.63277	1.03067	1.3326	56.9153	19.3388	1.5573	0.41627	0.76284	FALSE	75.6307	19.8256	1.9316	0.20384	0.54917	FALSE	30.0965	16.375	0.8781	0.69418	0.94627	FALSE	35.1533	0.817875	2.6675	5.4256	0.0025686	0.0050774	UP	86.212	0.742508	6.8593	3.6e-21	2.53e-20	UP	4.72592	0.74388		0.22089	0.31909	FALSE
PGSC0003DMG400026540	Conserved gene of unknown function [Source:PGSC_GENE%3BAcc:PGSC0003DMG400026540]	0.0116003	0.0407211	0.525964	5.22968	7.26836	3.45287	29.9586	47.1961	866.674	251.404	1.7855	0.073257	0.33317	FALSE	1399.7	257.733	2.4412	0.0098904	0.094185	FALSE	87.2338	212.876	-1.2871	0.18431	0.54317	FALSE	16.1075	0.478286	1.3774	5.0737	0.0022473	0.0044782	UP	152.74	0.433368	8.4613	6.51e-21	4.52e-20	UP	1.12579	0.433317		0.8184	0.92419	FALSE
PGSC0003DMG400005101	DNA binding protein [Source:PGSC_GENE%3BAcc:PGSC0003DMG400005101]	0.115775	0.35964	14.808	14.2555	0.215006	1.47277	12.5535	10.4444	408.974	8.46073	5.5951	0.0001017	0.0047449	UP	351.366	8.6737	5.3402	7.79e-05	0.0030296	UP	42.2978	7.16408	2.5617	0.21893	0.58515	FALSE	515.303	5.43478	1.1973	6.5671	3.78e-91	2.11e-89	UP	473.671	4.95356	6.5793	6.7e-21	4.65e-20	UP	11.309	4.93165		0.22675	0.32648	FALSE
PGSC0003DMG400004371	Myb 12 transcription factor [Source:PGSC_GENE%3BAcc:PGSC0003DMG400004371]	0.0314086	0.676187	16.7603	13.8446	0.539763	4.22273	37.27	28.5578	1802.61	31.4256	5.842	1.91e-06	0.00030489	UP	1426.13	32.2166	5.4682	1.56e-06	0.0001685	UP	179.007	26.6094	2.75	0.060175	0.30597	FALSE	862.864	2.18051	3.9893	8.6283	3.12e-58	7.33e-57	UP	683.507	1.98093	8.4306	8.92e-21	6.15e-20	UP	31.425	1.97869		2.45e-06	6.88e-06	UP
PGSC0003DMG400011972	Glucosyltransferase [Source:PGSC_GENE%3BAcc:PGSC0003DMG400011972]	0.0109751	0.374575	0.955025	1.16504	0.0819983	1.06224	0.684846	1.18063	50.3093	7.25205	2.7944	0.17406	0.52423	FALSE	89.3974	7.4346	3.5879	0.028034	0.18227	FALSE	67.9643	6.14064	3.4683	0.07333	0.34087	FALSE	74.6746	1.15746	4.6489	6.0116	2.8e-16	1.38e-15	UP	87.104	1.05165	6.372	1.23e-20	8.45e-20	UP	26.4534	1.05444		5.5e-06	1.5e-05	UP
PGSC0003DMG400015555	Chloroplast-targeted copper chaperone [Source:PGSC_GENE%3BAcc:PGSC0003DMG400015555]	0.00572377	0.15836	0.148364	1.57843	0.671052	0.20227	0.445821	0.390169	22.2238	39.8863	-0.84379	0.4821	0.81594	FALSE	19.5155	40.8903	-1.0671	0.38681	0.75067	FALSE	8.57296	33.7735	-1.978	0.18849	0.54748	FALSE	7.7886	0.406065	4.353	4.2616	0.052496	0.085582	FALSE	79.3305	0.371687	7.7376	1.29e-20	8.87e-20	UP	7.52373	0.36818		0.029703	0.052536	FALSE
PGSC0003DMG400031513	Extensin (ext) [Source:PGSC_GENE%3BAcc:PGSC0003DMG400031513]	0.0213959	0.208854	2.95175	2.2634	0	0.246537	3.24861	2.60337	122.047	0	Inf	0.00062924	0.016307	UP	100.826	0	Inf	0.00050393	0.01172	UP	8.06823	0	Inf	0.27727	0.65577	FALSE	118.485	1.15746	2.8436	6.6776	1.61e-14	7.27e-14	UP	86.7952	1.05165	6.3669	1.36e-20	9.32e-20	UP	7.56901	1.05444		0.088108	0.14131	FALSE
PGSC0003DMG400005092	F-box and wd40 domain protein [Source:PGSC_GENE%3BAcc:PGSC0003DMG400005092]	0.0280926	0.4171	1.5452	3.09126	0.096147	1.49396	3.41316	3.71454	820.266	27.7995	4.883	5.82e-05	0.0031792	UP	919.602	28.4993	5.012	9.95e-06	0.00066496	UP	313.736	23.5391	3.7364	0.0075555	0.08721	FALSE	395.398	9.68436	3.4536	5.3515	4.21e-11	1.56e-10	UP	754.632	8.78959	6.4238	2.43e-20	1.64e-19	UP	96.2853	8.78893		2.31e-14	1.12e-13	UP
Novel03169	--	0.00835829	0.00949218	0.0218665	2.14154	0.0589109	0.0632995	0.210143	1.23913	14.2943	4.8347	1.5639	0.64231	0.92508	FALSE	86.9103	4.9564	4.1322	0.015645	0.12646	FALSE	3.72147	4.09376	-0.13755	0.87402	1	FALSE	1.5866	0.817875	-0.26246	0.95598	0.86195	0.95327	FALSE	148.415	0.742508	7.643	2.58e-20	1.74e-19	UP	0.620147	0.74388		1	1	FALSE
PGSC0003DMG400002292	Conserved gene of unknown function [Source:PGSC_GENE%3BAcc:PGSC0003DMG400002292]	0.0142318	0.580389	2.75136	2.54372	0.2552	0.30092	4.86286	2.51689	208.897	13.2954	3.9738	0.0076827	0.089232	FALSE	111.607	13.6301	3.0336	0.03805	0.21912	FALSE	11.3718	11.2578	0.014525	0.8696	1	FALSE	126.845	0.884351	4.9118	7.1642	4.1e-16	2.01e-15	UP	111.973	0.805055	7.1199	3.89e-20	2.6e-19	UP	24.127	0.801497		7.07e-06	1.91e-05	UP
PGSC0003DMG400008610	Histone H3.2 [Source:PGSC_GENE%3BAcc:PGSC0003DMG400008610]	0.0113267	0.185088	6.45228	3.58998	0.192342	0.0855706	5.5752	2.61537	117.439	4.8347	4.6023	0.01119	0.11402	FALSE	56.3237	4.9564	3.5064	0.057243	0.27851	FALSE	1.54253	4.09376	-1.4081	0.51185	0.84044	FALSE	143.517	0.33959	3.5808	8.7232	2.09e-18	1.15e-17	UP	76.2257	0.30914	7.9459	6.98e-20	4.6e-19	UP	3.71606	0.310563		0.28247	0.39501	FALSE
PGSC0003DMG400010987	WRKY 13 [Source:PGSC_GENE%3BAcc:PGSC0003DMG400010987]	0.010379	0.0545509	0.760827	0.855092	1.5841	3.06537	8.5031	3.93229	825.893	183.719	2.1685	0.035357	0.22487	FALSE	388.689	188.343	1.0453	0.30115	0.66949	FALSE	255.979	155.563	0.71853	0.56519	0.87554	FALSE	77.9982	1.43486	1.9581	5.7645	3.13e-10	1.1e-09	UP	83.9175	1.3001	6.0123	9.08e-20	5.94e-19	UP	5.05109	1.29995		0.25771	0.3647	FALSE
PGSC0003DMG400023522	Histone H4 [Source:PGSC_GENE%3BAcc:PGSC0003DMG400023522]	0.0156071	0.0151505	1.30955	3.46636	0.0470139	0.0369413	5.76175	4.89674	123.549	1.20868	6.6755	0.0018772	0.034261	UP	107.764	1.2391	6.4424	0.0012734	0.022548	UP	0.694294	1.02344	-0.55981	0.92422	1	FALSE	29.7921	0.478286	-0.48281	5.9609	2.61e-07	7.51e-07	UP	75.335	0.433368	7.4416	1.11e-19	7.25e-19	UP	0.310073	0.433317		1	1	FALSE
Novel02409	PREDICTED: intracellular ribonuclease LX-like [Solanum tuberosum]	0.00998052	1.96645	2.21797	2.61888	0.248205	1.82313	2.51508	5.23655	71.2435	8.46073	3.0739	0.10247	0.40173	FALSE	152.945	8.6737	4.1402	0.0053761	0.062465	FALSE	44.6494	7.16408	2.6398	0.19697	0.55953	FALSE	66.8746	0.406065	7.1838	7.3636	2.73e-16	1.35e-15	UP	75.4892	0.371687	7.666	1.15e-19	7.5e-19	UP	53.5298	0.36818		3.74e-14	1.79e-13	UP
PGSC0003DMG400029934	Sphingolipid delta-8 desaturase [Source:PGSC_GENE%3BAcc:PGSC0003DMG400029934]	0.00540501	0.343612	0.454729	1.38198	0.15681	0.380746	1.47004	1.16904	141.131	18.1301	2.9606	0.054432	0.28417	FALSE	115.958	18.5865	2.6413	0.064286	0.29796	FALSE	31.8616	15.3516	1.0534	0.65716	0.92752	FALSE	46.5105	0.745655	5.5464	5.9629	1.34e-10	4.81e-10	UP	134.988	0.680826	7.6313	1.83e-19	1.18e-18	UP	31.7198	0.678743		8.56e-08	2.71e-07	UP
Novel00454	CEN-like protein 1-like [Solanum tuberosum]>gi|532023496|gb|AGT63062.1| terminal flowering 1-like protein [Solanum tuberosum]	0.0201826	0.151573	0.300981	2.52776	0.460607	0.301408	0.634562	2.34894	19.1873	16.9215	0.1813	1	1	FALSE	73.4075	17.3474	2.0812	0.1782	0.51279	FALSE	7.87866	14.3282	-0.86283	0.58167	0.8829	FALSE	9.78893	0.884351	2.4718	3.4685	0.033963	0.05724	FALSE	78.5438	0.805055	6.6083	2.04e-19	1.32e-18	UP	4.44603	0.801497		0.24895	0.35429	FALSE
PGSC0003DMG400024159	Conserved gene of unknown function [Source:PGSC_GENE%3BAcc:PGSC0003DMG400024159]	0.00295811	0.00306169	1.24653	0.767278	0.0525466	0.0120487	0.57688	0.309484	55.0212	6.04338	3.1866	0.11779	0.42979	FALSE	30.441	6.1955	2.2967	0.26155	0.62329	FALSE	0.990085	5.1172	-2.3697	0.28418	0.66062	FALSE	126.845	0.406065	-0.38755	8.2871	4.38e-30	4.04e-29	UP	74.7425	0.371687	7.6517	2.08e-19	1.34e-18	UP	0.281446	0.36818		1	1	FALSE
Novel01076	--	0.00854982	0.0818777	0.0493154	2.88874	0.181484	1.12898	2.04135	6.0436	56.5	6.04338	3.2248	0.11464	0.42363	FALSE	171.649	6.1955	4.7921	0.0015524	0.026123	UP	26.9714	5.1172	2.398	0.30418	0.68471	FALSE	1.45031	0.33959	2.8051	2.0945	0.74764	0.85946	FALSE	81.2374	0.30914	8.0377	2.96e-19	1.9e-18	UP	2.17051	0.310563		0.57346	0.70849	FALSE
PGSC0003DMG400022097	Conserved gene of unknown function [Source:PGSC_GENE%3BAcc:PGSC0003DMG400022097]	0.0514031	0.318032	1.52548	5.86274	0	2.05937	4.04056	5.2491	131.073	0	Inf	0.00048033	0.013805	UP	175.109	0	Inf	3.17e-05	0.0015505	UP	58.5267	0	Inf	0.0070089	0.08317	FALSE	52.6562	2.39143	2.1934	4.4607	3.27e-09	1.07e-08	UP	193.231	2.16684	6.4786	4.13e-19	2.63e-18	UP	9.90958	2.16658		0.062203	0.10295	FALSE
PGSC0003DMG400012658	Anthocyanidin 3-O-glucosyltransferase 5 [Source:PGSC_GENE%3BAcc:PGSC0003DMG400012658]	0.0122047	0.0242442	0.252454	1.59488	0.077719	0.2262	3.25202	11.7263	253.995	7.25205	5.1303	0.00096548	0.02197	UP	935.189	7.4346	6.9749	6.64e-08	1.76e-05	UP	15.2163	6.14064	1.3092	0.68566	0.94275	FALSE	20.835	1.35836	0.53759	3.9391	0.00061914	0.0013173	UP	125.692	1.23656	6.6674	4.86e-19	3.08e-18	UP	1.80319	1.24225		1	1	FALSE
PGSC0003DMG400021152	Alcohol dehydrogenase [Source:PGSC_GENE%3BAcc:PGSC0003DMG400021152]	0.00320877	0.162121	0.115906	2.20749	0.381423	9.10059	3.58277	1.06034	265.151	33.8429	2.9699	0.024074	0.18237	FALSE	80.0235	34.6948	1.2057	0.41152	0.75657	FALSE	584.981	28.6563	4.3515	0.00094577	0.022803	UP	9.10732	0.33959	5.2113	4.7452	0.04459	0.073615	FALSE	165.358	0.30914	9.0631	7.66e-19	4.8e-18	UP	11.5058	0.310563		0.23178	0.33282	FALSE
PGSC0003DMG400000684	Laccase [Source:PGSC_GENE%3BAcc:PGSC0003DMG400000684]	0.0612739	0.604971	9.84975	15.1174	0.389706	14.3781	25.8545	36.9823	2811.14	50.7644	5.7912	3e-06	0.00040913	UP	4125.43	52.0422	6.3087	6.11e-07	8.39e-05	UP	1365.92	42.9845	4.9899	6.66e-05	0.003414	UP	1134.21	9.51987	2.8611	6.8965	5.81e-13	2.4e-12	UP	1662.15	8.66423	7.5838	1.41e-18	8.7e-18	UP	62.9117	8.65849		7.68e-08	2.44e-07	UP
PGSC0003DMG400035647	Disease resistance response protein [Source:PGSC_GENE%3BAcc:PGSC0003DMG400035647]	0.0099596	0.275094	1.40776	2.44793	2.40608	0.575739	5.88818	3.63782	167.13	82.1899	1.0239	0.46045	0.79817	FALSE	104.782	84.2588	0.3145	0.8493	1	FALSE	14.231	69.5939	-2.2899	0.075234	0.34586	FALSE	42.5443	0.406065	4.347	6.7111	2.04e-10	7.25e-10	UP	70.7684	0.371687	7.5729	1.96e-18	1.21e-17	UP	7.49263	0.36818		0.032283	0.056699	FALSE
Novel02424	PREDICTED: ubiquitin-conjugating enzyme E2 20-like [Solanum tuberosum]	0.00520058	0.0917091	0.0277357	2.96853	0.0184762	0.0719448	0.0444367	2.63043	2.42619	1.20868	1.0053	1	1	FALSE	147.971	1.2391	6.8999	0.00030073	0.0080466	UP	3.3818	1.02344	1.7244	0.90025	1	FALSE	1.60554	0.406065	3.7004	1.9833	0.71672	0.8351	FALSE	163.967	0.371687	8.7851	2.03e-18	1.25e-17	UP	4.78629	0.36818		0.14018	0.21397	FALSE
PGSC0003DMG400001774	Peroxidase [Source:PGSC_GENE%3BAcc:PGSC0003DMG400001774]	0.0791098	0.686475	1.41497	10.8715	0.139808	1.41683	1.06373	2.50398	68.5665	10.8781	2.6561	0.14973	0.48863	FALSE	166.877	11.1519	3.9034	0.0060579	0.067994	FALSE	80.1924	9.21096	3.122	0.085018	0.36992	FALSE	97.4179	7.34217	2.6793	3.7299	1.22e-12	4.96e-12	UP	714.039	6.6879	6.7383	4.33e-18	2.62e-17	UP	42.6424	6.6574		1.15e-05	3.04e-05	UP
PGSC0003DMG400027728	Conserved gene of unknown function [Source:PGSC_GENE%3BAcc:PGSC0003DMG400027728]	0.00693433	0.0514108	0.505722	1.41113	0.125331	0.192539	0.735046	3.04028	35.4703	7.25205	2.2901	0.31029	0.68384	FALSE	150.997	7.4346	4.3441	0.004291	0.053481	FALSE	8.16359	6.14064	0.41081	1	1	FALSE	25.852	0.478286	2.4553	5.7563	0.003439	0.0066907	UP	69.0766	0.433368	7.3165	4.84e-18	2.92e-17	UP	2.37649	0.433317		0.46758	0.60163	FALSE
PGSC0003DMG400016505	Helicase [Source:PGSC_GENE%3BAcc:PGSC0003DMG400016505]	0.00492756	0.603011	1.26677	0.431855	0.00580398	0.559845	1.09312	0.357661	189.335	1.20868	7.2914	0.00026724	0.0091387	UP	63.672	1.2391	5.6833	0.0092832	0.090204	FALSE	84.1631	1.02344	6.3617	0.0061025	0.075999	FALSE	233.395	1.22394	6.4945	7.5751	1.19e-42	1.74e-41	UP	76.0196	1.11419	6.0923	4.92e-18	2.97e-17	UP	100.272	1.11206		4.27e-24	3.31e-23	UP
PGSC0003DMG400023210	Phospholipase C [Source:PGSC_GENE%3BAcc:PGSC0003DMG400023210]	0.0328688	0.369904	0.551241	3.71502	0.214323	0.793588	1.35157	1.65166	50.951	9.6694	2.3976	0.23057	0.59444	FALSE	63.7774	9.9128	2.6857	0.10838	0.39881	FALSE	26.006	8.18752	1.6673	0.48634	0.82095	FALSE	22.0043	1.7687	3.0552	3.637	0.00036013	0.00078453	UP	141.53	1.61011	6.4578	6.68e-18	3.99e-17	UP	13.3246	1.60299		0.0098625	0.01883	UP
PGSC0003DMG400016113	Alcohol NADP+ oxidoreductase [Source:PGSC_GENE%3BAcc:PGSC0003DMG400016113]	0.00946588	0.0518002	0.6037	3.45469	0	0	1.19718	1.92951	30.0111	0	Inf	0.047248	0.26481	FALSE	49.6055	0	Inf	0.0069329	0.073618	FALSE	0	0	NA	NA	NA	NA	16.0722	0.33959	1.9977	5.5646	0.00053604	0.001149	UP	87.7515	0.30914	8.149	7.6e-18	4.53e-17	UP	1.24029	0.310563		0.81922	0.92479	FALSE
PGSC0003DMG400026167	Lipid binding protein [Source:PGSC_GENE%3BAcc:PGSC0003DMG400026167]	0.00582516	0.175644	1.66238	1.57666	0.0741889	0.391412	2.58456	1.59775	104.752	3.62603	4.8525	0.011418	0.11539	FALSE	66.9992	3.7173	4.1718	0.025321	0.17081	FALSE	13.9727	3.07032	2.1861	0.46906	0.81741	FALSE	71.8839	0.33959	4.4637	7.7257	2.05e-17	1.08e-16	UP	65.1657	0.30914	7.7197	4.14e-17	2.39e-16	UP	6.85271	0.310563		0.046332	0.078761	FALSE
PGSC0003DMG400001528	Class II chitinase [Source:PGSC_GENE%3BAcc:PGSC0003DMG400001528]	0.340566	4.31128	14.527	37.7243	5.65732	10.4535	8.84415	17.7685	472.576	363.811	0.37736	0.75232	0.97518	FALSE	975.635	372.969	1.3873	0.12609	0.43229	FALSE	484.062	308.055	0.652	0.58233	0.88317	FALSE	826.489	26.1216	3.2245	4.9837	3.28e-49	5.89e-48	UP	2047.75	23.7754	6.4284	4.86e-17	2.81e-16	UP	221.521	23.6991		1.6e-06	4.56e-06	UP
PGSC0003DMG400000530	Leaf senescence protein [Source:PGSC_GENE%3BAcc:PGSC0003DMG400000530]	0.0120182	0.0836753	1.04798	1.31629	0.176322	0.47781	2.25827	2.50475	115.436	10.8781	3.4076	0.040981	0.243	FALSE	132.464	11.1519	3.5702	0.0155	0.12564	FALSE	21.3259	9.21096	1.2112	0.64755	0.92347	FALSE	57.1997	0.884351	2.3627	6.0152	4.65e-13	1.94e-12	UP	68.6554	0.805055	6.4141	5.04e-17	2.91e-16	UP	4.12243	0.801497		0.28585	0.39908	FALSE
PGSC0003DMG400030964	Purple acid phosphatase [Source:PGSC_GENE%3BAcc:PGSC0003DMG400030964]	0.0268908	0.591864	1.7919	5.16736	0.108656	9.05338	21.3402	10.8484	1775.39	10.8781	7.3506	4.34e-08	2.34e-05	UP	923.874	11.1519	6.3723	2.61e-07	4.56e-05	UP	658.395	9.21096	6.1595	2.05e-05	0.0014746	UP	158.775	3.2093	4.0233	5.6286	1.18e-09	3.98e-09	UP	436.785	2.90935	7.2301	5.12e-17	2.95e-16	UP	47.3257	2.91046		3.45e-09	1.22e-08	UP
PGSC0003DMG400019471	Cytochrome P450 [Source:PGSC_GENE%3BAcc:PGSC0003DMG400019471]	0.00349509	0.0453167	0.614184	1.67092	0.103864	0.930516	7.09744	3.37019	481.604	8.46073	5.8309	3.94e-05	0.0024979	UP	235.234	8.6737	4.7613	0.00069838	0.014909	UP	54.8588	7.16408	2.9369	0.13489	0.46387	FALSE	44.2774	0.33959	3.2484	7.0266	4.7e-09	1.53e-08	UP	115.055	0.30914	8.5398	6.25e-17	3.58e-16	UP	2.95136	0.310563		0.3608	0.48688	FALSE
Novel03278	PREDICTED: 2-isopropylmalate synthase A-like [Solanum tuberosum]	0.13015	0.281951	3.79835	25.523	0.216848	0.718102	36.2925	90.6642	1007.07	7.25205	7.1176	2.17e-07	6.96e-05	UP	2601.55	7.4346	8.4509	8.1e-10	5.59e-07	UP	17.5561	6.14064	1.5155	0.61901	0.90732	FALSE	112.34	5.18892	0.67957	4.4363	2.68e-18	1.47e-17	UP	720.634	4.70537	7.2588	1.05e-16	5.97e-16	UP	7.52997	4.70135		0.53537	0.67073	FALSE
PGSC0003DMG400024643	Flavonoid 3'-monooxygenase [Source:PGSC_GENE%3BAcc:PGSC0003DMG400024643]	2.53085	26.6114	305.782	229.456	4.6813	13.6054	435.288	346.424	34638.4	447.21	6.2753	0.0030589	0.048016	UP	28366.9	458.467	5.9512	0.0019972	0.030971	UP	942.392	378.673	1.3154	0.2157	0.57981	FALSE	25830.2	288.35	2.9541	6.4851	4.32e-53	8.64e-52	UP	18587.4	262.322	6.1468	1.34e-16	7.55e-16	UP	2030.05	261.968		2.8e-07	8.5e-07	UP
PGSC0003DMG400020258	Blue copper protein [Source:PGSC_GENE%3BAcc:PGSC0003DMG400020258]	0.0240239	0.0640688	2.43046	3.54744	0.0853501	0.505573	13.7698	11.9574	326.071	2.41735	7.0756	3.31e-05	0.002209	UP	289.56	2.4782	6.8684	1.67e-05	0.00098327	UP	10.5031	2.04688	2.3593	0.51129	0.84044	FALSE	60.88	0.81213	0.97697	6.2281	4.88e-14	2.14e-13	UP	85.1054	0.743373	6.839	1.95e-16	1.09e-15	UP	1.44939	0.736359		0.86409	0.96452	FALSE
PGSC0003DMG400020848	Serine-threonine protein kinase%2C plant-type [Source:PGSC_GENE%3BAcc:PGSC0003DMG400020848]	0.00172451	0.0742535	0.571698	0.312264	0.0467534	0.134214	0.994727	0.378655	190.956	10.8781	4.1337	0.0072807	0.086302	FALSE	74.9273	11.1519	2.7482	0.084855	0.34893	FALSE	22.9072	9.21096	1.3144	0.62441	0.91078	FALSE	117.647	0.478286	4.9931	7.9424	3.28e-28	2.78e-27	UP	61.4422	0.433368	7.1475	3.77e-16	2.08e-15	UP	13.8	0.433317		0.0007978	0.001751	UP
PGSC0003DMG400024452	Pyridoxal-dependent decarboxylase%2C C-terminal sheet domain containing protein [Source:PGSC_GENE%3BAcc:PGSC0003DMG400024452]	0.0158275	0.450656	4.03382	1.51753	0	0	0.634151	0.656083	26.7353	0	Inf	0.059664	0.29969	FALSE	28.5348	0	Inf	0.030713	0.19281	FALSE	0	0	NA	NA	NA	NA	180.872	0.956571	4.3967	7.5629	4.6e-41	6.38e-40	UP	65.0905	0.866736	6.2307	4.21e-16	2.32e-15	UP	18.2549	0.866634		0.00017894	0.00042086	UP
PGSC0003DMG400027270	Conserved gene of unknown function [Source:PGSC_GENE%3BAcc:PGSC0003DMG400027270]	0.00959743	0.019867	0.30746	3.94783	1.057	0.155134	0.574914	1.21486	17.0244	37.4689	-1.1381	0.37066	0.74171	FALSE	36.9805	38.4121	-0.054797	0.86509	1	FALSE	4.0557	31.7266	-2.9677	0.051962	0.28055	FALSE	9.64171	0.406065	0.61245	4.5695	0.014183	0.025374	UP	118.134	0.371687	8.3121	4.29e-16	2.36e-15	UP	0.562893	0.36818		1	1	FALSE
PGSC0003DMG400014227	Conserved gene of unknown function [Source:PGSC_GENE%3BAcc:PGSC0003DMG400014227]	0.00789452	0.53267	1.22405	1.797	0.1673	1.14386	1.26691	1.69006	98.7239	15.7128	2.6515	0.10932	0.41477	FALSE	135.774	16.1083	3.0753	0.029453	0.18804	FALSE	77.3824	13.3047	2.5401	0.14914	0.48808	FALSE	101.672	0.884351	5.6392	6.8451	1.65e-23	1.15e-22	UP	142.492	0.805055	7.4676	1.51e-15	8.09e-15	UP	39.9451	0.801497		7.37e-10	2.73e-09	UP
PGSC0003DMG400013176	DUF26 domain-containing protein 2 [Source:PGSC_GENE%3BAcc:PGSC0003DMG400013176]	0.012743	1.12782	1.51685	1.26982	0	0.826035	0.797213	0.250623	39.0423	0	Inf	0.026795	0.19344	FALSE	12.3748	0	Inf	0.14717	0.46745	FALSE	35.3589	0	Inf	0.02678	0.19199	FALSE	78.0698	0.884351	6.0309	6.464	5.53e-18	2.99e-17	UP	62.4441	0.805055	6.2773	1.57e-15	8.41e-15	UP	52.4069	0.801497		4.88e-13	2.2e-12	UP
PGSC0003DMG400014643	HAP3 subunit of HAP complex [Source:PGSC_GENE%3BAcc:PGSC0003DMG400014643]	0.00609068	0.100506	0.312625	1.61771	0.173107	0.0333675	0.498147	1.98125	23.1094	9.6694	1.257	0.65627	0.93207	FALSE	94.8081	9.9128	3.2576	0.038806	0.22175	FALSE	1.37554	8.18752	-2.5734	0.1912	0.55173	FALSE	15.4272	0.406065	3.6067	5.2476	0.010553	0.019229	UP	76.29	0.371687	7.6813	1.76e-15	9.4e-15	UP	4.48508	0.36818		0.16419	0.2462	FALSE
Novel02473	PREDICTED: LOB domain-containing protein 11-like [Solanum tuberosum]	0.0128655	0.810238	2.09598	2.21534	0.0387554	8.12804	3.50365	2.15891	90.7487	1.20868	6.2304	0.0061044	0.076591	FALSE	57.6031	1.2391	5.5388	0.01227	0.1083	FALSE	185.245	1.02344	7.4999	0.00030524	0.010341	UP	57.8244	0.478286	5.5411	6.9177	1.19e-09	4.04e-09	UP	58.3911	0.433368	7.074	2.33e-15	1.23e-14	UP	20.1757	0.433317		1.9e-05	4.93e-05	UP
PGSC0003DMG400025442	Gene of unknown function [Source:PGSC_GENE%3BAcc:PGSC0003DMG400025442]	0.0268308	0.487946	1.15457	2.78852	0	0.110052	0.604974	3.48157	12.9421	0	Inf	0.18244	0.52948	FALSE	76.4148	0	Inf	0.0016584	0.027348	UP	2.06984	0	Inf	0.8032	0.99821	FALSE	26.1125	0.817875	3.7433	4.9967	7.42e-06	1.9e-05	UP	60.2018	0.742508	6.3413	5.89e-15	3.05e-14	UP	9.96216	0.74388		0.016466	0.030407	UP
Novel00573	PREDICTED: uncharacterized protein LOC102583227 [Solanum tuberosum]	0.0246283	0.0239078	0.0550747	4.09762	0.296756	0	0.0680077	2.64087	0.922014	4.8347	-2.3906	0.30824	0.68288	FALSE	36.9494	4.9564	2.8982	0.14427	0.46352	FALSE	0	4.09376	#NAME?	0.087032	0.36992	FALSE	0.793298	0.478286	-0.48281	0.72999	0.97947	1	FALSE	56.4266	0.433368	7.0246	7.01e-15	3.61e-14	UP	0.310073	0.433317		1	1	FALSE
PGSC0003DMG400011009	Subtilisin inhibitor 1 [Source:PGSC_GENE%3BAcc:PGSC0003DMG400011009]	0.0208743	0.133084	0.462281	1.99249	0.0340282	0.318954	0.578782	0.839508	17.1076	1.20868	3.8231	0.23956	0.60366	FALSE	25.505	1.2391	4.3634	0.092701	0.36464	FALSE	8.18303	1.02344	2.9992	0.46361	0.81741	FALSE	14.5346	0.884351	2.2351	4.0387	0.0029664	0.0058205	UP	59.7765	0.805055	6.2143	7.12e-15	3.67e-14	UP	3.77331	0.801497		0.32904	0.44931	FALSE
PGSC0003DMG400029830	Glucan endo-1%2C3-beta-D-glucosidase [Source:PGSC_GENE%3BAcc:PGSC0003DMG400029830]	0.00413107	0.20589	0.0449886	0.795862	0.0733825	0.115525	0.807779	3.24352	54.6947	6.04338	3.178	0.12055	0.43608	FALSE	228.045	6.1955	5.202	0.00039105	0.0097941	UP	6.97377	5.1172	0.44658	1	1	FALSE	3.27922	0.406065	5.2019	3.0136	0.34834	0.46533	FALSE	55.4768	0.371687	7.2217	1.51e-14	7.66e-14	UP	13.5516	0.36818		0.2129	0.30914	FALSE
PGSC0003DMG400015918	Acyltransferase [Source:PGSC_GENE%3BAcc:PGSC0003DMG400015918]	0.0165555	0.140297	1.78286	1.78763	0	0.135309	0.938828	1.16968	71.7792	0	Inf	0.0050797	0.068156	FALSE	93.3198	0	Inf	0.00073039	0.015449	UP	9.08914	0	Inf	0.23593	0.60478	FALSE	146.718	1.83664	2.636	6.3198	1.55e-30	1.46e-29	UP	140.392	1.66993	6.3935	1.62e-14	8.17e-14	UP	10.4154	1.67557		0.057925	0.096437	FALSE
PGSC0003DMG400020017	Lichenase [Source:PGSC_GENE%3BAcc:PGSC0003DMG400020017]	0.025047	0.350955	2.95109	18.6135	0.165021	0.905712	2.23638	33.5694	121.257	10.8781	3.4786	0.034746	0.22283	FALSE	1898.45	11.1519	7.4114	7.18e-09	3.2e-06	UP	42.9259	9.21096	2.2204	0.27309	0.6515	FALSE	172.08	1.96959	3.3675	6.449	1.78e-29	1.6e-28	UP	1035.2	1.79502	9.1717	1.91e-14	9.61e-14	UP	18.4822	1.7908		0.001503	0.0031961	UP
PGSC0003DMG400019109	Delta DNA polymerase [Source:PGSC_GENE%3BAcc:PGSC0003DMG400019109]	0.00698098	0.0176752	0.179863	1.58624	0.0296365	0.13288	0.732178	2.01046	24.9616	1.20868	4.3682	0.14053	0.47243	FALSE	70.2464	1.2391	5.8251	0.0066073	0.071683	FALSE	3.89037	1.02344	1.9265	0.84991	1	FALSE	6.48527	0.33959	0.89225	4.2553	0.071089	0.11286	FALSE	54.7431	0.30914	7.4683	2e-14	1e-13	UP	0.576427	0.310563		1	1	FALSE
PGSC0003DMG400017713	LRR receptor-like serine/threonine-protein kinase [Source:PGSC_GENE%3BAcc:PGSC0003DMG400017713]	0.00175366	0.0275785	0.0117941	0.380879	0.0739567	0.0534753	0.0148187	0.0326645	2.79274	16.9215	-2.5991	0.13769	0.46708	FALSE	6.29986	17.3474	-1.4613	0.33268	0.69965	FALSE	8.97268	14.3282	-0.67524	0.58293	0.88341	FALSE	2.39058	0.478286	3.5392	2.3214	0.53428	0.66232	FALSE	73.5851	0.433368	7.4077	2.82e-14	1.4e-13	UP	5.03755	0.433317		0.11903	0.18504	FALSE
PGSC0003DMG400028254	SAUR family protein [Source:PGSC_GENE%3BAcc:PGSC0003DMG400028254]	0.0102057	0.0179128	0.867336	1.6035	0	0.0710283	1.14085	3.16554	37.5175	0	Inf	0.030238	0.20619	FALSE	106.804	0	Inf	0.00041217	0.010204	UP	2.025	0	Inf	0.8041	0.99821	FALSE	30.1529	0.478286	0.37744	5.9783	2.44e-07	7.04e-07	UP	53.2936	0.433368	6.9422	4.51e-14	2.21e-13	UP	0.562893	0.433317		1	1	FALSE
PGSC0003DMG400007858	Conserved gene of unknown function [Source:PGSC_GENE%3BAcc:PGSC0003DMG400007858]	0.011231	0.0232486	2.52154	3.79968	0.199503	0.24542	2.89097	3.34273	73.1651	6.04338	3.5977	0.062127	0.30648	FALSE	86.6468	6.1955	3.8059	0.022918	0.16081	FALSE	5.45734	5.1172	0.092842	1	1	FALSE	67.6118	0.406065	0.61245	7.3794	8.18e-07	2.27e-06	UP	97.1509	0.371687	8.03	4.6e-14	2.26e-13	UP	0.562893	0.36818		1	1	FALSE
PGSC0003DMG400003519	Conserved gene of unknown function [Source:PGSC_GENE%3BAcc:PGSC0003DMG400003519]	0.00894323	0.263184	0.573525	1.39297	0.0269401	0.766712	1.17483	1.1144	43.998	1.20868	5.1859	0.047231	0.26481	FALSE	42.7639	1.2391	5.109	0.028377	0.18355	FALSE	24.9224	1.02344	4.6059	0.11218	0.42501	FALSE	22.7671	0.478286	4.4434	5.5729	1.16e-05	2.91e-05	UP	52.7943	0.433368	6.9286	5.38e-14	2.63e-13	UP	9.42789	0.433317		0.010234	0.019479	UP
PGSC0003DMG400005580	Cytochrome P450 92B1 [Source:PGSC_GENE%3BAcc:PGSC0003DMG400005580]	0.172804	0.163403	3.70313	14.5283	4.51635	0.57517	22.2231	21.3312	2185.52	537.861	2.0227	0.042672	0.24847	FALSE	2170.29	551.4	1.9767	0.03535	0.21049	FALSE	49.6611	455.431	-3.197	0.00086953	0.021579	DOWN	390.273	24.5389	-0.51755	3.9913	9.96e-07	2.74e-06	UP	1460.2	22.2899	6.0336	6.05e-14	2.95e-13	UP	15.5371	22.2417		0.80355	0.91298	FALSE
PGSC0003DMG400002791	Conserved gene of unknown function [Source:PGSC_GENE%3BAcc:PGSC0003DMG400002791]	0.0126816	0.179187	1.59189	1.84572	0.107674	0.46032	2.32665	3.65206	87.0826	4.8347	4.1709	0.029607	0.20396	FALSE	140.623	4.9564	4.8264	0.0027108	0.038393	UP	14.9692	4.09376	1.8705	0.51728	0.84444	FALSE	63.1956	0.679179	3.3714	6.5399	8.2e-11	2.98e-10	UP	70.0313	0.618279	6.8236	6.86e-14	3.33e-13	UP	6.42813	0.621126		0.10038	0.15887	FALSE
PGSC0003DMG400013516	Polygalacturonase [Source:PGSC_GENE%3BAcc:PGSC0003DMG400013516]	0.0250695	0.0495923	5.14836	11.3335	15.4213	6.59592	36.8649	79.952	2678.1	1330.75	1.009	0.3043	0.67955	FALSE	5862.14	1364.25	2.1033	0.046783	0.24944	FALSE	409.316	1126.81	-1.461	0.078231	0.35515	FALSE	392.896	2.58083	0.54768	7.2502	1.09e-10	3.94e-10	UP	829.342	2.35348	8.461	7.26e-14	3.52e-13	UP	3.41952	2.33935		0.76293	0.88418	FALSE
Novel00311	--	0.00352497	0.00309347	0.378599	1.91452	0	0	0.11134	0.532071	10.481	0	Inf	0.23645	0.59922	FALSE	51.8627	0	Inf	0.0061181	0.068346	FALSE	0	0	NA	NA	NA	NA	38.139	0.478286	-0.62256	6.3172	8.04e-09	2.58e-08	UP	184.824	0.433368	8.7363	8.3e-14	4.01e-13	UP	0.281446	0.433317		1	1	FALSE
PGSC0003DMG400023547	ZPT2-14 [Source:PGSC_GENE%3BAcc:PGSC0003DMG400023547]	0.0102712	0.647088	2.06491	1.56091	0.0928211	3.57135	3.53616	5.35456	114.867	3.62603	4.9854	0.0082736	0.093401	FALSE	179.437	3.7173	5.5931	0.00051277	0.011859	UP	101.283	3.07032	5.0439	0.010204	0.10562	FALSE	71.3427	0.478286	5.5411	7.2207	2.06e-17	1.08e-16	UP	51.5677	0.433368	6.8947	1.26e-13	5.99e-13	UP	20.1759	0.433317		0.0025193	0.0052141	UP
PGSC0003DMG400004477	Lachrymatory-factor synthase [Source:PGSC_GENE%3BAcc:PGSC0003DMG400004477]	0.0181472	0.372302	0.413527	2.11541	1.4213	3.73064	2.60739	5.82577	96.0156	62.8511	0.61133	0.74635	0.97162	FALSE	219.291	64.4332	1.767	0.12658	0.43326	FALSE	118.921	53.2189	1.16	0.42933	0.79911	FALSE	16.1734	0.956571	3.9241	4.0796	0.0010985	0.0022763	UP	79.0305	0.866736	6.5107	2.03e-13	9.59e-13	UP	13.1558	0.866634		0.07353	0.1198	FALSE
PGSC0003DMG400006270	Pyruvate decarboxylase [Source:PGSC_GENE%3BAcc:PGSC0003DMG400006270]	0.0105298	1.08821	0.245378	0.968055	0.0186291	3.68365	0.227351	0.186666	24.8865	2.41735	3.3639	0.21603	0.57748	FALSE	20.9133	2.4782	3.0771	0.21418	0.5616	FALSE	342.058	2.04688	7.3847	3.32e-05	0.0020584	UP	28.1647	1.63001	6.2513	4.1109	1.73e-05	4.27e-05	UP	106.137	1.48588	6.1585	4.2e-13	1.94e-12	UP	112.76	1.48024		3.1e-26	2.67e-25	UP
PGSC0003DMG400009080	Triacylglycerol lipase [Source:PGSC_GENE%3BAcc:PGSC0003DMG400009080]	0.00935381	1.0035	1.21938	1.36213	0.0281769	1.52821	1.21714	0.980589	43.3604	1.20868	5.1649	0.049081	0.27091	FALSE	36.0812	1.2391	4.8639	0.043128	0.23764	FALSE	47.4195	1.02344	5.534	0.0305	0.20755	FALSE	46.2551	0.478286	6.311	6.5956	1.96e-11	7.44e-11	UP	49.3558	0.433368	6.8315	4.46e-13	2.06e-12	UP	34.4039	0.433317		0.00086341	0.0018871	UP
PGSC0003DMG400028633	WRKYd transcription factor [Source:PGSC_GENE%3BAcc:PGSC0003DMG400028633]	0.00726411	1.57276	1.47175	1.23903	0	3.28349	6.49804	3.35306	254.248	0	Inf	1.5e-05	0.0012778	UP	134.037	0	Inf	0.00013217	0.0043527	UP	111.879	0	Inf	0.0008081	0.020584	UP	60.9776	0.406065	7.32	7.2304	7.36e-15	3.38e-14	UP	49.0748	0.371687	7.0448	5.78e-13	2.65e-12	UP	58.832	0.36818		1.47e-15	7.56e-15	UP
PGSC0003DMG400002171	Glutathione S-transferase T2 [Source:PGSC_GENE%3BAcc:PGSC0003DMG400002171]	0.0113858	0.224891	0.852047	1.3626	0.080901	2.51737	1.78681	3.02858	89.122	4.8347	4.2043	0.026532	0.19237	FALSE	155.337	4.9564	4.97	0.0016154	0.02686	UP	108.898	4.09376	4.7334	0.012235	0.11949	FALSE	45.0522	0.81213	3.8668	5.7937	3.25e-10	1.14e-09	UP	68.7396	0.743373	6.5309	8.19e-13	3.71e-12	UP	10.743	0.736359		0.010706	0.020308	UP
PGSC0003DMG400002943	Microsomal omega-6-desaturase [Source:PGSC_GENE%3BAcc:PGSC0003DMG400002943]	0.0124856	0.86963	2.02303	3.56666	0.633914	5.32474	19.4016	12.9585	1476.8	58.0164	4.6699	4.42e-05	0.0026557	UP	1013.22	59.4768	4.0905	0.00010961	0.0037812	UP	352.279	49.1251	2.8422	0.029028	0.20124	FALSE	163.932	1.36264	5.6857	6.9106	4.76e-05	0.00011313	UP	275.389	1.23842	7.7968	9.19e-13	4.16e-12	UP	63.5596	1.23481		4.55e-15	2.29e-14	UP
PGSC0003DMG400040260	Glucan endo-1%2C3-beta-glucosidase%2C basic isoform 1 [Source:PGSC_GENE%3BAcc:PGSC0003DMG400040260]	0.0321188	0.280736	1.61624	8.0596	0.186403	0.714073	1.17214	16.455	69.0497	13.2954	2.3767	0.18735	0.53578	FALSE	1007.06	13.6301	6.2072	3.31e-07	5.3e-05	UP	36.5083	11.2578	1.6973	0.40987	0.78382	FALSE	101.966	2.73102	2.69	5.2225	2.11e-20	1.27e-19	UP	484.956	2.47598	7.6137	1.18e-12	5.3e-12	UP	15.9856	2.47715		0.0073818	0.01436	UP
PGSC0003DMG400039124	Bax inhibitor 1 [Source:PGSC_GENE%3BAcc:PGSC0003DMG400039124]	0.0095288	0.0462502	0.755731	1.33825	0	0.044263	1.20169	2.37473	41.751	0	Inf	0.0231	0.17776	FALSE	85.4565	0	Inf	0.0010474	0.019786	UP	1.37554	0	Inf	0.96483	1	FALSE	28.1407	0.478286	1.8391	5.8786	5.05e-07	1.42e-06	UP	47.6219	0.433368	6.7799	1.25e-12	5.6e-12	UP	1.55037	0.433317		0.70409	0.83044	FALSE
PGSC0003DMG400023039	Mutt domain protein [Source:PGSC_GENE%3BAcc:PGSC0003DMG400023039]	0.0138789	1.94103	6.08704	4.81808	0.29412	6.36808	7.96498	11.1771	354.979	15.7128	4.4977	0.0010982	0.024039	UP	511.888	16.1083	4.99	5.17e-05	0.0022058	UP	247.812	13.3047	4.2192	0.0051521	0.068283	FALSE	287.535	0.884351	6.6911	8.3449	2.63e-30	2.45e-29	UP	217.206	0.805055	8.0758	1.59e-12	7.06e-12	UP	82.8171	0.801497		3.18e-20	2.07e-19	UP
PGSC0003DMG400026457	Conserved gene of unknown function [Source:PGSC_GENE%3BAcc:PGSC0003DMG400026457]	0.0168017	0.0545633	1.55839	1.96898	0.133952	0.196085	1.90679	1.98963	86.0018	7.25205	3.5679	0.052992	0.28054	FALSE	92.203	7.4346	3.6325	0.02546	0.17138	FALSE	7.53804	6.14064	0.2958	1	1	FALSE	74.6352	1.08524	1.2552	6.1038	2.65e-16	1.31e-15	UP	90.3781	0.989966	6.5124	1.91e-12	8.44e-12	UP	2.3614	0.989306		0.73993	0.86514	FALSE
Novel03393	Chain A, Structure Of Green-type Rubisco Activase From Tobacco>gi|356624733|pdb|3ZW6|A Chain A, Model Of Hexameric Aaa Domain Arrangement Of Green-Type Rubisco Activase From Tobacco.>gi|356624734|pdb|3ZW6|B Chain B, Model Of Hexameric Aaa Domain Arrangement Of Green-Type Rubisco Activase From Tobacco.>gi|356624735|pdb|3ZW6|C Chain C, Model Of Hexameric Aaa Domain Arrangement Of Green-Type Rubisco…	0.0126012	0.770356	8.48648	2.46359	0	0.0420346	2.61225	0.991896	49.142	0	Inf	0.015373	0.13929	FALSE	19.2282	0	Inf	0.068957	0.3101	FALSE	0.694294	0	Inf	1	1	FALSE	169.588	0.33959	5.484	8.964	8.55e-40	1.14e-38	UP	47.1303	0.30914	7.2523	1.92e-12	8.47e-12	UP	13.8994	0.310563		0.00080417	0.001764	UP
Novel00430	PREDICTED: latent-transforming growth factor beta-binding protein 4-like [Solanum tuberosum]	0.00616046	0.630645	0.476202	1.76556	0.259804	4.25901	11.2661	6.79326	611.13	16.9215	5.1746	6.37e-05	0.0034102	UP	378.727	17.3474	4.4484	0.00036164	0.0092312	UP	200.421	14.3282	3.8061	0.012393	0.12055	FALSE	27.4453	0.478286	6.2417	5.8425	1.29e-06	3.53e-06	UP	97.0697	0.433368	7.8073	2.66e-12	1.16e-11	UP	32.7901	0.433317		9.41e-09	3.21e-08	UP
PGSC0003DMG400026575	Class III peroxidase [Source:PGSC_GENE%3BAcc:PGSC0003DMG400026575]	0.0881741	0.389741	14.2232	16.8031	0.0738238	0.397111	13.9493	4.00898	753.517	4.8347	7.2841	4.49e-07	0.00011023	UP	223.801	4.9564	5.4968	0.00026518	0.0073308	UP	18.8792	4.09376	2.2053	0.41524	0.78772	FALSE	824.181	6.8854	1.709	6.9033	9.01e-30	8.17e-29	UP	928.264	6.2538	7.2137	4.88e-12	2.1e-11	UP	20.3981	6.2392		0.14795	0.22438	FALSE
PGSC0003DMG400027767	Alcohol dehydrogenase [Source:PGSC_GENE%3BAcc:PGSC0003DMG400027767]	0.00651504	0.0360583	0.623225	0.866947	1.62892	0.0934365	0.904477	0.788061	46.4477	100.32	-1.1109	0.30931	0.683	FALSE	41.4966	102.845	-1.3094	0.21005	0.55678	FALSE	4.08723	84.9455	-4.3773	0.0024597	0.042697	DOWN	33.9497	0.478286	2.0327	6.1494	2.16e-08	6.73e-08	UP	45.1775	0.433368	6.7039	5.58e-12	2.39e-11	UP	1.773	0.433317		0.6211	0.75631	FALSE
PGSC0003DMG400024240	Gene of unknown function [Source:PGSC_GENE%3BAcc:PGSC0003DMG400024240]	0.0041783	0.0479785	0.753186	0.650689	0.0445329	0.230424	2.44605	3.97353	165.164	3.62603	5.5094	0.0019888	0.035563	UP	277.474	3.7173	6.222	4.54e-05	0.0019901	UP	13.8254	3.07032	2.1709	0.48822	0.82229	FALSE	54.2581	0.406065	3.0844	7.062	3.32e-13	1.39e-12	UP	44.8337	0.371687	6.9144	7.95e-12	3.37e-11	UP	3.12298	0.36818		0.31641	0.43461	FALSE
PGSC0003DMG400007405	Acyl CoA reductase [Source:PGSC_GENE%3BAcc:PGSC0003DMG400007405]	0.0846128	0.520495	14.1602	9.73267	0.450541	21.3524	23.563	38.3076	2054.91	47.1383	5.446	5.96e-06	0.00069652	UP	3430.68	48.3249	6.1496	5.86e-07	8.25e-05	UP	1634.56	39.9142	5.3559	2.53e-05	0.001689	UP	1309.01	10.5649	2.1807	6.9531	2.81e-05	6.81e-05	UP	859.261	9.66026	6.4749	1.1e-11	4.64e-11	UP	43.5028	9.59515		0.26216	0.37025	FALSE
PGSC0003DMG400009724	Conserved gene of unknown function [Source:PGSC_GENE%3BAcc:PGSC0003DMG400009724]	0.00235651	0.198764	0.878653	0.531725	0.150696	0.107735	0.521693	0.355449	62.3043	21.7562	1.5179	0.40927	0.7614	FALSE	43.9422	22.3038	0.97832	0.60465	0.90019	FALSE	11.3018	18.4219	-0.70487	0.54035	0.86044	FALSE	112.213	0.406065	5.9593	8.1103	7.01e-27	5.66e-26	UP	64.8812	0.371687	7.4476	1.42e-11	5.94e-11	UP	22.9076	0.36818		3.84e-06	1.06e-05	UP
PGSC0003DMG400001402	Conserved gene of unknown function [Source:PGSC_GENE%3BAcc:PGSC0003DMG400001402]	0.0139281	0.883372	0.925145	1.35339	0.0536092	1.03037	1.07146	1.43185	120.859	7.25205	4.0588	0.018742	0.15719	FALSE	165.658	7.4346	4.4778	0.0026891	0.038293	UP	100.815	6.14064	4.0372	0.026111	0.18847	FALSE	110.675	2.24699	5.5501	5.6222	8.2e-11	2.98e-10	UP	154.518	2.04348	6.2406	1.68e-11	6.97e-11	UP	95.4094	2.03631		2.19e-21	1.5e-20	UP
PGSC0003DMG400011178	Reticulon B21 [Source:PGSC_GENE%3BAcc:PGSC0003DMG400011178]	0.00241714	0.00222129	0.0557097	0.306829	0.0873752	0.0511635	0.197611	0.622555	27.3097	14.5041	0.91295	0.76133	0.9794	FALSE	88.6278	14.8692	2.5754	0.093555	0.3667	FALSE	6.25338	12.2813	-0.97375	0.49512	0.82789	FALSE	8.18598	0.478286	-0.5548	4.0972	0.032163	0.05448	FALSE	43.0906	0.433368	6.6356	1.78e-11	7.38e-11	UP	0.29498	0.433317		1	1	FALSE
PGSC0003DMG400007375	Chlorophyll a/b-binding protein PS II-Type I [Source:PGSC_GENE%3BAcc:PGSC0003DMG400007375]	0.0451602	0.27235	0.981321	4.35945	0.270684	0.800173	4.51999	13.8006	283.145	20.5475	3.7845	0.0060175	0.076156	FALSE	895.643	21.0647	5.41	3.83e-06	0.00033748	UP	43.9985	17.3985	1.3385	0.51562	0.84293	FALSE	65.8987	4.08791	2.1576	4.0108	1.36e-07	4.01e-07	UP	279.93	3.71527	6.2355	2.33e-11	9.6e-11	UP	16.5282	3.70444		0.23159	0.3326	FALSE
Novel00946	PREDICTED: uncharacterized protein LOC104106668 [Nicotiana tomentosiformis]>gi|697119217|ref|XP_009613558.1| PREDICTED: uncharacterized protein LOC104106668 [Nicotiana tomentosiformis]>gi|697119219|ref|XP_009613559.1| PREDICTED: uncharacterized protein LOC104106668 [Nicotiana tomentosiformis]	0.0127365	0.444383	1.99626	2.00568	0	0.916546	1.47949	0.688345	32.6223	0	Inf	0.039459	0.23755	FALSE	15.7674	0	Inf	0.098838	0.3784	FALSE	17.7145	0	Inf	0.092829	0.38392	FALSE	47.1575	0.406065	4.6854	6.8596	1.31e-11	4.99e-11	UP	45.2644	0.371687	6.9281	2.44e-11	1e-10	UP	9.47317	0.36818		0.0103	0.019595	UP
Novel02989	PREDICTED: G-type lectin S-receptor-like serine/threonine-protein kinase SD2-5-like [Solanum tuberosum]	0.0122895	0.222832	1.51997	2.14298	1.51302	1.42389	7.94296	3.96984	152.408	35.0516	2.1204	0.13757	0.46708	FALSE	78.4437	35.9339	1.1263	0.44619	0.78811	FALSE	24.195	29.6798	-0.29477	0.69797	0.94758	FALSE	31.1687	0.33959	3.7305	6.5202	8.27e-05	0.00019209	UP	41.9547	0.30914	7.0844	3.45e-11	1.4e-10	UP	4.12243	0.310563		0.19822	0.29054	FALSE
PGSC0003DMG400010422	Pentatricopeptide repeat-containing protein [Source:PGSC_GENE%3BAcc:PGSC0003DMG400010422]	0.00346162	0.00901706	0.314835	0.825764	0.044087	0.152994	0.878397	1.19301	59.6563	3.62603	4.0402	0.058912	0.29833	FALSE	84.0711	3.7173	4.4993	0.012116	0.10741	FALSE	9.21155	3.07032	1.5851	0.71058	0.9555	FALSE	22.9038	0.33959	0.92954	6.0756	1.05e-05	2.64e-05	UP	57.5658	0.30914	7.5408	3.49e-11	1.42e-10	UP	0.59152	0.310563		1	1	FALSE
PGSC0003DMG400002696	Purple acid phosphatase 20 [Source:PGSC_GENE%3BAcc:PGSC0003DMG400002696]	0.00311085	0.224478	0.339539	0.549187	0.0132066	11.4374	3.00205	2.226	229.142	1.20868	7.5667	9.89e-05	0.0046756	UP	175.167	1.2391	7.1433	0.0001278	0.0042472	UP	761.506	1.02344	9.5393	1.05e-07	3.01e-05	UP	27.4759	0.33959	5.7248	6.3382	7.53e-07	2.09e-06	UP	42.4282	0.30914	7.1006	4.85e-11	1.95e-10	UP	16.4245	0.310563		0.0047532	0.0094654	UP
PGSC0003DMG400006730	2-isopropylmalate synthase A [Source:PGSC_GENE%3BAcc:PGSC0003DMG400006730]	0.0105517	0	0.251394	1.2838	0	0.0600975	0.380027	1.5209	11.9246	0	Inf	0.20471	0.56269	FALSE	49.6595	0	Inf	0.0073076	0.076448	FALSE	1.70312	0	Inf	0.87689	1	FALSE	8.45589	0.478286	#NAME?	4.144	0.025186	0.043348	UP	41.2355	0.433368	6.5721	5.63e-11	2.26e-10	UP	0	0.433317		0.97327	1	FALSE
PGSC0003DMG400016800	R2r3-myb transcription factor [Source:PGSC_GENE%3BAcc:PGSC0003DMG400016800]	0.00815565	0.0554194	0.159901	1.05527	0.0737029	0.0460229	0.599294	6.81959	24.5657	3.62603	2.7602	0.29331	0.66639	FALSE	288.178	3.7173	6.2766	3.83e-05	0.0017705	UP	1.65829	3.07032	-0.8887	0.65025	0.92387	FALSE	6.95419	0.478286	2.3245	3.8619	0.052938	0.086243	FALSE	43.8384	0.433368	6.6605	6.82e-11	2.72e-10	UP	2.17051	0.433317		0.55345	0.6883	FALSE
PGSC0003DMG400023833	Microsomal oleic acid desaturase [Source:PGSC_GENE%3BAcc:PGSC0003DMG400023833]	0.0382724	0.303946	4.29403	8.48246	0	0.0993963	2.96317	6.31172	215.329	0	Inf	3.87e-05	0.0024796	UP	473.309	0	Inf	3.92e-08	1.18e-05	UP	6.40732	0	Inf	0.3415	0.7231	FALSE	334.223	4.01569	2.5523	6.379	1.13e-34	1.25e-33	UP	629.34	3.65359	7.4284	1.04e-10	4.09e-10	UP	21.3468	3.6393		0.0026472	0.0054664	UP
Novel01245	PREDICTED: putative cyclin-A3-1-like [Solanum tuberosum]	0.00501029	0.0974815	3.62728	0.835169	0.106351	0.157351	1.25933	0.894642	59.5696	6.04338	3.3011	0.10018	0.39652	FALSE	43.3472	6.1955	2.8066	0.13405	0.44497	FALSE	6.45477	5.1172	0.33501	1	1	FALSE	182.352	0.33959	3.8313	9.0687	2.46e-42	3.57e-41	UP	40.1379	0.30914	7.0206	1.15e-10	4.52e-10	UP	4.42053	0.310563		0.16973	0.25375	FALSE
PGSC0003DMG400014576	Receptor kinase [Source:PGSC_GENE%3BAcc:PGSC0003DMG400014576]	0.0076101	0.0383463	0.417849	0.630305	0.0114621	0.00379703	0.373441	0.367713	32.6382	1.20868	4.7551	0.085517	0.36171	FALSE	32.9284	1.2391	4.732	0.052489	0.2667	FALSE	0.282744	1.02344	-1.8559	0.7727	0.98313	FALSE	38.9897	0.956571	1.8993	5.3491	8.64e-09	2.77e-08	UP	56.1013	0.866736	6.0163	1.64e-10	6.36e-10	UP	3.23281	0.866634		0.41667	0.54801	FALSE
PGSC0003DMG400007850	Gene of unknown function [Source:PGSC_GENE%3BAcc:PGSC0003DMG400007850]	0.0182506	0.671221	2.05768	9.82504	0.38484	0.449239	4.73778	6.72171	87.1094	8.46073	3.364	0.060584	0.3023	FALSE	126.347	8.6737	3.8646	0.010983	0.10089	FALSE	7.18085	7.16408	0.0033739	0.85996	1	FALSE	40.0257	0.478286	4.7661	6.3869	8.77e-10	2.99e-09	UP	182.177	0.433368	8.7155	2.25e-10	8.63e-10	UP	11.7907	0.433317		0.017896	0.03288	UP
Novel00691	--	0.0095205	0.370892	0.68159	1.28376	0.0338236	0.617828	1.23757	1.13775	37.1586	1.20868	4.9422	0.070932	0.32988	FALSE	34.7833	1.2391	4.811	0.049142	0.25635	FALSE	16.0667	1.02344	3.9726	0.20754	0.56842	FALSE	21.5462	0.406065	4.8451	5.7296	2.27e-05	5.54e-05	UP	38.8572	0.371687	6.708	2.72e-10	1.04e-09	UP	10.5823	0.36818		0.0053522	0.010601	UP
Novel00997	PREDICTED: uncharacterized protein LOC104113598, partial [Nicotiana tomentosiformis]	0.0122599	0.0140362	0.456541	1.64892	0.0871121	0	0.900366	3.74707	20.7099	2.41735	3.0988	0.27761	0.64844	FALSE	88.804	2.4782	5.1633	0.0055913	0.064244	FALSE	0	2.04688	#NAME?	0.20235	0.56045	FALSE	11.2199	0.406065	-0.2478	4.7882	0.041368	0.068682	FALSE	38.6565	0.371687	6.7005	2.72e-10	1.04e-09	UP	0.310073	0.36818		1	1	FALSE
Novel01039	PREDICTED: glycine-rich cell wall structural protein-like [Solanum tuberosum]	0.0134087	0.200765	3.09916	2.14485	0	0	0	0	0	0	NA	NA	NA	NA	0	0	NA	NA	NA	NA	0	0	NA	NA	NA	NA	58.1662	0.33959	3.4551	7.4202	2.27e-09	7.55e-09	UP	38.5205	0.30914	6.9612	2.92e-10	1.11e-09	UP	3.40598	0.310563		0.37048	0.49716	FALSE
PGSC0003DMG400000919	Nodulin family protein [Source:PGSC_GENE%3BAcc:PGSC0003DMG400000919]	0.0106729	0.455314	0.756675	2.00892	0.04531	0.89487	0.207138	3.3932	13.7727	3.62603	1.9254	0.55531	0.86834	FALSE	230.292	3.7173	5.9531	0.00012963	0.0042881	UP	51.5195	3.07032	4.0687	0.060876	0.30819	FALSE	53.5982	1.01877	4.9651	5.7173	0.00040974	0.00088777	UP	135.638	0.927419	7.1923	2.95e-10	1.12e-09	UP	29.1008	0.931689		3.75e-05	9.45e-05	UP
Novel02993	PREDICTED: uncharacterized protein LOC101250708 [Solanum lycopersicum]	0.0304507	0.719381	2.75402	3.59179	0.0917281	2.39705	0.732189	0.441972	8.06764	1.20868	2.7387	0.53278	0.8512	FALSE	4.9308	1.2391	1.9925	0.71563	0.95648	FALSE	22.8526	1.02344	4.4809	0.12888	0.4539	FALSE	32.1279	0.478286	4.1283	6.0698	0.00029113	0.00064078	UP	39.9433	0.433368	6.5262	3.86e-10	1.45e-09	UP	7.57787	0.433317		0.028615	0.050794	FALSE
PGSC0003DMG400025265	Gene of unknown function [Source:PGSC_GENE%3BAcc:PGSC0003DMG400025265]	0.235076	1.62673	4.08701	22.1077	0.428647	1.64002	2.227	6.71014	42.2324	9.6694	2.1269	0.30996	0.68356	FALSE	129.814	9.9128	3.711	0.013383	0.11376	FALSE	26.5786	8.18752	1.6988	0.46256	0.81741	FALSE	81.6491	6.32487	2.3522	3.6903	0.023384	0.040433	UP	420.895	5.75775	6.1918	3.91e-10	1.47e-09	UP	29.3113	5.74067		0.0028736	0.0059017	UP
PGSC0003DMG400012972	Conserved gene of unknown function [Source:PGSC_GENE%3BAcc:PGSC0003DMG400012972]	0.0078308	0.04407	1.46661	0.857104	0	0	0	0	0	0	NA	NA	NA	NA	0	0	NA	NA	NA	NA	0	0	NA	NA	NA	NA	66.4529	0.478286	2.0558	7.1183	1.46e-13	6.24e-13	UP	37.087	0.433368	6.4192	6.62e-10	2.45e-09	UP	1.80163	0.433317		0.61804	0.75332	FALSE
PGSC0003DMG400019120	Oxidoreductase [Source:PGSC_GENE%3BAcc:PGSC0003DMG400019120]	0.0145319	3.95383	7.62573	4.28404	0.0281065	42.4617	20.9249	5.02746	752.358	1.20868	9.2818	3.53e-08	2.03e-05	UP	185.164	1.2391	7.2234	9.08e-05	0.0033004	UP	1322.75	1.02344	10.336	4.38e-09	2.86e-06	UP	290.006	0.745655	7.6445	8.6034	2.4e-63	6.46e-62	UP	155.776	0.680826	7.838	6.93e-10	2.56e-09	UP	135.812	0.678743		4.36e-19	2.69e-18	UP
PGSC0003DMG400022941	2-oxoglutarate-dependent dioxygenase [Source:PGSC_GENE%3BAcc:PGSC0003DMG400022941]	0.0044234	0.200439	0.629591	0.563118	0.141436	0.503616	2.18848	1.80177	140.51	10.8781	3.6912	0.02208	0.17306	FALSE	118.714	11.1519	3.4121	0.022225	0.15812	FALSE	28.0692	9.21096	1.6076	0.48858	0.82262	FALSE	42.7966	0.406065	5.0652	6.7196	5.54e-07	1.56e-06	UP	36.5917	0.371687	6.6213	8.67e-10	3.18e-09	UP	12.3262	0.36818		0.05377	0.090155	FALSE
PGSC0003DMG400022764	Glutamate decarboxylase isoform3 [Source:PGSC_GENE%3BAcc:PGSC0003DMG400022764]	0.00517328	2.11435	1.60171	0.621332	0.219622	7.13203	4.44473	0.453342	405.968	24.1735	4.0699	0.0017404	0.03246	UP	42.5005	24.782	0.77819	0.69563	0.94586	FALSE	566.713	20.4688	4.7911	0.00036831	0.011735	UP	156.055	0.679179	8.225	7.844	1.07e-08	3.42e-08	UP	57.7094	0.618279	6.5444	1.02e-09	3.71e-09	UP	185.841	0.621126		6.08e-30	6.06e-29	UP
PGSC0003DMG400008124	Structural constituent of cell wall [Source:PGSC_GENE%3BAcc:PGSC0003DMG400008124]	0.0094405	1.19259	1.55091	1.00505	0	0.165	0.636474	0.269626	22.5894	0	Inf	0.078455	0.34548	FALSE	9.846	0	Inf	0.20214	0.54741	FALSE	5.12976	0	Inf	0.4368	0.80501	FALSE	58.3221	0.478286	6.5451	6.93	3.44e-14	1.52e-13	UP	36.0902	0.433368	6.3799	1.09e-09	3.97e-09	UP	40.466	0.433317		9.88e-11	3.88e-10	UP
PGSC0003DMG400028959	Multicopper oxidase [Source:PGSC_GENE%3BAcc:PGSC0003DMG400028959]	0.0148276	0.0928157	0.673887	1.27229	0.196427	0.772625	2.09624	1.00523	213.963	24.1735	3.1459	0.024578	0.18443	FALSE	105.753	24.782	2.0933	0.13672	0.45038	FALSE	68.7641	20.4688	1.7482	0.31111	0.69242	FALSE	73.3673	2.17623	2.199	5.0752	4.04e-14	1.78e-13	UP	132.134	1.97907	6.061	1.51e-09	5.47e-09	UP	9.11938	1.98613		0.12662	0.19535	FALSE
PGSC0003DMG400004975	Phosphopentothenoylcysteine decarboxylase [Source:PGSC_GENE%3BAcc:PGSC0003DMG400004975]	0.00539243	0.358477	0.676447	0.669995	0.0957887	0.601277	0.482436	0.272204	25.3601	6.04338	2.0691	0.40367	0.7614	FALSE	14.707	6.1955	1.2472	0.66676	0.93648	FALSE	27.4299	5.1172	2.4223	0.29197	0.66936	FALSE	37.7417	0.406065	5.6167	6.5383	2.45e-09	8.13e-09	UP	35.7805	0.371687	6.5889	1.65e-09	5.93e-09	UP	18.0654	0.36818		6.28e-05	0.00015491	UP
PGSC0003DMG400040421	Ubiquitin-protein ligase [Source:PGSC_GENE%3BAcc:PGSC0003DMG400040421]	0.00481352	0.114226	0.265102	0.500551	0.0579999	0	0.0718033	0.116515	4.9412	4.8347	0.031434	1	1	FALSE	8.33372	4.9564	0.74967	0.93386	1	FALSE	0	4.09376	#NAME?	0.087032	0.36992	FALSE	19.5401	0.478286	4.1307	5.3524	5.9e-05	0.00013919	UP	35.2811	0.433368	6.3472	1.93e-09	6.91e-09	UP	7.59049	0.433317		0.053448	0.089689	FALSE
PGSC0003DMG400016125	UDP-rhamnose:rhamnosyltransferase [Source:PGSC_GENE%3BAcc:PGSC0003DMG400016125]	0.00390721	0.110057	0.23656	0.398251	0.164778	0.508389	0.790052	1.11896	67.6575	16.9215	1.9994	0.2711	0.64099	FALSE	98.3782	17.3474	2.5036	0.088866	0.35798	FALSE	37.7181	14.3282	1.3964	0.51153	0.84044	FALSE	21.4997	0.478286	4.3813	5.4903	2.62e-05	6.37e-05	UP	34.6184	0.433368	6.3198	3.24e-09	1.14e-08	UP	9.03038	0.433317		0.012518	0.023501	UP
Novel02601	PREDICTED: glutamate decarboxylase-like [Solanum tuberosum]	0.0116043	0.195481	0.289724	1.76027	0.179553	0.874732	0.507981	0.622688	22.7316	9.6694	1.2332	0.65382	0.93072	FALSE	28.5304	9.9128	1.5251	0.44742	0.78929	FALSE	33.8825	8.18752	2.049	0.34589	0.72725	FALSE	13.8125	0.745655	3.6315	4.2113	0.023608	0.040787	UP	79.9745	0.680826	6.8761	4.08e-09	1.43e-08	UP	8.41179	0.678743		0.036414	0.063255	FALSE
PGSC0003DMG400002707	Gene of unknown function [Source:PGSC_GENE%3BAcc:PGSC0003DMG400002707]	0.0103471	0.0181609	0.678933	1.18703	0	0.0117864	1.12662	0.600408	36.6767	0	Inf	0.03135	0.21018	FALSE	19.9316	0	Inf	0.066544	0.30435	FALSE	0.340624	0	Inf	1	1	FALSE	23.2775	0.478286	0.37744	5.6049	7.12e-06	1.83e-05	UP	38.8433	0.433368	6.4859	4.83e-09	1.68e-08	UP	0.562893	0.433317		1	1	FALSE
Novel01841	PREDICTED: uncharacterized protein LOC102589523 [Solanum tuberosum]	0.00832531	0.0918955	0.522942	0.82035	0.0250787	0.30807	0.320559	0.276443	12.7624	1.20868	3.4004	0.34135	0.71544	FALSE	11.3538	1.2391	3.1958	0.32964	0.69808	FALSE	10.8698	1.02344	3.4088	0.35733	0.73833	FALSE	22.3012	0.478286	3.0308	5.5431	1.59e-05	3.96e-05	UP	33.4785	0.433368	6.2715	6.47e-09	2.23e-08	UP	3.54132	0.433317		0.27538	0.38638	FALSE
PGSC0003DMG400000060	Transferase%2C transferring glycosyl groups [Source:PGSC_GENE%3BAcc:PGSC0003DMG400000060]	0.00376484	0.30679	1.87933	0.520761	0.111881	1.78974	3.07287	3.10314	193.821	8.46073	4.5178	0.0043162	0.060989	FALSE	201.084	8.6737	4.535	0.0016527	0.027339	UP	99.0137	7.16408	3.7888	0.034059	0.2222	FALSE	125.552	0.33959	5.8996	8.5303	0.00021017	0.00046961	UP	33.2679	0.30914	6.7497	6.79e-09	2.34e-08	UP	18.5393	0.310563		0.00013228	0.00031542	UP
PGSC0003DMG400006451	EPIDERMAL PATTERNING FACTOR 4 [Source:PGSC_GENE%3BAcc:PGSC0003DMG400006451]	0.0108217	0.387057	0.727569	1.23589	0.192232	3.02766	1.37524	2.02398	36.0052	6.04338	2.5748	0.25831	0.62732	FALSE	54.1444	6.1955	3.1275	0.082731	0.34314	FALSE	68.9368	5.1172	3.7518	0.05547	0.29099	FALSE	20.2429	0.406065	4.7214	5.6396	5.19e-05	0.00012297	UP	32.8504	0.371687	6.4657	8.88e-09	3.03e-08	UP	9.71246	0.36818		0.0088582	0.017028	UP
PGSC0003DMG400005986	Conserved gene of unknown function [Source:PGSC_GENE%3BAcc:PGSC0003DMG400005986]	0.0094167	0.797732	0.809335	1.85269	0	13.0392	4.58201	4.51483	162.636	0	Inf	0.00017057	0.0066913	UP	164.851	0	Inf	4.54e-05	0.0019901	UP	401.992	0	Inf	1.37e-06	0.00021005	UP	30.4963	0.478286	5.968	5.9946	1.42e-07	4.16e-07	UP	66.5927	0.433368	7.2636	1.01e-08	3.44e-08	UP	27.1237	0.433317		3.04e-07	9.2e-07	UP
PGSC0003DMG400000725	2-hydroxyacid dehydrogenase [Source:PGSC_GENE%3BAcc:PGSC0003DMG400000725]	0.00410785	0	0.10545	0.464727	0.102158	0.0638907	0.278377	0.311116	19.1246	8.46073	1.1766	0.70617	0.95216	FALSE	22.0932	8.6737	1.3489	0.55206	0.86469	FALSE	3.8064	7.16408	-0.91235	0.5376	0.85898	FALSE	7.71503	0.406065	#NAME?	4.2479	0.058583	0.094684	FALSE	32.5918	0.371687	6.4543	1.05e-08	3.55e-08	UP	0	0.36818		0.97327	1	FALSE
PGSC0003DMG400009037	Multidrug resistance protein ABC transporter family protein [Source:PGSC_GENE%3BAcc:PGSC0003DMG400009037]	0.00516664	1.14632	2.11456	1.68311	0.201912	8.77145	3.58391	6.81594	197.191	13.2954	3.8906	0.0099407	0.10556	FALSE	384.026	13.6301	4.8163	0.00017779	0.0053963	UP	421.192	11.2578	5.2255	0.0003497	0.011353	UP	123.006	0.406065	7.3549	8.2428	0.00022267	0.00049663	UP	93.5547	0.371687	7.9756	1.28e-08	4.33e-08	UP	60.2699	0.36818		6.16e-16	3.25e-15	UP
PGSC0003DMG402014514	PERK1 kinase [Source:PGSC_GENE%3BAcc:PGSC0003DMG402014514]	0.00352941	0.541814	0.190835	0.417185	0.552853	1.16213	1.15964	1.23593	110.091	62.8511	0.80868	0.61583	0.90883	FALSE	119.682	64.4332	0.89333	0.49804	0.82564	FALSE	95.7398	53.2189	0.84718	0.60653	0.89909	FALSE	19.1857	0.478286	6.8266	5.326	7.41e-05	0.00017304	UP	40.1045	0.433368	6.532	1.54e-08	5.17e-08	UP	49.1847	0.433317		5.05e-13	2.27e-12	UP
PGSC0003DMG400025843	Anthranilate N-benzoyltransferase protein [Source:PGSC_GENE%3BAcc:PGSC0003DMG400025843]	0.00494794	0.00932365	0.0391928	0.861289	0	0.0261411	0.0966085	0.447078	9.25556	0	Inf	0.27774	0.64844	FALSE	44.0862	0	Inf	0.010117	0.09556	FALSE	2.1659	0	Inf	0.74623	0.97343	FALSE	3.98826	0.679179	0.46588	2.5539	0.36211	0.48024	FALSE	83.997	0.618279	7.0859	1.71e-08	5.74e-08	UP	0.857873	0.621126		1	1	FALSE
PGSC0003DMG400012725	Conserved gene of unknown function [Source:PGSC_GENE%3BAcc:PGSC0003DMG400012725]	0.00691294	0.0508226	0.832258	0.645532	0	0.035468	0.499407	0.39696	24.3378	0	Inf	0.070175	0.32784	FALSE	19.7031	0	Inf	0.06731	0.30625	FALSE	1.4716	0	Inf	0.87876	1	FALSE	42.7438	0.478286	2.4452	6.4817	7.97e-06	2.03e-05	UP	31.6803	0.433368	6.1918	1.75e-08	5.86e-08	UP	2.35984	0.433317		0.51892	0.65536	FALSE
PGSC0003DMG400016167	Wiscott-Aldrich syndrome%2C C-terminal [Source:PGSC_GENE%3BAcc:PGSC0003DMG400016167]	0.00752967	0.0382391	0.0410685	0.973001	0	0.0241756	0.146767	0.667414	4.65421	0	Inf	0.52639	0.84719	FALSE	21.6717	0	Inf	0.057046	0.27792	FALSE	0.681248	0	Inf	1	1	FALSE	1.37391	0.33959	1.8942	2.0164	0.80309	0.90403	FALSE	31.1402	0.30914	6.6544	2.75e-08	9.07e-08	UP	1.15441	0.310563		0.82801	0.93221	FALSE
Novel03381	PREDICTED: transcription factor MYB86-like [Solanum tuberosum]	0.0165653	0.152033	0.985022	1.54838	0.0703249	0.361146	1.45788	1.03124	62.2622	3.62603	4.1019	0.052942	0.28048	FALSE	45.5428	3.7173	3.6149	0.066859	0.30537	FALSE	13.5882	3.07032	2.1459	0.49032	0.82419	FALSE	44.9296	1.01877	2.7465	5.4628	1.42e-09	4.77e-09	UP	67.4242	0.927419	6.1839	3.17e-08	1.04e-07	UP	6.25234	0.931689		0.16677	0.24978	FALSE
PGSC0003DMG400008544	Carbohydrate esterase [Source:PGSC_GENE%3BAcc:PGSC0003DMG400008544]	0.0067424	2.42852	1.1825	0.606278	0	2.3886	1.16177	0.258249	57.3688	0	Inf	0.010015	0.10595	FALSE	13.019	0	Inf	0.13185	0.44158	FALSE	102.841	0	Inf	0.001081	0.024935	UP	62.2745	0.478286	8.0569	7.0246	1.11e-12	4.52e-12	UP	30.5086	0.433368	6.1375	3.3e-08	1.08e-07	UP	115.395	0.433317		1.55e-21	1.07e-20	UP
PGSC0003DMG400030163	Avr9/Cf-9 rapidly elicited protein 180 [Source:PGSC_GENE%3BAcc:PGSC0003DMG400030163]	0.0278061	0.402267	2.36504	4.05788	0.460689	1.78143	5.2671	4.90055	126.872	13.2954	3.2544	0.043012	0.24956	FALSE	121.059	13.6301	3.1508	0.030864	0.19351	FALSE	37.4143	11.2578	1.7327	0.41411	0.78685	FALSE	60.4391	0.956571	3.4179	5.9815	0.00082947	0.001742	UP	98.7568	0.866736	6.8321	3.68e-08	1.2e-07	UP	9.26251	0.866634		0.023939	0.043053	UP
PGSC0003DMG400001717	Sts15 protein [Source:PGSC_GENE%3BAcc:PGSC0003DMG400001717]	0.00762557	0.0489377	0.851768	0.867735	0	0.24986	0.863056	1.20452	32.0282	0	Inf	0.041702	0.24515	FALSE	45.8263	0	Inf	0.0088062	0.087064	FALSE	8.24021	0	Inf	0.27507	0.65369	FALSE	33.5958	0.406065	2.2442	6.3704	2.19e-08	6.84e-08	UP	32.6776	0.371687	6.4581	3.89e-08	1.27e-07	UP	1.74437	0.36818		0.63144	0.76424	FALSE
PGSC0003DMG400021652	KDEL motif-containing protein 1 [Source:PGSC_GENE%3BAcc:PGSC0003DMG400021652]	0.0122068	0.0214252	0.351645	1.14852	0.367712	1.47501	1.62863	2.4743	44.6335	12.0868	1.8847	0.35703	0.72951	FALSE	69.8011	12.391	2.494	0.12301	0.42593	FALSE	34.8446	10.2344	1.7675	0.40392	0.78192	FALSE	10.2252	0.478286	0.37744	4.4181	0.010268	0.01875	UP	31.8877	0.433368	6.2013	5.51e-08	1.78e-07	UP	0.562893	0.433317		1	1	FALSE
PGSC0003DMG400005339	Conserved gene of unknown function [Source:PGSC_GENE%3BAcc:PGSC0003DMG400005339]	0.00310412	0.256673	0.195398	0.394481	0.0748054	1.3698	0.200967	0.757685	21.7444	9.6694	1.1691	0.66857	0.93783	FALSE	83.7151	9.9128	3.0781	0.052988	0.26825	FALSE	127.817	8.18752	3.9645	0.0208	0.16419	FALSE	22.3557	0.478286	5.9345	5.5466	0.00035034	0.00076424	UP	43.085	0.433368	6.6354	5.71e-08	1.84e-07	UP	26.5013	0.433317		4.08e-07	1.22e-06	UP
PGSC0003DMG400028434	Serine-threonine protein kinase%2C plant-type [Source:PGSC_GENE%3BAcc:PGSC0003DMG400028434]	0.00372041	0.0441005	0.335532	0.325037	0.0560358	0.116285	0.524025	0.738757	46.7072	6.04338	2.9502	0.16197	0.50496	FALSE	68.3001	6.1955	3.4626	0.046367	0.24809	FALSE	9.12189	5.1172	0.83398	0.92689	1	FALSE	31.9772	0.478286	3.1321	6.063	6.75e-05	0.00015829	UP	29.707	0.433368	6.0991	6.74e-08	2.16e-07	UP	3.79882	0.433317		0.22539	0.32468	FALSE
PGSC0003DMG400006394	DNA binding protein [Source:PGSC_GENE%3BAcc:PGSC0003DMG400006394]	0.0120658	0.102577	0.542389	5.01744	0.358561	20.3047	7.05651	25.9472	559.921	33.8429	4.0483	0.00090355	0.020806	UP	2104.79	34.6948	5.9228	4.67e-07	6.94e-05	UP	1372.9	28.6563	5.5822	1.63e-05	0.0012447	UP	45.257	1.35836	2.6389	5.0582	0.0022731	0.0045241	UP	402.218	1.23656	8.3455	6.84e-08	2.19e-07	UP	7.73751	1.24225		0.16911	0.25296	FALSE
PGSC0003DMG400029892	Sucrose phosphate synthase [Source:PGSC_GENE%3BAcc:PGSC0003DMG400029892]	0.00308277	0.0116511	0.0383871	0.419995	0.10215	0.133756	0.272325	0.546312	29.178	13.2954	1.134	0.6534	0.93051	FALSE	60.6995	13.6301	2.1549	0.18747	0.52723	FALSE	12.6493	11.2578	0.16813	1	1	FALSE	4.4215	0.478286	1.4816	3.2086	0.20199	0.2891	FALSE	46.3321	0.433368	6.7403	6.92e-08	2.21e-07	UP	1.21011	0.433317		0.8102	0.91663	FALSE
PGSC0003DMG401030822	Glycosyltransferase [Source:PGSC_GENE%3BAcc:PGSC0003DMG401030822]	0.00606378	1.65307	0.591765	0.549778	0.109597	6.67619	1.7501	1.34656	96.5205	7.25205	3.7344	0.037463	0.23178	FALSE	76.2539	7.4346	3.3585	0.044424	0.24198	FALSE	319.829	6.14064	5.7028	0.00034721	0.011285	UP	34.6262	0.478286	7.6548	6.1778	1.38e-08	4.35e-08	UP	30.7256	0.433368	6.1477	9.51e-08	3.01e-07	UP	87.3241	0.433317		8.59e-23	6.3e-22	UP
PGSC0003DMG400012492	Serine protease [Source:PGSC_GENE%3BAcc:PGSC0003DMG400012492]	0.00181	0.0161189	0.0170603	0.2169	0.122944	0.160172	0.128201	0.258307	16.9418	19.3388	-0.19091	0.80868	1	FALSE	34.5252	19.8256	0.80028	0.69976	0.94789	FALSE	18.0867	16.375	0.14343	1	1	FALSE	2.37423	0.33959	2.7055	2.8056	0.5209	0.64893	FALSE	28.8625	0.30914	6.5448	1.02e-07	3.22e-07	UP	2.02582	0.310563		0.5582	0.69307	FALSE
PGSC0003DMG400012600	Conserved gene of unknown function [Source:PGSC_GENE%3BAcc:PGSC0003DMG400012600]	0.0122335	0.22209	0.908346	1.22897	0	0.213815	1.09901	1.00161	29.9054	0	Inf	0.047428	0.26546	FALSE	28.094	0	Inf	0.032018	0.19804	FALSE	5.12976	0	Inf	0.4368	0.80501	FALSE	26.3655	0.478286	3.7435	5.7846	1.78e-06	4.8e-06	UP	34.1202	0.433368	6.2989	1.39e-07	4.34e-07	UP	5.80395	0.433317		0.17003	0.25407	FALSE
PGSC0003DMG400029621	Chalcone synthase 1B [Source:PGSC_GENE%3BAcc:PGSC0003DMG400029621]	0.00416731	0.0222274	0.236069	0.411952	0	0.0217002	1.86688	2.67314	127.829	0	Inf	0.00055102	0.015111	UP	186.407	0	Inf	2.23e-05	0.0012201	UP	1.30462	0	Inf	0.96449	1	FALSE	17.0433	0.406065	1.977	5.3913	0.00025904	0.00057378	UP	28.5271	0.371687	6.2621	1.61e-07	4.98e-07	UP	1.44939	0.36818		0.72192	0.8477	FALSE
PGSC0003DMG402012350	GTP binding protein [Source:PGSC_GENE%3BAcc:PGSC0003DMG402012350]	0.00670609	0.0675134	0.591557	0.552318	0	0.0684616	0.496029	0.339862	24.4052	0	Inf	0.069266	0.32542	FALSE	17.3568	0	Inf	0.082818	0.34314	FALSE	2.89837	0	Inf	0.60863	0.9005	FALSE	31.3028	0.478286	2.8953	6.0323	9.04e-08	2.7e-07	UP	27.9331	0.433368	6.0102	1.69e-07	5.22e-07	UP	3.22395	0.433317		0.30379	0.42033	FALSE
PGSC0003DMG400012001	White-brown-complex ABC transporter family [Source:PGSC_GENE%3BAcc:PGSC0003DMG400012001]	0.00147584	0.0425256	0.149674	0.143259	0.0157297	0.134447	0.244866	0.102334	46.9267	3.62603	3.6939	0.099481	0.39519	FALSE	20.1157	3.7173	2.436	0.29793	0.66643	FALSE	22.6728	3.07032	2.8845	0.27599	0.65464	FALSE	30.5205	0.406065	4.4093	6.2319	1.59e-07	4.66e-07	UP	27.9894	0.371687	6.2346	1.81e-07	5.6e-07	UP	7.82354	0.36818		0.02706	0.048214	UP
PGSC0003DMG400046676	Peroxisomal biogenesis factor [Source:PGSC_GENE%3BAcc:PGSC0003DMG400046676]	0.00700698	0	0.0184801	0.667602	0	0.00824649	0.0623265	0.494372	2.55451	0	Inf	0.78088	0.99043	FALSE	20.5527	0	Inf	0.063636	0.2961	FALSE	0.282744	0	Inf	1	1	FALSE	0.793298	0.406065	#NAME?	0.96615	0.98532	1	FALSE	27.3794	0.371687	6.2029	2.25e-07	6.9e-07	UP	0	0.36818		0.97327	1	FALSE
PGSC0003DMG400000777	Histidine-rich glycoprotein [Source:PGSC_GENE%3BAcc:PGSC0003DMG400000777]	0.195897	0.539596	9.32855	16.3784	0.477909	0.503228	1.35448	14.3558	139.075	59.2251	1.2316	0.38452	0.754	FALSE	1525.27	60.7159	4.6508	1.6e-05	0.00095584	UP	44.5549	50.1486	-0.17063	0.85667	1	FALSE	1022.7	28.957	1.0209	5.1423	6.27e-05	0.00014756	UP	1721.15	26.3707	6.0283	2.29e-07	7e-07	UP	53.3814	26.3062		0.022116	0.040003	UP
PGSC0003DMG400023714	Gibberellin 3-beta-dioxygenase [Source:PGSC_GENE%3BAcc:PGSC0003DMG400023714]	0.00504324	0.00546599	0.0251168	0.758385	0.0716687	0.0677532	0.111896	1.07457	6.23848	4.8347	0.36777	1	1	FALSE	61.9722	4.9564	3.6443	0.043119	0.23764	FALSE	3.40624	4.09376	-0.26525	0.79066	0.9926	FALSE	1.49668	0.406065	-0.31979	1.882	0.73147	0.84758	FALSE	43.4026	0.371687	6.8676	2.58e-07	7.85e-07	UP	0.29498	0.36818		1	1	FALSE
PGSC0003DMG400023678	TGA10 transcription factor [Source:PGSC_GENE%3BAcc:PGSC0003DMG400023678]	0.00283571	0.00350718	0.428663	0.51104	0.048154	0.286128	1.36213	1.57327	114.422	4.8347	4.5648	0.01274	0.12267	FALSE	135.821	4.9564	4.7763	0.0031391	0.042566	UP	20.7417	4.09376	2.341	0.35907	0.74003	FALSE	38.0108	0.33959	-0.14203	6.8065	0.0083294	0.015395	UP	43.4263	0.30914	7.1342	2.63e-07	8e-07	UP	0.281446	0.310563		1	1	FALSE
PGSC0003DMG400006235	Gamma-gliadin [Source:PGSC_GENE%3BAcc:PGSC0003DMG400006235]	0.0138975	0.241511	2.33407	1.98209	0.09062	6.6943	5.59646	15.4522	249.857	4.8347	5.6915	0.00048261	0.013843	UP	706.821	4.9564	7.1559	1.63e-07	3.34e-05	UP	261.543	4.09376	5.9975	0.00041325	0.012686	UP	110.021	0.884351	3.682	6.9589	9.85e-05	0.00022709	UP	89.2079	0.805055	6.7919	3.64e-07	1.09e-06	UP	10.2873	0.801497		0.013784	0.025754	UP
Novel01588	Late blight resistance protein, putative [Solanum demissum]	0.00471889	0.0488922	0.0528451	0.509027	0.0200332	0	0	0.00554912	0	1.20868	#NAME?	0.4133	0.7614	FALSE	0.28865	1.2391	-2.1019	0.68112	0.93799	FALSE	0	1.02344	#NAME?	0.47952	0.81741	FALSE	2.81353	0.33959	2.9257	3.0505	0.50492	0.63244	FALSE	25.967	0.30914	6.3923	5.08e-07	1.5e-06	UP	2.35984	0.310563		0.5391	0.67415	FALSE
PGSC0003DMG400014368	PAR-1c protein [Source:PGSC_GENE%3BAcc:PGSC0003DMG400014368]	0.0447555	0.0251783	1.19683	3.76759	0.0412664	0.0741548	0.999986	1.31945	24.5714	1.20868	4.3455	0.14225	0.47505	FALSE	32.8	1.2391	4.7263	0.05324	0.26873	FALSE	1.58736	1.02344	0.6332	1	1	FALSE	30.995	1.56353	-1.2699	4.3092	3.97e-06	1.04e-05	UP	93.0561	1.42333	6.0308	5.47e-07	1.61e-06	UP	0.58996	1.42262		0.80146	0.91139	FALSE
Novel01867	PREDICTED: hydroxyphenylpyruvate reductase-like isoform X1 [Solanum lycopersicum]	0.0152023	0.27992	1.06292	1.35897	1.02618	0.688923	2.2587	1.35654	42.023	22.9648	0.87175	0.70916	0.9539	FALSE	25.905	23.5429	0.13794	1	1	FALSE	11.1898	19.4454	-0.79724	0.53931	0.86027	FALSE	21.0475	0.406065	3.7651	5.6958	8.08e-05	0.00018778	UP	25.75	0.371687	6.1143	6.18e-07	1.82e-06	UP	5.00581	0.36818		0.1223	0.18948	FALSE
Novel03099	--	0.029088	0.204413	0.940849	9.11306	0.900159	0.111822	1.32052	1.57018	23.0571	19.3388	0.25371	1	1	FALSE	28.9636	19.8256	0.54687	0.86827	1	FALSE	1.69647	16.375	-3.2709	0.088859	0.37398	FALSE	17.8907	0.745655	2.3716	4.5846	0.0087885	0.016191	UP	165.095	0.680826	7.9218	7.02e-07	2.05e-06	UP	3.51269	0.678743		0.39023	0.51849	FALSE
PGSC0003DMG401022600	MYC1 [Source:PGSC_GENE%3BAcc:PGSC0003DMG401022600]	0.00398384	0.196005	0.316093	0.475624	0.325529	0.777398	1.48323	0.441358	105.932	27.7995	1.93	0.21917	0.58135	FALSE	31.9964	28.4993	0.16698	1	1	FALSE	48.0466	23.5391	1.0294	0.61621	0.90542	FALSE	23.885	0.406065	5.1811	5.8783	6.78e-06	1.74e-05	UP	34.287	0.371687	6.5274	7.16e-07	2.09e-06	UP	13.3579	0.36818		0.0010967	0.002368	UP
PGSC0003DMG400025445	Gene of unknown function [Source:PGSC_GENE%3BAcc:PGSC0003DMG400025445]	0.0245639	1.13883	3.73657	2.14922	0	0.015142	0.121566	0.0930647	3.05712	0	Inf	0.6949	0.946	FALSE	2.41902	0	Inf	0.7441	0.97312	FALSE	0.340624	0	Inf	1	1	FALSE	99.824	0.884351	5.0983	6.8186	3.45e-10	1.21e-09	UP	54.7028	0.805055	6.0864	8.7e-07	2.52e-06	UP	27.4571	0.801497		9.98e-07	2.9e-06	UP
PGSC0003DMG400024061	Zinc finger%2C RING-type [Source:PGSC_GENE%3BAcc:PGSC0003DMG400024061]	0.0109087	0.333286	1.55618	1.48197	0.348799	28.5558	6.28722	7.87557	162.782	10.8781	3.9034	0.013382	0.1267	FALSE	210.627	11.1519	4.2393	0.0022944	0.034183	UP	643.423	9.21096	6.1263	1.97e-05	0.0014361	UP	42.8872	0.406065	4.4965	6.7227	6.82e-05	0.00015981	UP	38.9758	0.371687	6.7123	1.05e-06	3.03e-06	UP	8.31082	0.36818		0.040616	0.069921	FALSE
PGSC0003DMG400016834	Methyltransferase [Source:PGSC_GENE%3BAcc:PGSC0003DMG400016834]	0.00953398	0.0965567	0.34249	0.958148	0	0.0421213	0.424966	1.03722	10.597	0	Inf	0.23919	0.60307	FALSE	26.6744	0	Inf	0.037866	0.21875	FALSE	0.906113	0	Inf	1	1	FALSE	9.045	0.33959	2.8923	4.7353	0.019603	0.034342	UP	24.2203	0.30914	6.2918	1.67e-06	4.73e-06	UP	2.30571	0.310563		0.48712	0.62218	FALSE
PGSC0003DMG400026240	Flavonol synthase/flavanone 3-hydroxylase [Source:PGSC_GENE%3BAcc:PGSC0003DMG400026240]	0.0107596	0.0413347	0.291864	1.06606	0	0.082632	0.164788	0.671724	3.63929	0	Inf	0.62079	0.91175	FALSE	15.1634	0	Inf	0.10549	0.39241	FALSE	1.55557	0	Inf	0.87833	1	FALSE	6.83668	0.33959	1.491	4.3314	0.067014	0.10697	FALSE	23.8671	0.30914	6.2706	2.04e-06	5.72e-06	UP	0.872966	0.310563		0.93529	1	FALSE
PGSC0003DMG400019154	Protein phosphatase 2c [Source:PGSC_GENE%3BAcc:PGSC0003DMG400019154]	0.00220503	0.0430625	0.234771	0.210628	0.0655273	0.10945	0.167525	0.240687	17.9665	8.46073	1.0865	0.73273	0.96748	FALSE	26.5446	8.6737	1.6137	0.43848	0.78181	FALSE	10.1622	7.16408	0.50436	0.99387	1	FALSE	26.8209	0.33959	3.8362	6.3034	1.36e-06	3.7e-06	UP	22.9604	0.30914	6.2147	3.03e-06	8.37e-06	UP	4.43562	0.310563		0.16903	0.25286	FALSE
PGSC0003DMG400002167	Glutathion S-transferase [Source:PGSC_GENE%3BAcc:PGSC0003DMG400002167]	0.30165	7.62552	27.3706	31.2078	0.430561	13.5574	16.5932	16.9634	579.607	18.1301	4.9986	0.00010097	0.0047265	UP	605.929	18.5865	5.0268	2.44e-05	0.0012973	UP	413.927	15.3516	4.7529	0.00086874	0.021579	UP	1019.74	15.1513	4.2172	6.0726	8.06e-29	7.02e-28	UP	1107.09	13.8008	6.3259	9.88e-06	2.61e-05	UP	256.403	13.7854		8.47e-19	5.16e-18	UP
PGSC0003DMG400021621	Wiscott-Aldrich syndrome%2C C-terminal [Source:PGSC_GENE%3BAcc:PGSC0003DMG400021621]	0.00625105	0.127529	0.316608	0.601202	0.928819	4.06603	0.482992	2.08222	18.6142	42.3036	-1.1844	0.33121	0.70541	FALSE	81.3047	43.3685	0.90669	0.57088	0.87943	FALSE	132.215	35.8204	1.884	0.19004	0.54981	FALSE	12.7524	0.33959	3.9017	5.2308	0.0027204	0.0053624	UP	23.2326	0.30914	6.2317	1.05e-05	2.75e-05	UP	4.6416	0.310563		0.14828	0.22483	FALSE
PGSC0003DMG400044171	P69E protein [Source:PGSC_GENE%3BAcc:PGSC0003DMG400044171]	0.00388877	0.909235	0.153619	0.337742	0.0150428	0.049066	0.0272817	0.0569257	3.6085	2.41735	0.57797	1	1	FALSE	7.81061	2.4782	1.6561	0.67496	0.93799	FALSE	5.72134	2.04688	1.4829	0.82622	1	FALSE	21.827	0.745655	7.4251	4.8715	0.0024243	0.0048073	UP	45.7906	0.680826	6.0716	4.34e-05	0.0001073	UP	116.648	0.678743		6.26e-29	6e-28	UP
PGSC0003DMG400013684	Elicitor-inducible cytochrome P450 [Source:PGSC_GENE%3BAcc:PGSC0003DMG400013684]	0.0630681	1.76681	2.0048	9.728	0.198342	30.1507	10.2037	37.9621	1098.57	25.3822	5.4357	8.21e-06	0.00085846	UP	4174.29	26.0211	7.3257	4.18e-08	1.22e-05	UP	2758.71	21.4922	7.004	4.79e-07	9.43e-05	UP	226.868	9.62216	4.3717	4.5593	5.01e-08	1.52e-07	UP	1058.55	8.72891	6.9221	8.17e-05	0.00019671	UP	180.606	8.72387		1.92e-17	1.09e-16	UP
PGSC0003DMG400000547	UP-9A [Source:PGSC_GENE%3BAcc:PGSC0003DMG400000547]	0.00744507	0.0947944	0.245803	0.890688	0.0316067	0.0353053	0.360945	0.711271	11.3999	1.20868	3.2375	0.38902	0.75927	FALSE	23.2894	1.2391	4.2323	0.1084	0.39883	FALSE	0.977039	1.02344	-0.066939	1	1	FALSE	8.30916	0.33959	3.2217	4.6128	0.027711	0.0474	UP	28.7001	0.30914	6.5367	0.00012734	0.00030078	UP	2.89723	0.310563		0.36548	0.49182	FALSE
Novel01295	--	0.0218013	0.393983	4.7159	2.22524	0.394038	1.02403	5.48979	1.90115	83.7313	7.25205	3.5293	0.056819	0.29129	FALSE	30.0218	7.4346	2.0137	0.32053	0.6896	FALSE	13.5469	6.14064	1.1415	0.70928	0.95478	FALSE	76.8255	0.478286	3.7368	7.3276	2.39e-07	6.9e-07	UP	34.7949	0.433368	6.3271	0.00013351	0.00031456	UP	5.77689	0.433317		0.18693	0.27616	FALSE
PGSC0003DMG400029406	Glyceraldehyde-3-phosphate dehydrogenase B subunit [Source:PGSC_GENE%3BAcc:PGSC0003DMG400029406]	0.00326062	0	0.0484072	0.483832	0	0.0392585	0.0505565	0.415295	4.27076	0	Inf	0.55671	0.86893	FALSE	36.7884	0	Inf	0.016483	0.13124	FALSE	2.89837	0	Inf	0.60863	0.9005	FALSE	4.46261	0.406065	#NAME?	3.4581	0.18403	0.2664	FALSE	42.8908	0.371687	6.8504	0.00015808	0.00036935	UP	0	0.36818		0.97327	1	FALSE
PGSC0003DMG400002959	Strictosidine synthase [Source:PGSC_GENE%3BAcc:PGSC0003DMG400002959]	0.00804481	0.0431525	1.11734	0.769388	0	0.0554101	0.733867	0.236321	56.4859	0	Inf	0.010292	0.10816	FALSE	18.5471	0	Inf	0.073446	0.32145	FALSE	3.66455	0	Inf	0.55818	0.87146	FALSE	91.1135	0.884351	1.9877	6.6869	2.49e-19	1.43e-18	UP	59.7232	0.805055	6.2131	0.00037374	0.00083617	UP	3.17867	0.801497		0.4249	0.55679	FALSE
PGSC0003DMG400008985	Basic 7S globulin 2 small subunit [Source:PGSC_GENE%3BAcc:PGSC0003DMG400008985]	0.00413486	0.241044	0.75575	0.390577	0.0351076	28.6244	6.1908	3.90919	358.863	2.41735	7.2139	1.81e-05	0.0014594	UP	232.02	2.4782	6.5488	6.59e-05	0.0026664	UP	1410.6	2.04688	9.4287	9.92e-09	5.1e-06	UP	46.0526	0.33959	5.4154	7.0833	8.39e-08	2.51e-07	UP	22.657	0.30914	6.1956	0.00041678	0.0009263	UP	13.2538	0.310563		0.0011585	0.0024953	UP
PGSC0003DMG400004675	Extensin class 1 protein [Source:PGSC_GENE%3BAcc:PGSC0003DMG400004675]	0.00162372	0.0233217	0.0231652	0.294041	0	0.0398377	0.033075	0.190901	4.78618	0	Inf	0.50672	0.83121	FALSE	28.5904	0	Inf	0.030976	0.19387	FALSE	5.0083	0	Inf	0.43924	0.80662	FALSE	3.59817	0.33959	3.3939	3.4054	0.32691	0.44071	FALSE	43.4151	0.30914	7.1338	0.00056563	0.0012377	UP	3.26455	0.310563		0.30992	0.42728	FALSE
PGSC0003DMG400000781	Extensin [Source:PGSC_GENE%3BAcc:PGSC0003DMG400000781]	0.0466042	0.157654	5.49321	5.36732	0	0.351244	5.92034	6.65576	180.37	0	Inf	9.86e-05	0.0046667	UP	210.06	0	Inf	1.08e-05	0.00069286	UP	9.32897	0	Inf	0.24	0.61006	FALSE	178.452	2.04182	1.3183	6.4495	3.73e-19	2.12e-18	UP	167.074	1.8567	6.4916	0.00060611	0.0013212	UP	4.62807	1.85594		0.4661	0.6	FALSE
PGSC0003DMG400006276	NtPRp27 [Source:PGSC_GENE%3BAcc:PGSC0003DMG400006276]	0.0052277	0.30803	0.331323	0.491057	0.088773	1.60952	1.02331	1.38319	45.8108	4.8347	3.2442	0.13602	0.46537	FALSE	64.2375	4.9564	3.6961	0.039736	0.2256	FALSE	62.7031	4.09376	3.937	0.051151	0.27851	FALSE	15.974	0.33959	5.4305	5.5558	0.00096456	0.0020101	UP	22.5344	0.30914	6.1877	0.0006552	0.0014207	UP	13.3938	0.310563		0.0011048	0.0023845	UP
PGSC0003DMG400023843	Fatty acid desaturase [Source:PGSC_GENE%3BAcc:PGSC0003DMG400023843]	0.00377641	0.020373	0.075308	0.31796	0.026833	0.0551064	0.0681613	0.152774	5.19632	2.41735	1.1041	0.94779	1	FALSE	11.6966	2.4782	2.2387	0.45424	0.79529	FALSE	3.61236	2.04688	0.81952	1	1	FALSE	6.01052	0.406065	1.9919	3.8877	0.13719	0.20481	FALSE	24.128	0.371687	6.0205	0.00069754	0.0015071	UP	1.46449	0.36818		0.72024	0.84589	FALSE
PGSC0003DMG401023595	Cytochrome P450 [Source:PGSC_GENE%3BAcc:PGSC0003DMG401023595]	0.0031661	0.00686299	0.52732	0.413936	0.0112482	0.0122331	0.231363	0.813594	20.5595	1.20868	4.0883	0.18839	0.53695	FALSE	74.5027	1.2391	5.9099	0.0054582	0.063141	FALSE	0.963992	1.02344	-0.086333	1	1	FALSE	50.068	0.406065	0.68021	6.946	0.00020204	0.00045208	UP	37.4421	0.371687	6.6544	0.002438	0.0049232	UP	0.58996	0.36818		1	1	FALSE
Novel03642	PREDICTED: cytochrome P450 71A1-like [Solanum lycopersicum]	19.2219	1.23265	0.0628838	0.154991	0	0	0.0112464	0	0.291082	0	Inf	1	1	FALSE	0	0	NA	NA	NA	NA	0	0	NA	NA	NA	NA	1.70654	704.391	-4.4059	-8.6892	1.21e-125	1.34e-123	DOWN	4.03218	641.506	-7.3138	3.12e-111	3.89e-109	DOWN	30.2182	640.594		3.16e-70	1.24e-68	DOWN
PGSC0003DMG401020927	Putative bHLH transcription factor [Source:PGSC_GENE%3BAcc:PGSC0003DMG401020927]	25.5338	0.0896287	0.042175	0.36743	15.2627	0.109558	0.0145432	0.161326	0.582165	725.205	-10.283	3.68e-16	1.51e-12	DOWN	6.61962	743.46	-6.8114	3.95e-13	8.17e-10	DOWN	3.8121	614.064	-7.3317	4.42e-11	9.78e-08	DOWN	1.77185	1447.02	-8.5939	-9.6736	4.44e-90	2.42e-88	DOWN	14.8873	1316.89	-6.4669	1.91e-71	8.67e-70	DOWN	3.40442	1315.43		4.35e-84	2.47e-82	DOWN
PGSC0003DMG400028094	Gene of unknown function [Source:PGSC_GENE%3BAcc:PGSC0003DMG400028094]	10.4109	0.309924	0.053356	0.137646	1.32006	0.0398107	0.039355	0.00760408	1.49083	59.2251	-5.312	0.0012002	0.0254	DOWN	0.285683	60.7159	-7.7315	1.78e-05	0.0010261	DOWN	1.27283	50.1486	-5.3001	0.0014916	0.030586	DOWN	2.118	557.165	-5.5126	-8.0393	9.95e-83	4.51e-81	DOWN	5.24812	507.578	-6.5957	4.64e-69	1.92e-67	DOWN	11.0928	506.388		1.21e-64	4.01e-63	DOWN
PGSC0003DMG400021056	Conserved gene of unknown function [Source:PGSC_GENE%3BAcc:PGSC0003DMG400021056]	6.744	0.989145	0.0330028	0.0858162	0	0	0	0	0	0	NA	NA	NA	NA	0	0	NA	NA	NA	NA	0	0	NA	NA	NA	NA	1.47208	406.128	-3.213	-8.1079	3.28e-66	9.7e-65	DOWN	3.66295	369.85	-6.6578	1.23e-57	3.64e-56	DOWN	39.8392	369.411		3.58e-26	3.07e-25	DOWN
PGSC0003DMG400011197	Heat shock protein hsp70 [Source:PGSC_GENE%3BAcc:PGSC0003DMG400011197]	68.8138	2.61908	3.4989	1.00316	23.9676	0.355289	0.339176	0.295221	36.9813	3166.73	-6.4201	1.21e-15	4.36e-12	DOWN	33.0093	3246.44	-6.6198	6.6e-18	6.37e-14	DOWN	33.6491	2681.41	-6.3163	2.52e-13	1.21e-09	DOWN	408.766	10845.1	-5.1585	-4.7296	1.38e-35	1.58e-34	DOWN	112.773	9876.98	-6.4526	7.2e-54	1.9e-52	DOWN	276.228	9865.54		6.75e-39	9.7e-38	DOWN
PGSC0003DMG400030199	Conserved gene of unknown function [Source:PGSC_GENE%3BAcc:PGSC0003DMG400030199]	2.3701	0.0472585	0.0134726	0.0137176	2.95582	0	0.200174	0.190288	8.1133	143.832	-4.148	0.0010386	0.023056	DOWN	7.92932	147.453	-4.2169	0.00023587	0.0066879	DOWN	0	121.789	#NAME?	1.94e-07	4.98e-05	DOWN	0.580609	137.551	-6.0925	-7.8882	5.5e-28	4.64e-27	DOWN	0.561972	125.152	-7.799	1.47e-27	1.39e-26	DOWN	1.83181	125.002		4.2e-24	3.26e-23	DOWN
PGSC0003DMG400027019	Polygalacturonase-1 non-catalytic subunit beta [Source:PGSC_GENE%3BAcc:PGSC0003DMG400027019]	1.48799	0.110331	0.00870612	0.025965	1.7183	0.185259	0.0114636	0.0350162	0.944083	166.797	-7.465	5.68e-07	0.00012454	DOWN	2.93026	170.996	-5.8668	1.1e-06	0.00012979	DOWN	12.9833	141.235	-3.4434	0.0049399	0.066465	FALSE	0.746925	172.271	-4.1953	-7.8495	5.43e-27	4.41e-26	DOWN	2.13939	156.757	-6.1952	8.76e-24	6.98e-23	DOWN	8.55337	156.692		2.41e-16	1.3e-15	DOWN
PGSC0003DMG400021721	Root phototropism protein [Source:PGSC_GENE%3BAcc:PGSC0003DMG400021721]	4.37645	0.298428	0.0563766	0.00454936	1.99849	0.087386	0.0473724	0.104114	2.73988	143.832	-5.7141	3.73e-05	0.0024042	DOWN	6.42594	147.453	-4.5202	8.44e-05	0.0031747	DOWN	4.53056	121.789	-4.7486	0.00049195	0.014483	DOWN	3.58222	375.74	-4.3183	-6.7127	2.63e-17	1.38e-16	DOWN	0.276987	342.437	-10.272	2.18e-22	1.62e-21	DOWN	17.1359	341.862		2.95e-11	1.19e-10	DOWN
Novel00090	PREDICTED: isoleucine N-monooxygenase 1-like [Solanum lycopersicum]	1.35503	0.0254246	0	0.00891918	0.0611106	0	0	0.00250897	0	9.6694	#NAME?	0.021044	0.16805	FALSE	0.34504	9.9128	-4.8445	0.033246	0.20273	FALSE	0	8.18752	#NAME?	0.027072	0.19265	FALSE	0	255.707	-6.1791	#NAME?	1.52e-20	9.27e-20	DOWN	1.20019	232.616	-7.5985	3.79e-17	2.2e-16	DOWN	3.21042	232.63		3.21e-14	1.54e-13	DOWN
PGSC0003DMG400017848	Photosystem Q(B) protein [Source:PGSC_GENE%3BAcc:PGSC0003DMG400017848]	1.45233	0.207454	0.0491214	0.0243747	1.09728	0.333559	0.00905033	0.137803	0.304431	45.9297	-7.2372	0.00034609	0.010955	DOWN	4.93894	47.0858	-3.253	0.016843	0.13295	FALSE	9.9886	38.8907	-1.9611	0.1658	0.51626	FALSE	1.81823	72.5133	-3.2476	-5.3176	2.49e-16	1.23e-15	DOWN	0.854956	66.0499	-6.2716	4.71e-17	2.72e-16	DOWN	6.93689	65.8844		1.53e-09	5.53e-09	DOWN
Novel00007	PREDICTED: cohesin subunit SA-1-like [Solanum tuberosum]	2.04832	0.440313	0.0351759	0.0377601	1.41517	0.135076	0.0396335	0.0604453	0.9795	41.095	-5.3908	0.0022925	0.039502	DOWN	1.49074	42.1294	-4.8207	0.0020127	0.031173	DOWN	2.84714	34.797	-3.6114	0.024805	0.18254	FALSE	0.904986	70.9486	-2.6625	-6.2927	7.75e-19	4.35e-18	DOWN	0.931204	64.6092	-6.1165	4.8e-17	2.77e-16	DOWN	10.1959	64.5514		6.12e-08	1.96e-07	DOWN
PGSC0003DMG400002780	Conserved gene of unknown function [Source:PGSC_GENE%3BAcc:PGSC0003DMG400002780]	1.44887	0.166811	0.0705448	0.0192075	2.92815	0.367491	0.342904	0.064659	10.4102	107.572	-3.3692	0.0099165	0.10536	FALSE	2.00572	110.28	-5.7809	1.74e-05	0.0010135	DOWN	9.63397	91.0862	-3.241	0.015584	0.13708	FALSE	2.28998	63.4813	-3.561	-4.7929	2.98e-10	1.05e-09	DOWN	0.600096	57.7526	-6.5885	4.46e-13	2.06e-12	DOWN	4.88571	57.662		5.98e-08	1.92e-07	DOWN
PGSC0003DMG400024028	Gene of unknown function [Source:PGSC_GENE%3BAcc:PGSC0003DMG400024028]	0.944091	0.0240333	0.0489069	0.0146674	1.27481	0.0577681	0	0.183951	0	58.0164	#NAME?	2.8e-05	0.0019567	DOWN	7.19769	59.4768	-3.0467	0.018759	0.14175	FALSE	1.92798	49.1251	-4.6713	0.0035175	0.053533	FALSE	1.9656	51.2405	-5.7376	-4.7042	8.85e-10	3.01e-09	DOWN	0.561972	46.6033	-6.3738	2.78e-12	1.22e-11	DOWN	0.872966	46.5788		1.76e-11	7.21e-11	DOWN
PGSC0003DMG400024682	Gene of unknown function [Source:PGSC_GENE%3BAcc:PGSC0003DMG400024682]	1.14911	0.0220276	0.160235	0.0195598	0.541539	0.110393	0.196854	0.140432	5.40839	18.1301	-1.7451	0.27744	0.64844	FALSE	4.0166	18.5865	-2.2102	0.14803	0.46877	FALSE	2.61563	15.3516	-2.5532	0.16388	0.51294	FALSE	4.74061	45.887	-6.1431	-3.2749	1.04e-06	2.87e-06	DOWN	0.553974	41.7827	-6.2369	2.85e-11	1.17e-10	DOWN	0.58996	41.6947		2.99e-11	1.21e-10	DOWN
Novel03542	--	0.841534	0.758654	0.0253246	0.0152181	0.633785	0.114325	0.154277	0.172358	5.66041	27.7995	-2.2961	0.13303	0.46092	FALSE	6.49794	28.4993	-2.1329	0.12385	0.42798	FALSE	3.59362	23.5391	-2.7115	0.09221	0.38268	FALSE	0.981385	44.0303	-0.59044	-5.4875	1.04e-10	3.75e-10	DOWN	0.561972	40.1107	-6.1573	6.72e-11	2.68e-10	DOWN	26.5782	40.0189		0.2443	0.34876	FALSE
PGSC0003DMG400005817	Cytochrome P450 [Source:PGSC_GENE%3BAcc:PGSC0003DMG400005817]	0.922024	0.147754	0.0133827	0.0133464	0.506042	0.0726477	0.100639	0.174037	6.79395	41.095	-2.5966	0.076701	0.34167	FALSE	12.1396	42.1294	-1.7951	0.15509	0.47989	FALSE	4.33845	34.797	-3.0037	0.046832	0.26559	FALSE	0.959614	89.3016	-3.0859	-6.5401	7.38e-10	2.53e-09	DOWN	0.923206	81.2455	-6.4595	5.91e-10	2.2e-09	DOWN	9.57259	81.2798		3.18e-05	8.08e-05	DOWN
PGSC0003DMG400006696	Catechol O-methyltransferase [Source:PGSC_GENE%3BAcc:PGSC0003DMG400006696]	1.2211	0.0216611	0	0.00775529	0	0	0	0.0274604	0	0	NA	NA	NA	NA	1.1546	0	Inf	1	1	FALSE	0	0	NA	NA	NA	NA	0	71.0218	-6.2583	#NAME?	4.61e-11	1.71e-10	DOWN	0.323109	64.6007	-7.6434	6.82e-10	2.52e-09	DOWN	0.844339	64.6342		1.24e-08	4.18e-08	DOWN
PGSC0003DMG400007055	CYP72A58 [Source:PGSC_GENE%3BAcc:PGSC0003DMG400007055]	0.42152	0.00328462	0	0.00352796	0.326961	0.00459557	0.00322291	0	0.291082	35.0516	-6.9119	0.001124	0.024407	DOWN	0	35.9339	#NAME?	8.78e-05	0.0032389	DOWN	0.35367	29.6798	-6.3909	0.0019107	0.035944	DOWN	0	53.9076	-7.4455	#NAME?	4.28e-11	1.59e-10	DOWN	0.323109	49.1389	-7.2487	9.76e-10	3.57e-09	DOWN	0.281446	49.0602		1.1e-09	4.01e-09	DOWN
PGSC0003DMG400012174	ATP binding protein [Source:PGSC_GENE%3BAcc:PGSC0003DMG400012174]	17.699	3.89864	0.170223	0.155453	19.4552	1.42998	0.256	1.22829	23.5991	2144.19	-6.5056	5.63e-15	1.8e-11	DOWN	114.888	2198.16	-4.258	5.24e-09	2.41e-06	DOWN	112.721	1815.58	-4.0096	1.23e-06	0.00019299	DOWN	16.5802	2327	-2.6266	-7.1329	4.33e-09	1.41e-08	DOWN	14.5271	2121.08	-7.1899	2.44e-09	8.68e-09	DOWN	343.097	2118.8		0.0015516	0.0032936	DOWN
Novel02735	hypothetical protein AALP_AA3G369100 [Arabis alpina]	1.23464	0.0171626	0.0188272	0.0122894	6.44093	0.0219349	0.00623284	0	0.3265	396.446	-10.246	2.08e-12	3.52e-09	DOWN	0	406.425	#NAME?	2.31e-15	7.45e-12	DOWN	0.977039	335.688	-8.4245	5.01e-10	5.34e-07	DOWN	1.02493	90.6293	-6.6099	-6.4664	1.29e-08	4.09e-08	DOWN	0.646219	82.4216	-6.9949	3.37e-09	1.19e-08	DOWN	0.844339	82.4722		1.35e-08	4.55e-08	DOWN
PGSC0003DMG400003962	RING-H2 finger protein ATL1L [Source:PGSC_GENE%3BAcc:PGSC0003DMG400003962]	0.492266	0.126119	0.0163875	0.00589571	0.712416	0.00854075	0.0179691	0.00591429	0.873247	41.095	-5.5564	0.0023064	0.039633	DOWN	0.285683	42.1294	-7.2043	0.0001509	0.0047583	DOWN	0.35367	34.797	-6.6204	0.0010255	0.024213	DOWN	0.836841	33.8762	-2.4052	-5.3392	1.71e-07	4.99e-07	DOWN	0.284985	30.8915	-6.7602	4.87e-08	1.58e-07	DOWN	5.81111	30.7818		0.00074685	0.0016435	DOWN
PGSC0003DMG401017090	Patatin-3-Kuras 1 [Source:PGSC_GENE%3BAcc:PGSC0003DMG401017090]	18.9836	1.66368	0.851633	0.138132	11.782	1.7226	6.31683	1.92391	317.921	698.614	-1.1358	0.13691	0.46651	FALSE	98.9992	716.2	-2.8549	0.00021312	0.0061819	DOWN	73.391	591.548	-3.0108	0.0012331	0.027118	DOWN	44.6078	1342.39	-3.9588	-4.9114	8.53e-05	0.00019779	DOWN	6.9279	1220.55	-7.4609	1.13e-07	3.56e-07	DOWN	78.5959	1222.14		0.00043016	0.00097246	DOWN
PGSC0003DMG400028535	Conserved gene of unknown function [Source:PGSC_GENE%3BAcc:PGSC0003DMG400028535]	6.67675	0.0418527	0.00339759	0.0691335	17.5117	0.0413678	0.0142298	0.0174504	0.944083	1369.43	-10.502	2.55e-21	7.34e-17	DOWN	1.14273	1403.9	-10.263	1.12e-23	1.63e-19	DOWN	2.39741	1159.56	-8.9179	2.03e-16	5.83e-12	DOWN	0.234461	622.627	-7.7574	-11.375	1.01e-10	3.66e-10	DOWN	4.57977	565.825	-6.9489	1.14e-07	3.58e-07	DOWN	2.61578	565.997		2.21e-08	7.33e-08	DOWN
PGSC0003DMG400020939	Sesquiterpene synthase 2 [Source:PGSC_GENE%3BAcc:PGSC0003DMG400020939]	3.73717	0.275497	0.0184022	0.0215594	0.53633	0.494806	0.00938657	0.0273444	0.873247	59.2251	-6.0837	0.0004595	0.013394	DOWN	2.59489	60.7159	-4.5483	0.001397	0.024024	DOWN	39.4874	50.1486	-0.34482	0.689	0.94412	FALSE	1.79645	492.307	-4.2056	-8.0983	1.46e-07	4.28e-07	DOWN	2.00903	448.739	-7.8032	2.22e-07	6.78e-07	DOWN	24.3053	448.434		0.00035993	0.00082017	DOWN
PGSC0003DMG400033083	Ribonuclease H [Source:PGSC_GENE%3BAcc:PGSC0003DMG400033083]	0.482512	0.0740618	0.0160749	0.00833889	1.304	0.0331046	0.0186954	0	0.630931	53.1817	-6.3973	0.00040123	0.012209	DOWN	0	54.5204	#NAME?	7.89e-06	0.00056068	DOWN	0.977039	45.0314	-5.5264	0.0014304	0.02983	DOWN	0.580609	23.4701	-3.1455	-5.3371	4.08e-06	1.07e-05	DOWN	0.284985	21.3575	-6.2277	3.48e-06	9.58e-06	DOWN	2.40824	21.3096		0.00088955	0.001941	DOWN
PGSC0003DMG400038034	Desacetoxyvindoline 4-hydroxylase [Source:PGSC_GENE%3BAcc:PGSC0003DMG400038034]	0.267621	0.0793365	0.0378952	0.00531208	0.339825	0.0278987	0.0406799	0.0124017	2.1926	21.7562	-3.3107	0.059208	0.29902	FALSE	0.69008	22.3038	-5.0144	0.0058521	0.066384	FALSE	1.27283	18.4219	-3.8553	0.040629	0.24645	FALSE	2.14543	20.4388	-2.1983	-3.252	0.00063135	0.0013427	DOWN	0.284985	18.6264	-6.0303	1.04e-05	2.73e-05	DOWN	4.05476	18.6092		0.011263	0.021286	DOWN
PGSC0003DMG400006612	Gene of unknown function [Source:PGSC_GENE%3BAcc:PGSC0003DMG400006612]	1.71198	0.553927	0.145495	0.0145146	0.267904	0.119702	0.0321099	0.0302474	0.595514	6.04338	-3.3431	0.1759	0.52423	FALSE	0.571366	6.1955	-3.4387	0.14395	0.46325	FALSE	1.95408	5.1172	-1.3889	0.47067	0.81741	FALSE	2.90588	46.0754	-2.0685	-3.987	0.0010852	0.0022496	DOWN	0.276987	42.0395	-7.2458	2.83e-05	7.15e-05	DOWN	9.97725	41.8498		0.029452	0.052138	FALSE
PGSC0003DMG400024428	Conserved gene of unknown function [Source:PGSC_GENE%3BAcc:PGSC0003DMG400024428]	22.9198	1.83459	0.792302	0.187571	6.3943	1.26146	0.540766	0.872851	10.98	155.919	-3.8279	0.0018762	0.034261	DOWN	18.2984	159.844	-3.1269	0.0034422	0.045505	DOWN	22.3647	132.024	-2.5615	0.025171	0.18451	FALSE	17.0916	666.801	-4.0822	-5.2859	0.001525	0.0031051	DOWN	3.87143	608.512	-7.2963	8.5e-05	0.00020425	DOWN	35.7322	605.225		0.0069409	0.013551	DOWN
PGSC0003DMG400041108	RRNA intron-encoded homing endonuclease [Source:PGSC_GENE%3BAcc:PGSC0003DMG400041108]	44.8803	2.84597	4.71749	0.121074	0.147085	4.64729	1.00344	3.45867	14.0174	2.41735	2.5357	0.45109	0.79081	FALSE	47.9405	2.4782	4.2739	0.036434	0.21438	FALSE	56.8655	2.04688	4.7961	0.035651	0.22712	FALSE	68.5748	879.58	-4.4247	-3.6811	0.030575	0.051943	FALSE	1.67792	799.239	-8.8958	0.00010715	0.00025498	DOWN	37.315	801.398		0.011573	0.021839	DOWN
PGSC0003DMG400023070	Conserved gene of unknown function [Source:PGSC_GENE%3BAcc:PGSC0003DMG400023070]	1.87443	0	0	0.03166	2.813	0.0798231	0.196537	0.0992922	1.78191	30.2169	-4.0839	0.019979	0.16378	FALSE	0.922341	30.9775	-5.0698	0.0029381	0.040523	DOWN	0.623368	25.586	-5.3591	0.0067112	0.080669	FALSE	0	24.0225	#NAME?	#NAME?	1.82e-05	4.49e-05	DOWN	0.284985	21.9173	-6.265	0.00013094	0.00030876	DOWN	0	21.8203		2.69e-05	6.87e-05	DOWN
PGSC0003DMG400022741	Multidrug resistance pump [Source:PGSC_GENE%3BAcc:PGSC0003DMG400022741]	0.198885	8.86543	0.069044	0.00260593	0.298214	45.6936	0.25151	0.186927	26.5609	37.4689	-0.49639	0.65448	0.93107	FALSE	19.908	38.4121	-0.94821	0.43676	0.78045	FALSE	4139.91	31.7266	7.0278	8.05e-07	0.00013782	UP	7.6842	29.7945	5.0389	-1.9551	0.18981	0.27383	FALSE	0.276987	27.0477	-6.6095	0.0079044	0.014884	DOWN	889.348	27.053		4.43e-116	5.78e-114	UP
PGSC0003DMG400033050	Conserved gene of unknown function [Source:PGSC_GENE%3BAcc:PGSC0003DMG400033050]	0.687377	0.215549	0.00815622	0.00921796	0.272225	0.0138701	0	0.0488792	0	9.6694	#NAME?	0.021044	0.16805	FALSE	1.49964	9.9128	-2.7247	0.15005	0.47185	FALSE	0.35367	8.18752	-4.5329	0.064041	0.31509	FALSE	0.256232	29.1251	-2.1203	-6.8287	0.0077984	0.01448	DOWN	0.276987	26.538	-6.5821	0.0093035	0.017344	DOWN	6.11076	26.5685		0.15425	0.23289	FALSE
