# Supplementary material for: A Genome-Wide View of the Transcriptome Dynamics of Fresh-Cut Potato Tubers
Source: Genes (Basel). 2023 Jan 10;14(1):181. doi: 10.3390/genes14010181 (PMC9859442; doi:10.3390/genes14010181)
Supplement: Supplementary file 1 [file genes-14-00181-s001.zip › Table S9 The transcriptional factors in response to cut-wounding at different time.xlsx]

## Sheet: 4 h
Table S7 The transcriptional factors in response to cut-wounding at different time
Family	Gene_ID	log2FoldChange（X2_4h vs X2_0h）	pval(X2_4h vs X2_0h)	padj(X2_4h vs X2_0h)	significant(X2_4h vs X2_0h)
SNF2	Novel00287	1.4504	7.84e-24	6.01e-23	UP
FAR1	Novel00371	1.0413	6.09e-10	2.27e-09	UP
Orphans	Novel00741	1.0002	2.06e-07	6.33e-07	UP
RWP-RK	Novel01111	3.7851	8.02e-08	2.55e-07	UP
DDT	Novel01129	1.4311	1.75e-24	1.38e-23	UP
AP2-EREBP	Novel01224	5.348	6.36e-56	1.63e-54	UP
MADS	Novel01421	2.477	1.04e-16	5.67e-16	UP
MADS	Novel01529	1.4172	6.63e-22	4.67e-21	UP
TAZ	Novel01699	1.3444	1.86e-07	5.75e-07	UP
SET	Novel01713	1.542	6.26e-11	2.48e-10	UP
FAR1	Novel02027	1.7176	2.42e-25	1.98e-24	UP
CCAAT	Novel02323	1.0139	2.28e-11	9.29e-11	UP
LOB	Novel02473	5.5411	1.9e-05	4.93e-05	UP
bHLH	Novel02679	2.608	7.86e-28	7.22e-27	UP
MADS	Novel02803	1.0078	0.0088005	0.016929	UP
FHA	Novel02920	3.1145	9.18e-26	7.69e-25	UP
MYB	Novel03208	1.4711	2.05e-12	8.89e-12	UP
bZIP	Novel03367	1.068	1.17e-15	6.08e-15	UP
MADS	PGSC0003DMG400000062	2.739	4.2e-20	2.72e-19	UP
WRKY	PGSC0003DMG400000064	3.9983	0.00013192	0.00031464	UP
TCP	PGSC0003DMG400000133	1.2938	4.12e-16	2.19e-15	UP
ARID	PGSC0003DMG400000178	3.2066	6.18e-20	3.96e-19	UP
WRKY	PGSC0003DMG400000211	2.728	1.77e-09	6.37e-09	UP
bHLH	PGSC0003DMG400000232	1.2079	1.27e-11	5.24e-11	UP
HB	PGSC0003DMG400000248	1.5498	1.25e-23	9.55e-23	UP
MYB	PGSC0003DMG400000340	2.9861	0.0016274	0.0034476	UP
AP2-EREBP	PGSC0003DMG400000365	3.606	3.31e-08	1.08e-07	UP
HB	PGSC0003DMG400000498	1.0015	7.84e-16	4.1e-15	UP
bHLH	PGSC0003DMG400000711	4.1254	3.16e-43	5.36e-42	UP
AP2-EREBP	PGSC0003DMG400000811	4.2348	2.35e-18	1.4e-17	UP
G2-like	PGSC0003DMG400000922	4.6496	7.58e-38	1.04e-36	UP
C2H2	PGSC0003DMG400000998	1.2507	4.23e-07	1.27e-06	UP
TUB	PGSC0003DMG400001114	1.2175	4.72e-19	2.91e-18	UP
Tify	PGSC0003DMG400001174	4.9508	2.07e-24	1.63e-23	UP
Tify	PGSC0003DMG400001178	4.2534	1e-14	4.93e-14	UP
E2F-DP	PGSC0003DMG400001296	2.6585	4.8e-57	1.27e-55	UP
AP2-EREBP	PGSC0003DMG400001343	1.3605	0.0072474	0.014118	UP
MADS	PGSC0003DMG400001378	4.1249	0.0033934	0.0068929	UP
Orphans	PGSC0003DMG400001398	1.0009	0.00043988	0.00099364	UP
Orphans	PGSC0003DMG400001399	1.6847	6.06e-22	4.28e-21	UP
HB	PGSC0003DMG400001565	2.5722	1.63e-76	7.64e-75	UP
HMG	PGSC0003DMG400001567	1.5239	2.87e-34	3.43e-33	UP
CSD	PGSC0003DMG400001590	1.5631	2.66e-22	1.91e-21	UP
bZIP	PGSC0003DMG400001659	1.8999	1.18e-49	2.47e-48	UP
SWI/SNF-BAF60b	PGSC0003DMG400001965	1.5402	6.7e-11	2.65e-10	UP
AP2-EREBP	PGSC0003DMG400002272	6.1289	1.8e-37	2.42e-36	UP
C2C2-GATA	PGSC0003DMG400002337	2.8703	1.89e-32	2.11e-31	UP
AP2-EREBP	PGSC0003DMG400002350	5.1591	2.65e-41	4.15e-40	UP
C2H2	PGSC0003DMG400002383	2.9261	1.77e-10	6.85e-10	UP
HB	PGSC0003DMG400002627	1.3893	1.74e-09	6.27e-09	UP
Trihelix	PGSC0003DMG400002710	1.1705	1.91e-17	1.09e-16	UP
Tify	PGSC0003DMG400002930	3.9916	7.84e-55	1.93e-53	UP
Orphans	PGSC0003DMG400003084	1.8339	1.99e-06	5.62e-06	UP
C2C2-GATA	PGSC0003DMG400003126	2.0675	1.71e-29	1.68e-28	UP
MYB	PGSC0003DMG400003316	1.6711	1.4e-42	2.29e-41	UP
Orphans	PGSC0003DMG400003625	1.1953	0.00024963	0.00057808	UP
bZIP	PGSC0003DMG400003701	1.147	2.72e-14	1.31e-13	UP
HB	PGSC0003DMG400003751	1.5772	9.77e-17	5.36e-16	UP
E2F-DP	PGSC0003DMG400003778	3.2234	2.63e-48	5.3e-47	UP
MYB	PGSC0003DMG400003890	1.7297	0.0016312	0.0034543	UP
Trihelix	PGSC0003DMG400003964	2.5426	2.82e-92	2.02e-90	UP
AP2-EREBP	PGSC0003DMG400004005	2.4192	1.93e-70	7.66e-69	UP
bHLH	PGSC0003DMG400004011	3.6693	8.87e-21	5.92e-20	UP
bHLH	PGSC0003DMG400004061	1.9392	6.13e-47	1.19e-45	UP
bHLH	PGSC0003DMG400004087	4.1863	2.39e-67	8.62e-66	UP
SET	PGSC0003DMG400004289	1.6864	1.28e-11	5.29e-11	UP
TRAF	PGSC0003DMG400004349	1.2947	1.82e-26	1.58e-25	UP
Tify	PGSC0003DMG400004367	4.2167	1.31e-29	1.29e-28	UP
MYB	PGSC0003DMG400004371	3.9893	2.45e-06	6.88e-06	UP
Trihelix	PGSC0003DMG400004470	1.5928	3.74e-23	2.78e-22	UP
AP2-EREBP	PGSC0003DMG400004538	4.9869	5.64e-22	3.99e-21	UP
C2C2-GATA	PGSC0003DMG400004624	1.4049	2.24e-10	8.61e-10	UP
Orphans	PGSC0003DMG400004643	1.8321	2.55e-07	7.77e-07	UP
BSD	PGSC0003DMG400004912	1.0361	3.43e-12	1.47e-11	UP
C2H2	PGSC0003DMG400005147	2.0872	1.14e-15	5.91e-15	UP
bZIP	PGSC0003DMG400005476	4.12	5.38e-82	2.87e-80	UP
MYB	PGSC0003DMG400005641	4.6327	1.35e-90	9.23e-89	UP
WRKY	PGSC0003DMG400005835	1.7849	8.74e-08	2.77e-07	UP
bHLH	PGSC0003DMG400005860	3.7208	3.37e-18	1.99e-17	UP
EIL	PGSC0003DMG400005914	1.4634	3.08e-34	3.68e-33	UP
MYB	PGSC0003DMG400006176	1.5167	1.1e-09	4.01e-09	UP
AP2-EREBP	PGSC0003DMG400006369	3.3247	6.54e-53	1.53e-51	UP
C2H2	PGSC0003DMG400006417	2.2639	2.97e-31	3.14e-30	UP
TRAF	PGSC0003DMG400006428	1.076	3.85e-08	1.25e-07	UP
CCAAT	PGSC0003DMG400006441	1.4233	1.6e-29	1.58e-28	UP
HSF	PGSC0003DMG400006447	3.191	2.5e-27	2.25e-26	UP
Tify	PGSC0003DMG400006480	6.6335	9.11e-10	3.35e-09	UP
GNAT	PGSC0003DMG400006777	1.3827	2.83e-25	2.32e-24	UP
C3H	PGSC0003DMG400006803	1.9508	1.14e-59	3.28e-58	UP
LOB	PGSC0003DMG400006914	2.8145	6.7e-16	3.53e-15	UP
bHLH	PGSC0003DMG400007010	1.9968	3.34e-41	5.21e-40	UP
bHLH	PGSC0003DMG400007092	1.1587	1.16e-09	4.24e-09	UP
DDT	PGSC0003DMG400007126	3.0077	1.44e-14	7.06e-14	UP
bZIP	PGSC0003DMG400007301	1.5572	2.36e-17	1.34e-16	UP
mTERF	PGSC0003DMG400007323	1.0661	1.58e-09	5.72e-09	UP
LOB	PGSC0003DMG400007503	3.2033	4.28e-08	1.39e-07	UP
C2C2-Dof	PGSC0003DMG400007506	2.641	1.68e-57	4.52e-56	UP
bHLH	PGSC0003DMG400007559	1.0211	8.02e-09	2.75e-08	UP
WRKY	PGSC0003DMG400007788	2.1395	0.00014938	0.00035397	UP
DBP	PGSC0003DMG400007819	2.4895	3.36e-72	1.39e-70	UP
bHLH	PGSC0003DMG400007827	1.6796	1.52e-15	7.82e-15	UP
mTERF	PGSC0003DMG400007874	2.8165	4.48e-41	6.95e-40	UP
WRKY	PGSC0003DMG400007947	3.0268	1.22e-105	1.23e-103	UP
AP2-EREBP	PGSC0003DMG400007951	2.6706	2.81e-07	8.53e-07	UP
HSF	PGSC0003DMG400007962	1.5863	1.93e-06	5.45e-06	UP
MYB	PGSC0003DMG400007994	3.363	0.00023175	0.0005383	UP
TRAF	PGSC0003DMG400008160	2.6185	2.39e-06	6.72e-06	UP
AP2-EREBP	PGSC0003DMG400008248	3.3644	0.00090199	0.0019672	UP
AP2-EREBP	PGSC0003DMG400008265	4.6106	8.39e-05	0.00020394	UP
MYB	PGSC0003DMG400008337	1.1733	0.0066645	0.013046	UP
GRAS	PGSC0003DMG400008442	1.2501	2.82e-17	1.59e-16	UP
AP2-EREBP	PGSC0003DMG400008538	5.6062	4.47e-06	1.23e-05	UP
MYB	PGSC0003DMG400008761	3.2599	4.29e-10	1.61e-09	UP
Tify	PGSC0003DMG400008782	4.102	4.5e-24	3.48e-23	UP
MYB	PGSC0003DMG400008834	2.4232	7.94e-08	2.52e-07	UP
ABI3VP1	PGSC0003DMG400008936	4.8212	2.61e-193	1.69e-190	UP
GNAT	PGSC0003DMG400008956	1.0196	6.26e-08	2e-07	UP
GNAT	PGSC0003DMG400008977	1.9324	4.99e-34	5.9e-33	UP
MYB	PGSC0003DMG400009033	4.3568	2.75e-178	1.25e-175	UP
WRKY	PGSC0003DMG400009051	2.9036	7.32e-62	2.24e-60	UP
Sigma70-like	PGSC0003DMG400009072	1.9157	8.22e-10	3.03e-09	UP
WRKY	PGSC0003DMG400009103	5.2702	0.002378	0.0049374	UP
AP2-EREBP	PGSC0003DMG400009142	2.3978	9.49e-16	4.94e-15	UP
G2-like	PGSC0003DMG400009304	3.3832	2.75e-69	1.05e-67	UP
MADS	PGSC0003DMG400009363	1.4446	2.13e-23	1.61e-22	UP
TCP	PGSC0003DMG400009406	2.2822	0.0016046	0.0034009	UP
AP2-EREBP	PGSC0003DMG400009475	2.3598	5.05e-76	2.33e-74	UP
WRKY	PGSC0003DMG400009530	2.6586	2.17e-82	1.17e-80	UP
WRKY	PGSC0003DMG400009703	4.865	1.28e-100	1.14e-98	UP
SWI/SNF-BAF60b	PGSC0003DMG400009782	2.8006	2.18e-31	2.32e-30	UP
C3H	PGSC0003DMG400009821	1.7995	3.82e-40	5.73e-39	UP
RWP-RK	PGSC0003DMG400009909	1.4879	5.91e-18	3.45e-17	UP
PLATZ	PGSC0003DMG400009931	1.9642	2.62e-05	6.72e-05	UP
Orphans	PGSC0003DMG400010041	1.385	5.93e-28	5.48e-27	UP
G2-like	PGSC0003DMG400010067	5.9173	1.37e-55	3.47e-54	UP
GRAS	PGSC0003DMG400010121	1.4622	7.56e-27	6.67e-26	UP
bHLH	PGSC0003DMG400010388	3.382	2.7e-21	1.84e-20	UP
HB	PGSC0003DMG400010401	1.1393	0.00073751	0.0016237	UP
C3H	PGSC0003DMG400010493	1.4372	7.26e-27	6.41e-26	UP
AP2-EREBP	PGSC0003DMG400010724	3.8959	0.00047993	0.0010793	UP
Alfin-like	PGSC0003DMG400011022	1.1738	7.32e-15	3.64e-14	UP
bHLH	PGSC0003DMG400011133	1.7091	2.52e-12	1.09e-11	UP
MYB	PGSC0003DMG400011243	5.9253	3.22e-11	1.3e-10	UP
TUB	PGSC0003DMG400011352	1.8885	3.93e-52	9.05e-51	UP
C2H2	PGSC0003DMG400011365	1.641	6.89e-06	1.86e-05	UP
C3H	PGSC0003DMG400011414	1.373	2.27e-25	1.87e-24	UP
WRKY	PGSC0003DMG400011633	4.3284	9.32e-32	1.01e-30	UP
TRAF	PGSC0003DMG400011639	3.0905	2.65e-23	1.99e-22	UP
HB	PGSC0003DMG400011810	1.6376	7.67e-19	4.68e-18	UP
C2H2	PGSC0003DMG400011873	1.4338	0.00060341	0.001341	UP
NAC	PGSC0003DMG400011891	1.162	1.32e-12	5.79e-12	UP
C2C2-GATA	PGSC0003DMG400012014	1.6214	0.0013258	0.002837	UP
GRAS	PGSC0003DMG400012071	1.6952	6.02e-08	1.93e-07	UP
AP2-EREBP	PGSC0003DMG400012154	3.7737	9.24e-75	4.09e-73	UP
WRKY	PGSC0003DMG400012160	3.1648	1.51e-05	3.96e-05	UP
Orphans	PGSC0003DMG400012193	4.853	0.00039771	0.00090181	UP
bHLH	PGSC0003DMG400012237	4.7625	1.14e-20	7.59e-20	UP
AP2-EREBP	PGSC0003DMG400012305	3.5144	8.29e-32	8.99e-31	UP
WRKY	PGSC0003DMG400012318	4.2379	3.98e-07	1.19e-06	UP
bZIP	PGSC0003DMG400012436	4.1934	1.95e-09	7.01e-09	UP
AP2-EREBP	PGSC0003DMG400012526	2.0535	0.0018858	0.0039637	UP
LOB	PGSC0003DMG400012629	2.0766	5.29e-23	3.92e-22	UP
LOB	PGSC0003DMG400012653	4.5051	5.06e-23	3.75e-22	UP
bZIP	PGSC0003DMG400012660	1.2734	7.76e-19	4.74e-18	UP
OFP	PGSC0003DMG400012688	2.7844	1.93e-06	5.46e-06	UP
AP2-EREBP	PGSC0003DMG400012828	1.8835	1.17e-16	6.4e-16	UP
zf-HD	PGSC0003DMG400012913	4.7545	0.0082355	0.015924	UP
zf-HD	PGSC0003DMG400013213	1.6538	2.52e-18	1.5e-17	UP
GRAS	PGSC0003DMG400013356	1.0903	1.89e-15	9.7e-15	UP
AP2-EREBP	PGSC0003DMG400013402	5.1572	3.38e-09	1.19e-08	UP
MYB	PGSC0003DMG400013405	2.062	2.29e-05	5.88e-05	UP
CCAAT	PGSC0003DMG400013436	3.0228	1.24e-44	2.21e-43	UP
AP2-EREBP	PGSC0003DMG400014157	4.3873	1.39e-57	3.76e-56	UP
AP2-EREBP	PGSC0003DMG400014240	5.3236	4.59e-23	3.41e-22	UP
MYB	PGSC0003DMG400014550	6.0801	2.91e-10	1.11e-09	UP
AP2-EREBP	PGSC0003DMG400014594	3.8799	2.25e-33	2.6e-32	UP
AP2-EREBP	PGSC0003DMG400014598	4.6886	1.16e-18	6.98e-18	UP
RWP-RK	PGSC0003DMG400014662	2.3635	4.66e-05	0.00011621	UP
GNAT	PGSC0003DMG400014771	3.7634	1.53e-12	6.68e-12	UP
GNAT	PGSC0003DMG400014772	4.4976	9.62e-29	9.16e-28	UP
GNAT	PGSC0003DMG400014774	4.8416	6.77e-09	2.34e-08	UP
GNAT	PGSC0003DMG400014778	4.6805	5.44e-17	3.03e-16	UP
Jumonji	PGSC0003DMG400014791	4.8276	5.14e-129	9.36e-127	UP
HSF	PGSC0003DMG400014811	1.2641	1.77e-10	6.85e-10	UP
WRKY	PGSC0003DMG400015015	1.7927	5.92e-27	5.25e-26	UP
WRKY	PGSC0003DMG400015104	3.043	1.21e-05	3.2e-05	UP
C3H	PGSC0003DMG400015168	1.2576	3.59e-23	2.67e-22	UP
TAZ	PGSC0003DMG400015229	4.1892	7.3e-25	5.84e-24	UP
NAC	PGSC0003DMG400015342	3.1838	2.06e-110	2.33e-108	UP
SNF2	PGSC0003DMG400015477	3.6748	8.04e-59	2.25e-57	UP
C2H2	PGSC0003DMG400015533	5.1057	0.0051984	0.010314	UP
C2H2	PGSC0003DMG400015534	5.6017	1.12e-05	2.98e-05	UP
HB	PGSC0003DMG400015622	2.5215	3.71e-37	4.95e-36	UP
Tify	PGSC0003DMG400015667	4.6619	1.21e-40	1.85e-39	UP
C2H2	PGSC0003DMG400015791	1.0113	1.14e-14	5.6e-14	UP
AP2-EREBP	PGSC0003DMG400015889	1.1486	1.51e-05	3.95e-05	UP
AP2-EREBP	PGSC0003DMG400015890	2.0801	0.0070986	0.013839	UP
AP2-EREBP	PGSC0003DMG400016003	4.5712	2.22e-96	1.79e-94	UP
AP2-EREBP	PGSC0003DMG400016006	3.126	9.1e-59	2.55e-57	UP
C2C2-Dof	PGSC0003DMG400016116	4.6028	0.00031575	0.00072337	UP
AP2-EREBP	PGSC0003DMG400016196	3.7973	4.35e-50	9.32e-49	UP
HSF	PGSC0003DMG400016270	1.5311	1.1e-35	1.39e-34	UP
Orphans	PGSC0003DMG400016284	2.7385	2.29e-106	2.34e-104	UP
MYB	PGSC0003DMG400016292	1.9422	7.59e-10	2.8e-09	UP
E2F-DP	PGSC0003DMG400016418	2.2451	5.47e-51	1.21e-49	UP
WRKY	PGSC0003DMG400016441	4.9482	4.9e-32	5.37e-31	UP
WRKY	PGSC0003DMG400016769	3.495	8.17e-75	3.62e-73	UP
HB	PGSC0003DMG400016790	2.0547	1.6e-59	4.57e-58	UP
Orphans	PGSC0003DMG400016890	1.2305	1.29e-15	6.65e-15	UP
SET	PGSC0003DMG400017176	2.8756	1.16e-75	5.29e-74	UP
Orphans	PGSC0003DMG400017186	1.6373	2.64e-16	1.42e-15	UP
MYB	PGSC0003DMG400017223	3.4026	3.55e-59	1e-57	UP
AP2-EREBP	PGSC0003DMG400017231	5.6763	3.24e-67	1.16e-65	UP
AP2-EREBP	PGSC0003DMG400017233	5.1243	1.73e-17	9.86e-17	UP
HSF	PGSC0003DMG400017334	1.9396	5.1e-06	1.39e-05	UP
WRKY	PGSC0003DMG400017349	2.0526	1.25e-08	4.22e-08	UP
bHLH	PGSC0003DMG400017440	5.9935	9.64e-05	0.00023309	UP
NAC	PGSC0003DMG400017567	1.2135	3.92e-20	2.54e-19	UP
PBF-2-like	PGSC0003DMG400017627	1.5744	2.18e-12	9.42e-12	UP
C2H2	PGSC0003DMG400018243	1.3793	2.65e-21	1.81e-20	UP
Alfin-like	PGSC0003DMG400018261	1.4241	5.79e-22	4.09e-21	UP
ULT	PGSC0003DMG400018322	1.9016	1.18e-37	1.6e-36	UP
MYB	PGSC0003DMG400018331	4.1694	2.13e-63	6.83e-62	UP
AP2-EREBP	PGSC0003DMG400018352	2.5658	9.3e-17	5.11e-16	UP
ABI3VP1	PGSC0003DMG400018369	3.1099	2.34e-12	1.01e-11	UP
MYB	PGSC0003DMG400018427	2.8183	3.08e-05	7.84e-05	UP
mTERF	PGSC0003DMG400018430	1.6978	5.12e-08	1.65e-07	UP
NAC	PGSC0003DMG400018435	4.2862	3.38e-49	6.98e-48	UP
mTERF	PGSC0003DMG400018453	2.3364	4.87e-10	1.82e-09	UP
Jumonji	PGSC0003DMG400018506	3.7587	3.1e-09	1.1e-08	UP
HB	PGSC0003DMG400018509	1.0341	1.46e-10	5.69e-10	UP
MYB	PGSC0003DMG400018588	4.1923	2.48e-07	7.58e-07	UP
AP2-EREBP	PGSC0003DMG400018803	1.4152	1.08e-17	6.23e-17	UP
C2H2	PGSC0003DMG400019124	1.1214	1.24e-05	3.27e-05	UP
Alfin-like	PGSC0003DMG400019178	1.1159	5.66e-12	2.39e-11	UP
GRAS	PGSC0003DMG400019232	3.3574	2.49e-107	2.61e-105	UP
NAC	PGSC0003DMG400019294	3.7886	1.01e-73	4.34e-72	UP
AUX/IAA	PGSC0003DMG400019333	1.3304	1.73e-06	4.91e-06	UP
TRAF	PGSC0003DMG400019403	1.4412	1.99e-26	1.73e-25	UP
WRKY	PGSC0003DMG400019408	5.4966	2.03e-15	1.04e-14	UP
bZIP	PGSC0003DMG400019455	1.1048	1.35e-09	4.89e-09	UP
NAC	PGSC0003DMG400019523	1.2899	4.59e-07	1.37e-06	UP
zf-HD	PGSC0003DMG400019534	4.3037	1.56e-12	6.79e-12	UP
MYB	PGSC0003DMG400019535	2.6645	0.00075775	0.0016669	UP
OFP	PGSC0003DMG400019628	4.0105	4.22e-05	0.00010572	UP
E2F-DP	PGSC0003DMG400019629	1.4515	1.98e-11	8.08e-11	UP
AP2-EREBP	PGSC0003DMG400019693	5.713	7.6e-36	9.61e-35	UP
FHA	PGSC0003DMG400019743	2.0327	3.98e-37	5.31e-36	UP
GNAT	PGSC0003DMG400019822	4.8921	6.29e-05	0.00015513	UP
WRKY	PGSC0003DMG400019824	4.7012	1.61e-12	7.01e-12	UP
MYB	PGSC0003DMG400020012	7.2654	1.7e-21	1.17e-20	UP
bHLH	PGSC0003DMG400020066	1.7019	1.04e-42	1.71e-41	UP
Trihelix	PGSC0003DMG400020098	1.9158	2.55e-24	1.99e-23	UP
AUX/IAA	PGSC0003DMG400020139	4.1144	0.0069599	0.013584	UP
MYB	PGSC0003DMG400020338	2.9985	1.13e-45	2.09e-44	UP
MYB	PGSC0003DMG400020344	1.307	2.09e-12	9.05e-12	UP
bHLH	PGSC0003DMG400020427	1.2622	0.00010723	0.00025804	UP
WRKY	PGSC0003DMG400020432	1.7542	7.1e-14	3.35e-13	UP
Trihelix	PGSC0003DMG400020508	1.2181	1.64e-19	1.04e-18	UP
IWS1	PGSC0003DMG400020602	1.2368	2.67e-21	1.82e-20	UP
ABI3VP1	PGSC0003DMG400020648	1.4533	1.61e-05	4.21e-05	UP
C3H	PGSC0003DMG400020665	2.1475	9.17e-18	5.31e-17	UP
S1Fa-like	PGSC0003DMG400020934	1.6234	2.87e-07	8.71e-07	UP
TAZ	PGSC0003DMG400021422	1.7954	4.61e-12	1.95e-11	UP
C2H2	PGSC0003DMG400021508	3.4477	1.24e-79	6.25e-78	UP
LOB	PGSC0003DMG400021509	1.3338	0.0041801	0.0083902	UP
bHLH	PGSC0003DMG400021717	1.3077	1.55e-17	8.86e-17	UP
WRKY	PGSC0003DMG400021895	3.5723	8.38e-99	7.24e-97	UP
SBP	PGSC0003DMG400021902	2.3323	0.0014704	0.0031295	UP
WRKY	PGSC0003DMG400022063	5.0766	1.71e-38	2.41e-37	UP
TRAF	PGSC0003DMG400022260	2.0375	4.54e-47	8.83e-46	UP
MYB	PGSC0003DMG400022399	4.5868	1.6e-138	3.49e-136	UP
HSF	PGSC0003DMG400022405	4.0977	1.19e-175	5.14e-173	UP
CCAAT	PGSC0003DMG400022680	4.8101	3.03e-10	1.15e-09	UP
MADS	PGSC0003DMG400022748	1.7563	1.12e-13	5.24e-13	UP
AP2-EREBP	PGSC0003DMG400022759	2.1737	0.0019487	0.0040891	UP
AP2-EREBP	PGSC0003DMG400022823	2.0942	3.14e-15	1.6e-14	UP
Tify	PGSC0003DMG400022888	2.8787	1.29e-77	6.2e-76	UP
Orphans	PGSC0003DMG400022983	1.6509	1.67e-06	4.75e-06	UP
CPP	PGSC0003DMG400023147	3.6403	9.46e-31	9.76e-30	UP
SWI/SNF-BAF60b	PGSC0003DMG400023191	4.5804	0.0088207	0.01696	UP
CSD	PGSC0003DMG400023206	1.7643	0.005704	0.011249	UP
SBP	PGSC0003DMG400023260	1.0784	7.63e-06	2.05e-05	UP
AP2-EREBP	PGSC0003DMG400023295	5.7947	1.87e-75	8.44e-74	UP
Orphans	PGSC0003DMG400023402	1.0843	3.49e-17	1.96e-16	UP
MYB	PGSC0003DMG400023405	2.9949	1.49e-42	2.45e-41	UP
C2C2-GATA	PGSC0003DMG400023434	1.235	1.94e-15	9.94e-15	UP
DDT	PGSC0003DMG400023442	1.5984	5.73e-24	4.42e-23	UP
C2H2	PGSC0003DMG400023547	5.5411	0.0025193	0.0052141	UP
MYB	PGSC0003DMG400023570	3.071	0.0084908	0.016385	UP
bHLH	PGSC0003DMG400023577	6.8831	1.57e-11	6.45e-11	UP
AP2-EREBP	PGSC0003DMG400023593	4.9946	8.09e-16	4.23e-15	UP
C2H2	PGSC0003DMG400023684	1.4046	4.55e-10	1.71e-09	UP
HB	PGSC0003DMG400023707	1.2305	2.85e-06	7.95e-06	UP
C3H	PGSC0003DMG400023710	1.3884	7.07e-27	6.25e-26	UP
LOB	PGSC0003DMG400023939	6.8335	1.33e-13	6.16e-13	UP
TUB	PGSC0003DMG400024102	1.0364	2.46e-12	1.06e-11	UP
TCP	PGSC0003DMG400024254	1.1369	0.0050614	0.010052	UP
HB	PGSC0003DMG400024267	1.6552	9.35e-30	9.27e-29	UP
LIM	PGSC0003DMG400024481	1.3673	2.09e-25	1.72e-24	UP
GRAS	PGSC0003DMG400024781	3.1742	3.17e-42	5.13e-41	UP
C2C2-GATA	PGSC0003DMG400024783	2.9449	5.18e-17	2.89e-16	UP
WRKY	PGSC0003DMG400024961	4.9074	5.05e-234	9.62e-231	UP
CCAAT	PGSC0003DMG400025012	1.4234	2.7e-24	2.11e-23	UP
Orphans	PGSC0003DMG400025024	1.6364	1.22e-11	5.06e-11	UP
bHLH	PGSC0003DMG400025263	1.3547	1.15e-22	8.35e-22	UP
MYB	PGSC0003DMG400025303	2.1151	1.07e-13	4.98e-13	UP
C2C2-Dof	PGSC0003DMG400025372	1.2235	2.08e-05	5.39e-05	UP
LOB	PGSC0003DMG400025384	1.3312	0.00016267	0.0003843	UP
LOB	PGSC0003DMG400025400	4.8694	1.45e-59	4.15e-58	UP
WRKY	PGSC0003DMG400025481	1.3151	8.23e-07	2.41e-06	UP
C3H	PGSC0003DMG400025515	3.1419	2.82e-46	5.31e-45	UP
AP2-EREBP	PGSC0003DMG400025582	6.6741	9.48e-15	4.68e-14	UP
LOB	PGSC0003DMG400025752	2.4714	1.29e-06	3.72e-06	UP
ABI3VP1	PGSC0003DMG400025792	2.0403	0.003803	0.007672	UP
AP2-EREBP	PGSC0003DMG400025797	4.4885	0.00088635	0.0019343	UP
AP2-EREBP	PGSC0003DMG400025989	1.5647	6.11e-13	2.74e-12	UP
AP2-EREBP	PGSC0003DMG400026035	2.568	1.47e-08	4.93e-08	UP
DBP	PGSC0003DMG400026085	2.6069	1.11e-54	2.72e-53	UP
TCP	PGSC0003DMG400026105	1.3298	0.0002834	0.00065271	UP
GNAT	PGSC0003DMG400026128	2.2258	1.51e-63	4.87e-62	UP
bHLH	PGSC0003DMG400026164	2.1077	0.00054266	0.0012119	UP
GeBP	PGSC0003DMG400026193	1.8888	3.02e-36	3.88e-35	UP
GeBP	PGSC0003DMG400026196	2.1868	3.69e-39	5.34e-38	UP
AP2-EREBP	PGSC0003DMG400026260	4.53	1.58e-41	2.49e-40	UP
AP2-EREBP	PGSC0003DMG400026261	4.5712	6.4e-18	3.73e-17	UP
GNAT	PGSC0003DMG400026301	4.1937	3.23e-111	3.72e-109	UP
CCAAT	PGSC0003DMG400026357	1.0155	2.97e-08	9.79e-08	UP
SBP	PGSC0003DMG400026736	1.5218	0.002638	0.0054494	UP
AP2-EREBP	PGSC0003DMG400026821	2.28	4.83e-69	1.83e-67	UP
HB	PGSC0003DMG400027030	6.1824	0.0028503	0.0058554	UP
HSF	PGSC0003DMG400027036	1.3308	1.47e-15	7.56e-15	UP
MYB	PGSC0003DMG400027077	2.1197	0.00018538	0.00043526	UP
AP2-EREBP	PGSC0003DMG400027117	1.1732	1.58e-10	6.11e-10	UP
LIM	PGSC0003DMG400027131	1.0237	2.9e-13	1.32e-12	UP
C2C2-GATA	PGSC0003DMG400027167	1.9705	2.59e-16	1.39e-15	UP
C3H	PGSC0003DMG400027176	2.2515	1.38e-70	5.48e-69	UP
WRKY	PGSC0003DMG400027208	4.5963	3.68e-13	1.67e-12	UP
HSF	PGSC0003DMG400027283	4.8351	6.57e-54	1.57e-52	UP
LOB	PGSC0003DMG400027372	4.1225	1.15e-44	2.07e-43	UP
Trihelix	PGSC0003DMG400027438	1.3516	9.22e-24	7.06e-23	UP
AP2-EREBP	PGSC0003DMG400027502	3.4753	1.08e-07	3.41e-07	UP
mTERF	PGSC0003DMG400027538	2.2707	0.0024811	0.0051395	UP
mTERF	PGSC0003DMG400027539	2.0593	4.07e-14	1.94e-13	UP
mTERF	PGSC0003DMG400027558	1.8327	9.28e-12	3.87e-11	UP
mTERF	PGSC0003DMG400027560	1.1724	4.03e-11	1.62e-10	UP
bZIP	PGSC0003DMG400027599	1.368	7.87e-19	4.8e-18	UP
HB	PGSC0003DMG400027770	1.4969	9.91e-05	0.00023921	UP
ARF	PGSC0003DMG400027798	1.0932	0.00057409	0.0012795	UP
BES1	PGSC0003DMG400027820	2.6661	3.92e-52	9.04e-51	UP
BES1	PGSC0003DMG400027849	2.348	2.01e-64	6.61e-63	UP
MYB	PGSC0003DMG400028119	4.9136	3.36e-65	1.14e-63	UP
Jumonji	PGSC0003DMG400028132	3.2145	8.08e-82	4.29e-80	UP
ABI3VP1	PGSC0003DMG400028159	4.3878	6.65e-20	4.26e-19	UP
Trihelix	PGSC0003DMG400028172	1.5934	0.00071354	0.0015744	UP
C2H2	PGSC0003DMG400028323	2.5914	6.6e-06	1.79e-05	UP
WRKY	PGSC0003DMG400028335	1.2034	3.31e-16	1.77e-15	UP
WRKY	PGSC0003DMG400028520	3.2982	1.37e-41	2.16e-40	UP
bHLH	PGSC0003DMG400028578	3.4616	1.79e-08	5.97e-08	UP
WRKY	PGSC0003DMG400028633	7.32	1.47e-15	7.56e-15	UP
PHD	PGSC0003DMG400028656	2.0496	3.47e-16	1.85e-15	UP
Tify	PGSC0003DMG400028800	7.689	2.23e-23	1.68e-22	UP
ARF	PGSC0003DMG400028826	1.5423	1.27e-38	1.81e-37	UP
G2-like	PGSC0003DMG400028830	5.5909	2.52e-10	9.64e-10	UP
Orphans	PGSC0003DMG400029237	4.3625	1.15e-177	5.12e-175	UP
WRKY	PGSC0003DMG400029371	2.8604	9.61e-43	1.59e-41	UP
C3H	PGSC0003DMG400029424	1.2373	7.88e-13	3.5e-12	UP
PLATZ	PGSC0003DMG400029466	5.5811	2.14e-64	7.04e-63	UP
AP2-EREBP	PGSC0003DMG400029713	1.9011	0.00032781	0.00074973	UP
Trihelix	PGSC0003DMG400030246	4.5506	1.09e-55	2.79e-54	UP
C2H2	PGSC0003DMG400030311	4.0785	6.18e-05	0.00015237	UP
AP2-EREBP	PGSC0003DMG400030472	2.6771	6.88e-63	2.18e-61	UP
DBP	PGSC0003DMG400030694	2.6507	2.3e-55	5.77e-54	UP
HB	PGSC0003DMG400030837	2.0096	2.79e-20	1.82e-19	UP
NAC	PGSC0003DMG400031071	1.5009	1.55e-33	1.79e-32	UP
zf-HD	PGSC0003DMG400031256	1.1598	1.04e-06	3.01e-06	UP
MYB	PGSC0003DMG400031317	1.4906	5.75e-18	3.36e-17	UP
mTERF	PGSC0003DMG400031415	1.5949	4.85e-13	2.19e-12	UP
HB	PGSC0003DMG400031777	1.0532	8.41e-05	0.00020457	UP
C2C2-GATA	PGSC0003DMG400031828	1.8142	1.06e-05	2.82e-05	UP
Orphans	PGSC0003DMG400032119	1.1731	1.32e-20	8.72e-20	UP
NAC	PGSC0003DMG400032555	4.5467	9.41e-74	4.05e-72	UP
NAC	PGSC0003DMG400033047	4.427	2.94e-26	2.53e-25	UP
AP2-EREBP	PGSC0003DMG400034101	3.0987	6.36e-63	2.02e-61	UP
C2H2	PGSC0003DMG400034322	3.8158	3.99e-36	5.09e-35	UP
AP2-EREBP	PGSC0003DMG400036493	4.3988	1.68e-19	1.06e-18	UP
MYB	PGSC0003DMG400038913	3.1486	0.0032006	0.0065277	UP
AP2-EREBP	PGSC0003DMG400041451	4.8192	1.61e-05	4.22e-05	UP
C2H2	PGSC0003DMG400041467	5.5561	0.00054511	0.0012173	UP
CSD	PGSC0003DMG400046044	1.2041	5.46e-19	3.36e-18	UP
CPP	PGSC0003DMG401000306	2.4136	1.66e-26	1.44e-25	UP
TRAF	PGSC0003DMG401000923	1.3644	4.56e-26	3.89e-25	UP
HSF	PGSC0003DMG401004023	1.0552	1.72e-15	8.82e-15	UP
bZIP	PGSC0003DMG401006188	1.2783	1.97e-18	1.18e-17	UP
bHLH	PGSC0003DMG401007955	3.4758	1.61e-17	9.22e-17	UP
E2F-DP	PGSC0003DMG401008915	1.8254	0.0099458	0.018977	UP
ARID	PGSC0003DMG401012197	1.6237	9.01e-20	5.73e-19	UP
bHLH	PGSC0003DMG401012339	1.2941	1.05e-12	4.65e-12	UP
RWP-RK	PGSC0003DMG401013613	1.8611	2.35e-05	6.04e-05	UP
S1Fa-like	PGSC0003DMG401017590	1.933	2.92e-41	4.56e-40	UP
bZIP	PGSC0003DMG401020784	2.4542	4.36e-24	3.37e-23	UP
bZIP	PGSC0003DMG401024930	1.1352	1.95e-08	6.49e-08	UP
TAZ	PGSC0003DMG401026984	4.6384	7.45e-28	6.86e-27	UP
mTERF	PGSC0003DMG401029813	1.2676	6.8e-05	0.00016707	UP
C2H2	PGSC0003DMG401030312	3.7739	7.19e-15	3.58e-14	UP
C2H2	PGSC0003DMG401030350	2.2472	8.55e-40	1.27e-38	UP
WRKY	PGSC0003DMG401033880	1.8086	7.5e-15	3.73e-14	UP
BSD	PGSC0003DMG402002368	1.1418	6.17e-14	2.92e-13	UP
AUX/IAA	PGSC0003DMG402002635	1.5363	1.69e-29	1.66e-28	UP
bZIP	PGSC0003DMG402002771	1.3299	0.0018287	0.0038489	UP
MYB	PGSC0003DMG402004611	3.8818	3.45e-12	1.48e-11	UP
RWP-RK	PGSC0003DMG402012256	1.071	6.49e-13	2.9e-12	UP
NAC	PGSC0003DMG402023373	2.1369	2.79e-67	1e-65	UP
E2F-DP	PGSC0003DMG402024469	6.5463	1.79e-23	1.35e-22	UP
RWP-RK	PGSC0003DMG402032501	2.0919	4.37e-14	2.08e-13	UP
CAMTA	Novel00244	-0.66643	4.26e-08	1.38e-07	DOWN
TRAF	Novel00278	-1.2968	1.35e-22	9.84e-22	DOWN
PHD	Novel00303	-1.6997	1.63e-36	2.12e-35	DOWN
ABI3VP1	Novel00398	-2.0235	2.11e-18	1.26e-17	DOWN
ARID	Novel00410	-0.37119	0.0036308	0.0073486	DOWN
C2H2	Novel00412	-2.1811	5.81e-26	4.93e-25	DOWN
SET	Novel00429	0.96201	0.00019027	0.00044626	UP
C2H2	Novel00437	-1.7504	0.000356	0.00081154	DOWN
TAZ	Novel00438	-0.35123	0.0020379	0.0042678	DOWN
MYB	Novel00535	-1.3411	2.02e-24	1.59e-23	DOWN
C3H	Novel00564	-2.4552	5.37e-41	8.29e-40	DOWN
SET	Novel00594	-0.4643	0.00057054	0.0012719	DOWN
FAR1	Novel00600	-0.4285	0.00059837	0.0013305	DOWN
MBF1	Novel00669	-0.53618	4.68e-06	1.28e-05	DOWN
C2C2-GATA	Novel00700	0.49741	0.00043505	0.00098319	UP
ABI3VP1	Novel00728	-4.5118	6.89e-230	1.16e-226	DOWN
GNAT	Novel00849	0.64488	0.00034183	0.00078074	UP
SNF2	Novel00928	-0.51541	5.47e-05	0.00013566	DOWN
C2H2	Novel00938	-0.83263	1.33e-10	5.17e-10	DOWN
SNF2	Novel00982	-1.5399	1.62e-40	2.46e-39	DOWN
SWI/SNF-BAF60b	Novel00985	-0.39616	0.0040852	0.0082042	DOWN
DDT	Novel00991	-1.9075	8.95e-27	7.86e-26	DOWN
PHD	Novel01238	-2.3723	3.18e-67	1.14e-65	DOWN
C3H	Novel01318	0.9041	1.72e-10	6.65e-10	UP
CAMTA	Novel01353	-0.644	7.01e-07	2.06e-06	DOWN
Trihelix	Novel01383	-1.2428	1.55e-13	7.18e-13	DOWN
Alfin-like	Novel01390	0.51197	0.004289	0.0085955	UP
SNF2	Novel01425	-1.2254	5.68e-21	3.82e-20	DOWN
AP2-EREBP	Novel01437	-1.4122	3.08e-27	2.76e-26	DOWN
AUX/IAA	Novel01450	-1.8945	2.12e-51	4.75e-50	DOWN
CCAAT	Novel01527	-1.4244	1.5e-10	5.83e-10	DOWN
CCAAT	Novel01528	-2.4533	7.82e-53	1.83e-51	DOWN
FAR1	Novel01554	-3.5789	5.57e-23	4.12e-22	DOWN
SET	Novel01559	-2.6605	9.09e-96	7.18e-94	DOWN
C3H	Novel01563	-2.829	5.55e-110	6.17e-108	DOWN
bZIP	Novel01587	-1.1154	5.81e-17	3.22e-16	DOWN
FAR1	Novel01605	-1.0723	8.47e-05	0.00020581	DOWN
PHD	Novel01606	0.47443	0.00010139	0.00024457	UP
FHA	Novel01674	-0.8866	3.76e-09	1.33e-08	DOWN
Orphans	Novel01700	-2.5079	1.37e-16	7.47e-16	DOWN
PHD	Novel01716	0.68493	2.14e-07	6.55e-07	UP
C3H	Novel01723	-2.0821	6.96e-55	1.72e-53	DOWN
SNF2	Novel01766	-0.86439	1.03e-11	4.27e-11	DOWN
Jumonji	Novel01825	-1.001	1.5e-15	7.73e-15	DOWN
FAR1	Novel01849	-0.61077	0.00036279	0.00082631	DOWN
SNF2	Novel01888	0.92239	1.01e-12	4.48e-12	UP
SNF2	Novel01944	-1.3395	1.46e-21	1.01e-20	DOWN
TCP	Novel02049	-3.0984	3.09e-92	2.2e-90	DOWN
C3H	Novel02087	-2.7402	2.47e-114	3.09e-112	DOWN
MYB	Novel02121	-0.6698	1.13e-08	3.83e-08	DOWN
Trihelix	Novel02135	-1.7649	1.88e-40	2.85e-39	DOWN
SNF2	Novel02150	-2.8704	2.68e-66	9.37e-65	DOWN
G2-like	Novel02151	-2.0048	5.92e-40	8.83e-39	DOWN
CAMTA	Novel02158	-0.49052	2.15e-05	5.55e-05	DOWN
Pseudo ARR-B	Novel02298	0.78506	2.77e-11	1.12e-10	UP
bZIP	Novel02354	-0.87836	1.84e-11	7.55e-11	DOWN
HB	Novel02389	-0.83171	7.52e-09	2.59e-08	DOWN
MADS	Novel02537	-1.0161	5.59e-08	1.8e-07	DOWN
FAR1	Novel02739	0.4688	0.0013536	0.0028932	UP
PHD	Novel02744	-2.1583	0.0040804	0.0081957	DOWN
PHD	Novel02768	-0.94329	7.69e-09	2.64e-08	DOWN
C3H	Novel02809	-1.571	6.38e-07	1.88e-06	DOWN
MYB	Novel02814	-1.5208	2.18e-37	2.92e-36	DOWN
LUG	Novel02820	0.30659	0.0082928	0.016028	UP
CCAAT	Novel02850	-0.65044	1.33e-06	3.81e-06	DOWN
MYB	Novel02944	-1.5104	2.26e-33	2.6e-32	DOWN
GeBP	Novel02987	-2.2499	4.34e-62	1.34e-60	DOWN
MYB	Novel03095	0.51083	0.00036058	0.00082153	UP
FAR1	Novel03157	-0.55283	8.97e-06	2.4e-05	DOWN
bZIP	Novel03175	-3.1367	2.79e-140	6.44e-138	DOWN
SRS	Novel03238	-1.4846	1.99e-08	6.64e-08	DOWN
ABI3VP1	Novel03264	-0.5645	0.0022482	0.0046828	DOWN
FAR1	Novel03453	0.63272	0.00052059	0.001166	UP
PHD	Novel03481	-0.73316	3.24e-08	1.06e-07	DOWN
PHD	Novel03534	-0.40274	0.0012077	0.0025958	DOWN
FAR1	Novel03627	-1.9196	7.26e-42	1.16e-40	DOWN
MADS	PGSC0003DMG400000008	-0.67966	8.11e-05	0.00019763	DOWN
TRAF	PGSC0003DMG400000085	0.37225	0.002354	0.0048908	UP
bZIP	PGSC0003DMG400000088	-1.3851	3.37e-20	2.19e-19	DOWN
ABI3VP1	PGSC0003DMG400000118	-1.5848	1.12e-11	4.62e-11	DOWN
BES1	PGSC0003DMG400000169	0.41407	0.00073319	0.0016147	UP
MYB	PGSC0003DMG400000189	-2.4101	5.44e-79	2.71e-77	DOWN
C3H	PGSC0003DMG400000350	-2.8181	6.04e-108	6.47e-106	DOWN
C2C2-Dof	PGSC0003DMG400000441	-2.7526	1.08e-18	6.54e-18	DOWN
NAC	PGSC0003DMG400000555	-0.59757	4.12e-05	0.0001035	DOWN
C3H	PGSC0003DMG400000600	-0.68541	6.18e-07	1.83e-06	DOWN
PHD	PGSC0003DMG400000673	-0.97325	2.67e-10	1.02e-09	DOWN
SWI/SNF-SWI3	PGSC0003DMG400000702	-2.5383	1.37e-92	9.87e-91	DOWN
mTERF	PGSC0003DMG400000727	-0.83015	5.43e-05	0.00013471	DOWN
bZIP	PGSC0003DMG400000799	-0.60968	4.96e-05	0.00012347	DOWN
NAC	PGSC0003DMG400000809	0.66282	2.06e-06	5.83e-06	UP
G2-like	PGSC0003DMG400000828	-2.1077	4.91e-08	1.59e-07	DOWN
TRAF	PGSC0003DMG400000885	-2.1653	2.17e-38	3.05e-37	DOWN
DDT	PGSC0003DMG400000999	0.43983	0.00054848	0.0012246	UP
Rcd1-like	PGSC0003DMG400001086	-2.3561	1.33e-22	9.67e-22	DOWN
bHLH	PGSC0003DMG400001161	0.89273	6.92e-09	2.39e-08	UP
NAC	PGSC0003DMG400001323	-2.8012	4.55e-11	1.82e-10	DOWN
C2C2-Dof	PGSC0003DMG400001330	-1.8317	9.19e-37	1.21e-35	DOWN
MADS	PGSC0003DMG400001377	-2.6376	0.0044927	0.0089805	DOWN
Orphans	PGSC0003DMG400001397	0.32448	0.0078923	0.015296	UP
HMG	PGSC0003DMG400001414	-1.1949	4.88e-25	3.94e-24	DOWN
HB	PGSC0003DMG400001417	-3.6047	8.21e-90	5.48e-88	DOWN
WRKY	PGSC0003DMG400001434	-2.1062	0.00069873	0.0015436	DOWN
FHA	PGSC0003DMG400001473	-0.97362	1.47e-14	7.17e-14	DOWN
AUX/IAA	PGSC0003DMG400001498	-5.9923	1.82e-19	1.14e-18	DOWN
MYB	PGSC0003DMG400001504	-1.8013	2.23e-05	5.74e-05	DOWN
C2H2	PGSC0003DMG400001519	0.88303	2.03e-07	6.23e-07	UP
GRAS	PGSC0003DMG400001556	-1.362	1.48e-25	1.22e-24	DOWN
CSD	PGSC0003DMG400001591	0.84708	4.31e-13	1.95e-12	UP
C3H	PGSC0003DMG400001658	0.52162	2.79e-05	7.12e-05	UP
BBR/BPC	PGSC0003DMG400001660	-1.1262	1.71e-13	7.91e-13	DOWN
Trihelix	PGSC0003DMG400001696	0.47265	0.0061868	0.012156	UP
CCAAT	PGSC0003DMG400001733	-1.0703	1.28e-05	3.37e-05	DOWN
C2H2	PGSC0003DMG400001747	-1.0507	0.0039436	0.0079359	DOWN
MYB	PGSC0003DMG400001749	-4.2058	7.22e-37	9.54e-36	DOWN
SNF2	PGSC0003DMG400001851	-0.83431	2.5e-09	8.92e-09	DOWN
MYB	PGSC0003DMG400001913	-1.4	2.65e-06	7.42e-06	DOWN
G2-like	PGSC0003DMG400002144	-0.7171	0.0053227	0.010548	DOWN
AP2-EREBP	PGSC0003DMG400002235	-2.0652	2.26e-09	8.08e-09	DOWN
ABI3VP1	PGSC0003DMG400002392	-0.52841	0.00015126	0.00035828	DOWN
MYB	PGSC0003DMG400002481	-1.6222	2.6e-36	3.35e-35	DOWN
MYB	PGSC0003DMG400002489	0.92909	6.39e-11	2.53e-10	UP
C2H2	PGSC0003DMG400002495	0.6492	8.65e-08	2.74e-07	UP
C2C2-Dof	PGSC0003DMG400002507	-1.1828	8.08e-12	3.38e-11	DOWN
AUX/IAA	PGSC0003DMG400002608	-0.64855	0.00029533	0.00067897	DOWN
HB	PGSC0003DMG400002616	-2.054	6.12e-44	1.07e-42	DOWN
AUX/IAA	PGSC0003DMG400002632	-1.0992	1.58e-16	8.58e-16	DOWN
Trihelix	PGSC0003DMG400002727	-1.8665	6.33e-46	1.17e-44	DOWN
Trihelix	PGSC0003DMG400002728	-1.2516	0.0026605	0.0054923	DOWN
ABI3VP1	PGSC0003DMG400002784	0.93954	6.38e-05	0.00015704	UP
C2H2	PGSC0003DMG400002911	-0.33949	0.0044423	0.0088859	DOWN
GRAS	PGSC0003DMG400003047	-3.7442	5.24e-60	1.53e-58	DOWN
HSF	PGSC0003DMG400003053	-2.4858	0.0021527	0.0044938	DOWN
GNAT	PGSC0003DMG400003148	0.39302	0.0077833	0.015097	UP
HSF	PGSC0003DMG400003160	-1.4317	1.67e-30	1.7e-29	DOWN
ARR-B	PGSC0003DMG400003196	-0.92718	1.73e-13	8.01e-13	DOWN
GRF	PGSC0003DMG400003220	-4.7328	4.38e-22	3.12e-21	DOWN
MYB	PGSC0003DMG400003295	-1.7535	1.86e-14	9.06e-14	DOWN
CCAAT	PGSC0003DMG400003357	-0.56272	9.63e-06	2.57e-05	DOWN
C2H2	PGSC0003DMG400003372	-0.45482	0.0007998	0.0017551	DOWN
C2H2	PGSC0003DMG400003459	0.40276	0.0067357	0.013175	UP
zf-HD	PGSC0003DMG400003510	0.9831	0.002869	0.0058925	UP
BBR/BPC	PGSC0003DMG400003553	-1.1385	3.04e-14	1.46e-13	DOWN
GeBP	PGSC0003DMG400003572	0.41346	0.0029119	0.0059755	UP
Orphans	PGSC0003DMG400003578	-2.0361	7.05e-25	5.65e-24	DOWN
C3H	PGSC0003DMG400003622	-1.1225	6.44e-18	3.76e-17	DOWN
Orphans	PGSC0003DMG400003711	0.61604	1.46e-05	3.82e-05	UP
BBR/BPC	PGSC0003DMG400003719	-0.35426	0.0070886	0.013823	DOWN
PHD	PGSC0003DMG400003902	-1.4083	7.05e-29	6.74e-28	DOWN
NAC	PGSC0003DMG400003907	-0.58706	0.006512	0.012765	DOWN
IWS1	PGSC0003DMG400003992	-0.86394	1.33e-13	6.2e-13	DOWN
AP2-EREBP	PGSC0003DMG400004006	-1.2007	5.05e-13	2.27e-12	DOWN
SET	PGSC0003DMG400004008	-1.4943	1.36e-06	3.89e-06	DOWN
FHA	PGSC0003DMG400004020	-1.8078	0.00014424	0.00034238	DOWN
C2C2-Dof	PGSC0003DMG400004062	0.68052	2.58e-06	7.22e-06	UP
CCAAT	PGSC0003DMG400004076	0.55349	0.001311	0.0028065	UP
CCAAT	PGSC0003DMG400004299	0.62176	0.0092114	0.017667	UP
BES1	PGSC0003DMG400004501	-1.0949	1.21e-19	7.68e-19	DOWN
G2-like	PGSC0003DMG400004567	-2.4599	0.00052735	0.0011804	DOWN
HSF	PGSC0003DMG400004662	-4.6452	3.3e-242	9.44e-239	DOWN
HB	PGSC0003DMG400004714	-0.46772	0.0012024	0.0025856	DOWN
Alfin-like	PGSC0003DMG400004887	0.79228	2.6e-06	7.28e-06	UP
AP2-EREBP	PGSC0003DMG400004898	-0.61761	8.51e-08	2.7e-07	DOWN
GRF	PGSC0003DMG400004942	-1.3505	0.00054754	0.0012226	DOWN
HB	PGSC0003DMG400004953	-0.4663	0.00017941	0.00042191	DOWN
TRAF	PGSC0003DMG400004985	0.59404	0.00024536	0.00056852	UP
SBP	PGSC0003DMG400005196	-0.67168	4.49e-09	1.58e-08	DOWN
Orphans	PGSC0003DMG400005325	-0.4027	0.0039829	0.0080095	DOWN
WRKY	PGSC0003DMG400005329	-0.32257	0.0077258	0.014996	DOWN
C3H	PGSC0003DMG400005333	-0.60448	0.0010607	0.0022947	DOWN
Trihelix	PGSC0003DMG400005408	-2.9976	2.77e-35	3.43e-34	DOWN
HB	PGSC0003DMG400005466	-1.3837	5.22e-17	2.91e-16	DOWN
MYB	PGSC0003DMG400005626	0.71804	1.64e-06	4.68e-06	UP
C2C2-CO-like	PGSC0003DMG400005633	-4.0389	2.49e-06	7e-06	DOWN
C3H	PGSC0003DMG400005636	-2.0416	4.65e-38	6.42e-37	DOWN
MYB	PGSC0003DMG400005657	0.8353	1.06e-09	3.89e-09	UP
GRAS	PGSC0003DMG400005709	-0.8779	7.76e-06	2.09e-05	DOWN
ARF	PGSC0003DMG400005794	-0.91929	1.81e-10	6.99e-10	DOWN
RWP-RK	PGSC0003DMG400005871	0.91833	0.00035162	0.00080212	UP
NAC	PGSC0003DMG400005892	-1.9853	3.41e-05	8.62e-05	DOWN
EIL	PGSC0003DMG400005915	-0.5808	1.54e-06	4.41e-06	DOWN
HB	PGSC0003DMG400005930	-0.70331	5.3e-09	1.85e-08	DOWN
PHD	PGSC0003DMG400006006	-0.69045	9.75e-08	3.07e-07	DOWN
GRAS	PGSC0003DMG400006132	-2.2707	9.93e-29	9.45e-28	DOWN
Orphans	PGSC0003DMG400006145	-1.4233	1.65e-24	1.3e-23	DOWN
bZIP	PGSC0003DMG400006211	-2.9272	5.94e-20	3.81e-19	DOWN
bZIP	PGSC0003DMG400006345	-2.1455	9.73e-32	1.05e-30	DOWN
GRAS	PGSC0003DMG400006352	-0.46811	0.0015948	0.0033815	DOWN
mTERF	PGSC0003DMG400006355	-0.52551	0.0098159	0.018752	DOWN
TUB	PGSC0003DMG400006371	-2.2559	2.06e-70	8.17e-69	DOWN
AUX/IAA	PGSC0003DMG400006393	-0.6185	2.2e-07	6.75e-07	DOWN
C3H	PGSC0003DMG400006828	-3.0051	9.49e-133	1.86e-130	DOWN
CCAAT	PGSC0003DMG400006863	-0.64057	5.15e-07	1.53e-06	DOWN
Orphans	PGSC0003DMG400007061	0.72746	8.13e-05	0.00019806	UP
MBF1	PGSC0003DMG400007099	-1.4112	2.98e-12	1.28e-11	DOWN
CCAAT	PGSC0003DMG400007131	-4.6273	3.98e-15	2.01e-14	DOWN
SET	PGSC0003DMG400007185	-0.43437	0.00011524	0.00027632	DOWN
bZIP	PGSC0003DMG400007208	0.53875	0.0099622	0.019005	UP
CCAAT	PGSC0003DMG400007350	-0.99577	1.69e-14	8.26e-14	DOWN
GNAT	PGSC0003DMG400007382	-0.91576	0.0013346	0.0028542	DOWN
MYB	PGSC0003DMG400007603	-0.85909	1.73e-07	5.36e-07	DOWN
PLATZ	PGSC0003DMG400007670	-1.7158	5.57e-21	3.75e-20	DOWN
Orphans	PGSC0003DMG400007749	-4.2764	7.99e-16	4.18e-15	DOWN
Trihelix	PGSC0003DMG400007806	-2.1254	6.66e-38	9.14e-37	DOWN
ARR-B	PGSC0003DMG400007823	-0.50369	0.00036158	0.00082366	DOWN
Orphans	PGSC0003DMG400007843	0.54393	0.00011702	0.00028042	UP
RWP-RK	PGSC0003DMG400007847	-0.87417	4.53e-11	1.81e-10	DOWN
HB	PGSC0003DMG400007887	-0.49284	0.0017504	0.0036922	DOWN
NAC	PGSC0003DMG400007953	-0.56687	0.00231	0.0048059	DOWN
HB	PGSC0003DMG400008057	-3.4056	3.51e-125	5.67e-123	DOWN
ARF	PGSC0003DMG400008065	-2.0102	2.64e-21	1.8e-20	DOWN
ARF	PGSC0003DMG400008081	-2.9714	6.63e-20	4.24e-19	DOWN
C2C2-GATA	PGSC0003DMG400008082	0.72661	1.24e-05	3.28e-05	UP
CCAAT	PGSC0003DMG400008148	-2.2278	0.00035179	0.0008024	DOWN
C2H2	PGSC0003DMG400008205	-0.83381	7.21e-08	2.3e-07	DOWN
HSF	PGSC0003DMG400008223	-2.8203	2.95e-95	2.31e-93	DOWN
E2F-DP	PGSC0003DMG400008373	0.84213	5.51e-09	1.92e-08	UP
G2-like	PGSC0003DMG400008401	-1.0741	0.0039966	0.0080349	DOWN
MYB	PGSC0003DMG400008454	-2.1422	8.99e-34	1.05e-32	DOWN
HMG	PGSC0003DMG400008501	-2.0011	3.98e-61	1.19e-59	DOWN
AUX/IAA	PGSC0003DMG400008586	-0.57643	0.00017997	0.00042319	DOWN
Coactivator p15	PGSC0003DMG400008674	-1.21	1.8e-13	8.31e-13	DOWN
EIL	PGSC0003DMG400008712	-4.1887	1.51e-234	3.31e-231	DOWN
SNF2	PGSC0003DMG400008774	-1.2273	2.58e-17	1.46e-16	DOWN
Orphans	PGSC0003DMG400008848	-1.1122	2.92e-10	1.11e-09	DOWN
GRAS	PGSC0003DMG400008904	0.87932	1.12e-07	3.53e-07	UP
C2C2-Dof	PGSC0003DMG400008914	-1.558	9.75e-16	5.07e-15	DOWN
CCAAT	PGSC0003DMG400008963	0.40249	0.0025784	0.005331	UP
CCAAT	PGSC0003DMG400008989	-1.4677	2.33e-28	2.18e-27	DOWN
SET	PGSC0003DMG400009044	-3.9827	9.12e-148	2.58e-145	DOWN
GNAT	PGSC0003DMG400009061	0.77421	1.9e-08	6.35e-08	UP
C2H2	PGSC0003DMG400009082	-1.3207	4.22e-27	3.76e-26	DOWN
PHD	PGSC0003DMG400009121	-0.95983	6.65e-12	2.79e-11	DOWN
Orphans	PGSC0003DMG400009122	-1.22	6.05e-06	1.64e-05	DOWN
mTERF	PGSC0003DMG400009194	0.60891	2.87e-05	7.33e-05	UP
mTERF	PGSC0003DMG400009215	0.62629	5.05e-05	0.00012562	UP
TCP	PGSC0003DMG400009276	-1.6303	6.73e-26	5.68e-25	DOWN
C2C2-GATA	PGSC0003DMG400009353	-1.416	6.35e-26	5.37e-25	DOWN
bZIP	PGSC0003DMG400009449	-0.51227	0.00011723	0.00028089	DOWN
MYB	PGSC0003DMG400009658	-1.3836	4.62e-07	1.38e-06	DOWN
ABI3VP1	PGSC0003DMG400009773	-1.4323	9.39e-26	7.86e-25	DOWN
C2H2	PGSC0003DMG400009859	-1.4797	0.0050949	0.010116	DOWN
SWI/SNF-SWI3	PGSC0003DMG400009998	0.9101	3.97e-08	1.29e-07	UP
bZIP	PGSC0003DMG400010008	-2.4577	2.99e-89	1.97e-87	DOWN
Trihelix	PGSC0003DMG400010197	-2.1311	4.65e-20	3e-19	DOWN
SNF2	PGSC0003DMG400010292	0.85777	3.54e-12	1.51e-11	UP
C2H2	PGSC0003DMG400010478	-1.0416	2.56e-10	9.78e-10	DOWN
GeBP	PGSC0003DMG400010582	-1.9118	0.00011153	0.00026797	DOWN
LIM	PGSC0003DMG400010609	-2.8528	7.61e-65	2.53e-63	DOWN
C2C2-GATA	PGSC0003DMG400010684	0.62553	0.00036451	0.00082988	UP
CCAAT	PGSC0003DMG400010697	-0.57036	8.38e-05	0.00020383	DOWN
Jumonji	PGSC0003DMG400010853	-2.0753	9.95e-28	9.1e-27	DOWN
Jumonji	PGSC0003DMG400010891	-1.7348	1.48e-41	2.33e-40	DOWN
SET	PGSC0003DMG400010972	0.97247	9.6e-08	3.03e-07	UP
GNAT	PGSC0003DMG400010997	-1.654	1.36e-19	8.6e-19	DOWN
PHD	PGSC0003DMG400011059	-0.79456	9.91e-10	3.64e-09	DOWN
WRKY	PGSC0003DMG400011186	-0.66417	0.0097266	0.018591	DOWN
Orphans	PGSC0003DMG400011378	-0.42077	0.0019917	0.004175	DOWN
SBP	PGSC0003DMG400011433	-3.8229	3.7e-20	2.4e-19	DOWN
G2-like	PGSC0003DMG400011435	-5.1932	2.43e-10	9.29e-10	DOWN
MYB	PGSC0003DMG400011500	-2.1689	1.95e-73	8.28e-72	DOWN
C2C2-GATA	PGSC0003DMG400011579	0.82769	2.71e-11	1.1e-10	UP
RB	PGSC0003DMG400011581	0.53282	0.00033371	0.0007626	UP
PHD	PGSC0003DMG400011588	0.7384	1.22e-05	3.23e-05	UP
IWS1	PGSC0003DMG400011644	0.35688	0.008952	0.017198	UP
GRAS	PGSC0003DMG400011742	-1.0562	2.07e-05	5.35e-05	DOWN
ARR-B	PGSC0003DMG400011980	-2.4936	1.83e-75	8.3e-74	DOWN
AP2-EREBP	PGSC0003DMG400012038	-4.0936	6.84e-145	1.86e-142	DOWN
AUX/IAA	PGSC0003DMG400012261	0.85317	0.0069545	0.013576	UP
Coactivator p15	PGSC0003DMG400012264	0.89486	7.32e-11	2.89e-10	UP
TRAF	PGSC0003DMG400012312	-2.4351	2.09e-86	1.27e-84	DOWN
SBP	PGSC0003DMG400012408	-1.4628	7.38e-18	4.29e-17	DOWN
GRAS	PGSC0003DMG400012683	-0.58725	6.13e-05	0.00015125	DOWN
C2H2	PGSC0003DMG400012684	-0.69291	0.00086542	0.0018906	DOWN
FHA	PGSC0003DMG400012752	-0.38026	0.0088624	0.017034	DOWN
LUG	PGSC0003DMG400012815	-0.97568	0.00068774	0.0015205	DOWN
TRAF	PGSC0003DMG400012880	0.71274	3.47e-08	1.14e-07	UP
bZIP	PGSC0003DMG400012962	-1.2593	0.0090357	0.017354	DOWN
GNAT	PGSC0003DMG400013015	-2.1981	2.41e-10	9.22e-10	DOWN
HMG	PGSC0003DMG400013103	-2.2465	0.0072487	0.01412	DOWN
ABI3VP1	PGSC0003DMG400013106	-5.4664	0.00068183	0.0015078	DOWN
RWP-RK	PGSC0003DMG400013140	-1.3762	8.97e-28	8.22e-27	DOWN
SWI/SNF-BAF60b	PGSC0003DMG400013280	-2.5508	3.85e-18	2.27e-17	DOWN
Trihelix	PGSC0003DMG400013300	-1.5589	4.51e-26	3.84e-25	DOWN
RWP-RK	PGSC0003DMG400013616	-0.59038	0.00070825	0.0015634	DOWN
RWP-RK	PGSC0003DMG400013619	0.86584	4.71e-06	1.29e-05	UP
Jumonji	PGSC0003DMG400013647	0.59896	2.11e-05	5.45e-05	UP
C3H	PGSC0003DMG400013655	-0.95517	1.36e-14	6.65e-14	DOWN
ARF	PGSC0003DMG400013686	-0.82346	1.93e-09	6.94e-09	DOWN
Trihelix	PGSC0003DMG400014176	-1.4041	0.0017178	0.0036275	DOWN
ARF	PGSC0003DMG400014179	-2.7603	1.8e-90	1.23e-88	DOWN
C3H	PGSC0003DMG400014305	0.80267	7.48e-11	2.95e-10	UP
HSF	PGSC0003DMG400014323	-3.5815	2.96e-76	1.37e-74	DOWN
GeBP	PGSC0003DMG400014527	-1.2673	1.05e-06	3.05e-06	DOWN
ABI3VP1	PGSC0003DMG400014537	-1.9778	6.46e-51	1.43e-49	DOWN
AP2-EREBP	PGSC0003DMG400014541	0.73036	5.93e-08	1.9e-07	UP
C3H	PGSC0003DMG400014565	-1.2516	1.83e-22	1.32e-21	DOWN
GRAS	PGSC0003DMG400014589	-1.19	0.0016355	0.0034627	DOWN
G2-like	PGSC0003DMG400014803	-1.2713	1.08e-07	3.38e-07	DOWN
bZIP	PGSC0003DMG400014858	0.54871	0.0065098	0.012762	UP
GRAS	PGSC0003DMG400014900	-2.0484	3.24e-38	4.5e-37	DOWN
mTERF	PGSC0003DMG400015070	0.94845	9.39e-09	3.21e-08	UP
bHLH	PGSC0003DMG400015482	-0.92149	0.00047842	0.0010763	DOWN
bZIP	PGSC0003DMG400015494	-4.0048	0.0096217	0.018405	DOWN
C2H2	PGSC0003DMG400015498	-0.87435	1.97e-10	7.57e-10	DOWN
TUB	PGSC0003DMG400015507	0.67032	0.0029505	0.0060483	UP
MYB	PGSC0003DMG400015536	-2.5168	2.07e-11	8.43e-11	DOWN
CCAAT	PGSC0003DMG400015565	0.70664	9.3e-06	2.48e-05	UP
ABI3VP1	PGSC0003DMG400015771	-0.51545	4.41e-05	0.00011038	DOWN
AP2-EREBP	PGSC0003DMG400015880	-1.5	1.44e-29	1.42e-28	DOWN
BSD	PGSC0003DMG400015962	0.68783	2.4e-05	6.17e-05	UP
MADS	PGSC0003DMG400016203	-1.3991	2.53e-05	6.5e-05	DOWN
C3H	PGSC0003DMG400016236	-2.011	2.96e-56	7.66e-55	DOWN
AUX/IAA	PGSC0003DMG400016317	-3.4335	3.03e-30	3.06e-29	DOWN
TCP	PGSC0003DMG400016363	-2.2748	2.35e-69	8.99e-68	DOWN
C3H	PGSC0003DMG400016400	0.52995	3.23e-05	8.19e-05	UP
Jumonji	PGSC0003DMG400016435	-0.59691	5.5e-06	1.5e-05	DOWN
bHLH	PGSC0003DMG400016608	-1.294	3.23e-13	1.47e-12	DOWN
EIL	PGSC0003DMG400016747	-7.2353	3.45e-15	1.75e-14	DOWN
IWS1	PGSC0003DMG400016781	-1.2829	5.16e-29	4.96e-28	DOWN
AP2-EREBP	PGSC0003DMG400016812	-1.2357	0.00034262	0.00078247	DOWN
bZIP	PGSC0003DMG400016906	-2.1631	4.32e-16	2.29e-15	DOWN
PHD	PGSC0003DMG400016917	-1.3629	4.55e-11	1.82e-10	DOWN
bZIP	PGSC0003DMG400016951	0.95508	8.76e-09	3e-08	UP
NAC	PGSC0003DMG400016962	0.51403	9.98e-05	0.00024083	UP
Orphans	PGSC0003DMG400017148	-4.3303	1.1e-07	3.46e-07	DOWN
SET	PGSC0003DMG400017150	-2.8904	5.5e-09	1.92e-08	DOWN
SET	PGSC0003DMG400017407	-2.5295	5.48e-66	1.9e-64	DOWN
SET	PGSC0003DMG400017559	-1.159	1.15e-10	4.5e-10	DOWN
LUG	PGSC0003DMG400017653	0.40815	0.00065569	0.0014528	UP
FHA	PGSC0003DMG400017739	-1.1639	6.25e-14	2.95e-13	DOWN
MADS	PGSC0003DMG400017760	-0.7683	1.92e-06	5.45e-06	DOWN
HSF	PGSC0003DMG400017846	0.43863	0.0085798	0.016535	UP
SET	PGSC0003DMG400017957	-4.2843	2.4e-219	2.64e-216	DOWN
HMG	PGSC0003DMG400018099	-1.0728	2.82e-17	1.59e-16	DOWN
Jumonji	PGSC0003DMG400018168	-1.3539	3.61e-15	1.82e-14	DOWN
bHLH	PGSC0003DMG400018280	-2.1486	1.29e-51	2.91e-50	DOWN
bHLH	PGSC0003DMG400018332	-1.2884	2.72e-13	1.24e-12	DOWN
C2C2-Dof	PGSC0003DMG400018408	-3.6669	4.73e-26	4.03e-25	DOWN
bZIP	PGSC0003DMG400018469	0.59829	1.94e-05	5.05e-05	UP
G2-like	PGSC0003DMG400018472	-1.5616	0.00035914	0.00081858	DOWN
SWI/SNF-BAF60b	PGSC0003DMG400018478	0.56013	0.00021553	0.00050238	UP
HMG	PGSC0003DMG400018685	-0.83653	9.61e-13	4.25e-12	DOWN
MYB	PGSC0003DMG400018702	-2.1422	8e-37	1.05e-35	DOWN
C2C2-Dof	PGSC0003DMG400018886	-1.4526	7.82e-10	2.89e-09	DOWN
bHLH	PGSC0003DMG400018950	-2.7259	6.18e-12	2.6e-11	DOWN
Orphans	PGSC0003DMG400019025	-1.2114	2.85e-05	7.27e-05	DOWN
HB	PGSC0003DMG400019142	-1.0791	6.88e-12	2.89e-11	DOWN
SWI/SNF-SWI3	PGSC0003DMG400019290	0.82961	0.00028592	0.00065824	UP
NAC	PGSC0003DMG400019293	-2.504	0.00028485	0.00065595	DOWN
C2H2	PGSC0003DMG400019342	-3.4576	0.00023497	0.00054555	DOWN
HSF	PGSC0003DMG400019344	-3.6869	1.34e-30	1.37e-29	DOWN
C2C2-Dof	PGSC0003DMG400019528	-2.7588	3.03e-05	7.71e-05	DOWN
NAC	PGSC0003DMG400019615	-1.7329	1.74e-18	1.04e-17	DOWN
HB	PGSC0003DMG400019635	-1.5391	1.09e-36	1.42e-35	DOWN
MADS	PGSC0003DMG400019742	-1.7515	5.39e-42	8.62e-41	DOWN
MYB	PGSC0003DMG400020071	0.69743	8.3e-05	0.00020202	UP
LUG	PGSC0003DMG400020093	-0.68167	7.65e-09	2.63e-08	DOWN
FHA	PGSC0003DMG400020100	-0.717	2.04e-07	6.26e-07	DOWN
OFP	PGSC0003DMG400020414	-4.3258	0.00018053	0.00042432	DOWN
Trihelix	PGSC0003DMG400020421	0.76981	0.0042075	0.0084421	UP
G2-like	PGSC0003DMG400020455	-3.6019	0.00049846	0.0011187	DOWN
AP2-EREBP	PGSC0003DMG400020625	-0.90839	6.16e-15	3.08e-14	DOWN
C3H	PGSC0003DMG400020705	-0.82227	1.13e-09	4.13e-09	DOWN
ABI3VP1	PGSC0003DMG400020711	0.48644	2.68e-05	6.86e-05	UP
HB	PGSC0003DMG400020785	-1.3103	9.43e-16	4.92e-15	DOWN
bHLH	PGSC0003DMG400020807	-3.3196	7.76e-48	1.54e-46	DOWN
Alfin-like	PGSC0003DMG400020951	-1.2801	2.13e-05	5.51e-05	DOWN
PHD	PGSC0003DMG400021118	-2.221	2.55e-50	5.52e-49	DOWN
Jumonji	PGSC0003DMG400021194	0.91816	0.0014955	0.0031813	UP
HB	PGSC0003DMG400021323	0.5111	1.28e-05	3.38e-05	UP
CCAAT	PGSC0003DMG400021365	-1.4769	9.85e-17	5.4e-16	DOWN
EIL	PGSC0003DMG400021381	0.92702	5.76e-06	1.57e-05	UP
HB	PGSC0003DMG400021423	-1.9291	5.5e-18	3.21e-17	DOWN
BSD	PGSC0003DMG400021436	-1.2102	3.54e-16	1.89e-15	DOWN
MYB	PGSC0003DMG400021459	-1.2405	7.57e-20	4.84e-19	DOWN
ARF	PGSC0003DMG400021560	0.48288	0.0013408	0.0028667	UP
ARID	PGSC0003DMG400021657	0.57619	0.0023605	0.0049029	UP
GRAS	PGSC0003DMG400021802	0.83528	1.4e-07	4.35e-07	UP
RWP-RK	PGSC0003DMG400022031	0.67691	0.0037568	0.0075864	UP
bHLH	PGSC0003DMG400022058	-0.97003	9.2e-13	4.07e-12	DOWN
PHD	PGSC0003DMG400022079	0.62671	0.0033757	0.0068603	UP
WRKY	PGSC0003DMG400022143	-1.2283	2.53e-24	1.98e-23	DOWN
CCAAT	PGSC0003DMG400022172	0.68904	0.008905	0.017113	UP
C3H	PGSC0003DMG400022185	-1.5206	1.25e-10	4.89e-10	DOWN
WRKY	PGSC0003DMG400022290	-2.0618	2.39e-38	3.35e-37	DOWN
SWI/SNF-BAF60b	PGSC0003DMG400022302	-0.9488	6.05e-07	1.79e-06	DOWN
Orphans	PGSC0003DMG400022345	-2.2252	3.5e-05	8.86e-05	DOWN
MYB	PGSC0003DMG400022422	-1.4999	1.19e-05	3.16e-05	DOWN
Jumonji	PGSC0003DMG400022424	-0.44548	0.00025241	0.00058411	DOWN
GeBP	PGSC0003DMG400022471	-0.44212	0.00087543	0.0019118	DOWN
C3H	PGSC0003DMG400022651	0.3381	0.005481	0.010838	UP
SNF2	PGSC0003DMG400022675	-1.4986	1.09e-37	1.48e-36	DOWN
MYB	PGSC0003DMG400022689	-0.64962	0.001504	0.003198	DOWN
AP2-EREBP	PGSC0003DMG400022695	-1.0666	3.74e-16	2e-15	DOWN
bZIP	PGSC0003DMG400022706	-1.4578	2.57e-20	1.68e-19	DOWN
GRAS	PGSC0003DMG400022709	-1.0482	0.0060106	0.011824	DOWN
HB	PGSC0003DMG400022736	-0.9243	1.47e-13	6.84e-13	DOWN
TCP	PGSC0003DMG400022738	-1.3672	0.00013079	0.00031197	DOWN
SBP	PGSC0003DMG400022824	-2.1365	0.0047298	0.0094213	DOWN
bZIP	PGSC0003DMG400022931	-1.0266	7.27e-05	0.00017803	DOWN
C2C2-GATA	PGSC0003DMG400023341	-1.2796	8.01e-06	2.15e-05	DOWN
NAC	PGSC0003DMG400023447	-1.4601	8.87e-10	3.27e-09	DOWN
G2-like	PGSC0003DMG400023467	-1.0597	2.44e-08	8.08e-08	DOWN
MYB	PGSC0003DMG400023495	-2.9237	3.82e-34	4.54e-33	DOWN
ARR-B	PGSC0003DMG400023534	-0.85779	9.38e-12	3.91e-11	DOWN
AP2-EREBP	PGSC0003DMG400023619	-2.0895	0.0021443	0.0044778	DOWN
C3H	PGSC0003DMG400023719	0.7213	1.44e-05	3.78e-05	UP
C2C2-GATA	PGSC0003DMG400023781	-2.5301	4.39e-05	0.00010983	DOWN
bHLH	PGSC0003DMG400023852	0.65151	7.65e-05	0.00018683	UP
SNF2	PGSC0003DMG400023950	-2.3535	5.64e-83	3.09e-81	DOWN
C3H	PGSC0003DMG400024054	0.81418	1.84e-07	5.67e-07	UP
Trihelix	PGSC0003DMG400024107	-0.68157	2.58e-05	6.61e-05	DOWN
HB	PGSC0003DMG400024157	-1.9665	5.66e-19	3.48e-18	DOWN
IWS1	PGSC0003DMG400024484	0.42511	0.00036383	0.00082846	UP
MYB	PGSC0003DMG400024572	-3.8843	2.32e-102	2.15e-100	DOWN
C2H2	PGSC0003DMG400024700	0.87979	4.31e-05	0.00010801	UP
PHD	PGSC0003DMG400024731	-0.60871	5.01e-06	1.37e-05	DOWN
C3H	PGSC0003DMG400024801	-0.88824	9.78e-15	4.83e-14	DOWN
SWI/SNF-BAF60b	PGSC0003DMG400024881	-1.3884	3.69e-07	1.11e-06	DOWN
TCP	PGSC0003DMG400024928	-2.8783	7.32e-115	9.18e-113	DOWN
LOB	PGSC0003DMG400024936	-0.73262	0.0040273	0.0080937	DOWN
MYB	PGSC0003DMG400024983	-1.1319	3e-17	1.69e-16	DOWN
C2C2-Dof	PGSC0003DMG400025129	-1.7499	8.19e-28	7.52e-27	DOWN
TAZ	PGSC0003DMG400025221	0.66456	4.26e-05	0.00010684	UP
C3H	PGSC0003DMG400025459	-3.0939	4.9e-29	4.71e-28	DOWN
Sigma70-like	PGSC0003DMG400025465	-1.4351	4.5e-19	2.78e-18	DOWN
MYB	PGSC0003DMG400025612	-2.5056	5.5e-16	2.91e-15	DOWN
MYB	PGSC0003DMG400025632	-2.1387	2.38e-05	6.11e-05	DOWN
ABI3VP1	PGSC0003DMG400025791	0.74695	8.82e-07	2.57e-06	UP
SWI/SNF-BAF60b	PGSC0003DMG400025800	0.61014	4.68e-05	0.00011686	UP
G2-like	PGSC0003DMG400025801	-1.9793	5.4e-44	9.48e-43	DOWN
GRAS	PGSC0003DMG400025973	0.38275	0.0080734	0.015627	UP
HB	PGSC0003DMG400025984	-2.6475	8.04e-11	3.17e-10	DOWN
GNAT	PGSC0003DMG400026070	-0.89172	4.72e-08	1.53e-07	DOWN
Tify	PGSC0003DMG400026089	-0.8151	2.6e-07	7.91e-07	DOWN
GeBP	PGSC0003DMG400026195	-0.82543	1.95e-09	7.03e-09	DOWN
C2C2-GATA	PGSC0003DMG400026248	-1.8021	3.83e-41	5.96e-40	DOWN
HB	PGSC0003DMG400026264	-3.4934	7.83e-53	1.83e-51	DOWN
C2C2-CO-like	PGSC0003DMG400026311	-0.8931	0.0012429	0.0026673	DOWN
ABI3VP1	PGSC0003DMG400026314	-1.5551	1.52e-07	4.7e-07	DOWN
MYB	PGSC0003DMG400026442	-1.7744	4.56e-08	1.48e-07	DOWN
HB	PGSC0003DMG400026460	-2.1112	8.25e-60	2.39e-58	DOWN
C3H	PGSC0003DMG400026471	-0.74598	0.00021844	0.00050873	DOWN
C3H	PGSC0003DMG400026524	-2.0988	2.93e-38	4.1e-37	DOWN
C2C2-GATA	PGSC0003DMG400026578	0.39374	0.0038607	0.0077813	UP
SET	PGSC0003DMG400026579	-0.38661	0.0057017	0.011246	DOWN
GRAS	PGSC0003DMG400026643	-1.9832	2.07e-06	5.84e-06	DOWN
MED6	PGSC0003DMG400026839	-0.56055	0.0024297	0.0050404	DOWN
BBR/BPC	PGSC0003DMG400026958	0.82223	4.08e-06	1.12e-05	UP
C2H2	PGSC0003DMG400026959	-1.9392	1.96e-09	7.04e-09	DOWN
IWS1	PGSC0003DMG400027098	-0.70102	1.28e-09	4.66e-09	DOWN
Orphans	PGSC0003DMG400027192	-3.6549	6.63e-08	2.12e-07	DOWN
G2-like	PGSC0003DMG400027229	-0.49834	0.00032892	0.0007522	DOWN
ABI3VP1	PGSC0003DMG400027236	-1.0169	1.68e-09	6.07e-09	DOWN
Orphans	PGSC0003DMG400027274	-0.68602	0.0055562	0.010976	DOWN
CCAAT	PGSC0003DMG400027390	-0.74419	3.41e-05	8.64e-05	DOWN
TRAF	PGSC0003DMG400027397	0.68474	4.01e-06	1.11e-05	UP
mTERF	PGSC0003DMG400027540	0.87314	0.0041939	0.0084167	UP
bZIP	PGSC0003DMG400027562	-2.3087	3.59e-21	2.44e-20	DOWN
Orphans	PGSC0003DMG400027651	-2.4571	8.42e-63	2.66e-61	DOWN
LOB	PGSC0003DMG400027718	-2.0056	0.00057555	0.0012827	DOWN
C3H	PGSC0003DMG400027902	-1.0145	3.15e-18	1.87e-17	DOWN
AP2-EREBP	PGSC0003DMG400027904	-0.97084	0.0046205	0.0092203	DOWN
bHLH	PGSC0003DMG400027959	-1.0262	3.59e-06	9.94e-06	DOWN
MYB	PGSC0003DMG400028098	-7.719	1.09e-09	4e-09	DOWN
G2-like	PGSC0003DMG400028100	-1.6422	0.00077739	0.0017081	DOWN
CCAAT	PGSC0003DMG400028144	-0.96372	3.22e-08	1.06e-07	DOWN
G2-like	PGSC0003DMG400028164	-1.7291	0.0014283	0.0030448	DOWN
PHD	PGSC0003DMG400028181	-0.41457	0.0029996	0.0061396	DOWN
IWS1	PGSC0003DMG400028192	0.75312	1.04e-08	3.54e-08	UP
WRKY	PGSC0003DMG400028381	0.70225	0.00012875	0.00030733	UP
WRKY	PGSC0003DMG400028469	0.88681	0.00014884	0.00035275	UP
NAC	PGSC0003DMG400028662	-0.95547	9.85e-11	3.87e-10	DOWN
Orphans	PGSC0003DMG400028818	-1.6251	2.65e-17	1.5e-16	DOWN
ARID	PGSC0003DMG400028852	0.78816	5.2e-11	2.07e-10	UP
AP2-EREBP	PGSC0003DMG400028853	-0.42284	0.0058352	0.011494	DOWN
NAC	PGSC0003DMG400028912	-2.9046	0.00028538	0.00065706	DOWN
bZIP	PGSC0003DMG400029118	-0.71393	3.32e-05	8.42e-05	DOWN
SET	PGSC0003DMG400029251	0.80091	1.22e-07	3.82e-07	UP
C2C2-CO-like	PGSC0003DMG400029365	-1.6092	3.69e-06	1.02e-05	DOWN
Orphans	PGSC0003DMG400029463	0.54574	0.0082525	0.015955	UP
TUB	PGSC0003DMG400029755	0.90145	5.65e-13	2.53e-12	UP
MBF1	PGSC0003DMG400029773	-2.4389	1.03e-32	1.16e-31	DOWN
WRKY	PGSC0003DMG400029815	-0.91638	7.13e-10	2.64e-09	DOWN
Orphans	PGSC0003DMG400029839	-1.7937	1.98e-05	5.14e-05	DOWN
GRAS	PGSC0003DMG400029921	-0.98252	8.62e-08	2.73e-07	DOWN
C3H	PGSC0003DMG400029993	-0.89913	1.34e-11	5.52e-11	DOWN
Trihelix	PGSC0003DMG400030023	-1.8666	3.48e-43	5.87e-42	DOWN
SET	PGSC0003DMG400030077	0.8493	3.91e-11	1.57e-10	UP
G2-like	PGSC0003DMG400030328	-0.55421	0.0011377	0.0024524	DOWN
G2-like	PGSC0003DMG400030389	-5.1523	4.99e-46	9.3e-45	DOWN
MYB	PGSC0003DMG400030397	-4.5584	1.42e-115	1.84e-113	DOWN
C2C2-Dof	PGSC0003DMG400030406	-1.4121	8.89e-07	2.59e-06	DOWN
GRAS	PGSC0003DMG400030468	-2.9607	7.19e-28	6.62e-27	DOWN
HB	PGSC0003DMG400030737	-0.7549	6.2e-11	2.45e-10	DOWN
C3H	PGSC0003DMG400030758	-1.4673	9.46e-08	2.99e-07	DOWN
SNF2	PGSC0003DMG400030952	-1.5456	2.38e-29	2.32e-28	DOWN
PHD	PGSC0003DMG400030955	-1.2097	1.04e-19	6.56e-19	DOWN
HB	PGSC0003DMG400030961	-0.72554	0.00099162	0.0021511	DOWN
CCAAT	PGSC0003DMG400030986	-3.2788	0.00060349	0.0013411	DOWN
ABI3VP1	PGSC0003DMG400031024	-1.1823	1.13e-16	6.18e-16	DOWN
NAC	PGSC0003DMG400031072	0.78715	1.43e-11	5.89e-11	UP
HB	PGSC0003DMG400031247	0.48817	0.00086086	0.0018821	UP
G2-like	PGSC0003DMG400031299	-2.6719	4.73e-10	1.77e-09	DOWN
SET	PGSC0003DMG400031307	-1.4782	1.83e-13	8.43e-13	DOWN
bHLH	PGSC0003DMG400031314	-2.2982	3.63e-25	2.96e-24	DOWN
mTERF	PGSC0003DMG400031337	-3.6156	2.98e-07	9.04e-07	DOWN
TAZ	PGSC0003DMG400031372	-1.217	4.75e-08	1.54e-07	DOWN
C3H	PGSC0003DMG400031374	-0.34557	0.0042803	0.0085798	DOWN
Trihelix	PGSC0003DMG400031382	-0.75832	1.53e-09	5.54e-09	DOWN
ABI3VP1	PGSC0003DMG400031769	-0.51631	1.97e-05	5.1e-05	DOWN
ARF	PGSC0003DMG400031888	-2.3596	3.3e-05	8.38e-05	DOWN
CPP	PGSC0003DMG400032257	0.98592	1.81e-13	8.36e-13	UP
OFP	PGSC0003DMG400032276	-1.8791	2.35e-07	7.2e-07	DOWN
CCAAT	PGSC0003DMG400032552	-0.99629	1.45e-10	5.63e-10	DOWN
C3H	PGSC0003DMG400032829	-1.1302	3.17e-13	1.44e-12	DOWN
MYB	PGSC0003DMG400033030	-1.1325	2.31e-11	9.39e-11	DOWN
C2C2-Dof	PGSC0003DMG400033046	-4.2462	1.14e-124	1.79e-122	DOWN
MADS	PGSC0003DMG400033570	-1.2733	9.86e-14	4.62e-13	DOWN
C2C2-GATA	PGSC0003DMG400033576	0.79535	1.03e-07	3.25e-07	UP
HRT	PGSC0003DMG400033614	-0.94809	4.13e-11	1.65e-10	DOWN
GNAT	PGSC0003DMG400033889	-0.89651	4.28e-05	0.00010723	DOWN
SET	PGSC0003DMG400034096	0.68786	2.93e-07	8.88e-07	UP
CCAAT	PGSC0003DMG400034306	-0.93916	0.0002298	0.00053395	DOWN
Orphans	PGSC0003DMG400034307	-1.213	1.97e-20	1.29e-19	DOWN
SBP	PGSC0003DMG400034310	-0.4626	0.0019216	0.0040342	DOWN
TIG	PGSC0003DMG400034313	-0.38188	0.0047561	0.0094684	DOWN
C2C2-Dof	PGSC0003DMG400037029	-3.3532	1.75e-06	4.99e-06	DOWN
Trihelix	PGSC0003DMG400037972	0.55076	0.00015323	0.00036279	UP
bZIP	PGSC0003DMG400037980	-1.1982	0.0098285	0.01877	DOWN
TCP	PGSC0003DMG400040232	-1.4608	3.58e-26	3.06e-25	DOWN
Rcd1-like	PGSC0003DMG400041536	-2.3234	0.0098952	0.018885	DOWN
C3H	PGSC0003DMG400042570	-2.1623	1.1e-08	3.74e-08	DOWN
C2C2-GATA	PGSC0003DMG400044001	-2.061	0.00011884	0.00028467	DOWN
CCAAT	PGSC0003DMG400044580	-0.90555	0.0014829	0.0031553	DOWN
SWI/SNF-SWI3	PGSC0003DMG400044864	0.62176	0.00014008	0.00033303	UP
GeBP	PGSC0003DMG400046446	-2.0032	1.12e-23	8.57e-23	DOWN
SNF2	PGSC0003DMG401000051	-0.62236	0.00069043	0.0015261	DOWN
MED6	PGSC0003DMG401002516	-0.5626	1.86e-05	4.85e-05	DOWN
HSF	PGSC0003DMG401002683	-2.6892	4.51e-86	2.72e-84	DOWN
E2F-DP	PGSC0003DMG401005482	-1.9081	1.14e-20	7.58e-20	DOWN
WRKY	PGSC0003DMG401005575	-1.7579	8.94e-41	1.37e-39	DOWN
RWP-RK	PGSC0003DMG401005796	-1.3274	1.62e-24	1.28e-23	DOWN
SBP	PGSC0003DMG401006284	-1.544	3.78e-37	5.04e-36	DOWN
HB	PGSC0003DMG401008054	-2.4652	1.07e-70	4.3e-69	DOWN
GRAS	PGSC0003DMG401009045	-2.4674	0.0075986	0.014762	DOWN
ABI3VP1	PGSC0003DMG401009541	-1.8623	2.28e-19	1.43e-18	DOWN
Orphans	PGSC0003DMG401010056	-2.9191	1.02e-34	1.24e-33	DOWN
MYB	PGSC0003DMG401010883	-4.9492	1.25e-26	1.09e-25	DOWN
SWI/SNF-BAF60b	PGSC0003DMG401012010	-0.69804	1.13e-07	3.53e-07	DOWN
RWP-RK	PGSC0003DMG401012256	0.64372	0.0009029	0.0019689	UP
PHD	PGSC0003DMG401012812	0.68351	6.65e-06	1.8e-05	UP
ABI3VP1	PGSC0003DMG401015175	-0.77267	3.46e-07	1.04e-06	DOWN
GNAT	PGSC0003DMG401015202	-1.3682	2.53e-31	2.69e-30	DOWN
MADS	PGSC0003DMG401015205	-6.4407	2.28e-13	1.05e-12	DOWN
bHLH	PGSC0003DMG401015926	-2.4972	1.03e-43	1.78e-42	DOWN
PHD	PGSC0003DMG401017043	-0.87749	2.23e-07	6.83e-07	DOWN
zf-HD	PGSC0003DMG401017193	-1.0722	2.8e-10	1.07e-09	DOWN
ARF	PGSC0003DMG401018664	-0.82588	2.36e-10	9.05e-10	DOWN
MADS	PGSC0003DMG401018787	-1.6879	7.68e-06	2.07e-05	DOWN
ARID	PGSC0003DMG401018896	-1.9014	3.78e-06	1.04e-05	DOWN
HSF	PGSC0003DMG401019343	-5.4569	7.53e-127	1.3e-124	DOWN
TRAF	PGSC0003DMG401020126	-0.62321	1.92e-06	5.44e-06	DOWN
CCAAT	PGSC0003DMG401021124	-2.0169	1.07e-28	1.01e-27	DOWN
mTERF	PGSC0003DMG401021149	0.81838	3.64e-05	9.19e-05	UP
MADS	PGSC0003DMG401024252	-2.5631	1.15e-12	5.07e-12	DOWN
CCAAT	PGSC0003DMG401024603	-2.1694	1.06e-05	2.81e-05	DOWN
MYB	PGSC0003DMG401025742	-0.70611	3.4e-05	8.62e-05	DOWN
FAR1	PGSC0003DMG401027016	0.77038	0.0036561	0.0073982	UP
bHLH	PGSC0003DMG401028788	-3.2642	1.85e-97	1.53e-95	DOWN
SBP	PGSC0003DMG401029709	-3.8628	2.44e-23	1.83e-22	DOWN
CCAAT	PGSC0003DMG401030137	-0.48983	8.31e-05	0.00020215	DOWN
GNAT	PGSC0003DMG401031287	-1.5169	2.16e-19	1.35e-18	DOWN
RWP-RK	PGSC0003DMG401032501	-1.4233	3.45e-14	1.65e-13	DOWN
ABI3VP1	PGSC0003DMG402009541	-2.3172	2.75e-30	2.78e-29	DOWN
C2C2-CO-like	PGSC0003DMG402010056	-2.0002	3.16e-32	3.5e-31	DOWN
AP2-EREBP	PGSC0003DMG402013892	-2.3648	9.03e-20	5.74e-19	DOWN
CCAAT	PGSC0003DMG402015259	-0.96436	2.71e-11	1.1e-10	DOWN
MYB	PGSC0003DMG402017733	-0.81379	2.99e-09	1.06e-08	DOWN
PHD	PGSC0003DMG402018008	-1.3514	0.0017033	0.0035986	DOWN
HMG	PGSC0003DMG402018896	-1.8712	1.58e-27	1.43e-26	DOWN
HSF	PGSC0003DMG402019343	-4.167	2.44e-83	1.35e-81	DOWN
AUX/IAA	PGSC0003DMG402019457	-1.0371	2.22e-10	8.53e-10	DOWN
TRAF	PGSC0003DMG402020126	-1.8754	1.06e-06	3.07e-06	DOWN
CCAAT	PGSC0003DMG402021124	-2.3646	0.0027395	0.0056437	DOWN
PHD	PGSC0003DMG402022202	-0.50146	0.0019256	0.0040417	DOWN
Jumonji	PGSC0003DMG402022350	0.68021	0.0062296	0.012235	UP
bZIP	PGSC0003DMG402023696	0.49519	6.73e-05	0.00016537	UP
C3H	PGSC0003DMG402025318	-0.94405	2.5e-09	8.93e-09	DOWN
NAC	PGSC0003DMG402027023	-0.68146	1.34e-06	3.85e-06	DOWN
SBP	PGSC0003DMG402029709	-3.9562	2.33e-06	6.55e-06	DOWN
MYB	PGSC0003DMG402030895	-1.1487	6.37e-10	2.36e-09	DOWN
C2H2	PGSC0003DMG402031064	-2.1514	3.58e-10	1.36e-09	DOWN
WRKY	PGSC0003DMG402033880	-0.88922	2.45e-05	6.29e-05	DOWN
SWI/SNF-BAF60b	PGSC0003DMG403015244	0.63174	3.54e-05	8.95e-05	UP
C2C2-GATA	PGSC0003DMG403025785	-2.8084	2.83e-77	1.35e-75	DOWN

## Sheet: 12 h
Table S7 The transcriptional factors in response to cut-wounding at different time
Family	Gene_ID	log2FoldChange(X2_12h vs X2_0h_)	pval(X2_12h vs X2_0h)	padj(X2_12h vs X2_0h)	significant(X2_12h vs X2_0h)
SET	Novel00429	1.1806	2.17e-06	5.83e-06	UP
GNAT	Novel00849	1.3824	2.97e-16	1.46e-15	UP
DDT	Novel01129	1.3192	1.51e-20	9.19e-20	UP
AP2-EREBP	Novel01224	2.4435	0.00012118	0.00027718	UP
Alfin-like	Novel01390	1.0036	3.5e-09	1.15e-08	UP
MADS	Novel01421	3.0393	1.31e-34	1.44e-33	UP
SET	Novel01713	3.0473	4.69e-42	6.71e-41	UP
FAR1	Novel02027	1.7205	4.32e-25	3.22e-24	UP
Jumonji	Novel02291	1.1013	8.72e-16	4.19e-15	UP
SNF2	Novel02326	1.3302	6.79e-12	2.64e-11	UP
LOB	Novel02473	6.9177	1.19e-09	4.04e-09	UP
PHD	Novel02614	1.2863	2.31e-09	7.68e-09	UP
bHLH	Novel02679	1.5929	9.59e-20	5.61e-19	UP
FHA	Novel02920	1.686	4.66e-08	1.42e-07	UP
MYB	Novel03381	5.4628	1.42e-09	4.77e-09	UP
WRKY	PGSC0003DMG400000064	3.0192	0.00060425	0.0012878	UP
ARID	PGSC0003DMG400000178	3.5135	1.29e-26	1.03e-25	UP
HB	PGSC0003DMG400000248	1.967	1.01e-10	3.65e-10	UP
MYB	PGSC0003DMG400000340	4.8458	1.31e-15	6.23e-15	UP
AP2-EREBP	PGSC0003DMG400000365	2.6393	3.12e-09	1.03e-08	UP
mTERF	PGSC0003DMG400000587	2.0303	1.45e-24	1.06e-23	UP
bHLH	PGSC0003DMG400000711	2.0558	2.57e-06	6.84e-06	UP
AP2-EREBP	PGSC0003DMG400000811	2.1969	2.89e-05	7.01e-05	UP
G2-like	PGSC0003DMG400000922	4.9106	9.59e-52	1.86e-50	UP
Tify	PGSC0003DMG400001178	2.503	0.0016591	0.003359	UP
E2F-DP	PGSC0003DMG400001296	2.1465	4.81e-34	5.18e-33	UP
NAC	PGSC0003DMG400001338	2.6552	2.63e-09	8.69e-09	UP
Orphans	PGSC0003DMG400001399	1.905	2.62e-28	2.24e-27	UP
HB	PGSC0003DMG400001565	2.6008	2.22e-76	8.7e-75	UP
HMG	PGSC0003DMG400001567	1.9144	4.14e-51	7.86e-50	UP
CSD	PGSC0003DMG400001590	1.3766	1.82e-24	1.32e-23	UP
CSD	PGSC0003DMG400001591	1.0313	1.44e-17	7.61e-17	UP
bZIP	PGSC0003DMG400001659	1.3328	6.82e-24	4.83e-23	UP
SWI/SNF-BAF60b	PGSC0003DMG400001965	1.8256	6.34e-16	3.07e-15	UP
MYB	PGSC0003DMG400002013	2.7723	4.76e-18	2.58e-17	UP
AP2-EREBP	PGSC0003DMG400002272	2.9713	0.0017496	0.0035317	UP
C2C2-GATA	PGSC0003DMG400002337	1.0161	0.0034587	0.0067255	UP
AP2-EREBP	PGSC0003DMG400002350	3.2869	1.01e-19	5.92e-19	UP
Trihelix	PGSC0003DMG400002710	1.2235	1.75e-18	9.67e-18	UP
ABI3VP1	PGSC0003DMG400002784	2.1082	6.1e-26	4.73e-25	UP
Tify	PGSC0003DMG400002930	3.0812	2.71e-14	1.21e-13	UP
Orphans	PGSC0003DMG400003711	1.0094	2.57e-13	1.08e-12	UP
zf-HD	PGSC0003DMG400003736	1.3242	4.33e-07	1.23e-06	UP
HB	PGSC0003DMG400003751	2.4263	1.29e-45	2.08e-44	UP
E2F-DP	PGSC0003DMG400003778	2.9547	8.06e-38	1.01e-36	UP
MYB	PGSC0003DMG400003890	4.2663	2.39e-40	3.23e-39	UP
bHLH	PGSC0003DMG400004011	2.3392	0.00025654	0.00056847	UP
C2C2-Dof	PGSC0003DMG400004062	1.4189	6.21e-24	4.41e-23	UP
bHLH	PGSC0003DMG400004087	2.8717	2.17e-95	1.34e-93	UP
MYB	PGSC0003DMG400004371	8.6283	3.12e-58	7.33e-57	UP
Trihelix	PGSC0003DMG400004470	1.0925	1.06e-10	3.84e-10	UP
bHLH	PGSC0003DMG400004580	2.1446	0.00018569	0.00041695	UP
C2C2-GATA	PGSC0003DMG400004624	1.096	2.18e-06	5.84e-06	UP
Orphans	PGSC0003DMG400004643	2.7193	3.95e-13	1.65e-12	UP
GNAT	PGSC0003DMG400004653	1.1072	0.0020025	0.004014	UP
C2H2	PGSC0003DMG400004763	3.6265	0.0012494	0.0025713	UP
FHA	PGSC0003DMG400004768	1.4883	8.44e-05	0.00019584	UP
LOB	PGSC0003DMG400004845	1.6208	2.34e-05	5.72e-05	UP
AP2-EREBP	PGSC0003DMG400004921	3.2141	8.21e-08	2.46e-07	UP
bHLH	PGSC0003DMG400005101	6.5671	3.78e-91	2.11e-89	UP
bZIP	PGSC0003DMG400005476	1.7844	7.19e-09	2.32e-08	UP
MYB	PGSC0003DMG400005641	3.3954	1.07e-28	9.25e-28	UP
MYB	PGSC0003DMG400006176	2.6414	3.7e-39	4.85e-38	UP
HB	PGSC0003DMG400006311	1.7996	6.71e-16	3.24e-15	UP
bHLH	PGSC0003DMG400006394	5.0582	0.0022731	0.0045241	UP
C2H2	PGSC0003DMG400006417	1.2598	1.58e-08	4.96e-08	UP
TRAF	PGSC0003DMG400006428	1.0395	2.74e-08	8.47e-08	UP
CCAAT	PGSC0003DMG400006441	1.36	4.84e-24	3.45e-23	UP
HSF	PGSC0003DMG400006447	3.1711	0.00088115	0.0018455	UP
AP2-EREBP	PGSC0003DMG400006604	4.1285	4.11e-10	1.43e-09	UP
GNAT	PGSC0003DMG400006777	1.7653	1.71e-39	2.26e-38	UP
LOB	PGSC0003DMG400006914	2.0011	1.05e-05	2.66e-05	UP
bHLH	PGSC0003DMG400007010	1.1084	1.72e-12	6.93e-12	UP
PHD	PGSC0003DMG400007086	6.9889	3.45e-79	1.45e-77	UP
C2H2	PGSC0003DMG400007112	2.9084	1.79e-05	4.41e-05	UP
DDT	PGSC0003DMG400007126	1.8104	0.0007838	0.0016503	UP
bZIP	PGSC0003DMG400007208	1.436	3.82e-14	1.69e-13	UP
MYB	PGSC0003DMG400007304	5.1405	4.2e-16	2.06e-15	UP
mTERF	PGSC0003DMG400007323	1.0285	8.47e-09	2.71e-08	UP
LOB	PGSC0003DMG400007503	6.1482	2.19e-38	2.79e-37	UP
bHLH	PGSC0003DMG400007559	1.0217	8.37e-07	2.32e-06	UP
HB	PGSC0003DMG400007733	1.2624	0.0097424	0.017832	UP
WRKY	PGSC0003DMG400007788	3.9102	3.22e-24	2.32e-23	UP
DBP	PGSC0003DMG400007819	2.1528	9.39e-52	1.82e-50	UP
bHLH	PGSC0003DMG400007827	2.5237	4.24e-06	1.11e-05	UP
mTERF	PGSC0003DMG400007874	1.9343	2.94e-16	1.45e-15	UP
WRKY	PGSC0003DMG400007947	1.8305	1.53e-25	1.16e-24	UP
HSF	PGSC0003DMG400007962	2.0497	3.7e-06	9.74e-06	UP
C2C2-GATA	PGSC0003DMG400008082	1.0327	1.5e-10	5.37e-10	UP
C2H2	PGSC0003DMG400008110	1.0415	0.00047136	0.001015	UP
AP2-EREBP	PGSC0003DMG400008538	4.6508	1.35e-05	3.37e-05	UP
PLATZ	PGSC0003DMG400008598	4.3994	1.19e-29	1.07e-28	UP
Tify	PGSC0003DMG400008782	3.8588	1.15e-12	4.67e-12	UP
MYB	PGSC0003DMG400008834	3.5464	2.66e-23	1.84e-22	UP
ABI3VP1	PGSC0003DMG400008936	3.1531	1.15e-66	3.44e-65	UP
GNAT	PGSC0003DMG400008956	1.1137	3.16e-09	1.04e-08	UP
GNAT	PGSC0003DMG400008977	2.1065	9e-41	1.24e-39	UP
MYB	PGSC0003DMG400009033	3.3676	2.99e-66	8.85e-65	UP
WRKY	PGSC0003DMG400009051	2.0468	1.04e-22	6.96e-22	UP
AP2-EREBP	PGSC0003DMG400009142	1.07	2.8e-17	1.46e-16	UP
G2-like	PGSC0003DMG400009304	2.0358	6.67e-19	3.75e-18	UP
TCP	PGSC0003DMG400009406	1.8725	0.0052827	0.010033	UP
WRKY	PGSC0003DMG400009530	1.1845	1.35e-12	5.48e-12	UP
WRKY	PGSC0003DMG400009703	5.8197	1.8e-117	1.73e-115	UP
SET	PGSC0003DMG400009729	1.0149	2.83e-08	8.76e-08	UP
SWI/SNF-BAF60b	PGSC0003DMG400009782	4.0721	1.41e-89	7.62e-88	UP
PLATZ	PGSC0003DMG400009931	1.8082	0.0001686	0.00038025	UP
G2-like	PGSC0003DMG400010067	3.9343	4.66e-12	1.83e-11	UP
bHLH	PGSC0003DMG400010208	5.1984	2.1e-12	8.41e-12	UP
bHLH	PGSC0003DMG400010388	2.9443	1.77e-08	5.54e-08	UP
HB	PGSC0003DMG400010401	1.1617	4.76e-05	0.00011313	UP
AP2-EREBP	PGSC0003DMG400010724	2.9539	0.0067309	0.0126	UP
GNAT	PGSC0003DMG400010832	3.1908	0.0079451	0.014735	UP
WRKY	PGSC0003DMG400010987	5.7645	3.13e-10	1.1e-09	UP
bHLH	PGSC0003DMG400011133	1.8668	4.64e-15	2.16e-14	UP
MYB	PGSC0003DMG400011243	5.7339	4.13e-05	9.87e-05	UP
MYB	PGSC0003DMG400011250	3.4384	2.09e-07	6.06e-07	UP
TUB	PGSC0003DMG400011352	1.1869	7.31e-21	4.51e-20	UP
C2H2	PGSC0003DMG400011365	1.9195	1.68e-10	6.01e-10	UP
LIM	PGSC0003DMG400011558	1.9768	1.13e-11	4.34e-11	UP
RB	PGSC0003DMG400011581	1.1735	3.48e-16	1.71e-15	UP
WRKY	PGSC0003DMG400011633	3.0282	7.01e-05	0.00016399	UP
G2-like	PGSC0003DMG400011688	2.0453	1.47e-05	3.65e-05	UP
HB	PGSC0003DMG400011810	1.6962	2.21e-20	1.33e-19	UP
C2H2	PGSC0003DMG400011873	1.3317	0.0014439	0.0029478	UP
NAC	PGSC0003DMG400011891	2.5228	7.08e-18	3.81e-17	UP
C2C2-GATA	PGSC0003DMG400012014	2.1446	2.05e-06	5.51e-06	UP
GRAS	PGSC0003DMG400012071	1.2333	0.00023778	0.00052875	UP
MYB	PGSC0003DMG400012126	2.817	3.33e-05	8.03e-05	UP
AP2-EREBP	PGSC0003DMG400012154	1.7507	7.04e-11	2.58e-10	UP
AUX/IAA	PGSC0003DMG400012261	1.4152	6.68e-07	1.87e-06	UP
WRKY	PGSC0003DMG400012318	5.17	9.8e-15	4.47e-14	UP
TCP	PGSC0003DMG400012396	1.1216	0.0011061	0.002291	UP
NAC	PGSC0003DMG400012607	2.7034	3.12e-07	8.93e-07	UP
LOB	PGSC0003DMG400012629	1.1237	2.53e-06	6.76e-06	UP
zf-HD	PGSC0003DMG400013213	1.6122	2.05e-17	1.08e-16	UP
MYB	PGSC0003DMG400013215	2.0198	1.7e-25	1.28e-24	UP
NAC	PGSC0003DMG400013387	5.2358	0.0029943	0.0058693	UP
CCAAT	PGSC0003DMG400013436	6.0843	3.81e-89	2.03e-87	UP
SNF2	PGSC0003DMG400013449	6.8721	4.7e-63	1.25e-61	UP
AP2-EREBP	PGSC0003DMG400013744	1.3259	7.05e-13	2.91e-12	UP
AP2-EREBP	PGSC0003DMG400014157	4.5685	4.95e-13	2.06e-12	UP
FHA	PGSC0003DMG400014226	1.4121	3.25e-09	1.07e-08	UP
AP2-EREBP	PGSC0003DMG400014240	4.5801	2.37e-34	2.59e-33	UP
bHLH	PGSC0003DMG400014246	2.9854	7.85e-13	3.23e-12	UP
GNAT	PGSC0003DMG400014297	1.6748	0.00087917	0.0018419	UP
GNAT	PGSC0003DMG400014499	4.0704	0.0080147	0.014856	UP
AP2-EREBP	PGSC0003DMG400014594	2.8623	2.49e-13	1.05e-12	UP
AP2-EREBP	PGSC0003DMG400014598	4.3495	1.65e-16	8.24e-16	UP
RWP-RK	PGSC0003DMG400014662	1.9498	0.0049602	0.0094472	UP
GNAT	PGSC0003DMG400014771	3.3778	2.35e-25	1.77e-24	UP
GNAT	PGSC0003DMG400014772	4.5056	3.42e-85	1.66e-83	UP
GNAT	PGSC0003DMG400014774	4.3066	7.74e-20	4.55e-19	UP
GNAT	PGSC0003DMG400014778	3.3163	6.36e-12	2.48e-11	UP
Jumonji	PGSC0003DMG400014791	2.6921	6.54e-31	6.21e-30	UP
bZIP	PGSC0003DMG400014858	1.1398	7.32e-10	2.51e-09	UP
SNF2	PGSC0003DMG400014895	7.1535	3.54e-47	6.02e-46	UP
WRKY	PGSC0003DMG400015015	2.1438	1.03e-39	1.36e-38	UP
TAZ	PGSC0003DMG400015229	2.8179	4.69e-47	7.94e-46	UP
NAC	PGSC0003DMG400015342	2.7562	1.63e-28	1.4e-27	UP
SNF2	PGSC0003DMG400015477	5.0306	6.78e-146	1.13e-143	UP
C2H2	PGSC0003DMG400015557	3.0504	0.0023805	0.0047266	UP
CCAAT	PGSC0003DMG400015565	2.5413	9.49e-71	3.19e-69	UP
HB	PGSC0003DMG400015622	3.0422	1.03e-59	2.53e-58	UP
Tify	PGSC0003DMG400015667	3.681	9.64e-82	4.25e-80	UP
MYB	PGSC0003DMG400015668	4.522	2.83e-05	6.86e-05	UP
AP2-EREBP	PGSC0003DMG400016003	2.8124	1.05e-16	5.29e-16	UP
AP2-EREBP	PGSC0003DMG400016196	2.2987	2.89e-12	1.15e-11	UP
HSF	PGSC0003DMG400016270	1.1529	6.24e-09	2.02e-08	UP
MYB	PGSC0003DMG400016292	2.1811	1.31e-05	3.27e-05	UP
E2F-DP	PGSC0003DMG400016418	1.73	2.8e-28	2.39e-27	UP
WRKY	PGSC0003DMG400016441	4.5741	5.94e-125	6.48e-123	UP
WRKY	PGSC0003DMG400016769	1.4761	2.88e-10	1.01e-09	UP
HB	PGSC0003DMG400016790	1.836	4.31e-46	7.06e-45	UP
bZIP	PGSC0003DMG400016951	1.8254	1.54e-34	1.69e-33	UP
SET	PGSC0003DMG400017176	1.985	1.08e-27	9e-27	UP
AP2-EREBP	PGSC0003DMG400017231	2.3062	1.3e-08	4.13e-08	UP
WRKY	PGSC0003DMG400017349	4.6044	2.71e-86	1.34e-84	UP
NAC	PGSC0003DMG400017505	2.0542	0.00023842	0.00053008	UP
PBF-2-like	PGSC0003DMG400017627	2.1382	5.55e-25	4.12e-24	UP
MYB	PGSC0003DMG400018331	5.1191	1.15e-29	1.04e-28	UP
MYB	PGSC0003DMG400018427	3.0098	6.73e-05	0.0001577	UP
mTERF	PGSC0003DMG400018430	1.3395	5.38e-05	0.00012722	UP
mTERF	PGSC0003DMG400018453	1.9229	4.26e-06	1.12e-05	UP
Jumonji	PGSC0003DMG400018506	3.4363	1.28e-06	3.51e-06	UP
HB	PGSC0003DMG400018509	1.228	1.55e-12	6.26e-12	UP
SET	PGSC0003DMG400018520	5.9859	1.59e-31	1.55e-30	UP
MYB	PGSC0003DMG400018588	5.405	2.33e-19	1.34e-18	UP
NAC	PGSC0003DMG400019294	2.7822	4.17e-17	2.16e-16	UP
AUX/IAA	PGSC0003DMG400019333	2.9555	8.38e-44	1.27e-42	UP
Tify	PGSC0003DMG400019346	1.2129	4.64e-17	2.39e-16	UP
WRKY	PGSC0003DMG400019408	4.5961	8.15e-09	2.62e-08	UP
zf-HD	PGSC0003DMG400019534	2.1222	3.85e-09	1.26e-08	UP
MYB	PGSC0003DMG400019535	4.8198	6.28e-23	4.27e-22	UP
E2F-DP	PGSC0003DMG400019629	1.0046	1.3e-05	3.25e-05	UP
GNAT	PGSC0003DMG400019822	5.2021	2.95e-06	7.82e-06	UP
MYB	PGSC0003DMG400020071	1.3025	4.13e-13	1.72e-12	UP
Trihelix	PGSC0003DMG400020098	1.5162	1.4e-14	6.33e-14	UP
MYB	PGSC0003DMG400020338	1.6966	4.33e-11	1.61e-10	UP
bHLH	PGSC0003DMG400020427	1.9434	7.99e-08	2.4e-07	UP
WRKY	PGSC0003DMG400020432	1.1333	6.85e-06	1.76e-05	UP
Trihelix	PGSC0003DMG400020508	1.0849	2.67e-15	1.26e-14	UP
ABI3VP1	PGSC0003DMG400020648	2.0618	1.06e-11	4.06e-11	UP
C3H	PGSC0003DMG400020665	1.9461	3.72e-12	1.47e-11	UP
S1Fa-like	PGSC0003DMG400020934	1.9086	1.77e-10	6.32e-10	UP
LOB	PGSC0003DMG400021204	3.8014	0.00072504	0.0015327	UP
bZIP	PGSC0003DMG400021431	1.4067	0.002387	0.0047384	UP
C2H2	PGSC0003DMG400021508	1.6418	8.28e-08	2.48e-07	UP
LOB	PGSC0003DMG400021509	1.2819	0.0061092	0.011505	UP
bHLH	PGSC0003DMG400021717	1.7728	1.8e-42	2.62e-41	UP
G2-like	PGSC0003DMG400021857	3.4862	1.26e-38	1.61e-37	UP
WRKY	PGSC0003DMG400021895	2.355	6.19e-27	5.01e-26	UP
SBP	PGSC0003DMG400021902	3.2448	2.84e-08	8.79e-08	UP
WRKY	PGSC0003DMG400022063	4.5938	8.42e-27	6.78e-26	UP
TRAF	PGSC0003DMG400022260	2.4594	2.66e-71	9.07e-70	UP
MYB	PGSC0003DMG400022399	4.1268	8.09e-59	1.94e-57	UP
HSF	PGSC0003DMG400022405	2.5683	2.19e-43	3.3e-42	UP
bZIP	PGSC0003DMG400022589	2.9909	7.41e-06	1.9e-05	UP
CCAAT	PGSC0003DMG400022680	3.99	0.0054101	0.01026	UP
MADS	PGSC0003DMG400022748	1.6889	1.74e-12	7e-12	UP
AP2-EREBP	PGSC0003DMG400022759	3.4153	1.85e-10	6.6e-10	UP
VOZ	PGSC0003DMG400022817	1.4861	4.73e-13	1.96e-12	UP
AP2-EREBP	PGSC0003DMG400022823	1.6622	9.28e-35	1.03e-33	UP
Tify	PGSC0003DMG400022888	2.2292	1.16e-64	3.26e-63	UP
Orphans	PGSC0003DMG400022983	1.8861	6.02e-08	1.82e-07	UP
mTERF	PGSC0003DMG400023133	2.839	3.57e-42	5.13e-41	UP
CPP	PGSC0003DMG400023147	4.5003	3.81e-154	8.19e-152	UP
SWI/SNF-BAF60b	PGSC0003DMG400023191	4.7661	0.0021396	0.0042769	UP
CSD	PGSC0003DMG400023206	1.716	0.0073587	0.013703	UP
SBP	PGSC0003DMG400023260	1.9602	2.27e-22	1.5e-21	UP
AP2-EREBP	PGSC0003DMG400023295	4.0218	1.52e-12	6.15e-12	UP
MYB	PGSC0003DMG400023405	2.4797	7.54e-26	5.82e-25	UP
C2H2	PGSC0003DMG400023547	7.2207	2.06e-17	1.08e-16	UP
MYB	PGSC0003DMG400023570	4.6555	2.71e-10	9.53e-10	UP
AP2-EREBP	PGSC0003DMG400023593	3.1327	0.0095605	0.017522	UP
bZIP	PGSC0003DMG400023678	6.8065	0.0083294	0.015395	UP
C2H2	PGSC0003DMG400023684	1.0966	2.79e-06	7.42e-06	UP
C3H	PGSC0003DMG400023710	1.072	1.39e-15	6.62e-15	UP
C3H	PGSC0003DMG400024054	1.0002	9.54e-11	3.46e-10	UP
AUX/IAA	PGSC0003DMG400024320	1.289	4.29e-18	2.33e-17	UP
GRAS	PGSC0003DMG400024781	1.3997	8.4e-07	2.33e-06	UP
C2C2-GATA	PGSC0003DMG400024783	1.2826	0.0038033	0.0073568	UP
WRKY	PGSC0003DMG400024961	3.0224	3.12e-77	1.25e-75	UP
CCAAT	PGSC0003DMG400025012	2.1405	2.63e-38	3.33e-37	UP
MYB	PGSC0003DMG400025303	1.9621	4.32e-08	1.32e-07	UP
HMG	PGSC0003DMG400025304	9.7206	2.26e-165	5.96e-163	UP
LOB	PGSC0003DMG400025384	1.9495	6.05e-10	2.08e-09	UP
LOB	PGSC0003DMG400025400	5.3593	3.81e-94	2.31e-92	UP
C3H	PGSC0003DMG400025515	1.3724	5.28e-11	1.95e-10	UP
AP2-EREBP	PGSC0003DMG400025582	4.3922	0.00022266	0.00049663	UP
HB	PGSC0003DMG400025614	1.4383	9.89e-06	2.51e-05	UP
ABI3VP1	PGSC0003DMG400025792	2.2616	0.00060386	0.0012871	UP
SWI/SNF-BAF60b	PGSC0003DMG400025852	1.0582	5.96e-14	2.6e-13	UP
GRAS	PGSC0003DMG400025973	1.1622	1.43e-15	6.79e-15	UP
AP2-EREBP	PGSC0003DMG400025989	3.3871	1.54e-138	2.15e-136	UP
AP2-EREBP	PGSC0003DMG400026035	3.1833	1.04e-15	4.99e-15	UP
DBP	PGSC0003DMG400026085	1.363	1.46e-12	5.9e-12	UP
GNAT	PGSC0003DMG400026128	2.2816	1.33e-64	3.71e-63	UP
GeBP	PGSC0003DMG400026196	1.2759	4.42e-12	1.74e-11	UP
AP2-EREBP	PGSC0003DMG400026260	1.5206	0.0057391	0.010847	UP
AP2-EREBP	PGSC0003DMG400026261	3.0426	3.24e-05	7.81e-05	UP
GNAT	PGSC0003DMG400026301	4.699	7.8e-88	3.98e-86	UP
CCAAT	PGSC0003DMG400026357	1.7201	7.69e-24	5.42e-23	UP
AP2-EREBP	PGSC0003DMG400026461	2.2411	7.67e-21	4.73e-20	UP
G2-like	PGSC0003DMG400026587	1.0606	0.00065352	0.0013885	UP
SBP	PGSC0003DMG400026736	2.0591	5.78e-06	1.5e-05	UP
AP2-EREBP	PGSC0003DMG400026821	1.0449	1.54e-14	6.96e-14	UP
HB	PGSC0003DMG400027030	5.6335	0.00028386	0.00062549	UP
HSF	PGSC0003DMG400027036	1.0391	1.31e-09	4.44e-09	UP
MYB	PGSC0003DMG400027077	3.1205	2.11e-20	1.27e-19	UP
WRKY	PGSC0003DMG400027208	2.9487	0.0017887	0.0036074	UP
HSF	PGSC0003DMG400027283	3.7108	1.16e-23	8.09e-23	UP
LOB	PGSC0003DMG400027372	4.4631	1.45e-58	3.45e-57	UP
mTERF	PGSC0003DMG400027538	3.0534	1.14e-06	3.12e-06	UP
mTERF	PGSC0003DMG400027539	1.4279	1.38e-06	3.77e-06	UP
mTERF	PGSC0003DMG400027558	1.3451	5.08e-06	1.32e-05	UP
GNAT	PGSC0003DMG400027761	2.7975	1.57e-11	5.99e-11	UP
BES1	PGSC0003DMG400027820	1.8524	8.14e-22	5.23e-21	UP
BES1	PGSC0003DMG400027849	1.2413	5.85e-17	3e-16	UP
TRAF	PGSC0003DMG400027977	4.1209	0.0028656	0.0056362	UP
MYB	PGSC0003DMG400028119	5.2244	2.87e-128	3.38e-126	UP
Jumonji	PGSC0003DMG400028132	2.3533	1.35e-37	1.67e-36	UP
ABI3VP1	PGSC0003DMG400028159	4.2408	1.3e-20	7.91e-20	UP
WRKY	PGSC0003DMG400028469	1.4992	2.24e-12	8.99e-12	UP
AP2-EREBP	PGSC0003DMG400028500	4.3395	0.00091989	0.0019222	UP
WRKY	PGSC0003DMG400028633	7.2304	7.36e-15	3.38e-14	UP
PHD	PGSC0003DMG400028656	2.163	1.46e-18	8.1e-18	UP
Tify	PGSC0003DMG400028800	5.5161	1.68e-05	4.15e-05	UP
G2-like	PGSC0003DMG400028830	6.9533	9.67e-16	4.63e-15	UP
CCAAT	PGSC0003DMG400029110	3.8629	2.65e-06	7.06e-06	UP
Orphans	PGSC0003DMG400029237	3.7267	2.97e-66	8.81e-65	UP
mTERF	PGSC0003DMG400029310	2.2675	5.09e-06	1.32e-05	UP
WRKY	PGSC0003DMG400029371	1.8937	1.25e-16	6.29e-16	UP
PLATZ	PGSC0003DMG400029466	3.9605	1.79e-18	9.88e-18	UP
Trihelix	PGSC0003DMG400030246	1.7539	0.0024237	0.0048068	UP
C2H2	PGSC0003DMG400030311	3.9048	0.00018832	0.00042258	UP
AP2-EREBP	PGSC0003DMG400030472	1.0039	0.00021153	0.00047258	UP
C3H	PGSC0003DMG400030567	3.9594	0.00045608	0.00098322	UP
DBP	PGSC0003DMG400030694	2.6669	2.88e-96	1.83e-94	UP
MYB	PGSC0003DMG400031044	3.9409	0.0022077	0.0044067	UP
NAC	PGSC0003DMG400031071	1.6512	9.92e-39	1.28e-37	UP
Sigma70-like	PGSC0003DMG400031111	1.4779	7.69e-12	2.98e-11	UP
MYB	PGSC0003DMG400031317	1.0721	5.05e-06	1.32e-05	UP
mTERF	PGSC0003DMG400031415	1.0134	3.88e-05	9.3e-05	UP
C2C2-GATA	PGSC0003DMG400031828	2.6881	4.65e-15	2.16e-14	UP
Orphans	PGSC0003DMG400032119	1.1494	2.66e-19	1.53e-18	UP
CPP	PGSC0003DMG400032257	1.5519	8.33e-31	7.87e-30	UP
NAC	PGSC0003DMG400032555	1.2352	0.001263	0.0025973	UP
AP2-EREBP	PGSC0003DMG400034101	1.358	2.61e-09	8.66e-09	UP
C2H2	PGSC0003DMG400034322	2.4826	1.56e-10	5.58e-10	UP
AP2-EREBP	PGSC0003DMG400036493	2.0331	1.29e-10	4.65e-10	UP
C2C2-GATA	PGSC0003DMG400038589	4.034	1.74e-07	5.06e-07	UP
MYB	PGSC0003DMG400038913	5.0294	5.95e-06	1.54e-05	UP
GRAS	PGSC0003DMG400039263	4.1731	2.73e-34	2.97e-33	UP
WRKY	PGSC0003DMG400044842	3.534	0.0019205	0.0038576	UP
CPP	PGSC0003DMG401000306	1.3879	1.46e-07	4.28e-07	UP
C2H2	PGSC0003DMG401000796	1.4958	6.07e-09	1.96e-08	UP
SET	PGSC0003DMG401007333	2.0716	1.94e-46	3.22e-45	UP
bHLH	PGSC0003DMG401007955	3.3715	1.23e-09	4.15e-09	UP
E2F-DP	PGSC0003DMG401008915	3.7564	2.9e-16	1.43e-15	UP
WRKY	PGSC0003DMG401010558	1.5166	1.15e-05	2.9e-05	UP
bHLH	PGSC0003DMG401012339	1.2965	4.8e-15	2.23e-14	UP
Trihelix	PGSC0003DMG401015244	1.1398	2.39e-12	9.57e-12	UP
S1Fa-like	PGSC0003DMG401017590	2.1201	2.65e-47	4.51e-46	UP
TAZ	PGSC0003DMG401026984	3.9261	8.78e-158	1.96e-155	UP
C2H2	PGSC0003DMG401030312	2.4112	0.0015706	0.0031911	UP
WRKY	PGSC0003DMG401033880	1.2576	9.06e-07	2.51e-06	UP
SET	PGSC0003DMG402011157	1.6087	4.29e-05	0.00010252	UP
NAC	PGSC0003DMG402023373	1.7524	1.52e-44	2.36e-43	UP
E2F-DP	PGSC0003DMG402024469	8.1894	3.86e-39	5.04e-38	UP
PHD	Novel00303	-2.7101	1.21e-65	3.51e-64	DOWN
ABI3VP1	Novel00397	-1.1829	2.59e-12	1.03e-11	DOWN
ABI3VP1	Novel00398	-1.9016	5.38e-20	3.18e-19	DOWN
C2H2	Novel00412	-1.3598	1.25e-12	5.07e-12	DOWN
C2H2	Novel00437	-1.3104	0.004684	0.0089526	DOWN
MYB	Novel00535	-1.7076	1.05e-35	1.2e-34	DOWN
C3H	Novel00564	-3.9935	1.7e-72	5.95e-71	DOWN
FAR1	Novel00600	-1.7479	3.27e-37	3.98e-36	DOWN
ABI3VP1	Novel00728	-3.5311	3.9e-149	7.34e-147	DOWN
C2H2	Novel00938	-1.3897	1.19e-24	8.7e-24	DOWN
SNF2	Novel00982	-1.8898	3.39e-46	5.58e-45	DOWN
DDT	Novel00991	-2.2863	1.63e-32	1.65e-31	DOWN
PHD	Novel01238	-2.5892	1.72e-74	6.38e-73	DOWN
Trihelix	Novel01383	-1.0152	1.19e-09	4.02e-09	DOWN
AP2-EREBP	Novel01437	-1.7657	1.75e-38	2.24e-37	DOWN
AUX/IAA	Novel01450	-1.7353	6.44e-42	9.19e-41	DOWN
CCAAT	Novel01527	-2.3222	3.82e-22	2.49e-21	DOWN
CCAAT	Novel01528	-2.6424	4.65e-58	1.09e-56	DOWN
FAR1	Novel01554	-3.3862	7.88e-22	5.07e-21	DOWN
SET	Novel01559	-2.3466	2.87e-73	1.02e-71	DOWN
C3H	Novel01563	-3.5327	2.02e-151	4.07e-149	DOWN
bZIP	Novel01587	-1.4862	2.5e-26	1.97e-25	DOWN
FAR1	Novel01605	-2.1423	5.03e-12	1.97e-11	DOWN
Orphans	Novel01700	-3.1468	8.56e-22	5.5e-21	DOWN
C3H	Novel01723	-3.0657	2.09e-99	1.41e-97	DOWN
SNF2	Novel01766	-1.5584	1.29e-30	1.21e-29	DOWN
NAC	Novel01771	-1.2365	5.64e-18	3.05e-17	DOWN
SNF2	Novel01944	-1.2069	2.88e-17	1.5e-16	DOWN
TCP	Novel02049	-3.2688	1.76e-98	1.18e-96	DOWN
C3H	Novel02087	-3.7482	2.21e-183	8.94e-181	DOWN
MYB	Novel02121	-1.2948	1.65e-25	1.25e-24	DOWN
Trihelix	Novel02135	-1.8833	4.63e-44	7.09e-43	DOWN
SNF2	Novel02150	-3.178	9.97e-76	3.84e-74	DOWN
G2-like	Novel02151	-1.4283	3.73e-22	2.43e-21	DOWN
bZIP	Novel02354	-2.2043	1.36e-35	1.56e-34	DOWN
MADS	Novel02537	-1.1776	4.43e-12	1.74e-11	DOWN
MYB	Novel02814	-2.6836	7.55e-98	4.94e-96	DOWN
MYB	Novel02944	-1.9769	1.34e-51	2.58e-50	DOWN
GeBP	Novel02987	-2.9723	4.46e-94	2.69e-92	DOWN
FAR1	Novel03085	-1.1707	1.11e-13	4.76e-13	DOWN
FAR1	Novel03157	-1.2517	1.2e-21	7.63e-21	DOWN
bZIP	Novel03175	-3.3574	5.52e-149	1.03e-146	DOWN
SRS	Novel03238	-1.8994	4.12e-11	1.53e-10	DOWN
PHD	Novel03534	-1.414	1.97e-26	1.56e-25	DOWN
FAR1	Novel03627	-1.9488	7.57e-41	1.04e-39	DOWN
bZIP	PGSC0003DMG400000088	-2.288	3.74e-44	5.74e-43	DOWN
ABI3VP1	PGSC0003DMG400000118	-1.3987	3.48e-09	1.14e-08	DOWN
MYB	PGSC0003DMG400000189	-1.9593	4.78e-52	9.36e-51	DOWN
C3H	PGSC0003DMG400000350	-1.9795	3.11e-55	6.63e-54	DOWN
C2C2-Dof	PGSC0003DMG400000441	-2.3752	9.31e-16	4.47e-15	DOWN
NAC	PGSC0003DMG400000555	-1.1488	6.81e-12	2.65e-11	DOWN
PHD	PGSC0003DMG400000673	-1.0567	2.09e-11	7.89e-11	DOWN
SWI/SNF-SWI3	PGSC0003DMG400000702	-3.1474	2.16e-127	2.5e-125	DOWN
bZIP	PGSC0003DMG400000799	-1.2543	4e-15	1.86e-14	DOWN
G2-like	PGSC0003DMG400000828	-2.5864	5.62e-11	2.07e-10	DOWN
TRAF	PGSC0003DMG400000885	-2.2106	2e-41	2.81e-40	DOWN
Rcd1-like	PGSC0003DMG400001086	-2.7396	8.32e-29	7.24e-28	DOWN
NAC	PGSC0003DMG400001323	-3.9814	2.81e-17	1.47e-16	DOWN
C2C2-Dof	PGSC0003DMG400001330	-2.3277	1.93e-43	2.91e-42	DOWN
MADS	PGSC0003DMG400001377	-2.4225	0.0075932	0.01412	DOWN
HMG	PGSC0003DMG400001414	-1.6814	3.56e-44	5.47e-43	DOWN
WRKY	PGSC0003DMG400001434	-2.0326	0.00050449	0.0010841	DOWN
FHA	PGSC0003DMG400001473	-1.6604	1.54e-35	1.76e-34	DOWN
AUX/IAA	PGSC0003DMG400001498	-5.4571	1.79e-17	9.43e-17	DOWN
MYB	PGSC0003DMG400001504	-2.5663	1.23e-07	3.63e-07	DOWN
GRAS	PGSC0003DMG400001556	-1.5974	1.48e-33	1.56e-32	DOWN
BBR/BPC	PGSC0003DMG400001660	-2.0699	2.11e-35	2.39e-34	DOWN
C2H2	PGSC0003DMG400001747	-1.5315	8.29e-05	0.00019248	DOWN
MYB	PGSC0003DMG400001749	-4.7356	3.08e-39	4.05e-38	DOWN
MYB	PGSC0003DMG400001913	-2.0051	3.39e-09	1.11e-08	DOWN
bHLH	PGSC0003DMG400002125	-1.9699	7.8e-05	0.00018177	DOWN
ABI3VP1	PGSC0003DMG400002392	-1.263	5.37e-18	2.9e-17	DOWN
MYB	PGSC0003DMG400002481	-2.2415	1.19e-60	2.97e-59	DOWN
C2C2-Dof	PGSC0003DMG400002507	-2.4297	9.21e-36	1.06e-34	DOWN
HB	PGSC0003DMG400002616	-1.8144	4.63e-35	5.19e-34	DOWN
Trihelix	PGSC0003DMG400002727	-2.7021	2.66e-77	1.07e-75	DOWN
Trihelix	PGSC0003DMG400002728	-1.9188	9.65e-05	0.00022278	DOWN
C2C2-YABBY	PGSC0003DMG400002883	-3.8365	0.0037367	0.0072351	DOWN
C3H	PGSC0003DMG400002893	-1.5991	2.13e-25	1.61e-24	DOWN
GRAS	PGSC0003DMG400003047	-4.0215	4e-70	1.32e-68	DOWN
HSF	PGSC0003DMG400003053	-2.0532	0.0066759	0.012507	DOWN
HSF	PGSC0003DMG400003160	-1.1174	1.59e-18	8.79e-18	DOWN
GRF	PGSC0003DMG400003220	-2.1009	2.97e-08	9.16e-08	DOWN
MYB	PGSC0003DMG400003295	-3.0262	5.91e-27	4.79e-26	DOWN
CCAAT	PGSC0003DMG400003357	-1.8171	2.18e-38	2.78e-37	DOWN
BBR/BPC	PGSC0003DMG400003553	-1.4958	1.32e-21	8.41e-21	DOWN
Orphans	PGSC0003DMG400003578	-1.1834	1.77e-10	6.29e-10	DOWN
TUB	PGSC0003DMG400003602	-1.3545	5.07e-19	2.87e-18	DOWN
C3H	PGSC0003DMG400003622	-1.3813	1.44e-24	1.05e-23	DOWN
BBR/BPC	PGSC0003DMG400003719	-1.0108	1.08e-13	4.64e-13	DOWN
PHD	PGSC0003DMG400003902	-1.7583	3.04e-41	4.23e-40	DOWN
NAC	PGSC0003DMG400003907	-1.8814	3.63e-14	1.61e-13	DOWN
IWS1	PGSC0003DMG400003992	-1.1515	1.79e-21	1.13e-20	DOWN
AP2-EREBP	PGSC0003DMG400004006	-1.3921	1.98e-16	9.87e-16	DOWN
SET	PGSC0003DMG400004008	-1.1026	9.34e-05	0.00021592	DOWN
BES1	PGSC0003DMG400004501	-1.9508	5.24e-53	1.04e-51	DOWN
HSF	PGSC0003DMG400004662	-5.042	1.44e-240	1.33e-237	DOWN
MYB	PGSC0003DMG400004780	-3.2846	0.00075213	0.0015867	DOWN
AP2-EREBP	PGSC0003DMG400004898	-1.1627	8.98e-22	5.76e-21	DOWN
SBP	PGSC0003DMG400005196	-1.0734	1.57e-19	9.11e-19	DOWN
WRKY	PGSC0003DMG400005329	-1.3406	4.5e-24	3.22e-23	DOWN
Trihelix	PGSC0003DMG400005408	-3.496	2.79e-43	4.19e-42	DOWN
C2C2-CO-like	PGSC0003DMG400005633	-2.9093	9.77e-05	0.0002254	DOWN
C3H	PGSC0003DMG400005636	-2.9937	2.33e-58	5.5e-57	DOWN
C2C2-Dof	PGSC0003DMG400005798	-3.0984	0.0032593	0.0063575	DOWN
NAC	PGSC0003DMG400005892	-2.1494	1.3e-05	3.24e-05	DOWN
EIL	PGSC0003DMG400005915	-1.3346	1.3e-25	9.91e-25	DOWN
Orphans	PGSC0003DMG400006145	-1.0126	2.55e-13	1.08e-12	DOWN
bZIP	PGSC0003DMG400006211	-2.532	1.36e-17	7.23e-17	DOWN
bZIP	PGSC0003DMG400006345	-1.6937	2.99e-21	1.87e-20	DOWN
TUB	PGSC0003DMG400006371	-3.5102	2.24e-141	3.28e-139	DOWN
bHLH	PGSC0003DMG400006569	-1.3865	7.84e-12	3.04e-11	DOWN
C3H	PGSC0003DMG400006828	-2.7298	2.82e-107	2.26e-105	DOWN
MBF1	PGSC0003DMG400007099	-1.0257	1.4e-08	4.42e-08	DOWN
CCAAT	PGSC0003DMG400007131	-2.9856	1.3e-08	4.12e-08	DOWN
C2H2	PGSC0003DMG400007202	-1.1011	5.22e-14	2.29e-13	DOWN
CCAAT	PGSC0003DMG400007350	-1.3352	7.12e-23	4.82e-22	DOWN
GNAT	PGSC0003DMG400007382	-1.1066	0.00011565	0.00026499	DOWN
MYB	PGSC0003DMG400007603	-1.7785	1.52e-19	8.83e-19	DOWN
PLATZ	PGSC0003DMG400007670	-1.3008	1.29e-17	6.85e-17	DOWN
Orphans	PGSC0003DMG400007749	-3.9979	2.72e-14	1.21e-13	DOWN
Trihelix	PGSC0003DMG400007806	-2.2488	4.83e-40	6.48e-39	DOWN
ARR-B	PGSC0003DMG400007823	-1.2509	2.11e-16	1.05e-15	DOWN
RWP-RK	PGSC0003DMG400007847	-1.1289	1.77e-16	8.86e-16	DOWN
NAC	PGSC0003DMG400007953	-1.307	1.19e-10	4.27e-10	DOWN
HB	PGSC0003DMG400008057	-4.3	1.7e-171	5.54e-169	DOWN
ARF	PGSC0003DMG400008081	-2.2248	1.78e-14	8.01e-14	DOWN
HSF	PGSC0003DMG400008223	-1.595	4.08e-34	4.4e-33	DOWN
MYB	PGSC0003DMG400008454	-1.1674	2.57e-12	1.02e-11	DOWN
HMG	PGSC0003DMG400008501	-2.3126	1.77e-75	6.75e-74	DOWN
EIL	PGSC0003DMG400008712	-4.3647	6.64e-238	5.78e-235	DOWN
SNF2	PGSC0003DMG400008774	-1.9513	1.53e-36	1.81e-35	DOWN
C2C2-Dof	PGSC0003DMG400008914	-2.2076	3.57e-27	2.92e-26	DOWN
CCAAT	PGSC0003DMG400008989	-1.7685	6.47e-35	7.21e-34	DOWN
SET	PGSC0003DMG400009044	-3.8928	4.33e-147	7.55e-145	DOWN
C2H2	PGSC0003DMG400009082	-2.2188	1.44e-64	4.04e-63	DOWN
PHD	PGSC0003DMG400009121	-1.1759	6.4e-16	3.1e-15	DOWN
NAC	PGSC0003DMG400009245	-2.2893	4.67e-40	6.26e-39	DOWN
TCP	PGSC0003DMG400009276	-1.9566	9.22e-30	8.36e-29	DOWN
bZIP	PGSC0003DMG400009449	-1.1445	1.25e-16	6.29e-16	DOWN
ABI3VP1	PGSC0003DMG400009773	-1.4662	7.36e-26	5.68e-25	DOWN
C2H2	PGSC0003DMG400009859	-2.7409	1.72e-06	4.65e-06	DOWN
bZIP	PGSC0003DMG400010008	-2.5958	7.12e-93	4.19e-91	DOWN
Trihelix	PGSC0003DMG400010197	-2.3913	5.67e-24	4.03e-23	DOWN
AP2-EREBP	PGSC0003DMG400010285	-4.5557	1.94e-07	5.63e-07	DOWN
SNF2	PGSC0003DMG400010603	-1.886	3.16e-09	1.04e-08	DOWN
SNF2	PGSC0003DMG400010604	-2.9156	0.00023729	0.00052785	DOWN
Jumonji	PGSC0003DMG400010853	-2.3964	1.3e-34	1.43e-33	DOWN
Jumonji	PGSC0003DMG400010891	-2.2853	5.63e-64	1.55e-62	DOWN
MYB	PGSC0003DMG400011294	-3.791	2.2e-11	8.33e-11	DOWN
SBP	PGSC0003DMG400011433	-2.1277	9.58e-10	3.26e-09	DOWN
G2-like	PGSC0003DMG400011435	-3.859	1.9e-08	5.95e-08	DOWN
MYB	PGSC0003DMG400011500	-2.584	5.89e-95	3.63e-93	DOWN
ARR-B	PGSC0003DMG400011980	-2.392	1.55e-67	4.77e-66	DOWN
AP2-EREBP	PGSC0003DMG400012038	-3.1994	1.81e-98	1.2e-96	DOWN
TRAF	PGSC0003DMG400012312	-2.0238	7.71e-59	1.85e-57	DOWN
AP2-EREBP	PGSC0003DMG400012524	-1.4964	0.00058264	0.0012434	DOWN
AP2-EREBP	PGSC0003DMG400012525	-2.4575	9.74e-05	0.00022475	DOWN
LUG	PGSC0003DMG400012814	-2.346	2.68e-06	7.12e-06	DOWN
LUG	PGSC0003DMG400012815	-2.1803	1e-11	3.86e-11	DOWN
HMG	PGSC0003DMG400013103	-2.6915	0.0015601	0.0031708	DOWN
ABI3VP1	PGSC0003DMG400013106	-3.8078	0.0033158	0.0064625	DOWN
RWP-RK	PGSC0003DMG400013140	-1.3905	7.75e-27	6.25e-26	DOWN
AP2-EREBP	PGSC0003DMG400013255	-2.3447	0.00020197	0.00045197	DOWN
Trihelix	PGSC0003DMG400013300	-3.0382	4.33e-75	1.63e-73	DOWN
G2-like	PGSC0003DMG400013324	-1.6425	0.003577	0.0069392	DOWN
AUX/IAA	PGSC0003DMG400013445	-3.3417	0.0080927	0.014989	DOWN
RWP-RK	PGSC0003DMG400013616	-1.0986	1.13e-09	3.84e-09	DOWN
C3H	PGSC0003DMG400013655	-2.0581	7.83e-54	1.6e-52	DOWN
AUX/IAA	PGSC0003DMG400013765	-3.2913	3.89e-07	1.11e-06	DOWN
Trihelix	PGSC0003DMG400014176	-1.2192	0.0059959	0.011307	DOWN
ARF	PGSC0003DMG400014179	-1.8071	2.58e-44	4e-43	DOWN
HSF	PGSC0003DMG400014323	-4.3878	1.53e-99	1.04e-97	DOWN
AP2-EREBP	PGSC0003DMG400014417	-2.0168	5.95e-31	5.66e-30	DOWN
Rcd1-like	PGSC0003DMG400014419	-1.1508	6.48e-05	0.00015232	DOWN
C3H	PGSC0003DMG400014565	-2.287	5.08e-61	1.29e-59	DOWN
bHLH	PGSC0003DMG400014705	-1.8972	1.48e-13	6.31e-13	DOWN
G2-like	PGSC0003DMG400014803	-1.604	5.2e-11	1.92e-10	DOWN
GRAS	PGSC0003DMG400014900	-1.7341	3.14e-28	2.67e-27	DOWN
C2H2	PGSC0003DMG400015498	-1.106	1.07e-14	4.88e-14	DOWN
MYB	PGSC0003DMG400015536	-3.2236	1.76e-14	7.93e-14	DOWN
ABI3VP1	PGSC0003DMG400015771	-1.0847	9.42e-17	4.78e-16	DOWN
AP2-EREBP	PGSC0003DMG400015880	-1.8609	1.7e-39	2.25e-38	DOWN
AP2-EREBP	PGSC0003DMG400016004	-1.7565	0.0095777	0.017551	DOWN
MADS	PGSC0003DMG400016203	-1.1372	0.0002475	0.00054937	DOWN
C3H	PGSC0003DMG400016236	-2.3672	8.42e-71	2.84e-69	DOWN
AUX/IAA	PGSC0003DMG400016317	-3.3623	2.22e-31	2.15e-30	DOWN
TCP	PGSC0003DMG400016363	-1.9592	3.62e-51	6.89e-50	DOWN
SET	PGSC0003DMG400016732	-1.155	4.3e-12	1.69e-11	DOWN
EIL	PGSC0003DMG400016747	-4.1336	1.66e-09	5.57e-09	DOWN
IWS1	PGSC0003DMG400016781	-1.7076	1.96e-46	3.25e-45	DOWN
AP2-EREBP	PGSC0003DMG400016812	-2.1187	1.83e-07	5.33e-07	DOWN
NAC	PGSC0003DMG400016896	-2.4122	0.0012363	0.0025458	DOWN
bZIP	PGSC0003DMG400016906	-1.1863	8.57e-07	2.38e-06	DOWN
Orphans	PGSC0003DMG400017148	-5.2245	2.11e-09	7.03e-09	DOWN
SET	PGSC0003DMG400017150	-4.0318	3.38e-13	1.42e-12	DOWN
bHLH	PGSC0003DMG400017181	-1.1173	2.07e-05	5.09e-05	DOWN
HSF	PGSC0003DMG400017484	-1.2338	1.5e-05	3.72e-05	DOWN
SET	PGSC0003DMG400017559	-1.3569	1.74e-13	7.42e-13	DOWN
FHA	PGSC0003DMG400017739	-1.3261	8.8e-17	4.47e-16	DOWN
SET	PGSC0003DMG400017957	-5.0916	3.78e-272	5.72e-269	DOWN
MYB	PGSC0003DMG400018092	-1.1212	0.0034871	0.0067756	DOWN
HMG	PGSC0003DMG400018099	-1.2641	3.74e-22	2.44e-21	DOWN
bHLH	PGSC0003DMG400018280	-1.7373	1.29e-34	1.42e-33	DOWN
C2C2-Dof	PGSC0003DMG400018408	-4.288	8.72e-30	7.92e-29	DOWN
G2-like	PGSC0003DMG400018426	-1.2982	0.0050887	0.0096798	DOWN
G2-like	PGSC0003DMG400018472	-1.2859	0.0019489	0.0039116	DOWN
MYB	PGSC0003DMG400018702	-2.779	2.05e-55	4.39e-54	DOWN
AP2-EREBP	PGSC0003DMG400018803	-1.2977	6.78e-08	2.04e-07	DOWN
C2C2-Dof	PGSC0003DMG400018886	-2.1225	1.41e-19	8.17e-19	DOWN
bHLH	PGSC0003DMG400018950	-2.0214	3.52e-08	1.08e-07	DOWN
Orphans	PGSC0003DMG400019025	-1.3326	7.46e-06	1.91e-05	DOWN
C2C2-Dof	PGSC0003DMG400019155	-1.3192	0.0039229	0.0075775	DOWN
NAC	PGSC0003DMG400019293	-4.5535	1.02e-07	3.03e-07	DOWN
C2H2	PGSC0003DMG400019342	-3.139	0.00044054	0.00095128	DOWN
HSF	PGSC0003DMG400019344	-3.179	7.24e-28	6.07e-27	DOWN
C2C2-Dof	PGSC0003DMG400019528	-3.1927	8.3e-06	2.12e-05	DOWN
HB	PGSC0003DMG400019580	-2.3817	0.0093786	0.017207	DOWN
MADS	PGSC0003DMG400019742	-2.0632	1.47e-53	2.99e-52	DOWN
LUG	PGSC0003DMG400020093	-1.007	1.39e-16	6.98e-16	DOWN
FHA	PGSC0003DMG400020100	-1.8828	4.14e-24	2.96e-23	DOWN
OFP	PGSC0003DMG400020414	-4.4069	0.00014023	0.00031878	DOWN
G2-like	PGSC0003DMG400020455	-2.9038	0.0018981	0.0038161	DOWN
AP2-EREBP	PGSC0003DMG400020625	-1.7665	1.95e-39	2.57e-38	DOWN
C3H	PGSC0003DMG400020705	-1.33	1.01e-20	6.18e-20	DOWN
MYB	PGSC0003DMG400020730	-1.4424	0.00011453	0.00026256	DOWN
bHLH	PGSC0003DMG400020807	-2.8253	3.74e-39	4.89e-38	DOWN
PHD	PGSC0003DMG400021118	-2.655	1.12e-65	3.25e-64	DOWN
TRAF	PGSC0003DMG400021210	-1.005	2.58e-12	1.03e-11	DOWN
CCAAT	PGSC0003DMG400021365	-1.365	2.83e-14	1.26e-13	DOWN
MYB	PGSC0003DMG400021459	-2.0943	8.01e-47	1.34e-45	DOWN
bHLH	PGSC0003DMG400022058	-1.1252	3.2e-09	1.05e-08	DOWN
WRKY	PGSC0003DMG400022143	-1.3008	1.17e-25	8.97e-25	DOWN
C3H	PGSC0003DMG400022185	-2.5996	8.16e-23	5.5e-22	DOWN
WRKY	PGSC0003DMG400022290	-2.3682	8.67e-45	1.36e-43	DOWN
MYB	PGSC0003DMG400022422	-1.8362	4.94e-07	1.39e-06	DOWN
Jumonji	PGSC0003DMG400022424	-1.1068	1.64e-17	8.66e-17	DOWN
GeBP	PGSC0003DMG400022471	-1.0202	8.87e-13	3.63e-12	DOWN
TUB	PGSC0003DMG400022549	-1.0057	1.81e-08	5.68e-08	DOWN
SNF2	PGSC0003DMG400022675	-1.7859	6.35e-49	1.13e-47	DOWN
AP2-EREBP	PGSC0003DMG400022695	-1.809	2.49e-38	3.16e-37	DOWN
bZIP	PGSC0003DMG400022706	-2.1564	1.42e-37	1.75e-36	DOWN
C2H2	PGSC0003DMG400022776	-2.8983	0.0048373	0.0092302	DOWN
SBP	PGSC0003DMG400022824	-2.9857	0.00029412	0.00064695	DOWN
bZIP	PGSC0003DMG400022931	-1.1653	1.17e-05	2.94e-05	DOWN
NAC	PGSC0003DMG400023447	-1.605	2.31e-14	1.03e-13	DOWN
MYB	PGSC0003DMG400023495	-3.1855	2.21e-39	2.92e-38	DOWN
ARR-B	PGSC0003DMG400023534	-1.7703	1.57e-40	2.14e-39	DOWN
GRAS	PGSC0003DMG400023556	-1.1824	0.0021824	0.004359	DOWN
C2C2-GATA	PGSC0003DMG400023781	-3.4135	5.01e-07	1.41e-06	DOWN
SNF2	PGSC0003DMG400023950	-2.0304	5.26e-60	1.3e-58	DOWN
Trihelix	PGSC0003DMG400024107	-1.6076	3.35e-20	2e-19	DOWN
HB	PGSC0003DMG400024157	-3.0941	2.68e-37	3.27e-36	DOWN
MYB	PGSC0003DMG400024572	-3.3812	4e-90	2.19e-88	DOWN
C3H	PGSC0003DMG400024801	-2.1794	1.11e-69	3.62e-68	DOWN
SWI/SNF-BAF60b	PGSC0003DMG400024881	-2.0432	4.61e-11	1.71e-10	DOWN
TCP	PGSC0003DMG400024928	-2.8027	1.91e-104	1.41e-102	DOWN
LOB	PGSC0003DMG400024936	-1.6035	1.4e-05	3.5e-05	DOWN
MYB	PGSC0003DMG400024983	-1.0578	1.03e-13	4.43e-13	DOWN
C2C2-Dof	PGSC0003DMG400025129	-2.5546	7.07e-43	1.05e-41	DOWN
C3H	PGSC0003DMG400025459	-1.9521	8.93e-18	4.77e-17	DOWN
MYB	PGSC0003DMG400025612	-2.2547	1.86e-13	7.92e-13	DOWN
MYB	PGSC0003DMG400025632	-2.5987	3.13e-06	8.3e-06	DOWN
G2-like	PGSC0003DMG400025801	-1.4229	1.12e-29	1.01e-28	DOWN
HB	PGSC0003DMG400025984	-3.1735	6.76e-14	2.95e-13	DOWN
Orphans	PGSC0003DMG400026181	-2.5941	0.0064315	0.012075	DOWN
GeBP	PGSC0003DMG400026195	-1.6083	2.42e-28	2.07e-27	DOWN
C2C2-GATA	PGSC0003DMG400026248	-1.2683	2.1e-21	1.32e-20	DOWN
HB	PGSC0003DMG400026264	-2.4127	9.99e-30	9.05e-29	DOWN
HB	PGSC0003DMG400026460	-1.5693	1.12e-33	1.19e-32	DOWN
C3H	PGSC0003DMG400026471	-1.0112	6.92e-07	1.93e-06	DOWN
C3H	PGSC0003DMG400026524	-2.7962	7.61e-55	1.61e-53	DOWN
GRAS	PGSC0003DMG400026643	-1.4267	0.00018137	0.00040761	DOWN
C2H2	PGSC0003DMG400026959	-1.2645	8.21e-06	2.09e-05	DOWN
IWS1	PGSC0003DMG400027098	-1.2185	1.26e-23	8.8e-23	DOWN
MYB	PGSC0003DMG400027190	-1.452	8.32e-21	5.13e-20	DOWN
ABI3VP1	PGSC0003DMG400027236	-1.6255	2.3e-16	1.14e-15	DOWN
Orphans	PGSC0003DMG400027274	-1.3089	8.28e-07	2.3e-06	DOWN
CCAAT	PGSC0003DMG400027390	-2.0913	2.58e-17	1.35e-16	DOWN
bZIP	PGSC0003DMG400027562	-1.2603	4.87e-10	1.69e-09	DOWN
Orphans	PGSC0003DMG400027651	-1.8135	5.23e-44	7.99e-43	DOWN
C3H	PGSC0003DMG400027902	-1.735	7.89e-46	1.28e-44	DOWN
bHLH	PGSC0003DMG400027959	-1.0084	4.45e-06	1.16e-05	DOWN
MYB	PGSC0003DMG400028098	-6.8138	2.52e-09	8.35e-09	DOWN
C3H	PGSC0003DMG400028265	-1.1838	4.99e-23	3.41e-22	DOWN
BES1	PGSC0003DMG400028459	-1.2452	6.98e-12	2.71e-11	DOWN
NAC	PGSC0003DMG400028662	-1.7169	7.1e-24	5.02e-23	DOWN
Orphans	PGSC0003DMG400028694	-1.1339	5.12e-09	1.66e-08	DOWN
Orphans	PGSC0003DMG400028818	-1.7978	3.52e-18	1.92e-17	DOWN
bZIP	PGSC0003DMG400029118	-1.5077	2.37e-16	1.17e-15	DOWN
WRKY	PGSC0003DMG400029207	-2.3502	1.58e-08	4.98e-08	DOWN
C2C2-CO-like	PGSC0003DMG400029365	-2.1248	7.21e-08	2.17e-07	DOWN
Orphans	PGSC0003DMG400029426	-1.3018	2.3e-17	1.2e-16	DOWN
C2C2-Dof	PGSC0003DMG400029708	-2.5362	0.0001228	0.0002808	DOWN
NAC	PGSC0003DMG400029741	-1.7636	0.0022998	0.0045724	DOWN
Trihelix	PGSC0003DMG400029747	-1.3059	1.16e-05	2.91e-05	DOWN
MBF1	PGSC0003DMG400029773	-2.1296	8.78e-27	7.05e-26	DOWN
bZIP	PGSC0003DMG400029774	-1.9695	2.06e-11	7.78e-11	DOWN
Orphans	PGSC0003DMG400029839	-2.2713	2.64e-07	7.58e-07	DOWN
Orphans	PGSC0003DMG400029852	-2.3372	0.003837	0.0074184	DOWN
GRAS	PGSC0003DMG400029921	-1.9209	7.5e-14	3.26e-13	DOWN
Trihelix	PGSC0003DMG400030023	-1.9999	2.62e-47	4.48e-46	DOWN
AP2-EREBP	PGSC0003DMG400030228	-5.46	0.0017286	0.0034909	DOWN
C3H	PGSC0003DMG400030361	-1.4976	7.06e-34	7.55e-33	DOWN
G2-like	PGSC0003DMG400030389	-1.7903	4.89e-13	2.03e-12	DOWN
MYB	PGSC0003DMG400030397	-3.1782	3.49e-72	1.22e-70	DOWN
C2C2-Dof	PGSC0003DMG400030406	-1.243	1.18e-05	2.97e-05	DOWN
GRAS	PGSC0003DMG400030468	-2.6831	8.36e-25	6.16e-24	DOWN
HB	PGSC0003DMG400030737	-1.2836	3.19e-26	2.5e-25	DOWN
C3H	PGSC0003DMG400030758	-1.4014	1.26e-07	3.73e-07	DOWN
SNF2	PGSC0003DMG400030952	-1.4308	6.59e-25	4.88e-24	DOWN
PHD	PGSC0003DMG400030955	-1.7239	2.45e-35	2.77e-34	DOWN
CCAAT	PGSC0003DMG400030986	-3.0313	0.0013509	0.0027679	DOWN
ABI3VP1	PGSC0003DMG400031023	-2.6337	2.46e-22	1.62e-21	DOWN
ABI3VP1	PGSC0003DMG400031024	-1.7338	3.73e-31	3.57e-30	DOWN
ARID	PGSC0003DMG400031288	-3.3061	0.0024167	0.0047932	DOWN
G2-like	PGSC0003DMG400031299	-1.6074	1.12e-05	2.82e-05	DOWN
SET	PGSC0003DMG400031307	-1.5944	1.07e-14	4.88e-14	DOWN
bHLH	PGSC0003DMG400031314	-2.7831	1.54e-29	1.39e-28	DOWN
mTERF	PGSC0003DMG400031337	-3.0929	4.63e-06	1.21e-05	DOWN
TAZ	PGSC0003DMG400031372	-1.6437	1.08e-12	4.4e-12	DOWN
C3H	PGSC0003DMG400031374	-1.3452	2.14e-17	1.13e-16	DOWN
Trihelix	PGSC0003DMG400031382	-1.7169	1.83e-37	2.25e-36	DOWN
HB	PGSC0003DMG400031777	-1.6824	0.00012531	0.00028628	DOWN
OFP	PGSC0003DMG400032276	-3.9125	2.01e-16	1e-15	DOWN
CCAAT	PGSC0003DMG400032552	-1.3016	6.63e-16	3.21e-15	DOWN
SNF2	PGSC0003DMG400032815	-1.1791	2.35e-07	6.8e-07	DOWN
MYB	PGSC0003DMG400033030	-1.3388	1.02e-13	4.38e-13	DOWN
C2C2-Dof	PGSC0003DMG400033046	-4.6727	8.03e-140	1.14e-137	DOWN
MADS	PGSC0003DMG400033570	-2.0959	1.45e-16	7.29e-16	DOWN
HRT	PGSC0003DMG400033614	-1.6378	8.64e-27	6.95e-26	DOWN
CCAAT	PGSC0003DMG400034306	-1.4396	1.46e-07	4.3e-07	DOWN
C2C2-Dof	PGSC0003DMG400037029	-1.6652	0.0037205	0.0072059	DOWN
bZIP	PGSC0003DMG400037980	-2.2711	1.64e-05	4.07e-05	DOWN
AP2-EREBP	PGSC0003DMG400040046	-1.7034	0.0086237	0.015905	DOWN
MADS	PGSC0003DMG400042442	-1.9306	0.0018426	0.0037103	DOWN
C3H	PGSC0003DMG400042570	-1.8003	6.88e-07	1.92e-06	DOWN
C2C2-GATA	PGSC0003DMG400044001	-2.4029	1.64e-05	4.05e-05	DOWN
CCAAT	PGSC0003DMG400044580	-1.9138	3.51e-09	1.15e-08	DOWN
GeBP	PGSC0003DMG400046446	-2.5473	6.54e-33	6.75e-32	DOWN
SNF2	PGSC0003DMG401000051	-1.114	1.46e-08	4.61e-08	DOWN
HSF	PGSC0003DMG401002683	-2.9048	2.83e-93	1.68e-91	DOWN
E2F-DP	PGSC0003DMG401005482	-2.7603	8.34e-33	8.58e-32	DOWN
WRKY	PGSC0003DMG401005575	-1.6375	3.59e-35	4.04e-34	DOWN
RWP-RK	PGSC0003DMG401005796	-2.0184	2.02e-49	3.64e-48	DOWN
SBP	PGSC0003DMG401006284	-1.9473	2.06e-53	4.16e-52	DOWN
HB	PGSC0003DMG401008054	-2.5118	1.22e-70	4.07e-69	DOWN
ABI3VP1	PGSC0003DMG401009541	-1.3735	3.64e-14	1.61e-13	DOWN
Orphans	PGSC0003DMG401010056	-3.9888	5.09e-55	1.08e-53	DOWN
MYB	PGSC0003DMG401010883	-3.6902	6.75e-20	3.98e-19	DOWN
SWI/SNF-BAF60b	PGSC0003DMG401012010	-1.383	2.14e-23	1.48e-22	DOWN
ABI3VP1	PGSC0003DMG401015175	-1.3784	9.86e-18	5.26e-17	DOWN
GNAT	PGSC0003DMG401015202	-1.5345	9.31e-37	1.11e-35	DOWN
bHLH	PGSC0003DMG401015926	-2.0278	1.97e-30	1.84e-29	DOWN
PHD	PGSC0003DMG401017043	-1.698	1.14e-16	5.74e-16	DOWN
zf-HD	PGSC0003DMG401017193	-1.8075	2.87e-23	1.98e-22	DOWN
ARF	PGSC0003DMG401018664	-1.015	4.07e-14	1.79e-13	DOWN
MADS	PGSC0003DMG401018787	-1.5606	3e-05	7.26e-05	DOWN
ARID	PGSC0003DMG401018896	-1.503	4.81e-05	0.00011423	DOWN
HSF	PGSC0003DMG401019343	-3.7213	1.37e-83	6.37e-82	DOWN
TRAF	PGSC0003DMG401020126	-1.2152	6.79e-19	3.82e-18	DOWN
CCAAT	PGSC0003DMG401021124	-2.0767	7.49e-30	6.82e-29	DOWN
MADS	PGSC0003DMG401024252	-1.9642	3.48e-09	1.14e-08	DOWN
CCAAT	PGSC0003DMG401024603	-2.96	1.15e-08	3.65e-08	DOWN
MYB	PGSC0003DMG401025742	-1.2713	1.29e-12	5.25e-12	DOWN
bHLH	PGSC0003DMG401028788	-3.026	1.8e-93	1.07e-91	DOWN
SBP	PGSC0003DMG401029709	-2.6887	2.19e-16	1.09e-15	DOWN
CCAAT	PGSC0003DMG401030137	-1.0019	1.05e-14	4.77e-14	DOWN
GNAT	PGSC0003DMG401031287	-1.235	6.27e-14	2.74e-13	DOWN
RWP-RK	PGSC0003DMG401032501	-1.8148	9.99e-21	6.14e-20	DOWN
ABI3VP1	PGSC0003DMG402009541	-2.1658	5.84e-29	5.12e-28	DOWN
C2C2-CO-like	PGSC0003DMG402010056	-3.3243	1.06e-72	3.73e-71	DOWN
AP2-EREBP	PGSC0003DMG402013892	-1.8549	1.6e-14	7.2e-14	DOWN
CCAAT	PGSC0003DMG402015259	-1.3252	1.08e-18	6e-18	DOWN
MYB	PGSC0003DMG402017733	-1.7592	5e-33	5.19e-32	DOWN
PHD	PGSC0003DMG402018008	-1.2767	0.0028678	0.0056401	DOWN
HMG	PGSC0003DMG402018896	-1.4627	1.09e-18	6.06e-18	DOWN
HSF	PGSC0003DMG402019343	-2.9788	1.3e-54	2.7e-53	DOWN
TRAF	PGSC0003DMG402020126	-2.6314	1.59e-10	5.69e-10	DOWN
CCAAT	PGSC0003DMG402021124	-3.1904	0.00036886	0.00080223	DOWN
PHD	PGSC0003DMG402022202	-1.1762	1.31e-11	5.02e-11	DOWN
C3H	PGSC0003DMG402025318	-1.3982	1.12e-16	5.68e-16	DOWN
SBP	PGSC0003DMG402029709	-2.9069	3.94e-05	9.45e-05	DOWN
MYB	PGSC0003DMG402030895	-1.6741	1.27e-16	6.37e-16	DOWN
C2H2	PGSC0003DMG402031064	-2.9941	1.37e-16	6.86e-16	DOWN
WRKY	PGSC0003DMG402033880	-1.4709	9.07e-11	3.29e-10	DOWN
SOH1	PGSC0003DMG403008332	-1.1039	1.95e-10	6.93e-10	DOWN
C2C2-GATA	PGSC0003DMG403025785	-3.0561	6.3e-86	3.1e-84	DOWN
MADS	PGSC0003DMG403026197	-1.7318	7.01e-21	4.33e-20	DOWN

## Sheet: 24 h
Table S7 The transcriptional factors in response to cut-wounding at different time
Family	Gene_ID	log2FoldChange(X2_24h vs X2_0h)	pval(X2_24h vs X2_0h)	padj(X2_24h vs X2_0h)	significant(X2_24h vs X2_0h)
WRKY	PGSC0003DMG402006935	2.9254	0.0079694	0.015001	UP
PHD	Novel00303	-2.4729	1.26e-53	3.28e-52	DOWN
ABI3VP1	Novel00397	-1.0977	1.51e-09	5.44e-09	DOWN
ABI3VP1	Novel00398	-1.5915	2.61e-14	1.3e-13	DOWN
C2H2	Novel00437	-1.4126	0.0018437	0.0037793	DOWN
MYB	Novel00535	-2.0064	3.39e-37	4.76e-36	DOWN
C3H	Novel00564	-3.6642	1.43e-71	6.5e-70	DOWN
FAR1	Novel00600	-1.5914	5.63e-25	4.72e-24	DOWN
ABI3VP1	Novel00728	-2.7951	1.58e-77	8.42e-76	DOWN
C2H2	Novel00938	-1.5955	1.49e-24	1.23e-23	DOWN
SNF2	Novel00982	-1.8663	3.47e-40	5.55e-39	DOWN
DDT	Novel00991	-2.4467	2.06e-34	2.57e-33	DOWN
PHD	Novel01238	-2.4246	1.21e-52	3.07e-51	DOWN
AP2-EREBP	Novel01437	-1.5234	1.28e-23	1.01e-22	DOWN
AUX/IAA	Novel01450	-1.7967	4.49e-34	5.52e-33	DOWN
CCAAT	Novel01527	-3.0722	8.39e-30	8.68e-29	DOWN
CCAAT	Novel01528	-2.101	2.61e-33	3.12e-32	DOWN
FAR1	Novel01554	-3.0748	2.02e-18	1.24e-17	DOWN
SET	Novel01559	-2.1748	4.4e-49	9.78e-48	DOWN
C3H	Novel01563	-3.8372	4.06e-129	7.73e-127	DOWN
bZIP	Novel01587	-1.5423	5.96e-23	4.55e-22	DOWN
FAR1	Novel01605	-1.4485	9.08e-07	2.63e-06	DOWN
Orphans	Novel01700	-2.3088	4.19e-16	2.31e-15	DOWN
C3H	Novel01723	-3.0401	1.97e-77	1.05e-75	DOWN
SNF2	Novel01766	-1.9002	1.95e-34	2.43e-33	DOWN
SNF2	Novel01944	-1.5926	1.12e-22	8.45e-22	DOWN
TCP	Novel02049	-2.9966	1.81e-68	7.33e-67	DOWN
C3H	Novel02087	-3.8135	2.44e-138	5.7e-136	DOWN
MYB	Novel02121	-1.4293	2.71e-23	2.1e-22	DOWN
Trihelix	Novel02135	-1.6851	3.37e-28	3.26e-27	DOWN
SNF2	Novel02150	-3.2176	2.23e-72	1.05e-70	DOWN
bZIP	Novel02354	-2.4798	2.41e-38	3.56e-37	DOWN
MADS	Novel02537	-1.3321	4.87e-16	2.67e-15	DOWN
MYB	Novel02814	-2.6517	3.45e-71	1.55e-69	DOWN
MYB	Novel02944	-2.2614	1.52e-49	3.44e-48	DOWN
GeBP	Novel02987	-2.7045	9.15e-64	3.25e-62	DOWN
FAR1	Novel03157	-1.5583	8.1e-25	6.76e-24	DOWN
bZIP	Novel03175	-2.6507	8.01e-74	3.9e-72	DOWN
SRS	Novel03238	-2.1046	9.09e-13	4.11e-12	DOWN
PHD	Novel03534	-1.6004	1.57e-25	1.35e-24	DOWN
FAR1	Novel03627	-2.1444	6.75e-45	1.3e-43	DOWN
bZIP	PGSC0003DMG400000088	-2.3939	2.1e-45	4.1e-44	DOWN
ABI3VP1	PGSC0003DMG400000118	-1.1064	2.02e-07	6.2e-07	DOWN
MYB	PGSC0003DMG400000189	-2.2704	5.11e-52	1.26e-50	DOWN
C3H	PGSC0003DMG400000350	-1.5658	5.8e-28	5.58e-27	DOWN
C2C2-Dof	PGSC0003DMG400000441	-1.7542	1.25e-09	4.54e-09	DOWN
SWI/SNF-SWI3	PGSC0003DMG400000702	-2.8473	3.98e-80	2.25e-78	DOWN
bZIP	PGSC0003DMG400000799	-1.4003	3.36e-15	1.76e-14	DOWN
G2-like	PGSC0003DMG400000828	-1.2453	0.00068021	0.0014713	DOWN
TRAF	PGSC0003DMG400000885	-1.5053	6.73e-23	5.13e-22	DOWN
Rcd1-like	PGSC0003DMG400001086	-1.895	5.53e-15	2.87e-14	DOWN
NAC	PGSC0003DMG400001323	-2.7254	2.62e-10	1e-09	DOWN
MADS	PGSC0003DMG400001377	-3.7448	0.00048007	0.0010598	DOWN
HMG	PGSC0003DMG400001414	-2.9155	1.03e-85	6.82e-84	DOWN
FHA	PGSC0003DMG400001473	-1.9213	8.2e-36	1.09e-34	DOWN
AUX/IAA	PGSC0003DMG400001498	-4.2722	8.77e-14	4.23e-13	DOWN
MYB	PGSC0003DMG400001504	-4.8733	4.63e-16	2.54e-15	DOWN
GRAS	PGSC0003DMG400001556	-1.4606	6.92e-22	5.01e-21	DOWN
BBR/BPC	PGSC0003DMG400001660	-2.4321	2.54e-38	3.75e-37	DOWN
C2H2	PGSC0003DMG400001747	-1.0091	0.0052965	0.010239	DOWN
MYB	PGSC0003DMG400001749	-4.1255	2.69e-33	3.2e-32	DOWN
ABI3VP1	PGSC0003DMG400002392	-1.1798	5.62e-13	2.58e-12	DOWN
MYB	PGSC0003DMG400002481	-2.1171	5.4e-43	9.59e-42	DOWN
C2C2-Dof	PGSC0003DMG400002507	-2.6342	2.27e-40	3.68e-39	DOWN
HB	PGSC0003DMG400002616	-2.0752	1.16e-35	1.53e-34	DOWN
Trihelix	PGSC0003DMG400002727	-2.8263	3.08e-69	1.29e-67	DOWN
C3H	PGSC0003DMG400002893	-1.7809	1.4e-24	1.16e-23	DOWN
HSF	PGSC0003DMG400003053	-3.0513	0.00056198	0.0012301	DOWN
HSF	PGSC0003DMG400003160	-1.5488	4.56e-26	4.02e-25	DOWN
GRF	PGSC0003DMG400003220	-1.6584	3.93e-06	1.08e-05	DOWN
MYB	PGSC0003DMG400003295	-2.803	7.92e-24	6.33e-23	DOWN
CCAAT	PGSC0003DMG400003357	-2.273	2.87e-45	5.58e-44	DOWN
TUB	PGSC0003DMG400003602	-1.9701	6.66e-29	6.64e-28	DOWN
C3H	PGSC0003DMG400003622	-1.3816	1.46e-19	9.49e-19	DOWN
BBR/BPC	PGSC0003DMG400003719	-1.0651	7.14e-12	3.04e-11	DOWN
PHD	PGSC0003DMG400003902	-1.2879	2.77e-18	1.69e-17	DOWN
NAC	PGSC0003DMG400003907	-2.0317	3.96e-14	1.95e-13	DOWN
AP2-EREBP	PGSC0003DMG400004006	-1.7321	1.43e-19	9.28e-19	DOWN
SET	PGSC0003DMG400004008	-1.2312	1.75e-06	4.94e-06	DOWN
BES1	PGSC0003DMG400004501	-1.8646	6.27e-37	8.72e-36	DOWN
HSF	PGSC0003DMG400004662	-3.9013	2.12e-141	5.25e-139	DOWN
AP2-EREBP	PGSC0003DMG400004898	-1.0571	3.16e-14	1.57e-13	DOWN
SBP	PGSC0003DMG400005196	-1.0178	2.24e-13	1.05e-12	DOWN
WRKY	PGSC0003DMG400005329	-1.1013	1.6e-13	7.57e-13	DOWN
Trihelix	PGSC0003DMG400005408	-2.7001	3.85e-29	3.88e-28	DOWN
C3H	PGSC0003DMG400005636	-3.017	2.26e-55	6.25e-54	DOWN
C2C2-Dof	PGSC0003DMG400005798	-3.624	0.00065676	0.0014235	DOWN
NAC	PGSC0003DMG400005892	-5.1038	7.35e-14	3.56e-13	DOWN
Orphans	PGSC0003DMG400006145	-1.0142	1.42e-10	5.54e-10	DOWN
bZIP	PGSC0003DMG400006211	-2.5591	4.24e-18	2.56e-17	DOWN
TUB	PGSC0003DMG400006371	-3.5133	5.07e-107	5.6e-105	DOWN
bHLH	PGSC0003DMG400006569	-1.3251	1.06e-09	3.86e-09	DOWN
C3H	PGSC0003DMG400006828	-2.5744	7.15e-71	3.17e-69	DOWN
CCAAT	PGSC0003DMG400007131	-2.4947	2.96e-07	8.95e-07	DOWN
C2H2	PGSC0003DMG400007202	-1.0608	1.38e-10	5.38e-10	DOWN
CCAAT	PGSC0003DMG400007350	-1.6578	1.15e-25	9.99e-25	DOWN
MYB	PGSC0003DMG400007603	-1.2087	6.46e-11	2.57e-10	DOWN
Orphans	PGSC0003DMG400007749	-2.0013	4.72e-05	0.00011649	DOWN
Trihelix	PGSC0003DMG400007806	-1.9992	3.59e-36	4.85e-35	DOWN
ARR-B	PGSC0003DMG400007823	-1.0587	1.22e-10	4.75e-10	DOWN
RWP-RK	PGSC0003DMG400007847	-1.2991	1.21e-16	6.81e-16	DOWN
NAC	PGSC0003DMG400007953	-1.5331	4.89e-12	2.1e-11	DOWN
HB	PGSC0003DMG400008057	-4.1224	4.35e-126	7.5e-124	DOWN
ARF	PGSC0003DMG400008081	-1.3129	4.05e-08	1.32e-07	DOWN
HSF	PGSC0003DMG400008223	-2.175	1.94e-46	3.93e-45	DOWN
HMG	PGSC0003DMG400008501	-2.6745	1.28e-72	6.06e-71	DOWN
EIL	PGSC0003DMG400008712	-4.6506	2.36e-190	1.63e-187	DOWN
SNF2	PGSC0003DMG400008774	-1.6683	4.05e-23	3.12e-22	DOWN
C2C2-Dof	PGSC0003DMG400008914	-1.9253	2.09e-19	1.35e-18	DOWN
CCAAT	PGSC0003DMG400008989	-2.0031	2.23e-44	4.21e-43	DOWN
SET	PGSC0003DMG400009044	-3.7039	3.18e-128	5.86e-126	DOWN
C2H2	PGSC0003DMG400009082	-2.183	2.78e-48	5.94e-47	DOWN
PHD	PGSC0003DMG400009121	-1.1281	2.49e-12	1.09e-11	DOWN
NAC	PGSC0003DMG400009245	-1.8732	6.42e-24	5.17e-23	DOWN
bZIP	PGSC0003DMG400009449	-1.3111	1.07e-16	6.03e-16	DOWN
ABI3VP1	PGSC0003DMG400009773	-1.0842	2.14e-12	9.42e-12	DOWN
C2H2	PGSC0003DMG400009859	-2.9478	1.7e-06	4.8e-06	DOWN
bZIP	PGSC0003DMG400010008	-2.1419	1.23e-49	2.81e-48	DOWN
Trihelix	PGSC0003DMG400010197	-2.7363	7.06e-29	7.04e-28	DOWN
SNF2	PGSC0003DMG400010603	-1.6042	4.21e-07	1.26e-06	DOWN
Jumonji	PGSC0003DMG400010853	-2.6385	5.52e-36	7.38e-35	DOWN
Jumonji	PGSC0003DMG400010891	-2.1098	2.43e-43	4.38e-42	DOWN
SBP	PGSC0003DMG400011433	-1.4866	6.71e-07	1.96e-06	DOWN
MYB	PGSC0003DMG400011500	-2.6062	4.51e-71	2.02e-69	DOWN
ARR-B	PGSC0003DMG400011980	-1.8248	4.94e-33	5.82e-32	DOWN
AP2-EREBP	PGSC0003DMG400012038	-2.4315	1.48e-50	3.48e-49	DOWN
TRAF	PGSC0003DMG400012312	-1.8333	1.48e-37	2.11e-36	DOWN
AP2-EREBP	PGSC0003DMG400012524	-1.0135	0.0095895	0.017839	DOWN
AP2-EREBP	PGSC0003DMG400012525	-1.4755	0.0077088	0.014532	DOWN
LUG	PGSC0003DMG400012815	-1.6679	1.27e-07	3.98e-07	DOWN
bZIP	PGSC0003DMG400012962	-2.279	0.00011542	0.00027374	DOWN
HMG	PGSC0003DMG400013103	-2.9598	0.00071257	0.0015377	DOWN
RWP-RK	PGSC0003DMG400013140	-1.4917	8.93e-24	7.12e-23	DOWN
Trihelix	PGSC0003DMG400013300	-3.3617	4.74e-72	2.21e-70	DOWN
AP2-EREBP	PGSC0003DMG400013450	-5.1457	0.0041914	0.0082191	DOWN
C3H	PGSC0003DMG400013655	-2.7859	6.04e-69	2.5e-67	DOWN
AUX/IAA	PGSC0003DMG400013765	-3.0178	3.04e-06	8.41e-06	DOWN
ARF	PGSC0003DMG400014179	-1.753	1.57e-34	1.97e-33	DOWN
HSF	PGSC0003DMG400014323	-3.7715	3.72e-76	1.92e-74	DOWN
AP2-EREBP	PGSC0003DMG400014417	-2.6097	1.57e-40	2.56e-39	DOWN
Rcd1-like	PGSC0003DMG400014419	-1.5932	2.12e-05	5.43e-05	DOWN
C3H	PGSC0003DMG400014565	-2.681	3.98e-62	1.34e-60	DOWN
bHLH	PGSC0003DMG400014705	-1.4257	4.25e-09	1.49e-08	DOWN
GRAS	PGSC0003DMG400014900	-1.2102	3.4e-13	1.58e-12	DOWN
C2H2	PGSC0003DMG400015498	-1.6063	1.3e-22	9.75e-22	DOWN
MYB	PGSC0003DMG400015536	-2.204	3.24e-09	1.14e-08	DOWN
ABI3VP1	PGSC0003DMG400015771	-1.0153	1.07e-11	4.5e-11	DOWN
AP2-EREBP	PGSC0003DMG400015880	-1.9421	4.25e-35	5.47e-34	DOWN
bHLH	PGSC0003DMG400016145	-5.593	0.00044584	0.00098816	DOWN
C3H	PGSC0003DMG400016236	-1.7097	7.01e-31	7.57e-30	DOWN
AUX/IAA	PGSC0003DMG400016317	-2.6383	2.01e-20	1.37e-19	DOWN
TCP	PGSC0003DMG400016363	-1.8233	1.03e-34	1.3e-33	DOWN
SET	PGSC0003DMG400016732	-1.0664	3.14e-09	1.11e-08	DOWN
EIL	PGSC0003DMG400016747	-5.8843	9.55e-14	4.59e-13	DOWN
IWS1	PGSC0003DMG400016781	-2.1384	6.65e-51	1.58e-49	DOWN
bZIP	PGSC0003DMG400016906	-1.1271	7.58e-06	2.02e-05	DOWN
SET	PGSC0003DMG400017150	-3.3397	3.47e-10	1.31e-09	DOWN
HSF	PGSC0003DMG400017484	-1.1088	8.11e-05	0.00019525	DOWN
SET	PGSC0003DMG400017559	-1.2692	1.09e-10	4.29e-10	DOWN
FHA	PGSC0003DMG400017739	-1.5356	4.52e-18	2.73e-17	DOWN
SET	PGSC0003DMG400017957	-4.4385	6.79e-165	2.69e-162	DOWN
MYB	PGSC0003DMG400018092	-1.158	0.0028762	0.0057616	DOWN
HMG	PGSC0003DMG400018099	-1.8527	2.14e-33	2.57e-32	DOWN
bHLH	PGSC0003DMG400018280	-1.6741	4.62e-26	4.07e-25	DOWN
C2C2-Dof	PGSC0003DMG400018408	-3.066	7.76e-20	5.1e-19	DOWN
G2-like	PGSC0003DMG400018426	-1.2455	0.0053614	0.010355	DOWN
MYB	PGSC0003DMG400018702	-2.1203	5.86e-32	6.62e-31	DOWN
AP2-EREBP	PGSC0003DMG400018803	-3.0462	2.84e-27	2.64e-26	DOWN
C2C2-Dof	PGSC0003DMG400018886	-2.084	4.24e-20	2.83e-19	DOWN
bHLH	PGSC0003DMG400018950	-1.7881	4.13e-07	1.23e-06	DOWN
Orphans	PGSC0003DMG400019025	-2.9812	8.02e-17	4.57e-16	DOWN
C2C2-Dof	PGSC0003DMG400019155	-1.7311	0.00053115	0.0011663	DOWN
NAC	PGSC0003DMG400019293	-5.851	8.62e-09	2.95e-08	DOWN
C2H2	PGSC0003DMG400019342	-2.1374	0.0089068	0.016636	DOWN
HSF	PGSC0003DMG400019344	-3.9934	2.26e-36	3.08e-35	DOWN
C2C2-Dof	PGSC0003DMG400019528	-2.4008	0.00021713	0.0004993	DOWN
MADS	PGSC0003DMG400019742	-2.5235	1.36e-58	4.14e-57	DOWN
LUG	PGSC0003DMG400020093	-1.3707	1.17e-21	8.37e-21	DOWN
FHA	PGSC0003DMG400020100	-2.1046	1.04e-28	1.03e-27	DOWN
OFP	PGSC0003DMG400020414	-2.8266	0.0040357	0.0079326	DOWN
G2-like	PGSC0003DMG400020455	-2.4667	0.004578	0.0089224	DOWN
AP2-EREBP	PGSC0003DMG400020625	-1.37	4.89e-22	3.56e-21	DOWN
C3H	PGSC0003DMG400020705	-1.4765	4.11e-20	2.75e-19	DOWN
MYB	PGSC0003DMG400020730	-1.5023	9.1e-05	0.00021821	DOWN
bHLH	PGSC0003DMG400020807	-2.1982	3.81e-24	3.09e-23	DOWN
PHD	PGSC0003DMG400021118	-2.2308	2.54e-40	4.09e-39	DOWN
TRAF	PGSC0003DMG400021210	-1.2165	1.56e-13	7.4e-13	DOWN
MYB	PGSC0003DMG400021459	-1.614	2.98e-24	2.43e-23	DOWN
bHLH	PGSC0003DMG400022058	-1.5772	1.28e-22	9.61e-22	DOWN
WRKY	PGSC0003DMG400022143	-1.4161	8.66e-23	6.56e-22	DOWN
C3H	PGSC0003DMG400022185	-2.4816	1.19e-19	7.75e-19	DOWN
WRKY	PGSC0003DMG400022290	-1.6078	8.22e-26	7.18e-25	DOWN
MYB	PGSC0003DMG400022422	-1.8536	4.07e-07	1.21e-06	DOWN
Jumonji	PGSC0003DMG400022424	-1.3306	3.86e-19	2.46e-18	DOWN
SNF2	PGSC0003DMG400022675	-2.0994	9.25e-49	2.02e-47	DOWN
AP2-EREBP	PGSC0003DMG400022695	-1.6962	2.76e-27	2.57e-26	DOWN
bZIP	PGSC0003DMG400022706	-1.9515	2.05e-27	1.92e-26	DOWN
SBP	PGSC0003DMG400022824	-1.9254	0.0083455	0.015663	DOWN
bZIP	PGSC0003DMG400022931	-1.101	1.56e-05	4.05e-05	DOWN
NAC	PGSC0003DMG400023447	-1.9549	2.52e-22	1.86e-21	DOWN
MYB	PGSC0003DMG400023495	-2.7352	4.18e-33	4.94e-32	DOWN
ARR-B	PGSC0003DMG400023534	-1.4881	7.54e-23	5.73e-22	DOWN
GRAS	PGSC0003DMG400023556	-1.2872	0.00067358	0.0014578	DOWN
C2C2-GATA	PGSC0003DMG400023781	-2.9729	5.14e-06	1.39e-05	DOWN
SNF2	PGSC0003DMG400023950	-1.7621	4.22e-35	5.44e-34	DOWN
HB	PGSC0003DMG400024157	-1.8309	2.16e-15	1.15e-14	DOWN
MYB	PGSC0003DMG400024572	-2.4982	9.91e-55	2.69e-53	DOWN
C3H	PGSC0003DMG400024801	-2.4545	1.13e-63	4e-62	DOWN
SWI/SNF-BAF60b	PGSC0003DMG400024881	-1.8104	7.02e-10	2.59e-09	DOWN
TCP	PGSC0003DMG400024928	-2.8546	3.35e-80	1.9e-78	DOWN
MYB	PGSC0003DMG400024983	-1.4289	1.17e-22	8.77e-22	DOWN
C2C2-Dof	PGSC0003DMG400025129	-2.1445	2.24e-31	2.46e-30	DOWN
MYB	PGSC0003DMG400025612	-1.5002	5.25e-09	1.82e-08	DOWN
G2-like	PGSC0003DMG400025801	-1.3886	7.3e-22	5.29e-21	DOWN
HB	PGSC0003DMG400025984	-2.9498	3.03e-12	1.32e-11	DOWN
GRAS	PGSC0003DMG400026191	-1.8802	0.00043938	0.00097467	DOWN
GeBP	PGSC0003DMG400026195	-1.5686	6.64e-22	4.81e-21	DOWN
SET	PGSC0003DMG400026247	-2.9401	0.0054451	0.010501	DOWN
C2C2-GATA	PGSC0003DMG400026248	-1.3383	1.17e-18	7.26e-18	DOWN
HB	PGSC0003DMG400026264	-1.1727	3.33e-13	1.55e-12	DOWN
HB	PGSC0003DMG400026460	-1.2538	7.06e-18	4.22e-17	DOWN
C3H	PGSC0003DMG400026524	-3.0006	1.44e-65	5.39e-64	DOWN
NAC	PGSC0003DMG400026848	-1.8867	0.0003439	0.00077216	DOWN
IWS1	PGSC0003DMG400027098	-1.2781	1.04e-19	6.77e-19	DOWN
MYB	PGSC0003DMG400027190	-1.6653	2.01e-21	1.42e-20	DOWN
ABI3VP1	PGSC0003DMG400027236	-1.6232	2.09e-15	1.11e-14	DOWN
Orphans	PGSC0003DMG400027274	-1.6839	5.96e-09	2.06e-08	DOWN
CCAAT	PGSC0003DMG400027390	-2.5495	3.6e-21	2.53e-20	DOWN
C2C2-CO-like	PGSC0003DMG400027475	-5.0864	2.78e-05	7.03e-05	DOWN
bZIP	PGSC0003DMG400027562	-1.0551	7.65e-09	2.62e-08	DOWN
Orphans	PGSC0003DMG400027651	-1.6285	2.18e-28	2.13e-27	DOWN
C3H	PGSC0003DMG400027902	-2.1407	2.21e-49	4.98e-48	DOWN
C3H	PGSC0003DMG400028265	-1.7803	1.82e-35	2.39e-34	DOWN
BES1	PGSC0003DMG400028459	-1.4157	2.62e-11	1.07e-10	DOWN
NAC	PGSC0003DMG400028662	-2.0578	1.51e-27	1.43e-26	DOWN
Orphans	PGSC0003DMG400028818	-2.4206	2.24e-29	2.27e-28	DOWN
bZIP	PGSC0003DMG400029118	-1.1968	8.14e-10	2.99e-09	DOWN
C2C2-CO-like	PGSC0003DMG400029365	-1.546	1.36e-05	3.54e-05	DOWN
Orphans	PGSC0003DMG400029426	-1.714	1.4e-23	1.1e-22	DOWN
C2C2-Dof	PGSC0003DMG400029708	-2.2188	0.00086172	0.0018414	DOWN
Trihelix	PGSC0003DMG400029747	-1.7362	5.39e-07	1.59e-06	DOWN
MBF1	PGSC0003DMG400029773	-2.9318	5.17e-34	6.34e-33	DOWN
bZIP	PGSC0003DMG400029774	-1.9144	4.25e-11	1.72e-10	DOWN
GRAS	PGSC0003DMG400029921	-1.3142	2.64e-11	1.08e-10	DOWN
Trihelix	PGSC0003DMG400030023	-1.9615	6.45e-36	8.61e-35	DOWN
C3H	PGSC0003DMG400030361	-1.1489	3.93e-16	2.17e-15	DOWN
G2-like	PGSC0003DMG400030389	-1.4703	1.25e-08	4.22e-08	DOWN
MYB	PGSC0003DMG400030397	-1.9242	3.38e-32	3.87e-31	DOWN
C2C2-Dof	PGSC0003DMG400030406	-1.7682	1.19e-08	4.01e-08	DOWN
GRAS	PGSC0003DMG400030468	-2.695	5.75e-23	4.4e-22	DOWN
HB	PGSC0003DMG400030737	-1.7633	3.91e-35	5.04e-34	DOWN
SNF2	PGSC0003DMG400030952	-1.2961	7.7e-17	4.4e-16	DOWN
PHD	PGSC0003DMG400030955	-1.4414	1.99e-20	1.35e-19	DOWN
CCAAT	PGSC0003DMG400030986	-3.0567	0.00086104	0.0018401	DOWN
ABI3VP1	PGSC0003DMG400031023	-1.8316	8.46e-12	3.58e-11	DOWN
ABI3VP1	PGSC0003DMG400031024	-1.8877	2.34e-29	2.37e-28	DOWN
bHLH	PGSC0003DMG400031314	-2.1455	3.11e-19	1.99e-18	DOWN
TAZ	PGSC0003DMG400031372	-1.6233	2.49e-11	1.02e-10	DOWN
Trihelix	PGSC0003DMG400031382	-1.6868	3.14e-28	3.04e-27	DOWN
HB	PGSC0003DMG400031777	-1.6251	0.00010892	0.00025895	DOWN
OFP	PGSC0003DMG400032276	-3.8574	5.04e-16	2.76e-15	DOWN
CCAAT	PGSC0003DMG400032552	-1.6544	6.69e-20	4.41e-19	DOWN
C2C2-Dof	PGSC0003DMG400033046	-3.381	1.3e-73	6.3e-72	DOWN
MADS	PGSC0003DMG400033570	-1.5882	7.44e-12	3.16e-11	DOWN
HRT	PGSC0003DMG400033614	-1.7119	1.03e-23	8.16e-23	DOWN
CCAAT	PGSC0003DMG400034306	-1.0945	4.23e-05	0.00010469	DOWN
Rcd1-like	PGSC0003DMG400041536	-2.9155	0.0025574	0.005151	DOWN
MADS	PGSC0003DMG400042442	-3.4666	6.34e-06	1.7e-05	DOWN
C2C2-GATA	PGSC0003DMG400044001	-2.3955	2.38e-05	6.05e-05	DOWN
CCAAT	PGSC0003DMG400044580	-1.3239	2.19e-05	5.6e-05	DOWN
GeBP	PGSC0003DMG400046446	-2.3466	7.23e-28	6.92e-27	DOWN
SNF2	PGSC0003DMG401000051	-1.2102	9.18e-09	3.13e-08	DOWN
HSF	PGSC0003DMG401002683	-2.8403	1.98e-70	8.64e-69	DOWN
E2F-DP	PGSC0003DMG401005482	-2.8006	1.15e-33	1.39e-32	DOWN
WRKY	PGSC0003DMG401005575	-1.4766	1.24e-22	9.27e-22	DOWN
RWP-RK	PGSC0003DMG401005796	-1.5958	1.28e-25	1.11e-24	DOWN
SBP	PGSC0003DMG401006284	-2.0101	1.07e-42	1.89e-41	DOWN
HB	PGSC0003DMG401008054	-1.9913	1.56e-37	2.22e-36	DOWN
Orphans	PGSC0003DMG401010056	-2.7917	1.02e-38	1.54e-37	DOWN
MYB	PGSC0003DMG401010883	-5.9846	1.65e-30	1.76e-29	DOWN
SWI/SNF-BAF60b	PGSC0003DMG401012010	-1.5154	8.12e-22	5.86e-21	DOWN
ABI3VP1	PGSC0003DMG401015175	-1.5852	1.51e-18	9.33e-18	DOWN
GNAT	PGSC0003DMG401015202	-2.227	3.27e-53	8.48e-52	DOWN
bHLH	PGSC0003DMG401015926	-1.9488	2.79e-30	2.94e-29	DOWN
PHD	PGSC0003DMG401017043	-1.8037	3.6e-18	2.19e-17	DOWN
zf-HD	PGSC0003DMG401017193	-1.6809	5.28e-18	3.17e-17	DOWN
ARID	PGSC0003DMG401018896	-1.3964	0.00010827	0.00025747	DOWN
HSF	PGSC0003DMG401019343	-4.8167	4.14e-96	3.49e-94	DOWN
TRAF	PGSC0003DMG401020126	-1.6955	2.92e-26	2.6e-25	DOWN
CCAAT	PGSC0003DMG401021124	-1.1156	4.63e-11	1.86e-10	DOWN
MADS	PGSC0003DMG401024252	-1.1965	0.00016096	0.00037572	DOWN
CCAAT	PGSC0003DMG401024603	-2.1487	1.1e-05	2.89e-05	DOWN
bHLH	PGSC0003DMG401028788	-2.951	5.11e-85	3.31e-83	DOWN
SBP	PGSC0003DMG401029709	-2.7244	1.4e-15	7.49e-15	DOWN
CCAAT	PGSC0003DMG401030137	-1.5715	9.69e-25	8.08e-24	DOWN
GNAT	PGSC0003DMG401031287	-1.3697	6.2e-18	3.72e-17	DOWN
RWP-RK	PGSC0003DMG401032501	-1.708	1.64e-16	9.18e-16	DOWN
ABI3VP1	PGSC0003DMG402009541	-1.5274	4.03e-18	2.44e-17	DOWN
C2C2-CO-like	PGSC0003DMG402010056	-2.2218	2.11e-38	3.13e-37	DOWN
AP2-EREBP	PGSC0003DMG402013892	-1.552	7.11e-10	2.62e-09	DOWN
MYB	PGSC0003DMG402017733	-1.9505	5.17e-32	5.86e-31	DOWN
HMG	PGSC0003DMG402018896	-1.4595	1.6e-15	8.55e-15	DOWN
HSF	PGSC0003DMG402019343	-3.747	1.59e-62	5.47e-61	DOWN
TRAF	PGSC0003DMG402020126	-2.656	5.12e-10	1.91e-09	DOWN
PHD	PGSC0003DMG402022202	-1.7928	2.74e-19	1.76e-18	DOWN
C3H	PGSC0003DMG402025318	-1.1273	1.76e-10	6.81e-10	DOWN
SBP	PGSC0003DMG402029709	-4.1097	1.02e-06	2.95e-06	DOWN
MYB	PGSC0003DMG402030895	-1.4179	3.38e-11	1.38e-10	DOWN
C2H2	PGSC0003DMG402031064	-3.819	4.99e-20	3.31e-19	DOWN
WRKY	PGSC0003DMG402033880	-1.0463	4.75e-06	1.29e-05	DOWN
SOH1	PGSC0003DMG403008332	-1.1534	9.3e-10	3.41e-09	DOWN
C2C2-GATA	PGSC0003DMG403025785	-2.678	4.79e-56	1.35e-54	DOWN
MADS	PGSC0003DMG403026197	-1.5531	3.27e-15	1.72e-14	DOWN
