# Supplementary figures and images for: A Genome-Wide View of the Transcriptome Dynamics of Fresh-Cut Potato Tubers
Source: MDPI journal article supplement (doi:10.3390/genes14010181), 2023-01-10

a

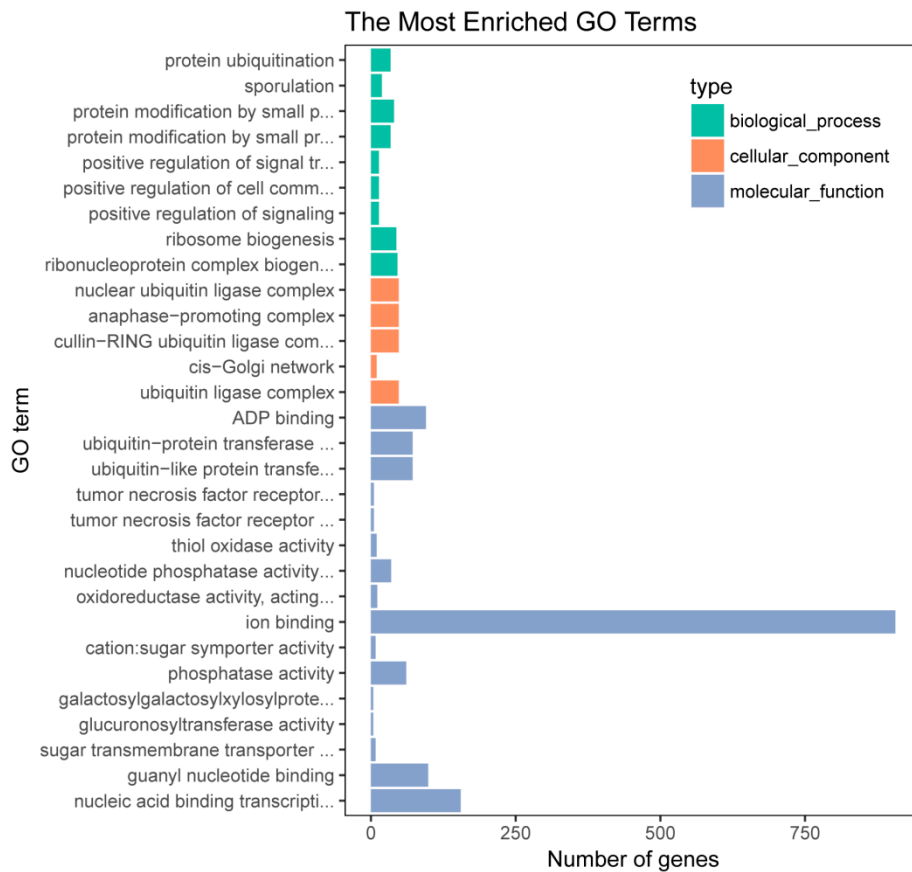

b

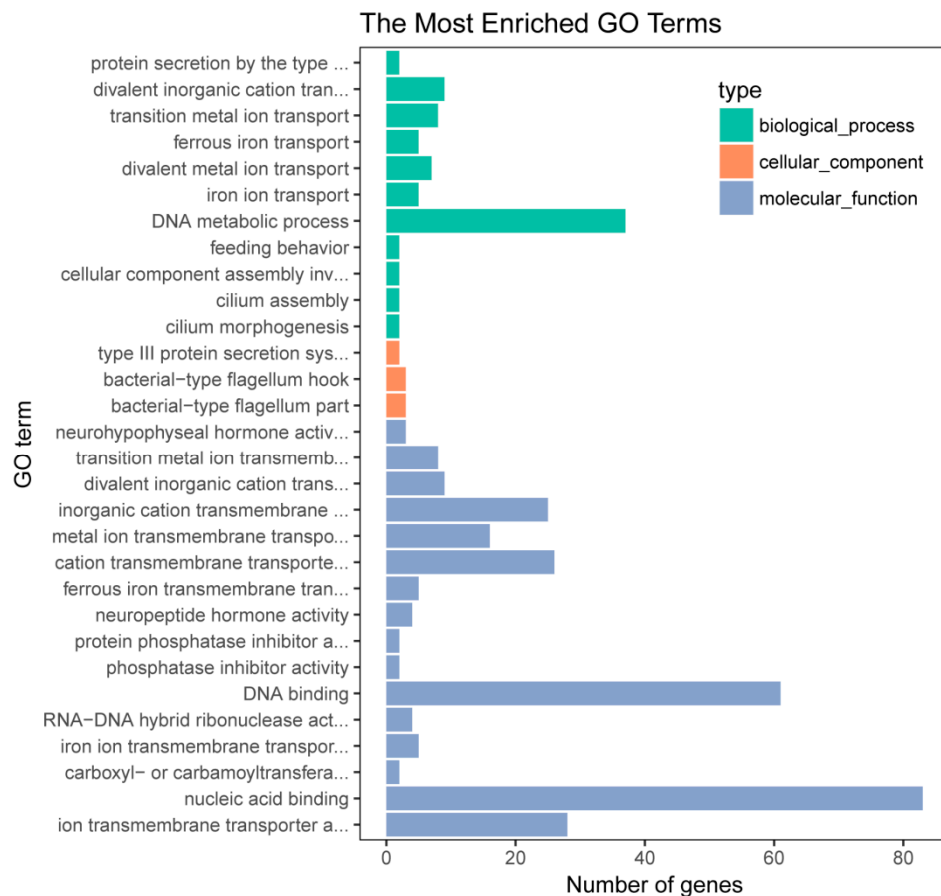

c

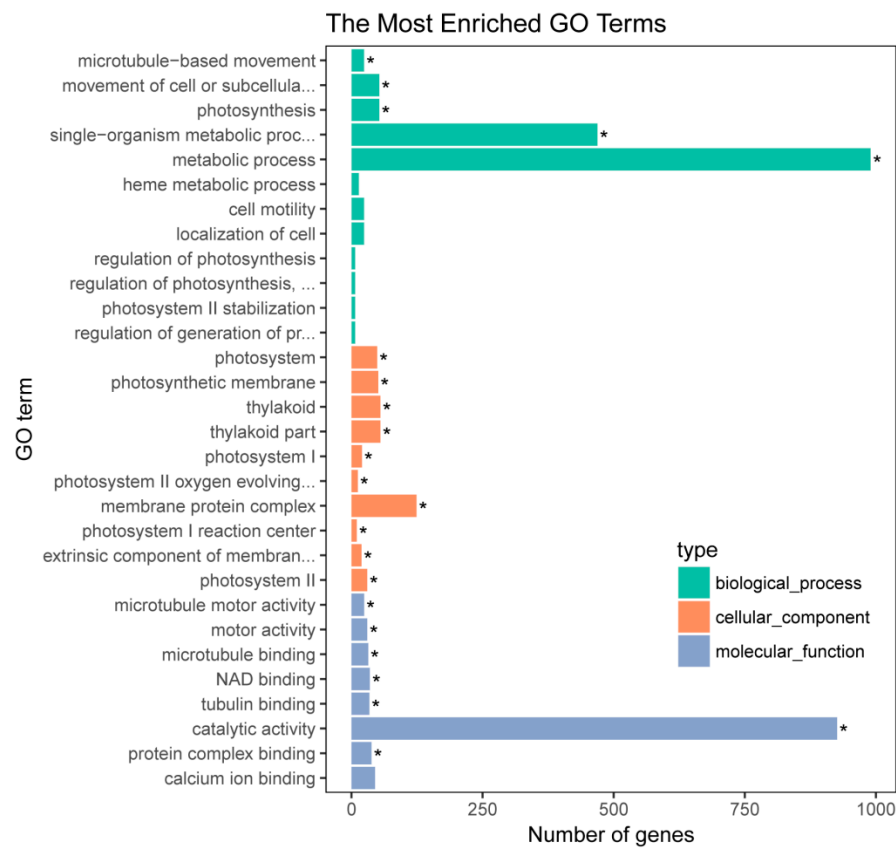

Figure S4 GO enrichment of specific DEGs of potato tubers at 4 h (a), 12 h (b) and 24 h (c) after cut-wounding.

Supplement: s1 [file s1]
